# Supplementary material for: A silkworm model reveals coordinated cellular communities and conserved Hippo regulation in silk production
Source: Research Square preprint supplement (doi:10.21203/rs.3.rs-7747598/v1), 2025-10-01
Supplement: Supplementary file 1 [file Source data.xlsx]

## Sheet: main
Source data of Fig. 5c, Fig. 5e, Fig. 5g, Fig. 5h, Fig. S6c, Fig. S6e and Fig. S6f

## Sheet: Fig. 5c
Trait investigation of L5D6 SG
	DNA content of L5D6 PSG(μg)			L5D6 PSG weight（g）		L5D6 SG weight(g)		Mean of L5D6 PSG length(cm)		SD of L5D6 PSG length(cm)
WT	20.083	33.2845	23.599	2.6351		10.8052		10.3317		0.487293
YkiOE	49.8905	62.6645	49.4335	0.912		6.5756		5.255		0.630691
YkiKO	15.838	15.93	24.852	4.5354		10.9336		8.88333		0.687458

## Sheet: Fig. 5e
Source data of qRT-PCR experiment
Stage and region	strain	Gene name	Mean of of three relative expression levels	SD
L1D1 PSG	WT	CycE	0.000433318	7.4571e-05
		CDK2	0.000937364	8.92e-05
		MCM3	0.005543	0.000552
		MCM6	0.00222756	0.0002499
		MCM10	0.000414614	5.1935e-05
		fibH	57.04	5.13462
		fibL	45.3118	4.73819
		P25	5.74375	0.597228
	YkiOE	CycE	0.00315996	0.00040118
		CDK2	0.00365452	0.000126
		MCM3	0.007763	0.000265
		MCM6	0.00465046	0.0007299
		MCM10	0.000988925	0.0001946
		fibH	29.458	2.66348
		fibL	25.1533	1.85728
		P25	3.28171	0.309905
	YkiKO	CycE	0.000176885	3.8718e-05
		CDK2	0.000706961	2.46e-05
		MCM3	0.004068	0.00071
		MCM6	0.0018	0.0003615
		MCM10	0.000419401	1.4945e-05
		fibH	48.5686	3.11426
		fibL	55.5697	4.26921
		P25	6.41173	0.246153

## Sheet: Fig. 5g
Source data of qRT-PCR experiment
strain	Stage and region	Gene name	Mean of of three relative expression levels
WT	L4D1 PSG	E2F1	0.0044759
		cycE	0.00236147
		CDK2	0.00610306
		cycA	0.0157377
		Fzr	0.00615574
		MCM3	0.00972065
		MCM6	0.011504
		MCM8	0.00329714
		MCM9	0.0014109
		MCM10	0.00400243
	L4D2 PSG	E2F1	0.0018029
		cycE	0.00314428
		CDK2	0.00667319
		cycA	0.00864775
		Fzr	0.00526322
		MCM3	0.00888142
		MCM6	0.0125579
		MCM8	0.00549804
		MCM9	0.000497257
		MCM10	0.000245021
	L4D3 PSG	E2F1	0.00164732
		cycE	0.00396232
		CDK2	0.00812433
		cycA	0.0122619
		Fzr	0.00704825
		MCM3	0.0131092
		MCM6	0.0153131
		MCM8	0.0068648
		MCM9	0.000917881
		MCM10	0.000973765
YkiOE	L4D1 PSG	E2F1	0.0219459
		cycE	0.0219754
		CDK2	0.0214172
		cycA	0.0885332
		Fzr	0.0462568
		MCM3	0.0408807
		MCM6	0.0507568
		MCM8	0.0164768
		MCM9	0.0136387
		MCM10	0.0234364
	L4D2 PSG	E2F1	0.00445175
		cycE	0.00374754
		CDK2	0.0116229
		cycA	0.0137642
		Fzr	0.0156645
		MCM3	0.0160412
		MCM6	0.0124696
		MCM8	0.00359097
		MCM9	0.00268744
		MCM10	0.00651478
	L4D3 PSG	E2F1	0.014216
		cycE	0.0101201
		CDK2	0.0197683
		cycA	0.0775114
		Fzr	0.137521
		MCM3	0.0222828
		MCM6	0.0249053
		MCM8	0.0118438
		MCM9	0.00970611
		MCM10	0.0147493
YkiKO	L4D1 PSG	E2F1	0.00428654
		cycE	0.00360853
		CDK2	0.0119022
		cycA	0.012374
		Fzr	0.00888438
		MCM3	0.00898802
		MCM6	0.00973539
		MCM8	0.0039095
		MCM9	0.000549476
		MCM10	0.000941303
	L4D2 PSG	E2F1	0.00163388
		cycE	0.00169188
		CDK2	0.00609073
		cycA	0.00869304
		Fzr	0.00800374
		MCM3	0.00662404
		MCM6	0.00804118
		MCM8	0.00460524
		MCM9	0.00028035
		MCM10	0.000361413
	L4D3 PSG	E2F1	0.00427333
		cycE	0.00420947
		CDK2	0.00956828
		cycA	0.0287816
		Fzr	0.0322758
		MCM3	0.00923346
		MCM6	0.00915915
		MCM8	0.00484989
		MCM9	0.000990936
		MCM10	0.00093732

## Sheet: Fig. 5h
Source data of qRT-PCR experiment
strain	Stage and region	Gene name	Mean of of three relative expression levels	SD
WT	L1D3 PSG	ATG3	0.0310555	0.002896
		ATG5	0.008946	0.001643
		ATG6	0.014186	0.000525
		ATG7	0.007346	0.001588
		ATG12	0.002343	0.000485
		Ftz-f1	0.003052	0.000109
		Hr3	0.204034	0.004335
		Hr4	0.033592	0.004137
	L1M PSG	ATG3	0.0076758	0.001493
		ATG5	0.006059	0.000498
		ATG6	0.017415	0.002043
		ATG7	0.004396	0.001714
		ATG12	0.002081	0.000717
		Ftz-f1	0.690999	0.059012
		Hr3	0.125462	0.020271
		Hr4	0.132546	0.026288
YkiOE	L1D3 PSG	ATG3	0.0424563	0.002787
		ATG5	0.007728	0.000336
		ATG6	0.024849	0.005099
		ATG7	0.008781	0.0012
		ATG12	0.002864	0.000654
		Ftz-f1	0.025688	0.00087
		Hr3	0.452787	0.01003
		Hr4	0.26778	0.037488
	L1M PSG	ATG3	0.0436775	0.003424
		ATG5	0.012316	0.002401
		ATG6	0.045615	0.008765
		ATG7	0.008401	0.001971
		ATG12	0.003227	0.000709
		Ftz-f1	0.230972	0.072119
		Hr3	0.135833	0.010972
		Hr4	0.184202	0.045622
YkiKO	L1D3 PSG	ATG3	0.0686747	0.009534
		ATG5	0.009535	0.001181
		ATG6	0.025415	0.001543
		ATG7	0.009073	0.000637
		ATG12	0.006286	0.000907
		Ftz-f1	0.006652	0.000857
		Hr3	0.942181	0.036833
		Hr4	0.233218	0.041777
	L1M PSG	ATG3	0.0135928	0.001498
		ATG5	0.005848	0.00061
		ATG6	0.022094	0.003531
		ATG7	0.003946	0.001001
		ATG12	0.002071	0.000792
		Ftz-f1	0.478777	0.060479
		Hr3	0.0932203	0.010803
		Hr4	0.15178	0.042638

## Sheet: Fig. S6c
Source data of qRT-PCR experiment
Stage and region	strain	Gene name	Mean of of three relative expression levels	SD
L5D6 PSG	WT	fibH	408.681	14.2458
		fibL	331.1	6.20653
		P25	42.125	1.30732
		Dimm	0.0278212	0.00144531
		FMBP-1	0.00051782	5.72805e-05
	YkiOE	fibH	28.6735	2.1257
		fibL	74.5469	3.1921
		P25	8.46344	0.23697
		Dimm	0.00793644	0.000159614
		FMBP-1	0.00157421	8.23454e-05
	YkiKO	fibH	238.751	30.629
		fibL	205.55	10.8814
		P25	22.1314	1.32395
		Dimm	0.0295889	0.00633393
		FMBP-1	0.00173528	0.000408603

## Sheet: Fig. S6e
Nucleus size and numbers investigation of L1D1 PSG
	Nucleus size of cells in L1D1 PSG (μm2)						Number of cells in L1D1 PSG
WT	48.745	51.627	48.608	47.753	44.65	49.273	326	324	326	334	324	330
YKIOE	195.001	193.714	174.007	154.458	153.318	141.622	344	330	324	320	336	320
YKIKO	37.979	39.678	50.001	51.954	50.93	39.256	350	346	348	346	337	344

## Sheet: Fig. S6f
Source data of qRT-PCR experiment
Stage and region	strain	Gene name	Mean of of three relative expression levels	SD
L1D1 PSG	WT	Dimm	0.151742	0.017741
	YkiOE		0.0714776	0.020445
	YkiKO		0.146956	0.002363
	WT	Sage	0.08215	0.010244
	YkiOE		0.052438	0.006064
	YkiKO		0.100155	0.002515
	WT	FMBP-1	0.00387966	0.000326
	YkiOE		0.0114129	0.000199
	YkiKO		0.00435094	0.000472
