# Supplementary material for: A silkworm model reveals coordinated cellular communities and conserved Hippo regulation in silk production
Source: Research Square preprint supplement (doi:10.21203/rs.3.rs-7747598/v1), 2025-10-01
Supplement: Supplementary file 5 [file Supplementary Data 1.xlsx]

## Sheet: main
Supplementary Data 1. Number of nuclei in each cell type

## Sheet: Number of nuclei in cell types
	B. mori_L4M	B. mori_L5D1	B. mori_L5D3	B. mori_L5D5	B. mandarina_L5D6
CBCs	517	3358	5347	4791	1927
ESMs	2114	3836	6659	5733	1795
ECRs	7083	16	19	11	1
FBSs	396	646	3167	3384	451
CSSs	955	888	1582	323	373
NCSs	6463	10657	3097	389	105
HMSs	1457	922	166	141	16
