# Supplementary material for: A silkworm model reveals coordinated cellular communities and conserved Hippo regulation in silk production
Source: Research Square preprint supplement (doi:10.21203/rs.3.rs-7747598/v1), 2025-10-01
Supplement: Supplementary file 9 [file Supplementary Data 10.xlsx]

## Sheet: main
Supplementary Data 10. Correlations between the expression of the Hippo signaling pathway genes, ribosome genes, and fibroin genes in FBSs.
1	L4M
2	L5D1
3	L5D3
4	L5D5

## Sheet: 1-L4M
	Ribosome and fiborin genes	Hippo_signaling_pathway
TGGCATGTCCAAGTTGATTCTGGC_5	2.05868854994792	0.00307487640966536
TGGTAGCTGCCTTGTTGCTGTTGT_5	1.99404439044638	0.00964320386721008
ACGTTCAGTGGAGTTGCTCAGCTA_5	1.39857990407755	-0.00431092
CGCAATCTGTCTCCTTTCACGTTC_5	1.93370055195991	0.093482636445188
CGCATGATGACGAATGGCTTCGAA_5	2.36504239685976	-0.0621835
CTGTTGACGTCTGATCGTGTTCCT_5	1.65882614869552	-0.0573916
TTGCAGACGTATGCTGCACTGACA_5	2.04619899342276	-0.00995739
CGCATGATGACGAATGCCAGTGTT_5	2.36724027761597	-0.011801
CCTGATTGTAAGTGGCCGATGCTT_5	1.89634434813197	0.0797458535914972
ATCACACGGTAGAGCAAGTCAGGA_5	2.00423019743231	-0.0147805
ATCGATCGTCGAACCAGCTTCGAA_5	2.38247862717248	0.0305909595820336
TTCCAAGGCGGATTGAAGCAGATG_5	2.04068920042403	0.0556965449443141
GTCGAAGACTCATTGCCATGGAAC_5	2.2306859432375	0.0268881710358034
CCTTGTAGACGATGACCCTTCCTT_5	2.01716879418229	-0.0372553
ACTCTCGATGAGGTGTACTGCTAG_5	2.01442338074314	-0.0943142
TTGCAGACGCTCTGTACTCTGGTT_5	2.15804285864569	-0.0839078
GATGTGTGTTGATCCGCTCTGGTT_5	1.98542319055032	-0.0054654
AGCACTTCTGGAGAGTTCTGAGAG_5	2.38028838649005	0.0890751907865917
GATGTGTGTCTCTAGGGCACGTAA_5	1.97392164647417	-0.0515315
GATTACCGTGCCATTCGCTTCGAA_5	2.11791306422212	-0.0431287
AAGCACTGCTGACACAGTAGCATC_5	2.08093629810834	-0.00380846
CACCTGTTCTAGGTGAACTGTGTC_5	1.92191632001258	0.0294618488475311
TAACCGGTAGCTCCTATTAGGTCG_5	2.35401269754256	0.0188816819971804
GATAGGCTACCTAAGGCACTGACA_5	2.52498823714433	-0.0612794
GTGAAGTGTGTGCGTTTACACGCT_5	2.22529199414687	-0.0019543
TTCCAAGGAAGGACACAGGATGGT_5	2.23304214801816	-0.0440723
AACCGTTCGACTTAGGTATCAGCG_5	2.05380274590475	0.0787191772748937
GTTACGCATCGAAGGTCTGCGTAT_5	1.94779556543091	0.038299968113919
GAGACGATTGCAGGTATCGTGGAT_5	2.06770335169868	-0.0170116
TTCGTTGGACTCGTTGGTCTAGGT_5	1.92551933243128	9.16798341092373e-05
ACGACTTGGAGGACTTCGAACTGT_5	2.14595109106116	-0.033723
CTTGTCGAGCCATAACACCGCATA_5	1.89983424887888	0.0926070899595808
GTTACGCACTTGCTGTGATTGGAG_5	2.46796974251876	-0.0325426
TGTGACTGTCGAAGGTAGGATCTG_5	2.03890133143405	-0.0958227
GTCGAAGAAGAAGCGTTGCCTCTT_5	2.00041338281828	0.0623388333526604
GTTCTCGTTGTGCGTTTTCTCTCG_5	2.0761796900057	-0.0740882
ATCGCCATTTCAGGAGCTACAGTG_5	2.17780120291831	-0.0547217
GTGCCATACTGGAGTAGTTCATGG_5	2.33591637597619	-0.0428089
ACGTTCAGAGGCTTCTATGGAAGG_5	1.81700074116965	-0.0731688
CGACGTTAGAGATGTCCACCACTA_5	1.99990580128904	-0.00471853
GCGTCATTACCTAAGGTTGACAGG_5	2.2383055007448	-0.0255516
TGAGCTAGAGGTTCGAACATAGGC_5	2.17220794485905	-0.0677527
ACGACTTGAGTGCAGTGCTTCGAA_5	2.3304653747026	-0.0715662
GTGCCATAGTCCTAAGAACTGGTG_5	2.23791778545504	-0.0306187
GTTGTTCGACCTAAGGGCGTTCTA_5	1.76153463255484	-0.0565734
GCGTCATTGAAGAGGTGTCTAGGT_5	1.7749	-0.00800596
TGAGCTAGGCTGGATTTCCGAGTT_5	2.14700591827755	-0.0273721
CACTAGCTACCAGCTTACTGCTAG_5	1.94081439629342	0.0338579508972842
CGGCTAATTGCCATTCAGGATGGT_5	2.24610251664917	-0.00789174
TGTGACTGAGTCGACAAACCGAAG_5	2.31549172036017	-0.0809342
ACTAGGAGGAGATGTCAACTGGTG_5	2.16492248978672	0.154122068096649
CCTTGTAGAGTCTGTGACCTTCTC_5	2.36787163609992	-0.0552641
AGCGTGTTTACATCGGAGGATCTG_5	2.14764297900437	-0.0328254
CGACGTTATGTGCGTTGCAATTCG_5	2.3129192646454	0.058702170226272
CTTGTCGATAAGTGGCGCTTAGCT_5	2.25214728077987	-0.0277511
CCTGATTGTCCGTATGGTTCATGG_5	1.77841150714491	0.0297245711993262
GATCGAGTGTCGGTAACACCACTA_5	2.23468330774209	-0.0399206
TCAGGCTTGTCGGTAACTCTGGTT_5	2.26306131994014	-0.107681
TTCCAAGGCGTTATGCACCTTCTC_5	2.0937691156178	-0.00537559
TATCGGTCTGATCGGACAGGTATC_5	2.36198699093173	-0.0767218
GAATCCGACGAGACTATGGTCCTT_5	2.38345640658756	-0.0134605
GTAGGAGTTCTAACGCGCTTCTTG_5	2.2592392813659	-0.00726843
CGCATGATTTCAGGAGCACTGACA_5	2.2927037711124	-0.0614678
AGCACTTCCGACCATTCAAGTGCA_5	2.19828485097977	-0.0811424
GCAAGATCAGTCGACATCTCCGAT_5	2.30682546667706	0.0281746513299539
ATCGCCATGACTATGCAGGCATAG_5	2.23130138421535	-0.0705643
TACGCTACGACTTAGGAAGAGCCA_5	2.18864654680754	-0.0758894
CGGCTAATATTCGAGGTTAGGTCG_5	2.08846856790381	0.0583042587432028
CAACACCTAATGCCTCTCTCCGAT_5	1.97251177427555	0.0486463608407506
CTGTTGACCATTCGGTTCGTAGTC_5	2.05034204150148	-0.0343641
GCTATCCTCGTCAATGCTTCGTTC_5	2.28327028238358	-0.00837942
GTCATCGAAGTGCAGTTAGGATGC_5	1.95406223578776	-0.0467181
CGTTGCAAGTAGAGCACATGGAAC_5	2.35126106071984	0.0972361443441144
TTGCGAAGAGGTTCGATTACGGCT_5	1.21979718553627	0.0560604727376192
ATCCAGAGAGTCTGTGACATAGGC_5	2.18515799663858	-0.03529
TAACCGGTAGTGCAGTCCTTCCTT_5	2.28964430011317	-0.0811878
TACGCTACAAGGACACACCATGTG_5	2.35928346208179	0.0038167591098149
TGGCATGTCGACCATTCACCACTA_5	2.06671760357023	0.0298321167949137
TTGCGAAGATTCGAGGCTTCGTTC_5	2.23002927420722	0.0349413115918154
CGCTCTATGTATGCTGGATCGTAC_5	2.08259749691747	-0.0766529
ACTCCATCAATGGACGCATGGAAC_5	2.14998892150338	-0.037995
ACCACGATACCAATGCGACAAGAG_5	2.23225277829619	-0.0359095
CGACGTTAGTCTCCTTCACTGACA_5	2.25428900255629	-0.0175236
GATGTGTGTGGAGAGTTTGTCGGT_5	2.22641926193901	-0.0691066
ATCCAGAGGAATCGTGTCAGACGA_5	2.16037769082473	-0.00448261
CTTCGACTGCCTTGTTTCTGCTCT_5	2.26645282560792	-0.015714
TGGTACAGGATACTGGTTGACAGG_5	1.89561931065859	-0.0429439
TGCTTCCATCGAAGGTAGGATCTG_5	2.19310207570243	-0.0684454
TGGTACAGAGGCTTCTAACCTTGG_5	2.07159316599504	-0.0892195
GAAGGAAGGAGATGTCTATCAGCG_5	2.29695480772027	-0.0280053
ATCGATCGGTATGCTGGAGCTCAA_5	2.18852949701748	0.0598527801823926
GTCGAAGACTGACACAAAGAGCCA_5	2.29827777421379	-0.0405776
GAAGGAAGCAGAATCGTCTCCGAT_5	2.37606603009292	0.00939773650199727
TGGCATGTACGTGATGTCGTGGAT_5	2.18182485632996	-0.00706739
GCAAGATCTAAGTGGCTAGCCGAA_5	2.38661215276745	0.00313207211557129
CCTTGTAGCGTTATGCAGGCATAG_5	2.11610444416452	0.00052364656650887
GAACATCGCATTCGGTGTATTGGC_5	2.1513581487739	-0.0625874
GCTATCCTATGGTTGCAGTCAGGA_5	2.17819325037671	-0.0480458
CACTAGCTTAAGTGGCATTCTGGC_5	2.17260541325069	-0.0596076
ACTGAGGTCGATAGAGCAGCGATT_5	2.19276318613266	-0.0639522
TTCCAAGGCTAGGCATAAGGCTGA_5	2.04738897266796	0.0661685812661966
GTCGAAGAGATGCACTTTGACAGG_5	2.21020197910521	-0.0584715
CCTTGATCGATGCACTAACGGTCA_5	2.28608642810107	0.011195141027955
CATACCACCAACCTAGCGAGTATG_5	2.27801894567258	-0.045438
CACTAGCTGATGCACTAACCTCCT_5	2.21400544720847	0.0735996628832171
CATGGCTACCGACTATTGTGGTAC_5	2.19471279254301	-0.0702778
GACGATCTTAAGTGGCTTGACAGG_5	2.35407653207508	-0.0441571
GAGCAGTAGATGCACTCATCTACG_5	2.03808535001946	-0.0302152
TTCGTTGGAATGGACGCTTCGTTC_5	2.25998214287941	-0.0863441
AAGCACTGGCCATAACTAGGATGC_5	2.07179097511685	0.083129066440405
GCGTCATTGATGCACTGATTGGAG_5	2.29986424500335	0.0208594634720347
GTCGAAGAGTCGGTAAGCACGTAA_5	2.29752297545356	-0.049844
ATCCGGTACAATCGACCAGCGATT_5	2.2960144107657	-0.0547028
TCGCTGTTTGATCGGATTACGGCT_5	2.13260777682344	0.107067650223306
ACGTTCAGGTCGGTAACGTGTACT_5	2.45149849972596	0.0213065737376313
CTTAGGACCTTACAGCCTTCGTTC_5	1.97208372096416	-0.00503319
CAACACCTCGTACGAACTAACTCG_5	2.35306024943415	-0.0286368
TACGCTACTACGGTTGACATAGGC_5	2.20755615211622	-0.00531843
CCTTGATCTCGAAGGTTCTCCGAT_5	2.21083881494126	-0.0300518
CTTCGACTAGTGCAGTCGAGTATG_5	2.01133737407413	0.00244667005074312
ACGTTCAGCGATAGAGCGGAATAC_5	2.34076712407566	-0.0102691
GTTCTCGTGAGGACTTGATTGGAG_5	2.05665675245513	0.00108361047177272
CCTTGATCGTCAGTTGGCACGTAA_5	2.10294509755247	-0.029968
CGCAATCTGAATCGTGGCGTTCTA_5	2.05896125275255	-0.0273965
CTGTTGACAGCTCCTACAGCGATT_5	2.04437320972532	-0.00678136
CGGTTGTTAGGCTTCTCTCTGGTT_5	2.22710160720232	-0.00409794
ACGTTCAGTGGAGTTGGTGTTCCT_5	1.58638174696587	0.00200599939244755
CCTTGATCTAAGTGGCTCGTGGAT_5	2.16484803985546	0.0085984149800806
CCGTAAGAGAAGAGGTTCTGAGAG_5	2.29832903836062	-0.010837
ACCACGATTTACCGAGGTAGCATC_5	2.14469382278928	-0.0822402
AGAGTAGCGAACGCTTGTCTAGGT_5	1.93268448568027	-0.0428376
CGCTCTATAGTCGACATTACGGCT_5	2.15081615229412	-0.0466927
ACCACGATTCTCGCAATGGTCCTT_5	2.21869561595921	-0.0129032
GCGTCATTACTCGTTGGCGTTCTA_5	2.12799697192335	-0.000511336
ATGCACGACTGGAGTAAGGCATAG_5	1.83828319058674	-0.00459005
ATGCCTGTTGCAGGTACTAACTCG_5	2.1195012448182	-0.0134928
ATGACGTCTACGGTTGGCCAGTAT_5	2.16903154493495	-0.03522
AGCACTTCGATACTGGCTTCGTTC_5	2.1758090618055	0.0298267577472932
GTTCTCGTAGTCTGTGCGAACTGT_5	1.77103189611534	-0.00420551
TCGCTGTTAATGGACGCGAGTATG_5	2.24666564333771	0.0111209872774056
AAGCACTGCGTCAATGACTGTGTC_5	2.06175470530077	0.0750335312842081
CACTAGCTCATTGCCTGCATACAG_5	2.09696799244409	0.0181846960209671
CCTTGTAGATTCGAGGAGTCAGGA_5	2.32190321530385	-0.0282432
CGTGTGTAGTCAGTTGATTCTGGC_5	2.11083429441465	-0.0376308
ATGCCTGTCTGACACACAAGTGCA_5	2.27489008067856	-0.0595976
TAACCGGTCGACCATTGTATTGGC_5	2.31848012467246	0.00193076344748888
CGCATGATGACGAATGAGGTCACT_5	2.26509297795211	0.00954587473789098
ATCACACGAAGGACACTTGACAGG_5	2.17592543924884	-0.0128424
GCAAGATCTCGAACCAGCTTCGAA_5	2.35600430764005	-0.0467063
CGCTCTATCAATCGACTAGCCGAA_5	2.26052302026641	-0.0764352
ACGACTTGGTAGAGCAACCTTCTC_5	2.16626166366261	-0.0428415
GTCATCGAGATAGCGAGCATACAG_5	2.01637879090753	-0.0443641
CGCAATCTGACGAATGTTCAGCCT_5	1.77974994870171	0.0654503284422182
CCTTGATCCGTCAATGCACCACTA_5	2.44076103447733	-0.0640447
GTCGAAGACTATCGCATCGTAGTC_5	2.26890201409663	-0.043022
GAAGGAAGGTCGGTAAGATCGTAC_6	1.55610617153336	-0.0772004
TGCTTCCAGAACGCTTCAGCGATT_6	1.39778246880817	-0.0168033
CAACACCTGACTTAGGCAGTCTTC_6	1.55553029688869	0.0471490801734793
AGAACGAGTGCAGGTAAACCTCCT_6	1.61615283670293	-0.0175541
AGAACGAGGTCGGTAAGATTGGAG_6	1.20483604714054	0.0323371050437305
CTTAGGACCGAGACTACTACAGTG_6	0.953270154755364	-0.0701827
ATCGATCGACTCGTTGTCTCCGAT_6	0.921272087062142	0.168857377315607
TTGGACGTACCTAAGGTCTGCTCT_6	1.67107611244085	0.0542321389544102
CTGATCGTTAGTTGCGGCTTCGAA_6	1.28509002918133	-0.0211858
ATCGATCGGACTATGCCATAACGG_6	1.68787001985537	0.101158832915021
CGGCTAATTCGAACCATCGTAGTC_6	1.14377074413047	0.0684075002664308
GAAGGAAGTACCAGGAAACCTTGG_6	1.60012236294756	0.0473338300154007
TGTGACTGTGATCGGAAGGATGGT_6	1.36740748237915	0.1344636099019
GAGCAGTACTCAGAGTCAAGGTCT_6	1.47889481481739	0.175549778045069
GTCATCGATCTAACGCCTTCGTTC_6	1.42767646131017	0.0362786289744251
CACTAGCTGAGATGTCTAGCCGAA_6	1.90558816909839	-0.0546882
GAAGTTGGGCCATAACTAGCCGAA_6	1.34627968385226	-0.00593216
CCTTGATCTTGGTGAGACCATGTG_6	1.66046145808577	-0.0207264
TGCTTCCACCAAGTTGAACCTTGG_6	1.39331639128506	-0.0711152
CTGATCGTGTCAGTTGACGTCGTA_6	1.49493935444828	-0.0723375
ACTCTCGAAATGGACGTGTCCAGA_6	1.76542289151445	0.131467021354022
TACGCCTTTACCAGGATCCGAGTT_6	1.23773197985606	0.0204071207320026
TTCGTTGGCTAGGTGAATTCTGGC_6	1.7258511167664	0.00277380494434068
GTGCCATACAACCTAGGCTTAGCT_6	1.38727018637277	-0.0303569
CGCATGATACATTGCGGTCTAGGT_6	1.5681208634431	-0.0805384
ATCCAGAGAGCTCCTATTCTCTCG_6	1.61831712430073	0.0664856840457092
CGCATGATACCTAAGGCCTTCCTT_6	1.27552950265505	0.0237952292819684
TACGCTACATCGGTGTACATAGGC_6	1.87883967808321	-0.0218819
CGCAATCTCATTGCCTCAGTCTTC_6	1.47260806116258	-0.0301722
ACGGAACACAGTTCTGTGCACCAA_6	1.3918472247108	-0.0295633
CCTTGATCCAGAATCGAGTCAGGA_6	1.09031536422729	-0.121403
GTAGGAGTACGTGATGCAAGTGCA_6	1.43814071623903	-0.0400091
TGTGACTGCATTGCCTTTGACAGG_6	1.34640833155024	0.0870466945726103
CGTGTGTATGCAGGTATGCCTCTT_6	1.29992741990001	0.0263084384839578
GATGTGTGCAATCGACGCTTCTTG_6	1.33479600225536	-0.00739177
AAGCACTGGTCCTAAGTTGTCGGT_6	1.90692130818937	0.207813989000939
TACGCCTTAGTCTGTGCGAGTATG_6	1.54557638160897	0.0335312360110628
TGCTTCCACTCATTGCTTGACAGG_6	1.22939999770565	-0.0130384
GTCATCGACGCTAGTACATGGAAC_6	1.47819208785416	0.000804912579001865
CTTGTCGACGATAGAGTGCGTAGA_6	0.766761705210096	-0.0748043
TTGCAGACGAACGCTTTTCAGCCT_6	1.77823960837274	-0.0148394
CTGATCGTCTAGGCATTTGTCGGT_6	1.27185967902504	0.0200784102904842
GATTACCGTGAGGTGTTGCACCAA_6	1.79286350354756	0.0310793014309077
GTGCCATAAGTGCAGTCAGCGATT_6	1.12193681335089	0.0965990603511679
GTGAAGTGCCAAGTTGACTGTGTC_6	1.29067344514998	0.00523129614502521
GCTATCCTTGTGCGTTAACCTCCT_6	1.72558381899287	0.100197160296236
GATCGAGTATCGGTGTGCATACAG_6	1.3618476886289	-0.0577032
CGCAATCTCGTACGAACTAACTCG_6	1.55697032727705	-0.0620388
ATCGATCGCTGGAGTACGTGTACT_6	1.44112626906457	-0.147469
AAGCACTGCGACCATTCAGTCTTC_6	1.60874706344783	-0.0988233
ATGACGTCGCCTTGTTTCAGACGA_6	1.54953141441534	-0.0112252
CTTCGACTCAACCTAGATGGAAGG_6	1.20140335308128	-0.0413629
CGCTCTATAGCTCCTAACCTTCTC_6	1.39978528251445	-0.00973403
GAACATCGGCCTTGTTAACCTTGG_6	1.26705769385313	-0.0437391
GATCGAGTTGTGCGTTCAAGGTCT_6	1.95605588179021	0.029036887087566
CTTCGACTGCTCTGTACAGGTATC_6	1.61919736161055	0.086611110313117
GAGCAGTATACATCGGAGGATCTG_6	1.57114983461837	-0.000396903
GATTACCGGACTATGCATGGAAGG_6	1.74125032625955	0.055987382244141
TCGCTGTTGATACTGGGACAAGAG_6	1.23785680712576	0.18832599014975
CCGTAAGAAGGTTCGATCCGAGTT_6	1.51630178733733	-0.0568988
GATGTGTGTCTAACGCCGAACTGT_6	1.90720630007163	0.0435109537540931
CGCTCTATCGATAGAGCAAGGTCT_6	1.27599201181245	0.0823400769232381
ACGACTTGGATGCACTGCTTAGCT_6	1.69399189104017	-0.0554897
ACCACGATCTCTACTCATTCTGGC_6	1.6671274496908	-0.0822024
GATAGGCTCGCTAGTAAGGCATAG_6	1.47156208656817	0.102988226563949
GATTGCTCGAATCGTGCACTGACA_6	1.41322904020425	0.0246524185195972
GTGAAGTGTTGATCCGGCTGTTGT_6	1.75228373441061	-0.0216777
ATGACGTCCATTGCCTCAAGGTCT_6	2.27059845108788	-0.0508593
CCTTGATCTACATCGGTAGGATGC_6	1.02066295121002	0.0419304234476597
ACTAGGAGGCTCTGTACCATACGT_6	2.35925450399177	-0.0644392
TGTGACTGCTATCGCATGCCTCTT_6	2.24624627078892	-0.0252412
GTGCCATAGAAGAGGTCATAACGG_6	2.25891110960643	-0.00292227
GTAGGAGTAGGCTTCTGCTGTTGT_6	2.48139712207045	-0.0186908
GAGCAGTATTGATCCGAACTGGTG_6	2.40998818624349	-0.0373003
ACGGAACATTGGTCTCTACACGCT_6	1.5842758377106	0.00498658333449785
GATTACCGTACATCGGACTGTGTC_6	1.88292137851123	0.10758824613557
GATCGAGTTGCCATTCTCTGAGAG_6	2.35710330586364	0.0276923730732276
AGTTCGTCTAAGTGGCTTAGGTCG_6	2.31375007140549	-0.041615
ATCACACGTTGGTCTCTCGTAGTC_6	1.77872750796198	-0.0812571
TTGCAGACGTAGAGCAAGCAGATG_6	2.32750114286574	-0.0970777
TAACCGGTGAAGAGGTCGATGCTT_6	2.57602526580278	0.0519756085662968
AACTGAGCGTCGGTAATGTCCAGA_6	1.79308966086304	-0.0832488
CTTCGACTACGATGACACAGCAAC_6	2.54338149398487	-0.0706475
CTTGTCGACGAGACTATCTCCGAT_6	2.17251142298258	-0.0551141
GTGCCATAAATGCCTCCATGGAAC_6	2.37148584055383	-0.0563199
GATGTGTGACCTAAGGCATCTACG_6	2.23995247817562	0.0130273817030484
AACGTCTGTTGGTGAGCTACAGTG_6	2.38393242766939	-0.0295854
AGCACTTCTTCAGGAGTCTGAGAG_6	2.59273236701245	-0.0639234
CCGTAAGATGAGGTGTCGAACTGT_6	2.13856266822628	0.0114967473113436
GAATCCGAGTATGCTGTCGAGTGA_6	2.57696559061838	0.0165065152022392
AACCGTTCATCGGTGTAAGAGCCA_6	2.40589371659307	-0.0880593
CTGTTGACAGTCGACAGTATTGGC_6	1.74156719291008	-0.0643023
GACGATCTTGTGCGTTGCATACAG_6	2.17852211999289	-0.0536996
GAGACGATTACCAGGAGTGTTCCT_6	2.2368677905235	-0.0663887
TACGCTACCGACCATTGCTGTTGT_6	2.2943438089922	-0.0240768
GTCGAAGAATTCGAGGCGGAATAC_6	2.24511640715039	-0.0579963
CGGTTGTTCTCATTGCGCTTCGAA_6	1.95479966213554	-0.0287036
CAATGTGGAAGGACACTCAGACGA_6	2.11373043087257	-0.0379317
CGCAATCTCTCTACTCTGCACCAA_6	2.20435521496767	-0.0411715
CATGGCTACCGACTATACCATGTG_6	2.16742773824663	0.00474532253374671
TACGCCTTTCGAAGGTCGTAGGTT_6	1.94111756578441	-0.0148278
GCTATCCTGTCGGTAATTCTCTCG_6	2.06495579216762	-0.0074588
GAATCCGACATTGCCTCTGGTTCT_6	2.29196031855181	-0.0261445
ATGACGTCTACCAGGAACTGCTAG_6	2.28013493467021	-0.0187363
GTGCCATAGTCAGTTGCAGGTATC_6	2.12248671992789	-0.0797259
AGTGGATCCAACCTAGCTCAGCTA_6	2.41563725850929	0.0600686699454396
ACGACTTGGACTATGCCATGGAAC_6	2.28844	-0.00453575
CCTTGATCACCAATGCCTCTGGTT_6	2.2938227587951	-0.0699332
CAATGTGGCTCAGAGTCAAGTGCA_6	2.39260353024017	-0.0392735
CTTAGGACAGTCTGTGACATAGGC_6	2.44740871849542	-0.0815225
CTTCGACTGTCGGTAAGAGCTCAA_6	2.4435282278004	-0.0484588
GTTACGCATACCAGGAGTCTAGGT_6	2.41876302453041	-0.0136029
ATATGCGCGATACTGGAACCTTGG_6	2.05831608527193	0.0272298181863718
GTAGGAGTGTCTCCTTTGCGTAGA_6	2.13295	-0.0393449
TGGTACAGTGGAGAGTCGTGTACT_6	2.24653957490897	-0.0209446
TAACCGGTACATTGCGCCTTCCTT_6	1.92918476301136	0.0241071628306257
AAGCACTGTGTGAAGCTCGTGGAT_6	2.13407254508871	-0.0219655
TGGTACAGCCAAGTTGGTATTGGC_6	2.37205430344482	-0.00867525
CTGATCGTCTCATTGCCGAACTGT_6	2.1372636114108	-0.0286289
GAACATCGCGTCAATGCATGGAAC_6	2.52202631594976	-0.0512736
GATTACCGCAATCGACTCAGACGA_6	2.49762742878033	-0.0702883
GATAGGCTCAGAATCGGCGTTCTA_6	2.51753654951688	-0.0296635
GTCGAAGAGACTATGCAACCTTGG_6	1.95256538844581	-0.0249403
GAGCAGTACAACCTAGGCGTTCTA_6	2.39426059233567	-0.0819014
TAACCGGTCGATAGAGTGCGTAGA_6	2.23444174420585	-0.0347677
ACTAGGAGCACAAGTCCGTAGGTT_6	2.50427120787662	-0.00420639
AACGTCTGGAACGCTTTCGTGGAT_6	2.16113239570189	-0.00895783
ATCCAGAGCGTACGAAGCTTAGCT_6	2.0952699156704	-0.064858
TGGCATGTCATTCGGTAGGATGGT_6	2.2347763540219	-0.00350011
GATTACCGTACATCGGTCGACATC_6	2.55873089700965	0.00132724973240042
GTTGACCTCTGGAGTATCGTGGAT_6	1.9350090474801	-0.0154575
GAAGGAAGGCCATAACGCATACAG_6	2.33152238145773	-0.00782013
AGAACGAGGTAGAGCACACTGACA_6	2.12688773916671	-0.0609622
GATCGAGTACATTGCGAACCTCCT_6	1.87488775303805	0.0216160026457913
TCAGGCTTGAAGAGGTCAGGTATC_6	2.1991737184103	0.013383177447937
CCGTAAGATTACCGAGGCTTCGAA_6	2.26600988074435	-0.10956
CGGCTAATAGGTTCGATGCGTAGA_6	1.87377811046263	0.0421150566649967
ACAGCTCACTCATTGCAGGATGGT_6	2.52630775319719	-0.0855226
GTTACGCACTATCGCACCTTCCTT_6	2.28955189412083	-0.0398086
AGTTCGTCTGGAGTTGAGGATCTG_6	2.12012353673369	-0.0428692
CAGTCCAACATTCGGTGCGTTCTA_6	2.45726936716639	-0.0289611
GAATCCGATACATCGGCAGTCTTC_6	1.9561917794641	-0.0244207
ATCGATCGCAGTTCTGCAAGCAGT_6	1.8864395850337	0.0451618531806183
CGCTCTATACTCGTTGTAGGATGC_6	2.13880600076041	-0.0334035
CGACGTTAAGTCTGTGTGGTCCTT_6	2.10063564771258	-0.0429476
GCAAGATCCAATCGACTTCAGCCT_6	1.8522385003486	0.0456433513833994
ATCCAGAGGTCGGTAATCCGAGTT_6	2.14759974059636	-0.0734663
ACGGAACATAAGTGGCGTTCATGG_6	2.21882620219002	-0.0291545
CAACACCTAGCTCCTATGCACCAA_6	2.39468231098738	-0.0333046
TGGTAGCTATTCGAGGCAGGTATC_6	2.20252188683415	-0.0152014
AGCACTTCGCCTTGTTAACCTCCT_6	2.29844905521079	-0.0331314
GAAGGAAGCGACCATTCACTGACA_6	1.91842506806029	0.0463480645260344
GAGACGATGAATCGTGGCATACAG_6	2.45622459231488	-0.053637
TACGCTACGCCTTGTTTTCTCTCG_6	2.09670021714998	-0.0741201
ATCCAGAGTCTAACGCGCTTAGCT_6	2.38495821594246	-0.0424081
ATCCAGAGGTCGGTAAAAGAGCCA_6	1.91891419096323	-0.0222947
TGCTTCCAAATGCCTCAACCTTGG_6	2.30835010927846	-0.0308549
CAATGTGGCAGTTCTGCTCAGCTA_6	2.45555664347013	-0.0634332
ATCGATCGAGGCTTCTCCAGTGTT_6	2.25842377636095	0.00572432860244101
TATCGGTCTGTGCGTTGCTTCTTG_6	2.25928494555032	0.0115630912417276
AACGTCTGGCCTTGTTTACACGCT_6	2.48167587134153	-0.0652351
CTGATCGTGACGAATGGTATTGGC_6	2.37786755429018	-0.00454759
CGCAATCTTGGAGTTGTCGTAGTC_6	2.55518524660073	-0.0530873
TGAGCTAGTCGAAGGTGCGTTCTA_6	2.20123298911775	0.00691409708387145
GCGTCATTTACGGTTGAGTCAGGA_6	2.34010790906348	-0.0502455
CACTAGCTCGGATTGACCAGTGTT_6	2.36586487103308	-0.00243672
GAGCAGTATCTCGCAAACCATGTG_6	2.14624359170671	-0.0461554
TTGCGAAGTCGAACCAACCGCATA_6	2.21411606783714	-0.0212462
CAACACCTCTTGCTGTCGATGCTT_6	2.15305880373177	-0.0253537
GAAGTTGGAGCTCCTATCTGAGAG_6	1.85913495496865	-0.094764
CCGTAAGAACCTAAGGACCGCATA_6	2.49397728550676	-0.0548087
ATGCCTGTTCCGTATGCTGCGTAT_6	2.39032719421196	-0.0541179
GCGTCATTGTCTCCTTCATGGAAC_6	2.18196052690778	-0.0256732
CCTGATTGTCTAACGCTCACGTTC_6	2.39483003276063	-0.0220234
TGAAGACGAATGCCTCACAGCAAC_6	2.45092454275886	-0.0442161
ACGACTTGGTCGGTAACTTCGTTC_6	2.56733922237799	0.00583098718066492
GAGCAGTAGCCTTGTTAGGCATAG_6	2.47217331080542	-0.0496995
GCACAACTACATTGCGTTGTCGGT_6	2.45844211629883	-0.0150417
ATCCAGAGAAGGACACATGGAAGG_6	2.24881819958492	-0.039799
TGAAGACGCCAAGTTGAGCAGATG_6	2.16609616334298	-0.0548692
CAACACCTACCAGCTTGTTCATGG_6	2.41086354474839	0.0429212512988595
TTCGTTGGCTCAGAGTACCGCATA_6	2.12481115493869	-0.0221876
CACTAGCTAATGGACGCGGAATAC_6	2.51466163857706	-0.0608506
CGTGTGTACTTGCTGTACCGCATA_6	2.42491629225644	-0.0723824
AACGTCTGGACTATGCATTCTGGC_6	2.3144977477219	-0.0270894
GAACATCGCGAGACTATCACGTTC_6	2.40397766990724	-0.0466406
ACGACTTGCGCTAGTAACCATGTG_6	2.14712892876225	-0.0297353
GAGCAGTAACGATGACAACTGGTG_6	2.14487317241314	-0.0330408
AGAACGAGCACAAGTCCTGGTTCT_6	2.24486231583772	0.0207278530820048
AACGTCTGTTGGTGAGACCGCATA_6	2.21121354176069	-0.00499092
AACGTCTGAGGCTTCTACATAGGC_6	2.41146837805107	-0.0252472
GAACATCGTTGATCCGCCATACGT_6	2.35743375064877	-0.0481333
GATAGGCTGCCTTGTTGCAATTCG_6	2.42672544319248	-0.0392321
TTGCGAAGCTCATTGCCTGGTTCT_6	2.54946765421204	-0.0290388
CGCTCTATTTGATCCGGCACGTAA_6	2.20651435225514	0.000492014656576556
GCACAACTCTAGGTGACGATGCTT_6	2.57471918575609	-0.0420546
ACTCCATCTGGAGTTGGCATACAG_6	2.38672896513211	0.0422103742209189
CATACCACTCTAACGCAACTGGTG_6	2.38119135731303	-0.00770287
GAGACGATTCTCGCAAACATAGGC_6	2.32718930098113	-0.0322618
GTCATCGATGGAGAGTTGCCTCTT_6	2.47299401735454	-0.052706
TGGACTCTGAGGACTTAACCTTGG_6	2.46819093966024	-0.0122497
TTCCAAGGTTGGTCTCTTACGGCT_6	2.43137558253891	-0.0283021
TGTGACTGAGGTTCGACAAGGTCT_6	1.99708580440339	-0.0678559
CGTTGCAAATTCGAGGGCAATTCG_6	2.60766014752892	-0.0133579
GTGAAGTGTGCAGGTACCAGTGTT_6	2.44217308745019	-0.031438
ATGCCTGTGTAGAGCAAGGATGGT_6	2.11152101815298	-0.00219705
AACTGAGCTACATCGGGTGTTCCT_6	2.31329653499163	-0.0165288
GTGCCATACTCAGAGTCGGAATAC_6	2.26582156547023	-0.0722706
TGTGACTGCCTACTGAGTCTAGGT_6	2.36819913528297	-0.0209673
GTTACGCATCCGTATGTCCGAGTT_6	2.5259032787355	-0.0351985
GATTGCTCGCTCTGTAGTGTTCCT_6	2.28862407384382	0.0143159778382237
GCGTCATTCGGATTGAACAGCAAC_6	2.47700213605717	-0.0371134
GATCGAGTCTATCGCATCGACATC_6	2.4277733564667	0.0084890600697948
TTGCGAAGGAGATACGTATCAGCG_6	2.34404959814711	-0.0343141
AGCACTTCCGAGACTATCGAGTGA_6	2.25462092640754	-0.094289
ATCCAGAGCGAGACTACAAGTGCA_6	2.26589512303077	-0.0446456
ATGACGTCGCTGGATTCAAGGTCT_6	2.10408781099164	-0.0692394
CGCAATCTTTGGTGAGAGGCATAG_6	2.5756649100655	-0.0532853
CGGCTAATGAATCGTGAACTGGTG_6	2.05305065625426	-0.0292372
CGCATGATTCTCTAGGTGTGGTAC_6	2.17236771122598	-0.0323064
AGCACTTCTGATCGGACTAACTCG_6	2.33385070280845	-0.0714599
TTGGACGTGAGATACGTAGCCGAA_6	2.16445227606203	-0.0157796
GACGATCTAGTGCAGTCGGAATAC_6	2.15158283220301	-0.043797
TGCTTCCAAGGAGGAACGAACTGT_6	2.13124702357012	-0.0726512
ATGCCTGTTCTCTAGGCGGAATAC_6	2.49080072685898	-0.0660028
GTTACGCACGTACGAATGGTCCTT_6	2.43660835110347	-0.0382997
AGTGGATCGATAGCGAAACTGGTG_6	2.29459663030724	-0.0426694
CTTCGACTGTCTCCTTCTTCACCA_6	2.40509916345848	0.00433305775465093
TACGCTACCCAAGTTGGCTTCTTG_6	2.29824585538391	-0.0648888
TGTGACTGGAAGAGGTACGGTCTT_6	2.50679190332044	-0.0707841
GTGCCATACTTACAGCACTGCTAG_6	2.31636178897925	-0.0466547
CGGTTGTTCGTCAATGCTCTGGTT_6	2.13654511447487	-0.0217032
GTCGAAGAGTCAGTTGCACTGACA_6	2.4291864327131	-0.0322157
GCAAGATCGAAGAGGTGCGTTCTA_6	2.0338717448226	-0.0571678
GAGCAGTAGACGAATGTCGACATC_6	2.46655438165434	-0.0319181
ATCGATCGCATTGCCTTCAGACGA_6	1.95421425866502	0.0164046018644244
ACTGAGGTACTCGTTGGCTTCTTG_6	2.55037581576963	-0.0366561
CGCTCTATACCTAAGGCGATGCTT_6	2.13455437814763	-0.0381084
CACTAGCTTGATCGGACCATACGT_6	2.46401981670171	-0.0416054
CCGTAAGACTGGAGTACAGTCTTC_6	2.35049109655293	-0.0378818
GTTGACCTTTACCGAGCAGCGATT_6	2.00694968446575	-0.0506071
TCAGGCTTCGTCAATGTCAGACGA_4	1.87839376212094	-0.0578891
TGTGACTGCTGACACAGCTTCGAA_4	1.74777553257178	0.0174874715105729
ACAGCTCATCTCGCAACAAGGTCT_4	1.59604157824239	0.298564581148029
CCTGATTGAGGCTTCTCAAGGTCT_4	1.47834438252177	0.26182313829122
CGCATGATAGGTTCGACGATGCTT_4	1.69570923372452	-0.0311445
CTTAGGACTGCAGGTAGTAGCATC_4	1.61261504398175	0.0900086536507458
ATCCGGTACAATCGACTGTGGTAC_4	1.72159074220563	-0.0012535
CGGCTAATCGTCAATGAACCGAAG_4	1.31780605442815	-0.126542
ATGACGTCCCTACTGATTGTCGGT_4	1.49434332295106	0.0121659741367565
CCGTAAGACTTGCTGTTCAGACGA_4	1.86428139848394	-0.157632
CTTAGGACAGGAGGAATCACGTTC_4	1.57254501455857	-0.0221483
GACGATCTCATTGCCTCGTAGGTT_4	1.3680803296664	0.044038718885024
TTCCAAGGCTCAGAGTACCATGTG_4	1.88087826878225	0.138723210998084
AGTTCGTCTACATCGGAACGGTCA_4	1.49728995363451	-0.0194943
ATGCACGAGAACGCTTAGGATCTG_4	1.67169593277475	-0.00366559
CATGGCTAGCTCTGTAATTCTGGC_4	1.94297640099966	0.0771820283658076
GATAGGCTGACTATGCACAGCAAC_4	1.5297840246766	0.0297350273992714
ATGACGTCCAATCGACCTTCGTTC_4	1.66220330517309	-0.0786946
CCTTGATCCCGACTATTTAGGTCG_4	1.88215088463669	-0.00983299
CGCTCTATCGACCATTCATGGAAC_4	1.64434495752523	0.00442750571782313
GAAGTTGGACGTGATGAACTGGTG_4	1.65314029772519	-0.0757715
GAGCAGTATTGGTCTCCCAGTGTT_4	1.98373694759463	-0.049757
GTTCTCGTCTCATTGCTCGTGGAT_4	1.63626826082763	0.0378179831031906
TGCTTCCAACCAATGCGCCAGTAT_4	1.74315792154867	0.00614169633051237
AACTGAGCGTCGGTAAGATCGTAC_4	1.32131324782112	-0.0214658
ATCGATCGTGATCGGATCGACATC_4	1.83318377168022	-0.102164
ACAGCTCATCCGTATGTTGTCGGT_4	1.47408044699336	0.0171196731232935
AGCGTGTTCGACCATTCACTGACA_4	1.50017817343558	0.106959176159233
TCAGGCTTTACCAGGATTCTCTCG_4	1.36644063627838	-0.0739598
ATATGCGCCTGGAGTACAGTCTTC_4	1.55226722197902	0.145764497345824
GACGATCTAATGCCTCGTATTGGC_4	1.91315428917303	0.0539403469284403
TACGCCTTCTAGGTGAACGTCGTA_4	1.7054531875564	0.105790832600645
CGGCTAATTCGAACCACCTTCCTT_4	1.83451599133775	-0.0301039
TACGCCTTAGGAGGAATAGCCGAA_4	1.75648646391204	-0.0138276
TTGGACGTGAGGACTTTCTCCGAT_4	1.85272328230303	-0.000190096
AAGCACTGCGATAGAGACTGCTAG_4	1.9738643109131	0.0199903469714757
CGCATGATTGGAGAGTTTCTCTCG_4	1.83843447225298	-0.018951
GAAGTTGGGTCGGTAACGATGCTT_4	1.86988637060981	-0.0587245
GACGATCTGTCAGTTGCCAGTGTT_4	1.77527027993788	-0.0475621
TTGGACGTGAAGAGGTTCTCCGAT_4	1.86307419422057	-0.0632314
ATGCACGATCCGTATGTGCACCAA_4	1.56588656728289	0.0300270061857134
AGTTCGTCATGGTTGCCGATGCTT_4	1.71390753024029	0.0257583483114598
TGGTACAGCGTCAATGGATCGTAC_4	1.42311553289046	-0.109808
CGTGTGTAGAGATACGTCGTAGTC_4	1.68030454453969	0.0333954184801001
GAGACGATTGTGCGTTCCTTCCTT_4	1.90747305444327	0.0353392887864575
GATGTGTGATTCGAGGCAGTCTTC_4	2.0131237371527	-0.0528725
GATTGCTCGTAGAGCACTGCGTAT_4	1.8045499923661	-0.0157824
ACAGCTCAAAGGACACCCATACGT_4	1.97233216015944	-0.102269
TCGCTGTTCTCATTGCTCACGTTC_4	1.83516926247232	0.034527622940838
GATGTGTGGAGATGTCTCGTGGAT_4	1.68266489538834	0.0953914299188833
ACGTTCAGAGTGCAGTGACAAGAG_4	1.76801651069537	0.0346921887928686
ACTCTCGAGAAGAGGTACCATGTG_4	1.57882989332021	0.154855907266068
CAACACCTAGGTTCGACATGGAAC_4	1.72272505919683	0.0888584249290246
TCAGGCTTGCCATAACTCTCCGAT_4	1.90422086217851	-0.049489
CGCATGATTCTAACGCAGGATGGT_4	1.71726511196259	0.00132545133674972
CTGTTGACACCTAAGGACTGCTAG_4	1.57945609272797	0.000330017038199348
GATCGAGTGACGAATGTGCACCAA_4	1.68802971673019	0.0128151653556603
TGAGCTAGGATAGCGATGCCTCTT_4	1.97159964604293	0.123665307770596
TTGGACGTCCTACTGATTGACAGG_4	1.52416968928105	0.0390610318204228
ATGCCTGTCATTGCCTGTGTTCCT_4	1.97998057174732	0.0396102418296017
GTCGAAGACTGGAGTATCTGCTCT_4	1.65853688435857	0.036896301600492
ATCCAGAGACCTAAGGCAAGTGCA_4	1.80446354342777	-0.0580035
ACAGCTCAAATGCCTCCATGGAAC_4	1.92179276104826	-0.00809674
AGTGGATCAGCTCCTATATCAGCG_4	1.88922839817533	-0.0658016
ATATGCGCAGTCTGTGTCAGACGA_4	1.88859579275331	-0.0827055
GTGCCATAGACGAATGCGATGCTT_4	1.86529741521896	0.0774687217407019
TACGCCTTCTCATTGCACGTCGTA_4	1.99930152366594	-0.0383184
ACTAGGAGCTCTACTCAGCAGATG_4	1.59707763983882	0.00339752026682691
GTCATCGAACGATGACGCTTAGCT_4	1.7381825585253	0.082626398316384
CTGATCGTGATAGCGAAACTGGTG_4	1.85324394901688	0.0408153503117055
ATGACGTCCTTGCTGTTGCCTCTT_4	1.36701941083649	0.0354059337905278
CATGGCTAGTCCTAAGAAGAGCCA_4	1.70521993426157	0.0842115733246772
TCAGGCTTTCTCTAGGACCTTCTC_4	1.41843380608961	0.0170850695721761
TTCGTTGGGTCTGATCACAGCAAC_4	1.67706624486669	0.0526037522216111
ATGACGTCACATTGCGCATAACGG_4	1.72436521531462	0.105048386490929
ACAGCTCATGATCGGACGTGTACT_4	1.75301926973075	0.0319268664372403
CATGGCTAATTCGAGGGCGTTCTA_4	1.69258922704839	-0.0269198
CCTTGATCTGGAGAGTTCCGAGTT_4	1.90209404986398	-0.113999
CGTTGCAAACTCGTTGTGTCCAGA_4	1.8772910740379	-0.056613
GTTGTTCGCGGATTGAGCCAGTAT_4	1.7706413242212	0.0261027729974061
TTGGACGTGAGATACGTTAGGTCG_4	1.93855233747132	-0.00408087
AGAGTAGCGCTGGATTTTGTCGGT_4	1.73255991700982	-0.0342242
CCTGATTGACATTGCGAAGAGCCA_4	1.34318687514242	0.0136442724016549
CGTGTGTACTCATTGCCAAGGTCT_4	1.85699494125141	-0.0976529
ACAGCTCAAGGCTTCTTAGCCGAA_4	1.39547093337002	0.0233982638745256
CTTAGGACCGACCATTTCCGAGTT_4	1.94191817140544	0.0793614606125792
AAGCACTGGCCATAACAGGATCTG_4	1.81713316104584	-0.0135801
AGCACTTCCTGACACATGTGGTAC_4	1.81160472290913	0.0390955230209365
CAGTCCAATCCGTATGTGTCCAGA_4	1.4434864196127	-0.0552564
GAAGGAAGGATGCACTAGGATCTG_4	1.89233811753787	-0.0603965
ATCACACGGAATCGTGAAGAGCCA_4	1.49961825326008	-0.0665257
CTTGTCGACGACCATTTCGTGGAT_4	1.95272792779042	-0.112887
GAGACGATTCCGTATGCCATACGT_4	1.76202028078441	0.0371211715299364
ATGCCTGTTCTAACGCAGCAGATG_4	1.89798452384634	-0.0651247
CGTGTGTAATCGGTGTGCGTTCTA_4	1.92743321407712	0.0976097718557284
GATTGCTCTCTCTAGGTACACGCT_4	1.80147944442808	0.0275191165295826
CATGGCTATCTCGCAATCGACATC_4	1.2705002969065	-0.0155885
AGAGTAGCAAGGACACTGCCTCTT_4	2.00156319640658	0.214864966233737
ATGCCTGTTGTGCGTTACCTTCTC_4	1.88218297854339	-0.0501897
CAATGTGGGACGAATGCAGGTATC_4	1.53076288232837	0.0950261861803418
CGCATGATCTAGGTGAATTCTGGC_4	1.77326549463023	0.0310102565934648
CCTGATTGTCTAACGCTGCGTAGA_4	1.71829316455183	-0.0172341
GCAAGATCTTGGTGAGACAGCAAC_4	1.88452948828345	0.0991612664643328
TTGGACGTGAGATGTCAAGGCTGA_4	1.35294594684708	-0.131511
CTTCGACTCGCTAGTACCTTCCTT_4	1.59790017428875	-0.129794
ACCACGATCTATCGCACGTAGGTT_4	1.83330914644629	0.0228990119546005
AGAACGAGTGCCATTCAGTCAGGA_4	1.76585692813027	0.0985408631347991
AGCGTGTTCTCTACTCCTTCGTTC_4	1.94400941786742	-0.0624655
AGTTCGTCAATGGACGAGGCATAG_4	1.97180767722055	-0.0320549
TCAGGCTTCCGACTATGACAAGAG_4	1.52907102619284	-0.075064
AACTGAGCCTGGAGTAATTCTGGC_4	1.73758236057498	-0.0786016
CACTAGCTCATTGCCTACCTTCTC_4	1.7160903814269	0.083210333796385
GTTACGCATGCAGGTATTACGGCT_4	1.60985328024223	0.0315503366220112
CGTTGCAACTTGCTGTCACTGACA_4	1.91400397503447	-0.0479204
GATCGAGTCGTCAATGCCTTCCTT_4	1.62508707300035	-0.0711553
GCACAACTAAGGACACTTGACAGG_4	1.86824931380262	-0.123622
ACGGAACAAATGCCTCCAAGTGCA_4	1.68944950129042	-0.0168722
CCTGATTGGTCTGATCTTGTCGGT_4	1.97971246236625	-0.0386588
AACCGTTCGTAGAGCACTACAGTG_4	1.87108281473846	-0.161349
ATCGATCGACTCGTTGCTTCGTTC_4	1.8013595712246	0.0851151501880104
GCTATCCTGAGGACTTACCGCATA_4	1.88760865932425	0.0463234140199909
GTTGACCTAATGGACGTATCAGCG_4	1.73685151501958	-0.063902
GAAGTTGGGTCTCCTTCCATACGT_4	1.88816077222614	-0.0475242
GTGAAGTGATCGGTGTCTTCACCA_4	2.08426014847704	0.0128820839983948
ACAGCTCATCTAACGCGCACGTAA_4	1.77288808121169	0.086736069528145
GTCATCGAAAGGACACGCACGTAA_4	1.91042356593829	-0.109503
ATGCCTGTTTACCGAGTCCGAGTT_4	1.72995595658397	0.0964267562273115
AGCACTTCAGGTTCGAACTGTGTC_4	1.84084995089172	0.0496399743486857
CACTAGCTTCGAAGGTACCTTCTC_4	1.93164123214802	0.029560067683698
GCAAGATCCGAGACTAGCATACAG_4	1.84916209455254	0.0580072716514363
GTAGGAGTTGAGGTGTATTCTGGC_4	1.92471272756476	0.00634579792661816
ACTCTCGAAGTGCAGTAGCAGATG_4	1.5477898352232	0.0676292946352565
TACGCCTTTCCGTATGTCTCCGAT_4	2.05796271273181	-0.0587056
AACCGTTCGTCGGTAACCAGTGTT_4	1.69642625748137	-0.0318374
ACCACGATGATGCACTACGGTCTT_4	1.84050724360864	-0.0222955
CAATGTGGCTTACAGCAAGGCTGA_4	2.21815729733068	-0.00799939
TGGTACAGGTCTGATCCATGGAAC_4	1.82523767510805	0.0719113280881534
ACAGCTCACATTCGGTAACGGTCA_4	1.72382004915586	-0.0175102
GTGAAGTGTGATCGGACATCTACG_4	1.73226136299231	0.0346152988600993
AGCACTTCAGGAGGAACTAACTCG_4	1.96042759918239	0.0381787765187785
CGGTTGTTCCTACTGATAGCCGAA_4	1.72190126064985	-0.0226646
CGGTTGTTAATGCCTCTCACGTTC_4	1.40114647103119	0.0465910111354971
TCGCTGTTCTTGCTGTTCTCCGAT_4	1.56514861451238	-0.0546226
ATGCACGAGTATGCTGGCAATTCG_4	1.90488140110473	0.0299162769917342
GAGACGATGATAGCGAACCTTCTC_4	1.79807214637377	-0.16834
TACGCCTTCATTGCCTCTCAGCTA_4	1.57661932100035	0.188577255013154
TTCCAAGGGACTATGCAAGAGCCA_4	1.88527235783533	-0.164532
ACTCCATCCTCATTGCGATTGGAG_4	1.90712168692834	-0.0371207
CAACACCTCATTGCCTTAGGATGC_4	1.87467620551428	-0.0529802
TACGCCTTTTACCGAGAACTGGTG_4	1.88446033769112	0.179375230902119
ACCACGATCGATAGAGGCCAGTAT_4	1.82430985058094	0.0958501816788027
ACAGCTCAAGTCGACACACTGACA_4	2.02106910261363	-0.0165554
ACTGAGGTGTCTGATCGCTTCGAA_4	1.65932433116777	-0.0667464
CATGGCTACTAGGTGATGCGTAGA_4	1.72335759039878	-0.00925894
TGCTTCCATCTCGCAACACTGACA_4	1.31083918560191	0.00738282549665698
CAACACCTCTCATTGCTGCACCAA_4	1.86999112241272	0.0245121731061345
GTGAAGTGGAACGCTTATTCTGGC_4	1.55243328625963	0.0659372025080963
TGGTAGCTACTCGTTGACGGTCTT_4	2.11686997893398	-0.0199215
AGAGTAGCTGCCATTCTGCACCAA_4	1.79370316185219	-0.16755
ATGCACGAGACGAATGCATAACGG_4	1.8374902595931	0.0379839534225911
TTGCGAAGTGATCGGAGCAATTCG_4	2.04477139678604	0.0902996983453435
ATCCAGAGAGTCGACACGATGCTT_4	1.38781194978221	0.0216929995834471
CAATGTGGCTCAGAGTTGTCCAGA_4	1.91645598363376	-0.0246181
AACTGAGCTGATCGGACAAGTGCA_4	2.02035622866559	-0.151806
ACTCTCGATCGAACCAAGTCAGGA_4	1.31815937405511	0.038199034395722
CGGTTGTTCGATAGAGTGCACCAA_4	1.68834561084496	-0.00136759
CGGTTGTTTGGAGTTGTTGACAGG_4	1.33383146334811	0.0736635323097828
GATTGCTCCTCAGAGTCGTGTACT_4	1.75451832671351	0.0295196852329239
GAGACGATCTTACAGCAAGAGCCA_4	1.7672282058345	-0.0758063
ACGACTTGTTACCGAGACCTTCTC_4	1.80484672973463	-0.0738342
GAACATCGAGTGCAGTCGAGTATG_4	2.05927898017562	-0.0144583
TGGTACAGTCCGTATGCATAACGG_4	1.80015918540489	-0.112356
TTGCGAAGGCCTTGTTTGCACCAA_4	1.81795029868063	-0.0614875
CCTTGATCTCGAACCACGATGCTT_4	1.77783748476262	-0.0537927
TTGGACGTCTTACAGCACCGCATA_4	1.95122208770348	0.0819256619858356
GATCGAGTAGAAGCGTCGTAGGTT_4	1.72739880363528	-0.122555
ACTCTCGACAGAATCGCAGTCTTC_4	1.63848619165871	0.0354774065952921
ATGCACGATACATCGGTTGTCGGT_4	1.93064814386124	-0.0490371
TCGCTGTTCTTGCTGTCTGGTTCT_4	1.95979066488732	-0.0268719
CGGTTGTTATCGGTGTGTCTAGGT_4	1.9579443354437	-0.0222659
GAAGTTGGATTCGAGGTATCAGCG_4	1.64860870073987	-0.125741
GATAGGCTCTAGGTGATGTGGTAC_4	1.71797551305705	-0.0712135
ATGCACGAAGTGCAGTTCTGCTCT_4	1.90510444643962	-0.0661706
TTCCAAGGGAAGAGGTCAAGCAGT_4	1.89168101378036	0.0784174957384949
TACGCCTTCGAGACTAACCTTCTC_4	1.70024768682403	-0.102039
CCTTGTAGTGTGAAGCTCGAGTGA_4	1.79215607261535	0.0516186033571299
ATCCGGTACCGACTATCATCTACG_4	1.73892436466896	-0.0782168
CCTTGTAGGACTTAGGTGCACCAA_4	1.87797642724147	0.0382662603586683
CTTAGGACTGATCGGATTAGGTCG_4	1.55288497585828	0.0797028459996502
GAAGGAAGGCCTTGTTAACCGAAG_4	2.01879566367935	-0.0428172
ACCACGATGTATGCTGACCGCATA_4	1.67304665878635	-0.11683
GTTGTTCGACCAGCTTAACCTTGG_4	1.64127823952731	-0.0339465
ACAGCTCATGCAGGTACACTGACA_4	1.94535388507192	0.0305153466419237
ATGCACGACTCTACTCAACCTCCT_4	1.43176903905632	0.0397506349938722
ATGCACGAACCAATGCTTACGGCT_4	1.53223968710086	-0.069428
GCAAGATCGTAGAGCACAAGCAGT_4	1.8433372402508	0.0472582666925469
ATGCCTGTTGATCGGACGTAGGTT_4	1.67025154088938	-0.07359
GCGTCATTTTGATCCGACGGTCTT_4	1.78943610978817	0.107286076958186
GTGCCATACTGACACATAGCCGAA_4	1.92149709096441	-0.02432
TGGTACAGCCTACTGATTACGGCT_4	1.67958332824275	0.106019504660753
ACTGAGGTCGGATTGATTCAGCCT_4	1.93903772102332	0.0303867455097276
TGAGCTAGAAGGACACCCTTCCTT_4	1.86413885346277	0.0251238989240246
CGCATGATCGTTATGCTAGCCGAA_4	1.60469520443918	0.0199661063079261
TGCTTCCAGATACTGGCTAACTCG_4	1.39794381160544	-0.0854866
ACCACGATATTCGAGGGCGTTCTA_4	1.86696287710477	-0.0218842
GAGCAGTAATGGTTGCTCAGACGA_4	1.99154002365916	0.0791975374220966
ATCGATCGTGGAGAGTTCGTGGAT_4	1.33672193138747	0.0169351115413588
GTTCTCGTCATTGCCTGCTTCGAA_4	1.80281966645981	-0.0213408
TGCTTCCACAACCTAGTGTCCAGA_4	1.80606334823171	0.0218057416144495
TGGACTCTGCCTTGTTGCTTAGCT_4	1.39920328501757	0.221648055792938
GAGCAGTATCCGTATGACGTCGTA_4	1.49824228534391	-0.169224
GTGAAGTGGATGCACTCAGGTATC_4	1.96778154248106	-0.155709
ACTCCATCACGTGATGGTATTGGC_4	1.8180020934021	-0.0106626
CAACACCTCCAAGTTGAAGGCTGA_4	1.48428515132778	0.0742476084922597
CAGTCCAAGAGGACTTTGTGGTAC_4	1.86722469837892	0.0570107452208863
CGTGTGTACAACCTAGTAGGATGC_4	1.74334804714651	0.0260030711255207
CTGATCGTATTCGAGGGCGTTCTA_4	1.7362332087568	0.0426034034581336
ATATGCGCCGACCATTCTGCGTAT_4	1.8838522879732	-0.0655468
GATCGAGTCGACCATTAGGATGGT_4	2.0031645331417	-0.0664742
TCAGGCTTTCTAACGCACCATGTG_4	1.47954953846733	0.0840099408050392
CGCATGATGAAGAGGTGCACGTAA_4	1.81997721547832	-0.102117
CATGGCTATCTAACGCCTGGTTCT_4	1.62656351011192	-0.0300842
CCTTGATCCTTGCTGTTACACGCT_4	1.68715191969191	-0.174015
CGCATGATAGTCGACACAAGTGCA_4	1.74995591217593	0.0637614929529292
TACGCCTTTTGGTGAGAACCTCCT_4	1.70544403688025	0.055623980682232
AGAGTAGCATTCGAGGAACTGGTG_4	1.77945691193612	-0.0316489
CGTTGCAACTCAGAGTGCTTAGCT_4	2.04185345114371	-0.0319558
GATTGCTCTACCAGGAGTTCATGG_4	1.58644037688543	-0.063205
CTTAGGACTTGGTGAGTCAGACGA_4	1.99373836071754	-0.0178261
AACTGAGCTGTGCGTTTCGTAGTC_4	1.81994476032309	-0.0744668
GAAGTTGGGTCAGTTGAACGGTCA_4	1.82485256434193	0.188746092328373
GATTGCTCCTCAGAGTCTAACTCG_4	1.92820668446505	0.0555675827466929
GTGCCATAGAACGCTTGCTTAGCT_4	1.99643777249817	0.0233929166836042
ACTCCATCGAGGACTTCTACAGTG_4	1.54378909944451	0.171599478323828
GCTATCCTTCTAACGCTCTGCTCT_4	1.89233634515384	-0.10641
TGGACTCTAATGCCTCTCTGCTCT_4	1.92598366638787	0.0747958300705445
GTTGTTCGTTACCGAGTCCGAGTT_4	1.86055039957433	-0.0983807
CTGATCGTCAATCGACCGAACTGT_4	1.73457684387105	-0.0758973
TTCCAAGGAGGTTCGACCAGTGTT_4	1.9838700292489	-0.0652309
ATATGCGCCTATCGCACAAGCAGT_4	1.9695780216632	-0.0185157
TATCGGTCTCGAAGGTCGTGTACT_4	1.85101841165762	0.00568944736030291
CGTGTGTAACCAATGCAACTGGTG_4	1.79211408206244	0.0303543253944674
TTGCAGACCTATCGCATTCTCTCG_4	1.94358028502925	-0.0185116
TGTGACTGGTCTCCTTCAGCGATT_4	1.89250149347971	0.0809141012956445
CAGTCCAAGTCGGTAATCGAGTGA_4	1.69233482200199	-0.0700306
GAACATCGGTCTCCTTTAGCCGAA_4	1.79054776890608	0.0235155891067776
GTTGACCTTCTAACGCCAAGGTCT_4	1.5638038534496	0.0427902429901556
ACAGCTCATGATCGGAGACAAGAG_4	1.8862282286481	-0.151903
AGTTCGTCCAACCTAGTTAGGTCG_4	1.64075675654183	0.0472036239704733
ATCGATCGAGTCTGTGTTACGGCT_4	1.62378282320577	0.00553145586877393
ATCGATCGATCGGTGTAACCGAAG_4	1.87294611674247	0.0322610959866131
CATGGCTACTGGAGTAGCGTTCTA_4	1.85979455166482	-0.0370788
ACCACGATATTCGAGGTTACGGCT_4	1.95973987113102	-0.0732791
ACCACGATTCCGTATGGCTTCGAA_4	1.91870731392878	-0.107448
TTGGACGTGAAGAGGTTGCGTAGA_4	2.1007124730009	-0.0609574
ACTCTCGATTGGTCTCCTGCGTAT_4	1.49079093351627	0.0221979229740907
GTCGAAGACCTACTGACAAGTGCA_4	1.68478357535642	0.0809111986043529
CTTAGGACCTGACACAGCCAGTAT_4	1.60312813126043	-0.0575026
GAGACGATGAGATACGTTCTCTCG_4	2.19077074322208	0.0466684232515227
AACTGAGCGAACGCTTGTCTAGGT_4	1.91113572757277	0.079430921525395
ACGTTCAGCGGATTGAAGGTCACT_4	1.99239953846066	-0.0779638
CCGTAAGATTGGTCTCTACACGCT_4	1.69058143307273	0.0132087963653767
CGGCTAATTGAGGTGTCAGTCTTC_4	1.28671931468802	-0.0528832
GCAAGATCCTCTACTCGCACGTAA_4	1.59785000413757	-0.173892
ATGCACGAGCTCTGTACTCAGCTA_4	1.93877290914981	-0.117553
CCTTGATCGTCGGTAATCGAGTGA_4	1.79463717417488	-0.0261113
CTGATCGTTGCCATTCTGGTCCTT_4	2.0823212896103	-0.116153
TACGCTACGACTTAGGCCAGTGTT_4	1.91263944212297	0.14163834569939
TTCCAAGGAGAAGCGTTCGTAGTC_4	1.67736198157224	-0.0422609
GATGTGTGGATGCACTTGGTCCTT_4	1.50197793100362	0.152785015345975
AACTGAGCTGGAGAGTTGCCTCTT_4	1.48512982107648	0.139503679311554
TACGCTACATTCGAGGACAGCAAC_4	1.92646716707832	0.017548223911398
TGAAGACGACGATGACTATCAGCG_4	1.95766601234002	-0.0209191
ATCGATCGGAACGCTTCGTGTACT_4	1.91433023283801	0.000543703716463895
CGACGTTAAGGTTCGATCCGAGTT_4	1.86486035461868	-0.112022
GTGCCATAGAATCGTGACAGCAAC_4	1.82071285301649	0.0919899958936198
GTTGTTCGGTCTCCTTGTTCATGG_4	1.8867466942363	0.0430398100980206
TGGTACAGGACTATGCTGTGGTAC_4	1.64767911223267	0.0272143419163662
CGGTTGTTTTACCGAGTTGACAGG_4	1.77474636455413	-0.0767097
CTTGTCGAGAGGACTTTCGACATC_4	1.83042689508477	0.0662903153224918
GACGATCTTGGAGTTGTCGTAGTC_4	1.82413316618647	-0.131979
CGCTCTATTACATCGGCACCACTA_4	1.66907315031218	-0.0253092
CGACGTTACTTGCTGTTGTGGTAC_4	1.69869999711629	0.102228740978618
CAATGTGGCGATAGAGGTTCATGG_4	1.86968208127078	0.0502744436631998
AACCGTTCCTGGAGTAAACCTCCT_4	1.8176546440032	0.122219371668628
AACGTCTGGAAGAGGTTAGGATGC_4	2.1206382943546	-0.0207777
CTGATCGTTTGATCCGCGTGTACT_4	1.79488	-0.0385236
GCGTCATTGTATGCTGTGCCTCTT_4	1.44019502536834	0.13082105794158
GCGTCATTGTCTGATCAACCTCCT_4	1.86932399178284	0.0412657799438408
ATATGCGCGCCTTGTTGACAAGAG_4	1.84583790547316	0.0253979619536885
GTTGACCTCAACCTAGTAGCCGAA_4	1.85472642994077	0.0243318804276832
CAATGTGGACGATGACCCTTCCTT_4	1.98282028054076	-0.063008
CACTAGCTACCAATGCTGCCTCTT_4	1.76639880259413	0.0262895224777247
ATCCAGAGCGATAGAGTAGGATGC_4	1.21163315670596	-0.116923
CGTTGCAAGATACTGGTGCCTCTT_4	1.89838548192906	-0.078897
ATGCCTGTCTCATTGCTCGACATC_4	1.91129328680126	-0.0560387
ATGCACGATGTGAAGCGCACGTAA_4	1.86025474669457	0.105575329518109
CGCTCTATCAACCTAGCTACAGTG_4	1.73398719050972	0.0275491502033462
GAAGGAAGTGGAGAGTGCCAGTAT_4	1.70443328826863	0.0743736114568057
TTCCAAGGACCTAAGGCTCTGGTT_4	1.8939948347663	0.0307440942895003
AGCACTTCAGTCTGTGATGGAAGG_4	1.7704247459267	-0.101531
TACGCTACGTCCTAAGCTGGTTCT_4	1.8151063018245	-0.120232
TGAAGACGAGTGCAGTGTAGCATC_4	1.80733521955911	0.00749215705074605
ACGGAACACGGATTGAATTCTGGC_4	1.84131390824003	-0.0732589
ATCGATCGTTGGTCTCCAGGTATC_4	1.7710718707524	0.00189849260544969
ATGCCTGTGAAGAGGTCATCTACG_4	1.8232387492081	0.0642446588708121
ACCACGATGATACTGGACCATGTG_4	1.85742218431465	0.0255770421055748
CGGCTAATCGATAGAGCAAGGTCT_4	2.03188168587333	0.148448255117226
GATTACCGCGACCATTTCCGAGTT_4	1.8714959157296	-0.0640705
AAGCACTGAGCTCCTACCTTCCTT_4	1.72349895744971	-0.0830845
AGAGTAGCCCTACTGAGATTGGAG_4	1.8320612153877	-0.00790723
ATCACACGCAGTTCTGTCTGAGAG_4	2.10312445055612	0.0176002490224842
ACGTTCAGCTCAGAGTGTGTTCCT_4	1.88603018333324	0.01918241083653
AACTGAGCACCAGCTTAGGCATAG_4	1.54601698833912	-0.0449353
AGTGGATCTACATCGGTACACGCT_4	1.77600334234072	-0.0637461
CCTTGATCGATACTGGCATGGAAC_4	1.92814070730049	0.00659535689514365
GAGCAGTATACGGTTGACATAGGC_4	1.66978458455856	0.0109778196865069
GCTATCCTTCGAAGGTAAGAGCCA_4	1.91192808693694	0.00632942662691371
TGGTACAGAATGCCTCCTGGTTCT_4	1.68954969416354	0.0148992358031739
CATACCACAATGGACGCATCTACG_4	1.67403671821929	-0.036027
GTTGACCTCGGATTGAGCATACAG_4	1.51799771485582	0.000123284465861573
CGCATGATCTATCGCATCGAGTGA_4	1.90552589279687	0.0746230715072709
GTTGACCTTTGGTGAGCATGGAAC_4	1.64287212950418	0.149434584764152
ACGTTCAGAGGTTCGACATGGAAC_4	2.02781124667021	-0.12518
ACGACTTGCAGAATCGGCAATTCG_4	1.8399494732834	0.0360703880520489
AGCGTGTTGAGATGTCACCTTCTC_4	1.92924874089112	-0.0932283
TCAGGCTTTGTGAAGCTTAGGTCG_4	1.66354992892024	-0.0374097
AACCGTTCTGCAGGTAGCCAGTAT_4	1.3553793432638	-0.0973944
GTTGTTCGGAACGCTTCAGCGATT_4	1.82104308696273	-0.0273846
AGAACGAGGTAGAGCAGATCGTAC_4	1.62204589761316	-0.0661577
CATACCACTACCAGGATCTGCTCT_4	1.83990386209716	0.0248548529312091
ACGGAACACTTACAGCTCTGAGAG_4	1.83684103231298	0.118476479560167
AGCACTTCGCCTTGTTACGGTCTT_4	1.68941316153862	0.0486045091666174
CACCTGTTCTCTACTCACTGTGTC_4	1.67880883455962	-0.128955
CGCTCTATACCTAAGGCGATGCTT_4	1.38981643747198	-0.0358742
TTCCAAGGTCGAACCAAAGAGCCA_4	1.26920439880401	0.0509957755004173
ACGGAACAAGCTCCTATATCAGCG_4	1.9161215789772	0.0313473001845188
ATCCGGTAAGCTCCTAAACCTCCT_4	1.79161730572373	0.00544017844701083
GAAGGAAGAGGTTCGATCACGTTC_4	1.9902999172216	-0.163157
TGGTACAGCAACCTAGTGCCTCTT_4	2.02516794453715	-0.0361971
AGAGTAGCTTGGTGAGGCATACAG_4	1.78350620537393	-0.0425636
CTTCGACTGCCATAACTCTCCGAT_4	1.87690538455144	0.0151555392339339
GATCGAGTTGTGAAGCGCTTCGAA_4	1.76824596798085	0.00905573636415669
AAGCACTGCAGAATCGCAAGCAGT_4	1.95884995881607	0.0731658254652136
CCTTGTAGGTATGCTGTCTGCTCT_4	1.67490526945328	0.0261136771491785
ATCCGGTAACCAATGCTGTGGTAC_4	1.62879697624669	0.0151870602649394
ATGCACGACCTACTGAGCTGTTGT_4	1.66393206361805	-0.0885456
CCTGATTGGACGAATGGACAAGAG_4	1.83818825643786	0.0597507452446429
GAAGTTGGAAGGACACTAGCCGAA_4	1.9514106260883	-0.0665521
AGAGTAGCTGGAGTTGCGAACTGT_4	1.83522843401964	0.0173016262571495
ACAGCTCAACATTGCGCACCACTA_4	2.06283276877206	-0.105867
CGGTTGTTTGAGGTGTGATTGGAG_4	1.91683767007392	0.0581724022250396
CTGTTGACCGTTATGCCTACAGTG_4	1.6823361133965	0.00790851258730632
CAATGTGGTCCGTATGACTGTGTC_4	1.82632539435066	-0.055046
ACTCCATCAGCTCCTACTTCGTTC_4	1.99663607533648	0.041588261613105
AGTTCGTCTGATCGGACAGTCTTC_4	1.54775518217498	0.112548683777871
ATCGATCGGTCCTAAGTGCCTCTT_4	1.69024669485543	0.0779573907691534
CGACGTTAGAACGCTTAAGGCTGA_4	1.45178897766255	0.0109200273828046
ATGCCTGTGAAGAGGTGACAAGAG_4	2.04021884185518	-0.0231813
TACGCCTTTGCCATTCCGTAGGTT_4	1.48865400725274	-0.0245699
CGTGTGTACAACCTAGCGTGTACT_4	1.40994034491999	-0.00520799
GTGAAGTGCTGACACATGCACCAA_4	1.78763193888374	0.125861187860796
ATGCCTGTGTCGGTAATTCAGCCT_4	1.62771952509839	-0.000984918
TGCTTCCATGTGCGTTTGTGGTAC_4	1.79901060628158	-0.0781797
CTGATCGTTGTGCGTTGCTGTTGT_4	1.83617046410528	-0.0198118
GATCGAGTCTCAGAGTCTAACTCG_4	1.72452494634814	0.00540164858577055
GAGACGATTTGGTGAGGCACGTAA_4	1.36839890006747	0.103288303541367
GCTATCCTTTCAGGAGAGTCAGGA_4	1.65237079196752	0.0152067441130614
GTGAAGTGGTCGGTAATCACGTTC_4	1.82717516799646	-0.0579919
CACCTGTTCAATCGACCATGGAAC_4	1.90962577882513	0.069851972515641
CGCTCTATGAACGCTTCAGTCTTC_4	1.48284205473345	-0.0476243
CCTGATTGTGCCATTCCTTCACCA_4	1.13977624155195	0.00426939200764778
GTGAAGTGAGCTCCTAGCTGTTGT_4	1.85266096565521	0.101447009591003
GATAGGCTCTCAGAGTGCTTAGCT_4	2.10703634837067	-0.109236
AGTTCGTCGAACGCTTCTCTGGTT_4	1.55659932342305	0.139200330457451
AACCGTTCACGTGATGCGGAATAC_4	1.77740781565674	-0.0557885
GAGCAGTAAGGCTTCTTCTGAGAG_4	1.96788809248825	0.0370063152321012
GTGAAGTGGTCAGTTGAGCAGATG_4	1.37290351553391	0.106963422055716
TGGTACAGGACTTAGGGTTCATGG_4	2.00591647243222	0.0340445765992574
ACTCTCGATAAGTGGCACGTCGTA_4	1.25118718279175	0.034364594731579
GAGACGATTGTGCGTTTCACGTTC_4	1.78835378645747	0.0686801415847113
CGCATGATCTATCGCATCTCCGAT_4	1.91616691570126	-0.132719
CATACCACTCTAACGCTCTGAGAG_4	1.95922370286035	0.0133393378234159
GTCGAAGACTATCGCACGAGTATG_4	1.75729429922155	-0.0308722
CATGGCTAATGGTTGCTCCGAGTT_4	1.66280853337146	-0.0675662
GTTGTTCGCTAGGCATTCAGACGA_4	1.92783662103208	-0.120551
CGGTTGTTTACCAGGAGCTTCTTG_4	1.44143776284248	0.0897482282297535
TATCGGTCGAGATACGGCACGTAA_4	1.88961	0.0679263931769945
GTTCTCGTCCGACTATGTAGCATC_4	1.43591241562766	-0.00633771
ATCGCCATCGATAGAGACCTTCTC_4	2.0492918185635	-0.0755646
GTTCTCGTAATGGACGAGGCATAG_4	1.92858764168011	-0.0032613
GTTACGCACCGACTATTCTCCGAT_4	1.86621942888784	-0.000840998
CAATGTGGCAATCGACCAGGTATC_4	1.80294376520612	-0.111785
TAACCGGTGTCAGTTGTCAGACGA_4	1.70086641775678	-0.175512
GATTGCTCCCAAGTTGACAGCAAC_4	1.70218250238505	-0.0933029
TCAGGCTTAGGTTCGAGTTCATGG_4	1.83076035912865	-0.0478835
CCTTGATCTAGTTGCGCCAGTGTT_4	1.82792622969792	0.0230521891830113
GTTGTTCGTACCAGGATCGTGGAT_4	1.95772409007302	-0.0934159
GAACATCGCTAGGTGAAGCAGATG_4	2.0087148798584	-0.0113374
TGCTTCCACTGACACATCTGCTCT_4	1.17968479888801	0.0298968084464897
CCTTGTAGACCAATGCCGGAATAC_4	1.85173566585646	-0.0297697
AACTGAGCGACTTAGGCAAGTGCA_4	1.91954114835562	0.0457366696587325
ACTCTCGACTGACACATGCCTCTT_4	1.21562873634331	0.0286732747899437
TGAAGACGGTCCTAAGGACAAGAG_4	2.06208342013777	-0.121479
TCAGGCTTCGAGACTATTCAGCCT_4	1.97041058887554	-0.04214
TTCCAAGGTCTCTAGGCATAACGG_4	1.36442569754426	-0.0576347
ATCCAGAGACCTAAGGCTCTGGTT_4	2.04739692092301	0.0466185872272244
ACTCCATCCGAGACTATCTGCTCT_4	1.80664072206721	-0.134797
CGTTGCAAGCCATAACACAGCAAC_4	2.03763815421353	0.135745866087698
AAGCACTGCTCAGAGTTCTCCGAT_4	2.0882552580389	-0.0189498
TGGTACAGCATTCGGTCGAACTGT_4	1.83606611384485	0.0483547560437464
GAATCCGACTTACAGCGCTTAGCT_4	1.94203024753242	0.089548919555347
TATCGGTCCTTACAGCACGTCGTA_4	1.92675980471768	0.119312210164861
CAATGTGGACCAATGCCACCACTA_4	1.74643067229272	-0.0361608
CGTTGCAAGACGAATGGTAGCATC_4	1.63800352234739	-0.118996
TACGCCTTTCTCTAGGAAGGCTGA_4	1.88267049735918	-0.00802486
GTTGACCTCGTTATGCACTGTGTC_4	2.12020879858165	0.00561859541582407
CTTCGACTATCGGTGTTGCCTCTT_4	1.55833077975411	0.142721174841656
GACGATCTACATTGCGTTAGGTCG_4	1.86299040396301	0.0186624970487994
ATGCACGAGAATCGTGTGTGGTAC_4	1.78858568820606	0.165436191539261
CCTTGTAGAGGAGGAATCGTAGTC_4	1.93625682631354	-0.0783617
GTTACGCATCGAACCACACTGACA_4	1.96188178924067	0.0152293127164901
CGGCTAATAGGAGGAACCAGTGTT_4	1.94029734570921	0.0278986647843025
ATGACGTCTCCGTATGTTAGGTCG_4	1.45969424862964	-0.156357
ACTGAGGTAATGGACGCAAGGTCT_4	2.02177641450226	0.0446570952264689
CTTCGACTTAGTTGCGTAGCCGAA_4	1.76065670286938	0.088773884636231
TGGACTCTTGAGGTGTAGCAGATG_4	1.41156894268385	0.0734705810525811
ATCCGGTAGTCTGATCACCTTCTC_4	1.80128213187585	0.0461949103070964
GAACATCGGAAGAGGTTGGTCCTT_4	1.88595155021214	-0.0192609
ACTAGGAGGTCCTAAGTAGGATGC_4	2.0726808725712	-0.0337699
GAAGTTGGAGGTTCGACAGGTATC_4	2.02622642608314	-0.0858367
CTGTTGACGTCTGATCCTGGTTCT_4	1.6241119987557	0.0643205333887984
GTGAAGTGGAATCGTGCGTGTACT_4	2.17245596234262	-0.119544
TATCGGTCGATAGCGACCTTCCTT_4	1.70599958954964	-0.0832847
AGTTCGTCCTAGGCATTTGTCGGT_4	1.40049141389777	-0.00540764
CGCATGATGATGCACTGCTGTTGT_4	1.86646229487097	0.0232442527051849
CTGATCGTTCGAACCATTAGGTCG_4	1.47420671869759	0.090009864287344
CGGCTAATTTACCGAGAGTCAGGA_4	1.9034305293815	-0.0237402
AGAACGAGGTAGAGCATTCTCTCG_4	1.92176422486161	0.00398642942689559
ACAGCTCATGTGCGTTCTCTGGTT_4	1.78207883689191	0.126523846345273
CGCAATCTTTGGTGAGCATGGAAC_4	1.95266332366326	-0.060784
ATCGATCGAATGGACGCTCTGGTT_4	1.89504041001193	-0.169696
CCTGATTGGTCTCCTTGTCTAGGT_4	1.69554234120428	0.104885255296313
ATATGCGCTACGGTTGTCAGACGA_4	1.7192610032718	0.239814311057905
AGAACGAGAAGGACACTCTGCTCT_4	1.87637381982134	-0.0699549
CATGGCTAAGGAGGAAGCTTCTTG_4	1.82311427166106	0.0817879947625493
CGGTTGTTCTAGGTGAAGGCATAG_4	1.47690421925945	-0.058527
TCGCTGTTAAGGACACTAGGATGC_4	1.81486998565598	0.252275742175089
AGAACGAGGCCTTGTTAACCGAAG_4	1.85291605752194	0.0879189906674836
CAACACCTTCGAAGGTGTTCATGG_4	1.68024610556119	0.177789654891128
ATGCACGAGCCTTGTTTAGCCGAA_4	1.73347734547081	-0.086266
CCTTGATCTCCGTATGGCTTCTTG_4	1.81275186268437	-0.0888191
GTTACGCAGCCATAACCTTCACCA_4	1.87805679229154	-0.179944
CCTTGATCTAAGTGGCCTTCACCA_4	1.9503612314454	0.0584911945629402
TTCCAAGGAGAAGCGTACGTCGTA_4	2.14084321976754	-0.0887254
ACTCCATCCGAGACTAGATCGTAC_4	1.73472846954712	-0.0564557
GTTCTCGTTGCAGGTACATCTACG_4	1.78670104567425	0.02844249868878
ACAGCTCAAGAAGCGTCTCAGCTA_4	1.82966252092887	-0.0955857
TATCGGTCCTCTACTCCACTGACA_4	1.64233706967592	0.11060886300762
TGTGACTGGAATCGTGATTCTGGC_4	1.59684766689466	-0.0151387
CGCTCTATATCGGTGTCAGGTATC_4	1.84138243612835	0.0410788270197624
ATCGATCGCGTCAATGCGTGTACT_4	1.8928116378386	0.0461438916826979
GAGCAGTAGACGAATGAACTGGTG_4	1.96938138040393	0.141479026555901
GAAGTTGGCGCTAGTAAGGTCACT_4	1.83977447464857	-0.0202528
TTCGTTGGACCTAAGGTTGTCGGT_4	1.7472015949015	0.0927112174228484
GATCGAGTGACGAATGCGAGTATG_4	2.11916918593436	-0.058781
TGGCATGTGATGCACTACATAGGC_4	1.91980512164762	0.000528592554080526
CATGGCTATTGGTCTCCACTGACA_4	1.57049565064741	-0.011268
ATGCACGAAATGCCTCGCTTCTTG_4	1.86748793612096	-0.0524453
ACAGCTCAAGTCGACACCAGTGTT_4	1.93687495052244	-0.0337741
CTTGTCGATGAGGTGTCCTTCCTT_4	2.05332115380813	-0.121588
CAACACCTTGTGAAGCTACACGCT_4	1.89407398371575	-0.0501753
TGCTTCCAGCTCTGTACATGGAAC_4	1.55193527641912	-0.027819
CGCTCTATATTCGAGGAGGTCACT_4	1.71916286638616	-0.0344819
GATTACCGCGATAGAGTAGCCGAA_4	2.13873580167534	0.0245932168080094
GATTGCTCGAGGACTTTCTCCGAT_4	1.84654474356257	-0.0488596
CATGGCTATGTGCGTTTGCCTCTT_4	1.71698180415941	0.131654656138193
CCGTAAGACATTCGGTCGATGCTT_4	1.9456223259632	-0.116787
GTCGAAGATGCAGGTATCGACATC_4	1.79562981999771	0.0434207068379943
GTGAAGTGCCGACTATAACCGAAG_4	1.76010111194772	-0.0395454
CGGTTGTTCTAGGCATTCGACATC_4	1.94109916821909	-0.019546
AGAGTAGCAGGTTCGATGTGGTAC_4	1.85422	0.16664319076479
GTCGAAGACTAGGCATTCTGAGAG_4	1.80445525794647	-0.00848299
GCACAACTTCTAACGCCACTGACA_4	2.12249397502903	-0.068868
GTCATCGACAACCTAGCAGCGATT_4	1.68228447397911	0.0207624930976114
AACGTCTGGACTTAGGGTGTTCCT_4	2.02074580015512	-0.138154
GTTGTTCGCGCTAGTACAGCGATT_4	1.68323887517323	-0.049703
GATTGCTCACCAATGCGACAAGAG_4	1.52491041270146	-0.0296036
ATGCACGAATGGTTGCCCAGTGTT_4	1.32605	0.00436839778011452
CGCATGATCTAGGCATTCGACATC_4	1.92191880830276	-0.00477129
GATAGGCTAGAAGCGTCTCTGGTT_4	1.93411875251513	-0.0316269
CATACCACGTCGGTAACATCTACG_4	1.92187289649428	0.106166794367015
CCTGATTGGTATGCTGTACACGCT_4	1.44655990497127	-0.0205147
TGGACTCTGAGATACGCAGGTATC_4	2.04971307366229	-0.0875339
AGTGGATCCTTGCTGTCAAGGTCT_4	1.99171475090473	-0.130864
CGGTTGTTCAGTTCTGACTGTGTC_4	1.7407117082941	0.0730524604204676
TACGCTACTGGAGAGTTTCAGCCT_4	1.93969352014652	-0.03111
TGGTAGCTGTCAGTTGTCGAGTGA_4	1.08384051964795	-0.023207
GTTACGCACGGATTGAGACAAGAG_4	1.98937816660147	-0.0650317
TGGTAGCTCGATAGAGTGTCCAGA_4	1.83596789968852	0.0365925519727922
CGGCTAATCGTCAATGTCGAGTGA_4	2.03087332959323	-0.0552029
GTCATCGAGTCTCCTTTTAGGTCG_4	1.79329959334636	-0.132813
CATACCACACTCGTTGTGGTCCTT_4	1.99241469814164	0.0760864953204747
ATGCACGACATTGCCTTTCTCTCG_4	1.69550739273436	0.0982392428033304
GTTACGCACGTTATGCCGTAGGTT_4	1.96347161407479	-0.0591262
ATCCGGTACTTACAGCCTAACTCG_4	2.01345565139415	-0.0809839
ATCGATCGTGCAGGTATATCAGCG_4	1.89471612943722	0.0833470992594804
GAACATCGTACGGTTGTCTGAGAG_4	2.07194715593751	-0.136354
ATCCGGTAGTAGAGCATTGACAGG_4	1.58725202129213	-0.0988625
GTTCTCGTTTGGTCTCTCACGTTC_4	1.43316644406528	0.115603636883209
CCTGATTGCATTGCCTCTACAGTG_4	1.65153071799137	0.042235178325236
CAATGTGGACGATGACGCGTTCTA_4	1.84034960491987	-0.102032
TTCCAAGGTGGAGAGTGACAAGAG_4	1.89141259701609	-0.126126
AAGCACTGTGGAGTTGCCAGTGTT_4	1.82433586602875	0.0087703032874463
TCAGGCTTTCGAACCAACATAGGC_4	1.60766705993193	0.012530159762185
GAGCAGTATGTGAAGCATGGAAGG_4	1.8081981648587	-0.069338
CGGCTAATCACAAGTCCTACAGTG_4	1.93003966594347	0.00462814225882555
CATGGCTAATTCGAGGCTAACTCG_4	1.7651254218515	-0.0712151
GTCATCGATCGAACCAACAGCAAC_4	1.91688258568629	0.0338003311727675
TGAGCTAGTCTAACGCGATCGTAC_4	1.82836353268999	-0.091412
TCAGGCTTGAGATACGTTGTCGGT_4	1.83950827580818	-0.00727162
ACGTTCAGCCGACTATTCTGAGAG_4	1.98982430368241	-0.0524498
CCTTGATCTTGGTGAGAACGGTCA_4	1.59872835917795	0.0300352693837021
ACGACTTGTCCGTATGCAGGTATC_4	2.06135390089101	-0.0979582
GTGCCATACTCTACTCTCGAGTGA_4	1.82656223989374	0.0341261756483345
CTGATCGTAGCTCCTACCATACGT_4	1.97731850503423	-0.03241
TACGCCTTCTAGGCATCGAACTGT_4	1.8888918842909	0.0429768750546334
CATACCACGCCATAACTTCTCTCG_4	1.90902838299024	0.026869592480213
TTCGTTGGAGTCGACAGCGTTCTA_4	1.77844183899824	-0.0402125
CGCATGATACTCGTTGGTGTTCCT_4	1.91216656300528	0.0224466797272624
GATTACCGCAACCTAGTCGTGGAT_4	1.57721416685217	0.125814911081502
AGAACGAGACCAATGCCAGGTATC_4	1.33451999638882	-0.0110153
CGACGTTATTGGTGAGTCTCCGAT_4	1.94781375683109	0.159964957005017
AACTGAGCTGGAGAGTTCAGACGA_4	1.99354010606787	-0.0900441
TGGTACAGTAGTTGCGCACTGACA_4	1.73939594990279	0.0511712854605247
GAGACGATCTAGGTGACTTCGTTC_4	1.86388	0.0751091593043782
ACTAGGAGCTAGGCATTGTCCAGA_4	2.15426250774889	-0.0632439
TTGCAGACCGTACGAACAGGTATC_4	1.79828664090781	0.0704996935528984
GTCGAAGAGTCTCCTTCTTCGTTC_4	2.01742768431833	-0.0153806
TGAGCTAGCAGTTCTGCTGGTTCT_4	1.12404581087445	0.16555413458604
TGAGCTAGTGGAGTTGTGTCCAGA_4	1.70845693114743	-0.0894773
AAGCACTGCCAAGTTGCAAGGTCT_4	1.83208590947289	-0.106219
AACTGAGCGAACGCTTCATCTACG_4	1.90600932617899	0.00596298644558824
AACTGAGCGCTGGATTCCAGTGTT_4	1.77779041011199	-0.0121976
ATGCACGACTTACAGCCCATACGT_4	1.78235406841206	-0.0116953
CTTAGGACCTCATTGCACCGCATA_4	1.4495090812192	-0.0390887
ACCACGATGCTCTGTACAGGTATC_4	1.49166034490077	0.116320114685943
GAGCAGTATGGAGAGTCATCTACG_4	1.9453631827948	-0.0161091
AGAACGAGACGATGACGATTGGAG_4	1.83368475241803	0.0348736418322837
TGAAGACGTGTGAAGCGACAAGAG_4	1.84085533803247	-0.0556021
GTTGACCTCTAGGTGACCTTCCTT_4	1.35020317987322	0.0178658737824552
ATGCCTGTCTCATTGCCTAACTCG_4	1.69178725069427	0.178164543509389
CGGCTAATCAGTTCTGACAGCAAC_4	1.58367352412212	-0.150836
TTGGACGTCAATCGACAGGCATAG_4	1.88869329391392	-0.0971279
GTTCTCGTCGAGACTACGTGTACT_4	1.64150174049644	0.0495654654867343
CAGTCCAAACGATGACGCCAGTAT_4	1.75040194885692	-0.144472
CAATGTGGGACTATGCCAGCGATT_4	2.01595979866408	-0.00434972
GCAAGATCTTACCGAGTATCAGCG_4	1.60398852099214	0.0575358804969364
GAATCCGATACGGTTGTTACGGCT_4	1.92049053516805	0.0395324556959808
CAACACCTCGTTATGCAGCAGATG_4	1.42654038945456	-0.103728
CGCATGATGTCTCCTTAGGCATAG_4	1.72665602417834	-0.0636598
CTTAGGACCGGATTGATTGTCGGT_4	2.01802736577983	-0.0550045
CATGGCTAGACGAATGCTTCACCA_4	1.75538245682933	-0.106183
TTCCAAGGTCCGTATGTGCGTAGA_4	1.68436473284192	0.0369537720719223
ATCGATCGAGGAGGAACTTCACCA_4	1.83955468756884	-0.0549807
CAGTCCAAACGTGATGGATTGGAG_4	2.09415200195829	-0.0543388
CGCATGATAGAAGCGTTATCAGCG_4	1.72800693478422	-0.0413714
ACTCCATCGAAGAGGTAGGCATAG_4	1.72671502814291	0.021820089677162
ATGCACGAGAGGACTTACTGTGTC_4	0.98111118560064	0.0850285953568418
TACGCTACCATTGCCTTTCTCTCG_4	1.85584967900288	-0.0113264
CGGTTGTTTGCCATTCGCTTCTTG_4	2.05515476539954	0.0233781643370394
ATGCACGATGCAGGTAGCATACAG_4	1.94610575079835	0.0239618627781286
ACGACTTGCCGACTATGATTGGAG_4	1.56625996712253	-0.104368
ATCCGGTATGAGGTGTCAGCGATT_4	2.0095512311628	0.153794981001731
ATATGCGCTGGAGAGTGACAAGAG_4	1.96787927446297	0.0304902956033468
CATGGCTAGTATGCTGTGCACCAA_4	2.21058161234158	0.00792814018553195
AGAACGAGCGGATTGATTGACAGG_4	1.89607193467947	-0.109403
GACGATCTAGTGCAGTTTCTCTCG_4	1.62938158714566	0.16433763894783
CGCAATCTCTGACACATTAGGTCG_4	1.39965083839686	0.0121127387148712
ATCCAGAGTGTGCGTTCGTGTACT_4	1.54799	0.161947061278667
ATCCGGTATGGAGAGTGCAATTCG_4	1.99140502890371	-0.0209556
CGCAATCTTCTCTAGGTTCAGCCT_4	1.91802919116549	-0.0208523
AGCACTTCCATTGCCTAGGTCACT_4	1.95719485438975	-0.0314407
CGGCTAATCTATCGCATGCCTCTT_4	1.91118994229285	0.200499083818715
AAGCACTGTAGTTGCGACCATGTG_4	1.55505066407981	-0.0156156
CAACACCTAATGCCTCCTTCGTTC_4	1.87014338940848	0.123576779947244
TGTGACTGGAGATGTCTGTCCAGA_4	2.02182244646249	-0.0960964
CTGTTGACTACCAGGAAACCGAAG_4	1.86024039542997	-0.110969
TTCGTTGGCAATCGACACCGCATA_4	1.81784243962882	-0.012786
TGAGCTAGAAGGACACTCTCCGAT_4	1.4221489120834	-0.0453413
ACCACGATTCTCTAGGACTGTGTC_4	1.49792185408396	0.0142249528493443
TATCGGTCTCGAAGGTTGTGGTAC_4	1.87968941380697	0.135135081604993
ATATGCGCTCTAACGCGTAGCATC_4	1.7750380788338	0.105345557971949
CACCTGTTCGTTATGCTGCGTAGA_4	1.68699512223787	-0.0411447
CGGCTAATGAACGCTTCGAACTGT_4	1.94665916845544	0.106951273895585
GACGATCTCTCATTGCCTAACTCG_4	1.68297996434615	0.0151772179128992
GAAGGAAGCAATCGACGTGTTCCT_4	1.99015856054809	-0.084919
CCGTAAGATCCGTATGGATCGTAC_4	1.93254749798878	-0.0591604
CCTGATTGTACGGTTGGCTTCTTG_4	1.97798232669786	-0.0236028
ACGACTTGGTCTCCTTTGCGTAGA_4	1.76332086277159	0.01242023412473
CTGTTGACCTGGAGTACCAGTGTT_4	1.95609092334776	-0.0237884
ACTAGGAGGTCCTAAGAGGATCTG_4	2.15960868287429	-0.0566718
CGACGTTAGTATGCTGAGTCAGGA_4	1.82171918476515	-0.0721941
ACAGCTCATGTGAAGCGAGCTCAA_4	1.83471064729071	0.0388869987391587
GTTGTTCGGTCTCCTTTTGACAGG_4	1.70342710743021	-0.0432923
TACGCCTTGAGATACGCGTAGGTT_4	2.09292682915179	-0.0132259
ATGCACGACGTCAATGAGTACAAG_4	1.47002069166176	-0.0674813
ACGTTCAGGATACTGGGCAATTCG_4	1.57651049126894	0.0949084245106785
CACCTGTTCGTACGAAGCTTAGCT_4	1.96267689655823	-0.0273688
GTTCTCGTTCTCTAGGCGGAATAC_4	1.7242478634027	0.0693276522583076
TTCGTTGGAGAAGCGTCTTCGTTC_4	1.92241935169255	0.0057410203225165
ACCACGATCATTCGGTTCTGAGAG_4	1.89197970390455	0.0244728851348651
CCTTGATCCATTCGGTAGTCAGGA_4	1.55968424195306	0.0885060826892323
TGAAGACGCGTTATGCTTCAGCCT_4	1.81654371112944	-0.121853
AAGCACTGGAGATACGCATAACGG_4	2.00149221254429	-0.0792927
CACCTGTTGTCTGATCGCCAGTAT_4	1.93644502905556	-0.0657815
CTTCGACTCAATCGACTATCAGCG_4	1.81240518441297	-0.0726709
GTTGTTCGGACTTAGGAAGGCTGA_4	1.90133445048945	-0.0646884
TTGGACGTCAGAATCGCTTCGTTC_4	1.54763865283431	0.0771610844104036
ATGACGTCACATTGCGCAGTCTTC_4	1.89442873655019	0.00536654053491378
GCACAACTTCGAACCACGAGTATG_4	1.52661879781893	0.0994431544668525
GTTCTCGTGTCCTAAGGTCTAGGT_4	2.02830151560783	0.0476189023799098
TGGTAGCTACTCGTTGGATTGGAG_4	2.05610944052406	-0.0490424
ACCACGATGAAGAGGTCATGGAAC_4	1.48976421788605	-0.0132662
GCGTCATTAATGGACGCGATGCTT_4	2.05421019096698	0.141773492895979
CTGTTGACGCTGGATTAGGTCACT_4	2.14516517748951	-0.0963157
TGGTACAGGCCTTGTTTGTGGTAC_4	1.98591710083711	-0.0663619
TGGACTCTACGTGATGGCGTTCTA_4	1.9319312105148	-0.00537184
TTGCGAAGCTTGCTGTTCTGAGAG_4	2.00868012650735	-0.0238513
TTCCAAGGGACTATGCACTGTGTC_4	1.98134402005899	0.047673521923573
ACCACGATAGAAGCGTACCTTCTC_4	1.3705405679053	0.178837420980705
CCTTGTAGCTAGGCATAGGCATAG_4	1.9090472881457	-0.112485
GCAAGATCACATTGCGTCTCCGAT_4	1.32999764388611	0.0733693674763636
CGCATGATGTCTCCTTCTTCGTTC_4	1.7983684450791	-0.0418685
CTGTTGACCAGAATCGTCGACATC_4	2.07854521562097	0.0814578983595133
ACGGAACAGCTCTGTATTAGGTCG_4	1.98675838510319	-0.0226908
GATTGCTCGACGAATGGCACGTAA_4	1.94023943373538	-0.0264493
CCGTAAGAAGCTCCTACACCACTA_4	1.94638365443977	-0.0334173
TCGCTGTTTCGAACCAAGTCAGGA_4	2.10024818006282	-0.0387962
CTGATCGTTCCGTATGTATCAGCG_4	1.77253054699671	-0.0230448
CGTGTGTATGGAGTTGAACCGAAG_4	1.65698886693669	0.034113629787459
GTGAAGTGTACATCGGAGGTCACT_4	1.94150861527161	0.0332106508541184
TACGCCTTTTGATCCGATGGAAGG_4	1.88700925140588	0.00638215778046625
CGGTTGTTGCCTTGTTTTGTCGGT_4	1.53901756567035	0.055567388177731
ATGCACGAGTCTCCTTCATCTACG_4	1.84878860159853	0.00514035758750264
ATCGATCGACTCGTTGAGGATGGT_4	1.4975872546747	0.0774715727791625
GTTCTCGTTGTGAAGCTAGGATGC_4	1.84388757194772	0.00384073960469053
GTTGTTCGATCGGTGTTTGACAGG_4	1.73802152898971	-0.0529735
TCAGGCTTATGGTTGCTTACGGCT_4	2.15798593014626	-0.0877267
AACTGAGCGACGAATGGATCGTAC_4	1.95094027552085	0.0895573925112256
AGAGTAGCCAGAATCGGCTGTTGT_4	1.89186037071544	-0.0713438
GTGAAGTGCCTACTGAACGGTCTT_4	1.72858608555466	-0.177599
CAGTCCAACGAGACTAGCCAGTAT_4	1.8835573297668	-0.0702544
CGCAATCTAATGGACGTGTCCAGA_4	2.23349403788241	-0.023137
TGGCATGTTCTCGCAATCTGAGAG_4	2.0415500999991	-0.0343418
TACGCTACCATTCGGTCATGGAAC_4	1.91303035421076	0.0705232566196355
CCTTGATCCCAAGTTGTCGACATC_4	1.86289317900404	0.091014953421487
AACGTCTGCAACCTAGACCATGTG_4	1.91947591077675	-0.0682096
TGAAGACGCGGATTGACTACAGTG_4	1.79341645656013	-0.0657771
CTTCGACTTTACCGAGCTAACTCG_4	1.8336428870994	-0.117252
GATTACCGCTAGGCATGTTCATGG_4	1.74884260148401	-0.0242467
ACTGAGGTCTCATTGCGAGCTCAA_4	1.76266240655138	0.0291834917285334
CGACGTTATCCGTATGTCTCCGAT_4	1.37456064392826	0.0346028929238499
ACTGAGGTCGATAGAGGCGTTCTA_4	1.89491666422963	-0.117304
AGTTCGTCAGGCTTCTCGAACTGT_4	1.87829448023619	0.152002576576814
TACGCTACGTCAGTTGCAAGGTCT_4	1.36455994019579	-0.0248464
ACAGCTCAATTCGAGGGCCAGTAT_4	1.94497540120617	-0.03538
CAATGTGGGCTCTGTAACCGCATA_4	1.51454957684975	-0.135732
CGGTTGTTGTCGGTAAGCATACAG_4	1.7752419202034	0.0108187166743319
CTGTTGACTAAGTGGCGCTTCGAA_4	2.0229461209298	-0.0395924
GATTGCTCCTAGGCATTTGTCGGT_4	2.04402123097509	-0.0113969
CGGCTAATCTCTACTCATGGAAGG_4	2.11752104581066	-0.0786337
AGAGTAGCTGTGAAGCACTGCTAG_4	1.62231204443232	-0.0939739
GAATCCGAGTCCTAAGGCTGTTGT_4	1.82782205618464	-0.0514296
AAGCACTGTCTCGCAAGCACGTAA_4	1.99330690312365	0.00159016382415281
CACTAGCTTGTGAAGCTAGGATGC_4	1.92068623979693	-0.167015
TGTGACTGAGGTTCGATCGACATC_4	2.20673351240781	-0.0531597
ATGACGTCTTGGTGAGTGCACCAA_4	1.71429159102783	0.237450572376207
CTGATCGTTGTGAAGCGACAAGAG_4	1.72036815665488	0.0656981039998685
ACAGCTCACAGTTCTGACAGCAAC_4	1.76447342847323	-0.0329125
ATCCAGAGTCTAACGCTGTGGTAC_4	1.89109904444329	-0.049619
GATGTGTGGCTGGATTAAGAGCCA_4	1.84342248140293	0.0028200805154
CATACCACCACAAGTCCGAGTATG_4	2.0245479403059	0.0425839063928722
CGCAATCTGTAGAGCAACCTTCTC_4	2.06089644472893	-0.120524
ACCACGATCTTGCTGTAAGGCTGA_4	1.79398740369891	0.0154059646355222
ATCGATCGCTGGAGTAAGGATCTG_4	1.50685563046382	-0.0880453
CGGCTAATAGCTCCTAACCGCATA_4	2.02599026024808	-0.041354
ACCACGATGTCCTAAGCGTGTACT_4	1.76485622301042	0.0621849532780337
CCGTAAGATTGGTGAGGTGTTCCT_4	1.94320617895781	0.0668203665991182
CCTTGTAGCTCTACTCCGTAGGTT_4	1.55618030312151	-0.0385853
GTGAAGTGGATGCACTAACGGTCA_4	2.01092512217725	0.0269431052051295
CCTTGATCCGCTAGTAAACCTCCT_4	1.60479220218254	-0.063082
TTGCAGACCAGTTCTGCTTCACCA_4	1.93989	-0.113876
TGAAGACGGCCATAACGAGCTCAA_4	2.05799174577917	0.0640363054071008
TTCGTTGGAGGCTTCTACCTTCTC_4	1.81528223046679	-0.0471597
ACTAGGAGATCGGTGTTCGTGGAT_4	2.08948225996369	-0.0151875
ATGCACGATGGAGAGTTTAGGTCG_4	2.17102435904102	-0.0356659
GAAGGAAGCTGACACAAGCAGATG_4	2.11473639185909	-0.00598046
AGTTCGTCAATGGACGCATGGAAC_4	1.88682287377863	0.11215639143063
ACGGAACAAGAAGCGTGACAAGAG_4	1.75909595381312	-0.00226925
CGCTCTATTGTGCGTTGTGTTCCT_4	1.96797459804946	-0.0616986
CTTGTCGATGCAGGTATAGCCGAA_4	2.17792304213248	-0.0354759
TGGCATGTACCTAAGGCATAACGG_4	2.01744501064353	0.0302449687380086
AGAGTAGCGTATGCTGCCAGTGTT_4	2.02107666152506	0.0855969260481765
GTGAAGTGGTAGAGCACTAACTCG_4	1.75531959388129	0.00319148644702075
GAGCAGTAACCAGCTTAACTGGTG_4	1.94456197224538	-0.0444757
GACGATCTCAGAATCGAGGTCACT_4	1.90958000501396	-0.0402536
CGGCTAATTACATCGGGCTTAGCT_4	1.84055083245838	0.0243780798391592
CGTGTGTAATCGGTGTTTAGGTCG_4	1.74985734516584	0.334627482360328
GTTCTCGTCAGTTCTGAAGGCTGA_4	1.58701981284761	-0.0762068
TGGCATGTAATGGACGGCTTAGCT_4	2.07647703681506	-0.0127804
GTTGTTCGTGCCATTCGCGTTCTA_4	2.04587769903065	-0.104217
GACGATCTTGCCATTCACCGCATA_4	1.65667056894391	-0.0021942
AAGCACTGTTGATCCGTCTGCTCT_4	1.96510483627545	-0.102496
ACTGAGGTTGAGGTGTGCAATTCG_4	1.82030048959304	0.0482124150405235
AACCGTTCGTATGCTGAGCAGATG_4	1.99332171011236	-0.130808
ATCACACGAGCTCCTAACTGCTAG_4	1.98732154501774	0.0745191868049691
GAACATCGGAAGAGGTCCATACGT_4	1.97956841485277	-0.113969
ATGACGTCTGAGGTGTCAGCGATT_4	1.68816948291387	0.0227653269877673
CAACACCTGACGAATGTGGTCCTT_4	1.95121428561771	0.0270905562072244
AGAGTAGCAGAAGCGTTGCACCAA_4	1.81057413198756	0.10820479688487
GTGCCATAGTCGGTAAGCTTCTTG_4	1.86483005969942	-0.0878341
ACTGAGGTAAGGACACGTGTTCCT_4	2.18552305271494	0.044061064754901
TATCGGTCGCCATAACACAGCAAC_4	1.88504981223292	0.0346711191745421
CAATGTGGTGTGCGTTCGAACTGT_4	1.64185823498645	0.0639846969932428
TGCTTCCACTTACAGCCTACAGTG_4	1.59869537131086	-0.00675797
ATCCGGTAATCGGTGTCGGAATAC_4	1.76456401292667	0.0352793182833845
CGTTGCAATAAGTGGCTCTCCGAT_4	1.80735661186865	0.0874947108957339
CACTAGCTAAGGACACTGTCCAGA_4	2.11467018012922	-0.029423
ATGACGTCGACGAATGACCATGTG_4	1.77149514465606	0.0350466735779962
TGGACTCTGAATCGTGCTAACTCG_4	1.73748142179988	-0.055326
ACTCTCGAAGTCTGTGCATCTACG_4	2.07947509166802	0.1183839055835
GAACATCGTACGGTTGCGATGCTT_4	1.85097996593096	-0.0140116
ATCGATCGAGTGCAGTTAGGATGC_4	1.72026340980857	-0.0769022
GAAGTTGGTTGGTCTCCAGCGATT_4	1.60689226956238	0.0192509822172393
ATGACGTCGTCCTAAGACGTCGTA_4	1.53268724273978	0.0608071126580874
GATGTGTGTGCCATTCTGCGTAGA_4	1.88162724392613	-0.112094
ATCACACGCAGAATCGCTCAGCTA_4	1.6194520703407	-0.0374951
GTTGACCTTACGGTTGACCATGTG_4	1.92423053043013	-0.106545
GTGAAGTGTACCAGGATCGTGGAT_4	1.5673500034733	-0.0828994
CAATGTGGCTGGAGTAGATCGTAC_4	1.76595262042133	-0.0595097
AGTGGATCTGCCATTCCAGGTATC_4	2.06818445781276	-0.0234143
CAACACCTAGTGCAGTGTATTGGC_4	1.88180588941809	-0.0621546
GTGAAGTGATGGTTGCTGTCCAGA_4	1.7551930089672	0.0136261478102465
AGCGTGTTAATGGACGACGGTCTT_4	2.02389485139746	0.0955444774441093
TTGCGAAGAGAAGCGTAGGATGGT_4	2.08053770911685	-0.0538197
GTCGAAGAGACTTAGGACGTCGTA_4	2.08134832945031	0.0158039261504992
ATCGATCGGTATGCTGCAGCGATT_4	1.80362083563281	-0.0152355
GAGCAGTACGTTATGCGCATACAG_4	1.99426986347672	-0.0447064
CAACACCTCATTCGGTTCAGACGA_4	1.91675357652443	-0.030145
CACTAGCTAGAAGCGTTAGCCGAA_4	2.01299950994187	0.0573754439670398
TGGCATGTGATGCACTAGGCATAG_4	2.02916452134139	-0.096398
GTTGACCTACCAATGCTGGTCCTT_4	2.18369427343133	-0.119214
GACGATCTATTCGAGGTATCAGCG_4	1.69534201102459	-0.0575127
ATCCAGAGCGAGACTACGATGCTT_4	1.83189095775999	-0.0771139
ATGCACGAACGATGACAACTGGTG_4	1.93864162024752	0.103444582010405
TACGCCTTTGATCGGACCTTCCTT_4	1.62946184749617	-0.030581
GTTCTCGTCGGATTGAAACGGTCA_4	1.49827866720408	-0.0609726
CACTAGCTAGGCTTCTGCTTCGAA_4	2.2175065729054	0.00985784214349497
GATCGAGTGCCATAACAGCAGATG_4	2.03009271598361	-0.0142344
TGTGACTGCGCTAGTACCATACGT_4	2.10308516904322	-0.0251179
TTGCAGACTCTCGCAAACAGCAAC_4	1.9725965540754	0.00275853396117284
ACGTTCAGCGGATTGAACTGTGTC_4	1.66124473384423	0.142647407540857
GTTGACCTACGTGATGACTGTGTC_4	1.40746457000561	-0.0840597
GTTACGCAATGGTTGCGTATTGGC_4	2.06482857943381	0.00731326917629643
AGTGGATCAATGGACGTCGTGGAT_4	1.89426973236454	-0.113087
TGAGCTAGGATAGCGAAGGATCTG_4	1.94779711634337	-0.102147
TGCTTCCAGTATGCTGCAGTCTTC_4	1.51217404309305	-0.0145211
ACGGAACATCTCGCAAACCGCATA_4	1.81227886155068	-0.139946
GATTACCGTAGTTGCGACTGCTAG_4	2.1046592972813	0.0253494999064964
AGTTCGTCCTATCGCACAAGGTCT_4	1.84647153433731	0.0508017345330495
ATGCCTGTATCGGTGTTCGAGTGA_4	1.37229210037711	-0.0221305
GTGCCATATACATCGGCCAGTGTT_4	1.93939909611384	0.00942668758051851
TTGGACGTAAGGACACGATCGTAC_4	2.02288860126027	-0.13353
AGCACTTCTGCAGGTAGCCAGTAT_4	1.25585744346531	-0.00522192
CCTTGTAGGAAGAGGTGTTCATGG_4	1.55516407180018	0.0924059877010795
ACAGCTCAGTAGAGCATCTGAGAG_4	1.71797748208234	0.019327319310867
CGGCTAATCTTGCTGTGCGTTCTA_4	2.11865108172688	-0.101907
GCTATCCTCTATCGCACGAACTGT_4	1.96314599015588	0.0507291162672926
AGCGTGTTCTGACACATTAGGTCG_4	2.07485483602994	0.0840332083900528
TTCGTTGGTTGGTGAGCTCTGGTT_4	1.9386163698785	-0.0957676
ATGACGTCCTAGGCATAACCGAAG_4	2.17396595497255	0.0126095341845751
GCAAGATCTACCAGGACACTGACA_4	1.74458990163088	-0.070077
CAGTCCAACCTACTGATAGGATGC_4	1.79079765648861	-0.136394
AACCGTTCTGTGAAGCCTCTGGTT_4	1.34410174040383	0.33310530308528
CCTTGATCGCCTTGTTCATAACGG_4	1.10804077551973	0.161971652996267
CGGTTGTTACTCGTTGCAAGCAGT_4	1.91069241913079	0.10378982281988
CACTAGCTTGTGCGTTCAGTCTTC_4	1.77274588547505	-0.0959569
CAGTCCAAGCTCTGTACTCTGGTT_4	1.79718263641344	-0.0123485
CACTAGCTAAGGACACAAGGCTGA_4	1.99562603783676	-0.0746377
GAAGTTGGCAGTTCTGAGCAGATG_4	1.90487085972727	-0.117414
GACGATCTCAGTTCTGCGGAATAC_4	1.83479089224211	-0.115914
TCGCTGTTTGATCGGAAACCTCCT_4	1.82716743814349	-0.0567475
CGTGTGTACGTCAATGTGTGGTAC_4	2.00622392997997	0.0964794237316144
ATCACACGAGTGCAGTTCGTAGTC_4	1.5744273277918	-0.0158113
GCTATCCTCGGATTGACAGTCTTC_4	2.01462068241906	0.119237777028605
GTTCTCGTACCAGCTTCAAGTGCA_4	1.33005	0.144601869990957
TCGCTGTTAGGCTTCTCATAACGG_4	1.63678031030444	-0.0827065
GTCATCGAAGTCTGTGCGTGTACT_4	1.97409016888464	-0.024909
AGCACTTCCACAAGTCACTGTGTC_4	1.91952073140071	0.0412786416931734
ATGACGTCACGATGACAGTCAGGA_4	1.4029929583715	0.0536739309687465
ACTGAGGTAATGCCTCTGCCTCTT_4	1.84212765099587	0.0415012859965333
ATCGATCGTGAGGTGTATTCTGGC_4	1.89534084524576	-0.0300374
TGTGACTGAGCTCCTATTGTCGGT_4	2.15019998781997	-0.138603
ACTCCATCGACGAATGCATGGAAC_4	1.68521195054837	0.015174789858889
CGACGTTATACGGTTGCCATACGT_4	1.95706710575266	0.022977412492951
GTTGTTCGGAGATGTCAGCAGATG_4	1.91608168992501	-0.0698545
TGGTACAGCAACCTAGCTTCACCA_4	1.61902265425726	-0.114922
AGAACGAGCTCAGAGTGCTTCTTG_4	1.89151934655397	0.109169890847631
CACCTGTTTCGAAGGTCTTCACCA_4	2.19758778571646	-0.0941745
TATCGGTCTTGATCCGACCTTCTC_4	1.82034051395932	-0.0890145
TAACCGGTCTCAGAGTACATAGGC_4	1.97380805472543	0.0407692029483703
TCAGGCTTGAATCGTGTTGTCGGT_4	1.28311042445751	0.025665786229339
ACTGAGGTTGTGCGTTTTAGGTCG_4	1.71485214878096	0.0390973501065713
TCGCTGTTGAATCGTGCTAACTCG_4	1.28139900482086	0.0756231343983805
CGACGTTACCTACTGAGCGTTCTA_4	1.65242193108529	0.0529794718629766
CATACCACATGGTTGCATTCTGGC_4	2.0905991262924	-0.0714585
AGCACTTCGAAGAGGTTTCTCTCG_4	2.08370996689879	-0.137966
TACGCCTTACATTGCGTCGTGGAT_4	1.81172805598528	0.0512009121334627
CGCATGATACCAATGCTTAGGTCG_4	1.69575443445413	0.00506720063254007
TCGCTGTTGATAGCGAGCTGTTGT_4	1.95330242735765	-0.0981653
GTGCCATATTGATCCGAACCTTGG_4	2.11461545340675	0.0380754100068504
GAGACGATCAGTTCTGCTCTGGTT_4	1.64632167047481	0.0681353365172956
ATGCACGACTTACAGCAGTTCGTC_4	2.15567864469369	-0.0364563
GTTGACCTCGACCATTGAGCTCAA_4	2.04174615769739	-0.0031081
CGACGTTATGCAGGTACGTAGGTT_4	1.64382978374215	-0.0494952
TTCGTTGGCGGATTGACGAACTGT_4	2.09687644636467	-0.127111
CGGCTAATGAGGACTTATTCTGGC_4	1.67203701707142	0.0366335068278922
GTGAAGTGTCCGTATGTGCGTAGA_4	1.84345639674136	0.00115235288464677
CACCTGTTCGACCATTTTACGGCT_4	1.9030187979101	0.011096979613761
CATACCACCGAGACTAGTTCATGG_4	1.75165161107764	0.109987706082557
ACTCCATCTCCGTATGAAGGCTGA_4	1.83675160223188	-0.0167144
ATCGCCATCAATCGACACTGTGTC_4	2.08198719065301	-0.0636622
GATCGAGTCTCATTGCACTGTGTC_4	1.84417960268155	0.111853132372702
GTTGACCTGTATGCTGACTGCTAG_4	1.92115498779381	-0.0722508
GAAGTTGGTAGTTGCGTCCGAGTT_4	1.91078462147702	0.106958244982334
TTGCGAAGCAGTTCTGATTCTGGC_4	1.88675685431351	-0.0471043
TCGCTGTTCTATCGCAGTGTTCCT_4	1.96930685167394	-0.128736
ATCCAGAGGAACGCTTCATAACGG_4	1.88256983462693	0.0890080511745907
ATCCGGTATCTCGCAACTCAGCTA_4	1.63050269454341	0.0881641522591094
TATCGGTCTTCAGGAGCTGCGTAT_4	1.64289172742285	0.0315994658528541
GAGACGATCCGACTATTCGTAGTC_4	1.73030812606893	-0.117577
CAGTCCAAATCGGTGTGCTTCGAA_4	1.36139735262101	0.0158635026712213
AAGCACTGGATAGCGATCAGACGA_4	1.6858044788593	-0.0784006
TATCGGTCGAGGACTTACCGCATA_4	1.85133316924664	-0.10864
GTTGTTCGCTCATTGCTGCCTCTT_4	1.94069876050293	-0.0950043
GAAGGAAGGTCTGATCCCAGTGTT_4	2.17364069857084	-0.0974408
TCGCTGTTACGATGACTGCCTCTT_4	2.19740179143868	-0.0667094
GTTCTCGTACCAATGCAGGCATAG_4	1.70819230620185	0.059941134522775
TACGCTACAAGGACACCGATGCTT_4	1.92045274193706	-0.0557186
ATCGATCGCCTACTGAGCTTAGCT_4	1.85195440995864	0.10179068325744
GTTGACCTCAGTTCTGTTGACAGG_4	1.69753265670658	0.0278566863184069
CGCAATCTCAGTTCTGTCGACATC_4	1.87325661344179	-0.114973
TACGCCTTCTTGCTGTACTGCTAG_4	2.01843660478519	-0.0312493
ATATGCGCCTCATTGCTGGTCCTT_4	1.71829935754312	0.0884835150760156
ATGCCTGTGTCAGTTGACAGCAAC_4	1.74069012351321	0.0281444960863087
CATGGCTAGTCTGATCCTGGTTCT_4	1.99882906281215	-0.0761245
TGCTTCCACGTACGAAGTATTGGC_4	1.75685707909672	0.0127862002628002
CTTGTCGAGTCAGTTGTTACGGCT_4	1.83597115453149	0.0147844273786769
CGTTGCAAAATGCCTCCAAGTGCA_4	1.65097463960072	-0.0757777
TGGACTCTTCTCGCAATATCAGCG_4	2.02601	-0.081642
ATCCGGTATGCAGGTATGCCTCTT_4	1.86145507053518	0.0899041560085558
GTCGAAGACAGTTCTGCGGAATAC_4	2.01832650555235	-0.0362364
GATTGCTCGATGCACTCAGTCTTC_4	1.80928722552271	0.0158254424815233
GACGATCTCGTTATGCTGGTCCTT_4	1.71422643186431	0.0471102447440115
GTTACGCAAGTGCAGTCAGCGATT_4	2.01511705380344	-0.0798851
ATCGATCGCGTTATGCACCATGTG_4	1.48127278392628	0.0280003180214144
GAAGTTGGCTATCGCAACTGCTAG_4	2.17502506699997	-0.164476
GTTACGCACGACCATTCGTAGGTT_4	2.03692413833883	-0.12299
CCGTAAGATCCGTATGTACACGCT_4	1.99298706889056	-0.0784416
GATCGAGTGTAGAGCACTCTGGTT_4	1.63003687167858	-0.0353555
CGGTTGTTTACCAGGAGCTTCGAA_4	1.96505427145105	-0.0301435
TAACCGGTCTTGCTGTTCTGCTCT_4	1.83025557870929	-0.116146
GCTATCCTAAGGACACGATCGTAC_4	1.7120468061618	-0.0578403
GTCGAAGACATTGCCTAGCAGATG_4	1.96320208674223	0.050576823025752
GTGAAGTGCATTCGGTAACCTTGG_4	2.01397767731625	0.0298422778310008
GTCATCGAACCTAAGGACCATGTG_4	1.7411074910219	-0.0558729
ATGACGTCGATAGCGACATAACGG_4	1.99975873840403	0.0524963863584378
CAACACCTGAGGACTTCGAGTATG_4	1.46994641826567	0.0177509772286373
CCTTGTAGGATACTGGTGCGTAGA_4	1.60560650861711	0.0524376801269941
GACGATCTCTGACACACGAACTGT_4	2.0214195092215	0.0722415181911811
CGCATGATAGCTCCTAAGTCAGGA_4	1.02551870582273	0.0798842917199025
TGGACTCTCCGACTATACCTTCTC_4	1.88918504020603	0.0702062582822028
AACGTCTGTCCGTATGACTGTGTC_4	2.02983280505891	0.00156307610738701
TGCTTCCACCAAGTTGGCTGTTGT_4	1.81338373414468	0.021803324212532
GTGAAGTGGTATGCTGATTCTGGC_4	2.14120725888264	-0.0556499
CATGGCTAAATGGACGAGGATGGT_4	1.82965494738795	0.00160452848266265
CTTGTCGATTGGTCTCTCAGACGA_4	1.86067865743281	0.114327185299602
TCAGGCTTACCAGCTTTGTGGTAC_4	1.81949266518169	0.0578556093566396
GACGATCTTCTAACGCACCTTCTC_4	1.90316813141207	-0.0581109
CGACGTTACGTTATGCATGGAAGG_4	1.98921590154056	-0.06048
GTTACGCACGTCAATGGATCGTAC_4	2.36226983124556	-0.00693802
GTTACGCAGCCTTGTTTCGAGTGA_4	2.1971530968951	0.00538670375244132
AGCGTGTTGAAGAGGTTTGACAGG_4	1.90694	-0.0672208
GCACAACTCAACCTAGTGTGGTAC_4	2.19378150008887	0.0631090582130032
AGAGTAGCATCGGTGTGACAAGAG_4	1.97720606150072	0.0984116788457338
ACCACGATGTCCTAAGATTCTGGC_4	1.82819756626756	0.0520778610263326
GAACATCGTCCGTATGTGCCTCTT_4	2.04940316382134	-0.0966263
CGTTGCAATTACCGAGTCCGAGTT_4	1.8911905854073	-0.158356
GTGAAGTGGTCTCCTTCAAGGTCT_4	1.50263361715179	0.0154921361933406
ATGCCTGTGTCTGATCTTGTCGGT_4	1.82687564303491	-0.0181261
GCGTCATTTTACCGAGACCGCATA_4	1.90980464066553	-0.0577945
CCTGATTGCGTCAATGTAGCCGAA_4	1.93323476146406	-0.0220662
CAGTCCAACGTCAATGACCTTCTC_4	1.89282389597413	-0.0461489
GAGACGATCGAGACTAAACCTTGG_4	2.05216491335038	0.131604939249776
GATTACCGCAATCGACGCTTAGCT_4	2.16971413229613	-0.0745263
CGGTTGTTTACGGTTGCGTGTACT_4	1.78851782267612	0.0722576739494142
AGCACTTCGCCATAACTCCGAGTT_4	1.67728239798302	-0.0324734
CCGTAAGAGACTTAGGCACTGACA_4	1.9608764309787	-0.0256936
GAACATCGCTTGCTGTACATAGGC_4	1.68811188943909	0.013059683120888
ATGCACGACGACCATTCGAACTGT_4	1.51772447123193	-0.0215806
ACGACTTGCATTCGGTAAGAGCCA_4	2.17449091606635	-0.145871
TCGCTGTTAGGAGGAACAAGGTCT_4	1.83551143541323	-0.0519111
GTTCTCGTTGCAGGTATCGTGGAT_4	1.96308707655722	0.064706876590532
AGTTCGTCCGCTAGTACCAGTGTT_4	2.20034271840862	-0.0640429
AGCACTTCACGTGATGAACTGGTG_4	1.93802309074799	0.0114194615306924
ACTGAGGTCAACCTAGTAGCCGAA_4	1.95041912024346	-0.0409014
CACCTGTTTGCCATTCTAGCCGAA_4	1.88244080307039	0.0404054056172337
TATCGGTCGTCGGTAACATAACGG_4	1.6909836714936	-0.103673
CGGCTAATAGTGCAGTAACCTCCT_4	1.97947784520612	-0.0916989
AACCGTTCCATTCGGTACCTTCTC_4	2.11925475462683	0.0208399602632292
CCTTGTAGCTGGAGTACTGGTTCT_4	2.02858827141816	0.0137119574250681
TGTGACTGAGTGCAGTAGGCATAG_4	1.6332151549849	0.0823515145228999
GCTATCCTCGTTATGCTCGTGGAT_4	2.0801544259027	-0.101416
TGTGACTGAGGCTTCTTCGTAGTC_4	2.13566004798796	-0.031897
GTTGACCTCTCAGAGTACCTTCTC_4	1.66057997155876	0.0741011256396129
CACCTGTTCGTCAATGCGAGTATG_4	1.99065924536274	-0.132221
GTTGTTCGGCCATAACTATCAGCG_4	0.961105909924403	-0.0279186
GTGAAGTGGTCGGTAACGGAATAC_4	1.80977194021279	0.0723286516161751
GATTGCTCCAACCTAGAAGGCTGA_4	2.22615764284322	-0.10902
AAGCACTGCATTGCCTACCTTCTC_4	1.87309895211648	0.0375933740929281
AGTTCGTCCACAAGTCGAGCTCAA_4	2.06645724147322	-0.0439049
AGAACGAGCTGACACAAACGGTCA_4	2.11256783548648	-0.0831247
GCACAACTCTCATTGCCCAGTGTT_4	1.86062150704497	-0.0133845
TACGCCTTGTAGAGCATGCACCAA_4	0.902362079688343	-0.0166797
AGCGTGTTGCCTTGTTTAGGATGC_4	1.86047939664116	0.00867266751353912
TATCGGTCTGATCGGACCAGTGTT_4	1.85228740177209	0.0148675732903444
CAATGTGGCAGAATCGGCAATTCG_4	1.94068820432034	0.0365505829902728
ACGGAACAGAACGCTTCTCAGCTA_4	1.83979664583694	0.0211051248562782
CGTGTGTACATTCGGTTCTCCGAT_4	1.73483305258983	0.0186171407091005
CAATGTGGAAGGACACACATAGGC_4	1.88077630679944	0.0733839005128545
CGTGTGTACTGGAGTACTTCGTTC_4	1.95287637784179	0.0451992004284662
ATGACGTCACCAGCTTCATAACGG_4	1.78305151195846	0.0848310857724792
CATGGCTAACGTGATGCTCAGCTA_4	1.91325063264235	0.0464551774469579
GTGAAGTGACCAATGCGCTGTTGT_4	1.82349987294589	-0.0667214
CTGTTGACTGATCGGATCCGAGTT_4	2.06533	0.00368064281502375
ACAGCTCATAAGTGGCTTGTCGGT_4	1.7841901261134	-0.0514925
GCACAACTCTCTACTCGTCTAGGT_4	2.17316914402032	-0.0880251
TCAGGCTTCCGACTATTTGTCGGT_4	1.58935371133661	-0.0766549
AAGCACTGCGTCAATGAAGAGCCA_4	2.1252607235371	0.0756129315629278
TAACCGGTTCTCTAGGCACTGACA_4	2.06437561656227	0.0110544955123891
ATGCCTGTAGGCTTCTTGTCCAGA_4	1.6383017702081	0.0142114990132001
TACGCTACGAACGCTTTGTCCAGA_4	1.90888602228625	-0.10953
TACGCTACCCAAGTTGAGCAGATG_4	2.23512927469165	0.0334695686436776
ATCGATCGTAGTTGCGTCACGTTC_4	1.92320399079184	0.022020418407894
GTAGGAGTTGTGCGTTTCAGACGA_4	1.91247747058779	-0.0667145
TGAAGACGTGATCGGATAGCCGAA_4	2.0397144950337	-0.0732997
CGTGTGTAAGTCGACACTCTGGTT_4	2.14490617706883	7.29757852787616e-05
ATATGCGCAGGTTCGAGCACGTAA_4	1.91225278195654	0.144287443175977
GATTGCTCCGATAGAGTTCTCTCG_4	1.8893495856239	0.0542665500350683
CTGATCGTTTGGTGAGTGCACCAA_4	1.84496884468658	-0.0631479
TCGCTGTTCACAAGTCAGGCATAG_4	1.86253953650033	0.0540409341744615
CGACGTTATTGATCCGGCACGTAA_4	1.90559347360503	-0.0372879
TGGACTCTCAGTTCTGAACGGTCA_4	2.11910979836226	-0.0218544
GATGTGTGTACCAGGATGCCTCTT_4	1.65457354304332	-0.0468212
TTCCAAGGGAGATGTCTCGAGTGA_4	1.71756438443134	0.0767942514540876
GAGCAGTAAGCTCCTATCTGAGAG_4	1.80484510696456	-0.0352865
AACTGAGCCATTCGGTACCATGTG_4	1.82460793553155	-0.0418368
AACTGAGCTAGTTGCGAGCAGATG_4	1.75968601783001	0.0208492119193907
AGAGTAGCAGAAGCGTTTCAGCCT_4	1.74154414169949	0.0780488369492873
CTTCGACTCTGGAGTAACCATGTG_4	2.08253243932686	0.0375713240174362
CGTGTGTACTGGAGTACCAGTGTT_4	1.92558106999495	0.0962195980182739
GATCGAGTCTAGGCATCATCTACG_4	1.94098317133302	-0.0490039
ATCGATCGATTCGAGGACGTCGTA_4	2.09815978393536	-0.0147301
CCTTGTAGCCTACTGACTCTGGTT_4	1.8197059115991	0.00629004872856348
TTGGACGTCTAGGCATCGTGTACT_4	1.93910397761293	-0.0337823
CGTGTGTAATCGGTGTAGCAGATG_4	1.90272534897719	-0.00791269
TTGCGAAGTCTCGCAAGCGTTCTA_4	1.86232319182173	-0.111562
ACGGAACAAGGTTCGATTCTCTCG_4	1.58956731679418	-0.015077
ATATGCGCCGACCATTTGCCTCTT_4	1.84730834362109	0.0625005016677029
TTCGTTGGCAGAATCGCATCTACG_4	1.73300518956443	-0.082443
CAACACCTCTAGGTGAGATTGGAG_4	1.65886879161499	0.0033159290235121
GCGTCATTGATGCACTCGTGTACT_4	1.55378038428889	0.040969353449709
AAGCACTGCTCAGAGTCGGAATAC_4	2.08558965866277	-0.0364175
ACGACTTGAGGTTCGACCAGTGTT_4	1.77279351847127	-0.120125
CTGATCGTGATAGCGATTGACAGG_4	2.11025883004542	-0.0927247
CCTTGATCCGGATTGAGCGTTCTA_4	1.97853744734779	-0.0143247
TCGCTGTTGAATCGTGCAGCGATT_4	2.13649452718355	-0.0529331
TTGCGAAGCGTTATGCAGGATCTG_4	2.02908495852904	0.0191161669310947
CACCTGTTCTCAGAGTCGAACTGT_4	2.06195158549585	-0.175966
TTCGTTGGGTCGGTAAACCGCATA_4	2.1157508974629	-0.050306
TTCCAAGGAATGCCTCTCGTAGTC_4	2.22297374956967	0.0403350514851816
GCGTCATTACATTGCGGCTTAGCT_4	1.83338163488565	-0.0733789
ATCGATCGGTCGGTAAACTGTGTC_4	1.43436941932678	0.0543710527772479
CCTTGTAGCTAGGTGACGAGTATG_4	1.49188691683887	0.0339472685165801
CGCAATCTCAGTTCTGAGGCATAG_4	2.06358985131545	-0.0449064
ACGTTCAGATTCGAGGCACTGACA_4	1.79067145874985	-0.0219908
CATACCACCTTACAGCTGCACCAA_4	1.88189558061239	-0.106946
GACGATCTAGTCTGTGGCGTTCTA_4	2.11418851901598	-0.0975406
GTTCTCGTATGGTTGCTACACGCT_4	1.91250805946274	0.0698727349337847
CGGCTAATGCTCTGTATGCCTCTT_4	1.96889264234776	-0.115937
ATCACACGTGTGCGTTCTCTGGTT_4	1.81995596099085	0.138628313579245
GACGATCTAAGGACACAGGCATAG_4	1.70317111848132	0.0649406201085081
CAATGTGGCGTCAATGGCTTCTTG_4	1.65538335096044	0.0873613667421024
CGCTCTATTTGATCCGATTCTGGC_4	1.97498262547269	-0.0400324
TCGCTGTTAATGCCTCGCAATTCG_4	1.98281123944958	0.00570911649185896
TTGGACGTTCTAACGCTTCTCTCG_4	1.70789	-0.00589177
TACGCCTTTGCCATTCTTGACAGG_4	2.01561169927653	0.0743608985097259
ATATGCGCCAGAATCGACATAGGC_4	1.74458550491213	0.0741260244800352
CGCAATCTCTCATTGCAACCTCCT_4	2.0117663421335	-0.0134419
AGAGTAGCGTATGCTGAGCAGATG_4	2.00172666429699	-0.0216089
ACCACGATTAGTTGCGGATTGGAG_4	2.34477090749073	0.0187216720679367
TTGGACGTTTCAGGAGCATGGAAC_4	1.5348647707599	-0.0630831
CACTAGCTCTAGGCATTCGTAGTC_4	1.73497150661283	0.0211132346117033
ACAGCTCAGAGATGTCGTATTGGC_4	1.78021902241567	-0.0722235
CGTGTGTACTCAGAGTTGCCTCTT_4	1.5794904426441	-0.000326513
TGAAGACGATTCGAGGACGTCGTA_4	1.64064950229921	0.119817173694519
AGAGTAGCGAACGCTTTCCGAGTT_4	1.91877797047313	0.0138896642001417
GATCGAGTGCCTTGTTTCTCCGAT_4	1.82118804937472	0.153339744018897
TATCGGTCTCTCTAGGCGAACTGT_4	1.71003550580837	-0.077576
TTGGACGTTTACCGAGACCATGTG_4	2.0297352580419	-0.107538
GATTACCGATTCGAGGGTATTGGC_4	2.02153440323436	-0.12301
GTAGGAGTACGATGACACGGTCTT_4	1.57387490857259	-0.0225216
GTTGTTCGCAATCGACCTTCACCA_4	1.44092351068079	-0.0067543
CGGCTAATCGCTAGTATTACGGCT_4	1.70062	-0.0583915
AGTTCGTCTTGGTCTCTTACGGCT_4	1.90750435249664	0.0488861849806369
TCAGGCTTCTCATTGCGCTGTTGT_4	1.7737731396576	0.0258880570254388
TGGCATGTCTCAGAGTCTGCGTAT_4	1.09152448026641	0.200641634278629
TAACCGGTGTCGGTAATCGACATC_4	2.05559420658153	0.105228469181601
ATGCCTGTTCTCTAGGCATAACGG_4	1.88158780863436	-0.0844645
GTCGAAGACTTGCTGTGCGTTCTA_4	1.31766340795475	0.0551018646635135
CTTAGGACTCCGTATGCTTCACCA_4	1.57722018032791	0.00863821239213025
GAGACGATACGATGACCAGCGATT_4	1.7168015330633	0.0277995229060823
GCAAGATCGTCTGATCTCTGAGAG_4	1.84498674921568	0.0786769792925295
CGCATGATTCTCTAGGGCTGTTGT_4	2.06345457361563	-0.057679
GTGAAGTGAGGAGGAACAGTCTTC_4	1.90791979017322	0.0477181833043813
GCAAGATCTCGAACCATCTCCGAT_4	2.02188463323652	-0.00963053
TGAAGACGCTTACAGCCAGGTATC_4	2.04773705513788	-0.0934953
CATGGCTACTCATTGCCTCAGCTA_4	1.65035040052253	0.0247329383905425
ACAGCTCAGACTATGCTTGTCGGT_4	1.99332255971765	0.0136561073653554
TTCGTTGGCCAAGTTGACAGCAAC_4	1.97043183095928	-0.0964182
CTTAGGACTCGAAGGTTCACGTTC_4	2.05323829973866	-0.050806
CTTGTCGATGGAGAGTGCTTAGCT_4	2.11715338041365	-0.106824
CAGTCCAATGGAGAGTGCGTTCTA_4	2.04277384475886	-0.0430115
GAATCCGAAGTCGACATTCAGCCT_4	1.85372739049866	0.000236641574124147
CTTAGGACACCAGCTTTCAGACGA_4	1.72539643249531	-0.0461315
GAAGTTGGTGTGAAGCACGTCGTA_4	2.07282589225511	0.0484555107484048
CTTGTCGACTCTACTCTGCACCAA_4	1.74495142556317	-0.0290174
AGAGTAGCAGCTCCTAAGGCATAG_4	1.99133539595242	-2.27366e-05
GAAGTTGGGAGATGTCCAGCGATT_4	1.93006829143067	-0.0253353
TTGCGAAGTTGGTGAGAGGATGGT_4	1.96745873887728	-0.0542923
AGAACGAGGTCTCCTTTATCAGCG_4	1.41347076233129	0.130227364121473
TGCTTCCAACTCGTTGACCTTCTC_4	1.83065758952886	-0.0554234
GACGATCTAGCTCCTAAGCAGATG_4	1.99361712277396	0.0030296479221846
ACAGCTCAGTCTGATCCTGCGTAT_4	1.8437671295527	-0.0558207
TATCGGTCGACTATGCGTAGCATC_4	2.14063567431926	-0.0666464
TGGACTCTACTCGTTGTTGTCGGT_4	2.05192210220315	-0.119578
AACCGTTCACCAGCTTCATAACGG_4	1.98503724256559	0.10723824011416
GCAAGATCTTGGTGAGTATCAGCG_4	1.64831374352674	0.0488858990370776
CTTAGGACCAGAATCGCATAACGG_4	1.7917401802773	0.00465022023078826
CTTCGACTTTGGTCTCAACCGAAG_4	1.88746477649868	0.0970103323701954
AAGCACTGCCGACTATACCTTCTC_4	1.42580447238406	0.0365351514496497
ACAGCTCATCTCGCAATTAGGTCG_4	1.88505982802799	0.0994209918770833
GTCATCGAAGGAGGAAGTGTTCCT_4	1.76451512531865	0.0131388616975933
ACTCTCGAACCAGCTTAGGCATAG_4	1.50727469595195	0.0139337231942973
ATCCAGAGAGTCTGTGCTGGTTCT_4	1.79271047353772	-0.058875
GAGACGATCCTACTGACAAGTGCA_4	2.02432062026895	0.0190211410601557
AGCACTTCGATAGCGAACTGTGTC_4	1.80616106211009	-0.0205034
CATACCACTGATCGGACGAACTGT_4	1.12510423001196	0.0802865696562579
TTCGTTGGCACAAGTCTAGGATGC_4	1.67538129007207	-0.101231
CCTTGTAGTGTGCGTTAACGGTCA_4	1.6340714567971	-0.0878668
GATTACCGCAACCTAGAAGAGCCA_4	1.92225483694811	-0.0412869
CGTGTGTACTGACACAAACCTTGG_4	2.01567432932187	-0.0393006
CGGTTGTTTGCAGGTAGCCAGTAT_4	1.64469424266718	0.0493416566577635
TGGCATGTCTATCGCACTAACTCG_4	2.18662878674543	-0.0257515
CCTTGTAGACGATGACACGGTCTT_4	2.05068687016937	-0.10139
AGTTCGTCCACAAGTCTACACGCT_4	2.07810683921827	-0.0741953
ATGCACGAAATGCCTCCTGCGTAT_4	0.918695558777906	0.200449082611621
GAGCAGTAGACTTAGGTGGTCCTT_4	1.99832098851766	0.109936717529591
GCACAACTAGGAGGAACTGGTTCT_4	2.11150679272304	-0.0288449
GAGCAGTAGCCTTGTTGACAAGAG_4	0.981944044718419	0.131013581808729
ATCACACGTGCCATTCAAGAGCCA_4	2.05687812101868	-0.153103
CATGGCTATTCAGGAGACGTCGTA_4	1.78823232539186	0.0651934747283981
ACTAGGAGTCTAACGCGTCTAGGT_4	2.33996128797264	-0.0597757
TGGTACAGCCGACTATTCTGCTCT_4	2.2201435927894	-0.0666654
ACAGCTCAATCGGTGTTTACGGCT_4	1.80962948430032	-0.125045
GTTACGCACAATCGACTCGAGTGA_4	2.12694829671023	-0.0864536
GATCGAGTGACGAATGCATCTACG_4	2.10369975130929	-0.049041
TCAGGCTTATTCGAGGGTAGCATC_4	2.08598872629409	-0.0294473
GATTACCGTTGGTGAGGAGCTCAA_4	2.02738546951026	-0.0490438
TCGCTGTTAATGGACGCCAGTGTT_4	1.80997145509204	0.0479659364222805
TGAGCTAGAGGAGGAAACATAGGC_4	2.01122732109389	-0.125583
GAGCAGTAAGTGCAGTCTTCACCA_4	2.05959366012568	-0.090679
TTCGTTGGCGCTAGTAGTATTGGC_4	1.76941512283931	-0.0630636
AACGTCTGAATGGACGCATCTACG_4	1.83917528555443	0.0993037933931433
ATGCCTGTTCTCTAGGCGTGTACT_4	2.07005731282798	0.0186064234711368
CAGTCCAAAATGGACGTCGAGTGA_4	2.13976051954669	-0.0247046
CAGTCCAATGCCATTCACCATGTG_4	2.05196501912286	0.0243984289344858
GTTGTTCGTCGAAGGTGCTTCGAA_4	1.99896826600659	0.0686484488445325
TTGGACGTTGTGAAGCACATAGGC_4	1.85505920230691	-0.029411
TAACCGGTGTCCTAAGACCGCATA_4	1.84092052579662	-0.13949
ATGACGTCGTATGCTGACTGTGTC_4	1.77490657593417	0.0278896368479585
CAGTCCAATACATCGGAAGGCTGA_4	2.01971850119107	-0.10305
ACTCCATCACTCGTTGCCTTCCTT_4	1.63447122106125	-0.0592341
GTTACGCACTAGGTGACGTAGGTT_4	2.08541798854547	-0.143715
ATCCAGAGTGTGCGTTCCAGTGTT_4	1.86809217123039	-0.192265
CATACCACCTAGGCATTGCGTAGA_4	2.18756076025236	-0.0769732
GACGATCTTGGAGAGTAGTCAGGA_4	2.09862964349841	-0.0486727
ACGTTCAGCATTCGGTAAGAGCCA_4	2.07872528290523	-0.139502
TTCGTTGGGCTCTGTACTTCACCA_4	2.16402178583686	-0.00789696
GTTGACCTCAGAATCGTCTGCTCT_4	1.86034463842601	-0.0140476
CTTAGGACAGTCGACATAGCCGAA_4	2.06680660601513	-0.0847426
CTTAGGACAGGTTCGATGCACCAA_4	1.70253833366123	-0.0278073
GAAGTTGGACGTGATGTGTCCAGA_4	1.80190863017276	-0.00256014
ACTCTCGACAGAATCGCATCTACG_4	1.75019447866423	-0.0632166
AGAGTAGCCGATAGAGGCTTCTTG_4	1.7734542026386	-0.0173771
TGGTACAGCTCATTGCGTTCATGG_4	2.01823042158557	0.0581391631420101
ACCACGATACTCGTTGTCGTGGAT_4	2.03430617479052	-0.0803572
GTGAAGTGTCCGTATGCGAGTATG_4	2.05477787839758	0.0365064954321819
CCTTGTAGTCGAAGGTAACTGGTG_4	2.0275677811116	-0.125979
CGGTTGTTCTCAGAGTTGCGTAGA_4	1.79584126720355	-0.0779416
TGAGCTAGCGCTAGTAGCGTTCTA_4	1.91245339228894	-0.0424193
GATTACCGAATGCCTCTTGTCGGT_4	2.0143684637518	-0.0510695
CGCAATCTCATTGCCTCATAACGG_4	1.83295194220165	-0.142037
GTTGTTCGCTAGGTGATGTCCAGA_4	1.70852058023497	0.0505459283551568
CCTTGTAGGCCATAACAACCGAAG_4	1.7975912990024	0.0326180214556275
CTTGTCGAACATTGCGCGATGCTT_4	2.28404835238712	0.00190622451551295
AGTGGATCTGTGAAGCGCCAGTAT_4	1.86289426191607	0.0466479726495523
ATCCAGAGCGATAGAGCCAGTGTT_4	1.76034828089103	-0.0903264
CGGCTAATTACATCGGAGCAGATG_4	2.1748147266301	0.0281827968040812
GAAGGAAGTCGAAGGTAAGGCTGA_4	1.92056529386584	-0.0204572
AGAACGAGCTGACACACTACAGTG_4	1.9751374840706	-0.0568024
AGAACGAGAGAAGCGTCGAACTGT_4	1.72700624668426	-0.0185145
TTGCAGACTGATCGGAACGGTCTT_4	2.09251811710159	0.0114248367364682
CGACGTTAAGTCGACACAGCGATT_4	1.96439557593185	-0.0401945
CTGTTGACAGGTTCGAGCGTTCTA_4	2.05330844997245	-0.049352
GTCGAAGAGAATCGTGCGAGTATG_4	1.92270102870522	-0.102888
TGGACTCTACTCGTTGTCTGAGAG_4	1.95781412767852	-0.073724
CGGCTAATCGGATTGAGCCAGTAT_4	2.07843266530896	-0.0499148
GATGTGTGCTCAGAGTCTCTGGTT_4	1.88144487210664	-0.0871388
CAACACCTCGATAGAGTTAGGTCG_4	2.0064993977589	-0.220141
TTCCAAGGCGATAGAGTTGACAGG_4	1.92859669417201	0.014566638344977
AACGTCTGGTCGGTAACCTTCCTT_4	1.64331191880303	0.0647872339453597
ACTCTCGACAACCTAGTCACGTTC_4	1.63437673095163	-0.0419173
GAAGTTGGCTCTACTCAGGTCACT_4	2.08530421377536	-0.0755055
CGCAATCTAGTCGACATTGACAGG_4	1.79245	-0.0861241
GTCGAAGAAGTCTGTGCAAGCAGT_4	1.93201941162426	0.0466494747526756
GTCATCGACGAGACTACGAACTGT_4	1.79480806923562	0.0274934784761713
AGAGTAGCCAATCGACTCAGACGA_4	1.92184596589757	-0.0973842
GAAGTTGGTACGGTTGATTCTGGC_4	2.02598569377606	-0.0459434
CGACGTTAAGGTTCGAAACCTCCT_4	1.78049908035184	-0.0544622
AGAACGAGGACTTAGGGTTCATGG_4	1.99898257003469	-0.0343281
TATCGGTCAGTGCAGTCGAACTGT_4	1.48032773498074	0.050635588722122
GTAGGAGTGCCATAACCAAGTGCA_4	2.10302534837146	-0.0495596
TAACCGGTGAAGAGGTTTAGGTCG_4	1.14171555014316	0.0871580166998602
TACGCCTTGAGATACGACCGCATA_4	1.70926715287254	-0.014891
TACGCTACCGTCAATGTTCAGCCT_4	1.9501890237485	-0.130734
ATGACGTCGAATCGTGTTCTCTCG_4	1.78992406644425	-0.0733599
GTCGAAGATCTCGCAATTGACAGG_4	1.61746622576569	0.0868744971131232
GCAAGATCTACCAGGACTAACTCG_4	1.11158513023594	0.141643632276502
GAATCCGAACCTAAGGCTAACTCG_4	2.09515624605831	-0.0364496
ACAGCTCAGTCAGTTGGCTTCGAA_4	1.90160022581323	-0.0592104
CGACGTTAGTCGGTAATCCGAGTT_4	2.03864628768345	-0.0147326
ACCACGATACCTAAGGGACAAGAG_4	2.33797387166414	0.123589454278729
ATGCACGACGAGACTAATGGAAGG_4	2.39252494886022	-0.117644
ATGCCTGTCAACCTAGACCTTCTC_4	2.17298235031992	0.100851557485445
TTGGACGTCGACCATTAACCTCCT_4	1.70947102593819	0.0551518339191778
GAATCCGACTGACACAACGGTCTT_4	2.27533603651929	-0.0596285
TGGTACAGCTAGGTGAACTGCTAG_4	2.32611788094908	-0.0607727
CTTAGGACAAGGACACTTCTCTCG_4	2.34096325728386	-0.0184841
ATGACGTCTTCAGGAGGCTTCGAA_4	2.02211456086926	0.0514695251544303
CGTGTGTACGTTATGCCATAACGG_4	1.71426150477072	0.0575087876123538
TTGCAGACTCTCTAGGGATTGGAG_4	2.09570883521446	-0.0196328
ATGCCTGTCCGACTATCTGCGTAT_4	2.0921439680563	0.0681393502747657
CAGTCCAAAGTGCAGTTCGTAGTC_4	2.58062818135788	-0.0604564
GTCATCGAGCTCTGTACGAACTGT_4	2.06214267737918	-0.0919575
TTGCAGACTCGAAGGTCATGGAAC_4	2.33299304847689	-0.0157572
CATGGCTAGAATCGTGAACCTTGG_4	2.05977405499518	0.034761235993591
CTTCGACTCGAGACTAGCTTAGCT_4	2.03672736306898	0.0261761110552505
ACGACTTGAGGAGGAACTGCGTAT_4	1.9906022378941	-0.124894
CGCTCTATCCGACTATGTATTGGC_4	2.25352076157545	0.00460371667783155
GAGACGATCTCATTGCCACCACTA_4	2.23761052311558	0.0155163693118775
CGCTCTATCCTACTGATCGTGGAT_4	1.64911459667257	-0.0752285
GTCGAAGATGATCGGACGAACTGT_4	1.8552	-0.0905129
TTGCGAAGAGAAGCGTTGCCTCTT_4	2.25933914606229	-0.0611496
ATCCAGAGCGAGACTACAGCGATT_4	1.80172569812581	-0.0719325
CCTGATTGGCCTTGTTCATGGAAC_4	2.09281348128083	0.109347364873106
CGTGTGTAACCAATGCGCAATTCG_4	1.72028186606001	0.0162195613187068
GTGAAGTGACGTGATGCTACAGTG_4	2.57378302697761	-0.0294488
TTGCAGACGAACGCTTTCAGACGA_4	2.47221669197082	0.0113931990830798
GACGATCTGTCGGTAACGATGCTT_4	1.5239210496461	-0.00396811
ACTAGGAGACTCGTTGTAGCCGAA_4	2.39990570545569	-0.0263979
GAACATCGTCCGTATGCTTCGTTC_4	2.03250804371312	-0.0353785
GCAAGATCATCGGTGTTTGACAGG_4	1.94317735036597	0.0293861959497778
GAGCAGTACTCATTGCGTTCATGG_4	2.13518714205426	0.00468936317665528
GTTGACCTTAAGTGGCGCCAGTAT_4	2.26962155846276	-0.0169618
CGACGTTATAAGTGGCTTAGGTCG_4	2.19455658892082	-0.0679103
CACCTGTTCCAAGTTGTTCAGCCT_4	2.15011774850406	-0.0572426
GTCATCGATGTGCGTTAGGATCTG_4	2.43311301208455	-0.0836732
TGGTAGCTAGGTTCGAACGGTCTT_4	2.4803531533164	-0.0896219
CCGTAAGATCTCTAGGCCTTCCTT_4	1.98971497648706	0.00257731377906179
AAGCACTGATGGTTGCTGCACCAA_4	1.75375508671689	-0.0620676
TATCGGTCTTACCGAGAGGCATAG_4	1.97427526226306	-0.0655617
ATCCAGAGGACTATGCTGTCCAGA_4	2.28041926830978	0.0641368341482448
GAAGGAAGGAAGAGGTAGGCATAG_4	2.04517450128887	-0.0605503
TGCTTCCAGTCTGATCTGGTCCTT_4	1.00446050112033	0.166473478402763
CCGTAAGACTGACACAGCTTCTTG_4	2.60026212062658	-0.00322609
TGGTACAGGACTATGCAGCAGATG_4	2.10619909565457	-0.125989
GTCATCGAAGTGCAGTGATCGTAC_4	1.88783474888704	-0.0268979
TTGGACGTGTCAGTTGGTGTTCCT_4	2.09905473887564	-0.0956727
AACTGAGCTGATCGGAGCAATTCG_4	1.54258942981673	0.218195527775932
AACGTCTGGACTTAGGTCTGCTCT_4	2.07178907704039	-0.00779759
TATCGGTCTACCAGGAACCATGTG_4	2.15639190055785	0.0267152095074249
CAGTCCAACGAGACTACCATACGT_4	2.25923096107265	-0.0497896
TACGCCTTGATACTGGTCGACATC_4	2.41530448930856	-0.0366104
GATGTGTGTGAGGTGTCATCTACG_4	2.46249611408875	0.007838436609685
GTGCCATAACGTGATGTCTCCGAT_4	2.06881959557205	-0.177397
AAGCACTGTACCAGGACAGGTATC_4	2.43633057881181	-0.0253325
TGTGACTGCTCATTGCCATCTACG_4	2.23103143051417	-0.0546675
ATCGATCGCCGACTATCTCAGCTA_4	2.4304264390156	0.0327269045323278
GAATCCGACATTGCCTCATGGAAC_4	2.10963788751352	0.0347601506457265
ACAGCTCAACCAGCTTCGTGTACT_4	1.67499605381426	-0.0515598
TTCGTTGGCAACCTAGAGGATGGT_4	2.31785813814653	-0.0234095
GATTGCTCGTCAGTTGCAAGTGCA_4	1.86924863716561	0.0405773356418394
GTTGTTCGTTGGTGAGGTATTGGC_4	1.6730161023217	0.0104079113355784
ACGGAACACGACCATTTTGTCGGT_4	2.37943918942018	0.00271726232032615
ATCCGGTACTATCGCAAGCAGATG_4	2.42340185362742	-0.0417779
CTTCGACTTACGGTTGAGCAGATG_4	2.19209696835433	-0.0629669
GAAGTTGGTGGAGAGTAGGATCTG_4	1.89620888270282	-0.0967958
TGGTACAGAATGCCTCATGGAAGG_4	2.41402615307056	0.0334590970741548
ATGACGTCCCAAGTTGGCTTCGAA_4	2.35413654936366	-0.0289901
GTTGTTCGGTCTCCTTCAGGTATC_4	2.28587478616751	-0.0325891
GTGCCATACTCTACTCACATAGGC_4	2.6295402953024	-0.0910799
GCGTCATTAAGGACACTGGTCCTT_4	2.12637415131098	-0.11614
CGACGTTAAATGCCTCACCATGTG_4	1.51027474235119	0.00462312331202436
TTGCAGACTTGGTCTCTTACGGCT_4	1.02804648426227	0.107905781962948
GTTCTCGTAGCTCCTACTTCACCA_4	2.43224073272956	-0.0824229
CCGTAAGACTTACAGCTCACGTTC_4	1.82195880178071	-0.104094
TTGGACGTCGGATTGATAGGATGC_4	2.04652	-0.104604
GCGTCATTCAACCTAGAAGAGCCA_4	1.99907002200631	-0.0850964
GTGAAGTGGACTTAGGCGGAATAC_4	1.57957779310498	-0.00512777
CTGATCGTCATTGCCTAAGGCTGA_4	1.57883023366775	-0.0845145
CTGATCGTCATTGCCTTAGCCGAA_4	2.03226022333285	-0.0589109
TTCCAAGGATGGTTGCTAGGATGC_4	2.20121169413057	0.0643496451932805
CGCATGATCAGTTCTGTTACGGCT_4	2.14557272928231	0.0727390372170577
TAACCGGTCTCAGAGTAGGTCACT_4	2.47521957610347	-0.016071
AACTGAGCGCTCTGTATTACGGCT_4	1.51307465174475	-0.0106466
TTCGTTGGTCGAACCAGAGCTCAA_4	2.00393958111484	-0.0232564
CGCTCTATGACTATGCATGGAAGG_4	2.39622402576767	0.0258917263291721
ACGACTTGCCAAGTTGCCTTCCTT_4	2.41529742785857	-0.0294588
CCTTGATCTGCAGGTACAGTCTTC_4	2.27488984427884	-0.016578
ACTAGGAGGACTTAGGTCGACATC_4	2.21286849101789	-0.0172522
ATCGCCATACGATGACCGATGCTT_4	2.32435783215683	-0.0761677
TACGCTACTGCAGGTATGCCTCTT_4	1.89087003628874	-0.0660528
ATCGATCGCATTGCCTGCTTCTTG_4	1.30338056145122	0.02037176767346
TAACCGGTGAGATACGCTGGTTCT_4	2.50255976165908	-0.0474805
CAATGTGGTTACCGAGCAAGGTCT_4	1.90339823975176	0.0589479293397997
TGGTACAGGCTCTGTACAAGCAGT_4	1.7349513766314	-0.0356099
GCTATCCTGACGAATGCTGCGTAT_4	1.83451049313627	0.0118161851261677
CCGTAAGATCTAACGCTCGTAGTC_4	2.36507753883482	0.0801342114414943
GTTACGCAAGGTTCGAGCAATTCG_4	1.87483249715538	-0.103869
CTTGTCGACGCTAGTACGATGCTT_4	2.37753419328116	-0.0349862
TTCGTTGGGAGATACGTCCGAGTT_4	2.47408277689846	-0.0633189
ATCCGGTACGATAGAGGCAATTCG_4	2.18919871161363	-0.02419
ATCACACGCTGACACAGCTTAGCT_4	2.5576972581162	-0.0523439
GTGAAGTGCCAAGTTGCTTCACCA_4	2.32690779733548	-0.0496449
CGCAATCTAAGGACACCTGCGTAT_4	1.99272795051877	-0.0136641
GAATCCGAAGCTCCTACGGAATAC_4	2.49256407950495	-0.101873
AGCGTGTTACCAGCTTTTAGGTCG_4	2.03465096470253	-0.0757017
TCGCTGTTGTCCTAAGGATTGGAG_4	2.32734995283552	-0.130969
GCGTCATTGCCTTGTTTTACGGCT_4	2.4509422243753	-0.0689675
ATCACACGGCCTTGTTTCTCCGAT_4	2.33042195415099	-0.0455204
CCGTAAGAGCTGGATTACCTTCTC_4	2.25525523133978	-0.115536
AGTGGATCGCTGGATTTCTGCTCT_4	2.01970792513662	-0.0671426
TACGCCTTTCGAACCATGCCTCTT_4	2.03269309296057	-5.89823e-05
TGTGACTGGATACTGGAACCGAAG_4	1.8086483580843	0.0565412166092007
ACTGAGGTCTCAGAGTTCTGAGAG_4	2.31289514436709	0.0330821718000961
TTGGACGTACCAATGCGCTTAGCT_4	2.12716216892467	-0.16467
CGGCTAATACGTGATGGCATACAG_4	1.6405416936724	-0.0970829
GACGATCTCTCAGAGTCCTTCCTT_4	1.68483803715585	0.0667158562604537
GTGCCATATACGGTTGACTGTGTC_4	2.18625815847663	0.0153330979610362
CGGTTGTTCCTACTGACTGGTTCT_4	1.85217421777828	0.00506964595121967
CAATGTGGCGATAGAGGCGTTCTA_4	2.31190895485758	-0.0754234
AGTGGATCTACCAGGACACCACTA_4	1.78494011477908	0.115306209023148
TACGCTACACCAGCTTTCGACATC_4	1.89990931489321	0.107991544464144
AACCGTTCCATTCGGTACCATGTG_4	1.82798539630146	0.101120748909718
ATGCCTGTCGAGACTATGGTCCTT_4	2.08433739180977	0.0403462203873074
GATCGAGTAGGTTCGAAGGTCACT_4	2.21370754732452	-0.000463041
ATCCAGAGGCCTTGTTGCTTCTTG_4	2.22687752793546	-0.0924512
CAACACCTACATTGCGTACACGCT_4	2.36357088794889	-0.0529771
GATGTGTGCTAGGCATTGTCCAGA_4	1.89005343791693	0.0291020576043063
TGGACTCTTTACCGAGTATCAGCG_4	1.95552953657228	-0.0822807
TAACCGGTGTCGGTAATTGTCGGT_4	2.48577331781696	-0.118682
ACGTTCAGACGATGACTGCCTCTT_4	2.19720649218695	-0.0542327
TGAAGACGACCAATGCGCATACAG_4	1.94702214672977	-0.0553858
CAGTCCAAATCGGTGTCGGAATAC_4	2.40197828819049	-0.0570467
CGGTTGTTAGTGCAGTTCCGAGTT_4	2.37683118568016	-0.0603882
GAATCCGACGTACGAACGTGTACT_4	2.25542404241698	-0.0955007
CGTTGCAACATTGCCTTTCTCTCG_4	1.82655370769583	-0.0273146
GTTGACCTGTCGGTAACAAGGTCT_4	1.91778479739671	0.0740168416033548
GTTGTTCGCACAAGTCTCAGACGA_4	2.03886864257535	-0.0111797
TGCTTCCAGTCCTAAGGTCTAGGT_4	1.38478881238348	0.0292258635153658
ATGCCTGTCGCTAGTAGTATTGGC_4	1.89653272542706	-0.124719
GAAGTTGGTGGAGAGTTAGCCGAA_4	2.58747592880091	-0.103228
TACGCTACCTCAGAGTTCACGTTC_4	1.97306384073775	-0.0305233
CCTTGATCAGTCGACACCTTCCTT_4	1.8492864439842	0.0845035355811142
CACTAGCTAGTCTGTGTGCCTCTT_4	2.19334173107543	-0.0124144
AGTGGATCCCGACTATCGTAGGTT_4	2.32529305563299	-0.00481567
ATCCGGTAGAGATGTCCACTGACA_4	2.57234906393598	-0.0246161
ACTCCATCTGCCATTCTGGTCCTT_4	1.61074961954915	0.0105115191588825
AGTTCGTCTGAGGTGTTTGTCGGT_4	2.38985192882791	0.010556473013062
CGTTGCAAGTAGAGCAGCAATTCG_4	2.37471094455582	0.00217304986926292
ATATGCGCTTGATCCGGTGTTCCT_4	1.74346794657001	-0.0399432
GATTGCTCGATACTGGATGGAAGG_4	2.40729525912249	-0.0125979
GTTCTCGTGAGATGTCCAGCGATT_4	2.42175483585387	-0.0339268
TGAAGACGGAAGAGGTCTCTGGTT_4	2.03193626470325	-0.0170931
AGCGTGTTAGGAGGAAGCATACAG_4	2.49309869837104	-0.0796353
CGCATGATCGAGACTAAACCTCCT_4	2.17073719647083	-0.105846
TAACCGGTCTGACACAGCTTCTTG_4	2.43469080864278	-0.0725733
CCTTGTAGCGCTAGTAAGTCAGGA_4	2.2818616854088	-0.042149
GATTACCGTCGAAGGTTCCGAGTT_4	2.29914098933034	-0.032486
GATCGAGTTTGGTGAGAGGATCTG_4	2.39848905778759	0.00025506507346662
ATCGCCATGAAGAGGTAACCTCCT_4	1.71391947077582	0.00242662211388675
AACCGTTCCAACCTAGCAAGTGCA_4	2.03893324720931	-0.0227175
ATGACGTCCGATAGAGCATCTACG_4	1.70656139728292	0.0559440945600778
CTGATCGTACGTGATGCACTGACA_4	2.28176809357724	-0.00461707
TTGGACGTACTCGTTGAGCAGATG_4	1.82512795718916	-0.0187652
TGAGCTAGAATGCCTCCTCTGGTT_4	2.41201990776543	-0.0913865
GTGAAGTGCTCTACTCGCTGTTGT_4	1.82014716757867	-0.0402517
AGTTCGTCGTCGGTAACGATGCTT_4	1.87121931414309	-0.157605
TAACCGGTGTAGAGCACCATACGT_4	2.37284436990861	-0.0240451
CGTTGCAACACAAGTCACTGTGTC_4	2.01435768363031	-0.140811
AACGTCTGCGTACGAACAAGGTCT_4	2.24589018134422	-0.0720151
TCAGGCTTTGATCGGATCTGAGAG_4	2.13271443276897	0.0692432385273176
ACCACGATCATTGCCTCCAGTGTT_4	2.1812187211579	-0.138411
ATATGCGCAATGCCTCGTTCATGG_4	2.14094089771363	0.0504574555542657
CACTAGCTCGCTAGTAGCTTAGCT_4	1.7994867606184	0.0195866358626968
TCGCTGTTAGTCGACAGCGTTCTA_4	2.20204334341533	0.0091545084971548
TGGCATGTGATACTGGGTTCATGG_4	2.49077822100585	-0.00984514
CACTAGCTAATGCCTCAAGGCTGA_4	2.09771397638254	-0.0836068
CGCTCTATTCCGTATGACGTCGTA_4	1.67605020453765	0.0165214540989764
CACTAGCTCCTACTGAACGTCGTA_4	2.37419157735134	-0.0881503
CCGTAAGACCTACTGAATTCTGGC_4	2.08022784857603	-0.0352725
CCTTGTAGTGAGGTGTCTACAGTG_4	2.02683878547092	-0.0442335
CATACCACTACCAGGACAAGGTCT_4	1.73533415353992	0.15636927518771
ATCACACGGAACGCTTTCTGAGAG_4	2.04984874116985	-0.0328358
TTCGTTGGCAGTTCTGCTCAGCTA_4	2.35415928203026	-0.0244394
CCTTGATCGTCTCCTTCTGCGTAT_4	1.83667844603877	0.0638392879907634
AGCACTTCTACGGTTGACCATGTG_4	1.64191050094312	-0.00925533
TTGGACGTACCAGCTTCATAACGG_4	2.49272624775297	-0.0896687
ATGCCTGTCTCTACTCAGGATGGT_4	2.29364775800961	0.00380770322618773
GAGACGATCATTGCCTACCGCATA_4	2.0115022949109	-0.128021
AGCGTGTTACGTGATGAACGGTCA_4	1.89287831534687	-0.123228
TATCGGTCAATGCCTCTACACGCT_4	2.18925615927193	-0.0987934
AGCACTTCCGACCATTATTCTGGC_4	1.63139800281319	0.0248657102280386
AGCGTGTTGTCCTAAGTGGTCCTT_4	2.50835402135419	-0.0186115
GTCATCGAGAGATACGCTCAGCTA_4	2.24811728324311	-0.105488
ATGCCTGTTCCGTATGGTAGCATC_4	1.77815716434768	0.0117640954838962
TGAAGACGCGTACGAATCCGAGTT_4	2.32850067219043	-0.0272805
AGAACGAGCGAGACTAGATCGTAC_4	1.86080570265938	0.0748172720325889
TGCTTCCACACAAGTCGTATTGGC_4	2.25730754402335	-0.0682232
ATGCCTGTGAGATGTCTGGTCCTT_4	1.80403571764636	0.0106763162840269
AAGCACTGCTCAGAGTTTAGGTCG_4	2.40618719658187	0.0844155721405676
ATCGCCATACATTGCGTTGACAGG_4	2.04371919318783	-0.0678016
GTTGTTCGTACATCGGACGGTCTT_4	1.90871815238932	-0.059009
ACTCTCGACGAGACTAGTATTGGC_4	2.06727372290964	0.139415040871086
GTCGAAGACATTCGGTACCATGTG_4	2.42489900370969	-0.0421646
CGCTCTATTGTGAAGCAGGTCACT_4	2.56556289705811	-0.0695915
GTCGAAGACCAAGTTGGCATACAG_4	2.39853478016345	-0.0841955
CCTGATTGCGAGACTACTACAGTG_4	2.09222	0.00412382530202104
CGGCTAATAATGCCTCCCATACGT_4	2.03546110575653	-0.0579961
TGCTTCCACTCATTGCAGGATCTG_4	1.3975269308177	-0.149969
ATCCGGTAGAGATGTCTCCGAGTT_4	1.83254345121441	-0.0218419
TGAGCTAGTCGAAGGTTCTGAGAG_4	2.37787571606338	0.0732073699172658
TGCTTCCACTGGAGTATGCGTAGA_4	1.42527660025352	-0.0421632
AGTGGATCGTCGGTAACGATGCTT_4	1.98465582565176	-0.02615
GATAGGCTTCGAAGGTGATTGGAG_4	2.60906605920399	-0.115292
TCGCTGTTGAGATACGGATTGGAG_4	2.1729223788251	-0.06308
TCAGGCTTGCCTTGTTACTGTGTC_4	2.10223418038738	-0.00338033
AAGCACTGCCAAGTTGGCCAGTAT_4	1.98724420929921	-0.0426616
GTCGAAGACGACCATTACATAGGC_4	2.09568218607206	-0.107808
AGTTCGTCTCTCGCAACTGCGTAT_4	1.85346603478426	0.0484293597633151
TTCGTTGGTGTGCGTTAGCAGATG_4	1.69839954063127	0.10041413409593
CCTTGATCAGCTCCTATCGTAGTC_4	1.90099432293957	-0.00142605
TACGCCTTCTGGAGTATCAGACGA_4	2.39909158702715	-0.0414454
TGGCATGTTACATCGGACGTCGTA_4	2.01689993746075	-0.0752393
GTTGACCTAAGGACACTGGTCCTT_4	1.83721302670386	-0.086074
CACCTGTTGCCTTGTTCAAGGTCT_4	2.4968682169049	-0.0911139
ATGCACGACGGATTGAGTTCATGG_4	1.7594525060135	-0.0209765
ACAGCTCAGATAGCGAGACAAGAG_4	2.00324642432968	-0.167722
TGGACTCTTCGAAGGTCAAGTGCA_4	1.98018921031451	0.0606109742020181
GATTACCGCAATCGACGTATTGGC_4	2.46678157830413	-0.0230697
CACCTGTTCACAAGTCGTGTTCCT_4	1.97681487793854	0.0461015038832869
ACTAGGAGAGAAGCGTAGCAGATG_4	2.44050119393526	-0.106746
TAACCGGTTGAGGTGTAACCGAAG_4	2.50504207350705	-0.0577344
GTTGTTCGATCGGTGTGTATTGGC_4	2.16936614730813	-0.0903428
ACGTTCAGAGTCTGTGTTGTCGGT_4	2.10778112215887	-0.0896981
GTTGTTCGCTATCGCATCTGAGAG_4	2.4928273772093	-0.00616319
TCGCTGTTCGCTAGTAAGGATGGT_4	2.60717920065316	-0.0564329
GCGTCATTGAGGACTTTCGTGGAT_4	1.88696808407172	0.0321165263534802
GATTGCTCTCGAACCACTACAGTG_4	1.71545520411299	-0.00550228
CCGTAAGATCTCTAGGGCTGTTGT_4	1.76068759729062	0.0433987650663457
ACCACGATGAGATGTCTCGTAGTC_4	2.35043347614419	-0.0819235
CGTTGCAACAGAATCGTCAGACGA_4	2.06427919839249	-0.0636408
GTTGACCTGTCGGTAATCGACATC_4	2.03078806566384	-0.124398
AGTGGATCGAATCGTGAGGTCACT_4	2.49644079787647	-0.0587986
CTTCGACTCAACCTAGTCGACATC_4	2.22406279328214	0.0141817742380031
TACGCTACGAACGCTTTATCAGCG_4	2.48270955772852	-0.0521155
ATGCACGACTAGGCATTATCAGCG_4	2.49259644880543	-0.00366347
CGCAATCTAGAAGCGTCGAACTGT_4	2.02317737479293	-0.120417
CTTCGACTGTCAGTTGCTTCACCA_4	1.99788132713529	-0.0276542
CGTTGCAACGGATTGACTCAGCTA_4	2.34384602858524	-0.0190402
TACGCCTTACCAGCTTTTCTCTCG_4	1.81890448541424	-0.0194999
CATACCACCAATCGACTTCTCTCG_4	1.7289541839633	0.085620169584926
TTGCGAAGGCTCTGTAACGTCGTA_4	2.41580300521627	-0.00848744
AACGTCTGGTCGGTAAATTCTGGC_4	2.34313969639664	-0.0533748
AAGCACTGGCTGGATTATGGAAGG_4	2.30987578162179	-0.0228889
ACGGAACACCGACTATTCTGAGAG_4	2.47163197891498	-0.0840344
GTCGAAGATACCAGGAAGCAGATG_4	1.80554463379808	-0.00758843
CACTAGCTCGTCAATGCAAGGTCT_4	2.53985713529241	-0.0389899
AGAACGAGAGTCGACAGCACGTAA_4	1.74068779967904	0.0342920398772035
GCGTCATTCACAAGTCTGGTCCTT_4	2.60197088274253	-0.0154765
AGTTCGTCGTCTGATCACTGCTAG_4	1.81697849320352	0.0271926096221471
GTTGACCTAAGGACACTATCAGCG_4	2.25792329690131	-0.0363093
TCGCTGTTGAGATACGGCGTTCTA_4	2.64636318915087	-0.022322
GAAGTTGGTTGGTCTCTTCTCTCG_4	2.22495310684289	0.0615084891517478
CGTGTGTATAAGTGGCCAAGGTCT_4	1.57468816480848	-0.0609624
CTTGTCGAAATGGACGCGTAGGTT_4	2.49197726097891	-0.00868265
AGCGTGTTGTCGGTAATCGACATC_4	2.49585755846465	-0.068441
CCTGATTGAGGTTCGAAACCTTGG_4	2.15724996795515	-0.0146837
TACGCTACAGTGCAGTCACCACTA_4	1.91595740497838	-0.104847
AACTGAGCCCTACTGATGTCCAGA_4	1.85849860365909	0.0312708208100367
CCGTAAGATAAGTGGCCACCACTA_4	1.8187744053951	-0.0257311
TGGCATGTGACTATGCTCACGTTC_4	2.32739621972694	0.0735842137084809
CGACGTTATGTGCGTTCTAACTCG_4	1.43099304517327	0.0802920156636616
CACTAGCTCTAGGCATCAGGTATC_4	2.13869352728788	-0.0924121
GATTGCTCTGGAGTTGGCTTCTTG_4	1.64509656844445	-0.0374723
CAACACCTCTTGCTGTCAAGCAGT_4	2.48682406945658	0.0458266922119283
AGCACTTCACTCGTTGTTCTCTCG_4	2.1978108056795	-0.0519586
CGCAATCTTTGGTGAGTCTCCGAT_4	2.47093668774901	-0.0204132
CAACACCTTCCGTATGGAGCTCAA_4	2.26617822068991	0.00367355419869012
ACGACTTGGAACGCTTCAAGTGCA_4	2.0773137656001	0.0241055937178332
ACCACGATCGATAGAGAACCTTGG_4	1.91720900658381	0.0316491465584324
TCAGGCTTGAGATACGAACCTCCT_4	1.9500381606583	-0.0411664
TTCGTTGGAGGAGGAACCATACGT_4	2.26315799315134	-0.0344304
TTGCGAAGCTCTACTCCAGTCTTC_4	2.43785577797919	-0.0587597
CATGGCTAGTCTCCTTCGTGTACT_4	1.77397868657034	0.00447117983107942
TGAAGACGAGTCGACAGCACGTAA_4	2.08409835041242	-0.0697597
CGTGTGTACTCATTGCAGCAGATG_4	2.41124003916809	0.0188286145231318
CCGTAAGACGATAGAGCAGGTATC_4	2.47235881795305	-0.0373395
GAGACGATGTATGCTGACCGCATA_4	1.97066362280227	-0.0408783
TGGTACAGAGTCTGTGTACACGCT_4	1.83081344841726	-0.028238
TGAAGACGCCTACTGATTAGGTCG_4	1.54222916089668	-0.0696355
ACGGAACACTGGAGTAGTAGCATC_4	2.19702716055182	-0.0510473
CCTTGTAGCAATCGACTGTGGTAC_4	2.07576050556309	-0.0447554
ACTCCATCGCTCTGTATTCTCTCG_4	1.82217693211547	0.0156137454932503
CTTCGACTTACCAGGACACTGACA_4	2.2347655095309	-0.0215991
AGAACGAGACTCGTTGGATCGTAC_4	1.41695837722982	-0.0886627
GTTGTTCGTGTGAAGCCATCTACG_4	1.97459620080788	-0.0294867
TACGCCTTGAAGAGGTCGTGTACT_4	2.29642103647569	0.0421153771842682
CATGGCTATTGGTGAGTAGGATGC_4	2.36298569664767	-0.0103545
ATGCCTGTACGTGATGGTAGCATC_4	1.72055300723923	-0.00372452
GTCATCGACTTGCTGTGCAATTCG_4	2.37238757455574	0.00257565935579335
ACGACTTGGAATCGTGTAGCCGAA_4	2.66149562748258	-0.122097
CGGTTGTTACATTGCGCAGTCTTC_4	2.26925703274436	-0.0473358
GATCGAGTTGCCATTCACGTCGTA_4	1.57750262037861	-0.0162089
CACTAGCTAGTGCAGTCGTAGGTT_4	2.29094272891403	-0.105123
CGCAATCTTTGATCCGCTGCGTAT_4	1.71130126804309	0.0157042246933519
AACCGTTCCGAGACTAAACCTTGG_4	2.51409509099319	-0.0802522
GTTGACCTGCTCTGTAACAGCAAC_4	1.87809909086543	0.0313608584428621
CGCAATCTAGGAGGAAACCTTCTC_4	2.34644788907996	-0.0824311
ACTGAGGTTACATCGGTAGCCGAA_4	1.90902486804047	-0.00199804
AGTGGATCCTCAGAGTCATGGAAC_4	1.73865373157572	0.126978103050738
ATCCAGAGAGTCGACAACGTCGTA_4	2.5487303639604	-0.0222671
GCGTCATTGTCCTAAGCGATGCTT_4	1.89760066026907	-0.0313547
ACGACTTGCATTCGGTTAGGATGC_4	2.47912215289838	-0.0730994
CATACCACTCTCGCAAACCATGTG_4	2.05085867579192	-0.0929883
CGCATGATGACGAATGAACCTCCT_4	1.35377024281976	-0.0359092
ACTCTCGAGTCGGTAAGTATTGGC_4	1.34994452804057	-0.00906117
TGAAGACGCGGATTGAGCTTCGAA_4	1.75256042929296	0.000725833567066236
GAGCAGTAGATGCACTCTTCGTTC_4	2.04023816135859	0.182705798001535
CACCTGTTTTGGTCTCAGTCAGGA_4	2.05860813205507	-0.066637
GAAGGAAGCCTACTGATCGACATC_4	2.04473084490389	-0.0851405
TCAGGCTTACCTAAGGTCTGCTCT_4	2.15586778480119	-0.0490598
AAGCACTGACGATGACACGGTCTT_4	2.40846236021043	-0.0625039
ATGACGTCCGTTATGCACTGTGTC_4	0.999502108091818	0.260324536433672
TGGTAGCTAGGCTTCTCTCAGCTA_4	1.85221938533705	0.0411583893968099
GTTGTTCGGCCTTGTTCTCAGCTA_4	2.50931237272854	-0.0590532
CGACGTTAACCTAAGGTTGTCGGT_4	2.07386139269245	-0.0212829
CGTTGCAAAGGCTTCTCACTGACA_4	2.49100543184036	-0.0128432
GAATCCGAGCCATAACCTCTGGTT_4	2.43848861176526	-0.0697508
CAACACCTCCGACTATTGCGTAGA_4	1.87079284826048	0.115568925563289
CACTAGCTTCTAACGCAACCGAAG_4	2.55240901596034	-0.0327239
GATCGAGTCACAAGTCTCGTGGAT_4	2.14231858689583	0.0934638770130422
TAACCGGTCACAAGTCCCAGTGTT_4	2.32532538131357	-0.0822947
GTGAAGTGGTAGAGCAGTGTTCCT_4	1.64311969541833	0.0381705785908104
GAAGTTGGGAATCGTGCGTAGGTT_4	2.52818414874748	-0.0050153
ATGCACGACATTGCCTGCAATTCG_4	2.33294932260777	-0.0474848
ATGCACGAATTCGAGGGCCAGTAT_4	2.07667424535377	-0.0255192
ACGGAACAGCTGGATTTATCAGCG_4	1.72707597604189	0.178485047334784
AAGCACTGAAGGACACGTATTGGC_4	2.23506397721584	-0.0764039
CTTAGGACCAATCGACAACTGGTG_4	1.80250363559912	0.0169816671400776
GAAGTTGGCAGAATCGCTGCGTAT_4	2.39631964077509	-0.0218594
GACGATCTTTCAGGAGCGTGTACT_4	2.19925815376186	-0.026323
AACCGTTCTTGGTCTCTCTGCTCT_4	1.90467312451755	-0.0558187
CACTAGCTGCCTTGTTCGTGTACT_4	2.18273677636467	-0.10976
GCTATCCTTGTGCGTTTGGTCCTT_4	2.43556395933409	-0.0971325
GTAGGAGTATTCGAGGGCTTCTTG_4	2.11953752333978	-0.120177
GCACAACTGCTGGATTGTAGCATC_4	2.3745128967289	-0.0727273
ACTCTCGATCTCTAGGAGGATGGT_4	1.73057230544457	0.0567669605254538
CAGTCCAACATTGCCTTGCACCAA_4	2.55271833276387	-0.0397452
GTGCCATACATTCGGTGCAATTCG_4	2.50245346063807	-0.0960243
TAACCGGTAGTCTGTGCCTTCCTT_4	2.50249576204597	-0.0676117
ATCCGGTAGTCGGTAATGTGGTAC_4	2.50799785103888	-0.0382158
GATTACCGCGCTAGTATCCGAGTT_4	2.20446237662398	-0.00119528
TCAGGCTTAGAAGCGTCATGGAAC_4	2.46222279705319	0.0535332257216492
ATGCCTGTGAGATGTCCTTCACCA_4	2.17244285040158	0.0406625359499855
TCAGGCTTCTAGGTGAGTGTTCCT_4	2.2705012828167	-0.0174918
AACGTCTGCTCAGAGTTGCGTAGA_4	1.9960480295352	-0.0342924
GCGTCATTATCGGTGTTCACGTTC_4	2.17928370881984	-0.0173226
GACGATCTCTCATTGCACCATGTG_4	1.7464157931373	-0.090164
CACTAGCTCACAAGTCAGGCATAG_4	1.97984652624048	-0.0450001
GATTACCGTCCGTATGTGCACCAA_4	2.17805813152943	-0.0621484
CGTGTGTACTAGGCATACATAGGC_4	2.40104348524473	-0.0761698
ATCGATCGGTAGAGCACTTCACCA_4	2.36155264304128	-0.0632997
TATCGGTCAGAAGCGTGACAAGAG_4	2.1219551897829	-0.0933441
ATCCAGAGCGCTAGTAGCATACAG_4	2.5266538405371	-0.0775654
GATGTGTGTAGTTGCGCGAGTATG_4	1.85542327513116	-0.0350646
ACGTTCAGGCCATAACGCAATTCG_4	2.50537488609365	-0.0919513
TAACCGGTGAGATGTCGTATTGGC_4	2.4105604003555	0.0678602720746747
GACGATCTGTAGAGCACTAACTCG_4	1.95851637647133	0.0443227786335647
ACGACTTGCATTCGGTCTACAGTG_4	2.04428643464517	-0.14677
GAAGGAAGACGTGATGACCTTCTC_4	1.58701948698099	-0.0551396
GTTACGCAGATGCACTCCAGTGTT_4	2.3437886263938	-0.093621
AGAGTAGCCCGACTATTTGACAGG_4	1.71090134849968	0.044897215457161
TGGCATGTCATTGCCTGTGTTCCT_4	2.50551844182398	-0.016609
ATCCAGAGGTCGGTAATATCAGCG_4	2.58094368448359	-0.0156495
GCTATCCTTGATCGGAGCTTAGCT_4	2.27094451666332	-0.0897112
ACGACTTGTGGAGAGTACCGCATA_4	2.43311240936126	0.0218225064059791
GACGATCTTCGAACCAGTTCATGG_4	2.20700974158018	-0.0603074
GTCGAAGACTCAGAGTGCACGTAA_4	2.19004220128009	-0.0540159
AAGCACTGGACTTAGGGTTCATGG_4	2.20907633749962	0.0497316905224628
GTCGAAGACTCAGAGTACAGCAAC_4	2.0883189438528	-0.0518286
ACAGCTCAGAGGACTTCATAACGG_4	2.01680573292449	-0.0588383
AAGCACTGGACTATGCGATTGGAG_4	2.33328274724603	0.0302926418616005
CATACCACTGCAGGTATATCAGCG_4	1.81611386445707	-0.0317139
GTGCCATAGATAGCGATTGTCGGT_4	2.03827374963506	-0.051548
GCGTCATTTGGAGTTGCCAGTGTT_4	2.17315503357079	-0.131883
CTGTTGACTTCAGGAGACGTCGTA_4	2.28356949978772	-0.0516207
TACGCTACCTGACACAGCGTTCTA_4	2.19537997126563	-0.0100141
AGCGTGTTTGAGGTGTGTGTTCCT_4	2.40993776715214	0.103928470298518
GATGTGTGCGAGACTACAGCGATT_4	1.79241816610261	-0.0809949
CCTTGTAGCTAGGCATCAAGGTCT_4	2.32698182390392	-0.0414072
GAACATCGTAGTTGCGCTGCGTAT_4	1.94108588405364	-0.0618231
AGTTCGTCCTTACAGCAACTGGTG_4	2.36554527502364	-0.0586804
CGACGTTACGGATTGATCCGAGTT_4	2.08660662713431	0.0795400035897438
GCAAGATCTGATCGGAAACTGGTG_4	1.89295319067138	-0.0527733
CAATGTGGGATACTGGCGTAGGTT_4	2.33400575023289	-0.00253179
GATCGAGTGATGCACTTCACGTTC_4	2.23457956073812	0.0167772209384515
ATGACGTCCGAGACTAAGCAGATG_4	1.99948809871181	0.00767757603164851
AACGTCTGCAATCGACCATCTACG_4	2.63659424685159	-0.0162226
GTTGTTCGTGTGAAGCCGGAATAC_4	1.99563777040209	0.0102198250157398
CAATGTGGTGATCGGATTAGGTCG_4	1.95365685734496	-0.0748756
CGTTGCAACTTACAGCACCGCATA_4	1.88780571690713	-0.0463687
TTCGTTGGACATTGCGATGGAAGG_4	2.46106589721066	-0.0451714
CAGTCCAAAAGGACACAGCAGATG_4	0.939498332620222	0.152506313823403
TGTGACTGGATAGCGATCGTGGAT_4	1.7425781318083	-0.035612
ATGACGTCCCGACTATCTGGTTCT_4	1.81027547411523	-0.00286991
TATCGGTCTTCAGGAGTCACGTTC_4	2.36496882980362	0.000651443078924147
ACGACTTGTGCAGGTACCATACGT_4	2.45546030734238	-0.0732628
GAGCAGTACATTGCCTACAGCAAC_4	1.55463955758432	0.036630144226675
AACGTCTGGCCATAACCAGTCTTC_4	2.41552432550199	-0.105432
CAACACCTCAGAATCGTGGTCCTT_4	1.87358771208762	-0.0489844
GAACATCGTACGGTTGGCTGTTGT_4	2.32326517885419	-0.059311
TTCCAAGGTTACCGAGAGTCAGGA_4	2.22288	-0.0830252
ACGGAACAAGAAGCGTAACCGAAG_4	2.44811002473632	-0.0555716
GATAGGCTGACTATGCCCATACGT_4	2.18090757903592	-0.0567105
TGAGCTAGTGGAGAGTGTTCATGG_4	2.48425710186615	-0.0351407
CCTTGATCGCTGGATTCTACAGTG_4	2.48529392363647	0.0693109393663266
CCTGATTGTGCAGGTATTCAGCCT_4	2.13659062836742	-0.0243149
CTTCGACTCTCAGAGTAGTCAGGA_4	1.90335053900444	-0.0672523
TGTGACTGTTGGTGAGCGAACTGT_4	2.36478133540383	0.0571430082646012
ACGACTTGATGGTTGCTGCACCAA_4	2.19769266008506	-0.0849058
ACTCTCGATTGGTGAGCTGGTTCT_4	2.41298685707618	-0.0235237
ACCACGATCAGAATCGGTCTAGGT_4	2.48991989147947	0.00417117203055239
GATTGCTCACCAATGCTCACGTTC_4	1.92555180504461	0.0239515364597278
TGGACTCTAGTGCAGTGCTTAGCT_4	2.14278	0.0220025070562938
ACCACGATTCGAAGGTTACACGCT_4	2.40057521475445	0.00315982748814619
GATTACCGAAGGACACGTGTTCCT_4	2.14055580264112	-0.00780232
TATCGGTCACCAATGCCAGTCTTC_4	1.62923836155468	0.000388908283711353
GAACATCGTTGGTGAGACCGCATA_4	2.25189195872306	-0.0940474
ATGCACGATACCAGGATTCAGCCT_4	1.66563360913055	0.138501473992406
CGTGTGTAGCCATAACTAGCCGAA_4	2.14232067075299	-0.0328234
GTCGAAGAAAGGACACACAGCAAC_4	1.91824923160512	0.0924513160020122
CATACCACGAACGCTTACGGTCTT_4	2.05542426838128	0.0181490846967325
TACGCTACAGGTTCGAACAGCAAC_4	2.39647893761654	-0.109732
TCAGGCTTTGATCGGAAGCAGATG_4	1.9203012947859	-0.0248609
TAACCGGTTACCAGGACGTAGGTT_4	2.11460038285594	-0.0308586
AGAACGAGGTCGGTAAAGGCATAG_4	1.91003051398261	0.0802770652878616
CTTAGGACGACGAATGCATAACGG_4	2.53169872850753	-0.00939358
TTCCAAGGAATGCCTCGCTTAGCT_4	1.6876771066282	0.166225308869628
TACGCTACTACGGTTGATGGAAGG_4	2.39390048244864	-0.0188219
GCACAACTTGGAGAGTTGCACCAA_4	2.57878359526046	-0.0504251
[truncated: 1,168 more rows]

## Sheet: 2-L5D1
	Ribosome and fiborin genes	Hippo_signaling_pathway
ACTCTCGACAACCTAGGAGCTCAA_1	1.85351053275339	-0.0798446
TGGTACAGTCGAACCAGATTGGAG_2	2.04663569129243	0.0166780737775394
GTTGACCTTCGAAGGTTGTGGTAC_2	2.09168551863631	-0.0364569
TAACCGGTCATTCGGTGATTGGAG_2	2.36343864189181	-0.0427267
GAACATCGGCCATAACCATGGAAC_2	2.22602900443555	-0.057153
GAGACGATCATTCGGTCAGGTATC_2	2.22011492236676	-0.102204
CCTTGATCCTCTACTCTAGCCGAA_2	2.40325957220636	-0.0375217
TTGGACGTATTCGAGGAAGGCTGA_2	2.15193811550512	0.00647984907646264
TTGCGAAGTCCGTATGCAGGTATC_2	2.25003651060398	-0.0433321
TGGCATGTCTGACACAAAGGCTGA_2	2.50778093279641	-0.0404197
GCTATCCTCAACCTAGTCTGCTCT_2	2.02053657389802	-0.0337456
ATCACACGAGTCGACACATCTACG_2	2.15552781448332	0.162476988165312
ACGGAACATTGGTCTCCGAACTGT_2	2.24020152398629	-0.0532454
ACTAGGAGCAACCTAGTGGTCCTT_2	2.08345797746084	-0.00755491
TTCGTTGGTTGATCCGAGCAGATG_2	2.07499898023353	-0.0550592
CACTAGCTTTGGTGAGAACCTTGG_2	2.29145057786712	0.000470338725745839
AACCGTTCTGAGGTGTCATAACGG_2	2.24274388197954	-0.0914434
CATACCACTGTGAAGCGTTCATGG_2	2.2222344914493	-0.00888531
GAACATCGTAAGTGGCAACCGAAG_2	2.1131273309718	0.0315524195088339
TCAGGCTTTTCAGGAGTAGCCGAA_2	2.1264322204537	-0.0128553
TGAGCTAGTCCGTATGAACCGAAG_2	2.01685219005449	-0.038782
GATCGAGTTGATCGGAATGGAAGG_2	2.41553190694401	-0.0885642
GAAGGAAGCAGAATCGACGTCGTA_2	2.18157643213255	0.00784422545762979
GAACATCGGTCCTAAGCATAACGG_2	2.06602614972649	-0.0100338
AGTTCGTCCAGAATCGAGGTCACT_2	2.22286515105648	0.00540992438089712
GATAGGCTGTAGAGCAGCTTAGCT_2	2.20111890100639	0.0299121938287103
ACGTTCAGTAAGTGGCTCAGACGA_2	2.29207721215309	-0.000875717
GTAGGAGTCCAAGTTGCATAACGG_2	2.25109949496455	-0.00865183
GCACAACTTGGAGAGTCGTAGGTT_2	2.34109911992138	-0.0460733
CGTTGCAAACCAATGCTAGGATGC_2	2.31765036568048	-0.103059
CATACCACCGGATTGATCTCCGAT_2	2.40774241252309	0.0901862059965392
GCGTCATTTGCCATTCGCGTTCTA_2	2.3396434372646	-0.0296722
GCGTCATTCATTCGGTCAAGCAGT_2	2.33786642502065	-0.00573713
TTCCAAGGTGTGCGTTAACCTTGG_2	2.19604764095874	-0.0984519
GAGACGATAGTCTGTGGATCGTAC_2	2.4007090016496	-0.0496039
CGGTTGTTTTACCGAGAAGAGCCA_2	2.3889655187416	0.00794121497735135
ATCGCCATACTCGTTGTCGTGGAT_2	2.27233769397571	-0.0124636
ATGCCTGTCACAAGTCGCATACAG_2	2.25388672603905	-0.0565547
ACTGAGGTCATTGCCTCTTCACCA_2	1.99684184244005	-0.0681318
GATTACCGTACCAGGAACTGTGTC_2	2.24718447253948	-0.027691
GATAGGCTGTATGCTGAACCTTGG_2	2.26314219845351	-0.0414751
AACGTCTGCAACCTAGGATCGTAC_2	2.26565546412297	-0.0492445
ATCACACGTTGATCCGCGGAATAC_2	2.21566372593957	-0.0154835
ACGTTCAGTACGGTTGGCGTTCTA_2	2.36741518070066	0.0327044133054323
CTTGTCGAACCAGCTTCCAGTGTT_2	2.45166654526498	0.0952502300938411
TGGACTCTCTCATTGCTGCCTCTT_2	2.36179039105357	-0.0577239
CATACCACCTTACAGCGCTTAGCT_2	2.33954531262076	-0.098587
TTGCGAAGGACTTAGGACGTCGTA_2	2.27407243456549	-0.0642153
GCGTCATTCAACCTAGTTAGGTCG_2	2.27850361526922	-0.0579583
TTCCAAGGAATGCCTCGTTCATGG_2	2.3903250110648	-0.102381
CGCAATCTAGGAGGAATCTGCTCT_2	2.31751271958978	0.00323053307897619
CGCAATCTCGACCATTAGGCATAG_2	2.24314442289311	-0.056754
CTGTTGACGATACTGGCAAGTGCA_2	2.32694200718563	-0.0604896
GAGACGATCTGGAGTATCGAGTGA_2	2.35428467151928	0.0369594156439364
ACGTTCAGCTCATTGCAGCAGATG_2	2.10766532647204	0.0307063171404449
AGCGTGTTAGGCTTCTTCGACATC_2	2.28947148817585	0.101956324537779
TGGCATGTACCTAAGGTGCGTAGA_2	2.12160596373964	-0.0276901
CTTGTCGAACCAGCTTGTCTAGGT_2	2.25535436972792	-0.0494703
GTTACGCAATGGTTGCAGGATCTG_2	2.3053373482692	0.0266663690896365
GATAGGCTCAGTTCTGGTCTAGGT_2	2.35203118994201	-0.00258111
CACTAGCTCGATAGAGTCCGAGTT_2	2.27718979367717	0.00785291621335747
TTCCAAGGGTATGCTGTCGTGGAT_2	2.32020630503441	-0.10086
ATCCGGTAGAGATACGTTACGGCT_2	2.49697911467829	-0.0165179
CTTCGACTTAAGTGGCTGCGTAGA_2	2.29002686134882	0.0840877317992909
CCTTGTAGTCTCGCAAACATAGGC_2	2.36189210744792	-0.040035
CCTGATTGGTCAGTTGGTTCATGG_2	2.26386898644466	-0.0999465
GTTACGCAGTCAGTTGTCCGAGTT_2	2.08449086552551	-0.0108692
ACGACTTGTCTCGCAATTCAGCCT_2	2.30809191094588	-0.0213446
CACTAGCTAGAAGCGTAACGGTCA_2	2.3072157931987	-0.00306699
GTTGACCTCTGGAGTAGAGCTCAA_2	2.39094432762184	-0.0609626
GCAAGATCGTCTGATCAGGTCACT_2	2.08189244948035	0.0194937054110986
GCGTCATTACCTAAGGGTATTGGC_2	2.33370175107918	-0.0365666
GCACAACTTTACCGAGACTGCTAG_2	2.31413447197502	-0.029973
TTGCAGACGAGATACGAGGATGGT_2	2.22535762675962	-0.0611834
TATCGGTCGATGCACTGAGCTCAA_2	2.38938729724705	-0.0963838
ATGCCTGTGCCATAACATTCTGGC_2	2.17563888397627	0.0787101969410422
ACTAGGAGGATACTGGCGTAGGTT_2	2.31080212814531	-0.0522112
GTCATCGACATTCGGTATTCTGGC_2	2.18004905008799	0.0598354789242075
CGTGTGTAACGATGACGTTCATGG_2	2.20481094160882	-0.0260568
TGGCATGTACCTAAGGCATCTACG_2	2.42110490737322	-0.0109028
ATGCCTGTTGATCGGAGCTTCTTG_2	2.26536317985924	-0.0543695
AGCGTGTTCTTACAGCCAGTCTTC_2	2.29709279479871	-0.0507522
CCGTAAGACAACCTAGCAAGGTCT_2	2.14972570174189	0.0250556655413488
TTCGTTGGCGATAGAGCCAGTGTT_2	2.09255567636535	-0.0351441
TTCGTTGGGATACTGGCATAACGG_2	2.20889477662095	-0.0185801
GAATCCGATCCGTATGAACGGTCA_2	2.15973623688356	-0.0100142
CTTGTCGATAGTTGCGTTGTCGGT_2	2.21808143144877	0.0122599144258103
GCACAACTCGCTAGTAAGGATCTG_2	2.19743252246993	-0.0541544
CAGTCCAATGCAGGTAAGGATGGT_2	2.20375162106755	-0.00788256
CTGTTGACAGCTCCTAACGGTCTT_2	2.42961243764089	-0.100602
TGAAGACGACGTGATGGCCAGTAT_2	2.25294965622573	-0.0569096
CGGCTAATGCCTTGTTCTAACTCG_2	2.09724647583768	-0.0305214
TATCGGTCAATGGACGCAAGGTCT_2	2.20079926351364	0.0649484116661396
ACGTTCAGCGTTATGCCATCTACG_2	2.20422212788468	-0.0134661
AACCGTTCGAGATACGTGCCTCTT_2	2.39730350651582	-0.0130835
TGGTAGCTGACGAATGAGGATGGT_2	2.29569108129686	-0.0120943
ATCCAGAGGCTCTGTAGTGTTCCT_2	2.38410602056889	-0.0215068
GTCATCGAGCCTTGTTCGTGTACT_2	2.31867140571804	0.0454095438295169
TAACCGGTTGGAGAGTTCTCCGAT_2	2.34515064823113	0.0435817633303112
CACCTGTTTTCAGGAGAACTGGTG_2	2.16669538466542	-0.0358287
ATCACACGGAGATGTCAGGTCACT_2	2.46257494557651	-0.00968302
ACGTTCAGCTGACACATAGGATGC_2	2.36851196303226	-0.104177
ATCACACGTAGTTGCGAACTGGTG_2	1.92845544529199	-0.0672643
CGCAATCTCAACCTAGGATTGGAG_2	2.31719350472012	-0.0531808
GAATCCGATGTGCGTTAGGATGGT_2	2.30957508769674	-0.015836
ATCACACGAATGCCTCTCTCCGAT_2	2.42203620476778	0.0640158121549253
CGCAATCTTCTCGCAAGCTTCTTG_2	2.37503323046692	-0.00522597
CACTAGCTCGAGACTACGAACTGT_2	2.21770592466184	-0.0889809
TGAAGACGCGAGACTAAGTCAGGA_2	2.25844334407419	0.0092042567034876
GAACATCGAATGGACGTTCTCTCG_2	2.19518990305281	-0.0284184
TTGCAGACTGTGAAGCTGCCTCTT_2	2.32323140562583	-0.0643401
TGGTAGCTCACAAGTCCGATGCTT_2	2.21607583366969	-0.0453737
CAGTCCAACGTTATGCGTCTAGGT_2	1.70349008940993	-0.0274416
ATCGCCATGAATCGTGACAGCAAC_2	2.34609211859782	-0.0655098
TTCCAAGGTGTGCGTTCACCACTA_2	1.73603865000316	0.0226954946089973
GAACATCGAGTGCAGTTTAGGTCG_2	2.1882234048393	-0.0840353
TGAAGACGACCAGCTTACTGCTAG_2	2.3626330138968	0.0268524749618507
ACGTTCAGCGTTATGCCAAGCAGT_2	2.47182890521294	-0.0381537
ATCGCCATACTCGTTGACTGCTAG_2	2.24766973790105	-0.0364698
GTAGGAGTACTCGTTGGCACGTAA_2	2.30417052515662	-0.0596868
CTTAGGACGTATGCTGCAGTCTTC_2	2.27491389318674	-0.0557
TGGCATGTTTGATCCGACATAGGC_2	2.42978389507321	-0.019494
GAACATCGTGGAGTTGTCAGACGA_2	2.34558709522253	0.0253701277730521
TGCTTCCAAGGCTTCTCATGGAAC_2	2.32264118011705	0.0323986325177817
CGCATGATGACTATGCTAGGATGC_2	2.33342987923353	-0.0263473
CATACCACGAGATACGAGGATGGT_2	2.28954527730529	0.0350493634420921
TAACCGGTGCCATAACCAAGCAGT_2	1.86119124423455	-0.0617507
TGGTAGCTTTGGTGAGCTACAGTG_2	2.36927762894129	-0.0614162
CAGTCCAACTCATTGCACAGCAAC_2	2.46843126046204	-0.0110063
GATAGGCTCAGAATCGAGGCATAG_2	2.33493843747357	-0.0276313
TGGTAGCTAGTGCAGTTAGGATGC_2	2.38235235172796	-0.0798755
TTCGTTGGGAATCGTGGCGTTCTA_2	2.22306434338464	-0.0610431
GTTGTTCGGAAGAGGTACCTTCTC_2	2.27594127150096	-0.0529617
ATCCAGAGACGATGACAGTCAGGA_2	2.20215866484337	-0.0346301
ATCCAGAGGAGATGTCCTGCGTAT_2	2.35363391802636	0.0528100679794774
TGTGACTGTGATCGGACTTCACCA_2	2.37394959715247	-0.0754379
ACTAGGAGCTCTACTCGCTTCGAA_2	2.20093802914765	0.0048102451238405
CGGCTAATTGAGGTGTATGGAAGG_2	2.38283012707825	0.00714248125207681
ATGACGTCTGTGAAGCTTGACAGG_2	2.16385372393342	0.0445182933064469
GCACAACTTCGAAGGTCGATGCTT_2	2.45063927791174	-0.0086689
CGCAATCTACGTGATGAAGAGCCA_2	2.38580757419267	-0.0336563
GATCGAGTTTGGTCTCAGGCATAG_2	2.19724122463019	-0.0627791
ATCGCCATGCCTTGTTACTGTGTC_2	2.35487415662468	-0.0668343
TAACCGGTCTTGCTGTACGGTCTT_2	2.36038611636713	-0.0554062
CCTTGTAGGACTTAGGATGGAAGG_2	2.38361546075624	-0.0443836
CTTCGACTTCCGTATGACTGCTAG_2	2.25972010555519	-0.043998
CATACCACAGTGCAGTACTGTGTC_2	2.29269212230959	0.123360514653438
TAACCGGTTAAGTGGCGCATACAG_2	2.20663332888194	0.0319218181043322
ACAGCTCAAGCTCCTAACATAGGC_2	2.35129325488533	-0.0577211
CGCATGATGATACTGGTCGACATC_2	2.27015451394039	-0.0171389
ATCACACGCAGAATCGTCGTGGAT_2	2.55525953233483	0.00894417853555592
ATCACACGAGGAGGAATCACGTTC_2	2.06460304325695	-0.00140929
GTTGTTCGCGAGACTAGCAATTCG_2	2.37297350639443	-0.0336104
ACGTTCAGATCGGTGTAACCTCCT_2	2.37061839477631	-0.0249132
ATCCGGTACTGACACAGTATTGGC_2	1.84961349402566	-0.062719
ATCCGGTAGTCTGATCCGAACTGT_2	2.41697365168702	-0.0186316
TACGCCTTCACAAGTCACTGCTAG_2	2.3028829959726	-0.0318179
TCGCTGTTCGGATTGATCGTGGAT_2	2.38219575477285	-0.00778939
ACGTTCAGACCAATGCATTCTGGC_2	2.29325444432038	-0.0649817
CCTTGTAGCTCATTGCCAAGGTCT_2	2.39900514909183	-0.00857177
ACTAGGAGGAGATACGACCATGTG_2	2.49399723258046	-0.0572756
ACTGAGGTGCCATAACTCGTAGTC_2	2.27258501095068	0.00437731587525589
GTTGTTCGGTCGGTAACCATACGT_2	2.43736568683843	-0.0730424
AGAACGAGGCTGGATTGCATACAG_2	2.34413647276821	-0.0377535
TGCTTCCACCGACTATGATCGTAC_2	2.41299704579092	-0.0180587
TATCGGTCAAGGACACGCTTCTTG_2	2.36291218833178	-0.00572955
GAAGGAAGCGGATTGATAGCCGAA_2	2.30535962088001	-0.0287934
GTTCTCGTGACTATGCGCTTCTTG_2	1.81108129307589	-0.00661729
ACGTTCAGGTCGGTAAACTGCTAG_2	2.34717641915012	-0.0269825
AACCGTTCAGTGCAGTCGATGCTT_2	2.38112201952427	-0.00226533
CCGTAAGAAATGGACGTACACGCT_2	2.28579216799064	-0.0556815
AGAACGAGCTAGGTGATCAGACGA_2	2.31222842457537	0.0550070833504619
GAGACGATGAATCGTGCGTGTACT_2	2.31419908660962	-0.0106347
ATCACACGAGGCTTCTGCAATTCG_2	2.4074746547378	-0.0412611
TAACCGGTTAGTTGCGCAAGGTCT_2	2.23953365949885	-0.0377898
AGAGTAGCCGAGACTATTAGGTCG_2	2.45618187073974	0.00180241426052977
ACGTTCAGTGTGAAGCTAGGATGC_2	2.4308238478322	-0.0203038
GTAGGAGTGATACTGGTGCACCAA_2	2.43367670777353	-0.025443
TTGCGAAGATCGGTGTCAAGTGCA_2	2.39066994718691	-0.0333605
TTGGACGTGCTGGATTTTAGGTCG_2	2.42318797807223	-0.0400307
GAGCAGTAACCAATGCTATCAGCG_2	2.29017150986244	-0.00127138
CTTGTCGACGAGACTAGCGTTCTA_2	2.39736776522683	-0.0311639
ATGCCTGTTAGTTGCGGCCAGTAT_2	2.30317855632536	0.00689078772585958
CAGTCCAATGAGGTGTGCTTCGAA_2	2.45870024015956	-0.0953544
CCGTAAGAAAGGACACGTATTGGC_2	2.33866531304895	-0.00134274
AACCGTTCCTCTACTCAACCTCCT_2	2.28200400912649	-0.0138198
CACCTGTTGCCATAACCACTGACA_2	2.32300809112217	-0.0528447
CGTTGCAAGAAGAGGTCGTGTACT_2	2.32600252875109	-0.0133612
TTCGTTGGTCGAAGGTTACACGCT_2	2.42742022914766	-0.0934457
AACGTCTGCATTCGGTAACTGGTG_2	2.27484396507852	-0.0717268
CAATGTGGAGGAGGAACACCACTA_2	1.90841463709568	-0.0186714
TCAGGCTTGAACGCTTGCATACAG_2	1.94231978308136	-0.0227856
GAGACGATAGCTCCTAGTCTAGGT_2	2.17896018023478	-0.00649502
GAACATCGCTGACACAAGGATGGT_2	2.17323037852629	0.0324898453055384
CTTCGACTCGCTAGTACTCAGCTA_2	2.40239052644131	-0.0126968
GTGCCATAATCGGTGTGTATTGGC_2	2.0508475555736	0.0230509718648663
TGGACTCTTCCGTATGCTCAGCTA_2	2.09493259085625	0.00697255862128712
TGGCATGTGACTATGCTCACGTTC_2	2.34295014062669	-0.108861
AGCACTTCCTCTACTCGTAGCATC_2	1.95551219220199	0.00638772568934233
GCTATCCTTCGAAGGTGCATACAG_2	2.18844207296697	0.0237640593919867
GCAAGATCTTCAGGAGTTCTCTCG_2	1.82476069616944	-0.0381173
ATCGCCATGAGATGTCCAGGTATC_2	2.25732025104834	-0.0111868
ACTAGGAGCTTGCTGTACCGCATA_2	2.05349618118962	-0.00236747
CACCTGTTTAGTTGCGTAGGATGC_2	2.43217108833864	-0.0276994
CTTCGACTCAATCGACACTGTGTC_2	1.6651647827733	-0.0639273
TGGACTCTCGAGACTATCGTAGTC_2	2.00007082069651	-0.0584927
TAACCGGTGACGAATGCATGGAAC_2	2.04825599098248	-0.0517119
TGAAGACGATGGTTGCTCTGAGAG_2	2.08686635897263	-0.00706814
ATCGCCATTACCAGGATGTGGTAC_2	2.03969096605746	-0.0665625
TGGCATGTAGAAGCGTTCAGACGA_2	2.45468810060045	-0.040925
CCGTAAGATACATCGGGTAGCATC_2	2.27012869736434	-0.0453405
ATCACACGCTCAGAGTCATGGAAC_2	2.32486311995332	0.0418038942674767
TGGACTCTAGGTTCGAGTGTTCCT_2	2.27466701431118	-0.0559204
GCGTCATTGACGAATGTGTCCAGA_2	2.33337214216465	0.0280832043725513
ACGGAACAATTCGAGGGCCAGTAT_2	2.09982327079815	-0.0904885
GCAAGATCTGGAGAGTCTCAGCTA_2	2.2313363535238	-0.0234888
AGCACTTCGAATCGTGTGGTCCTT_2	2.32629170879931	-0.0852474
ACGACTTGTACGGTTGTGGTCCTT_2	2.29760515219918	-0.0436626
GCTATCCTACCAGCTTCAAGTGCA_2	2.08642813169357	0.0139538865086094
ATCCGGTATGAGGTGTCAAGCAGT_2	2.15412064663381	-0.00719903
TGTGACTGGAAGAGGTTTAGGTCG_2	2.16150422463633	-0.0133262
TACGCCTTTCTCGCAAAGGCATAG_2	1.87996925374041	-0.0172144
GCGTCATTGAAGAGGTCATGGAAC_2	2.20709033328313	0.0396263468510325
GTCGAAGAGATGCACTCGAACTGT_2	2.0312074790598	-0.0505277
TTGGACGTATTCGAGGTTACGGCT_2	2.16560115668036	-0.0351322
GATTACCGACTCGTTGTGCACCAA_2	2.11733057729089	-0.0768102
CACTAGCTTGGAGTTGAGGCATAG_2	2.47416670369287	-0.0674205
CACCTGTTTGGAGAGTACTGTGTC_2	2.19644444175843	-0.0358172
TTCCAAGGCTCATTGCAGGCATAG_2	2.13903687698433	-0.0396854
GCGTCATTCTAGGTGACCATACGT_2	2.49674815577965	0.00544532375658598
GAAGGAAGCACAAGTCTGCCTCTT_2	2.19310243017453	-0.0129633
CCTTGATCTGGAGTTGTGTCCAGA_2	1.99973212701949	0.0115338244480844
TGGCATGTACCTAAGGCTCTGGTT_2	2.47082337289611	0.0149494423899788
GTTGACCTTGAGGTGTACTGCTAG_2	2.40195173006562	-0.00489917
GCACAACTACTCGTTGTCGTAGTC_2	2.23124597270524	-0.0213135
TTGCGAAGAGGCTTCTCAGTCTTC_2	1.96172337263924	0.0186208835115733
ATCCGGTACAATCGACAGTCAGGA_2	2.23707354628338	-0.0819375
CTTGTCGATGTGCGTTAGCAGATG_2	2.38484468117099	-0.00861107
TGTGACTGACCTAAGGATGGAAGG_2	2.02327387369306	0.00933977467151867
AACCGTTCTCGAAGGTACAGCAAC_2	2.38595376630607	-0.0260323
CACTAGCTGAATCGTGTGGTCCTT_2	2.15015963297503	-0.0275972
TTCGTTGGGTCAGTTGTTAGGTCG_2	2.31749369777273	-0.0217073
ATGCCTGTCTCTACTCCCTTCCTT_2	2.26306283873874	0.000302938897702137
GCGTCATTACCTAAGGCAAGGTCT_2	2.21041381788381	-0.00920212
TGGTAGCTACGATGACTCGTGGAT_2	2.14062303151186	-0.0295814
AGCGTGTTCTAGGCATCATAACGG_2	2.18506938468797	0.0254631271142009
ACGACTTGAGTGCAGTTTAGGTCG_2	2.29096493745651	-0.0298992
GTCATCGAGATGCACTTAGCCGAA_2	2.13661214959917	-0.0477465
ACTAGGAGAGTGCAGTAACCTTGG_2	2.21474190383242	-0.00425755
GAAGTTGGCTCTACTCTAGCCGAA_2	1.87221198981539	-0.0310715
GATCGAGTTACATCGGGTGTTCCT_2	1.82767268193824	-0.00508875
GAAGTTGGCTCATTGCGCATACAG_2	2.05337647998835	-0.0265338
TGGTAGCTACATTGCGGCTTCGAA_2	2.42102004779052	-0.0346295
TAACCGGTAGTCTGTGCTCAGCTA_2	2.06379259997864	-0.0127718
ATATGCGCTCTCGCAAGTTCATGG_2	2.28138661933325	0.0618401056134302
ATCGCCATACATTGCGTTGACAGG_2	2.06495969857599	-0.0500344
CGGTTGTTGTCAGTTGCTTCACCA_2	2.32329070927747	-0.0296684
GAATCCGAGTCCTAAGTAGGATGC_2	2.00538040175688	0.00578773825056855
CCGTAAGAACTCGTTGGCACGTAA_2	2.21276908689825	-0.0326615
ACGTTCAGGTCGGTAAGCTTAGCT_2	1.68205174153436	-0.0253714
CACCTGTTGACTATGCTCCGAGTT_2	2.34105921029933	0.00789195263928345
TGAAGACGTACATCGGAGTCAGGA_2	2.29270267658218	-0.0572734
AAGCACTGACGTGATGGCACGTAA_2	1.68115779261795	0.0123938085557245
TCGCTGTTTCCGTATGAGGTCACT_2	2.07874271348132	-0.079088
CATGGCTAGAATCGTGTTGACAGG_2	1.98000416496769	0.00784113372918774
CGCTCTATAGGTTCGACCATACGT_2	1.75604156726278	-0.019632
CCTTGTAGCTGACACAGTGTTCCT_2	2.31150766996859	-0.0171146
CGGCTAATGCCATAACACCTTCTC_2	2.03537296006161	0.0527978339406632
AGAGTAGCTTGGTCTCCATAACGG_2	1.81499105838476	-0.0706266
ACCACGATGTAGAGCATCTGCTCT_2	2.36080364472617	-0.0332471
CGTGTGTAGATACTGGGTATTGGC_2	2.06315853794722	-0.0630929
CTGTTGACGAGATGTCTCAGACGA_2	1.98446643524176	0.0397583570469849
GTTGACCTAGAAGCGTGTAGCATC_2	2.05172393112917	0.00211953908537629
TGGACTCTATTCGAGGTCTGCTCT_2	2.11820379871018	-0.0480755
TGGCATGTGTCTGATCTATCAGCG_2	2.40204756923455	-0.0203335
GTTACGCACTTACAGCTTCAGCCT_2	2.1069381025428	0.0209435861354354
CATGGCTACTAGGTGAACCGCATA_2	2.18266	-0.0236339
GAACATCGTTGGTCTCCCTTCCTT_2	2.31021750917716	0.00792751341116898
GCACAACTGTCTCCTTGCGTTCTA_2	2.3389756789838	0.0631417861950467
GTTCTCGTAGGTTCGAGATTGGAG_2	2.15367914296544	0.00830271078770937
GTTACGCATGGAGAGTAGCAGATG_2	1.88047924940823	-0.0421118
TAACCGGTCGTACGAAGCACGTAA_2	2.23952836182037	-0.016634
GATAGGCTGAATCGTGCATCTACG_2	2.12061995035868	-0.0574921
GAGCAGTATAAGTGGCTCGTGGAT_2	2.47423049357376	0.0378180987947884
AACGTCTGCAGAATCGCAGTCTTC_2	1.8978374596008	-0.0387673
TTGCGAAGTACATCGGCATAACGG_2	1.95002694607185	-0.0263487
ACTAGGAGGATACTGGTCGTGGAT_2	2.35163112200239	-0.0190032
TTCCAAGGGACGAATGCTACAGTG_2	2.14120053227811	-0.0413927
TGGCATGTCGCTAGTATCTGCTCT_2	2.34807899485667	0.0141175283673784
CACCTGTTCGTCAATGTCTCCGAT_2	2.15457036798072	-0.0540692
CACCTGTTTGTGCGTTGATTGGAG_2	2.23702021601556	-0.079861
AGCACTTCCGTACGAAACATAGGC_2	2.26827139537398	-0.0595492
GCACAACTTGGAGTTGCTGCGTAT_2	2.0878818519578	-0.0564978
GCGTCATTCGACCATTTGGTCCTT_2	2.40049922064157	-0.016393
GAATCCGAAGAAGCGTTAGCCGAA_2	2.15140567403786	0.0889649451611033
AACGTCTGTACATCGGGTAGCATC_2	2.10747922564401	-0.0197303
CTGATCGTATCGGTGTCCTTCCTT_2	2.36758973787697	-0.0389598
TGTGACTGATTCGAGGCACTGACA_2	2.41848311164516	-0.029462
TCGCTGTTTGGAGAGTACTGCTAG_2	2.23847455221109	-0.0357426
GTTCTCGTGCCATAACATGGAAGG_2	2.34872715859143	-0.0821252
GTTACGCACAACCTAGAACTGGTG_2	2.41009226424077	-0.0691868
TTGCAGACTGATCGGACTTCACCA_2	2.17466282802094	-0.036174
AACGTCTGTGCAGGTATCAGACGA_2	2.36824689984443	-0.0466783
ACGACTTGTCTCGCAAGTATTGGC_2	2.37086	-0.0462043
AGTGGATCAGGAGGAACACTGACA_2	1.95422273017529	0.0174782262427127
GATTACCGCATTGCCTGATCGTAC_2	2.20873406253463	0.0112464640584413
CGTGTGTACAGAATCGCTTCACCA_2	2.08300107248104	-0.009951
AACGTCTGAATGCCTCTCTGAGAG_2	2.06022303661882	-0.0388114
GATTACCGGCCTTGTTACCGCATA_2	2.25008103490537	-0.0067976
CCTTGATCCAGTTCTGTAGGATGC_2	1.95986862800711	0.0124879865858019
CAATGTGGGCCTTGTTGATTGGAG_2	1.94476992985661	0.0195928232304274
CATGGCTAGTAGAGCACCTTCCTT_2	2.0409905117847	-0.00370052
TTGCAGACCGCTAGTATACACGCT_2	2.48724924963499	0.00419689953074356
TTCCAAGGCCTACTGATTAGGTCG_2	2.37793173373642	-0.0285018
GTTGTTCGTGCCATTCACAGCAAC_2	1.86169731918966	0.00119921690412943
ACGACTTGGTAGAGCATTCAGCCT_2	2.33723325872166	-0.00769986
CGCAATCTTGCCATTCTTCAGCCT_2	2.3387052396121	-0.0152341
ACGACTTGCAGAATCGGATCGTAC_2	1.98816455156519	-0.0414075
AAGCACTGGAGATGTCCCATACGT_2	2.15742749806389	-0.0386969
GTTGTTCGCAATCGACCGAGTATG_2	2.06586181130374	-0.0724207
ACGACTTGGTAGAGCACTACAGTG_2	2.38873920454634	-0.0124679
TTGCGAAGCTGGAGTATTCAGCCT_2	2.44124294024659	0.0182719458704289
ATATGCGCGCTGGATTTTGACAGG_2	2.34293421455759	0.0221795290514617
GAAGGAAGTACCAGGATAGGATGC_2	2.40341101128949	-0.021834
ACTCCATCCTAGGTGAAGGTCACT_2	2.01344431982587	0.0117060392918066
ACCACGATTCTCGCAAAACCTCCT_2	2.14282280048285	-0.0577703
CGCAATCTGACTTAGGACCGCATA_2	2.14191793703951	-0.062088
GTCGAAGAGAGATGTCTCTGAGAG_2	2.02614770913404	-0.0224226
CTTAGGACTACATCGGCGATGCTT_2	2.11817167002392	-0.0260869
GCAAGATCCTTACAGCACCGCATA_2	2.3616784708023	0.0264924971876386
CAGTCCAACAGAATCGGTAGCATC_2	2.20065861525151	-0.0371181
CTGATCGTGAGATACGCTTCGTTC_2	2.51820930040562	-0.0422444
CGACGTTACGAGACTAGCAATTCG_2	2.47046821327144	-0.0720663
TTGGACGTGTCTGATCGATCGTAC_2	2.34014138766726	-0.0166129
GATTACCGTGATCGGACTAACTCG_2	2.39576312332338	-0.0530841
CGGCTAATGATACTGGCTGCGTAT_2	2.02063968733527	0.00413270699135695
TTCCAAGGAATGCCTCCACTGACA_2	1.96692462039009	-0.0140853
TAACCGGTCAATCGACTCGTGGAT_2	2.1700397141255	0.0198775321149759
GTCGAAGATGGAGAGTATGGAAGG_2	2.06733596234933	-0.0382285
GTTACGCATGCAGGTACAGCGATT_2	2.38060331540088	0.00228035637050839
GTTGTTCGAGGTTCGATGTCCAGA_2	1.82807850681657	-0.0179489
AGAACGAGTGGAGAGTCAGGTATC_2	1.97765571335622	0.0613581040211575
CGTTGCAATTGGTCTCCTCTGGTT_2	2.32537864466434	0.00159266477937743
TTCCAAGGTCGAACCACGGAATAC_2	2.07005808550727	-0.0272839
TTGCGAAGCAATCGACACCATGTG_2	2.47942839204927	-0.0195824
CTTGTCGAAAGGACACTCGAGTGA_2	1.9624995558903	-0.0482902
GTTCTCGTGTCGGTAAACCATGTG_2	2.41927489913628	-0.0357697
TTGCAGACAGGAGGAACTCTGGTT_2	1.85425565839574	-0.0200504
TGAAGACGCTAGGCATGCTTAGCT_2	2.23247457639666	0.0163181496747722
GAATCCGACTTGCTGTAGGATGGT_2	1.69391193432337	-0.0209283
TTGGACGTCTAGGTGAGTAGCATC_2	2.33750866561859	-0.0184175
CGCATGATGTATGCTGTGTGGTAC_2	2.27911485497791	0.00987858779429371
GAACATCGATTCGAGGTCAGACGA_2	2.01100766027741	0.0107820024880358
ACCACGATTCGAACCATGTGGTAC_2	2.12724723826696	-0.0114461
ATCGCCATCGTACGAACGAACTGT_2	2.17452446381925	-0.0267207
TTCGTTGGGAGATGTCTGGTCCTT_2	2.40897225424372	-0.0297535
TACGCCTTGTATGCTGTCACGTTC_2	1.93134665705427	-0.0617762
CCGTAAGATGTGAAGCAGCAGATG_2	2.16157668764157	0.00963993679659522
AGAGTAGCGAGATACGTCTGAGAG_2	1.6432878137762	-0.053785
GTCGAAGATACCAGGACTTCGTTC_2	2.17970916046062	-0.0083119
GTTGTTCGTTACCGAGCTCAGCTA_2	2.03906067635305	0.0144467546252488
TGAAGACGAATGGACGCTTCGTTC_2	2.06279745908298	-0.0236304
GTTGTTCGTCGAAGGTGACAAGAG_2	2.13998688706877	-0.00783276
AGCGTGTTTCGAAGGTGCAATTCG_2	2.17844174187703	-0.0409699
CAACACCTTTCAGGAGCAGTCTTC_2	2.28592681419306	-0.0850367
ACCACGATCTCTACTCTCTCCGAT_2	1.83485855788849	-0.0297557
GTTACGCAAGTGCAGTGCGTTCTA_2	2.13254015241503	-0.0226576
CGCAATCTGTCCTAAGAACCGAAG_2	2.25975928888102	-0.0232846
TAACCGGTTAAGTGGCACTGTGTC_2	2.32833213760959	0.0101904967000475
TGGCATGTGCCTTGTTCGAACTGT_2	2.41493664873522	-0.074949
ATATGCGCGCCATAACGTTCATGG_2	1.96982313787763	0.0225131893871523
GTAGGAGTGTCCTAAGGATTGGAG_2	2.15430271376383	-0.0589027
AGTGGATCCTAGGTGAAACTGGTG_2	2.20827547552738	-0.0300025
CAACACCTTGATCGGAATTCTGGC_2	2.16364207321828	-0.0331669
CGGCTAATCGTCAATGGTATTGGC_2	2.20332797187837	-0.0467353
TGGACTCTCGCTAGTACATCTACG_2	1.98024547757434	-0.0348284
AGCGTGTTCTGACACATAGCCGAA_2	2.05907760062836	-0.0297342
CAACACCTACGATGACTCACGTTC_2	2.24996968935978	-0.0523195
ATCCGGTATGCCATTCGCACGTAA_2	2.2004963085497	-0.0587335
AGCGTGTTCGATAGAGCGAACTGT_2	2.0740808030974	0.002867062538896
GAAGGAAGTACGGTTGCCTTCCTT_2	2.16716465388754	0.00439869305959487
ATCACACGGTAGAGCATGCCTCTT_2	1.98495623601303	-0.0289011
TTGGACGTAGTCTGTGCAGGTATC_2	1.87873253579097	0.0163071106647496
GATTACCGCTGACACAATTCTGGC_2	2.15268334097013	0.00424720850528489
GTGCCATATGCAGGTAGTCTAGGT_2	2.17673525654236	-0.0379549
CGGTTGTTTCGAAGGTGAGCTCAA_2	2.18317933629685	-0.0725873
CACCTGTTGACTTAGGCACCACTA_2	2.02151273950851	0.016581056412967
AGTTCGTCCGGATTGACTAACTCG_2	2.34191922829961	0.0139081873010963
CGTTGCAACCGACTATCTGGTTCT_2	2.06534308194086	-0.00163344
GAACATCGAGGCTTCTTCAGACGA_2	2.21950320593915	-0.0598928
GACGATCTGTCGGTAACGGAATAC_2	2.41700528691335	0.00828923686326116
CCTTGATCTCCGTATGTCGTGGAT_2	1.77562393486354	0.0640807568692279
CGACGTTACACAAGTCTAGGATGC_2	2.43533852722181	-0.0143786
ATCCGGTAGTCCTAAGGCTTAGCT_2	2.37807861657934	0.00116159577215519
GATTGCTCGATACTGGTGCGTAGA_2	2.30262168998174	0.0394806359160204
GAACATCGCGACCATTAGCAGATG_2	2.22695978527533	-0.0442693
GTCATCGAAATGCCTCAACCTTGG_2	2.38481199805224	-0.0158899
TGGCATGTGTCCTAAGCCTTCCTT_2	2.40064293014316	-0.036122
TTGCAGACTCTCTAGGTTAGGTCG_2	1.94516266506064	-0.0171461
GAACATCGGTCGGTAATCCGAGTT_2	2.43411958132236	-0.0518067
CAGTCCAAGTCCTAAGGCAATTCG_2	2.07317357753913	-0.0274532
AAGCACTGCCTACTGAAGGCATAG_2	1.76413707036889	-0.0440657
AGCGTGTTAATGGACGCAGGTATC_2	2.37182085055863	-0.0217265
CCGTAAGAATGGTTGCGCTTAGCT_2	2.35170862517432	-0.0207185
GTCGAAGACTAGGTGATAGGATGC_2	2.39811058609019	0.0148193492909659
TTCCAAGGCAACCTAGCATGGAAC_2	2.36276769560854	-0.0329666
GTCATCGAACCAGCTTTCACGTTC_2	2.10112425093474	-0.0279004
CGTGTGTAACTCGTTGGTATTGGC_2	2.2677493838126	-0.0052776
GTGAAGTGCCTACTGACTCAGCTA_2	1.98737102773199	-0.0169468
CCTTGATCACGTGATGTATCAGCG_2	1.90563858560694	-0.0324905
GAACATCGGATACTGGCTGCGTAT_2	2.04967105450676	-0.0267219
AGCGTGTTTCTCTAGGCAAGGTCT_2	2.18172445587699	-0.0272141
GATAGGCTATGGTTGCAACTGGTG_2	2.41273381903396	-0.0528704
AACTGAGCCTAGGCATACCTTCTC_2	1.77254688978345	0.0139527941273813
TCAGGCTTCGCTAGTACGGAATAC_2	2.32987332339291	0.0519273919997914
AGCACTTCAGCTCCTAGTTCATGG_2	2.07645830333929	-0.014131
CAGTCCAATTGGTCTCACCATGTG_2	2.42975296247195	-0.0398903
TCAGGCTTACGTGATGGCCAGTAT_2	2.33731209541118	-0.024638
TTCGTTGGACATTGCGTTGTCGGT_2	2.02484848809257	-0.0370934
GTTGACCTACCAATGCCGTAGGTT_2	1.89669373637067	-0.0364373
AGTGGATCTACCAGGAGCGTTCTA_2	2.08399242135023	-0.032484
GTCATCGATGCAGGTATGGTCCTT_2	2.13959132487074	-0.0504309
GAAGGAAGTGCCATTCTTACGGCT_2	2.06975571863776	-0.00778901
CGGCTAATCAGAATCGATTCTGGC_2	1.85628059211697	-0.016183
ATCGCCATCGCTAGTATTGTCGGT_2	1.88580604359754	-0.072204
CGCTCTATAGTGCAGTTGCGTAGA_2	1.99678512213829	0.0221051604435596
CGGTTGTTGTAGAGCATCGTAGTC_2	1.8415611315415	-0.0371727
CGACGTTACAATCGACCCTTCCTT_2	1.92233024480235	-0.030362
TGAGCTAGGTCAGTTGAGGATGGT_2	2.13199714607293	-0.0637239
CTTCGACTTCGAAGGTGACAAGAG_2	2.40949957809451	-0.0266438
ACTAGGAGGTAGAGCAAGGATCTG_2	2.38455288515537	-0.0568144
GCACAACTATTCGAGGTTCTCTCG_2	2.35290398568103	-0.0607672
TGAAGACGCTGACACAGCTTAGCT_2	2.02657484973272	-0.0321885
ACCACGATACATTGCGTGCACCAA_2	1.74689616949058	0.00254528448581869
CGCATGATCACAAGTCCACTGACA_2	2.10612621305089	0.0347363203716628
TGGCATGTTTGGTGAGGCTGTTGT_2	2.44405026685582	-0.0319212
AAGCACTGCGAGACTAAGTCAGGA_2	2.26961271342392	-0.056332
TAACCGGTCACAAGTCGCCAGTAT_2	2.32375735701878	-0.054913
ACGACTTGCGCTAGTACGTGTACT_2	2.04163826091565	-0.0535855
TGGTAGCTCAATCGACACCTTCTC_2	1.99771680980253	-0.0308702
GAAGGAAGGCTGGATTACTGTGTC_2	2.17293562311085	0.0736584211273213
CTGTTGACCGTCAATGTTCAGCCT_2	1.99283366865923	0.00632143880606675
TACGCTACTCGAACCATGCCTCTT_2	1.90759938895328	0.00501652616407249
GTCGAAGAAGGAGGAACTCTGGTT_2	2.3140598881418	-0.0181114
CACCTGTTTACCAGGACCATACGT_2	1.99900294559026	-0.0110042
CTTAGGACTGAGGTGTAACCTTGG_2	2.14200288787057	-0.0120762
AGTGGATCAGAAGCGTACGTCGTA_2	2.37838835127468	-0.0132255
ATCGCCATCTGGAGTAGCAATTCG_2	2.22878144996336	-0.00895614
TGGTAGCTTACGGTTGTCACGTTC_2	2.19503847994961	0.0104389252735187
GAGCAGTAGAATCGTGTTCTCTCG_2	1.96414845442462	-0.0189687
TGTGACTGCTGACACACAAGCAGT_2	1.91554918118225	-0.0263215
TTCGTTGGGACGAATGAGGATCTG_2	2.01930922187876	0.00733764358471001
GATCGAGTCATTCGGTTCTCCGAT_2	2.09515116996582	0.00547016345820364
ACGGAACACCTACTGATCCGAGTT_2	2.18443201898346	-0.0317623
ATCACACGTCCGTATGGCTTCTTG_2	2.15869866876474	-0.0151382
CGCATGATTCTAACGCTCGACATC_2	1.88010294159786	-0.0150676
GAATCCGACAACCTAGGCCAGTAT_2	2.13813776409487	-0.0144813
GATCGAGTCAGTTCTGAACCTTGG_2	2.37869299191868	-0.00664241
TGTGACTGTACCAGGAAACCTCCT_2	1.91827448058907	-0.0204039
TGAAGACGCGTCAATGGCAATTCG_2	2.36183261042631	-0.0268123
GAACATCGCAGTTCTGTAGCCGAA_2	2.0500961876043	-0.0309516
AGCACTTCTGTGAAGCGCTTAGCT_2	1.94464194391039	-0.060354
ACGACTTGCTGACACAAGGATGGT_2	2.16198368702745	-0.0509122
CCTTGATCAGGTTCGAAACCTTGG_2	1.85212443827449	-0.0255452
CTGTTGACGATAGCGATCTGCTCT_2	2.01846791676642	-0.0376116
GTTGACCTCGGATTGATCGTGGAT_2	1.99223884384416	-0.00925521
TGAGCTAGTGGAGAGTGCTGTTGT_2	1.90238897672121	-0.048775
CTTGTCGAGATACTGGTGTGGTAC_2	2.45516227369899	-0.0440379
CTTGTCGAGATGCACTACTGTGTC_2	2.16716753798579	0.0303145605868503
CCTTGATCCGAGACTACATCTACG_2	2.4291535454576	-0.0293187
CGCAATCTAATGGACGACCATGTG_2	2.25171549476827	-0.0497731
GAATCCGATACATCGGCGTAGGTT_2	2.39714151732392	-0.0317713
CGCATGATGAGATGTCCGGAATAC_2	2.08337685080596	-0.00911555
CGCAATCTGAATCGTGGTTCATGG_2	2.14850061826367	-0.0194005
AGCGTGTTTACGGTTGCATAACGG_2	2.48437972997384	-0.0887464
GAAGGAAGCTTACAGCAGGTCACT_2	1.96725295051757	0.0185622109573741
GCTATCCTGACGAATGAACGGTCA_2	2.09929223535668	-0.0449098
AGTGGATCCGTACGAATACACGCT_2	1.86201074547265	-0.0267746
CAGTCCAATCGAACCAAACCGAAG_2	2.52094021272117	-0.0271515
AGCACTTCCCAAGTTGCAAGTGCA_2	1.97650682816361	-0.00826119
TGGTAGCTGTATGCTGGCATACAG_2	2.08558771343561	-0.072278
TTGCAGACGACTATGCTAGGATGC_2	2.03231887697405	-0.0261434
TGGCATGTCGTTATGCGACAAGAG_2	2.27739038582326	-0.0170637
GCTATCCTGTCAGTTGCAAGGTCT_2	2.06658903332152	-0.00717833
TTCGTTGGTACATCGGCGTGTACT_2	2.45081516294239	-0.0154317
ACGACTTGGATAGCGACCATACGT_2	2.15762959855136	-0.0232442
ATCACACGACTCGTTGTCTCCGAT_2	2.20524635980367	-0.049464
TGGTAGCTGAGGACTTAGGATGGT_2	2.18549673433999	-0.0149506
ATGCCTGTGCTGGATTCCATACGT_2	2.14981372613757	-0.0527423
CGCAATCTATTCGAGGTCCGAGTT_2	2.40540004084292	-0.026221
GAATCCGAACGATGACCATAACGG_2	2.06095069351581	-0.0090147
GATTGCTCGAGATACGAGGTCACT_2	2.13193679385151	-0.0510875
GAAGGAAGTACATCGGCCATACGT_2	1.78882627756128	-0.0229257
TTGGACGTCGGATTGAACCATGTG_2	2.08416850032785	-0.0270314
AGTGGATCTGAGGTGTGTAGCATC_2	2.24555346167992	0.017677148697629
GATTGCTCTACCAGGAACGGTCTT_2	2.0945299899419	-0.0220112
GTGAAGTGCGATAGAGGCTTAGCT_2	2.03250672684908	-0.0422115
GTGAAGTGGCTGGATTCTCAGCTA_2	2.13470836703472	-0.0248569
ACTGAGGTTGCCATTCTGCCTCTT_2	2.16523695772681	-0.00981929
GATAGGCTCTAGGCATTAGCCGAA_2	2.09266453976874	-0.0465635
CGTTGCAACTCATTGCTATCAGCG_2	2.14930905866718	-0.0391853
TTCCAAGGCTGACACACCAGTGTT_2	2.17664345400989	-0.0373338
TTGCAGACAAGGACACGTTCATGG_2	2.2065207501895	-0.0219241
TGAAGACGAATGCCTCCCATACGT_2	2.24285190184758	-0.0605859
CTTGTCGACTAGGTGAGATTGGAG_2	1.97332384180881	-0.020613
GACGATCTTTCAGGAGACCATGTG_2	2.18208019280561	-0.00564702
GCTATCCTTCTCTAGGCATGGAAC_2	2.10073025819876	0.0473040712706002
CTTAGGACGATGCACTTCACGTTC_2	2.1007166431205	-0.000778921
ATCACACGCCTACTGAAGCAGATG_2	2.02835263413576	-0.0374615
ATCGCCATTTGATCCGAGGATGGT_2	2.11133385896331	-0.0771063
TGGCATGTTGCCATTCACCTTCTC_2	2.18658880549068	-0.0376392
TATCGGTCCACAAGTCAACGGTCA_2	2.30735791824639	-0.0116248
GTTGTTCGTGAGGTGTTCTCCGAT_2	2.09718505870466	-0.0317321
ATCCGGTATGTGAAGCCGGAATAC_2	2.23891664482976	-0.0445844
TACGCCTTCCAAGTTGCTCAGCTA_2	2.14307916364599	-0.0396703
CGTTGCAATGGAGTTGCTAACTCG_2	2.00442742622669	0.00648751189813272
GTCATCGACTGACACATGCACCAA_2	2.43170811766355	-0.0686184
GTCGAAGAGCCTTGTTTGCGTAGA_2	2.06803563915702	-0.0342521
TGGACTCTAGCTCCTATGTGGTAC_2	2.12976421476734	-0.0177772
GATAGGCTAGGTTCGATTAGGTCG_2	2.17919021465153	-0.0543412
TTGGACGTACGTGATGCCTTCCTT_2	2.0841883025204	-0.0183701
GTTCTCGTACGATGACTGCACCAA_2	2.21559845815647	-0.0283429
ACGGAACAGTATGCTGTTCTCTCG_2	2.16696684592014	0.00504465043515749
AACGTCTGCTAGGTGAACCATGTG_2	1.81302932837281	-0.0140237
GTTGTTCGTGGAGTTGCATGGAAC_2	2.00372805844199	-0.0434151
AACGTCTGCTCTACTCTTAGGTCG_2	2.05499931904589	-0.0233685
GTCGAAGACTCAGAGTACTGTGTC_2	2.16479513126161	-0.00727068
CATGGCTAGTCGGTAATGTGGTAC_2	1.91000829514446	-0.0614164
TGAAGACGGATGCACTTTAGGTCG_2	1.97812529322257	-0.0388305
GAAGTTGGCTAGGTGAGCTGTTGT_2	1.7690515459566	0.000177744005496083
CGGCTAATCGCTAGTATGGTCCTT_2	2.11168889559788	-0.0533638
TATCGGTCTGGAGTTGTCGAGTGA_2	2.01621154763141	0.00106711156142104
GACGATCTATCGGTGTCAGTCTTC_2	1.96869892272835	-0.0410468
GTGAAGTGTAAGTGGCGCACGTAA_2	2.03355116813449	-0.0340449
TTCCAAGGGACTTAGGGCGTTCTA_2	1.87524381429515	-0.0150887
ACGACTTGGCTGGATTCTAACTCG_2	2.41051879850718	-0.0114754
ATGACGTCAAGGACACAGTCAGGA_2	1.98288028795004	-0.0125688
TACGCTACACCTAAGGCACCACTA_2	1.85480807684295	0.00953616508169566
AAGCACTGGTCGGTAATTGACAGG_2	1.62514150415179	-0.0179026
ATGCCTGTGTCGGTAACCATACGT_2	2.03659385734472	-0.049878
CAACACCTCCAAGTTGTCACGTTC_2	1.77018420982583	0.0133021753325329
CCGTAAGACTTACAGCCATCTACG_2	2.20945420981134	-0.0524792
AACGTCTGTGTGAAGCCCTTCCTT_2	2.12655559111718	-0.0570863
ACCACGATGATGCACTGCAATTCG_2	2.20547827656905	-0.0220122
GAAGGAAGATTCGAGGCTGCGTAT_2	2.37169216748631	-0.0480192
GCGTCATTCATTGCCTAGGCATAG_2	2.4069040664939	-0.052206
CACTAGCTAAGGACACGCTGTTGT_2	2.11469494310002	-0.00400698
GAAGTTGGTCGAAGGTGCAATTCG_2	2.35445601030599	0.00156772008641519
GTTGTTCGCGCTAGTATCCGAGTT_2	2.15592733695383	-0.0294705
CTTGTCGACCAAGTTGAACCGAAG_2	1.99611480844281	-0.0742061
AACGTCTGGCTCTGTATTCAGCCT_2	2.09269436871512	-0.0215252
TGGTAGCTGTATGCTGATGGAAGG_2	2.07062555951789	-0.0347943
GCGTCATTAGGTTCGACACCACTA_2	2.36948992441594	-0.0382794
TTCGTTGGTTCAGGAGCGATGCTT_2	1.84284309220231	0.0030296179550415
CGTGTGTACTCATTGCACCGCATA_2	2.24608726509662	-0.029654
ACCACGATCAGTTCTGAGGATGGT_2	2.2297934115097	-0.00463869
CCTTGATCAATGGACGTAGCCGAA_2	2.02834225829721	-0.0131543
GTCGAAGACGTTATGCTCCGAGTT_2	2.38434289551834	-0.0333877
CGCAATCTACCAGCTTGAGCTCAA_2	2.35977585591362	-0.0189265
GCTATCCTGCCTTGTTCTGCGTAT_2	2.22082491503551	-0.0107588
TCGCTGTTGTCCTAAGGCATACAG_2	2.04526478391101	-0.0456781
TTCCAAGGGTATGCTGTTGTCGGT_2	2.4447349036931	-0.0186963
GATTACCGATGGTTGCAACCTTGG_2	2.06766573683457	0.00751012628239876
CCTGATTGTCGAACCAAGCAGATG_2	2.10905013699728	-0.00766971
TTGCAGACTCTCGCAACGGAATAC_2	2.20347198263696	-0.0483094
AGCGTGTTCGATAGAGTATCAGCG_2	2.09238046452203	0.0109104697136837
CATACCACTCGAAGGTTTCAGCCT_2	2.02442925927042	-0.0549744
ACGGAACAGAAGAGGTACTGTGTC_2	2.14678254548122	-0.0309971
GTCATCGACGTACGAATCCGAGTT_2	1.98212331876225	-0.00965597
AACTGAGCAAGGACACATTCTGGC_2	1.84395774852256	-0.00365687
CGTGTGTACGACCATTTGTCCAGA_2	2.37962734019028	-0.0353445
CCTTGTAGGATACTGGTCTGAGAG_2	2.17866566583541	-0.0465458
ATCGATCGCTCTACTCGTAGCATC_2	1.93995	0.0036076567951063
CGGTTGTTAGTCGACAGCCAGTAT_2	2.37019748867374	-0.0465488
CAATGTGGCGGATTGAGTAGCATC_2	2.08862345811758	-0.0481286
TGGCATGTTCTCTAGGCTTCACCA_2	2.28790061097717	-0.0482342
GTGCCATAGCTGGATTCAGGTATC_2	1.98531298331858	0.0136724466816906
GATCGAGTAATGGACGCGTGTACT_2	2.10810429068918	-0.00423096
GAAGGAAGAATGGACGCCAGTGTT_2	2.39766277916627	-0.0486043
CGGTTGTTGTCTGATCAGGCATAG_2	1.65450628655765	-0.061482
ATGCCTGTCGGATTGACTACAGTG_2	1.85624938268156	0.00934741210889543
CGTTGCAACATTGCCTAGTCAGGA_2	2.21024297220427	-0.0385497
ATCACACGTCGAAGGTACCATGTG_2	2.12576126922629	0.00509801220429858
ATATGCGCGATGCACTGCTTCGAA_2	1.91585387396326	-0.0523062
ACAGCTCACTATCGCAGTTCATGG_2	2.03172889111329	-0.0304723
AGAGTAGCCGATAGAGCGGAATAC_2	2.43320414987893	-0.0201526
CTGATCGTACCTAAGGTGTCCAGA_2	2.43229982264867	-0.031094
ATGCCTGTTCCGTATGTTGACAGG_2	2.34038463712765	0.0129646478100289
CTTCGACTACCAATGCCATCTACG_2	2.43261745499363	-0.0161573
ATCCAGAGTTCAGGAGTTGACAGG_2	2.12354077143864	-0.00574646
TAACCGGTAGTCTGTGTCTCCGAT_2	2.17622151821921	-0.0367396
CTTCGACTCCAAGTTGCTGGTTCT_2	2.41655807611468	-0.0542992
AGTTCGTCCAACCTAGTGCGTAGA_2	2.39537924157571	-0.0369583
CACTAGCTGAGGACTTGCTGTTGT_2	2.1423102147871	-0.0346684
ACTCTCGAGTCAGTTGGATTGGAG_2	2.15109772281078	-0.0109536
GATTACCGCAACCTAGTGCGTAGA_2	1.99890142570054	-0.019647
AGCGTGTTCCAAGTTGCTAACTCG_2	2.4127107344643	-0.0395259
CCGTAAGATGGAGTTGTATCAGCG_2	2.16453147685526	-0.0228086
TGGACTCTAGTGCAGTAGTCAGGA_2	1.88191186765298	-0.061286
TATCGGTCTCCGTATGTCTCCGAT_2	2.06834612300505	-0.05205
AGAACGAGTTCAGGAGGCGTTCTA_2	2.11471880615591	-0.0424595
GTCGAAGACTGACACAACCATGTG_2	2.19297572485508	-0.022986
ACTCCATCCGAGACTATTCAGCCT_2	2.14449331772793	-0.0321506
ACAGCTCAACGTGATGAGCAGATG_2	2.06108989091525	-0.0559652
GATCGAGTCTCATTGCGCGTTCTA_2	2.19083025501447	-0.00333024
TTGCAGACCAATCGACCATCTACG_2	2.48382763619372	-0.0134742
AAGCACTGACATTGCGTCGTGGAT_2	1.61564710210336	-0.0486574
GCAAGATCCTCTACTCCAGGTATC_2	2.12041953885269	-0.0226596
TGGCATGTTCTCTAGGTCGTGGAT_2	2.11248846575703	-0.0397136
CGACGTTATCTCGCAACATGGAAC_2	2.13833719085109	-0.0463926
GTAGGAGTATCGGTGTTCGTAGTC_2	1.81064265090142	-0.0308231
TGGCATGTTACCAGGATCACGTTC_2	1.98988441818226	-0.077934
GTAGGAGTAGTCTGTGACATAGGC_2	2.06540390862345	-0.0227907
GTGAAGTGGAGATGTCTCGACATC_2	2.48878944215038	-0.0183751
TGAAGACGGTCTCCTTTCGTAGTC_2	2.39297456888833	-0.027279
GCTATCCTGAGATACGGTGTTCCT_2	2.07213970309544	-0.0423585
GACGATCTGCCATAACTCTGAGAG_2	2.13613672860558	-0.00520859
ACTGAGGTCATTGCCTGCTTCGAA_2	2.08323235916084	-0.00308067
CCTGATTGGATAGCGAGCATACAG_2	2.06157965117956	0.00225925600168489
TCGCTGTTGATAGCGACATCTACG_2	2.17129284150122	-0.0405571
ATCCGGTAGAATCGTGCTAACTCG_2	2.02411820709283	-0.0470734
CGGCTAATACATTGCGTCTGAGAG_2	2.09285679936733	-0.0304353
GCGTCATTTCTAACGCCAGGTATC_2	2.03930127052495	-0.0272188
TGTGACTGCTTGCTGTGCATACAG_2	2.04750810137482	-0.0238438
CTGATCGTTCGAAGGTTCACGTTC_2	2.02902859296581	-0.0194033
TCAGGCTTCAACCTAGCGAGTATG_2	2.10140595098913	-0.053832
TGAGCTAGCACAAGTCAACCTCCT_2	2.05357370950974	0.0045665721620447
TGCTTCCATACCAGGACCATACGT_2	2.06489271890025	-0.0249454
CATACCACCTGACACACACCACTA_2	1.84163817504842	-0.037393
CTGATCGTCAGAATCGACTGTGTC_2	2.1919706135866	-0.0223639
TGAAGACGAGTCGACACTTCACCA_2	2.12366565773167	-0.0551474
TCGCTGTTACCAGCTTAGGCATAG_2	2.06124774080972	-0.0409107
AGCACTTCTTCAGGAGGCTTAGCT_2	2.10422847294614	-0.0356781
AAGCACTGGACTATGCTGCGTAGA_2	1.74820392840924	-0.00688255
TACGCCTTGACTTAGGAGTCAGGA_2	2.07578917766296	-0.0403078
TTGCAGACGTCTCCTTTCCGAGTT_2	1.91770469770154	-0.0234367
TATCGGTCACCAGCTTGTCTAGGT_2	2.10233144438855	-0.0459388
GAAGTTGGAGTCTGTGCGAGTATG_2	2.25972673440019	-0.0350256
TGAAGACGGAACGCTTTCTGAGAG_2	1.9879876914632	-0.0145432
CGCATGATCCTACTGAAACGGTCA_2	1.86806488228967	0.00256399030543618
ACTGAGGTGCTGGATTCTAACTCG_2	2.18419450283247	-0.0349386
AACGTCTGCTATCGCATAGCCGAA_2	2.43178873096278	-0.044115
GTTACGCAACCTAAGGCAAGTGCA_2	2.07169867409543	-0.0535323
ACGTTCAGTCCGTATGTCGTGGAT_2	2.09134026804088	-0.00485892
ATGCCTGTAGTCGACACGTAGGTT_2	2.19031110141636	-0.035363
ATGCACGAGACGAATGGTTCATGG_2	2.27895533864607	0.000370456024756424

## Sheet: 3-L5D3
	Ribosome and fiborin genes	Hippo_signaling_pathway
ACTCTCGAGCTCTGTACGAACTGT_4	1.72579110416349	0.123581357837903
CGCTCTATACCAGCTTTTAGGTCG_4	1.67084433307448	0.274853477871832
GATTGCTCGCTCTGTAACTGTGTC_4	1.68317357317015	0.0478867617332317
AGAACGAGGCTCTGTACGTGTACT_4	1.57371403673152	0.165153934046193
AGTGGATCTGGAGTTGCGGAATAC_4	1.88365056717943	0.112559285194976
GCAAGATCTAGTTGCGTGTGGTAC_4	1.52341279672226	0.00846960096832208
TGCTTCCAGAGGACTTTTGACAGG_4	1.51419381008376	-0.106205
TGCTTCCAGCTCTGTACGTGTACT_4	1.86168199785082	0.0265408725100986
AGAACGAGGCTGGATTCATCTACG_4	1.60181441195197	-0.0461063
CTGATCGTTGGAGTTGACCGCATA_4	1.57594900575974	-0.0969741
GACGATCTCCAAGTTGGCTTCTTG_4	1.89589405702655	0.126328214276914
GTGAAGTGAGGTTCGAGATCGTAC_4	1.88013412840449	-0.0502175
TCAGGCTTGATAGCGATTCTCTCG_4	1.44405493103781	0.0133250654755827
ACAGCTCAAATGCCTCAACTGGTG_4	1.46819032542564	-0.0519292
CGTGTGTATCTCGCAAGACAAGAG_4	1.32255062699306	0.0866875060451327
CTGTTGACCTCATTGCGCGTTCTA_4	1.70199328975491	-0.0474214
GACGATCTGTCCTAAGAGTCAGGA_4	1.64100427896361	0.0525516159870678
TGAAGACGGTCCTAAGCAAGTGCA_4	1.56973389204289	0.000172660165761868
CGCTCTATCTCATTGCCATGGAAC_4	1.60152176969184	-0.0978085
CGGTTGTTACGTGATGCTCTGGTT_4	1.67194447580894	-0.156322
CTTAGGACGTATGCTGCATAACGG_4	1.63637167697198	-0.00796215
TGGTACAGAAGGACACACATAGGC_4	1.86208410684054	-0.0352626
TGGTACAGGATAGCGAGTGTTCCT_4	1.93281269699752	0.0735882179440637
TTGGACGTTCTCGCAACACCACTA_4	1.86101701243326	-0.0991
TTGGACGTTGCAGGTAATGGAAGG_4	1.66210978843064	0.170317106781742
GACGATCTATCGGTGTACCATGTG_4	1.6462038629188	-0.0473382
GATTGCTCTTCAGGAGTGTGGTAC_4	1.87196647699604	0.0559063925604787
CGGCTAATACTCGTTGACCTTCTC_4	1.65159591965848	0.160280091500871
CATGGCTACGAGACTAAACGGTCA_4	1.76877328047608	-0.0369646
CCTTGATCCCTACTGAGTCTAGGT_4	1.73253765873011	-0.0497683
CTTGTCGACTTGCTGTGCTTCTTG_4	1.85524706034566	-0.151346
GTTGACCTTGATCGGAAACCGAAG_4	1.65795370253475	0.0475175708246689
GAGCAGTATACATCGGCAGGTATC_4	1.81274706894814	-0.0013915
AGCACTTCCGGATTGACGAGTATG_4	1.52423952263467	-0.03547
CGTGTGTATCGAACCAACTGCTAG_4	1.86113274269552	-0.0363803
GATGTGTGTGCAGGTATAGGATGC_4	1.75180758339323	0.0422128630629332
ATCCGGTACTCTACTCCTGCGTAT_4	1.73692186224773	0.0665351621032054
ATGCACGAGTCGGTAAAACTGGTG_4	1.63683311899087	0.168263914713073
CGCATGATCTTACAGCAACCTCCT_4	1.54053565268194	-0.0429368
GATTGCTCCTCAGAGTTTGACAGG_4	1.82201759578554	0.00650398301757629
AGTTCGTCCGGATTGAATTCTGGC_4	1.81745947456531	0.0286070984894718
ATGACGTCCGATAGAGTAGGATGC_4	1.56057860008556	0.0729685669197723
CATGGCTATCCGTATGCAGCGATT_4	1.64218212059488	0.101673275892255
GTTGTTCGCTGGAGTAAACCGAAG_4	1.81867037831224	0.0536018741798382
AACTGAGCCTATCGCATACACGCT_4	1.78672173927424	-0.0374076
GAGACGATACTCGTTGCAGTCTTC_4	1.80268010827143	0.0528348919242182
TGGTAGCTAATGGACGTCGACATC_4	1.38177984938485	0.183220822623836
ACTCTCGAAGGAGGAACCAGTGTT_4	1.83383480522684	-0.092717
TGTGACTGTGCCATTCACCTTCTC_4	1.62127232408703	-0.113568
AACCGTTCGTCCTAAGCTCTGGTT_4	1.59947259816899	-0.0488485
CTTAGGACTTGGTCTCCGAACTGT_4	1.85546614821972	0.114034355905522
TGGTACAGCAACCTAGTCGTAGTC_4	1.93985032293886	0.00995360786912927
GATCGAGTCGATAGAGGTAGCATC_4	1.51053748408321	0.00160244766359036
GTGCCATATACGGTTGGATCGTAC_4	1.6989701791489	0.161802642428874
TCAGGCTTTAAGTGGCACTGTGTC_4	1.82102309786204	0.0647841943617267
CAATGTGGTTCAGGAGCGTAGGTT_4	1.47160228408308	0.0904343981976477
CCGTAAGAGAGGACTTAGGATCTG_4	1.87512119179893	-0.0870557
CGCATGATCGTACGAAGCGTTCTA_4	1.81213356180417	-0.0800701
GATTGCTCCAATCGACTAGGATGC_4	1.77201899476623	0.00491721673106696
GTTCTCGTACCAGCTTACCGCATA_4	1.58210551029496	0.00541273168980427
CGCATGATCTCTACTCCGAACTGT_4	1.7015454504699	0.00799294647416654
CGTGTGTACTAGGCATTGCGTAGA_4	1.95425332765904	-0.0537256
TGAAGACGACGTGATGCAGGTATC_4	1.81892670094895	0.0546829946531434
AACTGAGCGTCGGTAATCTCCGAT_4	1.43436358623121	-0.0466021
TTCCAAGGACCTAAGGAACTGGTG_4	1.94959364724066	0.0643666473762996
AGAGTAGCACCAGCTTTTGACAGG_4	1.64840557025558	0.0903939689409981
CCTTGATCCGAGACTACGGAATAC_4	1.89440145857339	0.00965329816277954
GTTCTCGTTGTGCGTTCAGGTATC_4	1.0971882336645	0.148075915792968
TGAGCTAGACGATGACGCAATTCG_4	1.94841250025127	-0.0489104
TGGTACAGTCTCGCAACCATACGT_4	1.84049000982059	0.0207861217301216
ATGCACGAAGTGCAGTTTGACAGG_4	1.76985349640369	0.00493126113691866
ATGCCTGTCCTACTGACTCAGCTA_4	1.68453163442706	-0.00852186
GATCGAGTGTCCTAAGGACAAGAG_4	1.69346533640954	-0.127986
GATTGCTCGATACTGGACAGCAAC_4	1.62216919509737	-0.101541
GTTCTCGTTACATCGGCAGTCTTC_4	1.53422902595319	0.0010415111153598
TACGCCTTTACCAGGACCTTCCTT_4	1.61925476150932	0.175969864305647
CAACACCTCATTGCCTGCACGTAA_4	1.74315537392493	-0.0922451
GAGCAGTACGACCATTCTAACTCG_4	1.74969606897723	-0.0338658
TATCGGTCACCAATGCCAAGTGCA_4	1.87807809304807	0.0212901422864049
ACGGAACAGACGAATGCAGTCTTC_4	1.87244339977751	-0.0938156
CAATGTGGCTAGGCATCATGGAAC_4	1.62013492079399	0.0127864351738181
CTTCGACTAGTGCAGTCAGTCTTC_4	1.61019363435547	-0.14858
GTAGGAGTAGAAGCGTCAAGCAGT_4	1.84424095832394	-0.0506954
GTTGACCTAGTGCAGTCTAACTCG_4	1.79082870041143	0.109578148429926
CCGTAAGATGGAGAGTGCTGTTGT_4	1.8402474233133	-0.0415259
CGACGTTAAGGCTTCTCTACAGTG_4	1.74577838613232	-0.00531731
GTTGTTCGAGGCTTCTAACCGAAG_4	1.95284753371828	-0.000559191
TTGGACGTACGATGACGCATACAG_4	1.82107584022355	-0.102235
ACGGAACACAGTTCTGTTGACAGG_4	1.40237824022442	0.0787357420306652
ATCCAGAGCAGTTCTGTATCAGCG_4	1.13243414447157	-0.0594963
CGGCTAATCGGATTGAGATTGGAG_4	1.89858610359193	0.0666733140165417
GACGATCTACGATGACTTGACAGG_4	1.51629870156855	-0.0674573
GACGATCTGAACGCTTCACCACTA_4	1.44129821547356	0.0452258739608451
TTGCGAAGAATGCCTCCTGGTTCT_4	1.80765686943187	0.0559120510390329
AGAGTAGCTGGAGAGTCGATGCTT_4	1.62108338766477	-0.0554044
CATGGCTAGTCTCCTTTGGTCCTT_4	1.7290361125273	-0.0467843
GTCATCGATCTCGCAATCCGAGTT_4	1.39546643640765	0.203510926007695
ATCCAGAGACCTAAGGTCTGAGAG_4	1.63286384814127	0.107724884154281
CATACCACGAAGAGGTGTTCATGG_4	1.80306347564202	-0.0222798
CGGTTGTTGTCAGTTGTCCGAGTT_4	1.4173738055681	0.0617819261594966
ATGCACGAACGTGATGGCTTAGCT_4	1.85524073451195	0.01017298091042
CCTTGATCTTGGTCTCACCATGTG_4	1.75406370203603	-0.0978255
GAAGTTGGAGGCTTCTACCTTCTC_4	1.69144890785474	-0.103896
TACGCCTTCGATAGAGAACTGGTG_4	1.51826021864619	-0.00237124
TGTGACTGAGTCGACATTGTCGGT_4	1.49810812913045	0.100863773000211
TTGGACGTGAGATGTCCATAACGG_4	2.04761794799677	-0.0319559
ATATGCGCTTGGTGAGGCGTTCTA_4	1.84841962583966	0.0170571414687417
ATCACACGCTAGGCATATGGAAGG_4	1.82714932714086	0.0998731672588672
CCTGATTGCCTACTGAAAGGCTGA_4	1.63155555305673	-0.0917409
TATCGGTCTCGAAGGTCTCTGGTT_4	1.99488337607729	-0.0874575
AACTGAGCCACAAGTCTCTGCTCT_4	1.5966190070318	0.0124001865838023
CGCATGATGTCTCCTTGCAATTCG_4	1.62990741156536	0.00124525000945361
CTGATCGTGACTATGCAGCAGATG_4	1.94435092208892	-0.100305
GCGTCATTTCTCTAGGAACCTTGG_4	1.95332488468266	-0.0538392
AACTGAGCACGTGATGTGCCTCTT_4	1.32127749316492	-0.062695
CGTTGCAATTGGTGAGCAAGGTCT_4	2.02133649392822	0.06128342409773
GACGATCTGTAGAGCAACATAGGC_4	1.64682968285721	-0.100132
ATGCCTGTAATGCCTCTCCGAGTT_4	1.80570339452148	-0.0874393
CATGGCTAGAATCGTGCTGGTTCT_4	1.9033489253057	-0.0280219
GAAGTTGGGATACTGGAAGAGCCA_4	1.73570464891826	0.109769125955801
GTCATCGACACAAGTCACTGTGTC_4	1.90956229696307	0.0574058580642239
TACGCCTTCGGATTGAATTCTGGC_4	1.72333024092342	-0.0275747
ACTCTCGACACAAGTCGATCGTAC_4	1.59478891537402	-0.0567959
ACTCTCGACGTTATGCATTCTGGC_4	1.47025758531128	-0.0119331
CTTGTCGACAATCGACCTTCGTTC_4	1.94654950346304	-0.0920532
TTGGACGTCAATCGACTGTGGTAC_4	1.59947128124053	0.092438586565244
AGCACTTCTGAGGTGTGCATACAG_4	1.80917526468275	0.00392044295984123
ATCACACGATTCGAGGGACAAGAG_4	1.84654167373919	-0.0990856
ATCCGGTATAGTTGCGTAGCCGAA_4	1.57750050546357	0.0960698788216129
CATGGCTAGAACGCTTTTCAGCCT_4	1.03279427778808	0.147832000216729
GAAGTTGGGAGATGTCTTGACAGG_4	1.79628181354678	-0.00169937
GTGAAGTGCTAGGCATTGCGTAGA_4	1.81421786981489	0.190520350447183
AACTGAGCACGATGACTCCGAGTT_4	1.86589577857694	-0.00322608
AACTGAGCTACGGTTGCGGAATAC_4	1.35420614416772	0.0346274718262812
CTTCGACTCACAAGTCTCGTAGTC_4	1.58914113924506	0.00382369138614891
TTGGACGTCAATCGACTCACGTTC_4	1.63494761288022	0.158841071186506
GTGAAGTGAGTCGACACAGTCTTC_4	1.53048692903557	-0.106507
TGAAGACGACGATGACAACCGAAG_4	1.89772680630053	-0.150518
ACCACGATTCGAAGGTCAAGGTCT_4	1.58653257140608	0.0941881401244859
ATCGCCATACCAATGCACCGCATA_4	1.72678965776361	0.0462390009880191
CTGATCGTCAATCGACTTAGGTCG_4	1.51588116409324	0.204743304070005
CTTAGGACGTCTCCTTCTGGTTCT_4	1.40132679417766	-0.0470839
GCGTCATTACATTGCGCAGGTATC_4	2.08515648493314	-0.144266
TGAGCTAGGAGGACTTGCTTCTTG_4	1.83439477843425	0.0711994210185605
AACCGTTCCTAGGTGAGCTTAGCT_4	1.88617996138427	0.0626793739684766
ATCCGGTAATTCGAGGCTACAGTG_4	1.51512533219735	0.0583818702553346
CCGTAAGACAGAATCGACTGTGTC_4	1.5341081922826	-0.164026
CGTGTGTAAGTGCAGTCTACAGTG_4	1.62903167321988	0.191627978369618
AGAACGAGTACATCGGCCAGTGTT_4	1.70825097046408	0.00617820726537996
CAATGTGGACATTGCGGCTTAGCT_4	1.78566052213295	0.0466714013206551
CATGGCTATACCAGGAATGGAAGG_4	1.7018417234776	0.144264842232995
CGTGTGTATGATCGGAGCCAGTAT_4	1.65723958779681	-0.0383822
ACGTTCAGGAGATACGACGTCGTA_4	2.17189533206146	-0.0313522
CTTAGGACGATAGCGACATAACGG_4	1.81738702323609	0.057536671589532
TTCCAAGGCTGACACATTAGGTCG_4	1.87003686005536	-0.0888548
AGTTCGTCGTCTGATCCATAACGG_4	1.78645085069884	-0.0424549
CAACACCTCGACCATTCCAGTGTT_4	1.57482052226819	-0.0524949
CGACGTTACTCATTGCACTGTGTC_4	1.75561894267064	-0.00477107
CATGGCTAAGTGCAGTCGAGTATG_4	1.74659303817476	-0.0463935
CGACGTTAGTATGCTGCTTCACCA_4	1.76175791364431	-0.0974906
TGGTACAGCGCTAGTACGATGCTT_4	1.81418985781142	0.0179499312583367
AGAGTAGCTGATCGGACCAGTGTT_4	1.8934441391807	0.00126784556313767
CCTGATTGGCCTTGTTTACACGCT_4	1.65095708897205	-0.0387452
GTTCTCGTTGTGAAGCACCTTCTC_4	1.80446692642932	0.0749528397005004
ACTGAGGTACTCGTTGCGAGTATG_4	1.60589819849554	0.0482402504676901
GTTCTCGTACTCGTTGCGTAGGTT_4	1.68021727391103	-0.0483544
TTGCAGACAATGGACGTATCAGCG_4	1.69942393596653	0.00459337868152607
GATCGAGTAGGCTTCTAGGATCTG_4	1.69637684043682	-0.0403196
TGTGACTGCTCAGAGTTATCAGCG_4	1.54343771200088	0.0450550472352909
CTGATCGTTCGAACCAACGTCGTA_4	1.4638166209051	0.12161953288281
ACTCCATCGCCATAACCATAACGG_4	1.47327212227432	-0.114374
ACTCCATCGCCATAACCATCTACG_4	1.65904860169877	0.0469373102166597
CTTAGGACAGGTTCGAATGGAAGG_4	1.77674805395541	0.00451613518162514
GATTACCGCGTCAATGTTCAGCCT_4	1.76118098526355	0.119378246986648
TGCTTCCAACCTAAGGGAGCTCAA_4	1.48679519900635	-0.0525047
ACTCTCGATCGAAGGTGTTCATGG_4	1.9411683325106	-0.0408977
ACTCCATCCCAAGTTGCATAACGG_4	1.82947976741916	0.0331975438614104
ACTCCATCGCTCTGTACATCTACG_4	1.44713932398189	0.156154140988925
ATGACGTCCAGAATCGTCGACATC_4	1.59038689921259	0.0420097668938479
ATGCACGATGTGAAGCAACCTTGG_4	1.63592872768185	0.298180487272482
CTTAGGACTGCCATTCACCATGTG_4	2.07163939720086	0.0720695904486911
GAAGTTGGTCTCTAGGAGTCAGGA_4	1.84718096991732	-0.104509
GATTGCTCCAATCGACGCTTAGCT_4	1.68611189704939	0.0962862026536103
ACAGCTCAACCAATGCAGGATGGT_4	1.52676885411685	0.0720511063173012
GATCGAGTACCAGCTTCTTCACCA_4	1.66017926467038	-0.0778748
AGTTCGTCTGCCATTCTCGTAGTC_4	1.87031734967621	0.115639505198569
CCTTGATCAAGGACACCTGCGTAT_4	1.92793320135115	-0.0347781
CCTTGTAGTGCAGGTACTTCGTTC_4	1.97458878701716	-0.146552
GTTGACCTTGCCATTCCCATACGT_4	1.68988496459912	-0.0407646
TCAGGCTTTGCCATTCTTGACAGG_4	1.83324563164446	0.0357032315210892
ACAGCTCAGAATCGTGCCAGTGTT_4	1.6656849796836	-0.0430191
GTCATCGAAGGAGGAACATGGAAC_4	2.02858140740713	-0.0870471
TATCGGTCGTAGAGCACTGCGTAT_4	1.89118405938415	0.170984014149166
TGAAGACGCTAGGTGACATGGAAC_4	1.65721507867891	-0.0830886
TTCGTTGGGTCGGTAACAGTCTTC_4	1.34877	0.0842927374749084
GTCATCGACAATCGACCGAACTGT_4	1.70161884692428	-0.00497311
ATGCACGAGACTTAGGAGGATGGT_4	1.66897308261745	-0.00200057
GAAGTTGGACTCGTTGCTCTGGTT_4	1.37936432050835	-0.000684034
GAAGTTGGCTCTACTCACAGCAAC_4	1.70314472346273	0.134849984068279
AGAACGAGTCTAACGCACGGTCTT_4	1.73581226512741	0.0111646430177686
ATATGCGCTGGAGAGTCAGTCTTC_4	1.73536316671279	0.188364298834676
ATCGATCGATTCGAGGCAAGTGCA_4	1.62676726460723	0.0360723050171356
GATTGCTCAAGGACACGCTTAGCT_4	1.34457519617618	-0.0742788
TGGCATGTGTCCTAAGACCGCATA_4	1.90927215305093	-0.0580562
ACTGAGGTAGTCGACATGGTCCTT_4	1.97194833660614	-0.134289
AGCACTTCACGATGACTTCAGCCT_4	1.73327014396752	0.151550925927184
ACAGCTCATAAGTGGCCGGAATAC_4	1.91544305653414	-0.0527005
GTTCTCGTACTCGTTGCCTTCCTT_4	1.80959663603502	0.0649277416997797
ACAGCTCAATTCGAGGAACTGGTG_4	1.74476498063101	-0.102626
ACTCCATCGATGCACTACCGCATA_4	1.72848386984725	-0.00925399
ACTCCATCTGATCGGATGTGGTAC_4	1.77188627011077	-0.0238857
CGGTTGTTAGGTTCGAACTGTGTC_4	1.71290680463529	0.157780011372906
CTGATCGTAGTGCAGTCAGGTATC_4	1.58171307076549	-0.0995381
GAAGTTGGGATGCACTTTGACAGG_4	1.78607122078045	0.152618656335294
ACTCTCGAGTAGAGCAAGTCAGGA_4	1.68634856375614	-0.143856
CTTAGGACCGTCAATGAGCAGATG_4	1.69486698821549	0.10219079553276
GATCGAGTGAATCGTGGCATACAG_4	1.66542805185669	-0.119311
GTTCTCGTGACTTAGGACCTTCTC_4	1.83688665505108	0.0942509945454567
AGAACGAGGAGGACTTCGATGCTT_4	1.62140095910867	0.0987814854161856
CATACCACTGTGCGTTAGGCATAG_4	1.86796817108185	0.0621716323697739
CGCTCTATTGTGAAGCTCAGACGA_4	1.92637706107607	-0.0314398
AGTGGATCCCGACTATTACACGCT_4	1.78472983863366	-0.146994
ATGACGTCATCGGTGTTATCAGCG_4	1.57152408709159	-0.0432852
TTCGTTGGCAGAATCGGTCTAGGT_4	1.65328522126976	-0.10079
ACAGCTCAACGATGACCAAGGTCT_4	1.9331235678524	0.208127504486731
AGCGTGTTGCCTTGTTCATCTACG_4	1.78379870142604	0.0410493639045627
AGTGGATCGTCAGTTGAGGCATAG_4	1.85984219170752	-0.00186297
ACGTTCAGTCTCTAGGAGGCATAG_4	1.66159147083257	0.0707757597315104
CATGGCTATGAGGTGTGCATACAG_4	1.57396173199282	0.0182878382854664
CGGTTGTTCAGTTCTGTCCGAGTT_4	1.55336883350001	0.0318584008455352
ATCGATCGCACAAGTCCTTCGTTC_4	1.67953849193279	-0.0511585
AACCGTTCGATAGCGACGTAGGTT_4	1.83814386967186	0.0124299320189994
ACTCCATCAGCTCCTACAAGGTCT_4	1.39469102147821	-0.0212273
ATGACGTCCAACCTAGTTAGGTCG_4	1.85073357114447	0.0515939795937321
ATGCACGAGAAGAGGTTACACGCT_4	1.66883687394384	-0.104325
CATACCACCTTACAGCCGAGTATG_4	1.77865950994173	0.0118056437419886
GTTGACCTTCTAACGCAGGCATAG_4	1.45644723847763	-0.104093
GATCGAGTTCTAACGCACAGCAAC_4	1.56793074719564	0.203586133224579
CGACGTTATTACCGAGCGAACTGT_4	1.41545836166205	-0.0133583
CTGATCGTGTATGCTGTTACGGCT_4	1.60431393967643	0.0785127123061285
ATCGATCGAGTCGACATACACGCT_4	1.89310562033312	-0.0942336
ACTCCATCGAGGACTTGCTTCGAA_4	1.66644508151056	0.0398378783006979
CCTTGATCGTCAGTTGAACGGTCA_4	1.61093635306081	-0.0500864
GATTGCTCTGCAGGTACTAACTCG_4	1.62964661859202	0.0214857204529141
ACAGCTCAACTCGTTGTTGTCGGT_4	1.89988032752723	-0.0364709
ACTAGGAGATGGTTGCGTGTTCCT_4	1.78967974725232	-0.0541272
ATGACGTCGACTATGCCTAACTCG_4	1.65408123658797	-0.0966028
CTGTTGACACCAGCTTCTAACTCG_4	1.53843250441065	0.0510206233175832
GTGAAGTGGCCATAACAACTGGTG_4	1.95201178491902	-0.0985823
CGGTTGTTGACTATGCGACAAGAG_4	1.57513625944359	0.0256088706990029
GATTGCTCTTGGTGAGCACTGACA_4	1.66302607793744	-0.0716195
AGAGTAGCGCTCTGTACTAACTCG_4	1.73598228945986	0.035556046647491
ATATGCGCAGTCTGTGAACCTCCT_4	1.47854299550459	-0.153027
ATGCCTGTGAGATGTCCAGCGATT_4	1.17884013345568	-0.0755233
CTGATCGTTCTCTAGGTAGCCGAA_4	1.83223604062176	-0.0429706
CTTAGGACAGTCGACACGTGTACT_4	1.74605517070275	0.0247744020780064
AACCGTTCCTCAGAGTATTCTGGC_4	1.87866353646909	0.0529739088157097
CCTTGTAGCTAGGTGACTGCGTAT_4	1.6633984621477	0.159111335447752
CGGCTAATAATGGACGTTGTCGGT_4	1.60743372270626	-0.0157316
CTTGTCGATGGAGTTGGCTTCTTG_4	1.79526141661078	0.0394782163374612
GTTGACCTTGGAGAGTGCGTTCTA_4	1.88631657135227	0.0413067453303728
TACGCCTTCGGATTGAAACTGGTG_4	1.93453	-0.00420872
AACCGTTCGTAGAGCACCTTCCTT_4	1.51445589198695	0.0488975623071299
AGAACGAGCAATCGACGCCAGTAT_4	1.74786389130074	0.148524883780667
ATGACGTCTCCGTATGGCTGTTGT_4	1.87506982362544	0.0636042250309559
GAATCCGAATGGTTGCCGAACTGT_4	1.95315847552921	-0.0203182
GAATCCGAGTCGGTAACTGCGTAT_4	1.89460287470929	0.0525453148355846
ACGGAACACCTACTGAGCTTCGAA_4	1.66319630408522	-0.0108835
GAACATCGGTCAGTTGTTAGGTCG_4	2.00525028341412	-0.0940302
CGGCTAATTTGGTCTCGTATTGGC_4	1.68375908303834	0.158370895091461
AGAACGAGGCCATAACCATCTACG_4	1.64798730865384	0.116594353553482
AGAGTAGCACGATGACTTAGGTCG_4	1.8774346340072	0.00390385834570123
CTTCGACTGAAGAGGTCGAGTATG_4	1.82698765229319	-0.0991548
GAGCAGTATACGGTTGAACCTCCT_4	1.2978502296521	0.000145174881782895
AACTGAGCCTATCGCAGTGTTCCT_4	1.59812250607523	-0.0677554
ACTGAGGTTTGGTGAGTCACGTTC_4	1.94046093591314	-0.0985049
CTTAGGACTGGAGTTGCAAGTGCA_4	1.7570242969588	0.102071203037801
GTAGGAGTTTCAGGAGACCTTCTC_4	1.68512947915421	-0.110899
TGGCATGTGTCTCCTTCCAGTGTT_4	2.0467304215433	0.00362463927499759
AGCGTGTTTGATCGGACCATACGT_4	1.66207004081567	-0.00949937
ATCGATCGGTCTGATCGCATACAG_4	1.75651816072414	0.0228896562771957
TTCGTTGGTACCAGGAGTCTAGGT_4	1.85275552503946	0.0902001934660783
CGCATGATCGAGACTAGCAATTCG_4	1.98215751219571	0.151351663802298
CATGGCTAGATACTGGACCGCATA_4	1.74734132653697	0.00797395119965816
GACGATCTGAGGACTTGATCGTAC_4	1.55745729938336	0.0957058759939156
AGAGTAGCCTTACAGCGCGTTCTA_4	1.65407	-0.108328
AGCACTTCCGAGACTAGTATTGGC_4	1.78531951378855	-0.00703106
GAAGTTGGCAATCGACCGTAGGTT_4	1.84293238000239	-0.101984
TTCCAAGGAGTCGACAACCTTCTC_4	1.86372423961249	0.0363247155945419
TCAGGCTTCGTCAATGCATCTACG_4	1.70768517189732	0.103272245824837
CATGGCTACGATAGAGCGTGTACT_4	1.70579584318179	-0.0532357
CCGTAAGATACGGTTGTTAGGTCG_4	1.89646058352514	0.0489632508763204
CCTTGATCCGTCAATGACCATGTG_4	1.89335970385298	0.0695369588948635
GATTACCGTGCAGGTAAGGATCTG_4	1.84048727018121	-0.00884213
GTGAAGTGGCCATAACAACGGTCA_4	1.8802523201779	-0.107443
AACTGAGCCCGACTATACCTTCTC_4	1.79644491679165	-0.055569
ACCACGATAGGAGGAAGCCAGTAT_4	1.56729725082465	0.100139339994668
ATATGCGCAGGAGGAATTGTCGGT_4	1.4830949882631	0.131183796879704
CCTGATTGTCTAACGCGCTTAGCT_4	1.65822658756789	-0.152822
CGTTGCAAGCTCTGTATTACGGCT_4	1.5829098282437	0.0478301615325638
TGGACTCTACCAATGCCACTGACA_4	1.93114484961025	-0.0963533
AACTGAGCTCGAAGGTTGTGGTAC_4	1.53480568633518	0.0787997441751085
ATATGCGCACCAATGCATGGAAGG_4	1.85821468516165	-0.118106
ATGACGTCCACAAGTCTAGGATGC_4	1.6567034884498	-0.00840517
CTTCGACTTACATCGGCGAGTATG_4	1.60165736107995	0.100858382605147
ACCACGATAGGAGGAACCATACGT_4	1.86053359539339	-0.00999564
AGAACGAGAGGCTTCTGTGTTCCT_4	1.40049752150455	0.0310270084789349
CGACGTTAAGGTTCGACCAGTGTT_4	1.98036039849521	0.0474713088729581
CGACGTTACTATCGCAAACCTTGG_4	1.89119535675249	-0.00553278
TATCGGTCGACTTAGGTGCGTAGA_4	1.56042524945633	0.0559656744619771
CGCTCTATCCGACTATACCATGTG_4	1.80262239184023	0.116211410937165
GCACAACTCACAAGTCAACCTCCT_4	1.53949750802753	0.0992472572770669
TGGTACAGAAGGACACTGTGGTAC_4	1.96354987231511	-0.115469
ACTCCATCCTAGGTGACAAGGTCT_4	1.90850749224957	-0.00173224
ATGCCTGTTGTGCGTTGACAAGAG_4	1.92866444065528	-0.0167452
CTTAGGACTTGATCCGCGAACTGT_4	1.8915562807809	0.10924893058995
AGCACTTCCGTACGAAAGGATCTG_4	1.84156448942566	-0.00111641
GCTATCCTGAACGCTTCAAGGTCT_4	1.63143375013501	0.1500879330802
GCTATCCTTGGAGAGTACCATGTG_4	1.5128848634389	0.0703656885591787
GTTGACCTCGATAGAGTCTGAGAG_4	1.3426128230972	0.0747741906445618
AGAGTAGCCTGGAGTACTACAGTG_4	1.6139228088734	-0.00288249
CGTGTGTACTCTACTCTGGTCCTT_4	1.64027565857232	0.243047568516575
TACGCCTTCTCAGAGTCGTAGGTT_4	1.34915713536335	0.200721406500725
TCAGGCTTCTGACACAACGTCGTA_4	1.3597030674988	-0.117961
GATGTGTGCTCAGAGTTCTGCTCT_4	1.79598544350687	0.135173616700779
CCTGATTGTCTCTAGGTAGGATGC_4	1.91222860646429	0.0476030611713381
CGCTCTATTAGTTGCGACGTCGTA_4	1.72308895464611	0.00989350282663953
CTTGTCGAAATGGACGGCTGTTGT_4	1.69248917339261	0.0878376980736761
CTGATCGTAATGCCTCAAGAGCCA_4	1.95603798464888	-0.110139
TACGCTACAGGCTTCTCCATACGT_4	1.60715029852838	-0.0521688
AACTGAGCGATAGCGATTGTCGGT_4	1.57894071746297	0.0441972985736744
AGAGTAGCGTCAGTTGTGCACCAA_4	1.99792650224282	-0.054013
AGCACTTCGTCTGATCCCTTCCTT_4	1.3174934518778	-0.0264083
CATACCACAATGGACGATTCTGGC_4	1.32939064811206	0.0336886756605651
CGGCTAATAAGGACACTTCAGCCT_4	1.91551270644906	-0.00536352
ACCACGATAGAAGCGTGCATACAG_4	1.62664374073035	0.0179029710749934
GACGATCTGATAGCGAGCATACAG_4	1.61749469971351	-0.10557
GTCGAAGAATTCGAGGTGTGGTAC_4	1.78801546898099	-0.093538
TGCTTCCACGGATTGAGCTGTTGT_4	1.14820860538361	0.0313713897861575
AGAACGAGTTGGTGAGCGTGTACT_4	1.49145382648892	0.136749402299008
CACCTGTTAGGAGGAACGGAATAC_4	2.16519145539845	-0.10124
TACGCCTTCCGACTATGCAATTCG_4	1.57763053949669	0.00161896055160976
AACTGAGCGTATGCTGCTTCGTTC_4	1.86627776271384	0.0593217138788433
ATGCCTGTGTCCTAAGTCTGAGAG_4	1.44379230751965	-0.0148793
GCAAGATCGAACGCTTCGAACTGT_4	1.60280050573892	-0.0036472
TTCCAAGGTGTGCGTTTCTGCTCT_4	1.33033466792304	0.097528124247872
CGACGTTAGCTGGATTAAGAGCCA_4	1.68210060101257	0.098874767729204
GAAGTTGGAGTCGACAGTATTGGC_4	1.85415094484673	-0.0580471
TACGCCTTTGTGAAGCTCTCCGAT_4	1.88330233276956	0.0152366233257615
CCGTAAGAACGATGACTCTGAGAG_4	1.74967468579285	-0.109935
AACCGTTCTACATCGGCGAGTATG_4	1.89563926198751	-0.1039
CAACACCTCGGATTGACTCAGCTA_4	1.88489395563183	-0.049254
CGACGTTATGTGCGTTGCTTCTTG_4	1.8630030072207	-0.049628
CTTAGGACTACCAGGATCGTGGAT_4	1.83131393906804	0.0944563640642828
GTCGAAGACGTCAATGCAAGTGCA_4	1.80759035402081	-0.00268651
GTTCTCGTGATAGCGATCCGAGTT_4	1.78486506748732	-0.0623636
ATCGATCGGTAGAGCAGCAATTCG_4	1.83898766255081	-0.00958242
CGACGTTAACCAATGCCTAACTCG_4	1.48922635534048	0.0352023348592097
GTAGGAGTTCTCGCAATGTCCAGA_4	1.57116589442832	-0.0607912
GTCATCGACCAAGTTGCTGCGTAT_4	1.62943786025975	-0.0850109
ATATGCGCCTATCGCACTAACTCG_4	1.25711727722757	0.0438216141647721
CAACACCTCGTACGAATGCCTCTT_4	1.47364818885934	0.0599280478411787
GAAGGAAGTGAGGTGTAACTGGTG_4	1.90439964444869	-0.089506
CGCTCTATGTCTCCTTCGGAATAC_4	1.60713669731119	0.0863327648885307
CCTGATTGAGTCGACATGTGGTAC_4	1.85041779369905	0.0113724511244916
GTTGACCTTTGATCCGACCTTCTC_4	1.41830587630711	0.0302785119893588
TTCCAAGGTGCCATTCATTCTGGC_4	1.64241766382303	0.110404632920736
ATCCAGAGTTGGTCTCACGGTCTT_4	1.81558827881689	-0.0148412
CCTGATTGAGGCTTCTACCGCATA_4	1.90847253857675	-0.0482763
CTGATCGTGACGAATGCTTCACCA_4	1.68304394823245	0.131488263729144
TCAGGCTTTCTCTAGGTTCTCTCG_4	1.88441737128828	-0.106829
TGGTAGCTTGAGGTGTCAAGGTCT_4	1.90030204961245	-0.0870322
GATTGCTCACTCGTTGCTGCGTAT_4	1.89917273404038	-0.0221631
GTTACGCACTTACAGCAGGATCTG_4	1.82188034787608	-0.0637292
ATCCAGAGGAGGACTTACCATGTG_4	1.91505524076925	0.0655547327204586
CGTGTGTACTTGCTGTTGTCCAGA_4	1.86321799977177	0.0774154678618477
GCTATCCTTCGAACCAACCGCATA_4	1.91521910966631	-0.163782
TACGCCTTAGAAGCGTTCCGAGTT_4	1.7324737778541	-0.0355832
ATATGCGCCATTGCCTTCGAGTGA_4	1.72663016762328	-0.016689
CGGCTAATCTAGGTGAACTGTGTC_4	1.92020342095712	-0.149923
CTTCGACTCATTCGGTCTGCGTAT_4	1.83451930575906	0.0991899889521893
TGGTACAGAGTGCAGTCTTCGTTC_4	1.74483661084819	0.139624166905978
ACCACGATTCTCTAGGTTAGGTCG_4	1.53592982292776	0.149883088565963
ATGACGTCTTCAGGAGCAAGGTCT_4	1.83312692856241	-0.0447228
CTTAGGACATTCGAGGTGTGGTAC_4	1.84157925150719	-0.110779
GCAAGATCAGGAGGAATCTCCGAT_4	1.58149025106461	-0.00930954
AGAGTAGCCTCATTGCCGTAGGTT_4	1.94249923918335	-0.0872615
ATCCGGTAGCCATAACACGTCGTA_4	1.82635156937666	-0.017467
GAAGTTGGCAACCTAGAACCTCCT_4	1.73522425762294	-0.0143648
GTTGACCTCGAGACTACTGGTTCT_4	1.89783726666454	-0.109163
TTGGACGTCGACCATTCAGGTATC_4	1.87925483996508	0.148762618331238
CTGATCGTCATTGCCTACTGTGTC_4	1.53927871251106	0.0456711750823689
GAAGGAAGCATTCGGTATTCTGGC_4	1.91419711873778	-0.00929953
GAATCCGACAACCTAGACCATGTG_4	1.96523395116103	0.0227192930015891
GTAGGAGTTACCAGGACGATGCTT_4	1.86458490583531	-0.0163056
GTTCTCGTTGTGCGTTACATAGGC_4	1.64696762533266	0.07520073195364
TCAGGCTTCGTCAATGTCAGACGA_4	1.87839376212094	-0.0578891
TGTGACTGCTGACACAGCTTCGAA_4	1.74777553257178	0.0174874715105729
ACAGCTCATCTCGCAACAAGGTCT_4	1.59604157824239	0.298564581148029
CCTGATTGAGGCTTCTCAAGGTCT_4	1.47834438252177	0.26182313829122
CGCATGATAGGTTCGACGATGCTT_4	1.69570923372452	-0.0311445
CTTAGGACTGCAGGTAGTAGCATC_4	1.61261504398175	0.0900086536507458
ATCCGGTACAATCGACTGTGGTAC_4	1.72159074220563	-0.0012535
CGGCTAATCGTCAATGAACCGAAG_4	1.31780605442815	-0.126542
ATGACGTCCCTACTGATTGTCGGT_4	1.49434332295106	0.0121659741367565
CCGTAAGACTTGCTGTTCAGACGA_4	1.86428139848394	-0.157632
CTTAGGACAGGAGGAATCACGTTC_4	1.57254501455857	-0.0221483
GACGATCTCATTGCCTCGTAGGTT_4	1.3680803296664	0.044038718885024
TTCCAAGGCTCAGAGTACCATGTG_4	1.88087826878225	0.138723210998084
AGTTCGTCTACATCGGAACGGTCA_4	1.49728995363451	-0.0194943
ATGCACGAGAACGCTTAGGATCTG_4	1.67169593277475	-0.00366559
CATGGCTAGCTCTGTAATTCTGGC_4	1.94297640099966	0.0771820283658076
GATAGGCTGACTATGCACAGCAAC_4	1.5297840246766	0.0297350273992714
ATGACGTCCAATCGACCTTCGTTC_4	1.66220330517309	-0.0786946
CCTTGATCCCGACTATTTAGGTCG_4	1.88215088463669	-0.00983299
CGCTCTATCGACCATTCATGGAAC_4	1.64434495752523	0.00442750571782313
GAAGTTGGACGTGATGAACTGGTG_4	1.65314029772519	-0.0757715
GAGCAGTATTGGTCTCCCAGTGTT_4	1.98373694759463	-0.049757
GTTCTCGTCTCATTGCTCGTGGAT_4	1.63626826082763	0.0378179831031906
TGCTTCCAACCAATGCGCCAGTAT_4	1.74315792154867	0.00614169633051237
AACTGAGCGTCGGTAAGATCGTAC_4	1.32131324782112	-0.0214658
ATCGATCGTGATCGGATCGACATC_4	1.83318377168022	-0.102164
ACAGCTCATCCGTATGTTGTCGGT_4	1.47408044699336	0.0171196731232935
AGCGTGTTCGACCATTCACTGACA_4	1.50017817343558	0.106959176159233
TCAGGCTTTACCAGGATTCTCTCG_4	1.36644063627838	-0.0739598
ATATGCGCCTGGAGTACAGTCTTC_4	1.55226722197902	0.145764497345824
GACGATCTAATGCCTCGTATTGGC_4	1.91315428917303	0.0539403469284403
TACGCCTTCTAGGTGAACGTCGTA_4	1.7054531875564	0.105790832600645
CGGCTAATTCGAACCACCTTCCTT_4	1.83451599133775	-0.0301039
TACGCCTTAGGAGGAATAGCCGAA_4	1.75648646391204	-0.0138276
TTGGACGTGAGGACTTTCTCCGAT_4	1.85272328230303	-0.000190096
AAGCACTGCGATAGAGACTGCTAG_4	1.9738643109131	0.0199903469714757
CGCATGATTGGAGAGTTTCTCTCG_4	1.83843447225298	-0.018951
GAAGTTGGGTCGGTAACGATGCTT_4	1.86988637060981	-0.0587245
GACGATCTGTCAGTTGCCAGTGTT_4	1.77527027993788	-0.0475621
TTGGACGTGAAGAGGTTCTCCGAT_4	1.86307419422057	-0.0632314
ATGCACGATCCGTATGTGCACCAA_4	1.56588656728289	0.0300270061857134
AGTTCGTCATGGTTGCCGATGCTT_4	1.71390753024029	0.0257583483114598
TGGTACAGCGTCAATGGATCGTAC_4	1.42311553289046	-0.109808
CGTGTGTAGAGATACGTCGTAGTC_4	1.68030454453969	0.0333954184801001
GAGACGATTGTGCGTTCCTTCCTT_4	1.90747305444327	0.0353392887864575
GATGTGTGATTCGAGGCAGTCTTC_4	2.0131237371527	-0.0528725
GATTGCTCGTAGAGCACTGCGTAT_4	1.8045499923661	-0.0157824
ACAGCTCAAAGGACACCCATACGT_4	1.97233216015944	-0.102269
TCGCTGTTCTCATTGCTCACGTTC_4	1.83516926247232	0.034527622940838
GATGTGTGGAGATGTCTCGTGGAT_4	1.68266489538834	0.0953914299188833
ACGTTCAGAGTGCAGTGACAAGAG_4	1.76801651069537	0.0346921887928686
ACTCTCGAGAAGAGGTACCATGTG_4	1.57882989332021	0.154855907266068
CAACACCTAGGTTCGACATGGAAC_4	1.72272505919683	0.0888584249290246
TCAGGCTTGCCATAACTCTCCGAT_4	1.90422086217851	-0.049489
CGCATGATTCTAACGCAGGATGGT_4	1.71726511196259	0.00132545133674972
CTGTTGACACCTAAGGACTGCTAG_4	1.57945609272797	0.000330017038199348
GATCGAGTGACGAATGTGCACCAA_4	1.68802971673019	0.0128151653556603
TGAGCTAGGATAGCGATGCCTCTT_4	1.97159964604293	0.123665307770596
TTGGACGTCCTACTGATTGACAGG_4	1.52416968928105	0.0390610318204228
ATGCCTGTCATTGCCTGTGTTCCT_4	1.97998057174732	0.0396102418296017
GTCGAAGACTGGAGTATCTGCTCT_4	1.65853688435857	0.036896301600492
ATCCAGAGACCTAAGGCAAGTGCA_4	1.80446354342777	-0.0580035
ACAGCTCAAATGCCTCCATGGAAC_4	1.92179276104826	-0.00809674
AGTGGATCAGCTCCTATATCAGCG_4	1.88922839817533	-0.0658016
ATATGCGCAGTCTGTGTCAGACGA_4	1.88859579275331	-0.0827055
GTGCCATAGACGAATGCGATGCTT_4	1.86529741521896	0.0774687217407019
TACGCCTTCTCATTGCACGTCGTA_4	1.99930152366594	-0.0383184
ACTAGGAGCTCTACTCAGCAGATG_4	1.59707763983882	0.00339752026682691
GTCATCGAACGATGACGCTTAGCT_4	1.7381825585253	0.082626398316384
CTGATCGTGATAGCGAAACTGGTG_4	1.85324394901688	0.0408153503117055
ATGACGTCCTTGCTGTTGCCTCTT_4	1.36701941083649	0.0354059337905278
CATGGCTAGTCCTAAGAAGAGCCA_4	1.70521993426157	0.0842115733246772
TCAGGCTTTCTCTAGGACCTTCTC_4	1.41843380608961	0.0170850695721761
TTCGTTGGGTCTGATCACAGCAAC_4	1.67706624486669	0.0526037522216111
ATGACGTCACATTGCGCATAACGG_4	1.72436521531462	0.105048386490929
ACAGCTCATGATCGGACGTGTACT_4	1.75301926973075	0.0319268664372403
CATGGCTAATTCGAGGGCGTTCTA_4	1.69258922704839	-0.0269198
CCTTGATCTGGAGAGTTCCGAGTT_4	1.90209404986398	-0.113999
CGTTGCAAACTCGTTGTGTCCAGA_4	1.8772910740379	-0.056613
GTTGTTCGCGGATTGAGCCAGTAT_4	1.7706413242212	0.0261027729974061
TTGGACGTGAGATACGTTAGGTCG_4	1.93855233747132	-0.00408087
AGAGTAGCGCTGGATTTTGTCGGT_4	1.73255991700982	-0.0342242
CCTGATTGACATTGCGAAGAGCCA_4	1.34318687514242	0.0136442724016549
CGTGTGTACTCATTGCCAAGGTCT_4	1.85699494125141	-0.0976529
ACAGCTCAAGGCTTCTTAGCCGAA_4	1.39547093337002	0.0233982638745256
CTTAGGACCGACCATTTCCGAGTT_4	1.94191817140544	0.0793614606125792
AAGCACTGGCCATAACAGGATCTG_4	1.81713316104584	-0.0135801
AGCACTTCCTGACACATGTGGTAC_4	1.81160472290913	0.0390955230209365
CAGTCCAATCCGTATGTGTCCAGA_4	1.4434864196127	-0.0552564
GAAGGAAGGATGCACTAGGATCTG_4	1.89233811753787	-0.0603965
ATCACACGGAATCGTGAAGAGCCA_4	1.49961825326008	-0.0665257
CTTGTCGACGACCATTTCGTGGAT_4	1.95272792779042	-0.112887
GAGACGATTCCGTATGCCATACGT_4	1.76202028078441	0.0371211715299364
ATGCCTGTTCTAACGCAGCAGATG_4	1.89798452384634	-0.0651247
CGTGTGTAATCGGTGTGCGTTCTA_4	1.92743321407712	0.0976097718557284
GATTGCTCTCTCTAGGTACACGCT_4	1.80147944442808	0.0275191165295826
CATGGCTATCTCGCAATCGACATC_4	1.2705002969065	-0.0155885
AGAGTAGCAAGGACACTGCCTCTT_4	2.00156319640658	0.214864966233737
ATGCCTGTTGTGCGTTACCTTCTC_4	1.88218297854339	-0.0501897
CAATGTGGGACGAATGCAGGTATC_4	1.53076288232837	0.0950261861803418
CGCATGATCTAGGTGAATTCTGGC_4	1.77326549463023	0.0310102565934648
CCTGATTGTCTAACGCTGCGTAGA_4	1.71829316455183	-0.0172341
GCAAGATCTTGGTGAGACAGCAAC_4	1.88452948828345	0.0991612664643328
TTGGACGTGAGATGTCAAGGCTGA_4	1.35294594684708	-0.131511
CTTCGACTCGCTAGTACCTTCCTT_4	1.59790017428875	-0.129794
ACCACGATCTATCGCACGTAGGTT_4	1.83330914644629	0.0228990119546005
AGAACGAGTGCCATTCAGTCAGGA_4	1.76585692813027	0.0985408631347991
AGCGTGTTCTCTACTCCTTCGTTC_4	1.94400941786742	-0.0624655
AGTTCGTCAATGGACGAGGCATAG_4	1.97180767722055	-0.0320549
TCAGGCTTCCGACTATGACAAGAG_4	1.52907102619284	-0.075064
AACTGAGCCTGGAGTAATTCTGGC_4	1.73758236057498	-0.0786016
CACTAGCTCATTGCCTACCTTCTC_4	1.7160903814269	0.083210333796385
GTTACGCATGCAGGTATTACGGCT_4	1.60985328024223	0.0315503366220112
CGTTGCAACTTGCTGTCACTGACA_4	1.91400397503447	-0.0479204
GATCGAGTCGTCAATGCCTTCCTT_4	1.62508707300035	-0.0711553
GCACAACTAAGGACACTTGACAGG_4	1.86824931380262	-0.123622
ACGGAACAAATGCCTCCAAGTGCA_4	1.68944950129042	-0.0168722
CCTGATTGGTCTGATCTTGTCGGT_4	1.97971246236625	-0.0386588
AACCGTTCGTAGAGCACTACAGTG_4	1.87108281473846	-0.161349
ATCGATCGACTCGTTGCTTCGTTC_4	1.8013595712246	0.0851151501880104
GCTATCCTGAGGACTTACCGCATA_4	1.88760865932425	0.0463234140199909
GTTGACCTAATGGACGTATCAGCG_4	1.73685151501958	-0.063902
GAAGTTGGGTCTCCTTCCATACGT_4	1.88816077222614	-0.0475242
GTGAAGTGATCGGTGTCTTCACCA_4	2.08426014847704	0.0128820839983948
ACAGCTCATCTAACGCGCACGTAA_4	1.77288808121169	0.086736069528145
GTCATCGAAAGGACACGCACGTAA_4	1.91042356593829	-0.109503
ATGCCTGTTTACCGAGTCCGAGTT_4	1.72995595658397	0.0964267562273115
AGCACTTCAGGTTCGAACTGTGTC_4	1.84084995089172	0.0496399743486857
CACTAGCTTCGAAGGTACCTTCTC_4	1.93164123214802	0.029560067683698
GCAAGATCCGAGACTAGCATACAG_4	1.84916209455254	0.0580072716514363
GTAGGAGTTGAGGTGTATTCTGGC_4	1.92471272756476	0.00634579792661816
ACTCTCGAAGTGCAGTAGCAGATG_4	1.5477898352232	0.0676292946352565
TACGCCTTTCCGTATGTCTCCGAT_4	2.05796271273181	-0.0587056
AACCGTTCGTCGGTAACCAGTGTT_4	1.69642625748137	-0.0318374
ACCACGATGATGCACTACGGTCTT_4	1.84050724360864	-0.0222955
CAATGTGGCTTACAGCAAGGCTGA_4	2.21815729733068	-0.00799939
TGGTACAGGTCTGATCCATGGAAC_4	1.82523767510805	0.0719113280881534
ACAGCTCACATTCGGTAACGGTCA_4	1.72382004915586	-0.0175102
GTGAAGTGTGATCGGACATCTACG_4	1.73226136299231	0.0346152988600993
AGCACTTCAGGAGGAACTAACTCG_4	1.96042759918239	0.0381787765187785
CGGTTGTTCCTACTGATAGCCGAA_4	1.72190126064985	-0.0226646
CGGTTGTTAATGCCTCTCACGTTC_4	1.40114647103119	0.0465910111354971
TCGCTGTTCTTGCTGTTCTCCGAT_4	1.56514861451238	-0.0546226
ATGCACGAGTATGCTGGCAATTCG_4	1.90488140110473	0.0299162769917342
GAGACGATGATAGCGAACCTTCTC_4	1.79807214637377	-0.16834
TACGCCTTCATTGCCTCTCAGCTA_4	1.57661932100035	0.188577255013154
TTCCAAGGGACTATGCAAGAGCCA_4	1.88527235783533	-0.164532
ACTCCATCCTCATTGCGATTGGAG_4	1.90712168692834	-0.0371207
CAACACCTCATTGCCTTAGGATGC_4	1.87467620551428	-0.0529802
TACGCCTTTTACCGAGAACTGGTG_4	1.88446033769112	0.179375230902119
ACCACGATCGATAGAGGCCAGTAT_4	1.82430985058094	0.0958501816788027
ACAGCTCAAGTCGACACACTGACA_4	2.02106910261363	-0.0165554
ACTGAGGTGTCTGATCGCTTCGAA_4	1.65932433116777	-0.0667464
CATGGCTACTAGGTGATGCGTAGA_4	1.72335759039878	-0.00925894
TGCTTCCATCTCGCAACACTGACA_4	1.31083918560191	0.00738282549665698
CAACACCTCTCATTGCTGCACCAA_4	1.86999112241272	0.0245121731061345
GTGAAGTGGAACGCTTATTCTGGC_4	1.55243328625963	0.0659372025080963
TGGTAGCTACTCGTTGACGGTCTT_4	2.11686997893398	-0.0199215
AGAGTAGCTGCCATTCTGCACCAA_4	1.79370316185219	-0.16755
ATGCACGAGACGAATGCATAACGG_4	1.8374902595931	0.0379839534225911
TTGCGAAGTGATCGGAGCAATTCG_4	2.04477139678604	0.0902996983453435
ATCCAGAGAGTCGACACGATGCTT_4	1.38781194978221	0.0216929995834471
CAATGTGGCTCAGAGTTGTCCAGA_4	1.91645598363376	-0.0246181
AACTGAGCTGATCGGACAAGTGCA_4	2.02035622866559	-0.151806
ACTCTCGATCGAACCAAGTCAGGA_4	1.31815937405511	0.038199034395722
CGGTTGTTCGATAGAGTGCACCAA_4	1.68834561084496	-0.00136759
CGGTTGTTTGGAGTTGTTGACAGG_4	1.33383146334811	0.0736635323097828
GATTGCTCCTCAGAGTCGTGTACT_4	1.75451832671351	0.0295196852329239
GAGACGATCTTACAGCAAGAGCCA_4	1.7672282058345	-0.0758063
ACGACTTGTTACCGAGACCTTCTC_4	1.80484672973463	-0.0738342
GAACATCGAGTGCAGTCGAGTATG_4	2.05927898017562	-0.0144583
TGGTACAGTCCGTATGCATAACGG_4	1.80015918540489	-0.112356
TTGCGAAGGCCTTGTTTGCACCAA_4	1.81795029868063	-0.0614875
CCTTGATCTCGAACCACGATGCTT_4	1.77783748476262	-0.0537927
TTGGACGTCTTACAGCACCGCATA_4	1.95122208770348	0.0819256619858356
GATCGAGTAGAAGCGTCGTAGGTT_4	1.72739880363528	-0.122555
ACTCTCGACAGAATCGCAGTCTTC_4	1.63848619165871	0.0354774065952921
ATGCACGATACATCGGTTGTCGGT_4	1.93064814386124	-0.0490371
TCGCTGTTCTTGCTGTCTGGTTCT_4	1.95979066488732	-0.0268719
CGGTTGTTATCGGTGTGTCTAGGT_4	1.9579443354437	-0.0222659
GAAGTTGGATTCGAGGTATCAGCG_4	1.64860870073987	-0.125741
GATAGGCTCTAGGTGATGTGGTAC_4	1.71797551305705	-0.0712135
ATGCACGAAGTGCAGTTCTGCTCT_4	1.90510444643962	-0.0661706
TTCCAAGGGAAGAGGTCAAGCAGT_4	1.89168101378036	0.0784174957384949
TACGCCTTCGAGACTAACCTTCTC_4	1.70024768682403	-0.102039
CCTTGTAGTGTGAAGCTCGAGTGA_4	1.79215607261535	0.0516186033571299
ATCCGGTACCGACTATCATCTACG_4	1.73892436466896	-0.0782168
CCTTGTAGGACTTAGGTGCACCAA_4	1.87797642724147	0.0382662603586683
CTTAGGACTGATCGGATTAGGTCG_4	1.55288497585828	0.0797028459996502
GAAGGAAGGCCTTGTTAACCGAAG_4	2.01879566367935	-0.0428172
ACCACGATGTATGCTGACCGCATA_4	1.67304665878635	-0.11683
GTTGTTCGACCAGCTTAACCTTGG_4	1.64127823952731	-0.0339465
ACAGCTCATGCAGGTACACTGACA_4	1.94535388507192	0.0305153466419237
ATGCACGACTCTACTCAACCTCCT_4	1.43176903905632	0.0397506349938722
ATGCACGAACCAATGCTTACGGCT_4	1.53223968710086	-0.069428
GCAAGATCGTAGAGCACAAGCAGT_4	1.8433372402508	0.0472582666925469
ATGCCTGTTGATCGGACGTAGGTT_4	1.67025154088938	-0.07359
GCGTCATTTTGATCCGACGGTCTT_4	1.78943610978817	0.107286076958186
GTGCCATACTGACACATAGCCGAA_4	1.92149709096441	-0.02432
TGGTACAGCCTACTGATTACGGCT_4	1.67958332824275	0.106019504660753
ACTGAGGTCGGATTGATTCAGCCT_4	1.93903772102332	0.0303867455097276
TGAGCTAGAAGGACACCCTTCCTT_4	1.86413885346277	0.0251238989240246
CGCATGATCGTTATGCTAGCCGAA_4	1.60469520443918	0.0199661063079261
TGCTTCCAGATACTGGCTAACTCG_4	1.39794381160544	-0.0854866
ACCACGATATTCGAGGGCGTTCTA_4	1.86696287710477	-0.0218842
GAGCAGTAATGGTTGCTCAGACGA_4	1.99154002365916	0.0791975374220966
ATCGATCGTGGAGAGTTCGTGGAT_4	1.33672193138747	0.0169351115413588
GTTCTCGTCATTGCCTGCTTCGAA_4	1.80281966645981	-0.0213408
TGCTTCCACAACCTAGTGTCCAGA_4	1.80606334823171	0.0218057416144495
TGGACTCTGCCTTGTTGCTTAGCT_4	1.39920328501757	0.221648055792938
GAGCAGTATCCGTATGACGTCGTA_4	1.49824228534391	-0.169224
GTGAAGTGGATGCACTCAGGTATC_4	1.96778154248106	-0.155709
ACTCCATCACGTGATGGTATTGGC_4	1.8180020934021	-0.0106626
CAACACCTCCAAGTTGAAGGCTGA_4	1.48428515132778	0.0742476084922597
CAGTCCAAGAGGACTTTGTGGTAC_4	1.86722469837892	0.0570107452208863
CGTGTGTACAACCTAGTAGGATGC_4	1.74334804714651	0.0260030711255207
CTGATCGTATTCGAGGGCGTTCTA_4	1.7362332087568	0.0426034034581336
ATATGCGCCGACCATTCTGCGTAT_4	1.8838522879732	-0.0655468
GATCGAGTCGACCATTAGGATGGT_4	2.0031645331417	-0.0664742
TCAGGCTTTCTAACGCACCATGTG_4	1.47954953846733	0.0840099408050392
CGCATGATGAAGAGGTGCACGTAA_4	1.81997721547832	-0.102117
CATGGCTATCTAACGCCTGGTTCT_4	1.62656351011192	-0.0300842
CCTTGATCCTTGCTGTTACACGCT_4	1.68715191969191	-0.174015
CGCATGATAGTCGACACAAGTGCA_4	1.74995591217593	0.0637614929529292
TACGCCTTTTGGTGAGAACCTCCT_4	1.70544403688025	0.055623980682232
AGAGTAGCATTCGAGGAACTGGTG_4	1.77945691193612	-0.0316489
CGTTGCAACTCAGAGTGCTTAGCT_4	2.04185345114371	-0.0319558
GATTGCTCTACCAGGAGTTCATGG_4	1.58644037688543	-0.063205
CTTAGGACTTGGTGAGTCAGACGA_4	1.99373836071754	-0.0178261
AACTGAGCTGTGCGTTTCGTAGTC_4	1.81994476032309	-0.0744668
GAAGTTGGGTCAGTTGAACGGTCA_4	1.82485256434193	0.188746092328373
GATTGCTCCTCAGAGTCTAACTCG_4	1.92820668446505	0.0555675827466929
GTGCCATAGAACGCTTGCTTAGCT_4	1.99643777249817	0.0233929166836042
ACTCCATCGAGGACTTCTACAGTG_4	1.54378909944451	0.171599478323828
GCTATCCTTCTAACGCTCTGCTCT_4	1.89233634515384	-0.10641
TGGACTCTAATGCCTCTCTGCTCT_4	1.92598366638787	0.0747958300705445
GTTGTTCGTTACCGAGTCCGAGTT_4	1.86055039957433	-0.0983807
CTGATCGTCAATCGACCGAACTGT_4	1.73457684387105	-0.0758973
TTCCAAGGAGGTTCGACCAGTGTT_4	1.9838700292489	-0.0652309
ATATGCGCCTATCGCACAAGCAGT_4	1.9695780216632	-0.0185157
TATCGGTCTCGAAGGTCGTGTACT_4	1.85101841165762	0.00568944736030291
CGTGTGTAACCAATGCAACTGGTG_4	1.79211408206244	0.0303543253944674
TTGCAGACCTATCGCATTCTCTCG_4	1.94358028502925	-0.0185116
TGTGACTGGTCTCCTTCAGCGATT_4	1.89250149347971	0.0809141012956445
CAGTCCAAGTCGGTAATCGAGTGA_4	1.69233482200199	-0.0700306
GAACATCGGTCTCCTTTAGCCGAA_4	1.79054776890608	0.0235155891067776
GTTGACCTTCTAACGCCAAGGTCT_4	1.5638038534496	0.0427902429901556
ACAGCTCATGATCGGAGACAAGAG_4	1.8862282286481	-0.151903
AGTTCGTCCAACCTAGTTAGGTCG_4	1.64075675654183	0.0472036239704733
ATCGATCGAGTCTGTGTTACGGCT_4	1.62378282320577	0.00553145586877393
ATCGATCGATCGGTGTAACCGAAG_4	1.87294611674247	0.0322610959866131
CATGGCTACTGGAGTAGCGTTCTA_4	1.85979455166482	-0.0370788
ACCACGATATTCGAGGTTACGGCT_4	1.95973987113102	-0.0732791
ACCACGATTCCGTATGGCTTCGAA_4	1.91870731392878	-0.107448
TTGGACGTGAAGAGGTTGCGTAGA_4	2.1007124730009	-0.0609574
ACTCTCGATTGGTCTCCTGCGTAT_4	1.49079093351627	0.0221979229740907
GTCGAAGACCTACTGACAAGTGCA_4	1.68478357535642	0.0809111986043529
CTTAGGACCTGACACAGCCAGTAT_4	1.60312813126043	-0.0575026
GAGACGATGAGATACGTTCTCTCG_4	2.19077074322208	0.0466684232515227
AACTGAGCGAACGCTTGTCTAGGT_4	1.91113572757277	0.079430921525395
ACGTTCAGCGGATTGAAGGTCACT_4	1.99239953846066	-0.0779638
CCGTAAGATTGGTCTCTACACGCT_4	1.69058143307273	0.0132087963653767
CGGCTAATTGAGGTGTCAGTCTTC_4	1.28671931468802	-0.0528832
GCAAGATCCTCTACTCGCACGTAA_4	1.59785000413757	-0.173892
ATGCACGAGCTCTGTACTCAGCTA_4	1.93877290914981	-0.117553
CCTTGATCGTCGGTAATCGAGTGA_4	1.79463717417488	-0.0261113
CTGATCGTTGCCATTCTGGTCCTT_4	2.0823212896103	-0.116153
TACGCTACGACTTAGGCCAGTGTT_4	1.91263944212297	0.14163834569939
TTCCAAGGAGAAGCGTTCGTAGTC_4	1.67736198157224	-0.0422609
GATGTGTGGATGCACTTGGTCCTT_4	1.50197793100362	0.152785015345975
AACTGAGCTGGAGAGTTGCCTCTT_4	1.48512982107648	0.139503679311554
TACGCTACATTCGAGGACAGCAAC_4	1.92646716707832	0.017548223911398
TGAAGACGACGATGACTATCAGCG_4	1.95766601234002	-0.0209191
ATCGATCGGAACGCTTCGTGTACT_4	1.91433023283801	0.000543703716463895
CGACGTTAAGGTTCGATCCGAGTT_4	1.86486035461868	-0.112022
GTGCCATAGAATCGTGACAGCAAC_4	1.82071285301649	0.0919899958936198
GTTGTTCGGTCTCCTTGTTCATGG_4	1.8867466942363	0.0430398100980206
TGGTACAGGACTATGCTGTGGTAC_4	1.64767911223267	0.0272143419163662
CGGTTGTTTTACCGAGTTGACAGG_4	1.77474636455413	-0.0767097
CTTGTCGAGAGGACTTTCGACATC_4	1.83042689508477	0.0662903153224918
GACGATCTTGGAGTTGTCGTAGTC_4	1.82413316618647	-0.131979
CGCTCTATTACATCGGCACCACTA_4	1.66907315031218	-0.0253092
CGACGTTACTTGCTGTTGTGGTAC_4	1.69869999711629	0.102228740978618
CAATGTGGCGATAGAGGTTCATGG_4	1.86968208127078	0.0502744436631998
AACCGTTCCTGGAGTAAACCTCCT_4	1.8176546440032	0.122219371668628
AACGTCTGGAAGAGGTTAGGATGC_4	2.1206382943546	-0.0207777
CTGATCGTTTGATCCGCGTGTACT_4	1.79488	-0.0385236
GCGTCATTGTATGCTGTGCCTCTT_4	1.44019502536834	0.13082105794158
GCGTCATTGTCTGATCAACCTCCT_4	1.86932399178284	0.0412657799438408
ATATGCGCGCCTTGTTGACAAGAG_4	1.84583790547316	0.0253979619536885
GTTGACCTCAACCTAGTAGCCGAA_4	1.85472642994077	0.0243318804276832
CAATGTGGACGATGACCCTTCCTT_4	1.98282028054076	-0.063008
CACTAGCTACCAATGCTGCCTCTT_4	1.76639880259413	0.0262895224777247
ATCCAGAGCGATAGAGTAGGATGC_4	1.21163315670596	-0.116923
CGTTGCAAGATACTGGTGCCTCTT_4	1.89838548192906	-0.078897
ATGCCTGTCTCATTGCTCGACATC_4	1.91129328680126	-0.0560387
ATGCACGATGTGAAGCGCACGTAA_4	1.86025474669457	0.105575329518109
CGCTCTATCAACCTAGCTACAGTG_4	1.73398719050972	0.0275491502033462
GAAGGAAGTGGAGAGTGCCAGTAT_4	1.70443328826863	0.0743736114568057
TTCCAAGGACCTAAGGCTCTGGTT_4	1.8939948347663	0.0307440942895003
AGCACTTCAGTCTGTGATGGAAGG_4	1.7704247459267	-0.101531
TACGCTACGTCCTAAGCTGGTTCT_4	1.8151063018245	-0.120232
TGAAGACGAGTGCAGTGTAGCATC_4	1.80733521955911	0.00749215705074605
ACGGAACACGGATTGAATTCTGGC_4	1.84131390824003	-0.0732589
ATCGATCGTTGGTCTCCAGGTATC_4	1.7710718707524	0.00189849260544969
ATGCCTGTGAAGAGGTCATCTACG_4	1.8232387492081	0.0642446588708121
ACCACGATGATACTGGACCATGTG_4	1.85742218431465	0.0255770421055748
CGGCTAATCGATAGAGCAAGGTCT_4	2.03188168587333	0.148448255117226
GATTACCGCGACCATTTCCGAGTT_4	1.8714959157296	-0.0640705
AAGCACTGAGCTCCTACCTTCCTT_4	1.72349895744971	-0.0830845
AGAGTAGCCCTACTGAGATTGGAG_4	1.8320612153877	-0.00790723
ATCACACGCAGTTCTGTCTGAGAG_4	2.10312445055612	0.0176002490224842
ACGTTCAGCTCAGAGTGTGTTCCT_4	1.88603018333324	0.01918241083653
AACTGAGCACCAGCTTAGGCATAG_4	1.54601698833912	-0.0449353
AGTGGATCTACATCGGTACACGCT_4	1.77600334234072	-0.0637461
CCTTGATCGATACTGGCATGGAAC_4	1.92814070730049	0.00659535689514365
GAGCAGTATACGGTTGACATAGGC_4	1.66978458455856	0.0109778196865069
GCTATCCTTCGAAGGTAAGAGCCA_4	1.91192808693694	0.00632942662691371
TGGTACAGAATGCCTCCTGGTTCT_4	1.68954969416354	0.0148992358031739
CATACCACAATGGACGCATCTACG_4	1.67403671821929	-0.036027
GTTGACCTCGGATTGAGCATACAG_4	1.51799771485582	0.000123284465861573
CGCATGATCTATCGCATCGAGTGA_4	1.90552589279687	0.0746230715072709
GTTGACCTTTGGTGAGCATGGAAC_4	1.64287212950418	0.149434584764152
ACGTTCAGAGGTTCGACATGGAAC_4	2.02781124667021	-0.12518
ACGACTTGCAGAATCGGCAATTCG_4	1.8399494732834	0.0360703880520489
AGCGTGTTGAGATGTCACCTTCTC_4	1.92924874089112	-0.0932283
TCAGGCTTTGTGAAGCTTAGGTCG_4	1.66354992892024	-0.0374097
AACCGTTCTGCAGGTAGCCAGTAT_4	1.3553793432638	-0.0973944
GTTGTTCGGAACGCTTCAGCGATT_4	1.82104308696273	-0.0273846
AGAACGAGGTAGAGCAGATCGTAC_4	1.62204589761316	-0.0661577
CATACCACTACCAGGATCTGCTCT_4	1.83990386209716	0.0248548529312091
ACGGAACACTTACAGCTCTGAGAG_4	1.83684103231298	0.118476479560167
AGCACTTCGCCTTGTTACGGTCTT_4	1.68941316153862	0.0486045091666174
CACCTGTTCTCTACTCACTGTGTC_4	1.67880883455962	-0.128955
CGCTCTATACCTAAGGCGATGCTT_4	1.38981643747198	-0.0358742
TTCCAAGGTCGAACCAAAGAGCCA_4	1.26920439880401	0.0509957755004173
ACGGAACAAGCTCCTATATCAGCG_4	1.9161215789772	0.0313473001845188
ATCCGGTAAGCTCCTAAACCTCCT_4	1.79161730572373	0.00544017844701083
GAAGGAAGAGGTTCGATCACGTTC_4	1.9902999172216	-0.163157
TGGTACAGCAACCTAGTGCCTCTT_4	2.02516794453715	-0.0361971
AGAGTAGCTTGGTGAGGCATACAG_4	1.78350620537393	-0.0425636
CTTCGACTGCCATAACTCTCCGAT_4	1.87690538455144	0.0151555392339339
GATCGAGTTGTGAAGCGCTTCGAA_4	1.76824596798085	0.00905573636415669
AAGCACTGCAGAATCGCAAGCAGT_4	1.95884995881607	0.0731658254652136
CCTTGTAGGTATGCTGTCTGCTCT_4	1.67490526945328	0.0261136771491785
ATCCGGTAACCAATGCTGTGGTAC_4	1.62879697624669	0.0151870602649394
ATGCACGACCTACTGAGCTGTTGT_4	1.66393206361805	-0.0885456
CCTGATTGGACGAATGGACAAGAG_4	1.83818825643786	0.0597507452446429
GAAGTTGGAAGGACACTAGCCGAA_4	1.9514106260883	-0.0665521
AGAGTAGCTGGAGTTGCGAACTGT_4	1.83522843401964	0.0173016262571495
ACAGCTCAACATTGCGCACCACTA_4	2.06283276877206	-0.105867
CGGTTGTTTGAGGTGTGATTGGAG_4	1.91683767007392	0.0581724022250396
CTGTTGACCGTTATGCCTACAGTG_4	1.6823361133965	0.00790851258730632
CAATGTGGTCCGTATGACTGTGTC_4	1.82632539435066	-0.055046
ACTCCATCAGCTCCTACTTCGTTC_4	1.99663607533648	0.041588261613105
AGTTCGTCTGATCGGACAGTCTTC_4	1.54775518217498	0.112548683777871
ATCGATCGGTCCTAAGTGCCTCTT_4	1.69024669485543	0.0779573907691534
CGACGTTAGAACGCTTAAGGCTGA_4	1.45178897766255	0.0109200273828046
ATGCCTGTGAAGAGGTGACAAGAG_4	2.04021884185518	-0.0231813
TACGCCTTTGCCATTCCGTAGGTT_4	1.48865400725274	-0.0245699
CGTGTGTACAACCTAGCGTGTACT_4	1.40994034491999	-0.00520799
GTGAAGTGCTGACACATGCACCAA_4	1.78763193888374	0.125861187860796
ATGCCTGTGTCGGTAATTCAGCCT_4	1.62771952509839	-0.000984918
TGCTTCCATGTGCGTTTGTGGTAC_4	1.79901060628158	-0.0781797
CTGATCGTTGTGCGTTGCTGTTGT_4	1.83617046410528	-0.0198118
GATCGAGTCTCAGAGTCTAACTCG_4	1.72452494634814	0.00540164858577055
GAGACGATTTGGTGAGGCACGTAA_4	1.36839890006747	0.103288303541367
GCTATCCTTTCAGGAGAGTCAGGA_4	1.65237079196752	0.0152067441130614
GTGAAGTGGTCGGTAATCACGTTC_4	1.82717516799646	-0.0579919
CACCTGTTCAATCGACCATGGAAC_4	1.90962577882513	0.069851972515641
CGCTCTATGAACGCTTCAGTCTTC_4	1.48284205473345	-0.0476243
CCTGATTGTGCCATTCCTTCACCA_4	1.13977624155195	0.00426939200764778
GTGAAGTGAGCTCCTAGCTGTTGT_4	1.85266096565521	0.101447009591003
GATAGGCTCTCAGAGTGCTTAGCT_4	2.10703634837067	-0.109236
AGTTCGTCGAACGCTTCTCTGGTT_4	1.55659932342305	0.139200330457451
AACCGTTCACGTGATGCGGAATAC_4	1.77740781565674	-0.0557885
GAGCAGTAAGGCTTCTTCTGAGAG_4	1.96788809248825	0.0370063152321012
GTGAAGTGGTCAGTTGAGCAGATG_4	1.37290351553391	0.106963422055716
TGGTACAGGACTTAGGGTTCATGG_4	2.00591647243222	0.0340445765992574
ACTCTCGATAAGTGGCACGTCGTA_4	1.25118718279175	0.034364594731579
GAGACGATTGTGCGTTTCACGTTC_4	1.78835378645747	0.0686801415847113
CGCATGATCTATCGCATCTCCGAT_4	1.91616691570126	-0.132719
CATACCACTCTAACGCTCTGAGAG_4	1.95922370286035	0.0133393378234159
GTCGAAGACTATCGCACGAGTATG_4	1.75729429922155	-0.0308722
CATGGCTAATGGTTGCTCCGAGTT_4	1.66280853337146	-0.0675662
GTTGTTCGCTAGGCATTCAGACGA_4	1.92783662103208	-0.120551
CGGTTGTTTACCAGGAGCTTCTTG_4	1.44143776284248	0.0897482282297535
TATCGGTCGAGATACGGCACGTAA_4	1.88961	0.0679263931769945
GTTCTCGTCCGACTATGTAGCATC_4	1.43591241562766	-0.00633771
ATCGCCATCGATAGAGACCTTCTC_4	2.0492918185635	-0.0755646
GTTCTCGTAATGGACGAGGCATAG_4	1.92858764168011	-0.0032613
GTTACGCACCGACTATTCTCCGAT_4	1.86621942888784	-0.000840998
CAATGTGGCAATCGACCAGGTATC_4	1.80294376520612	-0.111785
TAACCGGTGTCAGTTGTCAGACGA_4	1.70086641775678	-0.175512
GATTGCTCCCAAGTTGACAGCAAC_4	1.70218250238505	-0.0933029
TCAGGCTTAGGTTCGAGTTCATGG_4	1.83076035912865	-0.0478835
CCTTGATCTAGTTGCGCCAGTGTT_4	1.82792622969792	0.0230521891830113
GTTGTTCGTACCAGGATCGTGGAT_4	1.95772409007302	-0.0934159
GAACATCGCTAGGTGAAGCAGATG_4	2.0087148798584	-0.0113374
TGCTTCCACTGACACATCTGCTCT_4	1.17968479888801	0.0298968084464897
CCTTGTAGACCAATGCCGGAATAC_4	1.85173566585646	-0.0297697
AACTGAGCGACTTAGGCAAGTGCA_4	1.91954114835562	0.0457366696587325
ACTCTCGACTGACACATGCCTCTT_4	1.21562873634331	0.0286732747899437
TGAAGACGGTCCTAAGGACAAGAG_4	2.06208342013777	-0.121479
TCAGGCTTCGAGACTATTCAGCCT_4	1.97041058887554	-0.04214
TTCCAAGGTCTCTAGGCATAACGG_4	1.36442569754426	-0.0576347
ATCCAGAGACCTAAGGCTCTGGTT_4	2.04739692092301	0.0466185872272244
ACTCCATCCGAGACTATCTGCTCT_4	1.80664072206721	-0.134797
CGTTGCAAGCCATAACACAGCAAC_4	2.03763815421353	0.135745866087698
AAGCACTGCTCAGAGTTCTCCGAT_4	2.0882552580389	-0.0189498
TGGTACAGCATTCGGTCGAACTGT_4	1.83606611384485	0.0483547560437464
GAATCCGACTTACAGCGCTTAGCT_4	1.94203024753242	0.089548919555347
TATCGGTCCTTACAGCACGTCGTA_4	1.92675980471768	0.119312210164861
CAATGTGGACCAATGCCACCACTA_4	1.74643067229272	-0.0361608
CGTTGCAAGACGAATGGTAGCATC_4	1.63800352234739	-0.118996
TACGCCTTTCTCTAGGAAGGCTGA_4	1.88267049735918	-0.00802486
GTTGACCTCGTTATGCACTGTGTC_4	2.12020879858165	0.00561859541582407
CTTCGACTATCGGTGTTGCCTCTT_4	1.55833077975411	0.142721174841656
GACGATCTACATTGCGTTAGGTCG_4	1.86299040396301	0.0186624970487994
ATGCACGAGAATCGTGTGTGGTAC_4	1.78858568820606	0.165436191539261
CCTTGTAGAGGAGGAATCGTAGTC_4	1.93625682631354	-0.0783617
GTTACGCATCGAACCACACTGACA_4	1.96188178924067	0.0152293127164901
CGGCTAATAGGAGGAACCAGTGTT_4	1.94029734570921	0.0278986647843025
ATGACGTCTCCGTATGTTAGGTCG_4	1.45969424862964	-0.156357
ACTGAGGTAATGGACGCAAGGTCT_4	2.02177641450226	0.0446570952264689
CTTCGACTTAGTTGCGTAGCCGAA_4	1.76065670286938	0.088773884636231
TGGACTCTTGAGGTGTAGCAGATG_4	1.41156894268385	0.0734705810525811
ATCCGGTAGTCTGATCACCTTCTC_4	1.80128213187585	0.0461949103070964
GAACATCGGAAGAGGTTGGTCCTT_4	1.88595155021214	-0.0192609
ACTAGGAGGTCCTAAGTAGGATGC_4	2.0726808725712	-0.0337699
GAAGTTGGAGGTTCGACAGGTATC_4	2.02622642608314	-0.0858367
CTGTTGACGTCTGATCCTGGTTCT_4	1.6241119987557	0.0643205333887984
GTGAAGTGGAATCGTGCGTGTACT_4	2.17245596234262	-0.119544
TATCGGTCGATAGCGACCTTCCTT_4	1.70599958954964	-0.0832847
AGTTCGTCCTAGGCATTTGTCGGT_4	1.40049141389777	-0.00540764
CGCATGATGATGCACTGCTGTTGT_4	1.86646229487097	0.0232442527051849
CTGATCGTTCGAACCATTAGGTCG_4	1.47420671869759	0.090009864287344
CGGCTAATTTACCGAGAGTCAGGA_4	1.9034305293815	-0.0237402
AGAACGAGGTAGAGCATTCTCTCG_4	1.92176422486161	0.00398642942689559
ACAGCTCATGTGCGTTCTCTGGTT_4	1.78207883689191	0.126523846345273
CGCAATCTTTGGTGAGCATGGAAC_4	1.95266332366326	-0.060784
ATCGATCGAATGGACGCTCTGGTT_4	1.89504041001193	-0.169696
CCTGATTGGTCTCCTTGTCTAGGT_4	1.69554234120428	0.104885255296313
ATATGCGCTACGGTTGTCAGACGA_4	1.7192610032718	0.239814311057905
AGAACGAGAAGGACACTCTGCTCT_4	1.87637381982134	-0.0699549
CATGGCTAAGGAGGAAGCTTCTTG_4	1.82311427166106	0.0817879947625493
CGGTTGTTCTAGGTGAAGGCATAG_4	1.47690421925945	-0.058527
TCGCTGTTAAGGACACTAGGATGC_4	1.81486998565598	0.252275742175089
AGAACGAGGCCTTGTTAACCGAAG_4	1.85291605752194	0.0879189906674836
CAACACCTTCGAAGGTGTTCATGG_4	1.68024610556119	0.177789654891128
ATGCACGAGCCTTGTTTAGCCGAA_4	1.73347734547081	-0.086266
CCTTGATCTCCGTATGGCTTCTTG_4	1.81275186268437	-0.0888191
GTTACGCAGCCATAACCTTCACCA_4	1.87805679229154	-0.179944
CCTTGATCTAAGTGGCCTTCACCA_4	1.9503612314454	0.0584911945629402
TTCCAAGGAGAAGCGTACGTCGTA_4	2.14084321976754	-0.0887254
ACTCCATCCGAGACTAGATCGTAC_4	1.73472846954712	-0.0564557
GTTCTCGTTGCAGGTACATCTACG_4	1.78670104567425	0.02844249868878
ACAGCTCAAGAAGCGTCTCAGCTA_4	1.82966252092887	-0.0955857
TATCGGTCCTCTACTCCACTGACA_4	1.64233706967592	0.11060886300762
TGTGACTGGAATCGTGATTCTGGC_4	1.59684766689466	-0.0151387
CGCTCTATATCGGTGTCAGGTATC_4	1.84138243612835	0.0410788270197624
ATCGATCGCGTCAATGCGTGTACT_4	1.8928116378386	0.0461438916826979
GAGCAGTAGACGAATGAACTGGTG_4	1.96938138040393	0.141479026555901
GAAGTTGGCGCTAGTAAGGTCACT_4	1.83977447464857	-0.0202528
TTCGTTGGACCTAAGGTTGTCGGT_4	1.7472015949015	0.0927112174228484
GATCGAGTGACGAATGCGAGTATG_4	2.11916918593436	-0.058781
TGGCATGTGATGCACTACATAGGC_4	1.91980512164762	0.000528592554080526
CATGGCTATTGGTCTCCACTGACA_4	1.57049565064741	-0.011268
ATGCACGAAATGCCTCGCTTCTTG_4	1.86748793612096	-0.0524453
ACAGCTCAAGTCGACACCAGTGTT_4	1.93687495052244	-0.0337741
CTTGTCGATGAGGTGTCCTTCCTT_4	2.05332115380813	-0.121588
CAACACCTTGTGAAGCTACACGCT_4	1.89407398371575	-0.0501753
TGCTTCCAGCTCTGTACATGGAAC_4	1.55193527641912	-0.027819
CGCTCTATATTCGAGGAGGTCACT_4	1.71916286638616	-0.0344819
GATTACCGCGATAGAGTAGCCGAA_4	2.13873580167534	0.0245932168080094
GATTGCTCGAGGACTTTCTCCGAT_4	1.84654474356257	-0.0488596
CATGGCTATGTGCGTTTGCCTCTT_4	1.71698180415941	0.131654656138193
CCGTAAGACATTCGGTCGATGCTT_4	1.9456223259632	-0.116787
GTCGAAGATGCAGGTATCGACATC_4	1.79562981999771	0.0434207068379943
GTGAAGTGCCGACTATAACCGAAG_4	1.76010111194772	-0.0395454
CGGTTGTTCTAGGCATTCGACATC_4	1.94109916821909	-0.019546
AGAGTAGCAGGTTCGATGTGGTAC_4	1.85422	0.16664319076479
GTCGAAGACTAGGCATTCTGAGAG_4	1.80445525794647	-0.00848299
GCACAACTTCTAACGCCACTGACA_4	2.12249397502903	-0.068868
GTCATCGACAACCTAGCAGCGATT_4	1.68228447397911	0.0207624930976114
AACGTCTGGACTTAGGGTGTTCCT_4	2.02074580015512	-0.138154
GTTGTTCGCGCTAGTACAGCGATT_4	1.68323887517323	-0.049703
GATTGCTCACCAATGCGACAAGAG_4	1.52491041270146	-0.0296036
ATGCACGAATGGTTGCCCAGTGTT_4	1.32605	0.00436839778011452
CGCATGATCTAGGCATTCGACATC_4	1.92191880830276	-0.00477129
GATAGGCTAGAAGCGTCTCTGGTT_4	1.93411875251513	-0.0316269
CATACCACGTCGGTAACATCTACG_4	1.92187289649428	0.106166794367015
CCTGATTGGTATGCTGTACACGCT_4	1.44655990497127	-0.0205147
TGGACTCTGAGATACGCAGGTATC_4	2.04971307366229	-0.0875339
AGTGGATCCTTGCTGTCAAGGTCT_4	1.99171475090473	-0.130864
CGGTTGTTCAGTTCTGACTGTGTC_4	1.7407117082941	0.0730524604204676
TACGCTACTGGAGAGTTTCAGCCT_4	1.93969352014652	-0.03111
TGGTAGCTGTCAGTTGTCGAGTGA_4	1.08384051964795	-0.023207
GTTACGCACGGATTGAGACAAGAG_4	1.98937816660147	-0.0650317
TGGTAGCTCGATAGAGTGTCCAGA_4	1.83596789968852	0.0365925519727922
CGGCTAATCGTCAATGTCGAGTGA_4	2.03087332959323	-0.0552029
GTCATCGAGTCTCCTTTTAGGTCG_4	1.79329959334636	-0.132813
CATACCACACTCGTTGTGGTCCTT_4	1.99241469814164	0.0760864953204747
ATGCACGACATTGCCTTTCTCTCG_4	1.69550739273436	0.0982392428033304
GTTACGCACGTTATGCCGTAGGTT_4	1.96347161407479	-0.0591262
ATCCGGTACTTACAGCCTAACTCG_4	2.01345565139415	-0.0809839
ATCGATCGTGCAGGTATATCAGCG_4	1.89471612943722	0.0833470992594804
GAACATCGTACGGTTGTCTGAGAG_4	2.07194715593751	-0.136354
ATCCGGTAGTAGAGCATTGACAGG_4	1.58725202129213	-0.0988625
GTTCTCGTTTGGTCTCTCACGTTC_4	1.43316644406528	0.115603636883209
CCTGATTGCATTGCCTCTACAGTG_4	1.65153071799137	0.042235178325236
CAATGTGGACGATGACGCGTTCTA_4	1.84034960491987	-0.102032
TTCCAAGGTGGAGAGTGACAAGAG_4	1.89141259701609	-0.126126
AAGCACTGTGGAGTTGCCAGTGTT_4	1.82433586602875	0.0087703032874463
TCAGGCTTTCGAACCAACATAGGC_4	1.60766705993193	0.012530159762185
GAGCAGTATGTGAAGCATGGAAGG_4	1.8081981648587	-0.069338
CGGCTAATCACAAGTCCTACAGTG_4	1.93003966594347	0.00462814225882555
CATGGCTAATTCGAGGCTAACTCG_4	1.7651254218515	-0.0712151
GTCATCGATCGAACCAACAGCAAC_4	1.91688258568629	0.0338003311727675
TGAGCTAGTCTAACGCGATCGTAC_4	1.82836353268999	-0.091412
TCAGGCTTGAGATACGTTGTCGGT_4	1.83950827580818	-0.00727162
ACGTTCAGCCGACTATTCTGAGAG_4	1.98982430368241	-0.0524498
CCTTGATCTTGGTGAGAACGGTCA_4	1.59872835917795	0.0300352693837021
ACGACTTGTCCGTATGCAGGTATC_4	2.06135390089101	-0.0979582
GTGCCATACTCTACTCTCGAGTGA_4	1.82656223989374	0.0341261756483345
CTGATCGTAGCTCCTACCATACGT_4	1.97731850503423	-0.03241
TACGCCTTCTAGGCATCGAACTGT_4	1.8888918842909	0.0429768750546334
CATACCACGCCATAACTTCTCTCG_4	1.90902838299024	0.026869592480213
TTCGTTGGAGTCGACAGCGTTCTA_4	1.77844183899824	-0.0402125
CGCATGATACTCGTTGGTGTTCCT_4	1.91216656300528	0.0224466797272624
GATTACCGCAACCTAGTCGTGGAT_4	1.57721416685217	0.125814911081502
AGAACGAGACCAATGCCAGGTATC_4	1.33451999638882	-0.0110153
CGACGTTATTGGTGAGTCTCCGAT_4	1.94781375683109	0.159964957005017
AACTGAGCTGGAGAGTTCAGACGA_4	1.99354010606787	-0.0900441
TGGTACAGTAGTTGCGCACTGACA_4	1.73939594990279	0.0511712854605247
GAGACGATCTAGGTGACTTCGTTC_4	1.86388	0.0751091593043782
ACTAGGAGCTAGGCATTGTCCAGA_4	2.15426250774889	-0.0632439
TTGCAGACCGTACGAACAGGTATC_4	1.79828664090781	0.0704996935528984
GTCGAAGAGTCTCCTTCTTCGTTC_4	2.01742768431833	-0.0153806
TGAGCTAGCAGTTCTGCTGGTTCT_4	1.12404581087445	0.16555413458604
TGAGCTAGTGGAGTTGTGTCCAGA_4	1.70845693114743	-0.0894773
AAGCACTGCCAAGTTGCAAGGTCT_4	1.83208590947289	-0.106219
AACTGAGCGAACGCTTCATCTACG_4	1.90600932617899	0.00596298644558824
AACTGAGCGCTGGATTCCAGTGTT_4	1.77779041011199	-0.0121976
ATGCACGACTTACAGCCCATACGT_4	1.78235406841206	-0.0116953
CTTAGGACCTCATTGCACCGCATA_4	1.4495090812192	-0.0390887
ACCACGATGCTCTGTACAGGTATC_4	1.49166034490077	0.116320114685943
GAGCAGTATGGAGAGTCATCTACG_4	1.9453631827948	-0.0161091
AGAACGAGACGATGACGATTGGAG_4	1.83368475241803	0.0348736418322837
TGAAGACGTGTGAAGCGACAAGAG_4	1.84085533803247	-0.0556021
GTTGACCTCTAGGTGACCTTCCTT_4	1.35020317987322	0.0178658737824552
ATGCCTGTCTCATTGCCTAACTCG_4	1.69178725069427	0.178164543509389
CGGCTAATCAGTTCTGACAGCAAC_4	1.58367352412212	-0.150836
TTGGACGTCAATCGACAGGCATAG_4	1.88869329391392	-0.0971279
GTTCTCGTCGAGACTACGTGTACT_4	1.64150174049644	0.0495654654867343
CAGTCCAAACGATGACGCCAGTAT_4	1.75040194885692	-0.144472
CAATGTGGGACTATGCCAGCGATT_4	2.01595979866408	-0.00434972
GCAAGATCTTACCGAGTATCAGCG_4	1.60398852099214	0.0575358804969364
GAATCCGATACGGTTGTTACGGCT_4	1.92049053516805	0.0395324556959808
CAACACCTCGTTATGCAGCAGATG_4	1.42654038945456	-0.103728
CGCATGATGTCTCCTTAGGCATAG_4	1.72665602417834	-0.0636598
CTTAGGACCGGATTGATTGTCGGT_4	2.01802736577983	-0.0550045
CATGGCTAGACGAATGCTTCACCA_4	1.75538245682933	-0.106183
TTCCAAGGTCCGTATGTGCGTAGA_4	1.68436473284192	0.0369537720719223
ATCGATCGAGGAGGAACTTCACCA_4	1.83955468756884	-0.0549807
CAGTCCAAACGTGATGGATTGGAG_4	2.09415200195829	-0.0543388
CGCATGATAGAAGCGTTATCAGCG_4	1.72800693478422	-0.0413714
ACTCCATCGAAGAGGTAGGCATAG_4	1.72671502814291	0.021820089677162
ATGCACGAGAGGACTTACTGTGTC_4	0.98111118560064	0.0850285953568418
TACGCTACCATTGCCTTTCTCTCG_4	1.85584967900288	-0.0113264
CGGTTGTTTGCCATTCGCTTCTTG_4	2.05515476539954	0.0233781643370394
ATGCACGATGCAGGTAGCATACAG_4	1.94610575079835	0.0239618627781286
ACGACTTGCCGACTATGATTGGAG_4	1.56625996712253	-0.104368
ATCCGGTATGAGGTGTCAGCGATT_4	2.0095512311628	0.153794981001731
ATATGCGCTGGAGAGTGACAAGAG_4	1.96787927446297	0.0304902956033468
CATGGCTAGTATGCTGTGCACCAA_4	2.21058161234158	0.00792814018553195
AGAACGAGCGGATTGATTGACAGG_4	1.89607193467947	-0.109403
GACGATCTAGTGCAGTTTCTCTCG_4	1.62938158714566	0.16433763894783
CGCAATCTCTGACACATTAGGTCG_4	1.39965083839686	0.0121127387148712
ATCCAGAGTGTGCGTTCGTGTACT_4	1.54799	0.161947061278667
ATCCGGTATGGAGAGTGCAATTCG_4	1.99140502890371	-0.0209556
CGCAATCTTCTCTAGGTTCAGCCT_4	1.91802919116549	-0.0208523
AGCACTTCCATTGCCTAGGTCACT_4	1.95719485438975	-0.0314407
CGGCTAATCTATCGCATGCCTCTT_4	1.91118994229285	0.200499083818715
AAGCACTGTAGTTGCGACCATGTG_4	1.55505066407981	-0.0156156
CAACACCTAATGCCTCCTTCGTTC_4	1.87014338940848	0.123576779947244
TGTGACTGGAGATGTCTGTCCAGA_4	2.02182244646249	-0.0960964
CTGTTGACTACCAGGAAACCGAAG_4	1.86024039542997	-0.110969
TTCGTTGGCAATCGACACCGCATA_4	1.81784243962882	-0.012786
TGAGCTAGAAGGACACTCTCCGAT_4	1.4221489120834	-0.0453413
ACCACGATTCTCTAGGACTGTGTC_4	1.49792185408396	0.0142249528493443
TATCGGTCTCGAAGGTTGTGGTAC_4	1.87968941380697	0.135135081604993
ATATGCGCTCTAACGCGTAGCATC_4	1.7750380788338	0.105345557971949
CACCTGTTCGTTATGCTGCGTAGA_4	1.68699512223787	-0.0411447
CGGCTAATGAACGCTTCGAACTGT_4	1.94665916845544	0.106951273895585
GACGATCTCTCATTGCCTAACTCG_4	1.68297996434615	0.0151772179128992
GAAGGAAGCAATCGACGTGTTCCT_4	1.99015856054809	-0.084919
CCGTAAGATCCGTATGGATCGTAC_4	1.93254749798878	-0.0591604
CCTGATTGTACGGTTGGCTTCTTG_4	1.97798232669786	-0.0236028
ACGACTTGGTCTCCTTTGCGTAGA_4	1.76332086277159	0.01242023412473
CTGTTGACCTGGAGTACCAGTGTT_4	1.95609092334776	-0.0237884
ACTAGGAGGTCCTAAGAGGATCTG_4	2.15960868287429	-0.0566718
CGACGTTAGTATGCTGAGTCAGGA_4	1.82171918476515	-0.0721941
ACAGCTCATGTGAAGCGAGCTCAA_4	1.83471064729071	0.0388869987391587
GTTGTTCGGTCTCCTTTTGACAGG_4	1.70342710743021	-0.0432923
TACGCCTTGAGATACGCGTAGGTT_4	2.09292682915179	-0.0132259
ATGCACGACGTCAATGAGTACAAG_4	1.47002069166176	-0.0674813
ACGTTCAGGATACTGGGCAATTCG_4	1.57651049126894	0.0949084245106785
CACCTGTTCGTACGAAGCTTAGCT_4	1.96267689655823	-0.0273688
GTTCTCGTTCTCTAGGCGGAATAC_4	1.7242478634027	0.0693276522583076
TTCGTTGGAGAAGCGTCTTCGTTC_4	1.92241935169255	0.0057410203225165
ACCACGATCATTCGGTTCTGAGAG_4	1.89197970390455	0.0244728851348651
CCTTGATCCATTCGGTAGTCAGGA_4	1.55968424195306	0.0885060826892323
TGAAGACGCGTTATGCTTCAGCCT_4	1.81654371112944	-0.121853
AAGCACTGGAGATACGCATAACGG_4	2.00149221254429	-0.0792927
CACCTGTTGTCTGATCGCCAGTAT_4	1.93644502905556	-0.0657815
CTTCGACTCAATCGACTATCAGCG_4	1.81240518441297	-0.0726709
GTTGTTCGGACTTAGGAAGGCTGA_4	1.90133445048945	-0.0646884
TTGGACGTCAGAATCGCTTCGTTC_4	1.54763865283431	0.0771610844104036
ATGACGTCACATTGCGCAGTCTTC_4	1.89442873655019	0.00536654053491378
GCACAACTTCGAACCACGAGTATG_4	1.52661879781893	0.0994431544668525
GTTCTCGTGTCCTAAGGTCTAGGT_4	2.02830151560783	0.0476189023799098
TGGTAGCTACTCGTTGGATTGGAG_4	2.05610944052406	-0.0490424
ACCACGATGAAGAGGTCATGGAAC_4	1.48976421788605	-0.0132662
GCGTCATTAATGGACGCGATGCTT_4	2.05421019096698	0.141773492895979
CTGTTGACGCTGGATTAGGTCACT_4	2.14516517748951	-0.0963157
TGGTACAGGCCTTGTTTGTGGTAC_4	1.98591710083711	-0.0663619
TGGACTCTACGTGATGGCGTTCTA_4	1.9319312105148	-0.00537184
TTGCGAAGCTTGCTGTTCTGAGAG_4	2.00868012650735	-0.0238513
TTCCAAGGGACTATGCACTGTGTC_4	1.98134402005899	0.047673521923573
ACCACGATAGAAGCGTACCTTCTC_4	1.3705405679053	0.178837420980705
CCTTGTAGCTAGGCATAGGCATAG_4	1.9090472881457	-0.112485
GCAAGATCACATTGCGTCTCCGAT_4	1.32999764388611	0.0733693674763636
CGCATGATGTCTCCTTCTTCGTTC_4	1.7983684450791	-0.0418685
CTGTTGACCAGAATCGTCGACATC_4	2.07854521562097	0.0814578983595133
ACGGAACAGCTCTGTATTAGGTCG_4	1.98675838510319	-0.0226908
GATTGCTCGACGAATGGCACGTAA_4	1.94023943373538	-0.0264493
CCGTAAGAAGCTCCTACACCACTA_4	1.94638365443977	-0.0334173
TCGCTGTTTCGAACCAAGTCAGGA_4	2.10024818006282	-0.0387962
CTGATCGTTCCGTATGTATCAGCG_4	1.77253054699671	-0.0230448
CGTGTGTATGGAGTTGAACCGAAG_4	1.65698886693669	0.034113629787459
GTGAAGTGTACATCGGAGGTCACT_4	1.94150861527161	0.0332106508541184
TACGCCTTTTGATCCGATGGAAGG_4	1.88700925140588	0.00638215778046625
CGGTTGTTGCCTTGTTTTGTCGGT_4	1.53901756567035	0.055567388177731
ATGCACGAGTCTCCTTCATCTACG_4	1.84878860159853	0.00514035758750264
ATCGATCGACTCGTTGAGGATGGT_4	1.4975872546747	0.0774715727791625
GTTCTCGTTGTGAAGCTAGGATGC_4	1.84388757194772	0.00384073960469053
GTTGTTCGATCGGTGTTTGACAGG_4	1.73802152898971	-0.0529735
TCAGGCTTATGGTTGCTTACGGCT_4	2.15798593014626	-0.0877267
AACTGAGCGACGAATGGATCGTAC_4	1.95094027552085	0.0895573925112256
AGAGTAGCCAGAATCGGCTGTTGT_4	1.89186037071544	-0.0713438
GTGAAGTGCCTACTGAACGGTCTT_4	1.72858608555466	-0.177599
CAGTCCAACGAGACTAGCCAGTAT_4	1.8835573297668	-0.0702544
CGCAATCTAATGGACGTGTCCAGA_4	2.23349403788241	-0.023137
TGGCATGTTCTCGCAATCTGAGAG_4	2.0415500999991	-0.0343418
TACGCTACCATTCGGTCATGGAAC_4	1.91303035421076	0.0705232566196355
CCTTGATCCCAAGTTGTCGACATC_4	1.86289317900404	0.091014953421487
AACGTCTGCAACCTAGACCATGTG_4	1.91947591077675	-0.0682096
TGAAGACGCGGATTGACTACAGTG_4	1.79341645656013	-0.0657771
CTTCGACTTTACCGAGCTAACTCG_4	1.8336428870994	-0.117252
GATTACCGCTAGGCATGTTCATGG_4	1.74884260148401	-0.0242467
ACTGAGGTCTCATTGCGAGCTCAA_4	1.76266240655138	0.0291834917285334
CGACGTTATCCGTATGTCTCCGAT_4	1.37456064392826	0.0346028929238499
ACTGAGGTCGATAGAGGCGTTCTA_4	1.89491666422963	-0.117304
AGTTCGTCAGGCTTCTCGAACTGT_4	1.87829448023619	0.152002576576814
TACGCTACGTCAGTTGCAAGGTCT_4	1.36455994019579	-0.0248464
ACAGCTCAATTCGAGGGCCAGTAT_4	1.94497540120617	-0.03538
CAATGTGGGCTCTGTAACCGCATA_4	1.51454957684975	-0.135732
CGGTTGTTGTCGGTAAGCATACAG_4	1.7752419202034	0.0108187166743319
CTGTTGACTAAGTGGCGCTTCGAA_4	2.0229461209298	-0.0395924
GATTGCTCCTAGGCATTTGTCGGT_4	2.04402123097509	-0.0113969
CGGCTAATCTCTACTCATGGAAGG_4	2.11752104581066	-0.0786337
AGAGTAGCTGTGAAGCACTGCTAG_4	1.62231204443232	-0.0939739
GAATCCGAGTCCTAAGGCTGTTGT_4	1.82782205618464	-0.0514296
AAGCACTGTCTCGCAAGCACGTAA_4	1.99330690312365	0.00159016382415281
CACTAGCTTGTGAAGCTAGGATGC_4	1.92068623979693	-0.167015
TGTGACTGAGGTTCGATCGACATC_4	2.20673351240781	-0.0531597
ATGACGTCTTGGTGAGTGCACCAA_4	1.71429159102783	0.237450572376207
CTGATCGTTGTGAAGCGACAAGAG_4	1.72036815665488	0.0656981039998685
ACAGCTCACAGTTCTGACAGCAAC_4	1.76447342847323	-0.0329125
ATCCAGAGTCTAACGCTGTGGTAC_4	1.89109904444329	-0.049619
GATGTGTGGCTGGATTAAGAGCCA_4	1.84342248140293	0.0028200805154
CATACCACCACAAGTCCGAGTATG_4	2.0245479403059	0.0425839063928722
CGCAATCTGTAGAGCAACCTTCTC_4	2.06089644472893	-0.120524
ACCACGATCTTGCTGTAAGGCTGA_4	1.79398740369891	0.0154059646355222
ATCGATCGCTGGAGTAAGGATCTG_4	1.50685563046382	-0.0880453
CGGCTAATAGCTCCTAACCGCATA_4	2.02599026024808	-0.041354
ACCACGATGTCCTAAGCGTGTACT_4	1.76485622301042	0.0621849532780337
CCGTAAGATTGGTGAGGTGTTCCT_4	1.94320617895781	0.0668203665991182
CCTTGTAGCTCTACTCCGTAGGTT_4	1.55618030312151	-0.0385853
GTGAAGTGGATGCACTAACGGTCA_4	2.01092512217725	0.0269431052051295
CCTTGATCCGCTAGTAAACCTCCT_4	1.60479220218254	-0.063082
TTGCAGACCAGTTCTGCTTCACCA_4	1.93989	-0.113876
TGAAGACGGCCATAACGAGCTCAA_4	2.05799174577917	0.0640363054071008
TTCGTTGGAGGCTTCTACCTTCTC_4	1.81528223046679	-0.0471597
ACTAGGAGATCGGTGTTCGTGGAT_4	2.08948225996369	-0.0151875
ATGCACGATGGAGAGTTTAGGTCG_4	2.17102435904102	-0.0356659
GAAGGAAGCTGACACAAGCAGATG_4	2.11473639185909	-0.00598046
AGTTCGTCAATGGACGCATGGAAC_4	1.88682287377863	0.11215639143063
ACGGAACAAGAAGCGTGACAAGAG_4	1.75909595381312	-0.00226925
CGCTCTATTGTGCGTTGTGTTCCT_4	1.96797459804946	-0.0616986
CTTGTCGATGCAGGTATAGCCGAA_4	2.17792304213248	-0.0354759
TGGCATGTACCTAAGGCATAACGG_4	2.01744501064353	0.0302449687380086
AGAGTAGCGTATGCTGCCAGTGTT_4	2.02107666152506	0.0855969260481765
GTGAAGTGGTAGAGCACTAACTCG_4	1.75531959388129	0.00319148644702075
GAGCAGTAACCAGCTTAACTGGTG_4	1.94456197224538	-0.0444757
GACGATCTCAGAATCGAGGTCACT_4	1.90958000501396	-0.0402536
CGGCTAATTACATCGGGCTTAGCT_4	1.84055083245838	0.0243780798391592
CGTGTGTAATCGGTGTTTAGGTCG_4	1.74985734516584	0.334627482360328
GTTCTCGTCAGTTCTGAAGGCTGA_4	1.58701981284761	-0.0762068
TGGCATGTAATGGACGGCTTAGCT_4	2.07647703681506	-0.0127804
GTTGTTCGTGCCATTCGCGTTCTA_4	2.04587769903065	-0.104217
GACGATCTTGCCATTCACCGCATA_4	1.65667056894391	-0.0021942
AAGCACTGTTGATCCGTCTGCTCT_4	1.96510483627545	-0.102496
ACTGAGGTTGAGGTGTGCAATTCG_4	1.82030048959304	0.0482124150405235
AACCGTTCGTATGCTGAGCAGATG_4	1.99332171011236	-0.130808
ATCACACGAGCTCCTAACTGCTAG_4	1.98732154501774	0.0745191868049691
GAACATCGGAAGAGGTCCATACGT_4	1.97956841485277	-0.113969
ATGACGTCTGAGGTGTCAGCGATT_4	1.68816948291387	0.0227653269877673
CAACACCTGACGAATGTGGTCCTT_4	1.95121428561771	0.0270905562072244
AGAGTAGCAGAAGCGTTGCACCAA_4	1.81057413198756	0.10820479688487
GTGCCATAGTCGGTAAGCTTCTTG_4	1.86483005969942	-0.0878341
ACTGAGGTAAGGACACGTGTTCCT_4	2.18552305271494	0.044061064754901
TATCGGTCGCCATAACACAGCAAC_4	1.88504981223292	0.0346711191745421
CAATGTGGTGTGCGTTCGAACTGT_4	1.64185823498645	0.0639846969932428
TGCTTCCACTTACAGCCTACAGTG_4	1.59869537131086	-0.00675797
ATCCGGTAATCGGTGTCGGAATAC_4	1.76456401292667	0.0352793182833845
CGTTGCAATAAGTGGCTCTCCGAT_4	1.80735661186865	0.0874947108957339
CACTAGCTAAGGACACTGTCCAGA_4	2.11467018012922	-0.029423
ATGACGTCGACGAATGACCATGTG_4	1.77149514465606	0.0350466735779962
TGGACTCTGAATCGTGCTAACTCG_4	1.73748142179988	-0.055326
ACTCTCGAAGTCTGTGCATCTACG_4	2.07947509166802	0.1183839055835
GAACATCGTACGGTTGCGATGCTT_4	1.85097996593096	-0.0140116
ATCGATCGAGTGCAGTTAGGATGC_4	1.72026340980857	-0.0769022
GAAGTTGGTTGGTCTCCAGCGATT_4	1.60689226956238	0.0192509822172393
ATGACGTCGTCCTAAGACGTCGTA_4	1.53268724273978	0.0608071126580874
GATGTGTGTGCCATTCTGCGTAGA_4	1.88162724392613	-0.112094
ATCACACGCAGAATCGCTCAGCTA_4	1.6194520703407	-0.0374951
GTTGACCTTACGGTTGACCATGTG_4	1.92423053043013	-0.106545
GTGAAGTGTACCAGGATCGTGGAT_4	1.5673500034733	-0.0828994
CAATGTGGCTGGAGTAGATCGTAC_4	1.76595262042133	-0.0595097
AGTGGATCTGCCATTCCAGGTATC_4	2.06818445781276	-0.0234143
CAACACCTAGTGCAGTGTATTGGC_4	1.88180588941809	-0.0621546
GTGAAGTGATGGTTGCTGTCCAGA_4	1.7551930089672	0.0136261478102465
AGCGTGTTAATGGACGACGGTCTT_4	2.02389485139746	0.0955444774441093
TTGCGAAGAGAAGCGTAGGATGGT_4	2.08053770911685	-0.0538197
GTCGAAGAGACTTAGGACGTCGTA_4	2.08134832945031	0.0158039261504992
ATCGATCGGTATGCTGCAGCGATT_4	1.80362083563281	-0.0152355
GAGCAGTACGTTATGCGCATACAG_4	1.99426986347672	-0.0447064
CAACACCTCATTCGGTTCAGACGA_4	1.91675357652443	-0.030145
CACTAGCTAGAAGCGTTAGCCGAA_4	2.01299950994187	0.0573754439670398
TGGCATGTGATGCACTAGGCATAG_4	2.02916452134139	-0.096398
GTTGACCTACCAATGCTGGTCCTT_4	2.18369427343133	-0.119214
GACGATCTATTCGAGGTATCAGCG_4	1.69534201102459	-0.0575127
ATCCAGAGCGAGACTACGATGCTT_4	1.83189095775999	-0.0771139
ATGCACGAACGATGACAACTGGTG_4	1.93864162024752	0.103444582010405
TACGCCTTTGATCGGACCTTCCTT_4	1.62946184749617	-0.030581
GTTCTCGTCGGATTGAAACGGTCA_4	1.49827866720408	-0.0609726
CACTAGCTAGGCTTCTGCTTCGAA_4	2.2175065729054	0.00985784214349497
GATCGAGTGCCATAACAGCAGATG_4	2.03009271598361	-0.0142344
TGTGACTGCGCTAGTACCATACGT_4	2.10308516904322	-0.0251179
TTGCAGACTCTCGCAAACAGCAAC_4	1.9725965540754	0.00275853396117284
ACGTTCAGCGGATTGAACTGTGTC_4	1.66124473384423	0.142647407540857
GTTGACCTACGTGATGACTGTGTC_4	1.40746457000561	-0.0840597
GTTACGCAATGGTTGCGTATTGGC_4	2.06482857943381	0.00731326917629643
AGTGGATCAATGGACGTCGTGGAT_4	1.89426973236454	-0.113087
TGAGCTAGGATAGCGAAGGATCTG_4	1.94779711634337	-0.102147
TGCTTCCAGTATGCTGCAGTCTTC_4	1.51217404309305	-0.0145211
ACGGAACATCTCGCAAACCGCATA_4	1.81227886155068	-0.139946
GATTACCGTAGTTGCGACTGCTAG_4	2.1046592972813	0.0253494999064964
AGTTCGTCCTATCGCACAAGGTCT_4	1.84647153433731	0.0508017345330495
ATGCCTGTATCGGTGTTCGAGTGA_4	1.37229210037711	-0.0221305
GTGCCATATACATCGGCCAGTGTT_4	1.93939909611384	0.00942668758051851
TTGGACGTAAGGACACGATCGTAC_4	2.02288860126027	-0.13353
AGCACTTCTGCAGGTAGCCAGTAT_4	1.25585744346531	-0.00522192
CCTTGTAGGAAGAGGTGTTCATGG_4	1.55516407180018	0.0924059877010795
ACAGCTCAGTAGAGCATCTGAGAG_4	1.71797748208234	0.019327319310867
CGGCTAATCTTGCTGTGCGTTCTA_4	2.11865108172688	-0.101907
GCTATCCTCTATCGCACGAACTGT_4	1.96314599015588	0.0507291162672926
AGCGTGTTCTGACACATTAGGTCG_4	2.07485483602994	0.0840332083900528
TTCGTTGGTTGGTGAGCTCTGGTT_4	1.9386163698785	-0.0957676
ATGACGTCCTAGGCATAACCGAAG_4	2.17396595497255	0.0126095341845751
GCAAGATCTACCAGGACACTGACA_4	1.74458990163088	-0.070077
CAGTCCAACCTACTGATAGGATGC_4	1.79079765648861	-0.136394
AACCGTTCTGTGAAGCCTCTGGTT_4	1.34410174040383	0.33310530308528
CCTTGATCGCCTTGTTCATAACGG_4	1.10804077551973	0.161971652996267
CGGTTGTTACTCGTTGCAAGCAGT_4	1.91069241913079	0.10378982281988
CACTAGCTTGTGCGTTCAGTCTTC_4	1.77274588547505	-0.0959569
CAGTCCAAGCTCTGTACTCTGGTT_4	1.79718263641344	-0.0123485
CACTAGCTAAGGACACAAGGCTGA_4	1.99562603783676	-0.0746377
GAAGTTGGCAGTTCTGAGCAGATG_4	1.90487085972727	-0.117414
GACGATCTCAGTTCTGCGGAATAC_4	1.83479089224211	-0.115914
TCGCTGTTTGATCGGAAACCTCCT_4	1.82716743814349	-0.0567475
CGTGTGTACGTCAATGTGTGGTAC_4	2.00622392997997	0.0964794237316144
ATCACACGAGTGCAGTTCGTAGTC_4	1.5744273277918	-0.0158113
GCTATCCTCGGATTGACAGTCTTC_4	2.01462068241906	0.119237777028605
GTTCTCGTACCAGCTTCAAGTGCA_4	1.33005	0.144601869990957
TCGCTGTTAGGCTTCTCATAACGG_4	1.63678031030444	-0.0827065
GTCATCGAAGTCTGTGCGTGTACT_4	1.97409016888464	-0.024909
AGCACTTCCACAAGTCACTGTGTC_4	1.91952073140071	0.0412786416931734
ATGACGTCACGATGACAGTCAGGA_4	1.4029929583715	0.0536739309687465
ACTGAGGTAATGCCTCTGCCTCTT_4	1.84212765099587	0.0415012859965333
ATCGATCGTGAGGTGTATTCTGGC_4	1.89534084524576	-0.0300374
TGTGACTGAGCTCCTATTGTCGGT_4	2.15019998781997	-0.138603
ACTCCATCGACGAATGCATGGAAC_4	1.68521195054837	0.015174789858889
CGACGTTATACGGTTGCCATACGT_4	1.95706710575266	0.022977412492951
GTTGTTCGGAGATGTCAGCAGATG_4	1.91608168992501	-0.0698545
TGGTACAGCAACCTAGCTTCACCA_4	1.61902265425726	-0.114922
AGAACGAGCTCAGAGTGCTTCTTG_4	1.89151934655397	0.109169890847631
CACCTGTTTCGAAGGTCTTCACCA_4	2.19758778571646	-0.0941745
TATCGGTCTTGATCCGACCTTCTC_4	1.82034051395932	-0.0890145
TAACCGGTCTCAGAGTACATAGGC_4	1.97380805472543	0.0407692029483703
TCAGGCTTGAATCGTGTTGTCGGT_4	1.28311042445751	0.025665786229339
ACTGAGGTTGTGCGTTTTAGGTCG_4	1.71485214878096	0.0390973501065713
TCGCTGTTGAATCGTGCTAACTCG_4	1.28139900482086	0.0756231343983805
CGACGTTACCTACTGAGCGTTCTA_4	1.65242193108529	0.0529794718629766
CATACCACATGGTTGCATTCTGGC_4	2.0905991262924	-0.0714585
AGCACTTCGAAGAGGTTTCTCTCG_4	2.08370996689879	-0.137966
TACGCCTTACATTGCGTCGTGGAT_4	1.81172805598528	0.0512009121334627
CGCATGATACCAATGCTTAGGTCG_4	1.69575443445413	0.00506720063254007
TCGCTGTTGATAGCGAGCTGTTGT_4	1.95330242735765	-0.0981653
GTGCCATATTGATCCGAACCTTGG_4	2.11461545340675	0.0380754100068504
GAGACGATCAGTTCTGCTCTGGTT_4	1.64632167047481	0.0681353365172956
ATGCACGACTTACAGCAGTTCGTC_4	2.15567864469369	-0.0364563
GTTGACCTCGACCATTGAGCTCAA_4	2.04174615769739	-0.0031081
CGACGTTATGCAGGTACGTAGGTT_4	1.64382978374215	-0.0494952
TTCGTTGGCGGATTGACGAACTGT_4	2.09687644636467	-0.127111
CGGCTAATGAGGACTTATTCTGGC_4	1.67203701707142	0.0366335068278922
GTGAAGTGTCCGTATGTGCGTAGA_4	1.84345639674136	0.00115235288464677
CACCTGTTCGACCATTTTACGGCT_4	1.9030187979101	0.011096979613761
CATACCACCGAGACTAGTTCATGG_4	1.75165161107764	0.109987706082557
ACTCCATCTCCGTATGAAGGCTGA_4	1.83675160223188	-0.0167144
ATCGCCATCAATCGACACTGTGTC_4	2.08198719065301	-0.0636622
GATCGAGTCTCATTGCACTGTGTC_4	1.84417960268155	0.111853132372702
GTTGACCTGTATGCTGACTGCTAG_4	1.92115498779381	-0.0722508
GAAGTTGGTAGTTGCGTCCGAGTT_4	1.91078462147702	0.106958244982334
TTGCGAAGCAGTTCTGATTCTGGC_4	1.88675685431351	-0.0471043
TCGCTGTTCTATCGCAGTGTTCCT_4	1.96930685167394	-0.128736
ATCCAGAGGAACGCTTCATAACGG_4	1.88256983462693	0.0890080511745907
ATCCGGTATCTCGCAACTCAGCTA_4	1.63050269454341	0.0881641522591094
TATCGGTCTTCAGGAGCTGCGTAT_4	1.64289172742285	0.0315994658528541
GAGACGATCCGACTATTCGTAGTC_4	1.73030812606893	-0.117577
CAGTCCAAATCGGTGTGCTTCGAA_4	1.36139735262101	0.0158635026712213
AAGCACTGGATAGCGATCAGACGA_4	1.6858044788593	-0.0784006
TATCGGTCGAGGACTTACCGCATA_4	1.85133316924664	-0.10864
GTTGTTCGCTCATTGCTGCCTCTT_4	1.94069876050293	-0.0950043
GAAGGAAGGTCTGATCCCAGTGTT_4	2.17364069857084	-0.0974408
TCGCTGTTACGATGACTGCCTCTT_4	2.19740179143868	-0.0667094
GTTCTCGTACCAATGCAGGCATAG_4	1.70819230620185	0.059941134522775
TACGCTACAAGGACACCGATGCTT_4	1.92045274193706	-0.0557186
ATCGATCGCCTACTGAGCTTAGCT_4	1.85195440995864	0.10179068325744
GTTGACCTCAGTTCTGTTGACAGG_4	1.69753265670658	0.0278566863184069
CGCAATCTCAGTTCTGTCGACATC_4	1.87325661344179	-0.114973
TACGCCTTCTTGCTGTACTGCTAG_4	2.01843660478519	-0.0312493
ATATGCGCCTCATTGCTGGTCCTT_4	1.71829935754312	0.0884835150760156
ATGCCTGTGTCAGTTGACAGCAAC_4	1.74069012351321	0.0281444960863087
CATGGCTAGTCTGATCCTGGTTCT_4	1.99882906281215	-0.0761245
TGCTTCCACGTACGAAGTATTGGC_4	1.75685707909672	0.0127862002628002
CTTGTCGAGTCAGTTGTTACGGCT_4	1.83597115453149	0.0147844273786769
CGTTGCAAAATGCCTCCAAGTGCA_4	1.65097463960072	-0.0757777
TGGACTCTTCTCGCAATATCAGCG_4	2.02601	-0.081642
ATCCGGTATGCAGGTATGCCTCTT_4	1.86145507053518	0.0899041560085558
GTCGAAGACAGTTCTGCGGAATAC_4	2.01832650555235	-0.0362364
GATTGCTCGATGCACTCAGTCTTC_4	1.80928722552271	0.0158254424815233
GACGATCTCGTTATGCTGGTCCTT_4	1.71422643186431	0.0471102447440115
GTTACGCAAGTGCAGTCAGCGATT_4	2.01511705380344	-0.0798851
ATCGATCGCGTTATGCACCATGTG_4	1.48127278392628	0.0280003180214144
GAAGTTGGCTATCGCAACTGCTAG_4	2.17502506699997	-0.164476
GTTACGCACGACCATTCGTAGGTT_4	2.03692413833883	-0.12299
CCGTAAGATCCGTATGTACACGCT_4	1.99298706889056	-0.0784416
GATCGAGTGTAGAGCACTCTGGTT_4	1.63003687167858	-0.0353555
CGGTTGTTTACCAGGAGCTTCGAA_4	1.96505427145105	-0.0301435
TAACCGGTCTTGCTGTTCTGCTCT_4	1.83025557870929	-0.116146
GCTATCCTAAGGACACGATCGTAC_4	1.7120468061618	-0.0578403
GTCGAAGACATTGCCTAGCAGATG_4	1.96320208674223	0.050576823025752
GTGAAGTGCATTCGGTAACCTTGG_4	2.01397767731625	0.0298422778310008
GTCATCGAACCTAAGGACCATGTG_4	1.7411074910219	-0.0558729
ATGACGTCGATAGCGACATAACGG_4	1.99975873840403	0.0524963863584378
CAACACCTGAGGACTTCGAGTATG_4	1.46994641826567	0.0177509772286373
CCTTGTAGGATACTGGTGCGTAGA_4	1.60560650861711	0.0524376801269941
GACGATCTCTGACACACGAACTGT_4	2.0214195092215	0.0722415181911811
CGCATGATAGCTCCTAAGTCAGGA_4	1.02551870582273	0.0798842917199025
TGGACTCTCCGACTATACCTTCTC_4	1.88918504020603	0.0702062582822028
AACGTCTGTCCGTATGACTGTGTC_4	2.02983280505891	0.00156307610738701
TGCTTCCACCAAGTTGGCTGTTGT_4	1.81338373414468	0.021803324212532
GTGAAGTGGTATGCTGATTCTGGC_4	2.14120725888264	-0.0556499
CATGGCTAAATGGACGAGGATGGT_4	1.82965494738795	0.00160452848266265
CTTGTCGATTGGTCTCTCAGACGA_4	1.86067865743281	0.114327185299602
TCAGGCTTACCAGCTTTGTGGTAC_4	1.81949266518169	0.0578556093566396
GACGATCTTCTAACGCACCTTCTC_4	1.90316813141207	-0.0581109
CGACGTTACGTTATGCATGGAAGG_4	1.98921590154056	-0.06048
GTTACGCACGTCAATGGATCGTAC_4	2.36226983124556	-0.00693802
GTTACGCAGCCTTGTTTCGAGTGA_4	2.1971530968951	0.00538670375244132
AGCGTGTTGAAGAGGTTTGACAGG_4	1.90694	-0.0672208
GCACAACTCAACCTAGTGTGGTAC_4	2.19378150008887	0.0631090582130032
AGAGTAGCATCGGTGTGACAAGAG_4	1.97720606150072	0.0984116788457338
ACCACGATGTCCTAAGATTCTGGC_4	1.82819756626756	0.0520778610263326
GAACATCGTCCGTATGTGCCTCTT_4	2.04940316382134	-0.0966263
CGTTGCAATTACCGAGTCCGAGTT_4	1.8911905854073	-0.158356
GTGAAGTGGTCTCCTTCAAGGTCT_4	1.50263361715179	0.0154921361933406
ATGCCTGTGTCTGATCTTGTCGGT_4	1.82687564303491	-0.0181261
GCGTCATTTTACCGAGACCGCATA_4	1.90980464066553	-0.0577945
CCTGATTGCGTCAATGTAGCCGAA_4	1.93323476146406	-0.0220662
CAGTCCAACGTCAATGACCTTCTC_4	1.89282389597413	-0.0461489
GAGACGATCGAGACTAAACCTTGG_4	2.05216491335038	0.131604939249776
GATTACCGCAATCGACGCTTAGCT_4	2.16971413229613	-0.0745263
CGGTTGTTTACGGTTGCGTGTACT_4	1.78851782267612	0.0722576739494142
AGCACTTCGCCATAACTCCGAGTT_4	1.67728239798302	-0.0324734
CCGTAAGAGACTTAGGCACTGACA_4	1.9608764309787	-0.0256936
GAACATCGCTTGCTGTACATAGGC_4	1.68811188943909	0.013059683120888
ATGCACGACGACCATTCGAACTGT_4	1.51772447123193	-0.0215806
ACGACTTGCATTCGGTAAGAGCCA_4	2.17449091606635	-0.145871
TCGCTGTTAGGAGGAACAAGGTCT_4	1.83551143541323	-0.0519111
GTTCTCGTTGCAGGTATCGTGGAT_4	1.96308707655722	0.064706876590532
AGTTCGTCCGCTAGTACCAGTGTT_4	2.20034271840862	-0.0640429
AGCACTTCACGTGATGAACTGGTG_4	1.93802309074799	0.0114194615306924
ACTGAGGTCAACCTAGTAGCCGAA_4	1.95041912024346	-0.0409014
CACCTGTTTGCCATTCTAGCCGAA_4	1.88244080307039	0.0404054056172337
TATCGGTCGTCGGTAACATAACGG_4	1.6909836714936	-0.103673
CGGCTAATAGTGCAGTAACCTCCT_4	1.97947784520612	-0.0916989
AACCGTTCCATTCGGTACCTTCTC_4	2.11925475462683	0.0208399602632292
CCTTGTAGCTGGAGTACTGGTTCT_4	2.02858827141816	0.0137119574250681
TGTGACTGAGTGCAGTAGGCATAG_4	1.6332151549849	0.0823515145228999
GCTATCCTCGTTATGCTCGTGGAT_4	2.0801544259027	-0.101416
TGTGACTGAGGCTTCTTCGTAGTC_4	2.13566004798796	-0.031897
GTTGACCTCTCAGAGTACCTTCTC_4	1.66057997155876	0.0741011256396129
CACCTGTTCGTCAATGCGAGTATG_4	1.99065924536274	-0.132221
GTTGTTCGGCCATAACTATCAGCG_4	0.961105909924403	-0.0279186
GTGAAGTGGTCGGTAACGGAATAC_4	1.80977194021279	0.0723286516161751
GATTGCTCCAACCTAGAAGGCTGA_4	2.22615764284322	-0.10902
AAGCACTGCATTGCCTACCTTCTC_4	1.87309895211648	0.0375933740929281
AGTTCGTCCACAAGTCGAGCTCAA_4	2.06645724147322	-0.0439049
AGAACGAGCTGACACAAACGGTCA_4	2.11256783548648	-0.0831247
GCACAACTCTCATTGCCCAGTGTT_4	1.86062150704497	-0.0133845
TACGCCTTGTAGAGCATGCACCAA_4	0.902362079688343	-0.0166797
AGCGTGTTGCCTTGTTTAGGATGC_4	1.86047939664116	0.00867266751353912
TATCGGTCTGATCGGACCAGTGTT_4	1.85228740177209	0.0148675732903444
CAATGTGGCAGAATCGGCAATTCG_4	1.94068820432034	0.0365505829902728
ACGGAACAGAACGCTTCTCAGCTA_4	1.83979664583694	0.0211051248562782
CGTGTGTACATTCGGTTCTCCGAT_4	1.73483305258983	0.0186171407091005
CAATGTGGAAGGACACACATAGGC_4	1.88077630679944	0.0733839005128545
CGTGTGTACTGGAGTACTTCGTTC_4	1.95287637784179	0.0451992004284662
ATGACGTCACCAGCTTCATAACGG_4	1.78305151195846	0.0848310857724792
CATGGCTAACGTGATGCTCAGCTA_4	1.91325063264235	0.0464551774469579
GTGAAGTGACCAATGCGCTGTTGT_4	1.82349987294589	-0.0667214
CTGTTGACTGATCGGATCCGAGTT_4	2.06533	0.00368064281502375
ACAGCTCATAAGTGGCTTGTCGGT_4	1.7841901261134	-0.0514925
GCACAACTCTCTACTCGTCTAGGT_4	2.17316914402032	-0.0880251
TCAGGCTTCCGACTATTTGTCGGT_4	1.58935371133661	-0.0766549
AAGCACTGCGTCAATGAAGAGCCA_4	2.1252607235371	0.0756129315629278
TAACCGGTTCTCTAGGCACTGACA_4	2.06437561656227	0.0110544955123891
ATGCCTGTAGGCTTCTTGTCCAGA_4	1.6383017702081	0.0142114990132001
TACGCTACGAACGCTTTGTCCAGA_4	1.90888602228625	-0.10953
TACGCTACCCAAGTTGAGCAGATG_4	2.23512927469165	0.0334695686436776
ATCGATCGTAGTTGCGTCACGTTC_4	1.92320399079184	0.022020418407894
GTAGGAGTTGTGCGTTTCAGACGA_4	1.91247747058779	-0.0667145
TGAAGACGTGATCGGATAGCCGAA_4	2.0397144950337	-0.0732997
CGTGTGTAAGTCGACACTCTGGTT_4	2.14490617706883	7.29757852787616e-05
ATATGCGCAGGTTCGAGCACGTAA_4	1.91225278195654	0.144287443175977
GATTGCTCCGATAGAGTTCTCTCG_4	1.8893495856239	0.0542665500350683
CTGATCGTTTGGTGAGTGCACCAA_4	1.84496884468658	-0.0631479
TCGCTGTTCACAAGTCAGGCATAG_4	1.86253953650033	0.0540409341744615
CGACGTTATTGATCCGGCACGTAA_4	1.90559347360503	-0.0372879
TGGACTCTCAGTTCTGAACGGTCA_4	2.11910979836226	-0.0218544
GATGTGTGTACCAGGATGCCTCTT_4	1.65457354304332	-0.0468212
TTCCAAGGGAGATGTCTCGAGTGA_4	1.71756438443134	0.0767942514540876
GAGCAGTAAGCTCCTATCTGAGAG_4	1.80484510696456	-0.0352865
AACTGAGCCATTCGGTACCATGTG_4	1.82460793553155	-0.0418368
AACTGAGCTAGTTGCGAGCAGATG_4	1.75968601783001	0.0208492119193907
AGAGTAGCAGAAGCGTTTCAGCCT_4	1.74154414169949	0.0780488369492873
CTTCGACTCTGGAGTAACCATGTG_4	2.08253243932686	0.0375713240174362
CGTGTGTACTGGAGTACCAGTGTT_4	1.92558106999495	0.0962195980182739
GATCGAGTCTAGGCATCATCTACG_4	1.94098317133302	-0.0490039
ATCGATCGATTCGAGGACGTCGTA_4	2.09815978393536	-0.0147301
CCTTGTAGCCTACTGACTCTGGTT_4	1.8197059115991	0.00629004872856348
TTGGACGTCTAGGCATCGTGTACT_4	1.93910397761293	-0.0337823
CGTGTGTAATCGGTGTAGCAGATG_4	1.90272534897719	-0.00791269
TTGCGAAGTCTCGCAAGCGTTCTA_4	1.86232319182173	-0.111562
ACGGAACAAGGTTCGATTCTCTCG_4	1.58956731679418	-0.015077
ATATGCGCCGACCATTTGCCTCTT_4	1.84730834362109	0.0625005016677029
TTCGTTGGCAGAATCGCATCTACG_4	1.73300518956443	-0.082443
CAACACCTCTAGGTGAGATTGGAG_4	1.65886879161499	0.0033159290235121
GCGTCATTGATGCACTCGTGTACT_4	1.55378038428889	0.040969353449709
AAGCACTGCTCAGAGTCGGAATAC_4	2.08558965866277	-0.0364175
ACGACTTGAGGTTCGACCAGTGTT_4	1.77279351847127	-0.120125
CTGATCGTGATAGCGATTGACAGG_4	2.11025883004542	-0.0927247
CCTTGATCCGGATTGAGCGTTCTA_4	1.97853744734779	-0.0143247
TCGCTGTTGAATCGTGCAGCGATT_4	2.13649452718355	-0.0529331
TTGCGAAGCGTTATGCAGGATCTG_4	2.02908495852904	0.0191161669310947
CACCTGTTCTCAGAGTCGAACTGT_4	2.06195158549585	-0.175966
TTCGTTGGGTCGGTAAACCGCATA_4	2.1157508974629	-0.050306
TTCCAAGGAATGCCTCTCGTAGTC_4	2.22297374956967	0.0403350514851816
GCGTCATTACATTGCGGCTTAGCT_4	1.83338163488565	-0.0733789
ATCGATCGGTCGGTAAACTGTGTC_4	1.43436941932678	0.0543710527772479
CCTTGTAGCTAGGTGACGAGTATG_4	1.49188691683887	0.0339472685165801
CGCAATCTCAGTTCTGAGGCATAG_4	2.06358985131545	-0.0449064
ACGTTCAGATTCGAGGCACTGACA_4	1.79067145874985	-0.0219908
CATACCACCTTACAGCTGCACCAA_4	1.88189558061239	-0.106946
GACGATCTAGTCTGTGGCGTTCTA_4	2.11418851901598	-0.0975406
GTTCTCGTATGGTTGCTACACGCT_4	1.91250805946274	0.0698727349337847
CGGCTAATGCTCTGTATGCCTCTT_4	1.96889264234776	-0.115937
ATCACACGTGTGCGTTCTCTGGTT_4	1.81995596099085	0.138628313579245
GACGATCTAAGGACACAGGCATAG_4	1.70317111848132	0.0649406201085081
CAATGTGGCGTCAATGGCTTCTTG_4	1.65538335096044	0.0873613667421024
CGCTCTATTTGATCCGATTCTGGC_4	1.97498262547269	-0.0400324
TCGCTGTTAATGCCTCGCAATTCG_4	1.98281123944958	0.00570911649185896
TTGGACGTTCTAACGCTTCTCTCG_4	1.70789	-0.00589177
TACGCCTTTGCCATTCTTGACAGG_4	2.01561169927653	0.0743608985097259
ATATGCGCCAGAATCGACATAGGC_4	1.74458550491213	0.0741260244800352
CGCAATCTCTCATTGCAACCTCCT_4	2.0117663421335	-0.0134419
AGAGTAGCGTATGCTGAGCAGATG_4	2.00172666429699	-0.0216089
ACCACGATTAGTTGCGGATTGGAG_4	2.34477090749073	0.0187216720679367
TTGGACGTTTCAGGAGCATGGAAC_4	1.5348647707599	-0.0630831
CACTAGCTCTAGGCATTCGTAGTC_4	1.73497150661283	0.0211132346117033
ACAGCTCAGAGATGTCGTATTGGC_4	1.78021902241567	-0.0722235
CGTGTGTACTCAGAGTTGCCTCTT_4	1.5794904426441	-0.000326513
TGAAGACGATTCGAGGACGTCGTA_4	1.64064950229921	0.119817173694519
AGAGTAGCGAACGCTTTCCGAGTT_4	1.91877797047313	0.0138896642001417
GATCGAGTGCCTTGTTTCTCCGAT_4	1.82118804937472	0.153339744018897
TATCGGTCTCTCTAGGCGAACTGT_4	1.71003550580837	-0.077576
TTGGACGTTTACCGAGACCATGTG_4	2.0297352580419	-0.107538
GATTACCGATTCGAGGGTATTGGC_4	2.02153440323436	-0.12301
GTAGGAGTACGATGACACGGTCTT_4	1.57387490857259	-0.0225216
GTTGTTCGCAATCGACCTTCACCA_4	1.44092351068079	-0.0067543
CGGCTAATCGCTAGTATTACGGCT_4	1.70062	-0.0583915
AGTTCGTCTTGGTCTCTTACGGCT_4	1.90750435249664	0.0488861849806369
TCAGGCTTCTCATTGCGCTGTTGT_4	1.7737731396576	0.0258880570254388
TGGCATGTCTCAGAGTCTGCGTAT_4	1.09152448026641	0.200641634278629
TAACCGGTGTCGGTAATCGACATC_4	2.05559420658153	0.105228469181601
ATGCCTGTTCTCTAGGCATAACGG_4	1.88158780863436	-0.0844645
GTCGAAGACTTGCTGTGCGTTCTA_4	1.31766340795475	0.0551018646635135
CTTAGGACTCCGTATGCTTCACCA_4	1.57722018032791	0.00863821239213025
GAGACGATACGATGACCAGCGATT_4	1.7168015330633	0.0277995229060823
GCAAGATCGTCTGATCTCTGAGAG_4	1.84498674921568	0.0786769792925295
CGCATGATTCTCTAGGGCTGTTGT_4	2.06345457361563	-0.057679
GTGAAGTGAGGAGGAACAGTCTTC_4	1.90791979017322	0.0477181833043813
GCAAGATCTCGAACCATCTCCGAT_4	2.02188463323652	-0.00963053
TGAAGACGCTTACAGCCAGGTATC_4	2.04773705513788	-0.0934953
CATGGCTACTCATTGCCTCAGCTA_4	1.65035040052253	0.0247329383905425
ACAGCTCAGACTATGCTTGTCGGT_4	1.99332255971765	0.0136561073653554
TTCGTTGGCCAAGTTGACAGCAAC_4	1.97043183095928	-0.0964182
CTTAGGACTCGAAGGTTCACGTTC_4	2.05323829973866	-0.050806
CTTGTCGATGGAGAGTGCTTAGCT_4	2.11715338041365	-0.106824
CAGTCCAATGGAGAGTGCGTTCTA_4	2.04277384475886	-0.0430115
GAATCCGAAGTCGACATTCAGCCT_4	1.85372739049866	0.000236641574124147
CTTAGGACACCAGCTTTCAGACGA_4	1.72539643249531	-0.0461315
GAAGTTGGTGTGAAGCACGTCGTA_4	2.07282589225511	0.0484555107484048
CTTGTCGACTCTACTCTGCACCAA_4	1.74495142556317	-0.0290174
AGAGTAGCAGCTCCTAAGGCATAG_4	1.99133539595242	-2.27366e-05
GAAGTTGGGAGATGTCCAGCGATT_4	1.93006829143067	-0.0253353
TTGCGAAGTTGGTGAGAGGATGGT_4	1.96745873887728	-0.0542923
AGAACGAGGTCTCCTTTATCAGCG_4	1.41347076233129	0.130227364121473
TGCTTCCAACTCGTTGACCTTCTC_4	1.83065758952886	-0.0554234
GACGATCTAGCTCCTAAGCAGATG_4	1.99361712277396	0.0030296479221846
ACAGCTCAGTCTGATCCTGCGTAT_4	1.8437671295527	-0.0558207
TATCGGTCGACTATGCGTAGCATC_4	2.14063567431926	-0.0666464
TGGACTCTACTCGTTGTTGTCGGT_4	2.05192210220315	-0.119578
AACCGTTCACCAGCTTCATAACGG_4	1.98503724256559	0.10723824011416
GCAAGATCTTGGTGAGTATCAGCG_4	1.64831374352674	0.0488858990370776
CTTAGGACCAGAATCGCATAACGG_4	1.7917401802773	0.00465022023078826
CTTCGACTTTGGTCTCAACCGAAG_4	1.88746477649868	0.0970103323701954
AAGCACTGCCGACTATACCTTCTC_4	1.42580447238406	0.0365351514496497
ACAGCTCATCTCGCAATTAGGTCG_4	1.88505982802799	0.0994209918770833
GTCATCGAAGGAGGAAGTGTTCCT_4	1.76451512531865	0.0131388616975933
ACTCTCGAACCAGCTTAGGCATAG_4	1.50727469595195	0.0139337231942973
ATCCAGAGAGTCTGTGCTGGTTCT_4	1.79271047353772	-0.058875
GAGACGATCCTACTGACAAGTGCA_4	2.02432062026895	0.0190211410601557
AGCACTTCGATAGCGAACTGTGTC_4	1.80616106211009	-0.0205034
CATACCACTGATCGGACGAACTGT_4	1.12510423001196	0.0802865696562579
TTCGTTGGCACAAGTCTAGGATGC_4	1.67538129007207	-0.101231
CCTTGTAGTGTGCGTTAACGGTCA_4	1.6340714567971	-0.0878668
GATTACCGCAACCTAGAAGAGCCA_4	1.92225483694811	-0.0412869
CGTGTGTACTGACACAAACCTTGG_4	2.01567432932187	-0.0393006
CGGTTGTTTGCAGGTAGCCAGTAT_4	1.64469424266718	0.0493416566577635
TGGCATGTCTATCGCACTAACTCG_4	2.18662878674543	-0.0257515
CCTTGTAGACGATGACACGGTCTT_4	2.05068687016937	-0.10139
AGTTCGTCCACAAGTCTACACGCT_4	2.07810683921827	-0.0741953
ATGCACGAAATGCCTCCTGCGTAT_4	0.918695558777906	0.200449082611621
GAGCAGTAGACTTAGGTGGTCCTT_4	1.99832098851766	0.109936717529591
GCACAACTAGGAGGAACTGGTTCT_4	2.11150679272304	-0.0288449
GAGCAGTAGCCTTGTTGACAAGAG_4	0.981944044718419	0.131013581808729
ATCACACGTGCCATTCAAGAGCCA_4	2.05687812101868	-0.153103
CATGGCTATTCAGGAGACGTCGTA_4	1.78823232539186	0.0651934747283981
ACTAGGAGTCTAACGCGTCTAGGT_4	2.33996128797264	-0.0597757
TGGTACAGCCGACTATTCTGCTCT_4	2.2201435927894	-0.0666654
ACAGCTCAATCGGTGTTTACGGCT_4	1.80962948430032	-0.125045
GTTACGCACAATCGACTCGAGTGA_4	2.12694829671023	-0.0864536
GATCGAGTGACGAATGCATCTACG_4	2.10369975130929	-0.049041
TCAGGCTTATTCGAGGGTAGCATC_4	2.08598872629409	-0.0294473
GATTACCGTTGGTGAGGAGCTCAA_4	2.02738546951026	-0.0490438
TCGCTGTTAATGGACGCCAGTGTT_4	1.80997145509204	0.0479659364222805
TGAGCTAGAGGAGGAAACATAGGC_4	2.01122732109389	-0.125583
GAGCAGTAAGTGCAGTCTTCACCA_4	2.05959366012568	-0.090679
TTCGTTGGCGCTAGTAGTATTGGC_4	1.76941512283931	-0.0630636
AACGTCTGAATGGACGCATCTACG_4	1.83917528555443	0.0993037933931433
ATGCCTGTTCTCTAGGCGTGTACT_4	2.07005731282798	0.0186064234711368
CAGTCCAAAATGGACGTCGAGTGA_4	2.13976051954669	-0.0247046
CAGTCCAATGCCATTCACCATGTG_4	2.05196501912286	0.0243984289344858
GTTGTTCGTCGAAGGTGCTTCGAA_4	1.99896826600659	0.0686484488445325
TTGGACGTTGTGAAGCACATAGGC_4	1.85505920230691	-0.029411
TAACCGGTGTCCTAAGACCGCATA_4	1.84092052579662	-0.13949
ATGACGTCGTATGCTGACTGTGTC_4	1.77490657593417	0.0278896368479585
CAGTCCAATACATCGGAAGGCTGA_4	2.01971850119107	-0.10305
ACTCCATCACTCGTTGCCTTCCTT_4	1.63447122106125	-0.0592341
GTTACGCACTAGGTGACGTAGGTT_4	2.08541798854547	-0.143715
ATCCAGAGTGTGCGTTCCAGTGTT_4	1.86809217123039	-0.192265
CATACCACCTAGGCATTGCGTAGA_4	2.18756076025236	-0.0769732
GACGATCTTGGAGAGTAGTCAGGA_4	2.09862964349841	-0.0486727
ACGTTCAGCATTCGGTAAGAGCCA_4	2.07872528290523	-0.139502
TTCGTTGGGCTCTGTACTTCACCA_4	2.16402178583686	-0.00789696
GTTGACCTCAGAATCGTCTGCTCT_4	1.86034463842601	-0.0140476
CTTAGGACAGTCGACATAGCCGAA_4	2.06680660601513	-0.0847426
CTTAGGACAGGTTCGATGCACCAA_4	1.70253833366123	-0.0278073
GAAGTTGGACGTGATGTGTCCAGA_4	1.80190863017276	-0.00256014
ACTCTCGACAGAATCGCATCTACG_4	1.75019447866423	-0.0632166
AGAGTAGCCGATAGAGGCTTCTTG_4	1.7734542026386	-0.0173771
TGGTACAGCTCATTGCGTTCATGG_4	2.01823042158557	0.0581391631420101
ACCACGATACTCGTTGTCGTGGAT_4	2.03430617479052	-0.0803572
GTGAAGTGTCCGTATGCGAGTATG_4	2.05477787839758	0.0365064954321819
CCTTGTAGTCGAAGGTAACTGGTG_4	2.0275677811116	-0.125979
CGGTTGTTCTCAGAGTTGCGTAGA_4	1.79584126720355	-0.0779416
TGAGCTAGCGCTAGTAGCGTTCTA_4	1.91245339228894	-0.0424193
GATTACCGAATGCCTCTTGTCGGT_4	2.0143684637518	-0.0510695
CGCAATCTCATTGCCTCATAACGG_4	1.83295194220165	-0.142037
GTTGTTCGCTAGGTGATGTCCAGA_4	1.70852058023497	0.0505459283551568
CCTTGTAGGCCATAACAACCGAAG_4	1.7975912990024	0.0326180214556275
CTTGTCGAACATTGCGCGATGCTT_4	2.28404835238712	0.00190622451551295
AGTGGATCTGTGAAGCGCCAGTAT_4	1.86289426191607	0.0466479726495523
ATCCAGAGCGATAGAGCCAGTGTT_4	1.76034828089103	-0.0903264
CGGCTAATTACATCGGAGCAGATG_4	2.1748147266301	0.0281827968040812
GAAGGAAGTCGAAGGTAAGGCTGA_4	1.92056529386584	-0.0204572
AGAACGAGCTGACACACTACAGTG_4	1.9751374840706	-0.0568024
AGAACGAGAGAAGCGTCGAACTGT_4	1.72700624668426	-0.0185145
TTGCAGACTGATCGGAACGGTCTT_4	2.09251811710159	0.0114248367364682
CGACGTTAAGTCGACACAGCGATT_4	1.96439557593185	-0.0401945
CTGTTGACAGGTTCGAGCGTTCTA_4	2.05330844997245	-0.049352
GTCGAAGAGAATCGTGCGAGTATG_4	1.92270102870522	-0.102888
TGGACTCTACTCGTTGTCTGAGAG_4	1.95781412767852	-0.073724
CGGCTAATCGGATTGAGCCAGTAT_4	2.07843266530896	-0.0499148
GATGTGTGCTCAGAGTCTCTGGTT_4	1.88144487210664	-0.0871388
CAACACCTCGATAGAGTTAGGTCG_4	2.0064993977589	-0.220141
TTCCAAGGCGATAGAGTTGACAGG_4	1.92859669417201	0.014566638344977
AACGTCTGGTCGGTAACCTTCCTT_4	1.64331191880303	0.0647872339453597
ACTCTCGACAACCTAGTCACGTTC_4	1.63437673095163	-0.0419173
GAAGTTGGCTCTACTCAGGTCACT_4	2.08530421377536	-0.0755055
CGCAATCTAGTCGACATTGACAGG_4	1.79245	-0.0861241
GTCGAAGAAGTCTGTGCAAGCAGT_4	1.93201941162426	0.0466494747526756
GTCATCGACGAGACTACGAACTGT_4	1.79480806923562	0.0274934784761713
AGAGTAGCCAATCGACTCAGACGA_4	1.92184596589757	-0.0973842
GAAGTTGGTACGGTTGATTCTGGC_4	2.02598569377606	-0.0459434
CGACGTTAAGGTTCGAAACCTCCT_4	1.78049908035184	-0.0544622
AGAACGAGGACTTAGGGTTCATGG_4	1.99898257003469	-0.0343281
TATCGGTCAGTGCAGTCGAACTGT_4	1.48032773498074	0.050635588722122
GTAGGAGTGCCATAACCAAGTGCA_4	2.10302534837146	-0.0495596
TAACCGGTGAAGAGGTTTAGGTCG_4	1.14171555014316	0.0871580166998602
TACGCCTTGAGATACGACCGCATA_4	1.70926715287254	-0.014891
TACGCTACCGTCAATGTTCAGCCT_4	1.9501890237485	-0.130734
ATGACGTCGAATCGTGTTCTCTCG_4	1.78992406644425	-0.0733599
GTCGAAGATCTCGCAATTGACAGG_4	1.61746622576569	0.0868744971131232
GCAAGATCTACCAGGACTAACTCG_4	1.11158513023594	0.141643632276502
GAATCCGAACCTAAGGCTAACTCG_4	2.09515624605831	-0.0364496
ACAGCTCAGTCAGTTGGCTTCGAA_4	1.90160022581323	-0.0592104
CGACGTTAGTCGGTAATCCGAGTT_4	2.03864628768345	-0.0147326
ACCACGATACCTAAGGGACAAGAG_4	2.33797387166414	0.123589454278729
ATGCACGACGAGACTAATGGAAGG_4	2.39252494886022	-0.117644
ATGCCTGTCAACCTAGACCTTCTC_4	2.17298235031992	0.100851557485445
TTGGACGTCGACCATTAACCTCCT_4	1.70947102593819	0.0551518339191778
GAATCCGACTGACACAACGGTCTT_4	2.27533603651929	-0.0596285
TGGTACAGCTAGGTGAACTGCTAG_4	2.32611788094908	-0.0607727
CTTAGGACAAGGACACTTCTCTCG_4	2.34096325728386	-0.0184841
ATGACGTCTTCAGGAGGCTTCGAA_4	2.02211456086926	0.0514695251544303
CGTGTGTACGTTATGCCATAACGG_4	1.71426150477072	0.0575087876123538
TTGCAGACTCTCTAGGGATTGGAG_4	2.09570883521446	-0.0196328
ATGCCTGTCCGACTATCTGCGTAT_4	2.0921439680563	0.0681393502747657
CAGTCCAAAGTGCAGTTCGTAGTC_4	2.58062818135788	-0.0604564
GTCATCGAGCTCTGTACGAACTGT_4	2.06214267737918	-0.0919575
TTGCAGACTCGAAGGTCATGGAAC_4	2.33299304847689	-0.0157572
CATGGCTAGAATCGTGAACCTTGG_4	2.05977405499518	0.034761235993591
CTTCGACTCGAGACTAGCTTAGCT_4	2.03672736306898	0.0261761110552505
ACGACTTGAGGAGGAACTGCGTAT_4	1.9906022378941	-0.124894
CGCTCTATCCGACTATGTATTGGC_4	2.25352076157545	0.00460371667783155
GAGACGATCTCATTGCCACCACTA_4	2.23761052311558	0.0155163693118775
CGCTCTATCCTACTGATCGTGGAT_4	1.64911459667257	-0.0752285
GTCGAAGATGATCGGACGAACTGT_4	1.8552	-0.0905129
TTGCGAAGAGAAGCGTTGCCTCTT_4	2.25933914606229	-0.0611496
ATCCAGAGCGAGACTACAGCGATT_4	1.80172569812581	-0.0719325
CCTGATTGGCCTTGTTCATGGAAC_4	2.09281348128083	0.109347364873106
CGTGTGTAACCAATGCGCAATTCG_4	1.72028186606001	0.0162195613187068
GTGAAGTGACGTGATGCTACAGTG_4	2.57378302697761	-0.0294488
TTGCAGACGAACGCTTTCAGACGA_4	2.47221669197082	0.0113931990830798
GACGATCTGTCGGTAACGATGCTT_4	1.5239210496461	-0.00396811
ACTAGGAGACTCGTTGTAGCCGAA_4	2.39990570545569	-0.0263979
GAACATCGTCCGTATGCTTCGTTC_4	2.03250804371312	-0.0353785
GCAAGATCATCGGTGTTTGACAGG_4	1.94317735036597	0.0293861959497778
GAGCAGTACTCATTGCGTTCATGG_4	2.13518714205426	0.00468936317665528
GTTGACCTTAAGTGGCGCCAGTAT_4	2.26962155846276	-0.0169618
CGACGTTATAAGTGGCTTAGGTCG_4	2.19455658892082	-0.0679103
CACCTGTTCCAAGTTGTTCAGCCT_4	2.15011774850406	-0.0572426
GTCATCGATGTGCGTTAGGATCTG_4	2.43311301208455	-0.0836732
TGGTAGCTAGGTTCGAACGGTCTT_4	2.4803531533164	-0.0896219
CCGTAAGATCTCTAGGCCTTCCTT_4	1.98971497648706	0.00257731377906179
AAGCACTGATGGTTGCTGCACCAA_4	1.75375508671689	-0.0620676
TATCGGTCTTACCGAGAGGCATAG_4	1.97427526226306	-0.0655617
ATCCAGAGGACTATGCTGTCCAGA_4	2.28041926830978	0.0641368341482448
GAAGGAAGGAAGAGGTAGGCATAG_4	2.04517450128887	-0.0605503
TGCTTCCAGTCTGATCTGGTCCTT_4	1.00446050112033	0.166473478402763
CCGTAAGACTGACACAGCTTCTTG_4	2.60026212062658	-0.00322609
TGGTACAGGACTATGCAGCAGATG_4	2.10619909565457	-0.125989
GTCATCGAAGTGCAGTGATCGTAC_4	1.88783474888704	-0.0268979
TTGGACGTGTCAGTTGGTGTTCCT_4	2.09905473887564	-0.0956727
AACTGAGCTGATCGGAGCAATTCG_4	1.54258942981673	0.218195527775932
AACGTCTGGACTTAGGTCTGCTCT_4	2.07178907704039	-0.00779759
TATCGGTCTACCAGGAACCATGTG_4	2.15639190055785	0.0267152095074249
CAGTCCAACGAGACTACCATACGT_4	2.25923096107265	-0.0497896
TACGCCTTGATACTGGTCGACATC_4	2.41530448930856	-0.0366104
GATGTGTGTGAGGTGTCATCTACG_4	2.46249611408875	0.007838436609685
GTGCCATAACGTGATGTCTCCGAT_4	2.06881959557205	-0.177397
AAGCACTGTACCAGGACAGGTATC_4	2.43633057881181	-0.0253325
TGTGACTGCTCATTGCCATCTACG_4	2.23103143051417	-0.0546675
ATCGATCGCCGACTATCTCAGCTA_4	2.4304264390156	0.0327269045323278
GAATCCGACATTGCCTCATGGAAC_4	2.10963788751352	0.0347601506457265
ACAGCTCAACCAGCTTCGTGTACT_4	1.67499605381426	-0.0515598
TTCGTTGGCAACCTAGAGGATGGT_4	2.31785813814653	-0.0234095
GATTGCTCGTCAGTTGCAAGTGCA_4	1.86924863716561	0.0405773356418394
GTTGTTCGTTGGTGAGGTATTGGC_4	1.6730161023217	0.0104079113355784
ACGGAACACGACCATTTTGTCGGT_4	2.37943918942018	0.00271726232032615
ATCCGGTACTATCGCAAGCAGATG_4	2.42340185362742	-0.0417779
CTTCGACTTACGGTTGAGCAGATG_4	2.19209696835433	-0.0629669
GAAGTTGGTGGAGAGTAGGATCTG_4	1.89620888270282	-0.0967958
TGGTACAGAATGCCTCATGGAAGG_4	2.41402615307056	0.0334590970741548
ATGACGTCCCAAGTTGGCTTCGAA_4	2.35413654936366	-0.0289901
GTTGTTCGGTCTCCTTCAGGTATC_4	2.28587478616751	-0.0325891
GTGCCATACTCTACTCACATAGGC_4	2.6295402953024	-0.0910799
GCGTCATTAAGGACACTGGTCCTT_4	2.12637415131098	-0.11614
CGACGTTAAATGCCTCACCATGTG_4	1.51027474235119	0.00462312331202436
TTGCAGACTTGGTCTCTTACGGCT_4	1.02804648426227	0.107905781962948
GTTCTCGTAGCTCCTACTTCACCA_4	2.43224073272956	-0.0824229
CCGTAAGACTTACAGCTCACGTTC_4	1.82195880178071	-0.104094
TTGGACGTCGGATTGATAGGATGC_4	2.04652	-0.104604
GCGTCATTCAACCTAGAAGAGCCA_4	1.99907002200631	-0.0850964
GTGAAGTGGACTTAGGCGGAATAC_4	1.57957779310498	-0.00512777
CTGATCGTCATTGCCTAAGGCTGA_4	1.57883023366775	-0.0845145
CTGATCGTCATTGCCTTAGCCGAA_4	2.03226022333285	-0.0589109
TTCCAAGGATGGTTGCTAGGATGC_4	2.20121169413057	0.0643496451932805
CGCATGATCAGTTCTGTTACGGCT_4	2.14557272928231	0.0727390372170577
TAACCGGTCTCAGAGTAGGTCACT_4	2.47521957610347	-0.016071
AACTGAGCGCTCTGTATTACGGCT_4	1.51307465174475	-0.0106466
TTCGTTGGTCGAACCAGAGCTCAA_4	2.00393958111484	-0.0232564
CGCTCTATGACTATGCATGGAAGG_4	2.39622402576767	0.0258917263291721
ACGACTTGCCAAGTTGCCTTCCTT_4	2.41529742785857	-0.0294588
CCTTGATCTGCAGGTACAGTCTTC_4	2.27488984427884	-0.016578
ACTAGGAGGACTTAGGTCGACATC_4	2.21286849101789	-0.0172522
ATCGCCATACGATGACCGATGCTT_4	2.32435783215683	-0.0761677
TACGCTACTGCAGGTATGCCTCTT_4	1.89087003628874	-0.0660528
ATCGATCGCATTGCCTGCTTCTTG_4	1.30338056145122	0.02037176767346
TAACCGGTGAGATACGCTGGTTCT_4	2.50255976165908	-0.0474805
CAATGTGGTTACCGAGCAAGGTCT_4	1.90339823975176	0.0589479293397997
TGGTACAGGCTCTGTACAAGCAGT_4	1.7349513766314	-0.0356099
GCTATCCTGACGAATGCTGCGTAT_4	1.83451049313627	0.0118161851261677
CCGTAAGATCTAACGCTCGTAGTC_4	2.36507753883482	0.0801342114414943
GTTACGCAAGGTTCGAGCAATTCG_4	1.87483249715538	-0.103869
CTTGTCGACGCTAGTACGATGCTT_4	2.37753419328116	-0.0349862
TTCGTTGGGAGATACGTCCGAGTT_4	2.47408277689846	-0.0633189
ATCCGGTACGATAGAGGCAATTCG_4	2.18919871161363	-0.02419
ATCACACGCTGACACAGCTTAGCT_4	2.5576972581162	-0.0523439
GTGAAGTGCCAAGTTGCTTCACCA_4	2.32690779733548	-0.0496449
CGCAATCTAAGGACACCTGCGTAT_4	1.99272795051877	-0.0136641
GAATCCGAAGCTCCTACGGAATAC_4	2.49256407950495	-0.101873
AGCGTGTTACCAGCTTTTAGGTCG_4	2.03465096470253	-0.0757017
TCGCTGTTGTCCTAAGGATTGGAG_4	2.32734995283552	-0.130969
GCGTCATTGCCTTGTTTTACGGCT_4	2.4509422243753	-0.0689675
ATCACACGGCCTTGTTTCTCCGAT_4	2.33042195415099	-0.0455204
CCGTAAGAGCTGGATTACCTTCTC_4	2.25525523133978	-0.115536
AGTGGATCGCTGGATTTCTGCTCT_4	2.01970792513662	-0.0671426
TACGCCTTTCGAACCATGCCTCTT_4	2.03269309296057	-5.89823e-05
TGTGACTGGATACTGGAACCGAAG_4	1.8086483580843	0.0565412166092007
ACTGAGGTCTCAGAGTTCTGAGAG_4	2.31289514436709	0.0330821718000961
TTGGACGTACCAATGCGCTTAGCT_4	2.12716216892467	-0.16467
CGGCTAATACGTGATGGCATACAG_4	1.6405416936724	-0.0970829
GACGATCTCTCAGAGTCCTTCCTT_4	1.68483803715585	0.0667158562604537
GTGCCATATACGGTTGACTGTGTC_4	2.18625815847663	0.0153330979610362
CGGTTGTTCCTACTGACTGGTTCT_4	1.85217421777828	0.00506964595121967
CAATGTGGCGATAGAGGCGTTCTA_4	2.31190895485758	-0.0754234
AGTGGATCTACCAGGACACCACTA_4	1.78494011477908	0.115306209023148
TACGCTACACCAGCTTTCGACATC_4	1.89990931489321	0.107991544464144
AACCGTTCCATTCGGTACCATGTG_4	1.82798539630146	0.101120748909718
ATGCCTGTCGAGACTATGGTCCTT_4	2.08433739180977	0.0403462203873074
GATCGAGTAGGTTCGAAGGTCACT_4	2.21370754732452	-0.000463041
ATCCAGAGGCCTTGTTGCTTCTTG_4	2.22687752793546	-0.0924512
CAACACCTACATTGCGTACACGCT_4	2.36357088794889	-0.0529771
GATGTGTGCTAGGCATTGTCCAGA_4	1.89005343791693	0.0291020576043063
TGGACTCTTTACCGAGTATCAGCG_4	1.95552953657228	-0.0822807
TAACCGGTGTCGGTAATTGTCGGT_4	2.48577331781696	-0.118682
ACGTTCAGACGATGACTGCCTCTT_4	2.19720649218695	-0.0542327
TGAAGACGACCAATGCGCATACAG_4	1.94702214672977	-0.0553858
CAGTCCAAATCGGTGTCGGAATAC_4	2.40197828819049	-0.0570467
CGGTTGTTAGTGCAGTTCCGAGTT_4	2.37683118568016	-0.0603882
GAATCCGACGTACGAACGTGTACT_4	2.25542404241698	-0.0955007
CGTTGCAACATTGCCTTTCTCTCG_4	1.82655370769583	-0.0273146
GTTGACCTGTCGGTAACAAGGTCT_4	1.91778479739671	0.0740168416033548
GTTGTTCGCACAAGTCTCAGACGA_4	2.03886864257535	-0.0111797
TGCTTCCAGTCCTAAGGTCTAGGT_4	1.38478881238348	0.0292258635153658
ATGCCTGTCGCTAGTAGTATTGGC_4	1.89653272542706	-0.124719
GAAGTTGGTGGAGAGTTAGCCGAA_4	2.58747592880091	-0.103228
TACGCTACCTCAGAGTTCACGTTC_4	1.97306384073775	-0.0305233
CCTTGATCAGTCGACACCTTCCTT_4	1.8492864439842	0.0845035355811142
CACTAGCTAGTCTGTGTGCCTCTT_4	2.19334173107543	-0.0124144
AGTGGATCCCGACTATCGTAGGTT_4	2.32529305563299	-0.00481567
ATCCGGTAGAGATGTCCACTGACA_4	2.57234906393598	-0.0246161
ACTCCATCTGCCATTCTGGTCCTT_4	1.61074961954915	0.0105115191588825
AGTTCGTCTGAGGTGTTTGTCGGT_4	2.38985192882791	0.010556473013062
CGTTGCAAGTAGAGCAGCAATTCG_4	2.37471094455582	0.00217304986926292
ATATGCGCTTGATCCGGTGTTCCT_4	1.74346794657001	-0.0399432
GATTGCTCGATACTGGATGGAAGG_4	2.40729525912249	-0.0125979
GTTCTCGTGAGATGTCCAGCGATT_4	2.42175483585387	-0.0339268
TGAAGACGGAAGAGGTCTCTGGTT_4	2.03193626470325	-0.0170931
AGCGTGTTAGGAGGAAGCATACAG_4	2.49309869837104	-0.0796353
CGCATGATCGAGACTAAACCTCCT_4	2.17073719647083	-0.105846
TAACCGGTCTGACACAGCTTCTTG_4	2.43469080864278	-0.0725733
CCTTGTAGCGCTAGTAAGTCAGGA_4	2.2818616854088	-0.042149
GATTACCGTCGAAGGTTCCGAGTT_4	2.29914098933034	-0.032486
GATCGAGTTTGGTGAGAGGATCTG_4	2.39848905778759	0.00025506507346662
ATCGCCATGAAGAGGTAACCTCCT_4	1.71391947077582	0.00242662211388675
AACCGTTCCAACCTAGCAAGTGCA_4	2.03893324720931	-0.0227175
ATGACGTCCGATAGAGCATCTACG_4	1.70656139728292	0.0559440945600778
CTGATCGTACGTGATGCACTGACA_4	2.28176809357724	-0.00461707
TTGGACGTACTCGTTGAGCAGATG_4	1.82512795718916	-0.0187652
TGAGCTAGAATGCCTCCTCTGGTT_4	2.41201990776543	-0.0913865
GTGAAGTGCTCTACTCGCTGTTGT_4	1.82014716757867	-0.0402517
AGTTCGTCGTCGGTAACGATGCTT_4	1.87121931414309	-0.157605
TAACCGGTGTAGAGCACCATACGT_4	2.37284436990861	-0.0240451
CGTTGCAACACAAGTCACTGTGTC_4	2.01435768363031	-0.140811
AACGTCTGCGTACGAACAAGGTCT_4	2.24589018134422	-0.0720151
TCAGGCTTTGATCGGATCTGAGAG_4	2.13271443276897	0.0692432385273176
ACCACGATCATTGCCTCCAGTGTT_4	2.1812187211579	-0.138411
ATATGCGCAATGCCTCGTTCATGG_4	2.14094089771363	0.0504574555542657
CACTAGCTCGCTAGTAGCTTAGCT_4	1.7994867606184	0.0195866358626968
TCGCTGTTAGTCGACAGCGTTCTA_4	2.20204334341533	0.0091545084971548
TGGCATGTGATACTGGGTTCATGG_4	2.49077822100585	-0.00984514
CACTAGCTAATGCCTCAAGGCTGA_4	2.09771397638254	-0.0836068
CGCTCTATTCCGTATGACGTCGTA_4	1.67605020453765	0.0165214540989764
CACTAGCTCCTACTGAACGTCGTA_4	2.37419157735134	-0.0881503
CCGTAAGACCTACTGAATTCTGGC_4	2.08022784857603	-0.0352725
CCTTGTAGTGAGGTGTCTACAGTG_4	2.02683878547092	-0.0442335
CATACCACTACCAGGACAAGGTCT_4	1.73533415353992	0.15636927518771
ATCACACGGAACGCTTTCTGAGAG_4	2.04984874116985	-0.0328358
TTCGTTGGCAGTTCTGCTCAGCTA_4	2.35415928203026	-0.0244394
CCTTGATCGTCTCCTTCTGCGTAT_4	1.83667844603877	0.0638392879907634
AGCACTTCTACGGTTGACCATGTG_4	1.64191050094312	-0.00925533
TTGGACGTACCAGCTTCATAACGG_4	2.49272624775297	-0.0896687
ATGCCTGTCTCTACTCAGGATGGT_4	2.29364775800961	0.00380770322618773
GAGACGATCATTGCCTACCGCATA_4	2.0115022949109	-0.128021
AGCGTGTTACGTGATGAACGGTCA_4	1.89287831534687	-0.123228
TATCGGTCAATGCCTCTACACGCT_4	2.18925615927193	-0.0987934
AGCACTTCCGACCATTATTCTGGC_4	1.63139800281319	0.0248657102280386
AGCGTGTTGTCCTAAGTGGTCCTT_4	2.50835402135419	-0.0186115
GTCATCGAGAGATACGCTCAGCTA_4	2.24811728324311	-0.105488
ATGCCTGTTCCGTATGGTAGCATC_4	1.77815716434768	0.0117640954838962
TGAAGACGCGTACGAATCCGAGTT_4	2.32850067219043	-0.0272805
AGAACGAGCGAGACTAGATCGTAC_4	1.86080570265938	0.0748172720325889
TGCTTCCACACAAGTCGTATTGGC_4	2.25730754402335	-0.0682232
ATGCCTGTGAGATGTCTGGTCCTT_4	1.80403571764636	0.0106763162840269
AAGCACTGCTCAGAGTTTAGGTCG_4	2.40618719658187	0.0844155721405676
ATCGCCATACATTGCGTTGACAGG_4	2.04371919318783	-0.0678016
GTTGTTCGTACATCGGACGGTCTT_4	1.90871815238932	-0.059009
ACTCTCGACGAGACTAGTATTGGC_4	2.06727372290964	0.139415040871086
GTCGAAGACATTCGGTACCATGTG_4	2.42489900370969	-0.0421646
CGCTCTATTGTGAAGCAGGTCACT_4	2.56556289705811	-0.0695915
GTCGAAGACCAAGTTGGCATACAG_4	2.39853478016345	-0.0841955
CCTGATTGCGAGACTACTACAGTG_4	2.09222	0.00412382530202104
CGGCTAATAATGCCTCCCATACGT_4	2.03546110575653	-0.0579961
TGCTTCCACTCATTGCAGGATCTG_4	1.3975269308177	-0.149969
ATCCGGTAGAGATGTCTCCGAGTT_4	1.83254345121441	-0.0218419
TGAGCTAGTCGAAGGTTCTGAGAG_4	2.37787571606338	0.0732073699172658
TGCTTCCACTGGAGTATGCGTAGA_4	1.42527660025352	-0.0421632
AGTGGATCGTCGGTAACGATGCTT_4	1.98465582565176	-0.02615
GATAGGCTTCGAAGGTGATTGGAG_4	2.60906605920399	-0.115292
TCGCTGTTGAGATACGGATTGGAG_4	2.1729223788251	-0.06308
TCAGGCTTGCCTTGTTACTGTGTC_4	2.10223418038738	-0.00338033
AAGCACTGCCAAGTTGGCCAGTAT_4	1.98724420929921	-0.0426616
GTCGAAGACGACCATTACATAGGC_4	2.09568218607206	-0.107808
AGTTCGTCTCTCGCAACTGCGTAT_4	1.85346603478426	0.0484293597633151
TTCGTTGGTGTGCGTTAGCAGATG_4	1.69839954063127	0.10041413409593
CCTTGATCAGCTCCTATCGTAGTC_4	1.90099432293957	-0.00142605
TACGCCTTCTGGAGTATCAGACGA_4	2.39909158702715	-0.0414454
TGGCATGTTACATCGGACGTCGTA_4	2.01689993746075	-0.0752393
GTTGACCTAAGGACACTGGTCCTT_4	1.83721302670386	-0.086074
CACCTGTTGCCTTGTTCAAGGTCT_4	2.4968682169049	-0.0911139
ATGCACGACGGATTGAGTTCATGG_4	1.7594525060135	-0.0209765
ACAGCTCAGATAGCGAGACAAGAG_4	2.00324642432968	-0.167722
TGGACTCTTCGAAGGTCAAGTGCA_4	1.98018921031451	0.0606109742020181
GATTACCGCAATCGACGTATTGGC_4	2.46678157830413	-0.0230697
CACCTGTTCACAAGTCGTGTTCCT_4	1.97681487793854	0.0461015038832869
ACTAGGAGAGAAGCGTAGCAGATG_4	2.44050119393526	-0.106746
TAACCGGTTGAGGTGTAACCGAAG_4	2.50504207350705	-0.0577344
GTTGTTCGATCGGTGTGTATTGGC_4	2.16936614730813	-0.0903428
ACGTTCAGAGTCTGTGTTGTCGGT_4	2.10778112215887	-0.0896981
GTTGTTCGCTATCGCATCTGAGAG_4	2.4928273772093	-0.00616319
TCGCTGTTCGCTAGTAAGGATGGT_4	2.60717920065316	-0.0564329
GCGTCATTGAGGACTTTCGTGGAT_4	1.88696808407172	0.0321165263534802
GATTGCTCTCGAACCACTACAGTG_4	1.71545520411299	-0.00550228
CCGTAAGATCTCTAGGGCTGTTGT_4	1.76068759729062	0.0433987650663457
ACCACGATGAGATGTCTCGTAGTC_4	2.35043347614419	-0.0819235
CGTTGCAACAGAATCGTCAGACGA_4	2.06427919839249	-0.0636408
GTTGACCTGTCGGTAATCGACATC_4	2.03078806566384	-0.124398
AGTGGATCGAATCGTGAGGTCACT_4	2.49644079787647	-0.0587986
CTTCGACTCAACCTAGTCGACATC_4	2.22406279328214	0.0141817742380031
TACGCTACGAACGCTTTATCAGCG_4	2.48270955772852	-0.0521155
ATGCACGACTAGGCATTATCAGCG_4	2.49259644880543	-0.00366347
CGCAATCTAGAAGCGTCGAACTGT_4	2.02317737479293	-0.120417
CTTCGACTGTCAGTTGCTTCACCA_4	1.99788132713529	-0.0276542
CGTTGCAACGGATTGACTCAGCTA_4	2.34384602858524	-0.0190402
TACGCCTTACCAGCTTTTCTCTCG_4	1.81890448541424	-0.0194999
CATACCACCAATCGACTTCTCTCG_4	1.7289541839633	0.085620169584926
TTGCGAAGGCTCTGTAACGTCGTA_4	2.41580300521627	-0.00848744
AACGTCTGGTCGGTAAATTCTGGC_4	2.34313969639664	-0.0533748
AAGCACTGGCTGGATTATGGAAGG_4	2.30987578162179	-0.0228889
ACGGAACACCGACTATTCTGAGAG_4	2.47163197891498	-0.0840344
GTCGAAGATACCAGGAAGCAGATG_4	1.80554463379808	-0.00758843
CACTAGCTCGTCAATGCAAGGTCT_4	2.53985713529241	-0.0389899
AGAACGAGAGTCGACAGCACGTAA_4	1.74068779967904	0.0342920398772035
GCGTCATTCACAAGTCTGGTCCTT_4	2.60197088274253	-0.0154765
AGTTCGTCGTCTGATCACTGCTAG_4	1.81697849320352	0.0271926096221471
GTTGACCTAAGGACACTATCAGCG_4	2.25792329690131	-0.0363093
TCGCTGTTGAGATACGGCGTTCTA_4	2.64636318915087	-0.022322
GAAGTTGGTTGGTCTCTTCTCTCG_4	2.22495310684289	0.0615084891517478
CGTGTGTATAAGTGGCCAAGGTCT_4	1.57468816480848	-0.0609624
CTTGTCGAAATGGACGCGTAGGTT_4	2.49197726097891	-0.00868265
AGCGTGTTGTCGGTAATCGACATC_4	2.49585755846465	-0.068441
CCTGATTGAGGTTCGAAACCTTGG_4	2.15724996795515	-0.0146837
TACGCTACAGTGCAGTCACCACTA_4	1.91595740497838	-0.104847
AACTGAGCCCTACTGATGTCCAGA_4	1.85849860365909	0.0312708208100367
CCGTAAGATAAGTGGCCACCACTA_4	1.8187744053951	-0.0257311
TGGCATGTGACTATGCTCACGTTC_4	2.32739621972694	0.0735842137084809
CGACGTTATGTGCGTTCTAACTCG_4	1.43099304517327	0.0802920156636616
CACTAGCTCTAGGCATCAGGTATC_4	2.13869352728788	-0.0924121
GATTGCTCTGGAGTTGGCTTCTTG_4	1.64509656844445	-0.0374723
CAACACCTCTTGCTGTCAAGCAGT_4	2.48682406945658	0.0458266922119283
AGCACTTCACTCGTTGTTCTCTCG_4	2.1978108056795	-0.0519586
CGCAATCTTTGGTGAGTCTCCGAT_4	2.47093668774901	-0.0204132
CAACACCTTCCGTATGGAGCTCAA_4	2.26617822068991	0.00367355419869012
ACGACTTGGAACGCTTCAAGTGCA_4	2.0773137656001	0.0241055937178332
ACCACGATCGATAGAGAACCTTGG_4	1.91720900658381	0.0316491465584324
TCAGGCTTGAGATACGAACCTCCT_4	1.9500381606583	-0.0411664
TTCGTTGGAGGAGGAACCATACGT_4	2.26315799315134	-0.0344304
TTGCGAAGCTCTACTCCAGTCTTC_4	2.43785577797919	-0.0587597
CATGGCTAGTCTCCTTCGTGTACT_4	1.77397868657034	0.00447117983107942
TGAAGACGAGTCGACAGCACGTAA_4	2.08409835041242	-0.0697597
CGTGTGTACTCATTGCAGCAGATG_4	2.41124003916809	0.0188286145231318
CCGTAAGACGATAGAGCAGGTATC_4	2.47235881795305	-0.0373395
GAGACGATGTATGCTGACCGCATA_4	1.97066362280227	-0.0408783
TGGTACAGAGTCTGTGTACACGCT_4	1.83081344841726	-0.028238
TGAAGACGCCTACTGATTAGGTCG_4	1.54222916089668	-0.0696355
ACGGAACACTGGAGTAGTAGCATC_4	2.19702716055182	-0.0510473
CCTTGTAGCAATCGACTGTGGTAC_4	2.07576050556309	-0.0447554
ACTCCATCGCTCTGTATTCTCTCG_4	1.82217693211547	0.0156137454932503
CTTCGACTTACCAGGACACTGACA_4	2.2347655095309	-0.0215991
AGAACGAGACTCGTTGGATCGTAC_4	1.41695837722982	-0.0886627
GTTGTTCGTGTGAAGCCATCTACG_4	1.97459620080788	-0.0294867
TACGCCTTGAAGAGGTCGTGTACT_4	2.29642103647569	0.0421153771842682
CATGGCTATTGGTGAGTAGGATGC_4	2.36298569664767	-0.0103545
ATGCCTGTACGTGATGGTAGCATC_4	1.72055300723923	-0.00372452
GTCATCGACTTGCTGTGCAATTCG_4	2.37238757455574	0.00257565935579335
ACGACTTGGAATCGTGTAGCCGAA_4	2.66149562748258	-0.122097
CGGTTGTTACATTGCGCAGTCTTC_4	2.26925703274436	-0.0473358
GATCGAGTTGCCATTCACGTCGTA_4	1.57750262037861	-0.0162089
CACTAGCTAGTGCAGTCGTAGGTT_4	2.29094272891403	-0.105123
CGCAATCTTTGATCCGCTGCGTAT_4	1.71130126804309	0.0157042246933519
AACCGTTCCGAGACTAAACCTTGG_4	2.51409509099319	-0.0802522
GTTGACCTGCTCTGTAACAGCAAC_4	1.87809909086543	0.0313608584428621
CGCAATCTAGGAGGAAACCTTCTC_4	2.34644788907996	-0.0824311
ACTGAGGTTACATCGGTAGCCGAA_4	1.90902486804047	-0.00199804
AGTGGATCCTCAGAGTCATGGAAC_4	1.73865373157572	0.126978103050738
ATCCAGAGAGTCGACAACGTCGTA_4	2.5487303639604	-0.0222671
GCGTCATTGTCCTAAGCGATGCTT_4	1.89760066026907	-0.0313547
ACGACTTGCATTCGGTTAGGATGC_4	2.47912215289838	-0.0730994
CATACCACTCTCGCAAACCATGTG_4	2.05085867579192	-0.0929883
CGCATGATGACGAATGAACCTCCT_4	1.35377024281976	-0.0359092
ACTCTCGAGTCGGTAAGTATTGGC_4	1.34994452804057	-0.00906117
TGAAGACGCGGATTGAGCTTCGAA_4	1.75256042929296	0.000725833567066236
GAGCAGTAGATGCACTCTTCGTTC_4	2.04023816135859	0.182705798001535
CACCTGTTTTGGTCTCAGTCAGGA_4	2.05860813205507	-0.066637
GAAGGAAGCCTACTGATCGACATC_4	2.04473084490389	-0.0851405
TCAGGCTTACCTAAGGTCTGCTCT_4	2.15586778480119	-0.0490598
AAGCACTGACGATGACACGGTCTT_4	2.40846236021043	-0.0625039
ATGACGTCCGTTATGCACTGTGTC_4	0.999502108091818	0.260324536433672
TGGTAGCTAGGCTTCTCTCAGCTA_4	1.85221938533705	0.0411583893968099
GTTGTTCGGCCTTGTTCTCAGCTA_4	2.50931237272854	-0.0590532
CGACGTTAACCTAAGGTTGTCGGT_4	2.07386139269245	-0.0212829
CGTTGCAAAGGCTTCTCACTGACA_4	2.49100543184036	-0.0128432
GAATCCGAGCCATAACCTCTGGTT_4	2.43848861176526	-0.0697508
CAACACCTCCGACTATTGCGTAGA_4	1.87079284826048	0.115568925563289
CACTAGCTTCTAACGCAACCGAAG_4	2.55240901596034	-0.0327239
GATCGAGTCACAAGTCTCGTGGAT_4	2.14231858689583	0.0934638770130422
TAACCGGTCACAAGTCCCAGTGTT_4	2.32532538131357	-0.0822947
GTGAAGTGGTAGAGCAGTGTTCCT_4	1.64311969541833	0.0381705785908104
GAAGTTGGGAATCGTGCGTAGGTT_4	2.52818414874748	-0.0050153
ATGCACGACATTGCCTGCAATTCG_4	2.33294932260777	-0.0474848
ATGCACGAATTCGAGGGCCAGTAT_4	2.07667424535377	-0.0255192
ACGGAACAGCTGGATTTATCAGCG_4	1.72707597604189	0.178485047334784
AAGCACTGAAGGACACGTATTGGC_4	2.23506397721584	-0.0764039
CTTAGGACCAATCGACAACTGGTG_4	1.80250363559912	0.0169816671400776
GAAGTTGGCAGAATCGCTGCGTAT_4	2.39631964077509	-0.0218594
GACGATCTTTCAGGAGCGTGTACT_4	2.19925815376186	-0.026323
AACCGTTCTTGGTCTCTCTGCTCT_4	1.90467312451755	-0.0558187
CACTAGCTGCCTTGTTCGTGTACT_4	2.18273677636467	-0.10976
GCTATCCTTGTGCGTTTGGTCCTT_4	2.43556395933409	-0.0971325
GTAGGAGTATTCGAGGGCTTCTTG_4	2.11953752333978	-0.120177
GCACAACTGCTGGATTGTAGCATC_4	2.3745128967289	-0.0727273
ACTCTCGATCTCTAGGAGGATGGT_4	1.73057230544457	0.0567669605254538
CAGTCCAACATTGCCTTGCACCAA_4	2.55271833276387	-0.0397452
GTGCCATACATTCGGTGCAATTCG_4	2.50245346063807	-0.0960243
TAACCGGTAGTCTGTGCCTTCCTT_4	2.50249576204597	-0.0676117
ATCCGGTAGTCGGTAATGTGGTAC_4	2.50799785103888	-0.0382158
GATTACCGCGCTAGTATCCGAGTT_4	2.20446237662398	-0.00119528
TCAGGCTTAGAAGCGTCATGGAAC_4	2.46222279705319	0.0535332257216492
ATGCCTGTGAGATGTCCTTCACCA_4	2.17244285040158	0.0406625359499855
TCAGGCTTCTAGGTGAGTGTTCCT_4	2.2705012828167	-0.0174918
AACGTCTGCTCAGAGTTGCGTAGA_4	1.9960480295352	-0.0342924
GCGTCATTATCGGTGTTCACGTTC_4	2.17928370881984	-0.0173226
GACGATCTCTCATTGCACCATGTG_4	1.7464157931373	-0.090164
CACTAGCTCACAAGTCAGGCATAG_4	1.97984652624048	-0.0450001
GATTACCGTCCGTATGTGCACCAA_4	2.17805813152943	-0.0621484
CGTGTGTACTAGGCATACATAGGC_4	2.40104348524473	-0.0761698
ATCGATCGGTAGAGCACTTCACCA_4	2.36155264304128	-0.0632997
TATCGGTCAGAAGCGTGACAAGAG_4	2.1219551897829	-0.0933441
ATCCAGAGCGCTAGTAGCATACAG_4	2.5266538405371	-0.0775654
GATGTGTGTAGTTGCGCGAGTATG_4	1.85542327513116	-0.0350646
ACGTTCAGGCCATAACGCAATTCG_4	2.50537488609365	-0.0919513
TAACCGGTGAGATGTCGTATTGGC_4	2.4105604003555	0.0678602720746747
GACGATCTGTAGAGCACTAACTCG_4	1.95851637647133	0.0443227786335647
ACGACTTGCATTCGGTCTACAGTG_4	2.04428643464517	-0.14677
GAAGGAAGACGTGATGACCTTCTC_4	1.58701948698099	-0.0551396
GTTACGCAGATGCACTCCAGTGTT_4	2.3437886263938	-0.093621
AGAGTAGCCCGACTATTTGACAGG_4	1.71090134849968	0.044897215457161
TGGCATGTCATTGCCTGTGTTCCT_4	2.50551844182398	-0.016609
ATCCAGAGGTCGGTAATATCAGCG_4	2.58094368448359	-0.0156495
GCTATCCTTGATCGGAGCTTAGCT_4	2.27094451666332	-0.0897112
ACGACTTGTGGAGAGTACCGCATA_4	2.43311240936126	0.0218225064059791
GACGATCTTCGAACCAGTTCATGG_4	2.20700974158018	-0.0603074
GTCGAAGACTCAGAGTGCACGTAA_4	2.19004220128009	-0.0540159
AAGCACTGGACTTAGGGTTCATGG_4	2.20907633749962	0.0497316905224628
GTCGAAGACTCAGAGTACAGCAAC_4	2.0883189438528	-0.0518286
ACAGCTCAGAGGACTTCATAACGG_4	2.01680573292449	-0.0588383
AAGCACTGGACTATGCGATTGGAG_4	2.33328274724603	0.0302926418616005
CATACCACTGCAGGTATATCAGCG_4	1.81611386445707	-0.0317139
GTGCCATAGATAGCGATTGTCGGT_4	2.03827374963506	-0.051548
GCGTCATTTGGAGTTGCCAGTGTT_4	2.17315503357079	-0.131883
CTGTTGACTTCAGGAGACGTCGTA_4	2.28356949978772	-0.0516207
TACGCTACCTGACACAGCGTTCTA_4	2.19537997126563	-0.0100141
AGCGTGTTTGAGGTGTGTGTTCCT_4	2.40993776715214	0.103928470298518
GATGTGTGCGAGACTACAGCGATT_4	1.79241816610261	-0.0809949
CCTTGTAGCTAGGCATCAAGGTCT_4	2.32698182390392	-0.0414072
GAACATCGTAGTTGCGCTGCGTAT_4	1.94108588405364	-0.0618231
AGTTCGTCCTTACAGCAACTGGTG_4	2.36554527502364	-0.0586804
CGACGTTACGGATTGATCCGAGTT_4	2.08660662713431	0.0795400035897438
GCAAGATCTGATCGGAAACTGGTG_4	1.89295319067138	-0.0527733
CAATGTGGGATACTGGCGTAGGTT_4	2.33400575023289	-0.00253179
GATCGAGTGATGCACTTCACGTTC_4	2.23457956073812	0.0167772209384515
ATGACGTCCGAGACTAAGCAGATG_4	1.99948809871181	0.00767757603164851
AACGTCTGCAATCGACCATCTACG_4	2.63659424685159	-0.0162226
GTTGTTCGTGTGAAGCCGGAATAC_4	1.99563777040209	0.0102198250157398
CAATGTGGTGATCGGATTAGGTCG_4	1.95365685734496	-0.0748756
CGTTGCAACTTACAGCACCGCATA_4	1.88780571690713	-0.0463687
TTCGTTGGACATTGCGATGGAAGG_4	2.46106589721066	-0.0451714
CAGTCCAAAAGGACACAGCAGATG_4	0.939498332620222	0.152506313823403
TGTGACTGGATAGCGATCGTGGAT_4	1.7425781318083	-0.035612
ATGACGTCCCGACTATCTGGTTCT_4	1.81027547411523	-0.00286991
TATCGGTCTTCAGGAGTCACGTTC_4	2.36496882980362	0.000651443078924147
ACGACTTGTGCAGGTACCATACGT_4	2.45546030734238	-0.0732628
GAGCAGTACATTGCCTACAGCAAC_4	1.55463955758432	0.036630144226675
AACGTCTGGCCATAACCAGTCTTC_4	2.41552432550199	-0.105432
CAACACCTCAGAATCGTGGTCCTT_4	1.87358771208762	-0.0489844
GAACATCGTACGGTTGGCTGTTGT_4	2.32326517885419	-0.059311
TTCCAAGGTTACCGAGAGTCAGGA_4	2.22288	-0.0830252
ACGGAACAAGAAGCGTAACCGAAG_4	2.44811002473632	-0.0555716
GATAGGCTGACTATGCCCATACGT_4	2.18090757903592	-0.0567105
TGAGCTAGTGGAGAGTGTTCATGG_4	2.48425710186615	-0.0351407
CCTTGATCGCTGGATTCTACAGTG_4	2.48529392363647	0.0693109393663266
CCTGATTGTGCAGGTATTCAGCCT_4	2.13659062836742	-0.0243149
CTTCGACTCTCAGAGTAGTCAGGA_4	1.90335053900444	-0.0672523
TGTGACTGTTGGTGAGCGAACTGT_4	2.36478133540383	0.0571430082646012
ACGACTTGATGGTTGCTGCACCAA_4	2.19769266008506	-0.0849058
ACTCTCGATTGGTGAGCTGGTTCT_4	2.41298685707618	-0.0235237
ACCACGATCAGAATCGGTCTAGGT_4	2.48991989147947	0.00417117203055239
GATTGCTCACCAATGCTCACGTTC_4	1.92555180504461	0.0239515364597278
TGGACTCTAGTGCAGTGCTTAGCT_4	2.14278	0.0220025070562938
ACCACGATTCGAAGGTTACACGCT_4	2.40057521475445	0.00315982748814619
GATTACCGAAGGACACGTGTTCCT_4	2.14055580264112	-0.00780232
TATCGGTCACCAATGCCAGTCTTC_4	1.62923836155468	0.000388908283711353
GAACATCGTTGGTGAGACCGCATA_4	2.25189195872306	-0.0940474
ATGCACGATACCAGGATTCAGCCT_4	1.66563360913055	0.138501473992406
CGTGTGTAGCCATAACTAGCCGAA_4	2.14232067075299	-0.0328234
GTCGAAGAAAGGACACACAGCAAC_4	1.91824923160512	0.0924513160020122
CATACCACGAACGCTTACGGTCTT_4	2.05542426838128	0.0181490846967325
TACGCTACAGGTTCGAACAGCAAC_4	2.39647893761654	-0.109732
TCAGGCTTTGATCGGAAGCAGATG_4	1.9203012947859	-0.0248609
TAACCGGTTACCAGGACGTAGGTT_4	2.11460038285594	-0.0308586
AGAACGAGGTCGGTAAAGGCATAG_4	1.91003051398261	0.0802770652878616
CTTAGGACGACGAATGCATAACGG_4	2.53169872850753	-0.00939358
TTCCAAGGAATGCCTCGCTTAGCT_4	1.6876771066282	0.166225308869628
TACGCTACTACGGTTGATGGAAGG_4	2.39390048244864	-0.0188219
GCACAACTTGGAGAGTTGCACCAA_4	2.57878359526046	-0.0504251
[truncated: 1,168 more rows]

## Sheet: 4-L5D5
	Ribosome and fiborin genes	Hippo_signaling_pathway
AACTGAGCCAATCGACCTCAGCTA_8	0.529663022131724	0.0727530674923589
ACTCTCGAACGATGACGAGCTCAA_8	0.883947389978984	0.170014655149581
ATCCGGTATGCCATTCTGCGTAGA_8	0.663976385920501	0.00315981004072172
ATGACGTCTTGATCCGTGGTCCTT_8	0.687743145151911	0.0640924405851334
CATGGCTAACGATGACAAGAGCCA_8	0.607971884459242	-0.031711
CTGATCGTTTGGTCTCCGGAATAC_8	0.688919793036296	0.0166379281832923
GTCGAAGAACTCGTTGCGATGCTT_8	0.820482224786338	0.00303178212602005
GTTGACCTGAATCGTGGCTTAGCT_8	0.517682206504515	0.072205729761626
TATCGGTCCGTACGAAGCAATTCG_8	0.713138055099348	0.0778443960513311
ACAGCTCAGACTTAGGGCTTAGCT_8	0.845698449217122	0.0344359293429941
ATGACGTCCCTACTGAGCTGTTGT_8	0.496354168193143	-0.054954
GCAAGATCACATTGCGACCATGTG_8	0.479382709726519	0.0920941418631914
GTGCCATAGAACGCTTTCTGAGAG_8	0.778626490716311	0.0688554214783543
GCACAACTGATACTGGAAGGCTGA_8	0.405942993929231	-0.0389281
AACTGAGCACTCGTTGCCTTCCTT_8	0.515956706388936	0.140229596516824
GCAAGATCAGTGCAGTTGGTCCTT_8	0.875158563448741	0.155447067513097
TGCTTCCACTTGCTGTCACCACTA_8	0.518043079888212	0.0101490295613331
CCTTGATCTCTAACGCAAGAGCCA_8	0.438699670823193	-0.0558123
CGGTTGTTTTACCGAGTGCCTCTT_8	0.834177192587188	0.0114473682092657
GCGTCATTTGCAGGTATATCAGCG_8	1.08915295521734	-0.0382685
TTGCAGACGTCGGTAACTCAGCTA_8	0.62667107094664	0.0206970789972236
AACTGAGCCTGGAGTAGTCTAGGT_8	0.514953583887203	0.0196363910049492
ACGTTCAGGTATGCTGTCCGAGTT_8	0.658977928649854	-0.0581573
ATCCAGAGACATTGCGACGTCGTA_8	0.753467466180694	0.0396214168280572
GTTCTCGTAGAAGCGTTTCTCTCG_8	0.452147097315469	-0.0996997
ATGCACGAATGGTTGCGCTTCGAA_8	0.781211695974317	-0.0498871
CATACCACACATTGCGCATCTACG_8	0.742306172954882	0.0693350242746232
CATGGCTATACATCGGTTACGGCT_8	1.08603731912576	0.00574135956785608
CCGTAAGACGACCATTTGCGTAGA_8	0.9743124309822	0.00782088019288903
GCTATCCTCCAAGTTGGATTGGAG_8	0.600017900533925	-0.0377001
TATCGGTCCAGTTCTGTCACGTTC_8	0.895264870446784	0.0755889475187919
ACGGAACAACGTGATGGTGTTCCT_8	0.403960733022786	0.131100753238156
ATCCAGAGGCTCTGTATGCCTCTT_8	0.789599987768805	0.131553349849284
ATCCAGAGGTATGCTGGTAGCATC_8	0.557502869182642	0.0116290264820211
CGTGTGTACTGACACAAACTGGTG_8	1.31817989729492	0.0213822487115914
CGTGTGTATGGAGTTGTTCAGCCT_8	0.691836773348388	-0.0482709
TGTGACTGGATACTGGCCTTCCTT_8	0.826144738033621	0.0113824896620238
TTCGTTGGGCTCTGTACAAGGTCT_8	0.504634784621583	-0.0365663
CATGGCTAATTCGAGGCAAGCAGT_8	0.3430115367255	0.0781678139608353
CGCATGATGAGATACGTACACGCT_8	0.608834184968774	-0.105986
GTTGACCTATTCGAGGGACAAGAG_8	0.667775736661908	0.14070870434375
TCAGGCTTCTTGCTGTTCTCCGAT_8	0.61489863526123	0.0282011884207311
TCAGGCTTGCCTTGTTTTGACAGG_8	0.925165847302246	-0.0386518
AGTTCGTCTAGTTGCGACCATGTG_8	0.833658649850147	-0.000514519
ATATGCGCAGTCGACAGTAGCATC_8	0.595017361797638	0.0697211061113109
ATATGCGCAGTCGACATACACGCT_8	0.57440946774879	0.019342351120796
ATGCACGAACCTAAGGTCGTAGTC_8	0.653406288028759	-0.0339583
CATGGCTAGCTGGATTACCGCATA_8	0.74165834871427	0.000851517247822356
CGCAATCTGAGATACGTCTGAGAG_8	0.698713738411361	-0.0480819
GAGCAGTATCTCTAGGGTTCATGG_8	0.778247469184766	0.118760277563243
AACCGTTCCAACCTAGTCTGAGAG_8	0.642871506193992	-0.0325525
GAACATCGGCCTTGTTCAGCGATT_8	0.678473569371891	-0.104482
GTTCTCGTCATTGCCTTTAGGTCG_8	0.660744531239995	-0.047281
AACGTCTGGACGAATGGACAAGAG_8	1.00316986821941	-0.107779
AACTGAGCATCGGTGTACCATGTG_8	0.739798317803109	0.00651796849190364
AACTGAGCGAGATACGACCTTCTC_8	0.666359344558479	0.0165395168766786
AACTGAGCTCGAACCATCTCCGAT_8	0.535451691999753	0.0672529272095669
ACGTTCAGCAATCGACCGGAATAC_8	0.368254163901771	-0.0988558
CCTGATTGGAATCGTGGCTGTTGT_8	1.07331605786045	0.080384078240121
GACGATCTCTCAGAGTGTCTAGGT_8	0.941724045406433	-0.109857
GATTGCTCTGGAGTTGTCGTAGTC_8	0.806275686208915	0.0545801361613665
ATGACGTCGAGATGTCCAGGTATC_8	1.21986770792294	0.0026176457953177
GAATCCGAGAATCGTGCAGGTATC_8	1.27588047567597	-0.051422
GCTATCCTAGCTCCTACGATGCTT_8	0.787284340343922	0.0211099973219846
GTTCTCGTTCGAACCACGGAATAC_8	0.717515447622465	0.0318725485383552
TGAGCTAGTCTAACGCGCTTCGAA_8	0.59846819558622	0.00825924964592757
ATCGATCGACCTAAGGCTGGTTCT_8	0.763949345872359	0.0675249195600213
CCTTGATCCCAAGTTGGAGCTCAA_8	0.619907011051427	0.116794640866425
CGCATGATGCTCTGTACTCTGGTT_8	0.532538714163423	0.142592132870437
GTTGACCTTACATCGGCAGGTATC_8	1.14919916414132	-0.118397
CATGGCTAATTCGAGGGTGTTCCT_8	0.458935397986437	0.164255971147366
GTCGAAGAAGTCGACACATGGAAC_8	1.02031760317636	0.0103858866618707
ACTCCATCAAGGACACTGCGTAGA_8	0.316133838105889	0.0765811950056678
ACTCTCGACAGTTCTGGTATTGGC_8	0.531314066337398	-0.108055
AGAACGAGCTAGGTGACAGGTATC_8	0.463691556352324	0.112886905620487
ATGCCTGTCAGTTCTGCATAACGG_8	0.498176455596678	-0.00017531
CGCATGATCTATCGCACTGGTTCT_8	1.16501219688269	0.0175581696847566
CGGTTGTTACCAGCTTTCGACATC_8	0.506828285291594	-0.0451033
AACTGAGCGTCGGTAATTCAGCCT_8	0.796662867976045	0.00742425884485422
ACTGAGGTTGCCATTCCAGTCTTC_8	0.850577765498914	-0.00278495
CGACGTTAGAGGACTTACCTTCTC_8	0.707468779555612	0.019112997742404
GAATCCGACGAGACTATTAGGTCG_8	0.171791250937084	-0.105031
AACCGTTCTGATCGGATGCACCAA_8	0.792741058942882	0.0585998943491905
AACTGAGCAGAAGCGTCAGGTATC_8	0.608032234570907	-0.0726539
AAGCACTGAGAAGCGTTTACGGCT_8	0.249821357472731	0.00680916695416074
ACCACGATACCAGCTTCCATACGT_8	0.722055391981509	-0.0577089
CATGGCTAAGCTCCTAGCACGTAA_8	0.72586584715893	-0.0423079
GCTATCCTCGAGACTACGGAATAC_8	0.972294583738192	0.0130234394384732
GTGAAGTGTTACCGAGTCGACATC_8	0.962525089939839	0.157951018070778
AGCACTTCCCGACTATTTCTCTCG_8	0.83380950121153	0.128679146979851
TTCCAAGGTCTAACGCGCCAGTAT_8	0.596616802228249	-0.0564621
ACGGAACAAGGTTCGAGTAGCATC_8	0.737451714106365	0.0116562600007424
ATCGATCGCGTTATGCTGCCTCTT_8	0.855123827586005	0.0702525516828833
CGTTGCAAACCAATGCTCTGAGAG_8	0.499775575191437	0.105799259234813
AACCGTTCGATGCACTACATAGGC_8	0.658741334882525	-0.112702
ACGTTCAGCCAAGTTGATTCTGGC_8	1.5869667634536	0.00410910044101964
CATACCACAGAAGCGTCAGGTATC_8	0.899574767707416	0.0648140002709278
CGGTTGTTTGCCATTCTTCAGCCT_8	1.17302361637928	-0.0581794
AGTTCGTCCATTGCCTGTCTAGGT_8	0.860047622760072	0.00647048764421627
TGCTTCCAGAACGCTTCGAACTGT_8	0.925705238968557	0.155211835738998
TGCTTCCATGCCATTCCCATACGT_8	0.438542868535704	-0.0491869
CCTTGATCCAGAATCGCGTGTACT_8	0.934142332328897	-0.00211039
CGCTCTATGTATGCTGACCATGTG_8	0.679930500296596	-0.104808
GCAAGATCTTACCGAGTGCGTAGA_8	0.767163338312084	0.0121599780489178
TACGCCTTCAGAATCGGTTCATGG_8	0.428280131931917	0.177818846235955
AACTGAGCGACGAATGCATGGAAC_8	0.586661282475163	-0.109848
AGTTCGTCCTTGCTGTCAGCGATT_8	1.33161483061422	0.124787632015551
ATATGCGCTGGAGAGTGCAATTCG_8	1.03482669926287	-0.135205
CATGGCTATCGAAGGTGCAATTCG_8	1.02892383658512	0.0740673815727824
GATGTGTGCTATCGCAGTTCATGG_8	0.98329628304866	0.00650771443950926
GATTGCTCGTAGAGCACTGGTTCT_8	1.15167966229169	0.185461662048548
GTGCCATATCCGTATGAAGGCTGA_8	0.419072231407626	0.0681184009030233
ACCACGATAGGCTTCTCTGGTTCT_8	0.721103588430427	-0.0521679
ATATGCGCCATTCGGTAACTGGTG_8	0.910988239407524	-0.116715
CGCATGATAAGGACACCGAGTATG_8	0.648594841612047	0.0200143591660795
CGGCTAATTGAGGTGTCGTGTACT_8	1.05443396886071	0.000837849129303597
CTTAGGACAGTCGACATCGACATC_8	0.640734007086444	-0.0482337
GATCGAGTGTATGCTGTTCAGCCT_8	0.881582328496327	-0.106511
CTGTTGACGAAGAGGTGTGTTCCT_8	0.762916206422213	-0.060184
GATTGCTCCTCATTGCAACTGGTG_8	0.579679641263349	0.128626089785928
GTCATCGACGTCAATGCTTCGTTC_8	0.806952487982438	0.00805119733782739
TCAGGCTTTCTCTAGGGCTTCGAA_8	0.527755766522866	-0.0566114
AGAGTAGCTAAGTGGCCAGGTATC_8	0.79294206161159	0.0834336859567579
AGCGTGTTCAATCGACCCTTCCTT_8	0.726822032830315	-0.00319671
AGTTCGTCAGGTTCGACGTGTACT_8	0.746166578608153	0.138394272681167
CTTGTCGAAATGCCTCCTCAGCTA_8	0.563146927217303	-0.00407793
GTGCCATATCCGTATGACCTTCTC_8	0.944104039139154	-0.040536
AAGCACTGCGTTATGCGATCGTAC_8	0.369131716709014	0.116730366456988
AGAGTAGCGACGAATGAGTCAGGA_8	0.890487261525981	-0.113103
TATCGGTCTGGAGTTGTGCGTAGA_8	0.386587494216344	0.000719226187933839
TGAGCTAGGTCTCCTTTTCAGCCT_8	1.02102894364461	-0.0439505
AGCACTTCACCAATGCTCCGAGTT_8	0.614533408617889	0.0165803029450955
AGTTCGTCCTTGCTGTATGGAAGG_8	1.18554374170191	0.0777405845598959
CATGGCTAGCCTTGTTCTTCACCA_8	0.799813326708528	0.127938042390536
GTGCCATATTGGTCTCGATTGGAG_8	0.493144539987805	0.169746637191118
TACGCCTTTCGAAGGTTCGTAGTC_8	0.43370142713601	0.0204156537024
AGTTCGTCACCAGCTTCCATACGT_8	0.890469692540261	0.00633720710342152
TACGCCTTTCTCGCAAGCATACAG_8	0.723189842751735	-0.0495356
TGCTTCCAAGGAGGAATCTGCTCT_8	0.560291738331809	-0.1122
ACAGCTCAGTATGCTGAAGAGCCA_8	0.823018715992903	0.0145992999438203
ACCACGATGACGAATGTGCCTCTT_8	0.447657184502315	0.0584696247415096
ACTCTCGAAGGTTCGACTACAGTG_8	0.421485251557326	-0.0501009
AGCGTGTTTTCAGGAGGTATTGGC_8	1.43863	-0.0376844
CTTAGGACCTCAGAGTCCTTCCTT_8	0.870357081081692	0.0102376421353049
GCGTCATTTCGAAGGTCGATGCTT_8	0.617637968819309	-0.121773
ATGACGTCTGTGCGTTCTTCGTTC_8	0.641074375917667	-0.0621962
ACAGCTCAAGAAGCGTTCCGAGTT_8	1.22855561360955	-0.112088
ACGGAACAGTATGCTGCCTTCCTT_8	0.429803509114508	-0.114141
ACTCCATCCGTCAATGCCAGTGTT_8	0.712532375475602	-0.105618
CGTGTGTATCTAACGCCAAGTGCA_8	1.05595758638273	-0.0560816
GTTGACCTGTAGAGCACAGGTATC_8	0.964411279815136	0.131380037075394
TACGCCTTGAATCGTGTGCGTAGA_8	0.746704450742533	0.0600289904560296
ATATGCGCATGGTTGCTCCGAGTT_8	0.944749635235014	0.004207243490412
CATGGCTATTACCGAGGACAAGAG_8	0.650614541835819	-0.0559775
CCTTGATCGAAGAGGTACTGTGTC_8	0.657373170117137	0.0795065628754829
GATTGCTCCGACCATTAACCGAAG_8	0.335731045989059	0.182998500011607
GTGAAGTGTAGTTGCGTTACGGCT_8	0.49132262025757	0.00229013645705597
TACGCCTTTTGATCCGACTGTGTC_8	0.762532311346184	0.0554786314717407
TTGCGAAGCTGGAGTAGTCTAGGT_8	0.539738714714308	0.00228555698151638
CTGATCGTCATTGCCTTTCTCTCG_8	0.912295941458983	0.0625034175435845
GATCGAGTTTGGTGAGTTCTCTCG_8	1.64042864860056	0.0138693343786856
GATTGCTCGATAGCGACATAACGG_8	0.690761922414531	-0.0515809
TGAGCTAGGTAGAGCAACATAGGC_8	1.03752132464632	0.114926259247861
TGGTACAGAATGGACGGTCTAGGT_8	0.432369612122739	-0.0950732
ACAGCTCAGTCCTAAGAACTGGTG_8	0.794347989870142	-0.113077
ACTCCATCGAATCGTGCGTAGGTT_8	0.848039668206301	0.0144018001114359
AGAACGAGTCGAAGGTCATAACGG_8	1.04668627218725	-0.0601659
ATCCAGAGGCCTTGTTCTAACTCG_8	0.660545560355014	0.133451202546415
CGCTCTATTGGAGAGTCTACAGTG_8	1.05679050013987	-0.116757
CTGATCGTACCAATGCCAAGCAGT_8	0.547482710298255	-0.108191
GCGTCATTCTTACAGCCTAACTCG_8	0.712286093254913	0.00425000951338404
GTGAAGTGACGTGATGTACACGCT_8	0.573948553934795	-0.00247504
AACTGAGCCCTACTGAACCGCATA_8	0.960356648113833	0.0583641887627741
CGCTCTATTGCAGGTACTCTGGTT_8	0.854234936499132	-0.115836
GAGCAGTATCTCGCAATGCCTCTT_8	0.678036211498793	0.0643829443115656
ACAGCTCAACCAATGCACCTTCTC_8	0.748974079171635	0.025638260861414
ACTCTCGACATTGCCTAAGAGCCA_8	0.634575654004104	-0.108246
AGAACGAGTCTCGCAAAACCGAAG_8	0.319862860045571	0.0663373383216724
GACGATCTGAAGAGGTTCGACATC_8	0.909889575873617	-0.0604685
GCGTCATTGTCTCCTTTCGACATC_8	0.555279067863229	-0.109265
AGAGTAGCTTACCGAGATTCTGGC_8	0.648342569257652	-0.0536803
CGGTTGTTCACAAGTCGTCTAGGT_8	0.814374834839203	0.00747009693706958
ATCGATCGCTATCGCACGTAGGTT_8	1.02642679282885	0.0689110864027882
CACTAGCTAGGCTTCTAACCTTGG_8	0.40965059959232	-0.0562608
CGTGTGTAAAGGACACCCTTCCTT_8	1.80132496264448	0.0142221094846923
TGAAGACGGAACGCTTCAAGGTCT_8	0.863995583358501	-0.0610507
AACTGAGCGTCCTAAGCTCAGCTA_8	0.613078761827694	-0.105538
AGTTCGTCCAGTTCTGCTGGTTCT_8	0.79822547048048	-0.0562047
ATCGATCGCGAGACTATCTGCTCT_8	0.473572081057495	0.00181614300309421
CATACCACGTAGAGCAACCGCATA_8	0.923758633452514	0.0647330508831664
CGCTCTATTACCAGGACCTTCCTT_8	0.590911361726072	0.0539393110828152
CGGTTGTTGCTGGATTCCATACGT_8	0.747903980273879	0.102813494242293
CTTGTCGAAGTCGACACACTGACA_8	2.41175308619954	-0.0914425
GAACATCGGTCTGATCAGTCAGGA_8	1.76763241730278	0.0360667712445358
ATCGATCGGATACTGGCTTCGTTC_8	0.623789165434848	-0.06054
CTTAGGACGATACTGGTGCCTCTT_8	0.749365874364111	0.145964563898571
GATCGAGTAGTCTGTGGTCTAGGT_8	0.52866038063351	0.0894072463977195
GATCGAGTGAGATACGTGCGTAGA_8	0.636474824863133	0.00650250305487805
GCACAACTGTATGCTGGATTGGAG_8	1.14645751724029	-0.0548396
GCTATCCTGTATGCTGAGGTCACT_8	1.3171930474026	-0.0027343
GTGAAGTGCCTACTGAAACCTTGG_8	0.872478149951622	0.0761322467408648
ACGGAACAAGGTTCGACAGGTATC_8	0.816256312392757	0.0768945649845102
CAGTCCAAAAGGACACCATCTACG_8	1.30181480420427	0.035676806549572
GTCATCGAGACTTAGGCTAACTCG_8	1.05458755146761	-0.0532215
TGGTACAGGCCATAACTAGGATGC_8	0.723403288382754	-0.0572708
ATCGCCATTGGAGTTGAACCTTGG_8	0.569952601834644	-0.055251
CGTGTGTACGTTATGCAGGATCTG_8	0.656326563149132	-0.0955403
GATGTGTGAGTGCAGTCCTTCCTT_8	0.625088660471778	0.0214714559311024
GTTCTCGTGACTTAGGCAGCGATT_8	0.546219792479963	0.0694044828291752
TGCTTCCAAAGGACACCATAACGG_8	0.622489405998709	0.143684387830644
TGCTTCCAGTCTCCTTTGCCTCTT_8	0.445369653363145	0.126643360425522
ACTAGGAGAGGTTCGATCTGCTCT_8	0.850788647457995	-0.0647714
ACTGAGGTGAGATACGTCGAGTGA_8	1.24585101801681	0.122306902588169
ATCGCCATAATGCCTCTCTGAGAG_8	1.11213974569258	0.0100051188432981
GAGCAGTATCGAACCAGTGTTCCT_8	0.668253951305309	0.00221213817886055
GATGTGTGTGGAGTTGGCTGTTGT_8	1.30742346727036	-0.0565825
TGAGCTAGGTAGAGCATCCGAGTT_8	0.545432143385367	-0.0498021
TTGGACGTTCCGTATGCAGTCTTC_8	0.896464561890813	0.18889119906226
ACAGCTCATACGGTTGGATCGTAC_8	0.528420564729562	-0.0579673
ACTGAGGTGTAGAGCACCTTCCTT_8	0.481283694634322	0.0302912923655291
CGTGTGTAAAGGACACCACTGACA_8	0.577363630092169	0.238563808034468
TGCTTCCAGAAGAGGTGCACGTAA_8	0.470406675971573	0.102942715979198
ACTCTCGAAGCTCCTACTCTGGTT_8	0.468331301103658	0.000572783141854272
CCTTGATCGCCTTGTTTCTGCTCT_8	0.612832183516808	0.00545193418651894
CGGCTAATCGAGACTAAGGATGGT_8	1.22490786465657	-0.0496559
GATCGAGTGCTGGATTATTCTGGC_8	1.87890893427782	0.100585499774209
TGCTTCCAAGCTCCTATTCTCTCG_8	1.12893880216448	0.0635096194036484
TGCTTCCAGATACTGGTTAGGTCG_8	0.757687072919563	-0.028894
ATCGATCGAGTCTGTGTCACGTTC_8	0.936915695204774	0.207493913696548
CGCTCTATACCAGCTTACCGCATA_8	0.35854943554949	0.0799282051076135
TGCTTCCAGACTTAGGGATCGTAC_8	0.762855151258916	0.00351964150029699
AACCGTTCTACCAGGACGTGTACT_8	0.703146181757806	0.179172643468477
ATCGATCGGATGCACTTACACGCT_8	0.58670377212485	-0.000785637
GTAGGAGTGAGATACGTTCAGCCT_8	0.596159663552577	-0.0262617
ACCACGATGAATCGTGTTCAGCCT_8	0.561313509801198	0.11477249467945
ATGCACGAACCAATGCCTGGTTCT_8	0.642725647565735	-0.0660817
ATGCCTGTCGTCAATGCTGGTTCT_8	0.720471970367652	0.0158061466740477
ACGTTCAGCGTTATGCAACGGTCA_8	0.879291530010288	-0.00531624
AGAACGAGCGCTAGTACAAGGTCT_8	0.446020160194265	0.00188594455699115
AGTTCGTCCATTCGGTGCGTTCTA_8	0.532916894173243	0.14396401725743
GAACATCGGACTTAGGACCGCATA_8	0.709431823403102	-0.0499925
TCAGGCTTGAGGACTTTGCCTCTT_8	0.809592577351617	0.0140853584567795
TGAGCTAGTAGTTGCGAGCAGATG_8	1.09010663431486	0.0554464981416877
ACTGAGGTACCAGCTTGTCTAGGT_8	0.915140076722119	-0.051997
ATGCACGAGATACTGGAACCGAAG_8	0.579910363577234	-0.0599909
CGCAATCTCTTGCTGTCATAACGG_8	0.966317780322132	-0.0492694
CGCTCTATCGCTAGTATCTGCTCT_8	0.993645179516552	-0.103983
GACGATCTCGACCATTTCTGAGAG_8	0.75418869041514	0.0965287824801586
AACCGTTCGACGAATGAACGGTCA_8	0.747118945527319	0.00583005796976949
ACGTTCAGGAAGAGGTAGCAGATG_8	0.581578117030078	0.0692473275465343
ATCCAGAGTACATCGGCTACAGTG_8	0.764967987824645	0.0242324242456538
ATGCACGACTAGGTGACTTCGTTC_8	0.849553510742294	0.00483154270347927
ATGCACGAGCTGGATTATGGAAGG_8	0.779279618520154	0.0559634495673444
AACTGAGCAGGTTCGAACCTTCTC_8	1.12244326728997	-0.1042
ACTGAGGTACCAATGCCGAGTATG_8	0.728780855844146	-0.0519393
CTGATCGTTCTCGCAATGTGGTAC_8	0.604890400477747	-0.0508257
TATCGGTCTACATCGGTTGTCGGT_8	0.784155948058452	0.0881099253711613
AACGTCTGAGTGCAGTCATCTACG_8	0.758333615305308	0.00623963941031784
AGAACGAGGCCTTGTTATTCTGGC_8	0.985994757851797	0.068712468645013
GTCGAAGATCCGTATGCCATACGT_8	0.656720739926698	0.112747975336808
TGCTTCCAGCCATAACACCTTCTC_8	0.516468886892882	-0.0565585
ATCCAGAGAGAAGCGTTTACGGCT_8	0.850843503292674	-0.0592363
CCTGATTGGATGCACTTTAGGTCG_8	1.02867973945987	-0.0485584
AGAGTAGCCGGATTGACGTAGGTT_8	1.04516882692506	0.000940223826051162
ATATGCGCACCTAAGGTGGTCCTT_8	0.459129621962631	-0.121177
CATGGCTACCAAGTTGGCACGTAA_8	0.922256731401357	-0.0077172
CATGGCTACTTACAGCTTCTCTCG_8	0.705185198093135	-0.00510398
CGTGTGTACGACCATTCGAACTGT_8	0.929323632389271	-0.0459725
GAGCAGTATCGAAGGTTCGAGTGA_8	0.734394668208523	-0.0649687
TCAGGCTTCATTCGGTACCTTCTC_8	0.669159996560851	-0.0118088
AACCGTTCGTCAGTTGCAGCGATT_8	0.865638466478748	-0.04618
GAATCCGAAGTCTGTGTCGACATC_8	0.68698501973057	-0.0020704
GATAGGCTTCTAACGCCAGCGATT_8	1.36339570110041	-0.0761733
GATCGAGTACGATGACTGGTCCTT_8	0.857934005284211	-0.053889
GCGTCATTATTCGAGGCTACAGTG_8	0.826194285876937	0.00106340430241512
AACCGTTCTGGAGTTGTTACGGCT_8	0.905657772934134	0.00179431678451064
AGAACGAGATGGTTGCCTAACTCG_8	0.798706963112937	-0.0521128
ATATGCGCTCGAAGGTAACTGGTG_8	0.646828524541293	0.0514112128552167
CTGATCGTGTCCTAAGTCCGAGTT_8	0.973628697865004	-0.120612
GTTCTCGTTTGGTCTCTAGCCGAA_8	0.341261644076123	0.0528138362004097
AGCGTGTTCAGAATCGCAGGTATC_8	0.845790157107055	0.0682225625468239
CTGATCGTCTCTACTCGCTTCGAA_8	0.978486897517934	0.24599907344234
GTGCCATACTCTACTCGCAATTCG_8	1.02377638086555	-0.0495452
AACTGAGCACCAATGCAGGATGGT_8	0.877932690519559	-0.00108034
GCAAGATCACCTAAGGCGAACTGT_8	0.316063764537967	-0.00547149
CATGGCTATTGATCCGCGAACTGT_8	0.665975835329732	0.00259741014814519
CCTTGATCCTCAGAGTCACCACTA_8	0.5669883872734	-0.103157
CCTTGATCGTCTGATCCGAACTGT_8	1.49306796381106	-0.0469989
TATCGGTCGAAGAGGTTCTGAGAG_8	1.21937510974896	0.0572648728895717
CCTGATTGTGTGAAGCGATTGGAG_8	1.27615732010854	-0.118787
CGCTCTATTAGTTGCGGCTTAGCT_8	0.738974009163954	-0.002194
GAGCAGTATTGGTCTCCGAACTGT_8	0.633505309065063	-0.0586179
ATCGATCGCGTCAATGTCAGACGA_8	0.429458598311508	-0.0583426
CATGGCTAAGGCTTCTCGAGTATG_8	0.304006626488593	0.0204085559161784
CCTGATTGAGTCTGTGTGCCTCTT_8	0.526240785005054	-0.00403149
GATTACCGGCCTTGTTACTGTGTC_8	0.621611274693179	0.0579960121311037
GTGAAGTGAGGTTCGACATAACGG_8	1.07592	0.128337129550841
GTGCCATATCTCTAGGACCGCATA_8	0.47894042268122	-0.116568
GTTGACCTCGGATTGATAGCCGAA_8	0.428981196376226	-0.0633537
TGTGACTGCCGACTATTCCGAGTT_8	0.460836079471513	0.0579097930674124
ACTCTCGATTGGTCTCTCGAGTGA_8	0.854060421879514	0.00853524844584558
GTTGTTCGAGTCGACACTTCACCA_8	0.949419682639191	-0.0478523
GTTGTTCGGAGATGTCGCGTTCTA_8	0.673841337753406	-0.0059438
TTCGTTGGACGATGACCATCTACG_8	0.729935639967403	-0.117563
AACCGTTCCGGATTGAACCTTCTC_8	0.675157583023932	-0.00161872
AACGTCTGCTGGAGTATAGGATGC_8	0.95989389170321	-0.0520549
ATCCAGAGGTCGGTAAGCAATTCG_8	0.814171021855057	-0.0139114
GAAGTTGGAGTCGACACGATGCTT_8	0.373142630162223	0.0181083720182932
TCAGGCTTCCAAGTTGTGCCTCTT_8	0.86404368944194	0.0614729009324078
ATCGATCGGTCAGTTGTCTGCTCT_8	1.02430379362992	0.052207899588648
ATCGATCGTACATCGGTCAGACGA_8	0.884793205192296	0.115745092688312
CGCATGATAGGCTTCTACATAGGC_8	0.881209480580906	0.111367182446139
GATTGCTCAGGCTTCTTGTGGTAC_8	0.923939839542407	0.0693989503555918
AGAACGAGTTGGTCTCTCCGAGTT_8	0.637617283838327	0.0561103004724488
CCGTAAGAGCCTTGTTCCATACGT_8	0.907206387691876	-0.0460796
CTTGTCGAACGATGACCGTAGGTT_8	0.698154647983197	-0.0645847
GTGAAGTGCGTTATGCTTGTCGGT_8	0.589725100878246	-0.100346
CCTTGTAGAGGCTTCTTACACGCT_8	0.743133810500844	-0.110931
TATCGGTCAGTCGACACAGTCTTC_8	0.996437394645443	0.110546893489536
ACTCTCGATGTGCGTTCATAACGG_8	0.75993564774005	-0.0595795
ATATGCGCTGGAGTTGCTCAGCTA_8	0.699069889708563	0.0159729341344571
TGCTTCCACTAGGTGACAGCGATT_8	0.985515922483172	0.0135229178151726
ACTCCATCTCTCTAGGTGTGGTAC_8	0.740113554813052	0.0390184759665411
GTCGAAGAAGTGCAGTATGGAAGG_8	0.554089979957503	0.146021325309177
AGAACGAGAGTCGACAAACCTTGG_8	0.58436799176262	0.000882214019394492
CATGGCTAAGCTCCTACGAGTATG_8	0.459197711216358	-0.0642784
TACGCTACTACATCGGCACCACTA_8	0.645012992628345	-0.0530704
ATATGCGCCTTACAGCTCGTAGTC_8	0.795522594091003	-0.0518243
GATTGCTCCGTACGAACGATGCTT_8	0.337123052644959	0.145190925366985
AGAGTAGCGTATGCTGCATAACGG_8	0.911530374801669	0.0529968257951787
ATATGCGCGTAGAGCATAGCCGAA_8	0.881705045150578	0.10186198582278
GTGAAGTGCTATCGCACTGCGTAT_8	0.990703812700259	-0.0641696
TTCCAAGGCACAAGTCAACTGGTG_8	0.587667015707384	0.0364955332303557
ATCGATCGGAGATACGCTCTGGTT_8	0.640932066125201	-0.0537489
AACTGAGCAAGGACACGCTTCGAA_8	0.787165325674298	0.00443189339749613
ATCGATCGCGTTATGCCTCTGGTT_8	0.914879277294807	0.0683934888687265
CGTGTGTAAATGCCTCGCCAGTAT_8	0.864956832049074	-0.0624128
GAAGTTGGGTCCTAAGGCAATTCG_8	0.818592391229962	-0.054619
GCGTCATTTCGAACCAACCATGTG_8	0.687708280905273	-0.0554177
GTGAAGTGTACGGTTGGATTGGAG_8	0.52623711432278	-0.120883
GTTACGCATACCAGGAAGGTCACT_8	0.687911890262652	-0.122082
TGGACTCTGAAGAGGTGTATTGGC_8	1.14832796605225	-0.0706524
AACCGTTCGACTTAGGTCAGACGA_8	0.703129546446269	-0.00771169
CAACACCTTTCAGGAGCTGGTTCT_8	0.364786420847527	-0.0454585
ACTCCATCAGTCGACAACGTCGTA_8	0.752603568539265	-0.0490362
AGCACTTCTGCAGGTAACCATGTG_8	0.814601831312287	0.00904789084493218
ATCGATCGACCAGCTTACTGCTAG_8	0.390467670914207	0.16076938244192
ATCGATCGTGTGCGTTCTCAGCTA_8	0.738526883690887	-0.126274
ATGACGTCGTCCTAAGGCTTCGAA_8	0.907449224066828	-0.0422917
CGCTCTATACGATGACTGCCTCTT_8	0.366634554899853	0.0166236368030474
GTGAAGTGTAGTTGCGTGCCTCTT_8	0.744435389516071	-0.00292275
AACTGAGCCGTCAATGGCTTCTTG_8	0.967243219803808	-0.0463018
AAGCACTGCGTCAATGTTACGGCT_8	0.695863644726011	-0.1113
CACCTGTTCTCTACTCCTACAGTG_8	0.517192265706705	-0.112959
ACTCCATCTTCAGGAGTGGTCCTT_8	0.925956315288241	-0.0136527
GTTCTCGTTACATCGGTCTCCGAT_8	0.54169234847117	-0.108864
ACTCTCGACCAAGTTGCAGCGATT_8	0.804943631909108	-0.121221
ACTCTCGAGCTCTGTATCTGAGAG_8	0.496978846836679	-0.0627692
ATGCACGAGCTCTGTAACTGTGTC_8	0.793387369304566	0.0646825428463615
CGGTTGTTAATGCCTCACATAGGC_8	0.697374635493033	-0.120374
CTTAGGACCTGACACATGCCTCTT_8	0.865162634535735	-0.00820033
ACGGAACAGTATGCTGTTCAGCCT_8	1.03972164757908	-0.122453
CCTTGATCTGCCATTCTCCGAGTT_8	0.942822130061114	-0.0540709
GTAGGAGTTCCGTATGACCATGTG_8	0.922743022505058	-0.000362732
AGTTCGTCGTATGCTGAACCTTGG_8	0.496408654714657	-0.0488024
TACGCCTTGACTATGCACTGCTAG_8	0.998909323559918	0.0679559329681906
TGCTTCCAGTAGAGCATTGTCGGT_8	0.706463291401442	0.028490880158442
ATGACGTCTACATCGGCGATGCTT_8	0.611159951670704	-0.00389838
TACGCCTTTAGTTGCGGATTGGAG_8	1.08115167025405	0.0734328108314474
TTCGTTGGACTCGTTGACCGCATA_8	1.23865250740686	0.0224296120309501
CATACCACTCTCGCAAACCTTCTC_8	0.779780649055545	0.00831531088690084
CTTCGACTAGTCGACACGAGTATG_8	0.591913295320766	-0.067644
ACTCTCGATAGTTGCGAACCTTGG_8	0.866061871711049	0.0562870622073451
ATCGATCGGTATGCTGCGTAGGTT_8	0.606543023010166	0.113398128802175
CATGGCTACAACCTAGTCCGAGTT_8	0.886115272635004	-0.0530643
GAGACGATGTCTGATCCCAGTGTT_8	0.739028456579994	-0.141041
GCTATCCTCCTACTGAGCCAGTAT_8	0.357106883158131	-0.0616169
TAACCGGTGAATCGTGGCACGTAA_8	1.4419749405212	-0.0507545
ACAGCTCAAATGGACGCGTGTACT_8	0.523887516026677	0.070979962527764
ACTCTCGATTCAGGAGACCATGTG_8	0.742646928002889	-0.0548354
AGCACTTCCCAAGTTGGCTTCTTG_8	0.593548144076469	0.184525597296462
GATTACCGCTCAGAGTTATCAGCG_8	0.752527801363439	-0.0506871
TCAGGCTTTTGGTCTCGTTCATGG_8	0.603178900470746	-0.00541977
ACAGCTCAACGTGATGAGGCATAG_8	0.860835289516788	-0.00058911
ACGTTCAGAGAAGCGTCACCACTA_8	0.908484618320854	-0.112134
ACTCCATCTGAGGTGTCTAACTCG_8	0.943646989089316	0.0648679403271577
ATGACGTCAATGGACGGCCAGTAT_8	0.894548610196435	-0.118721
AACGTCTGGTATGCTGCATCTACG_8	1.10057116539281	-0.011115
CGCATGATCACAAGTCGACAAGAG_8	0.895806322969761	0.0226366525906742
GAGACGATCGAGACTAGCTGTTGT_8	0.693409088945968	0.104616334615874
GTTCTCGTTTACCGAGCATAACGG_8	0.948150358608295	-0.128905
GTTGACCTCGAGACTACTACAGTG_8	0.98928278762417	0.0492046487857205
AACTGAGCCGCTAGTATCTCCGAT_8	1.08222244941944	-0.111113
CAATGTGGTCGAAGGTTGTCCAGA_8	1.12842770237718	-0.055471
GATTGCTCTACCAGGACACTGACA_8	0.847497045470237	0.152116662911396
TGTGACTGACTCGTTGGCATACAG_8	0.428238856090473	-0.0598949
GTCGAAGACCAAGTTGGAGCTCAA_8	0.952424604824852	0.109695947071319
TCAGGCTTGTCTGATCAACCTTGG_8	1.50665922330339	-0.0264468
AGAACGAGCTTGCTGTCTGGTTCT_8	0.791476311494925	-0.0624861
CATGGCTAACCAATGCCCTTCCTT_8	0.737096525589558	-0.00979814
GATAGGCTGAATCGTGCAAGGTCT_8	0.7567630108881	0.0574097145514495
GCTATCCTTCTCTAGGTCTGCTCT_8	1.34226265967359	-0.016843
GTTGACCTTGGAGTTGCAAGGTCT_8	0.902533228186149	0.0498874171794464
ACTCCATCTGTGCGTTCAAGTGCA_8	0.807008219239121	0.0455331463170048
GTGCCATATACATCGGTATCAGCG_8	0.579144647935201	-0.0516521
TATCGGTCAGCTCCTAGCCAGTAT_8	0.839309564322161	-0.0654724
CGTGTGTACTGACACAGCAATTCG_8	0.350164577141422	0.0592174913908399
CCTTGATCGATAGCGATGGTCCTT_8	0.863396266924122	0.10427806810894
TGCTTCCATCTAACGCAACCTCCT_8	0.482227850176537	0.162181820462591
CATGGCTATCTCGCAACAAGCAGT_8	0.529067887835309	0.158159669001594
GCAAGATCGTCAGTTGGCGTTCTA_8	0.367458362662486	-0.0499671
CAACACCTGTCCTAAGAACCTTGG_8	0.733092979816212	-0.0514443
CAATGTGGCGTCAATGGCCAGTAT_8	0.794496179336769	0.0927333580119097
ATCGCCATTCCGTATGCATAACGG_8	1.34695844440772	0.0439267524798393
ATGACGTCTCGAAGGTTAGCCGAA_8	0.723047701174082	0.0699563897478973
TCGCTGTTTCTCGCAACACTGACA_8	0.924232113103272	0.0580393507907106
TGTGACTGAGGTTCGACAAGCAGT_8	1.32490638670763	0.0972969258466022
ACTCTCGAGCCATAACTCGTGGAT_8	0.457438850081907	0.0491866163539263
ACTCCATCTTGGTCTCCTGCGTAT_8	0.375855155468963	0.177347954449057
ATCGATCGTGTGAAGCCTACAGTG_8	0.915147057997391	0.0476745448422277
CGCTCTATCTTGCTGTTTGACAGG_8	0.85834929243949	0.0607931517696201
TACGCCTTCCGACTATGCTTCGAA_8	0.857818001666701	-0.068629
TATCGGTCCTTACAGCACTGTGTC_8	1.14865425442292	-0.0126403
TGAGCTAGAAGGACACATTCTGGC_8	0.742264725788964	-0.0105658
ACTCCATCACTCGTTGTGCCTCTT_8	0.65885294881453	-0.0616006
AGAACGAGCGTCAATGACCGCATA_8	0.395353604865574	-0.00517021
CAATGTGGGTCTGATCGCACGTAA_8	0.802963004577121	-0.0598766
CGCATGATAAGGACACTCGTGGAT_8	1.0976902368343	-0.0612645
ACTCTCGAGTCCTAAGGATTGGAG_8	0.852734982841892	0.0051162116666504
CTGATCGTCGATAGAGCTCTGGTT_8	1.45673592585634	-0.104605
CTTGTCGATCTAACGCCATAACGG_8	0.344445041596606	-0.0494352
TACGCCTTCTCATTGCCGATGCTT_8	0.869835273314285	-0.0266561
ACTCTCGAAAGGACACCGTAGGTT_8	0.655299741759518	0.0505170574291886
ATGCACGAACGATGACCGAACTGT_8	0.691470541015269	-0.113963
GTCATCGATTCAGGAGACCATGTG_8	0.749386759413429	0.0414160709010383
TCAGGCTTGCTGGATTGCAATTCG_8	0.635003700714467	0.0536276017983801
ACTCTCGACGGATTGATTGACAGG_8	0.810658587168699	0.0729769297813012
GATTGCTCTAAGTGGCGCTTCGAA_8	0.922062816638249	-0.0105457
GTCATCGAAGTCGACACGAACTGT_8	0.853652763259927	0.101433678962251
ACTCCATCGTCGGTAACGAACTGT_8	0.747658576154156	0.111697858969058
AGTTCGTCGACTATGCCTCTGGTT_8	0.78634714927962	-0.0530899
ATCGATCGCATTCGGTTCTGCTCT_8	0.748359216747199	-0.00306164
CTGATCGTCGTTATGCAACGGTCA_8	1.28183901690123	-0.000348184
AACGTCTGAATGGACGTTCAGCCT_8	1.48476019606282	-0.0581629
CATGGCTAACCAGCTTCAGCGATT_8	1.02071439031994	-0.0474028
GAAGGAAGCGATAGAGTATCAGCG_8	0.9236662470844	-0.111987
GTGAAGTGGTAGAGCAACCTTCTC_8	0.910126661013699	-0.121725
ATCCGGTAGACTATGCAAGGCTGA_8	0.927651562358949	-0.0492704
CATGGCTACGTTATGCAACCTCCT_8	0.656389282292754	0.0663355173125051
CGGTTGTTGAAGAGGTTACACGCT_8	0.818331057520216	0.159309147235284
AACTGAGCGCCATAACGTTCATGG_8	0.541487485296751	-0.0173318
TTCCAAGGTCCGTATGTTCTCTCG_8	0.682466525734756	0.241048624868444
AGAACGAGCATTCGGTCTACAGTG_8	0.804624193101676	0.0489703026802739
GAAGGAAGTGAGGTGTGCCAGTAT_8	0.539480080953896	-0.00938702
GTTCTCGTCGCTAGTATGTGGTAC_8	0.976619579493629	-0.0735661
TTGGACGTGTCCTAAGCTCAGCTA_8	0.641344407630761	-0.0652793
ATGCCTGTTTACCGAGTAGGATGC_8	0.497072356396202	0.0460508779636887
AACGTCTGGAGGACTTAGCAGATG_8	1.33598048486428	0.0428978665260532
GATTGCTCGATGCACTGTTCATGG_8	0.901255861746772	-0.124336
CCGTAAGAGCCTTGTTCATGGAAC_8	0.580083882567974	0.0602810182069173
TCGCTGTTAAGGACACTCGAGTGA_8	0.635774922163496	-0.0650894
AACTGAGCCGCTAGTAGAGCTCAA_8	0.758977548131018	0.240155557727368
AGCGTGTTCCTACTGAGCTGTTGT_8	0.555445283457973	0.0575520596906653
ATGACGTCCTCAGAGTTAGCCGAA_8	0.850577974852469	-0.123329
CAATGTGGCATTCGGTGTGTTCCT_8	0.624367560360176	-0.0786568
CAATGTGGTAAGTGGCAGGATCTG_8	0.918986308567483	0.00478643976268035
CATACCACGATAGCGACTCTGGTT_8	0.742918261820575	0.0674286337070152
CTGATCGTTCTCTAGGACCTTCTC_8	0.8933783851969	0.0539818360863227
GTTCTCGTCCTACTGATTCTCTCG_8	1.24021516917729	-0.00451601
ATGACGTCTGCCATTCGCGTTCTA_8	0.630780131909222	-0.0535173
CTTCGACTCACAAGTCTCCGAGTT_8	1.74116878769781	0.00250952715165105
ATGCCTGTGAATCGTGCACTGACA_8	1.09702444320905	-0.0194692
GATTGCTCAATGGACGTCGTGGAT_8	0.80996700940253	-0.11856
TACGCCTTTTACCGAGTGTGGTAC_8	0.361880266584475	0.122351369911841
TTGGACGTATCGGTGTGCTTCTTG_8	1.07292827319082	0.0393697722847725
AAGCACTGGTATGCTGCCTTCCTT_8	0.914315452565021	0.00477601615001613
ACAGCTCATAAGTGGCTCTCCGAT_8	0.758441451550366	0.0533388548997741
AGTGGATCAGGCTTCTTCCGAGTT_8	1.08987485138921	0.0388265878053465
CGGTTGTTGACTATGCCATAACGG_8	1.06161609537725	-0.000574511
TGAAGACGCTAGGTGAGCGTTCTA_8	2.15734083112076	-0.111273
AGAGTAGCAGGAGGAACGATGCTT_8	0.648257308681967	0.0249072334253428
AGAGTAGCCTCAGAGTTGTCCAGA_8	1.19657345004617	-0.0500034
GAAGGAAGGTCGGTAAGTCTAGGT_8	0.674353335091607	-0.0696879
GCAAGATCCAATCGACACGGTCTT_8	0.825000149661979	0.0555587535411836
AAGCACTGGACGAATGGACAAGAG_8	0.310561996629641	0.0532681401183133
GTAGGAGTAATGCCTCTATCAGCG_8	0.621350000696859	-0.0760585
GTAGGAGTCCGACTATTTACGGCT_8	0.4205523894057	0.115755318309601
CTTAGGACCTATCGCACGTAGGTT_8	0.641834914928258	-0.124011
GCAAGATCCGATAGAGACGTCGTA_8	0.847631381709174	-0.0136803
TGCTTCCAGAATCGTGTGTGGTAC_8	1.00406961891955	0.0534971569739066
AACTGAGCGTCTCCTTCAGTCTTC_8	0.822037996845829	-0.0639358
ACTCTCGAATGGTTGCCAGTCTTC_8	0.501843452517251	-0.0696677
ACTCTCGACAGTTCTGAACGGTCA_8	0.690774998639338	0.114382464083604
ATCGCCATCAACCTAGTGCACCAA_8	0.68194594490438	0.202610916361847
ATGCACGACGATAGAGCGAACTGT_8	0.703207281347726	0.00642724884904811
TGAGCTAGGTAGAGCACGATGCTT_8	1.21024597872391	-0.0550357
ATGCACGAGTCTGATCTGCCTCTT_8	0.865446908976662	-0.00665258
CATACCACCATTGCCTTATCAGCG_8	0.702583163608536	-0.0617017
GATTGCTCCAATCGACGTTCATGG_8	0.484102507926681	0.138824545350312
ACGGAACATGCCATTCAGGATCTG_8	0.806178001151483	-0.116823
ACTGAGGTTTACCGAGCGGAATAC_8	0.956687073672999	0.0523561667607933
CATGGCTACTTGCTGTGACAAGAG_8	0.483275388416037	0.209727439502546
CCTTGATCCGTCAATGGCTTAGCT_8	1.03743935552381	-0.0641224
CCTTGATCGATAGCGAAACGGTCA_8	1.5206182387685	-0.0577112
CGACGTTATTGGTGAGTCCGAGTT_8	1.1875702458417	-0.124511
CGCATGATTAGTTGCGGCAATTCG_8	0.698980817498713	-0.125856
GACGATCTAAGGACACCTTCGTTC_8	0.473462968074456	-0.10808
TCAGGCTTTGTGCGTTCGTAGGTT_8	0.723590808096626	0.154429095543624
ACTCTCGAACCTAAGGAAGGCTGA_8	0.730573699988207	-0.00650264
AGAACGAGTACCAGGACAGGTATC_8	0.711488152524806	0.240211896629407
CCTTGATCTAAGTGGCCAGCGATT_8	0.538018005791719	-0.0117186
GCGTCATTAGTCTGTGCAAGCAGT_8	1.29332163836444	0.0897483490849115
ACAGCTCAGTCAGTTGAACCTCCT_8	1.10577523192325	0.0662475738174346
AGAACGAGCTAGGCATTCGTGGAT_8	0.667802287831363	0.218562774779512
CGACGTTATCGAACCAGTTCATGG_8	0.872984120245313	-0.010196
GTTGTTCGTCGAAGGTGCTTAGCT_8	0.461826378253832	-0.0606544
ACTAGGAGTTGATCCGCTTCACCA_8	0.650593194271387	-0.101042
ATCCGGTAATTCGAGGCATAACGG_8	0.884620251081133	0.0926333729805112
ACGTTCAGTGCCATTCGTGTTCCT_8	0.751233442535316	0.00157176962325166
AGAACGAGTAAGTGGCGCCAGTAT_8	0.630175995485662	-0.0633176
TGCTTCCACTGACACACTGCGTAT_8	0.816302606807771	-0.0666261
ACGACTTGGCTGGATTCATGGAAC_8	1.50332534214773	-0.0618002
CGCATGATACCAGCTTAACCTCCT_8	0.712613220405545	-0.00981353
GCAAGATCCGTTATGCGATCGTAC_8	0.821071304028717	-0.0197927
TACGCCTTAGGCTTCTTCTGCTCT_8	0.648447503915723	-0.0130735
TGCTTCCACTAGGCATAGGCATAG_8	0.999458209870428	-0.0162925
TGCTTCCACTTGCTGTCGAACTGT_8	0.895095480183177	0.0449824166102346
GTGAAGTGAGTCTGTGTTGACAGG_8	1.40716904692434	-0.0593464
AACTGAGCCTTACAGCGTGTTCCT_8	0.441177835077279	0.00116563182410424
CGTGTGTACTCATTGCCGTGTACT_8	0.550322609741741	-0.00343289
TGTGACTGTCGAACCACGAACTGT_8	1.24753105837262	-0.0143735
TTCCAAGGAGCTCCTAAGGCATAG_8	0.483063964517331	-0.138465
CGCTCTATCGAGACTAACCTTCTC_8	0.502378705806725	0.0548841469623427
AACTGAGCATGGTTGCTGCGTAGA_8	0.567590986354347	-0.0325672
ATATGCGCAGTCGACAGTTCATGG_8	1.01585789179132	-0.111424
CTGATCGTTACGGTTGCACTGACA_8	0.818208774671756	0.169718908018663
TCAGGCTTCATTGCCTCGTGTACT_8	0.88916172812774	0.109512972079457
AACTGAGCTGAGGTGTCTAACTCG_8	0.748616660780956	-0.0205809
CATACCACTGAGGTGTTGCCTCTT_8	0.692878199477411	-0.0755597
GCAAGATCGCCATAACATTCTGGC_8	0.634382764462335	0.10265107214927
AACTGAGCGAGATACGCTTCGTTC_8	0.753992228940995	0.0469517658360938
AGCACTTCTTGATCCGACAGCAAC_8	0.741754496950908	-0.0672393
GTTGTTCGTGTGCGTTTCTGAGAG_8	0.840145052882973	-0.070362
ATCCAGAGCCGACTATAGGATGGT_8	0.835937436043702	-0.137229
ATGACGTCTCGAAGGTGACAAGAG_8	0.684280364202355	0.0561063775559381
GATGTGTGGAACGCTTGCTTCTTG_8	0.775366288012415	0.103324201171996
TTCGTTGGAGGTTCGACTGGTTCT_8	0.781852275110118	0.150669580360919
AACTGAGCAATGGACGGTGTTCCT_8	0.799429760559228	-0.00848479
CAATGTGGCAGAATCGGCTTAGCT_8	0.971902618282089	0.0921828977773833
CCTGATTGCTAGGCATCAAGTGCA_8	1.06794809226855	-0.00750544
GATCGAGTTCTCGCAAACTGTGTC_8	0.942032997676807	0.0494958456737839
TTGCAGACGATACTGGGTTCATGG_8	1.27068966643015	0.0156138276203961
AACTGAGCACCTAAGGACGGTCTT_8	0.567860081282548	0.0943747089748464
AGTTCGTCCGAGACTATACACGCT_8	1.18695926959446	-0.0116997
CCTGATTGGTCCTAAGCACTGACA_8	0.918238508813752	0.0622009189785011
GTGAAGTGGAGATACGGAGCTCAA_8	0.512683621266489	-0.0588582
GTTGTTCGCAACCTAGGACAAGAG_8	0.893549218229141	0.0905965221464607
AGCACTTCACTCGTTGCACCACTA_8	0.746113986172571	0.0619804008879576
CGCATGATCAGTTCTGCATAACGG_8	0.62262621637067	-0.0855074
CATGGCTATGGAGTTGGTGTTCCT_8	1.00554019518647	-0.123238
CCTGATTGCAACCTAGCACTGACA_8	0.48180011984357	-0.074471
GTTCTCGTTCTAACGCCTACAGTG_8	1.26461612470133	-0.1242
TTCCAAGGTGATCGGATTCTCTCG_8	0.604951123998673	0.0580275640778635
CCTTGATCCCAAGTTGCTAACTCG_8	0.800124041603762	0.100638569262207
ATCGATCGCAATCGACGCTTCTTG_8	0.911060779807305	-0.014895
TCAGGCTTAGGCTTCTAACGGTCA_8	0.52179964650431	-0.0103668
TGAGCTAGGTCAGTTGCGAACTGT_8	1.02843624275471	0.0697611551202721
TGGCATGTAGAAGCGTTATCAGCG_8	0.737573416141187	0.125435079505891
CTGATCGTCCTACTGAGTTCATGG_8	0.617335939492123	0.149097406167683
GACGATCTAAGGACACGCAATTCG_8	0.845100343621879	-0.119895
ACTCCATCTCTAACGCAAGAGCCA_8	0.506986611571762	0.0701597394888909
GACGATCTGTAGAGCATGCCTCTT_8	0.943439588358105	-0.123141
TTCCAAGGGAGATACGCTCTGGTT_8	0.589884287540895	0.0418843270302565
AACTGAGCAGGAGGAACATCTACG_8	1.31834951372732	-0.0509224
GTCGAAGATCTCTAGGGCAATTCG_8	0.443514505808189	-0.0673907
CCTGATTGTGTGCGTTTTCTCTCG_8	0.476439265503199	-0.00214978
GTTGTTCGGAACGCTTGATTGGAG_8	0.510537538460286	-0.0540879
TGGACTCTACGTGATGTAGGATGC_8	0.458756821739889	-0.0759146
AACTGAGCGAGGACTTGCAATTCG_8	0.874800020454153	-0.0113051
AAGCACTGCAATCGACGTGTTCCT_8	0.434189653340625	-0.0483528
AGAACGAGAGTCTGTGTCAGACGA_8	0.955645186549121	0.0827827154626295
CACCTGTTTCGAAGGTTCCGAGTT_8	1.14183957969166	-0.0678918
CATACCACTCCGTATGCTGCGTAT_8	0.703131600424261	0.129453108113451
GTCATCGAGAATCGTGTCCGAGTT_8	1.07786247037098	0.0117024425952421
TCGCTGTTCTTACAGCGCTTCGAA_8	0.760856538245039	0.0297456526739066
ACGGAACAGCCTTGTTGCGTTCTA_8	0.956159348071186	0.0949551764574739
CCTGATTGACCTAAGGGCGTTCTA_8	1.20008779064348	0.0240745472279083
GTCGAAGAAGGCTTCTACCATGTG_8	0.586983942340964	-0.000793506
AAGCACTGACCAATGCTTCAGCCT_8	0.612806593597354	0.0546797302674478
CATACCACAGCTCCTATCCGAGTT_8	0.78962030142206	0.093269658849849
AGTGGATCACCTAAGGAACCTCCT_8	0.923834684345565	-0.0214326
GAAGTTGGTGTGAAGCAGGCATAG_8	0.275883999925976	-0.10841
GCTATCCTACATTGCGAGGTCACT_8	0.700417252121191	0.0276559230427442
ACTCCATCCGATAGAGACGTCGTA_8	0.958659961463945	0.0928525401039305
TGAGCTAGGTATGCTGATTCTGGC_8	0.921493112366385	0.0419747716346591
ACGTTCAGGCCTTGTTTTCTCTCG_8	0.801567133201329	0.106073152494408
ATCGATCGAGTCTGTGTTGTCGGT_8	1.4929803006261	-0.125425
CCTGATTGTACGGTTGGCTTAGCT_8	0.895473770664104	-0.0728154
GAATCCGAACTCGTTGTCCGAGTT_8	0.782334054308703	-0.0233054
ATCCAGAGCTCAGAGTACTGCTAG_8	0.546933361936439	0.0516408114949942
TATCGGTCCCAAGTTGGTTCATGG_8	0.562112427825952	-0.080669
CCGTAAGAGCTGGATTTACACGCT_8	1.04128352715818	-0.128494
GTCGAAGAATGGTTGCAAGGCTGA_8	1.39033627297656	-0.0159838
ATGCACGATGATCGGACGAACTGT_8	0.568513067483655	-0.022496
ATGCCTGTTACATCGGTCCGAGTT_8	0.899096699650944	-0.0215928
GCAAGATCCCTACTGATGTGGTAC_8	1.22829362786653	-0.00691049
AGCACTTCTGGAGTTGTCGTGGAT_8	1.12131425042119	-0.133038
ATGACGTCCAATCGACAACCTCCT_8	0.663331421305972	-0.0684918
CTGATCGTGAACGCTTCCAGTGTT_8	0.897809960420214	-0.0190505
GAATCCGACGAGACTAAGGCATAG_8	0.795035954772972	-0.0191118
ACGACTTGGTATGCTGCAGCGATT_8	1.10774635857665	-0.0193089
ATCCAGAGGATACTGGCAGCGATT_8	0.681120971375569	-0.0690434
CAACACCTTGTGAAGCCGATGCTT_8	0.530916628006617	-0.00548712
GATAGGCTAATGGACGGTGTTCCT_8	1.21667926596678	-0.0660389
GATTGCTCAGGTTCGACGGAATAC_8	0.465855129578931	-0.0175494
TGCTTCCAGAGGACTTAGGATGGT_8	0.742195213460023	0.141225506968075
TTCGTTGGGAGATGTCTTGTCGGT_8	1.14033406827459	0.046919266116322
AGTTCGTCAGCTCCTATACACGCT_8	0.611417713632622	0.114712093834665
GATTGCTCCTCATTGCTCACGTTC_8	1.3412330800299	-0.0121051
GCACAACTCTGACACACAAGTGCA_8	0.769602033508316	-0.0226218
ATCCGGTAGATAGCGAGCTTCTTG_8	0.697859556851179	0.0885805524006435
CTGTTGACGACTTAGGTATCAGCG_8	0.922121310841923	-0.126349
GCACAACTTAGTTGCGGCATACAG_8	0.901297830331561	-0.0814364
CGTGTGTAACTCGTTGACCTTCTC_8	0.944990686846017	0.0975397578000907
CTTAGGACAGTCGACAAACCTCCT_8	1.01968881880967	-0.0139334
GAACATCGCGTCAATGCTCAGCTA_8	0.889368839838021	0.0337062617936459
TATCGGTCGAACGCTTACTGTGTC_8	1.5288794158281	-0.0727022
CCTGATTGCAGTTCTGCCTTCCTT_8	0.585768233589534	0.167922634427845
GATTGCTCTCTCTAGGGATCGTAC_8	0.97029109106394	-0.134403
ATATGCGCCTGACACATGGTCCTT_8	0.744304899613513	-0.0758993
ATGCACGAGTATGCTGTGTGGTAC_8	0.796965448567411	-0.00499414
CAACACCTGATACTGGCCTTCCTT_8	0.794067850834167	0.0884834320359018
GCGTCATTACCAATGCGCGTTCTA_8	0.611745003914366	-0.0569118
TAACCGGTGCCATAACTGGTCCTT_8	0.594316287457501	-0.0733935
ATGACGTCACTCGTTGGCCAGTAT_8	0.959260798080875	-0.00933471
CCGTAAGAGATAGCGAGTTCATGG_8	0.630875414896778	-0.0644996
GTCGAAGATCGAACCACGAGTATG_8	0.910796455416215	-0.0668281
AGAACGAGCAGAATCGCACCACTA_8	0.896323635354551	-0.0195679
CGACGTTAAATGCCTCGTATTGGC_8	1.10164557361097	-0.0708861
GAATCCGAAATGGACGCAGTCTTC_8	1.34821159898869	-0.131451
ATGCCTGTCGCTAGTAAACTGGTG_8	0.869595894727402	-0.0595269
CAACACCTCGTTATGCTCGTAGTC_8	0.663532848354896	0.14893609006496
CTGATCGTGAACGCTTCATGGAAC_8	0.660583109970021	-0.0784343
ACTCTCGACAATCGACTTGACAGG_8	0.478109156892399	0.00342379769191545
GTTGTTCGTCTAACGCCGTGTACT_8	1.30884479561396	-0.0612165
CGCATGATCGACCATTACCGCATA_8	0.671186831964854	-0.0617253
AACTGAGCGATACTGGCCATACGT_8	0.866881295539104	0.0254575056965787
ACAGCTCATACCAGGATCGAGTGA_8	0.882017592382816	-0.0150046
ATCGATCGCGGATTGAAGGATCTG_8	0.382096547018603	-0.135184
CGCTCTATCTAGGTGAAGGCATAG_8	1.03224470646515	-0.00772796
CTTAGGACCGCTAGTATGCACCAA_8	0.749151760280553	-0.0726914
GATGTGTGAGCTCCTATTGTCGGT_8	1.03307879455605	-0.104315
CATACCACACATTGCGTCCGAGTT_8	0.997709913144126	-0.027329
CGTGTGTAGCCATAACTCAGACGA_8	1.14422873252257	-0.0277805
AGAACGAGGAGATGTCCATCTACG_8	1.14009845399623	0.208675166383975
CCTGATTGTCGAACCAGCTGTTGT_8	0.831332841028764	-0.000518573
CGCATGATCTGGAGTATGCGTAGA_8	0.649493967464604	-0.0082869
TACGCCTTAGCTCCTACGGAATAC_8	0.86367173660459	0.00326285180798692
CCTTGATCAGTGCAGTGCTTCTTG_8	0.863047563347188	0.042850200573272
ATCGATCGGCCTTGTTGCATACAG_8	0.756293361817891	0.133470533339752
ATCGCCATAGTCTGTGTCACGTTC_8	0.877625454292969	0.0725080849389482
GTGAAGTGCGACCATTGCAATTCG_8	0.743075685481584	0.0437824002542894
ATATGCGCGTCTCCTTCGATGCTT_8	0.901689107452109	0.0587775098089326
GAACATCGTCTCGCAAACTGTGTC_8	0.880086114891809	-0.0667043
TAACCGGTCTAGGCATGATCGTAC_8	0.515673149659743	0.036876695362874
ATGCACGAGTCTCCTTACATAGGC_8	0.77722887043024	-0.0662085
ATGCACGACGTACGAAAGTCAGGA_8	0.71472837771879	0.103870926244547
ACTCCATCGTCGGTAATTCAGCCT_8	0.595039941358932	-0.0188427
TGCTTCCAGAATCGTGCTCAGCTA_8	0.562943806896325	0.0925533746172844
AGAGTAGCGAGATACGAACCTCCT_8	0.742372901450554	0.0460005430286068
CATGGCTAATTCGAGGCTCTGGTT_8	0.701453855658218	0.143287558832051
CCTGATTGGAGGACTTCGAGTATG_8	0.772966854802679	0.0287736404762091
GAGACGATGTCAGTTGACATAGGC_8	0.879548135983453	-0.0836936
ATCGATCGCCTACTGAATGGAAGG_8	0.988573213640426	-0.0812629
GTGAAGTGATGGTTGCCTACAGTG_8	1.15228161869572	-0.02456
TACGCCTTACGTGATGTTGACAGG_8	0.619419513806129	0.0359492933674329
AACCGTTCGCCTTGTTTCTGCTCT_8	0.648920190396022	0.0116145361462192
ACTCTCGAGCCTTGTTCCTTCCTT_8	0.598029360997992	0.26282878409407
ACTCTCGAGTCTCCTTTCGTAGTC_8	0.561508239534872	0.155420702028444
ACGACTTGTCCGTATGCTTCGTTC_8	1.09210114076309	-0.116595
CAACACCTCAGTTCTGACCATGTG_8	0.709830281449364	-0.00746675
ATGACGTCCAGTTCTGGCAATTCG_8	0.4814497621115	0.144216484888536
ACGTTCAGGATAGCGAGACAAGAG_8	0.991136299119449	0.0533561069875535
CTTCGACTTCTCTAGGTTCAGCCT_8	1.07366059477837	-0.017397
ATCGATCGAGTGCAGTCGAACTGT_8	0.97720699211747	-0.0108367
ATCGATCGTCTAACGCACCGCATA_8	0.604950014095246	0.0378187666102554
CCTGATTGCATTCGGTCACTGACA_8	0.961231688118093	-0.00618907
TGCTTCCATCCGTATGAGGCATAG_8	0.810621678912607	0.00442930014999915
AAGCACTGACGTGATGCTCAGCTA_8	0.991783465905514	-0.120493
CGCTCTATAGCTCCTACCATACGT_8	0.518825559204771	-0.0279748
CGCTCTATTCTAACGCCCATACGT_8	0.530507670023128	0.03399975252627
AGAACGAGCGATAGAGATGGAAGG_8	0.844421158213404	-0.0771506
AGAACGAGGTCCTAAGCAGGTATC_8	0.81841316091813	-0.0696594
ATGACGTCGATGCACTTCACGTTC_8	0.692203000681122	0.159891768825825
TGCTTCCAAATGCCTCAAGGCTGA_8	0.652266664171793	0.156310619212933
ACTCTCGATCTCTAGGGCTTCTTG_8	0.995410801087476	0.11277764767862
ACTCCATCTGCCATTCTCTGAGAG_8	0.500964081897423	-0.0218776
ACTCCATCAGAAGCGTTTAGGTCG_8	0.53012800238884	0.077996428418597
ATCCAGAGGATACTGGCTCTGGTT_8	0.932419103593782	-0.129795
GTCGAAGAACCAATGCCAAGCAGT_8	0.780495569593311	-0.0269283
CCTTGATCCGTACGAAACTGTGTC_8	0.605828746340748	0.0317476847819815
TGCTTCCACCAAGTTGCGAACTGT_8	0.809092018243359	0.0304274938576628
ACTCTCGAGATAGCGATTCTCTCG_8	0.671031279249168	-0.0746578
ATATGCGCTCCGTATGCCTTCCTT_8	0.784210611246335	0.107034730294071
ATGACGTCGAACGCTTTCCGAGTT_8	0.450503377818526	0.0536540699021307
GATCGAGTTGGAGTTGTCTGAGAG_8	0.566224955418375	0.0902353102183233
GTTGACCTCTCAGAGTTCTGAGAG_8	1.21279035506252	-0.13254
ATGCACGAACCTAAGGCCATACGT_8	0.409786668728315	-0.0235543
GTTGACCTCGATAGAGGCTTCTTG_8	1.44504970986886	-0.0210335
TTGCAGACACATTGCGCTTCGTTC_8	2.0012673102615	-0.0985312
ATGACGTCCACAAGTCCAAGGTCT_8	0.639934783036433	-0.0723225
ACTAGGAGAATGCCTCCCATACGT_8	0.837141648575562	0.0476842399396308
AGCACTTCCAGAATCGGTCTAGGT_8	0.965525843277144	-0.0251637
CGCAATCTGAGGACTTACCTTCTC_8	0.403275964795436	-0.0050468
GAATCCGAGCCATAACACCGCATA_8	1.06213173502761	-0.0174631
CACCTGTTGCCATAACCACCACTA_8	0.748994759698557	-0.118132
ATATGCGCCGGATTGACATCTACG_8	0.883845684984338	-0.0696994
CCTGATTGCGTCAATGCGATGCTT_8	0.761506946976908	-0.0817346
ACCACGATCTTACAGCAACCTCCT_8	0.588057208294874	0.0265841893725595
ATATGCGCTTGGTGAGCTAACTCG_8	0.81451595356986	0.225673411001471
ATCGATCGGTCCTAAGGTGTTCCT_8	0.618495023472961	0.136273260968839
ATGCACGACTGGAGTACCATACGT_8	0.823200865609035	-0.0839892
TCAGGCTTTAGTTGCGCATAACGG_8	0.442291011551163	0.0156876074619922
TCGCTGTTCTCATTGCGTGTTCCT_8	0.610811365973236	0.00538299348331847
GAACATCGCTAGGTGAAGCAGATG_8	1.15664495412528	-0.0283617
AGTTCGTCCGACCATTATTCTGGC_8	0.658244806035279	0.0351986365919758
AGTTCGTCTTGATCCGTAGGATGC_8	0.70492264047729	0.0462429316930582
GAAGTTGGACGATGACTGTGGTAC_8	1.22539083854089	-0.0749837
TGCTTCCAAGCTCCTATTCAGCCT_8	0.523015003967765	0.167669788135566
ACAGCTCAGAATCGTGCCATACGT_8	1.04252976034239	-0.080255
ATATGCGCATCGGTGTCATGGAAC_8	1.15341880587403	-0.0656906
AACCGTTCAGCTCCTACATCTACG_8	0.91416285218702	0.174959268555607
AGAACGAGAGAAGCGTGCTTCGAA_8	0.693316865942618	0.0788342424718463
GAAGTTGGAGTGCAGTATGGAAGG_8	0.916716623816169	-0.11262
GTTGTTCGCTTGCTGTTTGTCGGT_8	0.878832378530108	-0.0184272
CAATGTGGTACCAGGACCAGTGTT_8	1.15525695793262	-0.146415
ATCGATCGACCAGCTTGCACGTAA_8	0.396995289511496	0.102852385984639
CGTGTGTACTATCGCATGCACCAA_8	1.24390810115108	-0.128488
AGCGTGTTTCTCGCAACAGCGATT_8	0.818564760749098	-0.0756878
GCACAACTCTGGAGTACTAACTCG_8	0.626025540837593	0.0526992734816767
CAACACCTCATTCGGTGCTTAGCT_8	0.919869986754716	-0.138957
CCTTGATCACCAATGCACTGTGTC_8	0.576586698569949	0.0974893055155539
GTTCTCGTCGAGACTAGCTGTTGT_8	0.690610544543203	-0.073672
GAGACGATGATACTGGCGGAATAC_8	0.960181520547982	-0.0161694
GAGCAGTAGTCAGTTGACCGCATA_8	0.885405975036419	-0.0296562
GACGATCTACCAATGCCCTTCCTT_8	0.46520036547171	-0.06691
GTGAAGTGGCCTTGTTTGGTCCTT_8	0.816171442275026	0.0422865861325928
GTTGACCTCCTACTGATGGTCCTT_8	0.62580595304691	-0.0223214
TGAGCTAGGATAGCGAGACAAGAG_8	0.799402230134264	-0.0664288
CGCTCTATCTGACACACAGCGATT_8	0.797192650018828	0.0706707957972929
TGAGCTAGCCGACTATGCAATTCG_8	0.716961247051766	-0.0704862
AGTTCGTCCTGGAGTAACCTTCTC_8	0.725874004571827	-0.0518863
GAGCAGTAACTCGTTGCTGGTTCT_8	1.01031108162873	0.0350896005491797
GTTGACCTATTCGAGGCAGTCTTC_8	0.771366995194777	0.0840077208400525
CCTGATTGGCTGGATTCAGGTATC_8	0.806249170749192	0.0205288874976215
AGTTCGTCCCGACTATAAGAGCCA_8	0.698146551251084	-0.0280261
TATCGGTCGAACGCTTCCTTCCTT_8	0.92490991504254	-0.0101251
ATATGCGCTAAGTGGCGCTTCTTG_8	0.716014068505682	-0.0281412
GATTACCGTACATCGGTAGCCGAA_8	0.661813268533819	-0.0142175
CGGCTAATCTAGGCATCTCAGCTA_8	0.873331816607503	-0.148699
TTCGTTGGTCGAAGGTTTGTCGGT_8	0.577697815360762	-0.0218943
AACCGTTCCTTGCTGTCAGGTATC_8	0.840570653558832	0.0315463397347547
AACTGAGCGTCCTAAGGCAATTCG_8	1.09647993586936	0.0955714167863575
CCTTGATCGATAGCGACCTTCCTT_8	0.905531647015706	-0.0707506
GATTGCTCGACTATGCCAAGTGCA_8	0.773967852551084	0.064916661062309
GCTATCCTGTCCTAAGCTACAGTG_8	1.19641480894722	0.06177306501469
CATGGCTATAAGTGGCGCTTCTTG_8	1.1009541369922	0.186670434558553
AGTTCGTCCGCTAGTAACCTTCTC_8	0.710278304993768	-0.0747813
ATCGATCGTTACCGAGCCTTCCTT_8	0.835066036961836	0.0646623965834975
TTCGTTGGGTCGGTAACTACAGTG_8	0.382966204978644	-0.0328508
CATGGCTATCGAACCAGTTCATGG_8	1.20658700496127	0.0730177626679811
CCTGATTGCTTACAGCTCTCCGAT_8	1.17991366213294	0.0253716437054376
CGCTCTATTACCAGGACTAACTCG_8	0.988585640737967	0.0336229723261703
GTCGAAGATACATCGGGCCAGTAT_8	0.832877624367495	-0.0645529
ACTCTCGAACTCGTTGCGGAATAC_8	0.743679600096951	-0.0892953
AGAGTAGCATTCGAGGTCGTGGAT_8	0.587432023429262	0.125063882561005
AGAGTAGCGAGGACTTCTACAGTG_8	1.32852799403262	-0.07808
GCTATCCTCATTCGGTAGGTCACT_8	0.826504868323388	-0.0308788
AGAACGAGTGAGGTGTTTCTCTCG_8	1.16790934182336	0.0882968197064534
ATATGCGCGAATCGTGCTTCGTTC_8	0.614629580030767	0.0715375827648394
GAAGGAAGCTCTACTCAACCGAAG_8	0.790358743781966	0.0227717976802473
GTTGTTCGTGTGAAGCAGTCAGGA_8	0.707536659575968	-0.0216738
TTCCAAGGAGGTTCGAGCTTCTTG_8	1.6253814827855	-0.0861925
AAGCACTGGACTTAGGGTGTTCCT_8	0.722139152426438	-0.0826181
CGCTCTATAGGTTCGAACCTTCTC_8	0.812569802206975	-0.130601
GTCGAAGATACGGTTGTCTCCGAT_8	0.74603907998061	-0.0623663
TGGTACAGTCTCTAGGTAGGATGC_8	0.844633070404386	0.0473300182543557
ATGCACGAGCTCTGTACATGGAAC_8	1.39579921237442	-0.0576452
CATGGCTATGGAGAGTCGTGTACT_8	0.785148087207922	0.0183748343500987
CTTCGACTAGTGCAGTCTAACTCG_8	1.30398408778727	0.0262577766729032
GAGCAGTACCAAGTTGCGATGCTT_8	1.15805037315871	0.0160949761400394
CATGGCTAGCCATAACCAGTCTTC_8	0.502134745225722	0.0918344414176683
ACTCTCGATGGAGTTGCATAACGG_8	1.12271671124109	0.0257779611951622
AACGTCTGGAAGAGGTACTGTGTC_8	0.881779223311138	-0.00504951
CCTTGATCCAGTTCTGACAGCAAC_8	0.679028349809992	-0.0278978
ATCCAGAGCAACCTAGACAGCAAC_8	0.851530962492983	-0.0848127
GATTGCTCAGTCGACAAACCTCCT_8	0.567035735180648	0.0744933532832041
ATGCACGAATTCGAGGTTCAGCCT_8	1.05712193514307	-0.0825374
GTGCCATAACCAGCTTCTACAGTG_8	1.54244031453524	-0.0799283
TTCGTTGGGCCATAACCAGTCTTC_8	0.7808667798358	0.0486475845464766
ATATGCGCGTAGAGCAACCGCATA_8	0.637677556843662	-0.0729148
TTGCAGACCTGGAGTACAAGGTCT_8	1.15558663781785	0.139923542392347
CAGTCCAACTTACAGCGTGTTCCT_8	1.15854645062805	-0.0372898
ACTCTCGATACATCGGGTGTTCCT_8	0.502086620428393	0.0683135230158103
TAACCGGTCGTACGAACTGGTTCT_8	0.938361356897256	-0.127753
ACGGAACAACTCGTTGAAGGCTGA_8	1.33028422771984	0.0356276213807568
ATCGATCGAGTGCAGTCACCACTA_8	0.884309570401348	-0.0873469
TGCTTCCATGGAGTTGCCATACGT_8	0.725268991926096	-0.0166744
ACTCCATCCATTCGGTTTCTCTCG_8	1.19620681882567	0.0318055845301455
TCAGGCTTACCTAAGGCAGGTATC_8	1.01166405465227	-0.129603
AGAGTAGCTCCGTATGTCACGTTC_8	0.805256406250311	-0.0806777
AACTGAGCGTCCTAAGCAGGTATC_8	0.417491937056554	-0.0878743
ATCGCCATTGCCATTCCAGGTATC_8	1.69486892594125	-0.0227332
CGGCTAATACGATGACACCTTCTC_8	0.9459922456809	-0.089708
TGCTTCCACAGTTCTGCAGGTATC_8	0.592877008322608	-0.0184104
CACCTGTTAATGGACGTTCAGCCT_8	0.658770321954058	-0.0581795
CGCATGATTCGAACCACATGGAAC_8	1.08248736575231	0.122659356842876
TTGGACGTACTCGTTGTTCAGCCT_8	0.840215291725872	-0.0310328
CAGTCCAAGTATGCTGAGGATGGT_8	0.886034411739223	-0.0912896
GTCATCGAAGCTCCTAGCTGTTGT_8	0.672810305622014	0.0125661107334102
AGAGTAGCAGGTTCGACTAACTCG_8	0.611916758925167	0.0301946082064225
GAAGTTGGTCGAACCAGCCAGTAT_8	0.485494281903343	-0.031126
CTTAGGACACGATGACGCTTCGAA_8	1.12566599796649	0.0206512899113041
AGAACGAGGATACTGGGCGTTCTA_8	0.681392878258196	0.145999643847418
TTGCGAAGAATGCCTCACCTTCTC_8	0.492571793025391	-0.0355144
ATATGCGCCATTGCCTTCTGAGAG_8	0.428369526749779	0.182829394971174
ATATGCGCCGTCAATGTCGAGTGA_8	0.624219121855748	0.020372955055727
ATCCAGAGACCTAAGGACGTCGTA_8	1.35631377804045	0.114880203043528
GCGTCATTAGTCTGTGTCTGCTCT_8	0.706833459421771	0.0894496085590349
TCGCTGTTCACAAGTCACCGCATA_8	0.845021017957201	-0.0273945
GTGCCATAGATAGCGACCTTCCTT_8	1.07573634197851	-0.0166384
ACTCTCGACGTTATGCTACACGCT_8	0.933837448301208	0.0358801218140938
ATATGCGCTCTCGCAACCATACGT_8	0.971056185569033	-0.0881911
TACGCTACGTCGGTAAATGGAAGG_8	1.03055225611632	0.0174439902888468
ACGTTCAGACGTGATGTTCTCTCG_8	0.736814853210985	-0.0264942
GTTGTTCGTGCCATTCACGTCGTA_8	0.948360053192966	0.0877104678694348
ACTCTCGATAAGTGGCTTCAGCCT_8	0.706296330822593	0.0127054947543642
CGTGTGTATGGAGTTGTCTGCTCT_8	0.362934664014731	-0.0809066
GATAGGCTCGTTATGCTAGGATGC_8	0.963191383009907	-0.0539787
TGGTACAGCAGTTCTGGCTTAGCT_8	0.74089870787776	-0.0798239
TGCTTCCACAACCTAGCATGGAAC_8	0.801771324816535	0.245600091177257
ACTCCATCACGATGACGCTTCGAA_8	0.864732153474534	-0.083491
CGCAATCTCTAGGTGAACTGCTAG_8	1.70781405728181	-0.0857209
GTTGACCTGTAGAGCACGTAGGTT_8	0.67775715362554	-0.023474
AGCACTTCCATTCGGTTTGACAGG_8	0.683017642679354	0.125962737920554
GAACATCGGTCAGTTGGTTCATGG_8	1.36770192673627	-0.0338028
GTAGGAGTATGGTTGCTAGGATGC_8	0.330923037618392	0.0530555239614559
TTGCGAAGTAAGTGGCTGCACCAA_8	0.893387813218001	0.0872283441220252
ACGGAACACCTACTGATTCAGCCT_8	0.595616091744621	-0.0900954
CATGGCTAGAACGCTTCCAGTGTT_8	0.640720934665002	0.106127325847093
TGCTTCCACGACCATTATTCTGGC_8	0.538935614176586	0.0793813154841935
ACTAGGAGTCTAACGCAACTGGTG_8	0.849500950540433	0.0228814024750427
ATGCCTGTAATGGACGCGGAATAC_8	0.455527474442726	0.0745114066432705
AACTGAGCCTTACAGCTGCCTCTT_8	0.836193065321006	0.0693069060192733
ACTCCATCTTACCGAGTCTGCTCT_8	0.699974718223477	-2.63684e-05
AGAGTAGCTACGGTTGCCAGTGTT_8	1.37197064823401	0.167025836389596
GTTGACCTAGAAGCGTTCGTAGTC_8	0.95652648142354	-0.0891895
TACGCCTTCTCTACTCCTCAGCTA_8	0.412443026335066	-0.127321
TGCTTCCACGTACGAATCGTAGTC_8	0.957328458268036	0.0232240429621675
CCTTGATCGAAGAGGTAGCAGATG_8	0.548483893804931	-0.132501
AGTGGATCCTAGGTGAATTCTGGC_8	0.890344782762784	-0.130295
TATCGGTCCGTCAATGCTGGTTCT_8	0.815195015317914	-0.0871762
CAACACCTCAATCGACTCTGCTCT_8	0.773810809466399	0.0179595234317929
CATGGCTACTCTACTCCATCTACG_8	0.92059023840242	0.0592774392344722
CTTAGGACACATTGCGTATCAGCG_8	1.31726213627396	-0.0690268
GATTGCTCTGGAGAGTCACCACTA_8	1.01276227361988	-0.041643
AGTTCGTCAGGCTTCTGATTGGAG_8	0.54908841898025	-0.0333518
ATCGATCGCAACCTAGCTCTGGTT_8	0.776011149381401	0.0638708476341863
CCTTGATCGACTTAGGCTCTGGTT_8	1.30251376471047	0.0306601861071234
GAGACGATCGATAGAGAACCTTGG_8	0.763267511880153	-0.0254159
CCTTGTAGGTATGCTGGATCGTAC_8	0.405058264102326	-0.133464
GAAGGAAGTGGAGAGTGCCAGTAT_8	0.974996189981307	-0.0831011
TACGCCTTGCCTTGTTCTTCACCA_8	0.703939208478276	-0.0991634
TCAGGCTTGTCCTAAGTTAGGTCG_8	0.733628317193983	0.125909064299124
GTTCTCGTCTATCGCAACTGCTAG_8	0.503685323852163	-0.00352297
ACTGAGGTACCTAAGGTCGTAGTC_8	1.28994824116075	-0.10066
ATATGCGCACCTAAGGCCTTCCTT_8	0.699427789432539	-0.0823384
TATCGGTCTACATCGGGCTGTTGT_8	0.486393307529869	0.0329550801053149
ACGGAACAGAGGACTTACTGTGTC_8	1.48838726195914	-0.029461
ACTCTCGATCCGTATGCTGCGTAT_8	1.11260564544093	-0.140666
CCTTGATCTGGAGAGTGCATACAG_8	0.484354526050143	0.0691146615134538
GTGAAGTGACCTAAGGTAGCCGAA_8	0.905778371769846	0.236806653291705
TGGTACAGAGTGCAGTGCGTTCTA_8	1.2016353129035	-0.0249234
GCAAGATCTCCGTATGCGATGCTT_8	0.645982154084802	0.0547451177638585
GTCGAAGATCCGTATGGATTGGAG_8	1.35792481108329	0.165586480982968
GTTACGCACACAAGTCTTCTCTCG_8	0.588100225959093	0.0348292757204799
GTTGACCTGATAGCGATAGCCGAA_8	1.03079142020959	-0.0823604
ATATGCGCATGGTTGCTCGAGTGA_8	0.668309321153618	0.0799357743743737
ACTAGGAGGACGAATGTGTCCAGA_8	0.549497896539653	-0.133044
GAGCAGTATTACCGAGAAGAGCCA_8	0.692224443152452	0.0239051691345229
ATATGCGCGAGATACGTCCGAGTT_8	0.636675172938713	0.00986874850313496
TGAGCTAGATCGGTGTTCGAGTGA_8	0.692842877080738	0.0787872288185267
CGGTTGTTAGAAGCGTTCCGAGTT_8	1.21744914321716	-0.092512
ATATGCGCGCTCTGTAAACTGGTG_8	1.03373452197633	0.231975933562808
GATTGCTCTCTAACGCCATAACGG_8	0.550675517127966	-0.048507
GTAGGAGTGACGAATGGTAGCATC_8	1.49538720487093	-0.0578961
GTCATCGAGAAGAGGTATGGAAGG_8	1.43395433372533	-0.0367647
AGCACTTCCGTACGAATTACGGCT_8	0.851464237595151	0.0313066403968679
ATGCCTGTAATGGACGACTGTGTC_8	0.469957863976003	0.110059545071303
TATCGGTCACGTGATGACAGCAAC_8	0.6314268364092	0.0310148177554059
TGAGCTAGGAGGACTTAGCAGATG_8	0.808062743385405	0.00442270443858089
TGGCATGTAGAAGCGTGTTCATGG_8	0.988639596155412	-0.0107883
ATGACGTCTGGAGTTGTCAGACGA_8	1.19393389950352	-0.0784811
CTTGTCGACGAGACTATTAGGTCG_8	1.37185103911953	0.10308938622452
ATATGCGCGAAGAGGTACCGCATA_8	1.66484093845602	0.0574102533881763
TGAGCTAGCTCATTGCCTAACTCG_8	1.05143491853101	-0.131571
CGGTTGTTAGAAGCGTGTCTAGGT_8	0.456132725138626	0.0959293472959128
GATGTGTGCTCTACTCCGTAGGTT_8	0.996530823439781	-0.0829806
ATCCAGAGGACGAATGGTAGCATC_8	0.740354324898293	-0.031458
CATGGCTATCGAACCACCATACGT_8	0.657433294337878	0.128399162047495
TTGCGAAGTCGAAGGTCTCTGGTT_8	0.985893309910324	-0.0599982
CGTGTGTAACCAGCTTATTCTGGC_8	0.815753114273367	0.0622615896257238
ACAGCTCAGATAGCGACTAACTCG_8	0.759256022104359	0.078247400920465
AGTGGATCACCAATGCTCCGAGTT_8	0.970390399863369	-0.0635355
TCAGGCTTTGCCATTCTTCAGCCT_8	0.818283821246979	0.0190743876819882
GATTGCTCGCTGGATTCTACAGTG_8	0.756798059380799	-0.0908278
GACGATCTGTAGAGCACGATGCTT_8	0.797706327582834	0.0193254418077737
GTGAAGTGCAATCGACCAGCGATT_8	0.831524367764875	-0.0501664
TGAAGACGACCAATGCTCAGACGA_8	0.936145875406882	-0.0796119
GTGAAGTGACATTGCGACCATGTG_8	0.583144061429555	-0.0785386
AACTGAGCATGGTTGCCTAACTCG_8	1.33398166783853	-0.0474246
ATCACACGTGGAGAGTTGCACCAA_8	0.692980061852485	0.0417483963038819
ACTCCATCGCTGGATTCAGTCTTC_8	0.839667804992542	-0.0420941
ACGGAACATGTGAAGCCTACAGTG_8	0.813073480208972	0.0446865253895257
TGAGCTAGCAGTTCTGCGATGCTT_8	0.878825275240754	-0.156639
GTTGACCTGTCCTAAGTCGTGGAT_8	0.461775709833709	0.0104870233418273
TGGCATGTAGTCTGTGTCGACATC_8	0.975547788731794	0.0534380998576024
ATCCGGTATTGGTGAGCGAACTGT_8	1.24663242225296	-0.0494632
ATCGATCGAGTCTGTGTAGCCGAA_8	0.950302208901395	0.000607663889337501
GTCGAAGATGTGAAGCCTGGTTCT_8	0.828591209827379	0.0202536034536867
CTTAGGACCCGACTATCATGGAAC_8	0.679849813057532	-0.044747
CGACGTTATGGAGTTGCGATGCTT_8	1.20131	0.0124659852963234
TGCTTCCATCCGTATGTTCAGCCT_8	0.869161744779029	0.155413471612915
ATCGATCGCGACCATTAACTGGTG_8	0.62422708736999	-0.145301
ATCCAGAGCATTCGGTTGTCCAGA_8	1.05238218805662	-0.0989205
CGCTCTATCATTGCCTACAGCAAC_8	0.781146831791137	-0.0470189
CTTAGGACGAACGCTTTAGGATGC_8	0.639936868553672	0.0189043970766804
GATTGCTCTAAGTGGCTCGAGTGA_8	1.95951918273918	-0.0584952
GTTGACCTCAGAATCGTGTGGTAC_8	0.498701371529038	-0.0223274
CGTGTGTATCGAACCACCTTCCTT_8	0.773424740121128	-0.0296388
AGCACTTCTCGAACCATGTCCAGA_8	0.583329707418096	0.0871135097262432
ACTGAGGTGAGATGTCTGGTCCTT_8	0.616278743388714	-0.0977281
AGCGTGTTAGAAGCGTTATCAGCG_8	1.22025837995781	-0.141341
GATTGCTCTCTCGCAACACCACTA_8	0.955008651224068	-0.039301
CCGTAAGACACAAGTCACCTTCTC_8	1.25990246016845	-0.0884177
GATTGCTCCCGACTATAGTCAGGA_8	0.589992658992008	-0.0420177
TCAGGCTTGACTTAGGTTGACAGG_8	0.719466787021223	-0.0846292
ATGACGTCCTGACACAACCTTCTC_8	1.11511929675106	0.0110082282078957
GTCGAAGACGTTATGCAACTGGTG_8	0.945090842874455	-0.0557955
CATGGCTAGAGGACTTTTGACAGG_8	0.765233699944724	-0.144714
TGGTACAGACCTAAGGTCTCCGAT_8	0.51172980855199	0.00328719596668151
ATCCGGTACGACCATTCACTGACA_8	1.17380975581649	0.0310588112358176
AGAGTAGCCAGAATCGTTCAGCCT_8	0.65089619010798	-0.00675683
TGCTTCCACATTCGGTGCGTTCTA_8	0.884335356705082	0.0902003566417705
TGAGCTAGGATGCACTAACTGGTG_8	0.83287210858605	0.165976258425888
GAGCAGTACGAGACTAGTGTTCCT_8	0.511303158442289	-0.000794052
ATCCAGAGCAGTTCTGACGTCGTA_8	0.516724664779273	-0.0634452
GAAGGAAGTAGTTGCGGCTTAGCT_8	0.568876970369671	0.00518392903238893
ACGTTCAGATCGGTGTACGTCGTA_8	0.852810979375658	0.0485980491072162
ACTCTCGAGTCGGTAATAGCCGAA_8	1.05500075217532	0.0548547737125012
ATCGATCGAATGGACGCGAACTGT_8	0.836923771189259	-0.0821481
ACAGCTCAGCTCTGTAACCGCATA_8	0.767117234637662	0.0947999613867188
TGGTACAGTCTCGCAACATGGAAC_8	0.538829165183945	-0.0381258
GCTATCCTAGGCTTCTCAAGGTCT_8	1.00561241696635	-0.0934865
CGGTTGTTGTAGAGCAGTTCATGG_8	1.04772095540465	-0.0451986
ACGTTCAGCGACCATTTCTGCTCT_8	1.05350506237279	-0.0396904
TGGACTCTTGAGGTGTTGTGGTAC_8	0.846826242821426	-0.0392935
AGCACTTCAAGGACACACAGCAAC_8	0.675409773339453	0.00471167080022572
GATCGAGTCCTACTGAGATTGGAG_8	0.656356630689249	0.0188703711429598
GCAAGATCGATAGCGAAGGATGGT_8	0.859992786471282	-0.0942454
AGAACGAGTACATCGGTGTGGTAC_8	0.861977850265007	-0.053529
CAATGTGGAGAAGCGTCAGGTATC_8	0.629113302871201	0.17426076108186
GAGCAGTAGAGGACTTTTGTCGGT_8	1.05080088603903	0.0180114550390107
GTGCCATAGTATGCTGTACACGCT_8	0.658030563060694	-0.0888699
ATGACGTCGCCATAACGCCAGTAT_8	0.819588643772073	0.022118330452267
CGGTTGTTAGGAGGAAGTTCATGG_8	0.890092098408514	0.122779725227847
CGGTTGTTCTCAGAGTCTACAGTG_8	0.766757755162114	0.0834457921932687
ATCCAGAGTCTCTAGGTGCCTCTT_8	1.05648959162496	0.0694472738885931
AAGCACTGGATGCACTGCGTTCTA_8	0.805562118040682	0.10100323189188
GAACATCGCATTCGGTCACCACTA_8	1.45727302747491	-0.0862139
ACTCCATCCTTACAGCAACCGAAG_8	0.719842655224066	0.104585355178719
ATCACACGCTGACACACTGCGTAT_8	1.19437346666833	-0.0968301
ACGGAACACTCTACTCTTCAGCCT_8	1.35715550667081	-0.0339911
TCGCTGTTATCGGTGTCCTTCCTT_8	0.855837821599554	0.120956291959098
GCGTCATTCAACCTAGGCACGTAA_8	1.12781505510218	-0.000603641
ACTCCATCCTTGCTGTAACCTCCT_8	0.751455771640838	-0.0364696
ACTCTCGAAGTCTGTGTGGTCCTT_8	0.736481862521849	-0.0372198
TCAGGCTTTGGAGAGTTCGTGGAT_8	1.21724129587776	-0.0204287
GAATCCGAACCAGCTTGATTGGAG_8	1.12410839334418	0.0171865347992363
GATTACCGGTCTCCTTTTCAGCCT_8	0.81128968252579	0.0450322360116233
AAGCACTGGTCAGTTGGCGTTCTA_8	0.541681361039261	-0.0811761
CGGTTGTTCTCTACTCAGTCAGGA_8	0.854293515826139	-0.0585175
CTTCGACTTACATCGGAACCTCCT_8	0.772381929914579	0.0438848113656034
GATTGCTCAATGCCTCTCCGAGTT_8	1.28079526430751	-0.00246248
TGGACTCTCTCAGAGTTATCAGCG_8	0.322317167843543	-0.0574561
TACGCCTTTCTCGCAACTGGTTCT_8	0.735048804982131	-0.0332424
ACTCTCGAGATGCACTCAGCGATT_8	0.835918346230368	-0.00651432
TGGTACAGGATACTGGAACCTTGG_8	1.16573093726403	-0.0505305
CCTTGTAGGCCATAACTCAGACGA_8	1.12482390201608	-0.00670767
ACTCTCGAATTCGAGGTGTCCAGA_8	0.666813258657048	-0.102367
ATGACGTCTAAGTGGCCTCTGGTT_8	0.672841243954085	0.0562874815048235
TTGCAGACTTGATCCGCACTGACA_8	1.1584486553468	-0.0965409
TCAGGCTTATGGTTGCCTCAGCTA_8	0.812782187071263	0.0506049369749433
ACTCTCGAGCTGGATTACCTTCTC_8	0.486406868201171	0.0730165791338481
ACCACGATCGAGACTATTACGGCT_8	0.630887915700455	0.038007121683784
TATCGGTCCATTGCCTCAGGTATC_8	0.554079136572863	-0.0524356
GATCGAGTCGCTAGTAAAGAGCCA_8	1.27828023771354	0.0250884097745354
CATGGCTACAACCTAGAACGGTCA_8	1.46322204692111	-0.0779487
GAACATCGGACTATGCCCTTCCTT_8	1.24075344393475	-0.087097
TGGTACAGGTATGCTGAAGGCTGA_8	1.38728104149911	0.0560264944855549
ACGTTCAGAGTGCAGTTTGTCGGT_8	1.45052127674219	-0.0964396
ACTCTCGACAATCGACCGAACTGT_8	0.572746948267372	-0.0571507
ACGGAACACGTCAATGTAGGATGC_8	1.16766639922904	-0.083446
GTGCCATACCAAGTTGCGTAGGTT_8	0.923024154532833	-0.145524
GTTGACCTTTCAGGAGTATCAGCG_8	1.33340349072098	-0.105558
GATTGCTCTCTCGCAATCCGAGTT_8	1.04642682430574	-0.0589042
GATCGAGTCATTGCCTCGAACTGT_8	0.969701327877522	-0.11607
ACAGCTCAACCAGCTTACCATGTG_8	1.29234454487454	-0.0734577
GTTACGCAGCTCTGTAAACGGTCA_8	0.910951356923893	-0.0988918
AGCGTGTTCCAAGTTGAACCGAAG_8	1.03937086180647	0.0373401787598235
CGACGTTACTCATTGCTTCAGCCT_8	1.20032678466969	-0.0440468
GAGCAGTAACGATGACTTGTCGGT_8	0.693712697038413	-0.056205
GATCGAGTGCTGGATTTGGTCCTT_8	0.558269474904168	0.0546858770069738
AACTGAGCGAGATACGCGATGCTT_8	0.725544972460982	-0.107756
GTGAAGTGGACTTAGGACGTCGTA_8	1.0422953648009	-0.0570968
CACTAGCTACCAGCTTACGTCGTA_8	1.69799646831043	-0.0206199
GTCATCGATGGAGTTGCGTAGGTT_8	1.04245100096004	-0.0981339
AGTGGATCTACGGTTGGCTTCTTG_8	0.83805050228324	-0.0366894
GTTCTCGTAGTCGACATCGACATC_8	0.991154380049433	0.0932392596199431
TGGACTCTCATTGCCTTTCAGCCT_8	0.645787711584574	-0.0228917
GATTACCGGAAGAGGTCAGCGATT_8	0.696697700790049	-0.149206
ATCGATCGTGCCATTCATGGAAGG_8	1.18346805924146	0.00814453316889313
CAACACCTCTGACACAATGGAAGG_8	0.837515355721322	0.0930737691001283
GAGACGATACCAGCTTTTCAGCCT_8	0.855142266126104	-0.0474547
GCAAGATCTCGAACCAATTCTGGC_8	0.76501764991774	-0.0951094
ATGCACGATCTAACGCCAGTCTTC_8	1.13725638687713	-0.0725729
AGCACTTCCGGATTGATACACGCT_8	0.640093201913591	-0.0149973
CGGTTGTTTGTGCGTTACGGTCTT_8	1.08816648738019	-0.00500491
TGAGCTAGCTCTACTCGCTTCTTG_8	0.622499202363806	0.039736685240756
GTTGTTCGGACTTAGGCACCACTA_8	1.63276819957787	-0.0250973
ACCACGATTTGATCCGTGCACCAA_8	0.820318300573835	0.00716122778254033
CTGTTGACGAAGAGGTGTAGCATC_8	0.575447981047282	-0.0649966
TCAGGCTTAAGGACACGCCAGTAT_8	1.03510411974417	0.0883941584421921
CAACACCTTCTCGCAAACTGTGTC_8	1.25379931180577	-0.0476599
GAGCAGTACCAAGTTGGCGTTCTA_8	0.684417537397538	0.0104705014097411
ATGACGTCGAATCGTGCGAACTGT_8	0.543986850980065	0.193519303465573
CAGTCCAACTGGAGTAACCATGTG_8	1.20768252070197	-0.0563474
AGTTCGTCAGCTCCTACGAGTATG_8	0.413188566916612	0.158816375513226
CTTGTCGAGCCATAACCATGGAAC_8	1.16556240340001	-0.0502108
CCTTGATCCGCTAGTACAGCGATT_8	0.787171777672375	-0.0250455
TCAGGCTTACCAATGCTCCGAGTT_8	0.852967629195373	0.00950779172264732
GATAGGCTGATACTGGAACTGGTG_8	0.833290962679121	-0.137469
GTTGTTCGGCCTTGTTCAGTCTTC_8	1.42578618447501	0.00400357027337711
ACTGAGGTTGCAGGTAGCGTTCTA_8	0.568575483694741	0.0854596552326983
AGCGTGTTGCTCTGTACATCTACG_8	0.879096484536432	0.0506611154498672
AACTGAGCACCAATGCACGTCGTA_8	0.63195647295001	-0.00550076
ATCGCCATCTAGGTGATGGTCCTT_8	0.505728839426798	-0.033382
CATGGCTATTACCGAGACTGTGTC_8	1.5680219180852	-0.118036
CTTAGGACCGTACGAAGAGCTCAA_8	1.47975806883862	0.0414947918262311
TGTGACTGTTACCGAGGCTTAGCT_8	1.00110181646954	-0.0569492
ACTCCATCTGGAGTTGTCTGAGAG_8	1.04944156309304	-0.068234
GTCGAAGACGACCATTACATAGGC_8	0.63745766725666	-0.0717636
CGCTCTATATCGGTGTAACCTTGG_8	0.826517702413258	-0.054505
ACTGAGGTTTCAGGAGTCCGAGTT_8	0.80537304528516	-0.152118
AGTTCGTCCATTCGGTCAGTCTTC_8	1.18479183607759	0.0843139502194116
CATACCACCTCAGAGTTCTGAGAG_8	0.388758125576787	-0.116709
ACTCTCGATCGAACCACAGGTATC_8	0.852580519282983	-0.00372759
AGCGTGTTGTCTGATCCGGAATAC_8	0.521929589130572	0.102471972546473
TACGCTACAATGGACGCGAACTGT_8	1.08154314994413	-0.0641766
ATCGATCGCCAAGTTGGTCTAGGT_8	0.699159836381024	0.0260738962159315
GCACAACTGCCTTGTTCAAGGTCT_8	1.56779879823638	0.00567530650095052
TTGCGAAGTACCAGGAAACCTCCT_8	0.995235019287165	-0.1142
CTGATCGTATGGTTGCCACCACTA_8	1.34175163534743	-0.00280653
ATGCACGAGACGAATGGCCAGTAT_8	0.946287992813202	0.0391608595410542
TGAAGACGTGGAGAGTCGAGTATG_8	0.467633906566912	-0.103471
AGCGTGTTATTCGAGGCAGGTATC_8	1.01481096716072	0.0764609101420616
CGCTCTATCTCTACTCGCTTAGCT_8	0.720581974190228	0.354129865483841
ACTCCATCCGCTAGTAGATCGTAC_8	0.65515996016282	-0.117995
ACTCTCGAGAAGAGGTACCTTCTC_8	0.702001123652863	0.102603624036379
CCTGATTGTGAGGTGTCACCACTA_8	0.773895147279133	-0.0535866
CGACGTTAGTCAGTTGTTCAGCCT_8	1.15649935359027	-0.0457817
AGTTCGTCATTCGAGGCGATGCTT_8	0.602712648496735	-0.00182628
ATGACGTCCATTGCCTTCTGCTCT_8	0.62318243497357	0.119850668816871
CGACGTTAGATACTGGTAGGATGC_8	0.680747211125291	-0.0115936
CCTTGATCTACCAGGAAGGATCTG_8	0.670097041907038	-0.0299865
CGCATGATCAGTTCTGACCTTCTC_8	0.832493023376438	0.017491253805435
CGCTCTATCAGAATCGTCTGAGAG_8	1.05959900669824	-0.0578102
TGGCATGTGATGCACTACCATGTG_8	1.22688749641163	-0.0566855
AAGCACTGAGGAGGAATCTCCGAT_8	0.771842463482665	-0.0597289
GATTGCTCAAGGACACGCAATTCG_8	1.12160890736704	-0.0536707
ATCCAGAGCGATAGAGTGTGGTAC_8	1.16285254518774	-0.00107636
CCTTGTAGAATGGACGCTGGTTCT_8	0.454670234946945	-0.0284043
ACAGCTCAGCTGGATTACGTCGTA_8	1.35659480956389	-0.110828
GAAGTTGGTTACCGAGCACTGACA_8	1.2602780033077	0.0233996822356807
ATCGCCATGATGCACTTGTGGTAC_8	1.32692027686998	-0.0101006
CTTAGGACTTGGTCTCCTCTGGTT_8	1.70288965819445	-0.15379
ATCGATCGCAGTTCTGGTTCATGG_8	1.08639638675808	-0.0665839
GAGCAGTATAAGTGGCGCCAGTAT_8	0.750189308435376	-0.00429668
ACTCCATCTCTCGCAAGACAAGAG_8	0.449134001960304	0.0348841792893267
CCTGATTGGATGCACTCAGCGATT_8	1.54865504871026	0.0040698029021444
CGGTTGTTGTCCTAAGGAGCTCAA_8	0.769431438711155	-0.0028471
AACTGAGCAGTGCAGTAACTGGTG_8	0.634397489979966	-0.0362705
CGTGTGTAACCTAAGGAACTGGTG_8	0.975111345004693	0.00205741828485637
ATGACGTCTCTCTAGGCTAACTCG_8	1.2524200041469	0.0299810084509753
GATGTGTGGACTATGCTCTCCGAT_8	0.552868838627328	-0.15569
TTCCAAGGCAGTTCTGTGGTCCTT_8	1.96820072416709	-0.0228181
TAACCGGTAGGCTTCTTTAGGTCG_8	1.5475844776307	0.00396284189197885
ATATGCGCAGCTCCTAACTGCTAG_8	0.837551681543829	0.0235745476718604
ATCGATCGCTTGCTGTAGGATGGT_8	0.835668756212433	-0.0144873
GTTGTTCGTTCAGGAGACAGCAAC_8	0.587078023439756	0.0391472470892675
CTTCGACTTTACCGAGCATGGAAC_8	0.581490625354065	0.0447842664952683
TGCTTCCACTCAGAGTACGGTCTT_8	0.36720804250364	-0.0557755
GTTCTCGTAGTCGACAAACCGAAG_8	1.6127499716467	-0.101119
CCTTGTAGGACTATGCAACCTCCT_8	1.14993990471458	-0.0427356
TACGCCTTACCAGCTTCGATGCTT_8	1.14392884357141	-0.114169
GATGTGTGCAACCTAGGCTTAGCT_8	0.473284918199862	0.0231494137797259
GAACATCGACCAGCTTACTGTGTC_8	1.39281383141345	-0.159195
ATCGATCGAAGGACACACCTTCTC_8	1.30592105072205	-0.11583
TGGACTCTAGTGCAGTAAGGCTGA_8	0.81218433328373	-0.0835819
GCAAGATCAATGGACGTACACGCT_8	0.740726943698768	0.0695817642739898
TACGCCTTGTCAGTTGTTAGGTCG_8	0.800898885278923	-0.0106575
ACTGAGGTCCTACTGATGGTCCTT_8	1.33320764116136	-0.158561
CGACGTTAGTCTGATCCAGTCTTC_8	0.339181943713284	-0.106912
GTGAAGTGACCAGCTTTGTCCAGA_8	0.364202146282097	-0.00914601
GTGAAGTGGACTTAGGAACGGTCA_8	0.756835250803192	0.130224682124417
GAAGTTGGCTCTACTCTTAGGTCG_8	0.788160544338936	0.0335398684119245
ATCGATCGTGGAGAGTATGGAAGG_8	0.771165732000885	0.000907501894896079
CCGTAAGACAATCGACCCTTCCTT_8	1.02455214002806	-0.0179386
TACGCCTTCAACCTAGTTGACAGG_8	0.910005236853973	0.0852106082776885
CAATGTGGAGCTCCTAGTATTGGC_8	1.16018914389665	-0.116188
TGAGCTAGTGCAGGTACAGTCTTC_8	0.584137132361512	0.0808776842360416
CATGGCTACGATAGAGGCAATTCG_8	0.735831703997656	0.0788224452081289
CCGTAAGATACATCGGCTACAGTG_8	0.662202593669314	-0.0296041
ATCACACGTGTGCGTTTGCACCAA_8	1.13155356797835	0.0411607478512102
TTGCAGACCGTCAATGCATGGAAC_8	0.755043181657234	0.0836713848051807
AACCGTTCCAGTTCTGCAGCGATT_8	1.16860566028278	-0.04421
CTGATCGTGATGCACTTCTGAGAG_8	0.640279008877011	0.179907240630217
TACGCCTTCCAAGTTGTTAGGTCG_8	1.23046396551633	0.173154916102686
ATCCAGAGGCTGGATTCATCTACG_8	1.26733196058167	-0.000150577
GAGCAGTATGGAGTTGAACGGTCA_8	0.642440729428168	0.034631074255131
AGCACTTCTCTCTAGGTTACGGCT_8	1.29840626576102	-0.111961
GTTCTCGTCCAAGTTGTTGTCGGT_8	0.430920338536593	-0.0278752
ACGACTTGAGTCGACAGCTTAGCT_8	0.992200845480776	0.0400218730576755
ACCACGATCAGTTCTGTTAGGTCG_8	1.05442571736684	-0.0611489
GACGATCTTACGGTTGAGGATGGT_8	1.1074838983442	0.0662942625728983
ACTGAGGTATTCGAGGGCTGTTGT_8	0.732539669775425	-0.0124042
AGAACGAGTACATCGGACTGCTAG_8	1.04940479338259	-0.0381454
TGTGACTGGAGGACTTGATCGTAC_8	0.401962903280904	0.083666378905478
CCGTAAGAACCTAAGGTCAGACGA_8	0.943096772938061	0.00989400753867137
AACGTCTGGATACTGGAGGCATAG_8	1.1218379353047	-0.067977
TGAAGACGCTGACACAGCTTCTTG_8	1.43484532119868	-0.0231732
TTCCAAGGTTCAGGAGGACAAGAG_8	1.17138453725355	0.0263763019021191
ACTCTCGATCTAACGCGCTTAGCT_8	0.781505375901006	-0.018111
GTTGTTCGCGTACGAATTGTCGGT_8	0.739713317404527	-0.0223876
TAACCGGTGTAGAGCAAACCTCCT_8	1.17104668931778	-0.0422652
CAGTCCAATCTCTAGGGCGTTCTA_8	0.611918982665752	-0.0444889
CGGCTAATTTGATCCGCGTAGGTT_8	0.927880799387255	-0.0617739
GTCGAAGAACCAATGCCCATACGT_8	1.55622390824147	0.0262345588886159
ATCCGGTAGAGGACTTTTCTCTCG_8	0.959544565328044	-0.0782433
ATGCCTGTAGGAGGAACGAGTATG_8	1.0493950692736	0.110003324882867
ATGACGTCGTCAGTTGCATGGAAC_8	0.947656237683632	-0.0420288
AACTGAGCGCCATAACCGATGCTT_8	0.345199052772417	0.0160336484079032
CTTCGACTCCGACTATTGTGGTAC_8	0.945511089231901	-0.0757699
ACGACTTGTGCAGGTACTGGTTCT_8	1.28748726727593	-0.0685117
TTGCGAAGCGGATTGACTCTGGTT_8	0.887918305574974	0.0166337523239235
AGCGTGTTACTCGTTGCGAACTGT_8	0.933833037593911	-0.0746525
TTGGACGTCAGTTCTGCGAGTATG_8	0.933783868927767	0.048014486404194
GAATCCGAGAATCGTGCAAGGTCT_8	1.28599674217399	-0.106354
TCGCTGTTTGCCATTCTGGTCCTT_8	0.487807047456776	0.0757695062998649
GAGCAGTAAGGCTTCTGCACGTAA_8	1.32957015178705	0.0443665297203345
AGTGGATCAGCTCCTAGCTTAGCT_8	0.922252553949733	0.0805840039713195
GAAGTTGGGTCCTAAGGCACGTAA_8	1.51622267382325	-0.0800535
TGAGCTAGGTATGCTGACCTTCTC_8	0.383644365992625	0.135020126367486
GACGATCTTGGAGAGTGCTTAGCT_8	1.00001651653133	0.0840935819400181
ATCGATCGCGACCATTTTACGGCT_8	0.344512255995747	0.0638549503893887
ACGACTTGTAAGTGGCGTAGCATC_8	1.40387028581958	-0.101639
CGCTCTATAGTCTGTGCGTAGGTT_8	1.08792065294525	-0.0301194
CATGGCTACTTGCTGTGTATTGGC_8	1.28638486426486	-0.0291699
GTTGTTCGACGTGATGAACCTCCT_8	1.36679945859827	-0.0764722
ACGTTCAGCATTGCCTTCCGAGTT_8	1.0566240639259	0.0899340402101818
GACGATCTCATTCGGTTAGGATGC_8	0.872807893418229	-0.00574483
GCAAGATCGACGAATGTATCAGCG_8	0.687035296806244	0.00982059500694715
CTGATCGTACATTGCGCATCTACG_8	1.06702385054031	0.0518453830295722
GTCATCGACAATCGACCTCTGGTT_8	0.768589414137458	-0.0975576
TTGGACGTTACATCGGATTCTGGC_8	0.592402891212262	0.182091280960099
CAATGTGGTACATCGGTGGTCCTT_8	1.54388415299201	-0.159336
TGGTACAGCTTGCTGTATGGAAGG_8	1.4564733415951	-0.118783
ACGTTCAGCTAGGTGATTACGGCT_8	0.581637325394177	-0.0296984
GATGTGTGCGGATTGATCTGCTCT_8	1.20605584636605	0.0140839367290725
GAAGTTGGACCTAAGGGACAAGAG_8	0.963947750334117	-0.125372
AACTGAGCATCGGTGTGTAGCATC_8	1.37870225603845	0.0123960622633406
ACTCTCGATGGAGTTGGCCAGTAT_8	0.902918777862924	0.0534897763979819
CATGGCTACTCTACTCACGGTCTT_8	1.2519323665368	-0.0857081
TACGCCTTAATGGACGTGCACCAA_8	0.481205972776517	-0.0693041
TCAGGCTTCTGGAGTAAGGCATAG_8	1.4270723411738	-0.0182682
TCAGGCTTTCGAAGGTATGGAAGG_8	0.978966807044423	0.0749753424769746
GAGCAGTACCTACTGACTCAGCTA_8	1.19804384723075	0.07658633664988
TAACCGGTGTATGCTGATGGAAGG_8	1.14099863460571	0.0183430379181135
TACGCCTTACCAGCTTCAGTCTTC_8	1.3541700905786	-0.113443
ACGTTCAGGTCTCCTTAACGGTCA_8	1.21202775410019	0.101107643292488
CGGTTGTTTACCAGGACGAACTGT_8	1.28511374048698	0.00302768689834873
AAGCACTGACTCGTTGACAGCAAC_8	0.888811677493129	-0.0824944
CATGGCTAACCAGCTTAACTGGTG_8	1.21329372313879	0.0427937259833983
ATCGCCATTTGATCCGTCTCCGAT_8	1.92538324027836	0.0302950495049256
CTTCGACTAATGGACGAGGCATAG_8	1.11762892515477	-0.0630068
GAATCCGATGATCGGAACCATGTG_8	1.19994723046898	-0.0680562
GATAGGCTGTCAGTTGGCAATTCG_8	1.01786805177219	-0.166379
AGAACGAGGACGAATGCTACAGTG_8	0.603629548929849	0.0789358931380992
ATGCACGATACCAGGACATAACGG_8	1.06109467758618	0.00842829877774298
ATGCACGAGAATCGTGCTAACTCG_8	0.598576691577113	-0.061502
GAAGTTGGCTCATTGCAGTCAGGA_8	1.62925614045242	0.0119526012043889
AGTTCGTCGTCTGATCCTGGTTCT_8	0.559702046821933	-0.0195093
ACCACGATGAGATACGAGGCATAG_8	1.44010510614795	-0.13532
AGTTCGTCAGCTCCTACAGTCTTC_8	0.932699508416931	-0.0182916
GATTACCGGTATGCTGAAGAGCCA_8	0.966188783385804	0.120541772012836
CATGGCTATGATCGGAACCGCATA_8	1.10157846513204	0.0152775132322132
TTGCAGACAGAAGCGTCTAACTCG_8	1.40946678042143	-0.142397
CGGCTAATACCTAAGGCAAGGTCT_8	0.782409176334225	0.168465568562043
GTAGGAGTAGTCGACAGCCAGTAT_8	0.456371955819433	-0.0919061
TGCTTCCATTGATCCGTAGGATGC_8	0.507835833553507	0.048923527184215
CTTCGACTAGGAGGAACCAGTGTT_8	0.863838422759236	0.08024423737811
ATGCCTGTAGGTTCGAATGGAAGG_8	1.3374624610802	-0.018858
GTTGTTCGTGTGAAGCACCTTCTC_8	0.60040536924475	0.0276876869369717
GAATCCGAGATGCACTGCACGTAA_8	1.02924235731344	-0.0311301
GATTACCGCATTCGGTGTCTAGGT_8	0.990489924664382	0.00072044465336607
GAGACGATACGTGATGCCTTCCTT_8	1.23836578543919	-0.0154568
AACCGTTCTCTCGCAAAAGGCTGA_8	0.531290932872867	0.0164325116286904
CCTTGTAGCATTCGGTGTATTGGC_8	1.10149516380391	-0.0729594
ATCGATCGTCTCTAGGTGCACCAA_8	0.62172116227044	-0.0777647
GATAGGCTTACATCGGCAGCGATT_8	2.28563587285523	0.144114065573891
GTCGAAGAGAGATACGATGGAAGG_8	1.12832759131787	-0.0444792
TTGGACGTAGTGCAGTCACCACTA_8	0.594404838141608	-0.130031
GATTACCGTAAGTGGCATTCTGGC_8	1.25402910748063	-0.0896571
TCGCTGTTACGTGATGGTGTTCCT_8	1.4617953852958	-0.0764767
CAACACCTCTTGCTGTACCATGTG_8	0.768514141737505	-0.020044
CCTTGATCTTACCGAGTACACGCT_8	0.479182270910773	-0.127134
AGAACGAGGCCATAACGCACGTAA_8	1.37899009408886	-0.103844
CTTAGGACGAGATACGCCATACGT_8	0.751572192289793	-0.0175213
AGAACGAGGCTCTGTATTCAGCCT_8	0.774183400248907	0.156783182433686
CGGTTGTTACCAGCTTGCAATTCG_8	1.20348592307495	-0.0586589
CGTGTGTAGTCGGTAAAACGGTCA_8	0.94314211210154	0.0416907856346904
GCAAGATCATCGGTGTTGGTCCTT_8	0.635555662093982	0.00920568295490723
GCAAGATCCTCATTGCCATGGAAC_8	1.21046676983928	-0.0712699
TGCTTCCAGTAGAGCAACTGTGTC_8	1.09283764934499	-0.0106332
CAACACCTTTGGTGAGCGTAGGTT_8	0.422789046414733	0.17341154295332
CGACGTTAACTCGTTGGTTCATGG_8	1.04287894482962	0.0048582090093556
AGCGTGTTACCAATGCACTGTGTC_8	1.49936390459482	0.0895575476696588
AGAGTAGCCCTACTGATACACGCT_8	0.622513772533669	-0.0807508
ATCGCCATTACCAGGACAGTCTTC_8	0.772681874875756	0.0440970166193822
CCTTGTAGGATAGCGAGCTGTTGT_8	0.969276677682086	-0.037709
CCTTGATCGAACGCTTCCTTCCTT_8	1.0243156790653	-0.116952
GTAGGAGTGTCTGATCCAAGGTCT_8	0.817806520609065	-0.055799
TCAGGCTTGTATGCTGGCATACAG_8	1.44306020156043	-0.0505473
CGGCTAATGTCTGATCCAAGGTCT_8	1.67471837091724	-0.0730687
CCTTGTAGTGTGAAGCCGATGCTT_8	1.05948331538283	0.023644788385446
CACTAGCTGAATCGTGTCTGAGAG_8	1.19942939168456	-0.0244566
GATCGAGTTCCGTATGACGGTCTT_8	1.29082927688376	-0.0765247
TGGACTCTTCTCTAGGATTCTGGC_8	1.28411036772598	0.221308131974263
ACTAGGAGACGATGACGCTTCGAA_8	0.879010436247175	0.00134337100488496
AACGTCTGAGGTTCGACGATGCTT_8	1.17442302319943	-0.0799153
AGAACGAGCGATAGAGCAAGGTCT_8	0.977725680381207	0.0534956784625057
GTGAAGTGCGCTAGTATGCCTCTT_8	0.707270079386619	-0.0757456
CGTGTGTACCTACTGAACGTCGTA_8	1.16203476215615	0.0137391945047467
ATATGCGCCCAAGTTGCCAGTGTT_8	1.03041010446051	-0.0901765
CGCAATCTAATGGACGCACTGACA_8	0.885284596355178	-0.0878271
GTGCCATAGAGATACGTGTCCAGA_8	0.880525186385011	0.0436174385333457
AGCACTTCTCCGTATGACTGCTAG_8	0.942684747826618	0.0391969786072565
GTGCCATACTTACAGCAACCGAAG_8	0.882630145990456	-0.110041
ATATGCGCCAGTTCTGTGCCTCTT_8	0.741814671734453	0.187206503012401
CCTTGTAGAATGCCTCTTCAGCCT_8	1.24999857597553	-0.0277084
GACGATCTCTCATTGCTTAGGTCG_8	1.10527006816057	0.17877916170296
CCTTGATCACCTAAGGCACTGACA_8	0.664007590197849	0.0228320324927636
TCGCTGTTGTCTCCTTCTCTGGTT_8	0.885138297348335	0.0875846541491814
CAACACCTCGGATTGATTCAGCCT_8	0.666475516459718	-0.0900774
AGTTCGTCAGGAGGAAACTGTGTC_8	0.738663084790329	0.109600407732318
CACTAGCTTCGAAGGTTGTGGTAC_8	0.954616323262107	-0.117287
GATTGCTCTGTGCGTTCCTTCCTT_8	1.44615030413599	0.000617912688152894
GAATCCGAGTAGAGCACATGGAAC_8	0.504368406683256	0.0273297232995743
AGCACTTCCGTACGAAGCATACAG_8	1.10424477893295	-0.107068
GCTATCCTCGACCATTCTAACTCG_8	1.15334087317046	0.108806878174324
CCTTGATCCCAAGTTGGCTTAGCT_8	0.563733805508105	-0.0200388
ATCACACGCGCTAGTACTGCGTAT_8	0.704306361730558	0.182357796917605
GAGCAGTACGCTAGTACATAACGG_8	1.13055528845427	0.0360762643767547
GTTACGCACTCAGAGTCTAACTCG_8	1.06602813065128	0.0698153398094807
CACTAGCTAAGGACACCACCACTA_8	0.907296232575149	0.108842759164814
AACTGAGCGAATCGTGGCGTTCTA_8	1.0386347552957	0.0924184335063775
GTCGAAGATGATCGGAAACTGGTG_8	0.873184336097945	0.00804657168251752
AACTGAGCAATGGACGTATCAGCG_8	0.984749428390771	0.126101002468021
GAACATCGTCGAAGGTCCTTCCTT_8	0.433841893367318	-0.0373461
GACGATCTATCGGTGTCACTGACA_8	1.55219869878019	0.0826290096952123
TTGGACGTCTTACAGCTTGACAGG_8	1.05511009121089	0.0361741254117748
CAACACCTGAATCGTGCATGGAAC_8	1.0738590767673	0.0190154503060884
CAATGTGGTGCAGGTATGTGGTAC_8	1.3559189488471	0.154325896327195
AGTTCGTCCTTGCTGTCGATGCTT_8	0.467199484730908	0.0211003131311265
GACGATCTCAACCTAGCCATACGT_8	0.886689893523706	-0.0928928
GTAGGAGTCTAGGCATGTGTTCCT_8	1.17578787711411	0.11866785693691
ACTCTCGACCGACTATTCACGTTC_8	0.877882415880267	-0.172465
GTCGAAGACGAGACTAATTCTGGC_8	1.5493669701496	-0.060271
TTCGTTGGACGTGATGGATCGTAC_8	0.419708684784828	-0.00384033
CGTTGCAACTATCGCAACCTTCTC_8	1.17213556850464	0.159207665516144
ACGGAACAACATTGCGAACTGGTG_8	1.00895772268474	0.0683072963859619
GATTGCTCCGTACGAATTCAGCCT_8	0.851010749602257	-0.00840044
ATGCCTGTCTGACACACTAACTCG_8	0.795946943462631	0.0370200021646327
CCTGATTGGCTCTGTACGAACTGT_8	0.349326039617623	0.131447487826949
CACCTGTTACGTGATGCAAGGTCT_8	1.25944788796549	-0.114395
CTTCGACTAAGGACACACCGCATA_8	1.35787955403214	-0.0675224
GATAGGCTCAGTTCTGGCATACAG_8	0.999033067663247	-0.177003
ACAGCTCACAATCGACACCGCATA_8	0.74939722454508	0.00157966407145069
AGCACTTCGTCTCCTTTGTCCAGA_8	0.744679842104559	0.0504363760161363
ATATGCGCAAGGACACCACTGACA_8	1.41590273980955	-0.00143072
CGCTCTATCGGATTGACTAACTCG_8	0.972964465585762	0.0314172213168226
TATCGGTCTCCGTATGAACCTTGG_8	2.18587563847366	-0.116446
TACGCTACAGGTTCGACTGCGTAT_8	1.0034674734292	0.013846833651466
GATTGCTCCAATCGACACCGCATA_8	1.04292102031649	-0.00871284
GACGATCTTACGGTTGCATGGAAC_8	0.747909723749727	-0.129998
GTCGAAGACGAGACTACAGGTATC_8	1.37500843248196	-0.087259
GCGTCATTGTCTCCTTTGTGGTAC_8	1.48600465094706	-0.160155
CAGTCCAACATTCGGTCAGGTATC_8	0.690450390308002	-0.129973
TTCCAAGGCAACCTAGGTTCATGG_8	0.919285744451217	0.0649098592413506
ACTAGGAGAGGCTTCTGCACGTAA_8	1.50229999680252	0.0375490505877053
AGAACGAGTGGAGTTGACTGCTAG_8	0.950161290775313	-0.00280776
CGTGTGTATCGAACCAGCTTAGCT_8	1.87563	-0.0470886
CGCATGATGTCGGTAACGGAATAC_8	1.44317666460835	-0.0275294
AGAACGAGGACTATGCTATCAGCG_8	1.64117542000582	0.182412716653813
GTGAAGTGGATGCACTTTACGGCT_8	0.895508876503013	0.141712760927801
AGAGTAGCAGTCTGTGCAGGTATC_8	0.898237416415891	-0.0795912
CTTAGGACTGTGAAGCTCGTAGTC_8	0.957999301025125	-0.0323862
GATTACCGGAGATGTCAGTCAGGA_8	1.53547598235605	-0.00648762
CGGTTGTTTACATCGGACTGTGTC_8	1.81585534571794	-0.00803274
GCAAGATCACCAGCTTTCTGCTCT_8	0.831439799556817	-0.0283414
ATCCGGTAGACGAATGCGTAGGTT_8	0.878836089891265	0.00946483969625936
AAGCACTGACATTGCGCTCAGCTA_8	0.521526904058329	0.0228507329065147
CCTTGTAGCCGACTATCCAGTGTT_8	0.823884956881458	0.284372583476567
TGAGCTAGCAGAATCGGATCGTAC_8	1.86961825681855	-0.0751177
TGAGCTAGTTGGTGAGAGGATCTG_8	0.819663613553726	-0.102465
ATCGATCGGATAGCGAATGGAAGG_8	0.64190655982586	0.00328078418004468
GTTCTCGTCCGACTATTCTGCTCT_8	1.10699836393348	0.0659118706761256
AGCACTTCGCCATAACTCTGCTCT_8	1.09841303554274	-0.0396905
ATCGATCGTCTCTAGGTTGACAGG_8	1.21933803469114	0.126892853618006
TTCGTTGGCGCTAGTACAAGTGCA_8	0.984450411208298	-0.0846953
GTTACGCATAAGTGGCCCATACGT_8	2.02144694472454	-0.0949946
AACTGAGCTTGATCCGCTTCACCA_8	1.32539809565676	-0.0932391
ACTGAGGTCTATCGCAGCGTTCTA_8	0.656150528823639	-0.0846138
CTGATCGTAGTCTGTGCAAGTGCA_8	1.27633910083359	-0.140669
TGGTACAGACCAGCTTCACTGACA_8	1.30401103343531	-0.00850074
AGTTCGTCCGGATTGACAGGTATC_8	0.704673466804474	-0.0619919
GTTACGCATTACCGAGTCTGAGAG_8	0.765100798321291	-0.046978
ATGCACGAGAGGACTTTGTGGTAC_8	0.854853835425513	0.0977838312636231
CAGTCCAACTATCGCACTCTGGTT_8	0.638193670472792	-0.208669
CTGATCGTCGTCAATGCTTCGTTC_8	1.33817580729326	-0.0471231
GAATCCGAGACTATGCTCACGTTC_8	1.18378821901933	-0.0624351
TTGCGAAGGTCGGTAATTGACAGG_8	1.87922517810698	-0.0510432
TGGACTCTTGCAGGTACCATACGT_8	1.22069189569753	0.124238664138505
ACGACTTGTTGGTGAGTTGACAGG_8	1.24975493753661	-0.00631526
AGCACTTCAGGTTCGAACCATGTG_8	2.16598295016682	-0.0702011
TACGCTACCGTTATGCCAGCGATT_8	1.48239275131168	0.132600916509622
CTTGTCGACAACCTAGATTCTGGC_8	1.85579149263745	-0.124255
GTCGAAGATGTGCGTTGTAGCATC_8	0.896477870481385	-0.152643
GCGTCATTTACGGTTGCCTTCCTT_8	0.902021725799105	0.0367896679415328
TCAGGCTTAGTCTGTGCGAGTATG_8	0.849821660434459	-0.0700976
ACTAGGAGGAATCGTGTGTGGTAC_8	0.666102251798708	-0.188286
GAAGGAAGCGTCAATGGACAAGAG_8	0.558317247159214	0.12711456495689
CAGTCCAATCTCGCAACTCAGCTA_8	1.07839855669092	-0.0416033
CGCTCTATCTCAGAGTTAGGATGC_8	1.45162226119648	-0.12792
TACGCCTTGTCCTAAGGCTTCTTG_8	1.47772001837957	-0.117338
CTTAGGACGAATCGTGTTGACAGG_8	1.98075828242791	-0.0951996
ACGGAACAAAGGACACAACCGAAG_8	1.12474881399672	-0.0498364
ATCCAGAGGATAGCGATGCCTCTT_8	1.22257223244744	0.0561475867982031
GTCGAAGACTTGCTGTGTATTGGC_8	1.75124920709218	-0.11747
CACTAGCTTCGAAGGTCGTAGGTT_8	1.46581314796922	0.0273752737758428
ACGGAACAAGTGCAGTACCATGTG_8	1.8926701092966	-0.0435013
ATCACACGGACTTAGGACAGCAAC_8	0.696849450886549	0.00440529159714428
CGCATGATAGCTCCTAGACAAGAG_8	0.631735564460498	0.0774775475334269
TGAGCTAGTTACCGAGACCTTCTC_8	0.69642144101763	0.123257972394808
AGCGTGTTTAGTTGCGGCAATTCG_8	1.04982232068844	0.0957185348319132
CACTAGCTATGGTTGCAACTGGTG_8	0.922427640600458	0.103853536780956
GATCGAGTCAATCGACCAAGGTCT_8	1.51858129083028	-0.168879
GATTACCGTGCCATTCAAGGCTGA_8	0.603840743629197	-0.04454
GTCGAAGAGAGGACTTCAGCGATT_8	1.45093745705923	-0.0991755
ATCGCCATCCTACTGACCATACGT_8	1.19705437152153	0.128617466116878
ACTCCATCCTAGGCATGCATACAG_8	0.554531006662452	0.0222675409003357
CGTGTGTAGTCTCCTTGTTCATGG_8	1.51325103774449	-0.0709802
GATAGGCTCGTACGAATCTCCGAT_8	1.19349537124627	-0.107679
CTGTTGACCGGATTGAGCTTCGAA_8	1.12720793975454	-0.123286
ATATGCGCTGATCGGATAGGATGC_8	0.693680882733575	0.0907149463480678
GTTCTCGTATTCGAGGCAAGGTCT_8	1.41632569446506	-0.00488508
GCAAGATCTCGAACCAACGTCGTA_8	1.15857128599219	0.049358308010748
AGCACTTCTTACCGAGCATCTACG_8	1.20707250109974	0.0112733119830828
ACGACTTGGACGAATGTTGACAGG_8	1.07215007454742	-0.0764361
TATCGGTCACCAGCTTTGCCTCTT_8	2.00635158351519	-0.0643276
TGGTAGCTTCTCTAGGCTTCGTTC_8	2.16630743980981	0.0398372325483094
CAACACCTGTCAGTTGTCTCCGAT_8	0.926048714224849	-0.00393161
CATACCACTTGGTGAGTCTGAGAG_8	1.76693812211436	0.0311929170424909
ATGCCTGTTGGAGTTGTCTGAGAG_8	1.81657	-0.0935499
GAATCCGAGATAGCGATAGCCGAA_8	1.37212295573088	-0.050495
TGGTAGCTAGGTTCGACTGCGTAT_8	1.50269583316318	-0.0947382
TTCCAAGGAGAAGCGTCTGGTTCT_8	1.25920456094324	0.062007401832723
CGCAATCTTCTAACGCCGTGTACT_8	2.18258269440869	-0.0907132
CGCAATCTCAACCTAGCATCTACG_8	1.62623462176081	-0.0453494
CTTAGGACCTCTACTCCTCTGGTT_8	2.07296489793769	-0.0708269
CAACACCTCTCTACTCTGCACCAA_8	1.50340111097372	-0.0546574
CGACGTTATCTAACGCAGCAGATG_8	1.88510004012474	-0.0835919
CACTAGCTGACTATGCTCGTGGAT_8	0.833670052804331	-0.0437572
TTGGACGTCGTACGAAACGGTCTT_8	2.05974404162745	-0.0458717
GATGTGTGACATTGCGCAAGGTCT_8	1.97423033303436	0.00981789141594089
GATGTGTGATGGTTGCAGGCATAG_8	0.640327896139828	-0.111183
GCTATCCTCCGACTATAGGATCTG_8	2.02401605933136	0.0138487159062857
GTGCCATAGTCTGATCACCATGTG_8	2.37784437903005	0.00114803813204675
CGCTCTATGACGAATGTCCGAGTT_8	1.08995717388975	-0.00489183
ACTCTCGAACCAGCTTTAGCCGAA_8	2.23982329582577	-0.127154
CACTAGCTGACTATGCTGTCCAGA_8	2.1921796388725	0.0193215920686192
ATCCGGTACGACCATTGATCGTAC_8	0.764568783904762	-0.106854
GCAAGATCACGTGATGTATCAGCG_8	2.13383236107001	-0.0637932
GTTGTTCGGACTATGCTCTGAGAG_8	1.06206632396973	-0.0540153
AGCACTTCAATGGACGCAGGTATC_8	1.0640455664655	-0.124118
TTGCAGACGAGGACTTTTCTCTCG_8	0.824174207662741	-0.0559777
ATCGATCGAGAAGCGTAACTGGTG_8	1.49422458868303	-0.067276
GACGATCTGAGATGTCCTACAGTG_8	0.848646289369684	0.00949119047071553
AGCACTTCTAGTTGCGGCATACAG_8	1.04774867154316	-0.0459393
TTCCAAGGCGTCAATGCGTGTACT_8	0.888759731778479	0.167484744951978
CGGTTGTTCATTCGGTTTACGGCT_8	0.46493247245888	0.0999398823047458
TGAAGACGACGTGATGTCGAGTGA_8	2.05000223421543	-0.072029
ACAGCTCAGAGATGTCTCGTGGAT_8	0.923381777413006	-0.0527369
TACGCTACAGTCGACAGTAGCATC_8	1.91164663087512	0.0591437278263941
TAACCGGTCGTACGAATTACGGCT_8	2.09935197227884	-0.106688
CTGTTGACTAAGTGGCCATAACGG_8	1.7321314206802	-0.0663376
CGTTGCAAAATGCCTCGCTTCTTG_8	1.27999368477097	0.121951526756723
GATGTGTGCATTCGGTTACACGCT_8	2.26207535207471	-0.0168385
GTTACGCATGCAGGTAACCTTCTC_8	1.0604004404608	-0.137608
GCAAGATCGCCTTGTTGCACGTAA_8	0.580474225464978	-0.0454059
GTTGTTCGATTCGAGGAGTCAGGA_8	1.30232447018797	0.0147757514137412
CATGGCTACGTACGAATCGTGGAT_8	1.93738835730724	0.0861313863464949
CGGTTGTTCTGGAGTATCCGAGTT_8	1.40153912953266	-0.0172839
CGTTGCAAGAACGCTTACCGCATA_8	2.28791204341006	-0.0391746
ACGGAACACATTGCCTTGCCTCTT_8	0.649334941537293	0.186204669915184
CAATGTGGTTGATCCGGCTTAGCT_8	1.94751548058766	0.0485823483015187
GTTGTTCGGACTTAGGAGGCATAG_8	1.8074430393938	0.124321106421461
CGGCTAATGATAGCGACGAGTATG_8	0.777474611957736	0.0377526481256456
AGAGTAGCCTAGGTGAGAGCTCAA_8	2.05249454743157	-0.0376967
CACTAGCTGAATCGTGCTCAGCTA_8	2.10637462204402	-0.0729269
CGCTCTATGCTCTGTATCAGACGA_8	2.27606870149391	-0.116947
ATGCCTGTGTCGGTAATTCTCTCG_8	1.66657223737516	-0.0354568
AGAGTAGCGAATCGTGACCGCATA_8	1.73767177741647	0.0458515589678506
CGCTCTATTTCAGGAGCTAACTCG_8	0.718857152153456	0.0286791538610791
GAGACGATGTCAGTTGCATCTACG_8	1.85587141064802	-0.162592
ATGCACGACCGACTATAAGAGCCA_8	1.70036143734655	-0.0768704
CGCATGATACCAGCTTCAGTCTTC_8	1.37708876740089	0.00103736652848319
GAGCAGTATGAGGTGTACAGCAAC_8	2.27766176691128	-0.100855
CTTCGACTCGTACGAAAAGAGCCA_8	1.70529122490059	-0.0140758
ATCACACGTCTCTAGGGTATTGGC_8	1.23016142918215	-0.031203
ATGACGTCGAAGAGGTTCAGACGA_8	1.2289582764426	0.0507295246870833
GAGCAGTATGGAGTTGGCTTCGAA_8	2.2929117188512	-0.0837002
CAATGTGGAAGGACACAGGCATAG_8	2.21049783136627	-0.0617493
TGGCATGTTCTCGCAAGATTGGAG_8	1.49713994047867	-0.0812707
GATCGAGTTGGAGAGTTGCACCAA_8	2.36357649879082	-0.0275067
GTTGTTCGGCTCTGTAATGGAAGG_8	1.30057019169862	-0.0218439
CGGCTAATGAAGAGGTGAGCTCAA_8	1.21274448553307	-0.088139
AGCACTTCTACATCGGGCAATTCG_8	0.941203686179798	-0.0957813
TAACCGGTACATTGCGCAAGGTCT_8	0.670765277077375	0.215568116186156
GTTACGCACGCTAGTATCTGCTCT_8	1.73225134671867	-0.0321119
ATCGCCATAGGTTCGAATGGAAGG_8	1.50801993956592	-0.00189816
CGGCTAATAGTGCAGTTGGTCCTT_8	1.08829679633624	0.00261207490593676
AGCACTTCCCTACTGAAACGGTCA_8	1.01751608705381	0.0608339717049287
CTTGTCGAAGAAGCGTGTGTTCCT_8	1.04783374467602	0.0237291221185897
ACGTTCAGCGGATTGACTTCACCA_8	0.803694395427692	-0.0622681
GATGTGTGAAGGACACGACAAGAG_8	2.52643931187637	-0.0136415
GCTATCCTCAGAATCGCCATACGT_8	2.37666568164094	-0.0613839
TGGTACAGAATGCCTCGCTTCGAA_8	1.78200620620458	0.00888434639206326
ATGACGTCAGTGCAGTCGGAATAC_8	0.886525246973516	-0.0328347
GAACATCGCAGTTCTGGCTTCGAA_8	1.70583871821431	0.0196371717258662
GATGTGTGGCCTTGTTTTACGGCT_8	2.28820212456439	-0.108517
ATCCGGTAACATTGCGGTATTGGC_8	2.23239245106302	-0.0236333
GTTGTTCGAGTCTGTGCAAGCAGT_8	1.17782628746504	0.0603635523007982
CTTCGACTTGTGCGTTTCAGACGA_8	0.821581714706821	0.245609965863565
ATCACACGTACATCGGACTGTGTC_8	1.88811439880859	-0.0812392
ATCCAGAGGTCGGTAATGCGTAGA_8	0.63657175786349	-0.029691
CACCTGTTGCCTTGTTGCTTCGAA_8	0.772163259089726	-0.0199832
CCTTGTAGTGATCGGACAGTCTTC_8	1.45197489427042	0.064389195871535
CCGTAAGAACCAGCTTTTACGGCT_8	2.40215256820456	-0.0306863
GATAGGCTCGTACGAAGATTGGAG_8	1.46655754630847	-0.047622
AGTTCGTCCGTTATGCTGGTCCTT_8	1.14961559339403	0.0122820265356629
TGTGACTGCGTACGAAACTGTGTC_8	1.71028132695585	-0.101732
CGGCTAATCAACCTAGCTGGTTCT_8	0.833423585738063	-0.110451
GTGCCATATTCAGGAGGTGTTCCT_8	1.03829134442589	0.00822422177160745
CTTGTCGAGCTGGATTCGTGTACT_8	1.44337054775173	0.207808389110851
GTTGACCTACGATGACTACACGCT_8	1.88062549922419	0.13385293854895
GAACATCGCTCTACTCGTCTAGGT_8	1.59974290099216	0.0599921898922075
GATTACCGGAGATGTCACCTTCTC_8	0.947387531477914	-0.105474
CAGTCCAACAATCGACCGAACTGT_8	1.86347070203916	-0.0292029
ATCCAGAGACGATGACTCTGAGAG_8	1.38634013573337	-0.0911526
TTCCAAGGCCGACTATATGGAAGG_8	1.37455226305766	-0.0222417
TTGCAGACCCGACTATACCATGTG_8	1.72936091016938	-0.0735161
CATACCACCACAAGTCCCATACGT_8	0.708537583612365	-0.0930969
GTTCTCGTTAGTTGCGCATAACGG_8	1.90335585399575	-0.0468847
ACGACTTGGACTATGCTTCTCTCG_8	0.96650618758669	-0.0508478
GAAGTTGGAGGTTCGAGCAATTCG_8	0.895954479287745	-0.0909873
TGCTTCCACAGTTCTGTCCGAGTT_8	0.893863204677994	0.000617661231278432
TGGTACAGGTCCTAAGTGTCCAGA_8	0.649869145126472	0.0181827585089203
TGGTAGCTCAGTTCTGTGGTCCTT_8	0.746950823074104	-0.119018
AGAACGAGATCGGTGTCTCAGCTA_8	1.91103718521107	-0.109813
TACGCCTTGTCCTAAGTTCTCTCG_8	0.945474555633883	0.267755727985111
GTTCTCGTAGTCTGTGGCGTTCTA_8	1.87376490336943	-0.0537912
ACTGAGGTTGGAGAGTTGTCCAGA_8	1.80847300174423	-0.13333
CGCAATCTTCCGTATGCTCTGGTT_8	2.35616446416931	-0.0352028
TGGTAGCTACGTGATGTCGAGTGA_8	1.00978292987861	-0.141181
GAGACGATTCTAACGCTGCCTCTT_8	0.731767371638387	-0.046816
AGAACGAGGTCGGTAAACATAGGC_8	2.25172622914311	-0.0558849
ACTAGGAGTCTAACGCCTACAGTG_8	2.26325881566922	-0.0633159
ACTCCATCGCCTTGTTCGTGTACT_8	0.533368546682842	-0.0845004
TGCTTCCATCTAACGCTCTGAGAG_8	1.01592517453264	-0.0726152
GTGCCATATCTAACGCAGGTCACT_8	0.711282785643837	0.150399510540714
GATGTGTGGATGCACTTGTGGTAC_8	1.42086328755372	-0.0509195
ACAGCTCAAGTCTGTGAGGCATAG_8	2.37719861033683	0.00393179450439066
GTTCTCGTGCTGGATTGACAAGAG_8	2.02511795045242	-0.0280379
TGAGCTAGCAGTTCTGGCCAGTAT_8	1.94950430497067	-0.0937206
TGCTTCCAGTAGAGCAAACTGGTG_8	0.801195966185104	-0.0411675
GAGCAGTATAAGTGGCCCATACGT_8	2.48654755769424	-0.0402583
GATGTGTGGACTATGCGTTCATGG_8	1.67846872932457	0.0501833769232581
ACAGCTCAAGGTTCGATCTGCTCT_8	1.65191920352904	0.0840191119845081
CAATGTGGGAATCGTGGTGTTCCT_8	1.43958916474482	-0.0781984
GCTATCCTCTATCGCACGGAATAC_8	2.10044165616094	-0.0477518
CCTTGATCGTCAGTTGCTTCGTTC_8	0.811593595864756	0.0247799453870987
CCTTGATCCATTGCCTTCTGCTCT_8	1.20039220157946	0.0946980715987345
ATCACACGTCGAACCATTGACAGG_8	0.763168051123854	-0.0614047
CCTTGTAGTGGAGTTGCATCTACG_8	1.41779485746243	-0.0431702
ACTCTCGATCTAACGCTTCAGCCT_8	2.44308337812164	0.0248342338250829
ATGCCTGTGCCATAACAACCTTGG_8	1.63817602079868	-0.0162313
CTTAGGACTTACCGAGGCTGTTGT_8	0.655438173000089	0.0744451353132131
GATCGAGTACCAATGCTTCAGCCT_8	0.949343310713982	-0.0615178
GTCATCGATCCGTATGCAAGCAGT_8	0.83059422825836	-0.0590461
TGTGACTGTTGATCCGGTTCATGG_8	1.14839422848176	0.0338534422615137
TGGTAGCTGCTCTGTACTCTGGTT_8	2.33647413895359	-0.0909528
CGACGTTAACATTGCGAACGGTCA_8	1.3754476379253	-0.0907124
TGCTTCCACTCATTGCCTTCACCA_8	0.843913760745583	-0.112773
ATGCACGATGATCGGATTGACAGG_8	1.22890320376763	0.125411584747673
CGTGTGTAACGATGACCGTAGGTT_8	1.3671893690573	-0.035695
GATTGCTCAGGTTCGAAGGATGGT_8	2.37388745707489	-0.0115343
TCGCTGTTTGAGGTGTTGCCTCTT_8	1.04217171233878	-0.13037
CCGTAAGAGTCGGTAATATCAGCG_8	1.10462666480272	0.0760201711366099
CGTGTGTAGATGCACTTGTCCAGA_8	2.16855113888063	-0.114214
CCTTGTAGAGTGCAGTAAGGCTGA_8	2.1645414424455	-0.0429702
GTTGACCTTGTGAAGCTGTGGTAC_8	1.12556676706862	0.03052638897168
CACTAGCTAGAAGCGTACCATGTG_8	2.31076428190565	0.00722106592981143
GAGACGATTTACCGAGGCGTTCTA_8	1.76601520272808	-0.0985879
GTAGGAGTCACAAGTCCAGCGATT_8	1.32725	0.08250131242137
GTGAAGTGCTGGAGTATTAGGTCG_8	1.9181202959696	-0.0605287
TGGACTCTTAGTTGCGCTACAGTG_8	1.3937189560471	0.0415241888315338
ACTAGGAGTGAGGTGTCAAGCAGT_8	1.45755831411478	-0.0706452
TACGCTACTCTCTAGGTGCACCAA_8	1.0885034334458	0.0535704732522663
TTCCAAGGAGTCGACAGATTGGAG_8	2.18527776546992	-0.100352
ACTCTCGACATTCGGTAGGATCTG_8	0.778803973355444	-0.0168287
CAACACCTGATACTGGTTGTCGGT_8	1.60189231360394	0.0263017545460595
GTTGACCTACCAGCTTTCCGAGTT_8	0.861542242417965	-0.109614
ACCACGATGAACGCTTCACTGACA_8	2.20667201400398	-0.0549531
TAACCGGTTCCGTATGGCTGTTGT_8	0.928533828192032	-0.0729443
TTCCAAGGCAGTTCTGCGTAGGTT_8	1.26923932965648	-0.00683065
GTTCTCGTGAAGAGGTTCGTAGTC_8	1.52927297797943	-0.0088643
TGGCATGTCAACCTAGACTGTGTC_8	0.591878971174758	-0.0970707
CATGGCTACGGATTGATGGTCCTT_8	2.19201147688302	-0.0820779
CGCATGATCGCTAGTAGCATACAG_8	2.08412119012639	-0.145732
CGACGTTAACATTGCGAGTCAGGA_8	2.20235322820419	-0.0725397
CGCTCTATAAGGACACTGTGGTAC_8	2.18857649722755	-0.112189
CGTGTGTACGTCAATGACGTCGTA_8	1.6572073271997	0.00498259861122596
AGCGTGTTGTCAGTTGGCTTAGCT_8	1.73032824128659	-0.16548
GAGCAGTACGATAGAGCAGTCTTC_8	0.859353576207514	0.046990404802262
ACTGAGGTGTAGAGCACGGAATAC_8	2.16646387498257	-0.0407476
TTCGTTGGAATGCCTCTGTGGTAC_8	1.36651	-0.0440392
GTCATCGAGCCTTGTTTCGTGGAT_8	1.51904101169508	0.0502453093224174
TCGCTGTTTACCAGGACGTAGGTT_8	1.54411115237986	0.0250889866215676
ACGGAACAGAGATGTCTTACGGCT_8	0.769289905994703	-0.0846446
TCAGGCTTTAAGTGGCAACGGTCA_8	1.75280953354563	0.0587342827002243
TACGCCTTAGAAGCGTCTTCACCA_8	1.21925899441347	0.0502795763121653
AACTGAGCCTGACACACTGCGTAT_8	0.71066817140766	-0.120451
CAATGTGGTCGAAGGTAACCTTGG_8	0.855804488988008	0.00627249020137569
GAAGGAAGGCCTTGTTTCCGAGTT_8	1.84380119740425	-0.0947466
GTTGACCTCATTGCCTAGGATGGT_8	1.47147082546044	-0.043569
CGGTTGTTCTTACAGCGATCGTAC_8	0.661551315703826	0.0171068214442945
AGAACGAGTCTCGCAACGAACTGT_8	1.69270351210352	0.100471926569974
GAGCAGTAACCTAAGGTCAGACGA_8	1.34011879104144	-0.0454439
GAGACGATGAAGAGGTTCAGACGA_8	1.09617322154214	-0.0767301
ATCGATCGGATACTGGAGCAGATG_8	1.78330594476259	-0.0252626
GTTCTCGTAGGCTTCTACTGCTAG_8	2.24920595257387	-0.0614687
ATATGCGCTTGATCCGTACACGCT_8	0.417178971617989	0.00427428136746419
ATGCCTGTCAGTTCTGTCTCCGAT_8	2.41371257854016	-0.0568486
CAATGTGGCACAAGTCCAGGTATC_8	1.91981591102783	0.0257164706483534
GATGTGTGTGGAGTTGTTGACAGG_8	1.21181831226317	-0.0122398
ATGCACGAACCAGCTTTGTGGTAC_8	2.26259977708913	-0.0432933
GCAAGATCAGAAGCGTTGGTCCTT_8	2.13345981226494	-0.0318855
CACTAGCTGAGATGTCCATCTACG_8	1.8433224413449	-0.0541367
CGTTGCAAACATTGCGAGTCAGGA_8	1.73111080050751	0.02559901562025
ACTCTCGACTGGAGTAATTCTGGC_8	0.747002286683295	-0.0393459
GTTGACCTATTCGAGGCATCTACG_8	2.30358599844777	-0.013879
GTTACGCAGCTCTGTATCCGAGTT_8	1.62838071572765	-0.104898
ATGCACGACAATCGACGCTTCGAA_8	1.39324361028194	0.00462657444232001
AACGTCTGGTCTCCTTACATAGGC_8	1.32128536948353	0.0155496363983735
TTGGACGTTACGGTTGATGGAAGG_8	1.9055	-0.072041
GATCGAGTAGTCTGTGCTACAGTG_8	0.999706088574199	0.158090261086884
TACGCTACAATGCCTCCCATACGT_8	1.05576593796337	0.0302726163120352
AGAACGAGGCCTTGTTCTTCGTTC_8	1.55503	-0.0278592
ATGCACGACTTGCTGTAGGTCACT_8	1.74182273391849	0.101761551793765
CTGTTGACGAGGACTTCGAACTGT_8	1.52193457829169	-0.0122977
CGCAATCTTTACCGAGGTAGCATC_8	2.47315135239436	-0.0115098
TGAAGACGTCGAAGGTACCATGTG_8	1.82253109256324	-0.0861856
GAAGGAAGGTCGGTAATTAGGTCG_8	1.99492521768614	-0.0133766
AGAACGAGACCAGCTTTGTGGTAC_8	0.516793311878209	0.0280188676662692
CAACACCTTACATCGGGATCGTAC_8	1.40345575554794	-0.124806
CAACACCTCGAGACTACTAACTCG_8	2.44511373491049	-0.0956846
CACCTGTTGTCTCCTTCTCAGCTA_8	2.44269901462804	-0.0179215
CGTGTGTAACGTGATGATTCTGGC_8	0.616569948084506	0.0773431318044912
GAACATCGTCTCGCAACAGTCTTC_8	2.15173115012849	-0.0997794
AGTGGATCCTAGGTGATCGTGGAT_8	0.943441349464143	-0.120115
CTGTTGACTCTCTAGGCTGGTTCT_8	1.21524973048831	-0.112257
GAAGGAAGTGCCATTCCTCAGCTA_8	1.0094617434771	-0.0728813
TGCTTCCATGTGAAGCAAGGCTGA_8	0.543570665194657	-0.00867927
CTGATCGTGACTTAGGGTTCATGG_8	0.623861912371711	0.0578370542405412
ACTCCATCAAGGACACGACAAGAG_8	0.975555656304407	-0.084536
CTTAGGACCGTACGAATGCCTCTT_8	1.62582234710394	-0.043667
ATGACGTCGAACGCTTACCTTCTC_8	2.02690916991306	-0.0656902
GAAGGAAGAATGCCTCTCGTGGAT_8	1.98266713166117	-0.0790649
GAGCAGTACTCATTGCCAAGGTCT_8	0.766875691872689	-0.00988203
CACTAGCTCTAGGCATTGCGTAGA_8	2.06231170661224	-0.0242335
CGACGTTAGAGATACGACTGCTAG_8	2.13436607336542	-0.102513
GTTGACCTTGGAGAGTTGCACCAA_8	0.89448101757402	-0.118816
CATACCACAGTCTGTGACATAGGC_8	2.09892137172797	-0.0612522
GTTGTTCGTACGGTTGACAGCAAC_8	1.60973097776402	0.0491266039191167
CATGGCTACACAAGTCAACTGGTG_8	1.18727139819456	0.0113005298351021
GTAGGAGTTTGGTGAGGTGTTCCT_8	1.1530806001858	-0.134543
CCTGATTGGTCGGTAACTACAGTG_8	1.63057506337567	0.0253832718200317
TGCTTCCACATTGCCTTATCAGCG_8	1.06159247915916	0.0425316582761919
TAACCGGTGTATGCTGTAGGATGC_8	1.89679986283294	-0.0277939
CTTCGACTCCAAGTTGCTTCACCA_8	2.13312612170997	-0.0149917
GTCGAAGATAGTTGCGGCTTAGCT_8	1.59110349234867	0.0314250019102999
ATCACACGGCTCTGTATGGTCCTT_8	1.68883961093874	0.11040833282391
TACGCCTTCGATAGAGACGTCGTA_8	1.30561897022423	0.234456454792757
CCTTGATCTTGATCCGCGATGCTT_8	0.620950459166669	0.0866500331608699
TGAGCTAGCTCATTGCCAAGCAGT_8	0.88273290301323	-0.0644365
ACTCTCGAGAGATGTCGATTGGAG_8	1.01958700855346	0.00938927958293939
CATGGCTAAGTCTGTGACTGCTAG_8	1.40457643840888	-0.0285849
CCGTAAGACAACCTAGAACCTTGG_8	0.953226753471244	-0.0944483
CCGTAAGAGACTTAGGGCTTAGCT_8	1.65467221049345	-0.0727621
CCGTAAGATGTGAAGCCAAGCAGT_8	1.30840114409817	-0.137986
GATTACCGCGAGACTATGGTCCTT_8	2.31512686795346	-0.0485437
TGTGACTGCGTCAATGACGGTCTT_8	0.69258821842771	0.0700264942924596
GTTCTCGTGCCATAACAGCAGATG_8	0.603517438053115	0.0469519288938804
TGAAGACGTGGAGAGTTCGTGGAT_8	0.883576735527549	0.0754905159166268
ATCCGGTACACAAGTCACGGTCTT_8	2.5683742871496	-0.0839866
GAACATCGCTTACAGCACATAGGC_8	1.93033939289839	-0.093915
GATGTGTGGCCATAACTACACGCT_8	1.38035005353748	-0.0490046
TCAGGCTTATTCGAGGACTGCTAG_8	1.20177969726716	0.0181812706256182
GTGAAGTGGTCCTAAGCCATACGT_8	2.21173063438759	-0.0633735
GTTGTTCGGCCATAACGCTTAGCT_8	0.73574024084077	-0.0342434
CGCATGATACGTGATGGCATACAG_8	0.864054333020777	-0.135699
GATCGAGTGAGATGTCAAGGCTGA_8	2.16962339962984	-0.0883979
GTAGGAGTTGGAGTTGGATTGGAG_8	2.30096870351231	-0.00668981
CGCTCTATAGGAGGAAACAGCAAC_8	0.382562888705804	0.090221963888081
AGCACTTCAGGCTTCTCGTGTACT_8	2.11836348493251	-0.0221206
CACCTGTTACCAGCTTACTGCTAG_8	1.39379696968858	-0.0529343
ACTGAGGTAGGCTTCTACAGCAAC_8	0.725403117918587	0.191311774971966
TGAGCTAGCATTGCCTACCGCATA_8	0.843099501497432	0.0989633108477972
AGAGTAGCTGGAGTTGCTACAGTG_8	1.42608808672693	-0.121558
TTGGACGTGTCGGTAATCTGCTCT_8	0.859989229342138	0.0893807428757807
CTTCGACTTACCAGGACAGCGATT_8	0.494016217325881	-0.124956
GATAGGCTGACTATGCTCTGAGAG_8	1.33385766666508	0.00749371380845498
GCGTCATTGACTATGCACAGCAAC_8	2.20246764889313	0.0323714094073106
TACGCTACGCTGGATTAGGATGGT_8	0.597428061545753	-0.0622431
AGCGTGTTCGTTATGCAAGAGCCA_8	2.31160525720412	-0.123657
GCTATCCTACCTAAGGTAGGATGC_8	1.4723994453499	-0.0780703
GACGATCTCCAAGTTGCTTCGTTC_8	1.5316182077109	-0.0463723
CGGTTGTTAGCTCCTATCAGACGA_8	0.54222817865931	-0.0156988
GATCGAGTATGGTTGCGATCGTAC_8	1.71408281812504	-0.0761086
GTCGAAGACCGACTATTCGTGGAT_8	1.59686011276381	0.0726618853601963
TGCTTCCAGTCGGTAAAGGTCACT_8	1.14913256153209	-0.116297
ATGACGTCGAACGCTTCGTGTACT_8	0.642292797112468	0.21085618995112
CCTGATTGTTCAGGAGTGCACCAA_8	2.29985417007018	-0.0721369
CGCAATCTCTTGCTGTGCGTTCTA_8	1.05503924720543	0.0328725411665043
ACCACGATTCGAACCACTACAGTG_8	1.84311581873245	-0.0458221
ATGACGTCTGATCGGACTCTGGTT_8	0.352749128230403	-0.0459458
CGGTTGTTTCTCGCAACACCACTA_8	1.49909409052922	-0.00905278
CATGGCTAACCAGCTTCAAGTGCA_8	0.902232031194545	0.0596599139621483
CGTTGCAAGTCGGTAATATCAGCG_8	1.0771204914024	0.0101021677863332
CCTTGTAGGAGATGTCGCTTAGCT_8	2.1913133138785	0.102990222575728
TTCCAAGGCATTCGGTACTGCTAG_8	2.32967947648866	-0.00147216
CGGCTAATGAACGCTTCAAGGTCT_8	0.756823345021068	0.0553345987500817
CTTGTCGAAGCTCCTATTCTCTCG_8	1.05667475859328	-0.158105
CCTTGATCGATGCACTGAGCTCAA_8	2.22277860985902	-0.113897
GAAGGAAGATGGTTGCGCAATTCG_8	1.15041437636885	0.13317716528634
GAGCAGTAGACGAATGCTTCGTTC_8	0.595783402520305	-0.0249363
GCACAACTGCCTTGTTCATGGAAC_8	1.34633621103351	-0.15069
GCTATCCTAAGGACACACGGTCTT_8	1.69286294568686	0.0771411621944696
GCAAGATCCGATAGAGTCTCCGAT_8	1.34530312671221	0.0142152904222451
TCAGGCTTACGTGATGGCAATTCG_8	1.98961498710653	-0.0281764
CGTTGCAACGACCATTCACTGACA_8	1.76745399168149	0.0171064597830362
GTGCCATAGAGATGTCCAAGGTCT_8	2.09692978940198	-0.0837431
CACCTGTTCTCTACTCACAGCAAC_8	1.81633638151498	0.0489953527114444
GAGCAGTAGAGATACGCAGTCTTC_8	2.07081971654861	0.0199804384967208
CATACCACCGTCAATGTGCCTCTT_8	0.639762272755726	-0.028811
TGGTACAGAGGTTCGAGTTCATGG_8	1.34295628533295	-0.0411633
CTTCGACTCATTCGGTAACGGTCA_8	1.76861199791283	-0.088699
ATGACGTCCTCTACTCTGTCCAGA_8	2.2389814266111	-0.0698234
TGGTAGCTACCTAAGGGTAGCATC_8	2.22485597442676	-0.0759242
AACCGTTCGAGATACGTATCAGCG_8	2.29227950497511	0.0135588699349526
ATCACACGTCTCTAGGGCGTTCTA_8	1.40315149170112	-0.0108236
TACGCCTTTGATCGGAACCATGTG_8	2.34558857997445	-0.136295
ACGTTCAGCGATAGAGTGCGTAGA_8	2.07814099846913	-0.0798781
ATCGATCGAGGTTCGACGTGTACT_8	0.957425592868971	0.0572145990927268
AGCGTGTTGAGGACTTGACAAGAG_8	2.47666535431619	-0.0635684
ATCCAGAGCGACCATTAACCTTGG_8	1.4425976027565	-0.0569223
TTGCGAAGTACATCGGTCGTGGAT_8	2.15231820895187	0.000228765560406338
TAACCGGTGTCAGTTGACCGCATA_8	1.50745772436314	-0.169107
AACCGTTCAGGCTTCTTTACGGCT_8	0.790435003973475	0.0728803020560121
CCTTGTAGCGGATTGAGTGTTCCT_8	2.25270692095477	-0.1435
GAGACGATCTAGGTGATGGTCCTT_8	1.84108029951774	-0.12102
TACGCCTTAGTCTGTGTGCCTCTT_8	2.43568239076817	-0.0327312
ACTGAGGTGACTTAGGTGCACCAA_8	1.08474931863568	0.0129274002648527
TGGCATGTTTGATCCGCGAGTATG_8	2.34541866733496	-0.105663
CGACGTTATGATCGGAACCATGTG_8	2.28286582541397	-0.0183247
GAAGTTGGACATTGCGCCATACGT_8	1.44104202670681	-0.0168697
TAACCGGTCTAGGTGATACACGCT_8	1.78463892696647	-0.0345943
GTTCTCGTCATTGCCTCAAGTGCA_8	0.537784935135551	0.0737070985981021
ATCCGGTAGTCTCCTTGATCGTAC_8	1.31604191723171	0.0136521560210429
ATCCGGTACGAGACTATAGGATGC_8	2.06496112824379	-0.0237791
CGCATGATAGGAGGAAGCATACAG_8	1.33914359137907	-0.0709493
TGAGCTAGTACGGTTGATTCTGGC_8	0.921341791489583	0.00175035936589044
GAACATCGAGGCTTCTCACCACTA_8	2.23895135246873	-0.0308863
CCTGATTGCATTGCCTTAGGATGC_8	1.57952249449127	0.102805411609952
AACTGAGCAATGGACGAACCTTGG_8	2.2504907014367	0.0234701228207348
ATCGATCGTGAGGTGTGCTTCTTG_8	1.39850508516051	0.0812002201228806
CGTTGCAATCTAACGCACATAGGC_8	1.09764156957904	-0.0674758
TTGCGAAGAATGGACGTGTGGTAC_8	2.21342054316769	-0.0668331
CGCATGATGCTCTGTAGTCTAGGT_8	1.20491335158519	0.0561201488611483
ATGCACGAGCCATAACAGTCAGGA_8	0.630794933701635	-0.015116
GATCGAGTGACTATGCCTCTGGTT_8	2.12815267902293	0.0263897561889904
CACCTGTTACCAGCTTCAGTCTTC_8	1.73925133062804	-0.0389535
TGAGCTAGTCTCGCAATCGACATC_8	1.87187815332275	0.0470606759552692
CATACCACCAATCGACCATAACGG_8	0.822707203052591	-0.0339354
CACTAGCTCAGTTCTGCAGTCTTC_8	2.00936957303952	0.0156461005235493
GATTGCTCTGGAGAGTCTTCGTTC_8	2.39459626427447	-0.033395
ACTCTCGAACGTGATGAGGCATAG_8	0.82503245579434	0.0283280587952914
GTTGTTCGTACCAGGAGTGTTCCT_8	1.16887784859922	-0.020225
AGCACTTCGTCTCCTTCTCTGGTT_8	1.17810257324791	0.0325227238079616
TTCCAAGGTGCAGGTACTTCACCA_8	0.643193905635846	-0.0247973
CCTTGATCCTGGAGTATTGACAGG_8	1.81774573860995	-0.0798287
GTAGGAGTCGAGACTAAACTGGTG_8	2.50602826855462	-0.0663536
GTGCCATAATCGGTGTTATCAGCG_8	2.18515823193849	-0.0226386
GCTATCCTCACAAGTCTGTGGTAC_8	2.48369326427236	0.0481944865513332
CGCAATCTAGGTTCGAAACTGGTG_8	1.45907724416806	0.0725596753018857
CGTGTGTAAATGGACGCTGGTTCT_8	2.21243077484553	-0.0374483
GATCGAGTCGACCATTGTCTAGGT_8	0.800642129365313	0.00175702253422266
AAGCACTGACGATGACGTCTAGGT_8	2.23694126918884	-0.050786
ATCCGGTATTGATCCGTATCAGCG_8	1.03977748525447	-0.00479567
ATCACACGAGAAGCGTCCATACGT_8	0.87336558402554	-0.0472583
TGTGACTGGCCATAACTCCGAGTT_8	0.92954154295392	-0.0453
GAAGGAAGCCGACTATCTGCGTAT_8	1.52597119809042	0.0273045910536183
TTCCAAGGCGTACGAATCGAGTGA_8	0.440982331340556	-0.0171604
GAGCAGTAAGCTCCTATTACGGCT_8	0.839821402693081	0.116702292138467
ATGACGTCAGTGCAGTTCACGTTC_8	1.23160683713124	-0.0521531
GTTACGCACAGAATCGAGCAGATG_8	2.02886617065265	-0.0202511
TTCCAAGGGAACGCTTTGCGTAGA_8	1.0837888033936	-0.0674553
CCTGATTGCTAGGCATCATGGAAC_8	0.89302606581547	-0.10231
GTTGACCTAATGGACGTTGTCGGT_8	1.94864866356702	-0.0029866
TGGACTCTCTATCGCATGCCTCTT_8	1.00975661978736	-0.0635131
GTGCCATACTAGGTGACCATACGT_8	1.15130447224245	0.0141416645189974
GATAGGCTTCCGTATGCAGGTATC_8	1.30594278502376	0.00460558547187215
ATATGCGCCTAGGCATGCTTCTTG_8	0.594294708214747	0.139865131482922
CGCATGATTTGGTGAGCCTTCCTT_8	0.860240860252554	-0.00478138
CTTAGGACAGTGCAGTTTAGGTCG_8	1.6903277439753	-0.00293446
AACCGTTCGTCCTAAGCATCTACG_8	2.32773458245297	-0.0566758
ACTCCATCTACGGTTGTCGTAGTC_8	1.62804810999821	-0.0783937
TAACCGGTCGTCAATGACTGTGTC_8	1.58038402424297	-0.121621
AGTGGATCGCCTTGTTCATGGAAC_8	2.24194583916257	0.0357499669897321
TGTGACTGAGTCGACAGCATACAG_8	1.13896882182002	0.0278681239260941
TTCCAAGGTGCCATTCAGGATCTG_8	2.50233567727119	-0.00160556
CACCTGTTAGAAGCGTTAGCCGAA_8	1.69854038492274	0.0263663482527718
TTGGACGTCGTCAATGCCATACGT_8	2.37445982198816	-0.0123998
TTGGACGTCTCTACTCTACACGCT_8	0.759639807349185	0.0602833644836467
ACAGCTCAGCTGGATTAACCTCCT_8	0.92969911613821	-0.045063
CCTGATTGCATTGCCTGCTGTTGT_8	0.573616275955855	0.14303329506516
GTGCCATACTGGAGTAGCTTAGCT_8	0.777261861755534	0.00464450340729949
TGAGCTAGCTTGCTGTCTGGTTCT_8	0.993728309789085	0.00233752295550921
TCAGGCTTCTTGCTGTCTTCGTTC_8	1.85821353795049	0.0617209464667896
ATCCGGTACATTGCCTCTACAGTG_8	1.33958884810901	-0.0734844
AGCACTTCCATTCGGTAAGGCTGA_8	1.09135952149795	-0.143789
CCTGATTGGTCAGTTGTGTGGTAC_8	2.51309068061705	-0.0675933
GAAGTTGGTCGAAGGTTTCAGCCT_8	1.77692129357573	0.0203680896248458
CGCATGATCTTACAGCGCTTCTTG_8	2.17375053960276	-0.104462
AACGTCTGTCTAACGCCGAGTATG_8	2.51017581983833	-0.105251
AAGCACTGCATTGCCTGATTGGAG_8	1.52077390573043	0.0629751408197436
TCAGGCTTAGGCTTCTCAGTCTTC_8	1.3612227828923	0.0624564878171433
ACTCTCGACCGACTATCAGGTATC_8	1.30627647203612	-0.0582293
TGTGACTGGTCAGTTGTGCGTAGA_8	1.24506044906864	-0.0651629
GAAGGAAGGTCAGTTGGCTTCTTG_8	1.09030623605029	0.0201291415633711
GAAGGAAGATTCGAGGTCTCCGAT_8	2.43262123672515	-0.117127
CACCTGTTGTCCTAAGCTACAGTG_8	2.32352285915002	-0.0116531
AAGCACTGGCTGGATTAACTGGTG_8	0.866713644921903	-0.0493109
CGGTTGTTTACCAGGATTACGGCT_8	0.556964897792191	-0.135898
GAAGGAAGCGCTAGTAAACCTTGG_8	1.28123578995687	0.0556103182573053
ACTGAGGTTCTCTAGGGACAAGAG_8	2.29847986841356	-0.0781965
CATGGCTATCGAAGGTCTTCACCA_8	1.34750484776966	-0.107974
CTGATCGTTTGGTGAGACCTTCTC_8	0.717293448137127	0.162367385036116
GATTGCTCCATTGCCTAACTGGTG_8	0.73086910760602	-0.0329521
TGGTACAGACCTAAGGAGGATCTG_8	1.42236654785657	0.0141825911209822
CGTTGCAAACTCGTTGCATGGAAC_8	2.04513828986278	-0.0619962
CAACACCTGTCTGATCACCATGTG_8	0.815283403232322	-0.0944402
TTCGTTGGTAGTTGCGGATCGTAC_8	1.09336923956545	-0.0463028
GATAGGCTAAGGACACAACCGAAG_8	0.997415562753629	-0.0435297
AGTTCGTCATCGGTGTCTCTGGTT_8	1.7337395660898	-0.0120635
GTCGAAGACTCTACTCTATCAGCG_8	1.03386495478649	-0.0227214
CGACGTTAACATTGCGTACACGCT_8	1.03812379394087	-0.0712342
CGCATGATCGTTATGCGCGTTCTA_8	1.37115360790884	-0.0255065
ATCCGGTAACTCGTTGTGGTCCTT_8	1.57938341639078	-0.0965446
ACGGAACAGAGATACGCTACAGTG_8	1.38436985536312	0.00566136392370728
CCTTGTAGCTCATTGCGCAATTCG_8	1.59791088293697	0.100424687104704
TGTGACTGTCGAAGGTAACCTCCT_8	2.0565182207643	-0.0652446
TGGCATGTAGGAGGAAGCTTCGAA_8	2.27389110807332	-0.0990372
CGACGTTATGTGCGTTCTGGTTCT_8	0.655081676298219	-0.102998
CAATGTGGTCTCTAGGGCTTCTTG_8	1.90868248385608	-0.125741
CGACGTTACTTACAGCTTGTCGGT_8	1.11955290067032	-0.175565
CTTGTCGACGCTAGTATTCAGCCT_8	1.21304148311616	0.000458346168094176
GTGCCATACCGACTATACTGCTAG_8	1.73315159059198	0.154019697182616
TATCGGTCTAGTTGCGTGCACCAA_8	1.72970128601629	0.0986706573646723
TGGCATGTGAGGACTTACGGTCTT_8	0.916225637012516	0.0897685562554175
GTCATCGATGAGGTGTGACAAGAG_8	2.12068389265757	-0.0934115
ATGACGTCTGAGGTGTACCATGTG_8	1.45462185204734	-0.0507859
GATTACCGCAGTTCTGACCGCATA_8	2.08133713339596	-0.0940216
TGAAGACGACCAATGCCTGGTTCT_8	1.51398818166426	-0.059118
TAACCGGTGAGGACTTTCTGCTCT_8	1.03451034881821	-0.193198
TACGCTACAGTCGACAAACTGGTG_8	1.56930690983461	-0.0948412
TGCTTCCACTCTACTCAACTGGTG_8	1.79198997304745	0.0742090002075838
CTGATCGTTGATCGGACAGTCTTC_8	2.20827001038581	-0.0844603
TCAGGCTTGAGATACGAACCTTGG_8	2.17294066807167	-0.0337879
CTTAGGACAGCTCCTATTGACAGG_8	1.36792444256464	-0.0054041
ATGCCTGTCGATAGAGGACAAGAG_8	1.59225863879527	-0.108441
CGCTCTATAATGGACGTGGTCCTT_8	1.07827759186384	-0.0667873
TGAGCTAGCGTACGAAGCTTAGCT_8	1.3087903850082	-0.0998923
GAGACGATCCTACTGAATGGAAGG_8	1.78566573017497	-0.0890216
TGAGCTAGTACATCGGTGCGTAGA_8	0.695544065369051	0.0600027428937987
GAATCCGAATCGGTGTCTACAGTG_8	1.72869403189907	0.0285015463881808
AGCGTGTTTCTCTAGGAGGATCTG_8	1.12397037426527	-0.000298875
GCGTCATTCAGAATCGCAGCGATT_8	1.60185329934416	0.0108368957961117
GAATCCGAAGGCTTCTGAGCTCAA_8	0.873859835639994	-0.0869843
CTTAGGACCGACCATTCAGCGATT_8	2.05595553284047	0.0580134452798639
GATTGCTCAGTCGACAGCAATTCG_8	0.411463028100452	-0.0292226
TGGTACAGAGGTTCGAGATTGGAG_8	1.01685515566864	-0.0704336
GCTATCCTGTAGAGCAACATAGGC_8	2.01788299480275	0.0770759472870922
ATATGCGCATCGGTGTCCTTCCTT_8	1.35214404773029	0.100540585786679
GCTATCCTCTGACACAGATTGGAG_8	1.95437026878908	-0.0889527
AGAACGAGCGACCATTGCTGTTGT_8	1.17469504982341	-0.075001
AACCGTTCGAATCGTGAAGAGCCA_8	0.387758992813109	0.067855628619989
CGGTTGTTGCTCTGTAGACAAGAG_8	1.21142761272646	-0.0677112
GATGTGTGACGTGATGTTGACAGG_8	2.20255597031318	-0.0128663
TTGCAGACAGTGCAGTGTCTAGGT_8	2.12533921304504	0.0154232816580537
GAACATCGAGGTTCGAACGGTCTT_8	1.01333845544249	-0.0535484
GAAGGAAGGTATGCTGGCTTCTTG_8	1.73898531381042	-0.124976
CTGATCGTCGGATTGAGTATTGGC_8	1.10973019976461	0.0685618559589287
AGCGTGTTGCCTTGTTGAGCTCAA_8	0.651148611920033	0.00746241430408331
GACGATCTCATTGCCTCATGGAAC_8	1.63053034192472	-0.0712537
AAGCACTGTGCAGGTACATCTACG_8	2.26242968461555	-0.00585433
GTCGAAGAAGTCGACAACCATGTG_8	1.21652363225012	0.0202348229032991
CTGATCGTCGTCAATGTCAGACGA_8	1.93228088300045	-0.0808997
GTCATCGATACATCGGCTACAGTG_8	1.54499129028584	-0.00545127
AACTGAGCGCCATAACGCTTCGAA_8	0.899649502470844	0.000940052095795063
AGTTCGTCTCTAACGCCTACAGTG_8	1.23337278876612	-0.00908832
ATGCACGAATCGGTGTTCTGCTCT_8	1.01945848180377	-0.0343876
CATGGCTAGTCCTAAGAGCAGATG_8	1.43396303814826	-0.157518
GATGTGTGCATTGCCTTTCTCTCG_8	1.34652562395892	0.0751422148303297
AGAACGAGGAGGACTTGCTTCTTG_8	1.41182387915098	-0.0482804
CTTCGACTGTCAGTTGATGGAAGG_8	1.84753192546529	-0.0479567
TCGCTGTTCCGACTATAACGGTCA_8	1.2750226088135	0.0247511335537288
AGTTCGTCCTTACAGCTCCGAGTT_8	1.1009131830473	0.0241623478411804
TCGCTGTTTTGGTGAGACAGCAAC_8	1.49893434739426	-0.122699
AACTGAGCGCTGGATTGCGTTCTA_8	2.35844757747516	-0.102919
AGTTCGTCAGGAGGAAAGGATGGT_8	1.11878379815687	0.0544270308929256
CTTAGGACGTAGAGCAAGGATGGT_8	1.82382494744587	-0.115645
TGGTACAGCGATAGAGATTCTGGC_8	1.63940301405684	-0.106531
GACGATCTTAAGTGGCTTAGGTCG_8	2.22310206539454	-0.0530347
TGGACTCTTGGAGAGTTGCCTCTT_8	1.10185240678628	0.0425128824637885
CATACCACTAGTTGCGAGGCATAG_8	1.36236734559211	0.0430444793834174
GAGCAGTAGAATCGTGCTGCGTAT_8	2.12905707436311	0.0114023038918663
ACCACGATGTAGAGCATATCAGCG_8	1.42541554018663	0.0740525840192532
AGAGTAGCGTCGGTAATTGACAGG_8	1.07583660977444	0.0545291461703561
CATACCACGTCGGTAATGGTCCTT_8	0.6501689880298	0.0351500977255362
GCGTCATTTCCGTATGATGGAAGG_8	0.795313173880974	-0.000229499
AGAACGAGAGTCTGTGAGTCAGGA_8	1.50743894049665	0.0014460171324496
AACGTCTGACCAATGCGCTGTTGT_8	2.4394310989176	-0.0553724
ACCACGATTCGAAGGTAAGAGCCA_8	2.23045117577534	-0.00679064
ACTAGGAGTGCCATTCAGTCAGGA_8	1.55623501946318	-0.149616
GTAGGAGTTACCAGGAGCACGTAA_8	2.14406965576696	-0.0422646
AAGCACTGAGTGCAGTCTGGTTCT_8	1.02188340113972	0.0589653839829652
CGGTTGTTCTCTACTCAGGCATAG_8	1.76226073803714	0.0670853940068636
TAACCGGTCTCATTGCGCATACAG_8	0.87149630634646	0.106138011513229
AGAACGAGGAGGACTTCTTCGTTC_8	2.12178220809966	-0.0255344
ATATGCGCCTCAGAGTCTCAGCTA_8	0.561857469444748	-0.0428319
GTTCTCGTACCTAAGGTGCCTCTT_8	1.99108454117597	0.0785998070846169
CCTTGTAGCTCAGAGTTCTGAGAG_8	1.9014224081921	-0.084041
GAACATCGGTATGCTGCTGGTTCT_8	1.47997321556296	-0.0520726
CGGTTGTTCATTCGGTTCGACATC_8	1.8686018991584	-0.0387449
GAAGTTGGTACCAGGACATAACGG_8	2.44772885450729	-0.0374612
CACCTGTTCGTCAATGTGCCTCTT_8	1.61485198073215	-0.0148525
GACGATCTCCTACTGATCGTGGAT_8	0.79146512901811	0.130798697978093
GAATCCGAGTAGAGCAACATAGGC_8	0.87099569275612	-0.082871
GCGTCATTCGTTATGCAACCTCCT_8	0.746480568209709	-0.0341766
TAACCGGTGCTCTGTACTGCGTAT_8	1.90550050501169	-0.0193194
GTCGAAGACGACCATTTTGACAGG_8	0.652672838865506	-0.108726
TCGCTGTTCTTACAGCTCTGCTCT_8	2.43552169303285	-0.10569
AAGCACTGTCCGTATGGCACGTAA_8	1.41964780633661	-0.140279
CAGTCCAAGAGGACTTACTGCTAG_8	2.1289802222174	-0.0513863
CTTAGGACACTCGTTGGCTTAGCT_8	2.08329	-0.0657598
TGTGACTGTAGTTGCGCCATACGT_8	2.07932410410996	-0.0943848
CACCTGTTGAAGAGGTACTGCTAG_8	1.69113533920444	-0.111595
GTCGAAGAACGATGACCATAACGG_8	2.43675960975078	-0.0525224
CTTCGACTAATGGACGTTCTCTCG_8	2.25395793989837	0.0261109371721479
GTTGACCTTGATCGGATCAGACGA_8	2.14840821236853	-0.078914
CAATGTGGGTCCTAAGCATAACGG_8	1.39830698441065	-0.0206175
GAAGGAAGCAGTTCTGTGTCCAGA_8	2.27895498615688	-0.0240823
AGAGTAGCACATTGCGCACTGACA_8	1.42267047221489	0.000154659136313018
GATCGAGTCCAAGTTGACATAGGC_8	1.74327799223591	-0.0343442
CAACACCTCGATAGAGGCTTAGCT_8	2.3093282801991	-0.0519465
AGTGGATCTTACCGAGCATGGAAC_8	0.786017891840141	-0.101072
AGTTCGTCTCGAACCAAAGGCTGA_8	1.38860930449583	0.0649275313778271
CGGCTAATGTCAGTTGAACCTCCT_8	2.32242440069609	-0.00496488
GAACATCGGAATCGTGTGTGGTAC_8	1.57020900770151	-0.0418682
CCTTGTAGGAGATGTCTGCACCAA_8	1.93792664455932	-0.136179
TGGTAGCTTCGAAGGTGTTCATGG_8	1.53125674264354	0.0205717919396305
ACGGAACACAACCTAGAACGGTCA_8	1.98983814335195	-0.0396128
TGGTACAGGAGATGTCCGATGCTT_8	1.01112815949798	-0.0776493
GCTATCCTTGAGGTGTTGCCTCTT_8	1.55327843533903	-0.0611009
CTTGTCGATCTCGCAAGTATTGGC_8	2.11186689628601	-0.0745791
GAACATCGAGTGCAGTCTTCACCA_8	1.8225960059981	-0.0978257
TATCGGTCGAGATGTCGCTTCTTG_8	0.585503226959176	0.016403102262325
CGCAATCTCAACCTAGGAGCTCAA_8	1.44379998730668	0.0610537577176024
TGGACTCTCTTGCTGTCATCTACG_8	2.35604920107229	-0.0492726
GAATCCGAAGTCGACATCAGACGA_8	2.03076773715292	-0.0460801
TATCGGTCCTCAGAGTCGAACTGT_8	2.10322556773734	-0.0201532
ATCGATCGCGTACGAAACTGTGTC_8	1.16792509804663	0.0512629049822104
TGTGACTGCTTGCTGTTGTCCAGA_8	2.05091651194872	-0.0668607
TACGCCTTGCCTTGTTTCGACATC_8	1.02636547376425	-0.0623806
ATCACACGGTCAGTTGGCAATTCG_8	2.1235444210077	0.0215800966520393
TGTGACTGAATGCCTCATTCTGGC_8	2.09514500681662	0.0150327334596322
GTCGAAGATAAGTGGCGATTGGAG_8	1.73932394091965	-0.0902219
CTTGTCGAGTCTCCTTTAGCCGAA_8	2.49097028556466	-0.0860002
GTTCTCGTAATGGACGCAAGGTCT_8	1.47580972703388	-0.0895463
AGCACTTCCGTCAATGTTGACAGG_8	2.19169521592693	-0.0699195
GATTGCTCGAACGCTTCTCAGCTA_8	2.09887594066997	-0.0486096
ATCGCCATCAGAATCGGCTTCGAA_8	1.16194448801752	-0.0444596
ATGCACGATGTGAAGCGCCAGTAT_8	1.77952805154904	-0.00686942
GTTGACCTTGAGGTGTGAGCTCAA_8	1.0642775865392	0.0205512756391276
GTTCTCGTGACGAATGGCATACAG_8	2.31929321037622	-0.0617725
AGTGGATCTCGAACCAACAGCAAC_8	2.31246786489581	-0.018859
ACGTTCAGTCGAAGGTGCTTCTTG_8	1.83796598978102	-0.0785161
CGGCTAATACCTAAGGCATAACGG_8	1.85117912532392	-0.111409
ATGACGTCAGGCTTCTTGTCCAGA_8	0.677989842771497	-0.0211024
AGCGTGTTTTGGTCTCTCACGTTC_8	2.2357819469692	0.0674637938472475
ATCACACGGAATCGTGAGGATCTG_8	1.74445862574358	-0.0893941
TGGCATGTACATTGCGTGGTCCTT_8	0.770590726551459	0.0313652374461306
GAAGGAAGTACGGTTGATTCTGGC_8	2.50742410747003	-0.0651999
AACTGAGCGCTGGATTCAAGGTCT_8	1.73993566348542	-0.100801
ACTGAGGTTGGAGTTGCGATGCTT_8	2.50597736573432	-0.0206838
CAGTCCAATACATCGGTCCGAGTT_8	1.74080260914006	0.0233362428035563
GTGAAGTGGACTATGCCAGCGATT_8	0.748407420625654	-0.171317
CGCATGATCCAAGTTGCTCTGGTT_8	1.39536464819848	-0.0487469
CTTAGGACGACGAATGCCTTCCTT_8	1.89874592037367	-0.0808406
ATCCGGTACGTTATGCTAGGATGC_8	1.50951115212065	-0.0545814
GAAGGAAGGAGATACGCTCTGGTT_8	2.32952337119491	-0.119031
GAGCAGTAGAAGAGGTGCAATTCG_8	0.721860521740419	-0.0128139
ACGACTTGGTAGAGCAGTAGCATC_8	1.98428177864087	-0.104092
GCGTCATTATGGTTGCGCGTTCTA_8	1.25620377503467	-0.0427056
AAGCACTGACATTGCGACTGCTAG_8	0.972266078369471	-0.0707943
GATCGAGTATGGTTGCCATAACGG_8	2.33110285981448	-0.0757004
ACAGCTCATCTCGCAAAACCTTGG_8	1.25408222897113	-0.114828
AGCACTTCCGTCAATGCGTGTACT_8	1.00086677920089	-0.126946
TGGACTCTACCTAAGGGATCGTAC_8	1.70908404296269	0.0590222088888773
GCGTCATTTCCGTATGAGCAGATG_8	1.61861962740005	-0.00419741
GTTCTCGTTGGAGAGTGCCAGTAT_8	0.806217264925228	-0.0991313
TGAGCTAGAGCTCCTATCGACATC_8	1.3023456914041	-0.00365901
ACTGAGGTCCTACTGAACCATGTG_8	1.34811582614317	-0.0542745
CGCTCTATACCAGCTTGCTTAGCT_8	1.73345230177786	-0.080361
TACGCCTTGATGCACTCGAGTATG_8	1.46967782847768	-0.0340597
TGCTTCCAAGGCTTCTTGCGTAGA_8	0.81660177678474	-0.0607798
TGTGACTGGCTCTGTAGTCTAGGT_8	0.65258409207681	0.0789015446761366
AACGTCTGAGTGCAGTATGGAAGG_8	2.4320296453356	-0.116857
GCTATCCTTCGAAGGTCGAACTGT_8	1.33620946719939	-0.0698031
ACTAGGAGCAGTTCTGTTCAGCCT_8	2.21119962396428	-0.0228136
TACGCCTTACGTGATGACTGCTAG_8	0.834692199183596	-0.0681642
ATGCACGAGATGCACTGTCTAGGT_8	0.631795317660385	-0.0266577
CAACACCTCAATCGACACCTTCTC_8	0.518931686983554	-0.00269059
CGCTCTATTCCGTATGTCTGCTCT_8	0.62878355683971	-0.120928
GAACATCGCGTACGAACATAACGG_8	1.82085515567632	-0.0239025
ATGACGTCAGGCTTCTACCGCATA_8	0.79351232095638	-0.00402429
GCAAGATCCCTACTGACATAACGG_8	0.850745197016113	-0.172041
GCAAGATCGCTGGATTTTAGGTCG_8	2.2429690559396	0.00552759290837659
ATCCGGTAGTCGGTAAAACGGTCA_8	0.640739250582945	-0.0576928
CAGTCCAATCTCTAGGCAGGTATC_8	1.17306086384084	-0.107075
GAAGGAAGGAAGAGGTTAGCCGAA_8	0.894560270938205	-0.0166757
ATCGATCGCTTACAGCGCCAGTAT_8	0.98734882985843	-0.186405
ACAGCTCATCCGTATGAAGGCTGA_8	1.08595888889292	-0.10202
CGACGTTATCTAACGCCATAACGG_8	1.51934356209341	0.0519626199834433
CTTCGACTCTCTACTCTGCCTCTT_8	0.713010346029476	-0.093945
GTAGGAGTCTCTACTCTTCAGCCT_8	1.0924517161811	-0.0787902
CAGTCCAACGCTAGTAACCATGTG_8	2.21557	-0.00663613
[truncated: 1,385 more rows]
