# Supplementary material for: A silkworm model reveals coordinated cellular communities and conserved Hippo regulation in silk production
Source: Research Square preprint supplement (doi:10.21203/rs.3.rs-7747598/v1), 2025-10-01
Supplement: Supplementary file 13 [file Supplementary Data 11.xlsx]

## Sheet: main
Supplementary Data 11. Regulatory network of spatial transcriptome clusters stP_C1 and stP_C2.
1	stP_C1
2	stP_C2

## Sheet: stP_C1
regulatoryGene	targetGene	weight
KWMTBOMO00051	KWMTBOMO01001	0.00152564724092416
KWMTBOMO00051	KWMTBOMO15365	0.00115739117677096
KWMTBOMO00051	KWMTBOMO08464	0.000927475814093119
KWMTBOMO00203	KWMTBOMO08464	0
KWMTBOMO00203	KWMTBOMO01001	0
KWMTBOMO00203	KWMTBOMO15365	0
KWMTBOMO00314	KWMTBOMO08464	0.000700144913765777
KWMTBOMO00314	KWMTBOMO15365	8.68701159055065e-05
KWMTBOMO00314	KWMTBOMO01001	0.000309104603600603
KWMTBOMO00339	KWMTBOMO01001	0.0406918684732124
KWMTBOMO00339	KWMTBOMO08464	0.0479700248563197
KWMTBOMO00339	KWMTBOMO15365	0.0883927237304486
KWMTBOMO00352	KWMTBOMO01001	0
KWMTBOMO00352	KWMTBOMO15365	0
KWMTBOMO00352	KWMTBOMO08464	0
KWMTBOMO00651	KWMTBOMO15365	0
KWMTBOMO00651	KWMTBOMO01001	0
KWMTBOMO00651	KWMTBOMO08464	0
KWMTBOMO00660	KWMTBOMO08464	0.000181905242539658
KWMTBOMO00660	KWMTBOMO15365	0.000347503146403253
KWMTBOMO00660	KWMTBOMO01001	0.00268656893121096
KWMTBOMO01036	KWMTBOMO08464	0.00920016814706654
KWMTBOMO01036	KWMTBOMO01001	0.0120358171174994
KWMTBOMO01036	KWMTBOMO15365	0.00855326999848135
KWMTBOMO01078	KWMTBOMO08464	0.00891511949313678
KWMTBOMO01078	KWMTBOMO01001	0.00847306616711421
KWMTBOMO01078	KWMTBOMO15365	0.00910676321482763
KWMTBOMO01119	KWMTBOMO15365	0.00446740877560295
KWMTBOMO01119	KWMTBOMO08464	0.00137595334561149
KWMTBOMO01119	KWMTBOMO01001	0.00291679957052423
KWMTBOMO01121	KWMTBOMO15365	0.000957437282155443
KWMTBOMO01121	KWMTBOMO08464	0.00217123081922989
KWMTBOMO01121	KWMTBOMO01001	0.00188936177307719
KWMTBOMO01186	KWMTBOMO08464	0.00462559127726546
KWMTBOMO01186	KWMTBOMO15365	0.00230016007391975
KWMTBOMO01186	KWMTBOMO01001	0.00449193674424104
KWMTBOMO01366	KWMTBOMO08464	0.00216145907636229
KWMTBOMO01366	KWMTBOMO01001	0.00665593544304743
KWMTBOMO01366	KWMTBOMO15365	0.00250001597554385
KWMTBOMO01408	KWMTBOMO01001	0.00663647677678737
KWMTBOMO01408	KWMTBOMO08464	0.0055183977344884
KWMTBOMO01408	KWMTBOMO15365	0.00657309231954533
KWMTBOMO01412	KWMTBOMO08464	0.00120948509416154
KWMTBOMO01412	KWMTBOMO01001	0.000225678522333421
KWMTBOMO01412	KWMTBOMO15365	0.00281572837647153
KWMTBOMO01425	KWMTBOMO08464	0.00229159303629923
KWMTBOMO01425	KWMTBOMO01001	0.000774646675392365
KWMTBOMO01425	KWMTBOMO15365	0.0062700335051388
KWMTBOMO01444	KWMTBOMO15365	0.00631160430010226
KWMTBOMO01444	KWMTBOMO08464	0.0106171650237552
KWMTBOMO01444	KWMTBOMO01001	0.0060413803857285
KWMTBOMO01705	KWMTBOMO15365	0.00112703589495624
KWMTBOMO01705	KWMTBOMO01001	0.00250592472243376
KWMTBOMO01705	KWMTBOMO08464	0.0041978398933505
KWMTBOMO01794	KWMTBOMO01001	0.00200308647923109
KWMTBOMO01794	KWMTBOMO08464	0.00163597533146093
KWMTBOMO01794	KWMTBOMO15365	0.00344084194611223
KWMTBOMO01827	KWMTBOMO08464	0.000742242460907553
KWMTBOMO01827	KWMTBOMO15365	0.00110846735398218
KWMTBOMO01827	KWMTBOMO01001	0.000401456154199156
KWMTBOMO01879	KWMTBOMO15365	0.011144469028482
KWMTBOMO01879	KWMTBOMO08464	0.00705548031766628
KWMTBOMO01879	KWMTBOMO01001	0.00542458678216333
KWMTBOMO01948	KWMTBOMO15365	0.00286150738756291
KWMTBOMO01948	KWMTBOMO08464	0.00115308744383925
KWMTBOMO01948	KWMTBOMO01001	0.00156317675520988
KWMTBOMO01956	KWMTBOMO08464	0.000650137430878865
KWMTBOMO01956	KWMTBOMO15365	0.000344326065942528
KWMTBOMO01956	KWMTBOMO01001	0.000716272460197768
KWMTBOMO02016	KWMTBOMO08464	1.47430818127832e-05
KWMTBOMO02016	KWMTBOMO15365	0.00114608437827015
KWMTBOMO02016	KWMTBOMO01001	5.48600378423673e-05
KWMTBOMO02050	KWMTBOMO08464	0.00185981961405202
KWMTBOMO02050	KWMTBOMO01001	0.000474941827827981
KWMTBOMO02050	KWMTBOMO15365	0.000559022147513065
KWMTBOMO02188	KWMTBOMO01001	0.00388354823028405
KWMTBOMO02188	KWMTBOMO08464	0.00348658006112541
KWMTBOMO02188	KWMTBOMO15365	0.0053479235340639
KWMTBOMO02244	KWMTBOMO01001	7.80723797904988e-05
KWMTBOMO02244	KWMTBOMO08464	6.59064394680698e-05
KWMTBOMO02244	KWMTBOMO15365	0.000200527022209863
KWMTBOMO02272	KWMTBOMO01001	0.00200812667261583
KWMTBOMO02272	KWMTBOMO15365	0.00198921791921346
KWMTBOMO02272	KWMTBOMO08464	0.00244116931759043
KWMTBOMO02277	KWMTBOMO15365	0.00138383752728793
KWMTBOMO02277	KWMTBOMO08464	0.00301191980455314
KWMTBOMO02277	KWMTBOMO01001	0.00295304965605838
KWMTBOMO02424	KWMTBOMO15365	0.0071773908483084
KWMTBOMO02424	KWMTBOMO01001	0.00599533004010183
KWMTBOMO02424	KWMTBOMO08464	0.0155160762277809
KWMTBOMO02473	KWMTBOMO15365	0.000527752721225798
KWMTBOMO02473	KWMTBOMO08464	0.00239601490348036
KWMTBOMO02473	KWMTBOMO01001	0.000467274600522901
KWMTBOMO02474	KWMTBOMO15365	0.00180642782273731
KWMTBOMO02474	KWMTBOMO08464	0.000299095296553892
KWMTBOMO02474	KWMTBOMO01001	0.000150666940322504
KWMTBOMO02579	KWMTBOMO08464	0.0087976502173029
KWMTBOMO02579	KWMTBOMO01001	0.00885011644818189
KWMTBOMO02579	KWMTBOMO15365	0.007201986720788
KWMTBOMO02719	KWMTBOMO08464	0.00847376394259067
KWMTBOMO02719	KWMTBOMO15365	0.00951946836291585
KWMTBOMO02719	KWMTBOMO01001	0.0054728153942113
KWMTBOMO02734	KWMTBOMO08464	0.0359699761164853
KWMTBOMO02734	KWMTBOMO01001	0.0379632412334566
KWMTBOMO02734	KWMTBOMO15365	0.0516611570980924
KWMTBOMO02738	KWMTBOMO01001	0.00403494293726031
KWMTBOMO02738	KWMTBOMO15365	0.00183413651786326
KWMTBOMO02738	KWMTBOMO08464	0.00323992043835024
KWMTBOMO02748	KWMTBOMO01001	0.00357855335802374
KWMTBOMO02748	KWMTBOMO15365	0.00257093754782532
KWMTBOMO02748	KWMTBOMO08464	0.00254557878121168
KWMTBOMO02790	KWMTBOMO15365	0.00213931165122576
KWMTBOMO02790	KWMTBOMO08464	0.001096380445738
KWMTBOMO02790	KWMTBOMO01001	0.00177890246762878
KWMTBOMO02820	KWMTBOMO01001	0.000611117786885946
KWMTBOMO02820	KWMTBOMO15365	0.000149441851153586
KWMTBOMO02820	KWMTBOMO08464	0.000182095303172107
KWMTBOMO02834	KWMTBOMO08464	0.000381911421220144
KWMTBOMO02834	KWMTBOMO15365	0.00226797297219448
KWMTBOMO02834	KWMTBOMO01001	0.000659592814629504
KWMTBOMO02926	KWMTBOMO15365	0
KWMTBOMO02926	KWMTBOMO08464	0
KWMTBOMO02926	KWMTBOMO01001	0
KWMTBOMO03240	KWMTBOMO08464	0.00665801572058543
KWMTBOMO03240	KWMTBOMO15365	0.00155537495505808
KWMTBOMO03240	KWMTBOMO01001	0.00497199172946571
KWMTBOMO03283	KWMTBOMO01001	0.000695954377960989
KWMTBOMO03283	KWMTBOMO15365	0.000209367594347817
KWMTBOMO03283	KWMTBOMO08464	0.00311220544954934
KWMTBOMO03284	KWMTBOMO08464	0.000236565288970752
KWMTBOMO03284	KWMTBOMO15365	0.000537402355121931
KWMTBOMO03284	KWMTBOMO01001	0.0031598654417588
KWMTBOMO03288	KWMTBOMO08464	0.00232085755943045
KWMTBOMO03288	KWMTBOMO01001	0.00107395559353447
KWMTBOMO03288	KWMTBOMO15365	0.000510483496723184
KWMTBOMO03297	KWMTBOMO08464	0.0078394815745777
KWMTBOMO03297	KWMTBOMO15365	0.00504041366381343
KWMTBOMO03297	KWMTBOMO01001	0.00664536132585604
KWMTBOMO03312	KWMTBOMO08464	0.00996805804215877
KWMTBOMO03312	KWMTBOMO15365	0.00879754586281381
KWMTBOMO03312	KWMTBOMO01001	0.00874006300870478
KWMTBOMO03338	KWMTBOMO15365	0.000702859086134053
KWMTBOMO03338	KWMTBOMO01001	0.000107289114652148
KWMTBOMO03338	KWMTBOMO08464	0.00240485954452635
KWMTBOMO03418	KWMTBOMO15365	0.00272684868998022
KWMTBOMO03418	KWMTBOMO08464	0.00629455765340239
KWMTBOMO03418	KWMTBOMO01001	0.00159268509031469
KWMTBOMO03477	KWMTBOMO01001	0.00186787586646595
KWMTBOMO03477	KWMTBOMO08464	0.00114758796738497
KWMTBOMO03477	KWMTBOMO15365	0.000375894718210211
KWMTBOMO03679	KWMTBOMO15365	0.000736435375282632
KWMTBOMO03679	KWMTBOMO08464	0.000317448779829629
KWMTBOMO03679	KWMTBOMO01001	0.000575602479301684
KWMTBOMO03777	KWMTBOMO15365	0.00161542918597551
KWMTBOMO03777	KWMTBOMO08464	0.00552031823083672
KWMTBOMO03777	KWMTBOMO01001	0.00362677853246607
KWMTBOMO03869	KWMTBOMO01001	0.00452556653836236
KWMTBOMO03869	KWMTBOMO15365	0.00318574399976125
KWMTBOMO03869	KWMTBOMO08464	0.00321860546632509
KWMTBOMO04027	KWMTBOMO15365	0.0202187915576665
KWMTBOMO04027	KWMTBOMO08464	0.0121642866514303
KWMTBOMO04027	KWMTBOMO01001	0.0147755112288259
KWMTBOMO04106	KWMTBOMO08464	0.0141233839739301
KWMTBOMO04106	KWMTBOMO01001	0.0161340657301047
KWMTBOMO04106	KWMTBOMO15365	0.0100784935903498
KWMTBOMO04133	KWMTBOMO08464	2.90848428134982e-05
KWMTBOMO04133	KWMTBOMO01001	0.000357590075517105
KWMTBOMO04133	KWMTBOMO15365	6.6468959250229e-05
KWMTBOMO04407	KWMTBOMO01001	0.00235108366057682
KWMTBOMO04407	KWMTBOMO15365	0.00368768067596394
KWMTBOMO04407	KWMTBOMO08464	0.00376210451136868
KWMTBOMO04483	KWMTBOMO01001	0.00253363969339871
KWMTBOMO04483	KWMTBOMO15365	0.00113312862394768
KWMTBOMO04483	KWMTBOMO08464	0.00792799947975721
KWMTBOMO04507	KWMTBOMO01001	0
KWMTBOMO04507	KWMTBOMO08464	0
KWMTBOMO04507	KWMTBOMO15365	0
KWMTBOMO04591	KWMTBOMO01001	0.00863621020626715
KWMTBOMO04591	KWMTBOMO08464	0.00481075831742613
KWMTBOMO04591	KWMTBOMO15365	0.00658976538240878
KWMTBOMO04634	KWMTBOMO08464	0.00274171466940916
KWMTBOMO04634	KWMTBOMO01001	0.00164407842720557
KWMTBOMO04634	KWMTBOMO15365	0.00150725889994873
KWMTBOMO04637	KWMTBOMO08464	0.0010788593179031
KWMTBOMO04637	KWMTBOMO15365	0.000309144629185649
KWMTBOMO04637	KWMTBOMO01001	0.000852585698952317
KWMTBOMO04674	KWMTBOMO15365	0.00336242878967883
KWMTBOMO04674	KWMTBOMO01001	0.00345784371505509
KWMTBOMO04674	KWMTBOMO08464	0.00351331956988958
KWMTBOMO04675	KWMTBOMO01001	0
KWMTBOMO04675	KWMTBOMO15365	0
KWMTBOMO04675	KWMTBOMO08464	0
KWMTBOMO04908	KWMTBOMO01001	0.00176987921867465
KWMTBOMO04908	KWMTBOMO15365	0.000618165406972461
KWMTBOMO04908	KWMTBOMO08464	0.00100117926427124
KWMTBOMO04910	KWMTBOMO01001	0.00095779165398965
KWMTBOMO04910	KWMTBOMO08464	0.00349403862975436
KWMTBOMO04910	KWMTBOMO15365	0.000595844554413813
KWMTBOMO04995	KWMTBOMO08464	0.00237974082694264
KWMTBOMO04995	KWMTBOMO01001	0.00140121509241048
KWMTBOMO04995	KWMTBOMO15365	0.000154838666662643
KWMTBOMO05040	KWMTBOMO01001	0.000172914818209744
KWMTBOMO05040	KWMTBOMO08464	0.000170500138343141
KWMTBOMO05040	KWMTBOMO15365	0.00110475825282973
KWMTBOMO05058	KWMTBOMO08464	0.000764088018053158
KWMTBOMO05058	KWMTBOMO01001	0.000336392318897521
KWMTBOMO05058	KWMTBOMO15365	0.000352084781345371
KWMTBOMO05076	KWMTBOMO15365	0.000288625701917072
KWMTBOMO05076	KWMTBOMO08464	0.00111010072513493
KWMTBOMO05076	KWMTBOMO01001	0.000381290697429148
KWMTBOMO05086	KWMTBOMO08464	9.24617885841464e-05
KWMTBOMO05086	KWMTBOMO15365	0.000153134617583733
KWMTBOMO05086	KWMTBOMO01001	1.40208119504453e-05
KWMTBOMO05232	KWMTBOMO15365	6.36599167562355e-05
KWMTBOMO05232	KWMTBOMO01001	0.000392583464918851
KWMTBOMO05232	KWMTBOMO08464	0.00112260250687089
KWMTBOMO05445	KWMTBOMO15365	0.00911638633738394
KWMTBOMO05445	KWMTBOMO01001	0.0116884050230885
KWMTBOMO05445	KWMTBOMO08464	0.0167725597313288
KWMTBOMO05461	KWMTBOMO08464	0.000851554832561508
KWMTBOMO05461	KWMTBOMO01001	0.000779911677213184
KWMTBOMO05461	KWMTBOMO15365	0.00388986200207624
KWMTBOMO05671	KWMTBOMO08464	0.00237857076337353
KWMTBOMO05671	KWMTBOMO01001	0.00126974290041214
KWMTBOMO05671	KWMTBOMO15365	0.00176923748398026
KWMTBOMO05681	KWMTBOMO15365	4.27207548726656e-05
KWMTBOMO05681	KWMTBOMO01001	0.00121090663038396
KWMTBOMO05681	KWMTBOMO08464	0.00110425565831653
KWMTBOMO05718	KWMTBOMO08464	0.00389127918497545
KWMTBOMO05718	KWMTBOMO15365	0.00202357243212322
KWMTBOMO05718	KWMTBOMO01001	0.000631106509873224
KWMTBOMO05767	KWMTBOMO01001	0.00168394482168049
KWMTBOMO05767	KWMTBOMO08464	0.0021120446653541
KWMTBOMO05767	KWMTBOMO15365	0.0013391968727605
KWMTBOMO05841	KWMTBOMO15365	0
KWMTBOMO05841	KWMTBOMO08464	0
KWMTBOMO05841	KWMTBOMO01001	0
KWMTBOMO05846	KWMTBOMO01001	0.0101895131637
KWMTBOMO05846	KWMTBOMO15365	0.00774065584463995
KWMTBOMO05846	KWMTBOMO08464	0.00694678292261088
KWMTBOMO05847	KWMTBOMO08464	0.00265151758595008
KWMTBOMO05847	KWMTBOMO15365	0.00257788025894794
KWMTBOMO05847	KWMTBOMO01001	0.00303556491089091
KWMTBOMO05890	KWMTBOMO01001	0.0099378611351491
KWMTBOMO05890	KWMTBOMO08464	0.013332308366198
KWMTBOMO05890	KWMTBOMO15365	0.0105080088832395
KWMTBOMO05926	KWMTBOMO01001	0.0119841094159883
KWMTBOMO05926	KWMTBOMO15365	0.011386213493778
KWMTBOMO05926	KWMTBOMO08464	0.0136893466886255
KWMTBOMO06071	KWMTBOMO08464	0.00313763336714366
KWMTBOMO06071	KWMTBOMO01001	0.0041936907845093
KWMTBOMO06071	KWMTBOMO15365	0.00310871649782344
KWMTBOMO06080	KWMTBOMO08464	0.00556068974541157
KWMTBOMO06080	KWMTBOMO15365	0.00939688536631523
KWMTBOMO06080	KWMTBOMO01001	0.00873360010934267
KWMTBOMO06085	KWMTBOMO15365	0.0025754418513991
KWMTBOMO06085	KWMTBOMO08464	0.00154160595349053
KWMTBOMO06085	KWMTBOMO01001	0.00424556766906241
KWMTBOMO06089	KWMTBOMO08464	0.00342059944188145
KWMTBOMO06089	KWMTBOMO01001	0.00605017780911938
KWMTBOMO06089	KWMTBOMO15365	0.00453367348518448
KWMTBOMO06092	KWMTBOMO15365	0.00552075620869961
KWMTBOMO06092	KWMTBOMO08464	0.0048590982582038
KWMTBOMO06092	KWMTBOMO01001	0.00825328345273437
KWMTBOMO06120	KWMTBOMO15365	0.00410476668398359
KWMTBOMO06120	KWMTBOMO08464	0.0020577033733942
KWMTBOMO06120	KWMTBOMO01001	0.00475843013658861
KWMTBOMO06128	KWMTBOMO15365	0.00331194829118137
KWMTBOMO06128	KWMTBOMO08464	0.00564383518346277
KWMTBOMO06128	KWMTBOMO01001	0.0077686130910664
KWMTBOMO06130	KWMTBOMO01001	0.00533209685494273
KWMTBOMO06130	KWMTBOMO08464	0.00734253780275871
KWMTBOMO06130	KWMTBOMO15365	0.00360180707815648
KWMTBOMO06134	KWMTBOMO08464	0.00462066887285326
KWMTBOMO06134	KWMTBOMO15365	0.00421880339369486
KWMTBOMO06134	KWMTBOMO01001	0.00429226320815457
KWMTBOMO06186	KWMTBOMO01001	0.00249368617381775
KWMTBOMO06186	KWMTBOMO15365	0.000470037558701867
KWMTBOMO06186	KWMTBOMO08464	3.65788483042003e-05
KWMTBOMO06191	KWMTBOMO15365	0.00958484117245933
KWMTBOMO06191	KWMTBOMO08464	0.00756225247920665
KWMTBOMO06191	KWMTBOMO01001	0.00738513025683923
KWMTBOMO06192	KWMTBOMO15365	0.002356230114793
KWMTBOMO06192	KWMTBOMO01001	0.00192349562262335
KWMTBOMO06192	KWMTBOMO08464	0.00345348899479322
KWMTBOMO06195	KWMTBOMO15365	0.00139099972862577
KWMTBOMO06195	KWMTBOMO08464	0.00300852513926535
KWMTBOMO06195	KWMTBOMO01001	0.00144882136742196
KWMTBOMO06196	KWMTBOMO08464	0.00133182582038812
KWMTBOMO06196	KWMTBOMO01001	0.000363964697065786
KWMTBOMO06196	KWMTBOMO15365	0.0015356329544839
KWMTBOMO06201	KWMTBOMO01001	0.0003186425818046
KWMTBOMO06201	KWMTBOMO15365	0.000121638327915695
KWMTBOMO06201	KWMTBOMO08464	0.000293947331600438
KWMTBOMO06202	KWMTBOMO08464	0.00755554901454692
KWMTBOMO06202	KWMTBOMO15365	0.00281778711538482
KWMTBOMO06202	KWMTBOMO01001	0.00227382925923266
KWMTBOMO06205	KWMTBOMO01001	0.00517235439466396
KWMTBOMO06205	KWMTBOMO15365	0.00589758882157206
KWMTBOMO06205	KWMTBOMO08464	0.00291821258518858
KWMTBOMO06247	KWMTBOMO15365	0.000704313031258086
KWMTBOMO06247	KWMTBOMO01001	8.6380701391467e-05
KWMTBOMO06247	KWMTBOMO08464	0.000243874424088712
KWMTBOMO06250	KWMTBOMO08464	0.00383226386636619
KWMTBOMO06250	KWMTBOMO15365	0.00161666174520951
KWMTBOMO06250	KWMTBOMO01001	0.00164795430720827
KWMTBOMO06264	KWMTBOMO08464	0.000285999140732708
KWMTBOMO06264	KWMTBOMO15365	9.30994647433598e-05
KWMTBOMO06264	KWMTBOMO01001	0.000336350924256133
KWMTBOMO06269	KWMTBOMO08464	0.000901362140293955
KWMTBOMO06269	KWMTBOMO15365	0.00104239545098507
KWMTBOMO06269	KWMTBOMO01001	0.000807014476865316
KWMTBOMO06276	KWMTBOMO01001	0.000424912423773077
KWMTBOMO06276	KWMTBOMO15365	0.000586251968976381
KWMTBOMO06276	KWMTBOMO08464	0.000329671325715219
KWMTBOMO06340	KWMTBOMO01001	0.00126328977444009
KWMTBOMO06340	KWMTBOMO15365	0.00280835875380421
KWMTBOMO06340	KWMTBOMO08464	0.00702659799649638
KWMTBOMO06342	KWMTBOMO15365	0.00328720701227844
KWMTBOMO06342	KWMTBOMO01001	0.00355338743043222
KWMTBOMO06342	KWMTBOMO08464	0.00262222576600592
KWMTBOMO06372	KWMTBOMO01001	0.00531659118194546
KWMTBOMO06372	KWMTBOMO08464	0.00369328213334138
KWMTBOMO06372	KWMTBOMO15365	0.00487159723796091
KWMTBOMO06713	KWMTBOMO15365	0.00586332321801274
KWMTBOMO06713	KWMTBOMO08464	0.0040389504480168
KWMTBOMO06713	KWMTBOMO01001	0.00651892474676266
KWMTBOMO06821	KWMTBOMO15365	1.84014836180679e-05
KWMTBOMO06821	KWMTBOMO01001	0.000155734345288967
KWMTBOMO06821	KWMTBOMO08464	0.00028236494472256
KWMTBOMO06883	KWMTBOMO01001	0
KWMTBOMO06883	KWMTBOMO08464	0
KWMTBOMO06883	KWMTBOMO15365	0
KWMTBOMO06920	KWMTBOMO01001	0.00453361501079786
KWMTBOMO06920	KWMTBOMO08464	0.00189089953851534
KWMTBOMO06920	KWMTBOMO15365	0.00308997747524007
KWMTBOMO06924	KWMTBOMO08464	0.00110510470630984
KWMTBOMO06924	KWMTBOMO15365	0.00164172292082883
KWMTBOMO06924	KWMTBOMO01001	0.00247547769812009
KWMTBOMO06968	KWMTBOMO08464	0.000716282756887538
KWMTBOMO06968	KWMTBOMO15365	0.00111547257266785
KWMTBOMO06968	KWMTBOMO01001	0.00072921637243796
KWMTBOMO06982	KWMTBOMO15365	0
KWMTBOMO06982	KWMTBOMO08464	0
KWMTBOMO06982	KWMTBOMO01001	0
KWMTBOMO07048	KWMTBOMO15365	0.000506018887432089
KWMTBOMO07048	KWMTBOMO08464	0.000262734231155461
KWMTBOMO07048	KWMTBOMO01001	0.000229370213514038
KWMTBOMO07058	KWMTBOMO15365	0.00900105109606363
KWMTBOMO07058	KWMTBOMO08464	0.00919056494191454
KWMTBOMO07058	KWMTBOMO01001	0.01500786036832
KWMTBOMO07077	KWMTBOMO08464	0.000709168869315861
KWMTBOMO07077	KWMTBOMO15365	0.00221231290075312
KWMTBOMO07077	KWMTBOMO01001	0.000126839786359703
KWMTBOMO07252	KWMTBOMO08464	0.00310501245037899
KWMTBOMO07252	KWMTBOMO15365	0.00253787940317913
KWMTBOMO07252	KWMTBOMO01001	0.00159239456403819
KWMTBOMO07389	KWMTBOMO01001	0.0160495852980621
KWMTBOMO07389	KWMTBOMO08464	0.0203703218895702
KWMTBOMO07389	KWMTBOMO15365	0.0123119703014264
KWMTBOMO07397	KWMTBOMO01001	0.00282704481580495
KWMTBOMO07397	KWMTBOMO15365	0.00399739707483715
KWMTBOMO07397	KWMTBOMO08464	0.00272706207156296
KWMTBOMO07403	KWMTBOMO08464	0.000502839996271249
KWMTBOMO07403	KWMTBOMO15365	0.00200840935989635
KWMTBOMO07403	KWMTBOMO01001	0.00666327663224575
KWMTBOMO07505	KWMTBOMO15365	0.000517938527219193
KWMTBOMO07505	KWMTBOMO01001	0.000838924388151288
KWMTBOMO07505	KWMTBOMO08464	0.000281247924051515
KWMTBOMO07506	KWMTBOMO15365	0.00189216067516916
KWMTBOMO07506	KWMTBOMO08464	0.00526564815526668
KWMTBOMO07506	KWMTBOMO01001	0.00104007405016016
KWMTBOMO07507	KWMTBOMO01001	0.0036582799337035
KWMTBOMO07507	KWMTBOMO08464	0.00337965914822147
KWMTBOMO07507	KWMTBOMO15365	0.00406893376039704
KWMTBOMO07709	KWMTBOMO01001	0.000606119537644058
KWMTBOMO07709	KWMTBOMO08464	0.00219940050638016
KWMTBOMO07709	KWMTBOMO15365	0.00603669998292762
KWMTBOMO07798	KWMTBOMO08464	0.0112676011581684
KWMTBOMO07798	KWMTBOMO01001	0.0107318372245496
KWMTBOMO07798	KWMTBOMO15365	0.0123778401100264
KWMTBOMO07825	KWMTBOMO08464	0.000105311309782834
KWMTBOMO07825	KWMTBOMO15365	0.000108244745686911
KWMTBOMO07825	KWMTBOMO01001	0.00616744388553238
KWMTBOMO07931	KWMTBOMO01001	0.00436525879056778
KWMTBOMO07931	KWMTBOMO08464	0.00405409083135096
KWMTBOMO07931	KWMTBOMO15365	0.000238480478174984
KWMTBOMO08005	KWMTBOMO15365	0.00403210272987583
KWMTBOMO08005	KWMTBOMO08464	0.00318087619612694
KWMTBOMO08005	KWMTBOMO01001	0.00305575560128019
KWMTBOMO08022	KWMTBOMO15365	1.13663175133084e-05
KWMTBOMO08022	KWMTBOMO08464	0.00048369967180206
KWMTBOMO08022	KWMTBOMO01001	1.04474293625289e-05
KWMTBOMO08179	KWMTBOMO08464	0.000927805040234415
KWMTBOMO08179	KWMTBOMO15365	0.000140653304654678
KWMTBOMO08179	KWMTBOMO01001	0.000330831407870736
KWMTBOMO08361	KWMTBOMO01001	0
KWMTBOMO08361	KWMTBOMO15365	0
KWMTBOMO08361	KWMTBOMO08464	0
KWMTBOMO08403	KWMTBOMO15365	0.00021156947350167
KWMTBOMO08403	KWMTBOMO08464	0.000120420042746639
KWMTBOMO08403	KWMTBOMO01001	0.00207283342506126
KWMTBOMO08511	KWMTBOMO15365	0.00225451505355092
KWMTBOMO08511	KWMTBOMO08464	0.00525778816914237
KWMTBOMO08511	KWMTBOMO01001	0.00236415478626416
KWMTBOMO08603	KWMTBOMO15365	0.0019794595603792
KWMTBOMO08603	KWMTBOMO01001	0.00137679329265905
KWMTBOMO08603	KWMTBOMO08464	0.00177260047331267
KWMTBOMO08612	KWMTBOMO08464	0.0104987564464378
KWMTBOMO08612	KWMTBOMO01001	0.0073762733778964
KWMTBOMO08612	KWMTBOMO15365	0.00721976210921836
KWMTBOMO08651	KWMTBOMO15365	0.00225210837294213
KWMTBOMO08651	KWMTBOMO01001	0.000158224097348538
KWMTBOMO08651	KWMTBOMO08464	0.00337194830443514
KWMTBOMO08662	KWMTBOMO15365	0.00634259777224871
KWMTBOMO08662	KWMTBOMO08464	0.0130023638091885
KWMTBOMO08662	KWMTBOMO01001	0.0094319599683492
KWMTBOMO08664	KWMTBOMO15365	0.00106004393697393
KWMTBOMO08664	KWMTBOMO08464	0.000520838573571493
KWMTBOMO08664	KWMTBOMO01001	0.000221334274737624
KWMTBOMO08696	KWMTBOMO08464	8.91392664631084e-05
KWMTBOMO08696	KWMTBOMO15365	0.000191080236722515
KWMTBOMO08696	KWMTBOMO01001	1.35921274089878e-05
KWMTBOMO08766	KWMTBOMO08464	0.000415202822560014
KWMTBOMO08766	KWMTBOMO01001	0.000696841964312249
KWMTBOMO08766	KWMTBOMO15365	0.000449385915082542
KWMTBOMO08770	KWMTBOMO08464	0.00360097115488675
KWMTBOMO08770	KWMTBOMO01001	0.00336649392055446
KWMTBOMO08770	KWMTBOMO15365	0.00517036428686794
KWMTBOMO08794	KWMTBOMO01001	0.000670672367987568
KWMTBOMO08794	KWMTBOMO08464	3.92457481475293e-05
KWMTBOMO08794	KWMTBOMO15365	0.000124659696777804
KWMTBOMO08795	KWMTBOMO15365	0.000339083796592579
KWMTBOMO08795	KWMTBOMO01001	0.00012430922681347
KWMTBOMO08795	KWMTBOMO08464	0.000188869139566194
KWMTBOMO08824	KWMTBOMO01001	0.0107723273195912
KWMTBOMO08824	KWMTBOMO15365	0.00695919280658198
KWMTBOMO08824	KWMTBOMO08464	0.0085049726007941
KWMTBOMO08827	KWMTBOMO15365	0.00549157382211951
KWMTBOMO08827	KWMTBOMO08464	0.00462088933622733
KWMTBOMO08827	KWMTBOMO01001	0.00447848343622732
KWMTBOMO08866	KWMTBOMO15365	0.00173805119138153
KWMTBOMO08866	KWMTBOMO01001	0.00288833257299071
KWMTBOMO08866	KWMTBOMO08464	0.00234898679535913
KWMTBOMO08936	KWMTBOMO15365	0
KWMTBOMO08936	KWMTBOMO01001	0
KWMTBOMO08936	KWMTBOMO08464	0
KWMTBOMO09006	KWMTBOMO15365	0.000566780771466174
KWMTBOMO09006	KWMTBOMO01001	1.13575803601418e-05
KWMTBOMO09006	KWMTBOMO08464	0.000694529226839286
KWMTBOMO09235	KWMTBOMO15365	0.0103440789939002
KWMTBOMO09235	KWMTBOMO08464	0.00826387010445231
KWMTBOMO09235	KWMTBOMO01001	0.00822519248832916
KWMTBOMO09272	KWMTBOMO08464	0.00118871927361824
KWMTBOMO09272	KWMTBOMO15365	0.00161742247383893
KWMTBOMO09272	KWMTBOMO01001	0.000997389552260487
KWMTBOMO09296	KWMTBOMO01001	0.000327466960896574
KWMTBOMO09296	KWMTBOMO08464	0.00140324678395668
KWMTBOMO09296	KWMTBOMO15365	0.00058225604212792
KWMTBOMO09382	KWMTBOMO08464	0.0134393091338542
KWMTBOMO09382	KWMTBOMO01001	0.00990612034143718
KWMTBOMO09382	KWMTBOMO15365	0.0126613855129897
KWMTBOMO09450	KWMTBOMO15365	0.00189838238850528
KWMTBOMO09450	KWMTBOMO01001	0.00163061305649163
KWMTBOMO09450	KWMTBOMO08464	0.00288978258740909
KWMTBOMO09472	KWMTBOMO01001	0.000513578426249737
KWMTBOMO09472	KWMTBOMO08464	0.000185694344564852
KWMTBOMO09472	KWMTBOMO15365	0.000687197860785879
KWMTBOMO09534	KWMTBOMO01001	0
KWMTBOMO09534	KWMTBOMO08464	0
KWMTBOMO09534	KWMTBOMO15365	0
KWMTBOMO09619	KWMTBOMO15365	0.00407250983920806
KWMTBOMO09619	KWMTBOMO08464	0.00817207741577472
KWMTBOMO09619	KWMTBOMO01001	0.0264851280154697
KWMTBOMO09786	KWMTBOMO01001	0.00312488779093538
KWMTBOMO09786	KWMTBOMO15365	0.00718489935337913
KWMTBOMO09786	KWMTBOMO08464	0.00428010251541631
KWMTBOMO09806	KWMTBOMO15365	7.5471538703317e-05
KWMTBOMO09806	KWMTBOMO08464	0.00138382175229079
KWMTBOMO09806	KWMTBOMO01001	2.96499275591491e-05
KWMTBOMO09826	KWMTBOMO01001	0.000212220139120158
KWMTBOMO09826	KWMTBOMO08464	0.000376758042632672
KWMTBOMO09826	KWMTBOMO15365	0.000196662382456721
KWMTBOMO09933	KWMTBOMO15365	0.00458848717588407
KWMTBOMO09933	KWMTBOMO08464	0.00821728106722486
KWMTBOMO09933	KWMTBOMO01001	0.00590131373964295
KWMTBOMO10004	KWMTBOMO08464	0.000707995842068925
KWMTBOMO10004	KWMTBOMO01001	0.00309264104129948
KWMTBOMO10004	KWMTBOMO15365	0.00501649633120136
KWMTBOMO10172	KWMTBOMO08464	0.0011155042695611
KWMTBOMO10172	KWMTBOMO01001	0.000967655466181566
KWMTBOMO10172	KWMTBOMO15365	0.00170503547762331
KWMTBOMO10214	KWMTBOMO15365	0.00112781317841301
KWMTBOMO10214	KWMTBOMO01001	0.000583473194461999
KWMTBOMO10214	KWMTBOMO08464	0.00206222715041606
KWMTBOMO10307	KWMTBOMO01001	0.000605163112411618
KWMTBOMO10307	KWMTBOMO08464	0.00242078100383455
KWMTBOMO10307	KWMTBOMO15365	0.000873369552202244
KWMTBOMO10413	KWMTBOMO01001	0.00316896637060575
KWMTBOMO10413	KWMTBOMO15365	0.00128324456095353
KWMTBOMO10413	KWMTBOMO08464	0.00136027748283125
KWMTBOMO10414	KWMTBOMO01001	0.00334081737359679
KWMTBOMO10414	KWMTBOMO15365	0.00315589737530045
KWMTBOMO10414	KWMTBOMO08464	0.00429993874691213
KWMTBOMO10429	KWMTBOMO01001	0.000376261677937395
KWMTBOMO10429	KWMTBOMO15365	3.72178594235873e-05
KWMTBOMO10429	KWMTBOMO08464	9.20179968819122e-05
KWMTBOMO10472	KWMTBOMO08464	0.00284874954754145
KWMTBOMO10472	KWMTBOMO15365	0.00381985584001808
KWMTBOMO10472	KWMTBOMO01001	0.0029568121040121
KWMTBOMO10592	KWMTBOMO08464	0.00684344067028929
KWMTBOMO10592	KWMTBOMO15365	0.00496211781833945
KWMTBOMO10592	KWMTBOMO01001	0.0089844865347627
KWMTBOMO10682	KWMTBOMO15365	0.00198926543226526
KWMTBOMO10682	KWMTBOMO08464	0.00142668123215792
KWMTBOMO10682	KWMTBOMO01001	0.00241874674103336
KWMTBOMO10777	KWMTBOMO08464	0.00132844560064086
KWMTBOMO10777	KWMTBOMO15365	3.50751239857551e-05
KWMTBOMO10777	KWMTBOMO01001	1.26437938850455e-05
KWMTBOMO10815	KWMTBOMO08464	0.00588810841690905
KWMTBOMO10815	KWMTBOMO01001	0.0040233206873263
KWMTBOMO10815	KWMTBOMO15365	0.0069642098329679
KWMTBOMO10839	KWMTBOMO01001	0.0014278937859517
KWMTBOMO10839	KWMTBOMO08464	0.000517200406715329
KWMTBOMO10839	KWMTBOMO15365	0.00122886118251077
KWMTBOMO10840	KWMTBOMO01001	0.00031743600212094
KWMTBOMO10840	KWMTBOMO15365	0.000278082071436089
KWMTBOMO10840	KWMTBOMO08464	5.94781924490824e-05
KWMTBOMO10989	KWMTBOMO08464	0.00364312009645373
KWMTBOMO10989	KWMTBOMO15365	0.00630151105887168
KWMTBOMO10989	KWMTBOMO01001	0.00389013182064497
KWMTBOMO10990	KWMTBOMO08464	0
KWMTBOMO10990	KWMTBOMO15365	0
KWMTBOMO10990	KWMTBOMO01001	0
KWMTBOMO11087	KWMTBOMO01001	1.79987423197411e-05
KWMTBOMO11087	KWMTBOMO08464	0.00268400714116996
KWMTBOMO11087	KWMTBOMO15365	8.4464545872864e-05
KWMTBOMO11257	KWMTBOMO01001	0.0119345256549331
KWMTBOMO11257	KWMTBOMO08464	0.00420847401810155
KWMTBOMO11257	KWMTBOMO15365	0.00561906853044287
KWMTBOMO11294	KWMTBOMO08464	0.00736145573233049
KWMTBOMO11294	KWMTBOMO01001	0.0050771699189515
KWMTBOMO11294	KWMTBOMO15365	0.00535398575786157
KWMTBOMO11425	KWMTBOMO01001	0.0077555744944949
KWMTBOMO11425	KWMTBOMO15365	0.00632063415279417
KWMTBOMO11425	KWMTBOMO08464	0.00646964298615541
KWMTBOMO11568	KWMTBOMO01001	0.000304571602740095
KWMTBOMO11568	KWMTBOMO15365	0.00288871889273247
KWMTBOMO11568	KWMTBOMO08464	0.00014741346494762
KWMTBOMO11631	KWMTBOMO01001	0.0133481478212783
KWMTBOMO11631	KWMTBOMO15365	0.011395215181893
KWMTBOMO11631	KWMTBOMO08464	0.0150028693819958
KWMTBOMO11664	KWMTBOMO08464	0.00739802831790324
KWMTBOMO11664	KWMTBOMO01001	0.00292605832501845
KWMTBOMO11664	KWMTBOMO15365	0.00475030553944534
KWMTBOMO11732	KWMTBOMO15365	0
KWMTBOMO11732	KWMTBOMO01001	0
KWMTBOMO11732	KWMTBOMO08464	0
KWMTBOMO11744	KWMTBOMO08464	0.00134135896866626
KWMTBOMO11744	KWMTBOMO01001	0.000800558560420741
KWMTBOMO11744	KWMTBOMO15365	0.00234693989792277
KWMTBOMO11747	KWMTBOMO15365	0
KWMTBOMO11747	KWMTBOMO08464	0
KWMTBOMO11747	KWMTBOMO01001	0
KWMTBOMO11839	KWMTBOMO08464	0.00341014630919964
KWMTBOMO11839	KWMTBOMO15365	0.00362732509379694
KWMTBOMO11839	KWMTBOMO01001	0.00401292090699034
KWMTBOMO11841	KWMTBOMO01001	0
KWMTBOMO11841	KWMTBOMO08464	0
KWMTBOMO11841	KWMTBOMO15365	0
KWMTBOMO11842	KWMTBOMO08464	0.00100871062848614
KWMTBOMO11842	KWMTBOMO01001	0.000932742953891912
KWMTBOMO11842	KWMTBOMO15365	0.000250638565473791
KWMTBOMO11917	KWMTBOMO08464	0.0061707643371951
KWMTBOMO11917	KWMTBOMO01001	0.00740477067045872
KWMTBOMO11917	KWMTBOMO15365	0.0128631501267989
KWMTBOMO12020	KWMTBOMO08464	0.000149386058543006
KWMTBOMO12020	KWMTBOMO15365	7.50760236759878e-05
KWMTBOMO12020	KWMTBOMO01001	2.10545019058705e-05
KWMTBOMO12077	KWMTBOMO08464	4.74833822316505e-05
KWMTBOMO12077	KWMTBOMO01001	0.000326359859382476
KWMTBOMO12077	KWMTBOMO15365	8.18344231945759e-05
KWMTBOMO12079	KWMTBOMO15365	0.000120870743850968
KWMTBOMO12079	KWMTBOMO08464	0.000600397614425534
KWMTBOMO12079	KWMTBOMO01001	0.000759198682520488
KWMTBOMO12084	KWMTBOMO15365	0.00158073106158688
KWMTBOMO12084	KWMTBOMO01001	0.00156945371909458
KWMTBOMO12084	KWMTBOMO08464	0.00151896594623558
KWMTBOMO12108	KWMTBOMO01001	0.00179273225603097
KWMTBOMO12108	KWMTBOMO08464	0.000294862783723757
KWMTBOMO12108	KWMTBOMO15365	0.000227459040094246
KWMTBOMO12525	KWMTBOMO08464	0.000479623401199939
KWMTBOMO12525	KWMTBOMO01001	0.00751611386485232
KWMTBOMO12525	KWMTBOMO15365	0.00257387327348012
KWMTBOMO12662	KWMTBOMO15365	8.26502793779713e-05
KWMTBOMO12662	KWMTBOMO01001	0.000167384743050233
KWMTBOMO12662	KWMTBOMO08464	4.57741171128854e-05
KWMTBOMO12696	KWMTBOMO08464	0.0144735136013213
KWMTBOMO12696	KWMTBOMO15365	0.00945174417775227
KWMTBOMO12696	KWMTBOMO01001	0.0186941178459997
KWMTBOMO12727	KWMTBOMO15365	0.00296501903773359
KWMTBOMO12727	KWMTBOMO08464	0.00210408735071275
KWMTBOMO12727	KWMTBOMO01001	0.00293487309184316
KWMTBOMO12906	KWMTBOMO15365	0.0042440617204156
KWMTBOMO12906	KWMTBOMO01001	0.00256484188200166
KWMTBOMO12906	KWMTBOMO08464	0.00510950463544198
KWMTBOMO12908	KWMTBOMO01001	0
KWMTBOMO12908	KWMTBOMO08464	0
KWMTBOMO12908	KWMTBOMO15365	0
KWMTBOMO12968	KWMTBOMO08464	0.000640326457615944
KWMTBOMO12968	KWMTBOMO15365	0.000317579570094008
KWMTBOMO12968	KWMTBOMO01001	0.00287220220362955
KWMTBOMO13054	KWMTBOMO15365	0.000131843220662809
KWMTBOMO13054	KWMTBOMO01001	0.00034611754874024
KWMTBOMO13054	KWMTBOMO08464	0.000937053991214693
KWMTBOMO13185	KWMTBOMO15365	0.00352477450572386
KWMTBOMO13185	KWMTBOMO08464	0.00381111808120859
KWMTBOMO13185	KWMTBOMO01001	0.00176151206627976
KWMTBOMO13187	KWMTBOMO01001	0.00729253986252532
KWMTBOMO13187	KWMTBOMO15365	0.00446104156331241
KWMTBOMO13187	KWMTBOMO08464	0.0115929628388086
KWMTBOMO13192	KWMTBOMO01001	0.0102751577933577
KWMTBOMO13192	KWMTBOMO08464	0.0080940551897573
KWMTBOMO13192	KWMTBOMO15365	0.00463215280990348
KWMTBOMO13303	KWMTBOMO01001	0.000619194945921372
KWMTBOMO13303	KWMTBOMO15365	0.000636715053944806
KWMTBOMO13303	KWMTBOMO08464	0.00116851825191328
KWMTBOMO13333	KWMTBOMO01001	0.00321819526345291
KWMTBOMO13333	KWMTBOMO08464	0.00387440611914397
KWMTBOMO13333	KWMTBOMO15365	0.0046482320420603
KWMTBOMO13726	KWMTBOMO01001	0
KWMTBOMO13726	KWMTBOMO08464	0
KWMTBOMO13726	KWMTBOMO15365	0
KWMTBOMO13733	KWMTBOMO01001	0.00212022594395187
KWMTBOMO13733	KWMTBOMO08464	0.00103876893896227
KWMTBOMO13733	KWMTBOMO15365	0.00231832369050744
KWMTBOMO13769	KWMTBOMO15365	0.00297813756841653
KWMTBOMO13769	KWMTBOMO08464	0.0028818815825723
KWMTBOMO13769	KWMTBOMO01001	0.000875217633542875
KWMTBOMO13888	KWMTBOMO01001	0.00659843795322494
KWMTBOMO13888	KWMTBOMO15365	0.00716329315470782
KWMTBOMO13888	KWMTBOMO08464	0.00748449044273888
KWMTBOMO13964	KWMTBOMO15365	0.00866322112086732
KWMTBOMO13964	KWMTBOMO08464	0.00820898568919906
KWMTBOMO13964	KWMTBOMO01001	0.00681818295172022
KWMTBOMO14023	KWMTBOMO08464	0.000557710922738928
KWMTBOMO14023	KWMTBOMO01001	0.0038761443486636
KWMTBOMO14023	KWMTBOMO15365	0.0010694895268448
KWMTBOMO14040	KWMTBOMO15365	0
KWMTBOMO14040	KWMTBOMO01001	0
KWMTBOMO14040	KWMTBOMO08464	0
KWMTBOMO14120	KWMTBOMO01001	0.00354011683857629
KWMTBOMO14120	KWMTBOMO15365	0.00493497453719935
KWMTBOMO14120	KWMTBOMO08464	0.0119364748017225
KWMTBOMO14150	KWMTBOMO15365	0
KWMTBOMO14150	KWMTBOMO08464	0
KWMTBOMO14150	KWMTBOMO01001	0
KWMTBOMO14151	KWMTBOMO01001	0.00388318630407884
KWMTBOMO14151	KWMTBOMO08464	0.00455004495293579
KWMTBOMO14151	KWMTBOMO15365	0.00439704642712163
KWMTBOMO14225	KWMTBOMO08464	0.00153940276568524
KWMTBOMO14225	KWMTBOMO15365	0.000167234198363905
KWMTBOMO14225	KWMTBOMO01001	0.000676257308060083
KWMTBOMO14232	KWMTBOMO01001	0.00103119690747467
KWMTBOMO14232	KWMTBOMO08464	0.00176871251720194
KWMTBOMO14232	KWMTBOMO15365	0.00247410347480399
KWMTBOMO14273	KWMTBOMO08464	0.000295822744220809
KWMTBOMO14273	KWMTBOMO01001	0.00107081708856298
KWMTBOMO14273	KWMTBOMO15365	0.00313623463665347
KWMTBOMO14274	KWMTBOMO01001	0.00461937896408999
KWMTBOMO14274	KWMTBOMO15365	0.00353970132136487
KWMTBOMO14274	KWMTBOMO08464	0.00156171099006432
KWMTBOMO14310	KWMTBOMO01001	0.0016794901686126
KWMTBOMO14310	KWMTBOMO15365	0.0030410370397451
KWMTBOMO14310	KWMTBOMO08464	0.00298565947624278
KWMTBOMO14365	KWMTBOMO15365	0.00168062170394075
KWMTBOMO14365	KWMTBOMO01001	0.000263565277100936
KWMTBOMO14365	KWMTBOMO08464	0.000226802503921305
KWMTBOMO14445	KWMTBOMO01001	0
KWMTBOMO14445	KWMTBOMO15365	0
KWMTBOMO14445	KWMTBOMO08464	0
KWMTBOMO14448	KWMTBOMO08464	0.00371883940466076
KWMTBOMO14448	KWMTBOMO01001	0.00678628407123301
KWMTBOMO14448	KWMTBOMO15365	0.00340768949063174
KWMTBOMO14449	KWMTBOMO15365	0.00101071630705423
KWMTBOMO14449	KWMTBOMO08464	0.000946472044419859
KWMTBOMO14449	KWMTBOMO01001	0.000562681313917632
KWMTBOMO14466	KWMTBOMO15365	0.00123329159608082
KWMTBOMO14466	KWMTBOMO08464	0.00190786091306532
KWMTBOMO14466	KWMTBOMO01001	0.00278244798762527
KWMTBOMO14484	KWMTBOMO08464	0.000211457031874903
KWMTBOMO14484	KWMTBOMO01001	0.000659778730798099
KWMTBOMO14484	KWMTBOMO15365	7.67498400339692e-05
KWMTBOMO14488	KWMTBOMO08464	0.00582714135381278
KWMTBOMO14488	KWMTBOMO15365	0.00521341936317205
KWMTBOMO14488	KWMTBOMO01001	0.0067427243336849
KWMTBOMO14524	KWMTBOMO15365	0.000257112423926031
KWMTBOMO14524	KWMTBOMO01001	1.38286323907559e-05
KWMTBOMO14524	KWMTBOMO08464	1.01137701038491e-05
KWMTBOMO14537	KWMTBOMO01001	0.00660955308930153
KWMTBOMO14537	KWMTBOMO08464	0.00462525598182841
KWMTBOMO14537	KWMTBOMO15365	0.00133822481533772
KWMTBOMO14572	KWMTBOMO08464	0.00122715535968696
KWMTBOMO14572	KWMTBOMO01001	0.000969171968765372
KWMTBOMO14572	KWMTBOMO15365	0.00114474772626809
KWMTBOMO14576	KWMTBOMO08464	0.00227581261293773
KWMTBOMO14576	KWMTBOMO01001	0.000584991343979444
KWMTBOMO14576	KWMTBOMO15365	0.00135951215990903
KWMTBOMO14578	KWMTBOMO01001	0.00286414574382646
KWMTBOMO14578	KWMTBOMO15365	0.00301479888112142
KWMTBOMO14578	KWMTBOMO08464	0.00192519092849154
KWMTBOMO14579	KWMTBOMO08464	0.00251304526302291
KWMTBOMO14579	KWMTBOMO15365	0.00117773270267499
KWMTBOMO14579	KWMTBOMO01001	0.00315746790306325
KWMTBOMO14586	KWMTBOMO08464	0.00131126048030942
KWMTBOMO14586	KWMTBOMO15365	0.00342934979457757
KWMTBOMO14586	KWMTBOMO01001	0.0012845383278101
KWMTBOMO14587	KWMTBOMO15365	0.000890630825434693
KWMTBOMO14587	KWMTBOMO01001	0.00111953784984187
KWMTBOMO14587	KWMTBOMO08464	0.00163349347324788
KWMTBOMO14594	KWMTBOMO15365	0.000923533647960468
KWMTBOMO14594	KWMTBOMO01001	0.000367924417675244
KWMTBOMO14594	KWMTBOMO08464	7.91457964084525e-05
KWMTBOMO14596	KWMTBOMO08464	0.00154192205655139
KWMTBOMO14596	KWMTBOMO15365	0.00184552113980722
KWMTBOMO14596	KWMTBOMO01001	0.00184255217276086
KWMTBOMO14604	KWMTBOMO15365	0.00335232229635066
KWMTBOMO14604	KWMTBOMO01001	0.00230867645148922
KWMTBOMO14604	KWMTBOMO08464	0.000843109405033534
KWMTBOMO14682	KWMTBOMO01001	0.00163858127669221
KWMTBOMO14682	KWMTBOMO08464	0.00206320320621355
KWMTBOMO14682	KWMTBOMO15365	0.00180425511864559
KWMTBOMO14816	KWMTBOMO15365	0.00904392630700308
KWMTBOMO14816	KWMTBOMO01001	0.00878846295776394
KWMTBOMO14816	KWMTBOMO08464	0.0108952924145429
KWMTBOMO14838	KWMTBOMO01001	0.00122047221876272
KWMTBOMO14838	KWMTBOMO15365	0.000860573177364235
KWMTBOMO14838	KWMTBOMO08464	0.000954923104039189
KWMTBOMO14869	KWMTBOMO15365	0.00169015828163209
KWMTBOMO14869	KWMTBOMO08464	0.0026844484409534
KWMTBOMO14869	KWMTBOMO01001	0.00293540201214574
KWMTBOMO14890	KWMTBOMO15365	0.000439021115232969
KWMTBOMO14890	KWMTBOMO08464	0.000761520409186119
KWMTBOMO14890	KWMTBOMO01001	0.00154730021953745
KWMTBOMO14892	KWMTBOMO01001	0.00357748337447373
KWMTBOMO14892	KWMTBOMO15365	0.000349201718875651
KWMTBOMO14892	KWMTBOMO08464	0.00144915084684935
KWMTBOMO14977	KWMTBOMO01001	3.28367854249839e-05
KWMTBOMO14977	KWMTBOMO08464	0.000180762474255024
KWMTBOMO14977	KWMTBOMO15365	0.00020644415241681
KWMTBOMO15061	KWMTBOMO08464	0.00953492514327781
KWMTBOMO15061	KWMTBOMO01001	0.0104228267519089
KWMTBOMO15061	KWMTBOMO15365	0.0072890630942953
KWMTBOMO15132	KWMTBOMO15365	0.00113136985069938
KWMTBOMO15132	KWMTBOMO01001	0.0011795278568524
KWMTBOMO15132	KWMTBOMO08464	0.00228470402098565
KWMTBOMO15178	KWMTBOMO08464	0.00488476127220793
KWMTBOMO15178	KWMTBOMO01001	0.00384106830312078
KWMTBOMO15178	KWMTBOMO15365	0.000855875645746197
KWMTBOMO15188	KWMTBOMO01001	0.00188864409223814
KWMTBOMO15188	KWMTBOMO15365	0.00179283477786094
KWMTBOMO15188	KWMTBOMO08464	0.00301493400206081
KWMTBOMO15201	KWMTBOMO01001	6.62661444888812e-05
KWMTBOMO15201	KWMTBOMO15365	1.81342231905612e-05
KWMTBOMO15201	KWMTBOMO08464	0.000304912106932453
KWMTBOMO15317	KWMTBOMO15365	0.00113623611734463
KWMTBOMO15317	KWMTBOMO08464	0.0014014291460992
KWMTBOMO15317	KWMTBOMO01001	0.0114943323748504
KWMTBOMO15319	KWMTBOMO01001	0.00364899045529319
KWMTBOMO15319	KWMTBOMO08464	0.00149538212214863
KWMTBOMO15319	KWMTBOMO15365	0.00260364523509282
KWMTBOMO15340	KWMTBOMO15365	0.0100553889866243
KWMTBOMO15340	KWMTBOMO01001	0.0101569781371113
KWMTBOMO15340	KWMTBOMO08464	0.0104462368844339
KWMTBOMO15363	KWMTBOMO08464	0.00235194231947613
KWMTBOMO15363	KWMTBOMO15365	0.00109380630430261
KWMTBOMO15363	KWMTBOMO01001	0.00148193351480369
KWMTBOMO15377	KWMTBOMO01001	0.00156674104115001
KWMTBOMO15377	KWMTBOMO08464	0.00439951407997303
KWMTBOMO15377	KWMTBOMO15365	0.00254816629503138
KWMTBOMO15563	KWMTBOMO15365	0.000440294909275156
KWMTBOMO15563	KWMTBOMO08464	3.59489406747595e-05
KWMTBOMO15563	KWMTBOMO01001	0.000291895090839671
KWMTBOMO15603	KWMTBOMO08464	0.00161814154959472
KWMTBOMO15603	KWMTBOMO01001	0.0010019999094792
KWMTBOMO15603	KWMTBOMO15365	0.00373268250571366
KWMTBOMO15605	KWMTBOMO15365	0.00113268834054267
KWMTBOMO15605	KWMTBOMO08464	0.0012048131755614
KWMTBOMO15605	KWMTBOMO01001	0.000833020090427929
KWMTBOMO15606	KWMTBOMO15365	0.00280837647712649
KWMTBOMO15606	KWMTBOMO01001	0.00337873179362229
KWMTBOMO15606	KWMTBOMO08464	0.00308687598940267
KWMTBOMO15608	KWMTBOMO01001	0.0033281895573877
KWMTBOMO15608	KWMTBOMO15365	0.00363384420411366
KWMTBOMO15608	KWMTBOMO08464	0.00308915925163171
KWMTBOMO15609	KWMTBOMO01001	0.00581963108326831
KWMTBOMO15609	KWMTBOMO08464	0.00168308060883183
KWMTBOMO15609	KWMTBOMO15365	0.00189610476441418
KWMTBOMO15619	KWMTBOMO01001	0.0041369052773096
KWMTBOMO15619	KWMTBOMO08464	0.00111542320630044
KWMTBOMO15619	KWMTBOMO15365	0.00192832496581065
KWMTBOMO15627	KWMTBOMO15365	0.00860334259227076
KWMTBOMO15627	KWMTBOMO01001	0.00931196311467349
KWMTBOMO15627	KWMTBOMO08464	0.0140147368907975
KWMTBOMO15655	KWMTBOMO01001	0
KWMTBOMO15655	KWMTBOMO08464	0
KWMTBOMO15655	KWMTBOMO15365	0
KWMTBOMO15674	KWMTBOMO15365	0.00532168180003216
KWMTBOMO15674	KWMTBOMO08464	0.00304131638870127
KWMTBOMO15674	KWMTBOMO01001	0.00469207418550868
KWMTBOMO15713	KWMTBOMO15365	0.00137672752599058
KWMTBOMO15713	KWMTBOMO01001	0.00343952538242867
KWMTBOMO15713	KWMTBOMO08464	0.002671507855321
KWMTBOMO15965	KWMTBOMO01001	0.00553215123785238
KWMTBOMO15965	KWMTBOMO08464	0.00326433162934961
KWMTBOMO15965	KWMTBOMO15365	0.00359099030172488
KWMTBOMO16068	KWMTBOMO15365	0.000360398812268832
KWMTBOMO16068	KWMTBOMO01001	0.000744823876224401
KWMTBOMO16068	KWMTBOMO08464	7.21604456746254e-05
KWMTBOMO16070	KWMTBOMO01001	0.000317277240945769
KWMTBOMO16070	KWMTBOMO15365	0.000178315082705861
KWMTBOMO16070	KWMTBOMO08464	0.000495113436817877
KWMTBOMO16127	KWMTBOMO08464	0.00350201025266949
KWMTBOMO16127	KWMTBOMO01001	0.00303191062927476
KWMTBOMO16127	KWMTBOMO15365	0.0023579774958051
KWMTBOMO16231	KWMTBOMO01001	0.000922539578066284
KWMTBOMO16231	KWMTBOMO15365	0.00405191339914161
KWMTBOMO16231	KWMTBOMO08464	0.0049855022650845
KWMTBOMO16476	KWMTBOMO08464	0.00236665109369085
KWMTBOMO16476	KWMTBOMO15365	0.000117106412195176
KWMTBOMO16476	KWMTBOMO01001	9.27247078893824e-05
KWMTBOMO16482	KWMTBOMO15365	0.00303939300321699
KWMTBOMO16482	KWMTBOMO08464	0.00284374291877571
KWMTBOMO16482	KWMTBOMO01001	0.00336951989557133
KWMTBOMO16531	KWMTBOMO08464	0.00117379277746972
KWMTBOMO16531	KWMTBOMO15365	0.00214554796081182
KWMTBOMO16531	KWMTBOMO01001	0.00260828348282613
KWMTBOMO16649	KWMTBOMO15365	0.0761649656110004
KWMTBOMO16649	KWMTBOMO01001	0.0392772063680844
KWMTBOMO16649	KWMTBOMO08464	0.0289253913539014
KWMTBOMO16788	KWMTBOMO08464	0.00100069221477298
KWMTBOMO16788	KWMTBOMO15365	0.00136246282566504
KWMTBOMO16788	KWMTBOMO01001	0.000578637097349851

## Sheet: stP_C2
regulatoryGene	targetGene	weight
KWMTBOMO06968	KWMTBOMO08464	9.66650523942039e-05
KWMTBOMO15201	KWMTBOMO15365	9.43876207867513e-05
KWMTBOMO04908	KWMTBOMO08464	9.4213387342161e-05
KWMTBOMO00660	KWMTBOMO15365	9.37413694046052e-05
KWMTBOMO15132	KWMTBOMO01001	9.00466185494315e-05
KWMTBOMO05086	KWMTBOMO15365	8.90000426424466e-05
KWMTBOMO14449	KWMTBOMO01001	8.79022944397288e-05
KWMTBOMO02050	KWMTBOMO15365	8.77566877608077e-06
KWMTBOMO08603	KWMTBOMO15365	8.69546070440171e-05
KWMTBOMO06269	KWMTBOMO15365	8.56395592756578e-06
KWMTBOMO11839	KWMTBOMO08464	8.21521170128084e-05
KWMTBOMO06269	KWMTBOMO01001	8.17448033477122e-06
KWMTBOMO16068	KWMTBOMO08464	8.11422007894218e-05
KWMTBOMO03283	KWMTBOMO15365	7.75994990016094e-05
KWMTBOMO07048	KWMTBOMO08464	7.52022365899459e-05
KWMTBOMO09296	KWMTBOMO15365	6.96062327694407e-05
KWMTBOMO08664	KWMTBOMO08464	6.95560729166786e-05
KWMTBOMO12079	KWMTBOMO08464	6.71057497176331e-05
KWMTBOMO16068	KWMTBOMO15365	6.67238149921267e-05
KWMTBOMO16531	KWMTBOMO01001	6.3698560638541e-05
KWMTBOMO06201	KWMTBOMO01001	6.16274610010674e-05
KWMTBOMO12108	KWMTBOMO01001	6.11837711466421e-05
KWMTBOMO05086	KWMTBOMO08464	5.56702953436078e-05
KWMTBOMO16070	KWMTBOMO15365	5.47220530962623e-05
KWMTBOMO03284	KWMTBOMO08464	5.31721462149178e-05
KWMTBOMO13054	KWMTBOMO01001	5.20170054233606e-05
KWMTBOMO06968	KWMTBOMO15365	5.05778750785435e-05
KWMTBOMO08403	KWMTBOMO15365	4.97109931101469e-05
KWMTBOMO16531	KWMTBOMO08464	4.56712564539121e-05
KWMTBOMO08766	KWMTBOMO01001	4.1244331830913e-05
KWMTBOMO07048	KWMTBOMO15365	3.50346345599211e-05
KWMTBOMO06247	KWMTBOMO01001	3.3124402117608e-05
KWMTBOMO09826	KWMTBOMO01001	2.71596475271052e-05
KWMTBOMO16531	KWMTBOMO15365	2.64793265557815e-05
KWMTBOMO11842	KWMTBOMO01001	2.20896927678795e-05
KWMTBOMO06247	KWMTBOMO15365	1.9533618144421e-05
KWMTBOMO06269	KWMTBOMO08464	1.54955251094316e-05
KWMTBOMO06247	KWMTBOMO08464	1.48959613858903e-05
KWMTBOMO02050	KWMTBOMO01001	1.2771385197235e-05
KWMTBOMO04674	KWMTBOMO15365	0.0691803647185349
KWMTBOMO00339	KWMTBOMO15365	0.0657855788581742
KWMTBOMO16649	KWMTBOMO15365	0.0499339941034689
KWMTBOMO00339	KWMTBOMO01001	0.0420310261815155
KWMTBOMO02734	KWMTBOMO08464	0.0378904969746045
KWMTBOMO02734	KWMTBOMO01001	0.0366593371428008
KWMTBOMO16649	KWMTBOMO01001	0.0352160353844054
KWMTBOMO12968	KWMTBOMO15365	0.0342887614078468
KWMTBOMO07798	KWMTBOMO08464	0.0321638318027975
KWMTBOMO00339	KWMTBOMO08464	0.0321465038915866
KWMTBOMO02734	KWMTBOMO15365	0.031374955603031
KWMTBOMO16649	KWMTBOMO08464	0.0299941259499251
KWMTBOMO07798	KWMTBOMO15365	0.0213321835359249
KWMTBOMO08662	KWMTBOMO01001	0.020137498877885
KWMTBOMO04674	KWMTBOMO01001	0.0184896024345406
KWMTBOMO07389	KWMTBOMO01001	0.0177231294891602
KWMTBOMO15340	KWMTBOMO15365	0.0173297193217046
KWMTBOMO10307	KWMTBOMO08464	0.0167850789082525
KWMTBOMO02790	KWMTBOMO15365	0.0164361292052135
KWMTBOMO15340	KWMTBOMO01001	0.0163796556316343
KWMTBOMO13192	KWMTBOMO01001	0.0161528967113961
KWMTBOMO11257	KWMTBOMO15365	0.0161117208654744
KWMTBOMO05846	KWMTBOMO08464	0.015891933843896
KWMTBOMO12696	KWMTBOMO08464	0.0148697844222457
KWMTBOMO02820	KWMTBOMO15365	0.0147579882814788
KWMTBOMO11425	KWMTBOMO15365	0.014748281194017
KWMTBOMO03297	KWMTBOMO01001	0.01431242899238
KWMTBOMO05926	KWMTBOMO15365	0.0143065198359794
KWMTBOMO00314	KWMTBOMO01001	0.0142787652349345
KWMTBOMO01948	KWMTBOMO15365	0.0135825863339074
KWMTBOMO07389	KWMTBOMO08464	0.0133788441796485
KWMTBOMO03297	KWMTBOMO15365	0.0133690826481715
KWMTBOMO14816	KWMTBOMO01001	0.0133640642721345
KWMTBOMO04106	KWMTBOMO08464	0.0132191371330539
KWMTBOMO06713	KWMTBOMO08464	0.013143512691394
KWMTBOMO04106	KWMTBOMO15365	0.0128689492211774
KWMTBOMO04674	KWMTBOMO08464	0.0126262282571351
KWMTBOMO01036	KWMTBOMO01001	0.0126229359437695
KWMTBOMO02424	KWMTBOMO15365	0.0126078513103261
KWMTBOMO04106	KWMTBOMO01001	0.01248223554089
KWMTBOMO05445	KWMTBOMO01001	0.0123903312383974
KWMTBOMO05926	KWMTBOMO01001	0.012109978490721
KWMTBOMO11631	KWMTBOMO01001	0.0119640763493225
KWMTBOMO05890	KWMTBOMO15365	0.0118229239265417
KWMTBOMO07389	KWMTBOMO15365	0.0116607751328868
KWMTBOMO07798	KWMTBOMO01001	0.0115919098425937
KWMTBOMO01036	KWMTBOMO15365	0.0114701662363233
KWMTBOMO13888	KWMTBOMO08464	0.0109678142999942
KWMTBOMO15061	KWMTBOMO08464	0.0109564842860491
KWMTBOMO05926	KWMTBOMO08464	0.0107221145553708
KWMTBOMO14484	KWMTBOMO15365	0.0106067877421019
KWMTBOMO04027	KWMTBOMO08464	0.0104436580587773
KWMTBOMO11631	KWMTBOMO08464	0.0103649780541544
KWMTBOMO12696	KWMTBOMO15365	0.0102338389272288
KWMTBOMO15627	KWMTBOMO08464	0.0101536940850202
KWMTBOMO07403	KWMTBOMO01001	0.0100997360797013
KWMTBOMO12696	KWMTBOMO01001	0.00999331021602123
KWMTBOMO04910	KWMTBOMO15365	0.0099806537887041
KWMTBOMO15340	KWMTBOMO08464	0.00997668649830197
KWMTBOMO10414	KWMTBOMO08464	0.0099054606144532
KWMTBOMO05890	KWMTBOMO08464	0.00989595651912074
KWMTBOMO05890	KWMTBOMO01001	0.00982765144842326
KWMTBOMO13888	KWMTBOMO15365	0.00981682216812374
KWMTBOMO05445	KWMTBOMO08464	0.00979419365269927
KWMTBOMO02424	KWMTBOMO01001	0.00964266969976215
KWMTBOMO07058	KWMTBOMO01001	0.0092341774524839
KWMTBOMO02820	KWMTBOMO08464	0.0091741465329517
KWMTBOMO10307	KWMTBOMO01001	0.00905193134772034
KWMTBOMO03312	KWMTBOMO15365	0.00883418920158973
KWMTBOMO15965	KWMTBOMO08464	0.00881033980112091
KWMTBOMO03312	KWMTBOMO01001	0.00878180074161168
KWMTBOMO02820	KWMTBOMO01001	0.00865905829061142
KWMTBOMO02748	KWMTBOMO08464	0.0085639880735338
KWMTBOMO01879	KWMTBOMO08464	0.00846899674243917
KWMTBOMO15061	KWMTBOMO15365	0.00845978003966011
KWMTBOMO03312	KWMTBOMO08464	0.0084035906034763
KWMTBOMO04027	KWMTBOMO01001	0.00832983375946124
KWMTBOMO08824	KWMTBOMO15365	0.00831856145761605
KWMTBOMO08612	KWMTBOMO08464	0.00826385088725561
KWMTBOMO14816	KWMTBOMO08464	0.00821190390369838
KWMTBOMO06372	KWMTBOMO01001	0.0081463724406884
KWMTBOMO11631	KWMTBOMO15365	0.00802577658584113
KWMTBOMO03297	KWMTBOMO08464	0.00796615130267826
KWMTBOMO01444	KWMTBOMO08464	0.00794883155772031
KWMTBOMO11425	KWMTBOMO01001	0.00788166480327125
KWMTBOMO07058	KWMTBOMO08464	0.00787846526589175
KWMTBOMO01036	KWMTBOMO08464	0.00780423258333649
KWMTBOMO13192	KWMTBOMO08464	0.0077949733075906
KWMTBOMO13769	KWMTBOMO01001	0.00777532196817945
KWMTBOMO15655	KWMTBOMO08464	0.00777028171145244
KWMTBOMO15674	KWMTBOMO08464	0.00776516673396094
KWMTBOMO08824	KWMTBOMO01001	0.00775259463716164
KWMTBOMO14488	KWMTBOMO08464	0.00771107290638037
KWMTBOMO01078	KWMTBOMO08464	0.00771053446159972
KWMTBOMO12968	KWMTBOMO01001	0.00769164914868158
KWMTBOMO02424	KWMTBOMO08464	0.00746405862860682
KWMTBOMO08612	KWMTBOMO01001	0.00745350482485894
KWMTBOMO03338	KWMTBOMO01001	0.00745199656926317
KWMTBOMO15965	KWMTBOMO01001	0.00734769702422343
KWMTBOMO03338	KWMTBOMO15365	0.00711032845192724
KWMTBOMO01879	KWMTBOMO01001	0.00710364513409956
KWMTBOMO09382	KWMTBOMO01001	0.00704591852580805
KWMTBOMO04591	KWMTBOMO08464	0.00698540954949147
KWMTBOMO09235	KWMTBOMO08464	0.00695691826957574
KWMTBOMO09382	KWMTBOMO08464	0.0069448522496979
KWMTBOMO14816	KWMTBOMO15365	0.00688405783444898
KWMTBOMO11257	KWMTBOMO08464	0.00686170077308111
KWMTBOMO05846	KWMTBOMO01001	0.00682574896312657
KWMTBOMO02277	KWMTBOMO08464	0.00677315639548208
KWMTBOMO10307	KWMTBOMO15365	0.0067300140937386
KWMTBOMO01408	KWMTBOMO01001	0.00668766134010751
KWMTBOMO02834	KWMTBOMO01001	0.006602930693315
KWMTBOMO06071	KWMTBOMO01001	0.0065821240677575
KWMTBOMO13888	KWMTBOMO01001	0.00658122114765913
KWMTBOMO01948	KWMTBOMO01001	0.00657555654245559
KWMTBOMO11257	KWMTBOMO01001	0.00654262611715013
KWMTBOMO14274	KWMTBOMO01001	0.0065262760090257
KWMTBOMO01794	KWMTBOMO01001	0.00643659113278597
KWMTBOMO12968	KWMTBOMO08464	0.00641105546414534
KWMTBOMO01794	KWMTBOMO15365	0.00634791383464484
KWMTBOMO09235	KWMTBOMO01001	0.00632549314351588
KWMTBOMO09933	KWMTBOMO01001	0.00625305536115225
KWMTBOMO06191	KWMTBOMO08464	0.00625143975507468
KWMTBOMO08824	KWMTBOMO08464	0.0061985386864711
KWMTBOMO11917	KWMTBOMO01001	0.00619163477702925
KWMTBOMO15178	KWMTBOMO15365	0.00617041247517663
KWMTBOMO02272	KWMTBOMO01001	0.0061568567235831
KWMTBOMO11568	KWMTBOMO01001	0.00614531253354052
KWMTBOMO01956	KWMTBOMO15365	0.00613171769665027
KWMTBOMO03338	KWMTBOMO08464	0.00612834981971642
KWMTBOMO04027	KWMTBOMO15365	0.00611026042378029
KWMTBOMO06372	KWMTBOMO08464	0.0061052386642297
KWMTBOMO04407	KWMTBOMO15365	0.00604589995830045
KWMTBOMO10172	KWMTBOMO01001	0.00603936428899435
KWMTBOMO14682	KWMTBOMO15365	0.00603894467223783
KWMTBOMO11732	KWMTBOMO15365	0.00601667504374932
KWMTBOMO04910	KWMTBOMO01001	0.00601614807421779
KWMTBOMO13964	KWMTBOMO01001	0.00601035385287193
KWMTBOMO13192	KWMTBOMO15365	0.00599101223183122
KWMTBOMO05445	KWMTBOMO15365	0.00596666612039847
KWMTBOMO04910	KWMTBOMO08464	0.00595531745090747
KWMTBOMO06130	KWMTBOMO01001	0.00593197772222987
KWMTBOMO08662	KWMTBOMO15365	0.00587929061012496
KWMTBOMO15965	KWMTBOMO15365	0.00584699528062078
KWMTBOMO14596	KWMTBOMO08464	0.00582538343612936
KWMTBOMO07506	KWMTBOMO08464	0.0058095936864957
KWMTBOMO06085	KWMTBOMO01001	0.00580153106590667
KWMTBOMO12906	KWMTBOMO08464	0.00576954654687341
KWMTBOMO02790	KWMTBOMO08464	0.00572014313805348
KWMTBOMO11425	KWMTBOMO08464	0.00571636019722194
KWMTBOMO03284	KWMTBOMO01001	0.00569840014825457
KWMTBOMO07058	KWMTBOMO15365	0.00566346064704412
KWMTBOMO09786	KWMTBOMO15365	0.00564340286564526
KWMTBOMO05718	KWMTBOMO01001	0.00560001710937457
KWMTBOMO02579	KWMTBOMO01001	0.00553470411143289
KWMTBOMO08612	KWMTBOMO15365	0.00552890314607762
KWMTBOMO06924	KWMTBOMO15365	0.00551496717148402
KWMTBOMO13769	KWMTBOMO08464	0.00546866312923335
KWMTBOMO02719	KWMTBOMO08464	0.00544991848281825
KWMTBOMO06080	KWMTBOMO08464	0.00544693042022821
KWMTBOMO14232	KWMTBOMO08464	0.00531815991944235
KWMTBOMO06191	KWMTBOMO01001	0.00525802197827
KWMTBOMO14484	KWMTBOMO08464	0.00522697639579163
KWMTBOMO09619	KWMTBOMO01001	0.00517838271752742
KWMTBOMO14488	KWMTBOMO15365	0.00517053169516238
KWMTBOMO01408	KWMTBOMO15365	0.0051613578549359
KWMTBOMO15627	KWMTBOMO15365	0.00511769343739823
KWMTBOMO02188	KWMTBOMO01001	0.00506395924487014
KWMTBOMO05232	KWMTBOMO08464	0.00506069506560121
KWMTBOMO08005	KWMTBOMO08464	0.00498252480800584
KWMTBOMO14488	KWMTBOMO01001	0.00497751766837823
KWMTBOMO09933	KWMTBOMO08464	0.00495478888193112
KWMTBOMO09786	KWMTBOMO08464	0.00490580545643977
KWMTBOMO15674	KWMTBOMO15365	0.00490263430201624
KWMTBOMO05846	KWMTBOMO15365	0.0049019487844977
KWMTBOMO15627	KWMTBOMO01001	0.00488254108695533
KWMTBOMO07506	KWMTBOMO01001	0.0047979805896305
KWMTBOMO13769	KWMTBOMO15365	0.00478442042449259
KWMTBOMO06080	KWMTBOMO15365	0.00477072504065522
KWMTBOMO03418	KWMTBOMO08464	0.00475539058668703
KWMTBOMO14023	KWMTBOMO08464	0.00473614262724001
KWMTBOMO02579	KWMTBOMO08464	0.00470401532733478
KWMTBOMO01078	KWMTBOMO01001	0.00467998079181423
KWMTBOMO09619	KWMTBOMO08464	0.00466806622494994
KWMTBOMO09235	KWMTBOMO15365	0.00465850327524041
KWMTBOMO15061	KWMTBOMO01001	0.0046420672857679
KWMTBOMO14587	KWMTBOMO15365	0.00463579084302355
KWMTBOMO00314	KWMTBOMO08464	0.00463091745787563
KWMTBOMO10172	KWMTBOMO08464	0.00462586401039128
KWMTBOMO14120	KWMTBOMO01001	0.00462025804222539
KWMTBOMO07252	KWMTBOMO08464	0.00457403747474264
KWMTBOMO14448	KWMTBOMO08464	0.00453299627674702
KWMTBOMO14274	KWMTBOMO08464	0.00452964443027604
KWMTBOMO06920	KWMTBOMO01001	0.00451904621323244
KWMTBOMO09786	KWMTBOMO01001	0.0045089692613517
KWMTBOMO15363	KWMTBOMO08464	0.00446913103189995
KWMTBOMO09006	KWMTBOMO01001	0.00446614985036584
KWMTBOMO15363	KWMTBOMO01001	0.00446167563731479
KWMTBOMO05718	KWMTBOMO08464	0.00445917140623662
KWMTBOMO06982	KWMTBOMO01001	0.00445820366615092
KWMTBOMO13187	KWMTBOMO08464	0.00444666829416231
KWMTBOMO04133	KWMTBOMO01001	0.00443946223327401
KWMTBOMO08770	KWMTBOMO08464	0.00442858908950602
KWMTBOMO01444	KWMTBOMO01001	0.00438739799665566
KWMTBOMO08662	KWMTBOMO08464	0.0043441948026516
KWMTBOMO02790	KWMTBOMO01001	0.00433819010045547
KWMTBOMO08770	KWMTBOMO01001	0.00433420180983172
KWMTBOMO06821	KWMTBOMO01001	0.00431263550358254
KWMTBOMO07397	KWMTBOMO15365	0.00428503066689133
KWMTBOMO07507	KWMTBOMO01001	0.00427005648048723
KWMTBOMO03418	KWMTBOMO15365	0.00425266656640955
KWMTBOMO13964	KWMTBOMO15365	0.00423325717891844
KWMTBOMO03777	KWMTBOMO08464	0.0042310316777822
KWMTBOMO02748	KWMTBOMO01001	0.00422972553594495
KWMTBOMO01879	KWMTBOMO15365	0.00422382595742757
KWMTBOMO04407	KWMTBOMO08464	0.00415766584008113
KWMTBOMO13964	KWMTBOMO08464	0.00415148098783179
KWMTBOMO11917	KWMTBOMO15365	0.00414834349702677
KWMTBOMO01078	KWMTBOMO15365	0.00414641251927411
KWMTBOMO04591	KWMTBOMO01001	0.00406919682501845
KWMTBOMO02834	KWMTBOMO15365	0.00405469280913798
KWMTBOMO03869	KWMTBOMO01001	0.00402502217765868
KWMTBOMO10472	KWMTBOMO01001	0.00399251870768643
KWMTBOMO01408	KWMTBOMO08464	0.00398855140867702
KWMTBOMO14225	KWMTBOMO15365	0.00396588592312365
KWMTBOMO14596	KWMTBOMO15365	0.00394519773348754
KWMTBOMO10214	KWMTBOMO08464	0.00394414924357802
KWMTBOMO01444	KWMTBOMO15365	0.00393776546461762
KWMTBOMO01948	KWMTBOMO08464	0.00390295451070558
KWMTBOMO14274	KWMTBOMO15365	0.0038943380747369
KWMTBOMO02188	KWMTBOMO08464	0.00387397332115605
KWMTBOMO15317	KWMTBOMO01001	0.00385803105230388
KWMTBOMO02188	KWMTBOMO15365	0.00384759729926363
KWMTBOMO09933	KWMTBOMO15365	0.00381298198627041
KWMTBOMO03288	KWMTBOMO01001	0.00377020555038389
KWMTBOMO15608	KWMTBOMO01001	0.00373819350345989
KWMTBOMO09382	KWMTBOMO15365	0.00373221622999438
KWMTBOMO05076	KWMTBOMO01001	0.00371371690682061
KWMTBOMO01186	KWMTBOMO08464	0.00370325203425181
KWMTBOMO05058	KWMTBOMO01001	0.00369682335081709
KWMTBOMO12906	KWMTBOMO01001	0.00368422699241671
KWMTBOMO11732	KWMTBOMO01001	0.00367043781861642
KWMTBOMO01366	KWMTBOMO15365	0.00366329709011524
KWMTBOMO02579	KWMTBOMO15365	0.00365870951730455
KWMTBOMO11568	KWMTBOMO15365	0.00363959949180087
KWMTBOMO09619	KWMTBOMO15365	0.00362013291390219
KWMTBOMO03869	KWMTBOMO15365	0.00358638614037381
KWMTBOMO15603	KWMTBOMO15365	0.00356586663026176
KWMTBOMO06205	KWMTBOMO01001	0.00354452087518106
KWMTBOMO06713	KWMTBOMO01001	0.0035241435533563
KWMTBOMO06372	KWMTBOMO15365	0.00351689041053044
KWMTBOMO05847	KWMTBOMO08464	0.00351651706841553
KWMTBOMO11917	KWMTBOMO08464	0.00350163787077176
KWMTBOMO11087	KWMTBOMO08464	0.00345822459892908
KWMTBOMO14537	KWMTBOMO01001	0.00345235134334884
KWMTBOMO13333	KWMTBOMO15365	0.00344386514183239
KWMTBOMO01121	KWMTBOMO08464	0.00340641605786387
KWMTBOMO13187	KWMTBOMO15365	0.00340223246729015
KWMTBOMO14120	KWMTBOMO08464	0.00340166547057755
KWMTBOMO13187	KWMTBOMO01001	0.00339266282044413
KWMTBOMO04507	KWMTBOMO08464	0.0033878775456388
KWMTBOMO10472	KWMTBOMO08464	0.0033853741865579
KWMTBOMO01186	KWMTBOMO01001	0.003370507778136
KWMTBOMO02738	KWMTBOMO01001	0.00334005986966749
KWMTBOMO06120	KWMTBOMO08464	0.00332972084369482
KWMTBOMO11294	KWMTBOMO01001	0.00332117407762923
KWMTBOMO06920	KWMTBOMO15365	0.00331388363489679
KWMTBOMO06071	KWMTBOMO15365	0.0032958843971151
KWMTBOMO10682	KWMTBOMO01001	0.00326753205902845
KWMTBOMO04133	KWMTBOMO08464	0.00325418223346222
KWMTBOMO14225	KWMTBOMO01001	0.00322805171441563
KWMTBOMO01186	KWMTBOMO15365	0.00322066005172489
KWMTBOMO14682	KWMTBOMO08464	0.00320425560987082
KWMTBOMO15178	KWMTBOMO08464	0.00318564092310118
KWMTBOMO00314	KWMTBOMO15365	0.00317288006220967
KWMTBOMO08361	KWMTBOMO15365	0.00315857317959985
KWMTBOMO10592	KWMTBOMO01001	0.0031535629361627
KWMTBOMO05718	KWMTBOMO15365	0.00314436207259762
KWMTBOMO14151	KWMTBOMO08464	0.00313698783278804
KWMTBOMO13333	KWMTBOMO01001	0.00313668775706098
KWMTBOMO08795	KWMTBOMO08464	0.00312678863710622
KWMTBOMO04675	KWMTBOMO15365	0.0031176877405245
KWMTBOMO06191	KWMTBOMO15365	0.00311714282478633
KWMTBOMO15608	KWMTBOMO15365	0.0030938257917999
KWMTBOMO12084	KWMTBOMO08464	0.0030500460891207
KWMTBOMO16127	KWMTBOMO15365	0.0030490214185448
KWMTBOMO08005	KWMTBOMO01001	0.00304249548339295
KWMTBOMO14466	KWMTBOMO15365	0.00300442751803372
KWMTBOMO03240	KWMTBOMO08464	0.00299771815486859
KWMTBOMO05671	KWMTBOMO08464	0.00299354481616977
KWMTBOMO14838	KWMTBOMO01001	0.00299213952298838
KWMTBOMO03869	KWMTBOMO08464	0.00297494567498709
KWMTBOMO06080	KWMTBOMO01001	0.00297482716372839
KWMTBOMO16231	KWMTBOMO15365	0.00295069833486203
KWMTBOMO14484	KWMTBOMO01001	0.00294022273072802
KWMTBOMO08022	KWMTBOMO01001	0.00293526233600609
KWMTBOMO14120	KWMTBOMO15365	0.00293447294261019
KWMTBOMO14151	KWMTBOMO15365	0.00292501647354497
KWMTBOMO14466	KWMTBOMO08464	0.00291402907186122
KWMTBOMO16127	KWMTBOMO01001	0.0029134878710745
KWMTBOMO14537	KWMTBOMO08464	0.00290738783715803
KWMTBOMO06092	KWMTBOMO08464	0.00290110987966909
KWMTBOMO06186	KWMTBOMO08464	0.00289953523129159
KWMTBOMO10839	KWMTBOMO08464	0.00287977720860075
KWMTBOMO12084	KWMTBOMO15365	0.00284899780951853
KWMTBOMO03283	KWMTBOMO01001	0.00284898493565197
KWMTBOMO01425	KWMTBOMO01001	0.00283660299931148
KWMTBOMO14587	KWMTBOMO08464	0.00280956522296901
KWMTBOMO01366	KWMTBOMO01001	0.00278795588206094
KWMTBOMO06130	KWMTBOMO08464	0.00277190235900639
KWMTBOMO10172	KWMTBOMO15365	0.00276701437986049
KWMTBOMO08361	KWMTBOMO01001	0.00276069287424435
KWMTBOMO10840	KWMTBOMO08464	0.0027455547454071
KWMTBOMO09006	KWMTBOMO08464	0.00273887415946019
KWMTBOMO14682	KWMTBOMO01001	0.00273845704782076
KWMTBOMO15713	KWMTBOMO15365	0.00270278574605363
KWMTBOMO10413	KWMTBOMO08464	0.00267581487295074
KWMTBOMO15178	KWMTBOMO01001	0.00266370163147314
KWMTBOMO13185	KWMTBOMO01001	0.00265715425502639
KWMTBOMO07507	KWMTBOMO08464	0.00265292369925639
KWMTBOMO15674	KWMTBOMO01001	0.00264426113143512
KWMTBOMO08005	KWMTBOMO15365	0.00263898421307719
KWMTBOMO01794	KWMTBOMO08464	0.00262643545660176
KWMTBOMO11664	KWMTBOMO08464	0.00262189842737981
KWMTBOMO14890	KWMTBOMO01001	0.00261339266762989
KWMTBOMO02272	KWMTBOMO08464	0.00260225704746529
KWMTBOMO04407	KWMTBOMO01001	0.00257948963947473
KWMTBOMO11087	KWMTBOMO01001	0.00257133395471345
KWMTBOMO04133	KWMTBOMO15365	0.00257113690705597
KWMTBOMO15377	KWMTBOMO08464	0.00257015243992643
KWMTBOMO05058	KWMTBOMO08464	0.00256948687744237
KWMTBOMO02474	KWMTBOMO08464	0.00256828772192523
KWMTBOMO14596	KWMTBOMO01001	0.00255682789801921
KWMTBOMO05232	KWMTBOMO15365	0.00255038801072145
KWMTBOMO02748	KWMTBOMO15365	0.00254656711216146
KWMTBOMO04591	KWMTBOMO15365	0.00254367656811144
KWMTBOMO16231	KWMTBOMO08464	0.00254137609091481
KWMTBOMO14466	KWMTBOMO01001	0.0025378694426796
KWMTBOMO15713	KWMTBOMO08464	0.00252031689233241
KWMTBOMO11294	KWMTBOMO08464	0.00251041446543718
KWMTBOMO13333	KWMTBOMO08464	0.00250435997847376
KWMTBOMO08770	KWMTBOMO15365	0.00248615362361928
KWMTBOMO13185	KWMTBOMO08464	0.00248205009963183
KWMTBOMO06195	KWMTBOMO08464	0.00247994493015897
KWMTBOMO15563	KWMTBOMO08464	0.00247355376220117
KWMTBOMO15603	KWMTBOMO08464	0.00245685147967956
KWMTBOMO02926	KWMTBOMO01001	0.00244708841021047
KWMTBOMO06092	KWMTBOMO01001	0.0024408661952862
KWMTBOMO16127	KWMTBOMO08464	0.00242229959717849
KWMTBOMO07252	KWMTBOMO01001	0.00241995880107576
KWMTBOMO07507	KWMTBOMO15365	0.0024168996086744
KWMTBOMO06202	KWMTBOMO15365	0.00241588083100283
KWMTBOMO02719	KWMTBOMO15365	0.00240657123754957
KWMTBOMO10990	KWMTBOMO01001	0.00240011639428047
KWMTBOMO12084	KWMTBOMO01001	0.00239762359933216
KWMTBOMO15603	KWMTBOMO01001	0.00239573737170789
KWMTBOMO14310	KWMTBOMO08464	0.00239060598057599
KWMTBOMO02719	KWMTBOMO01001	0.00238886938410775
KWMTBOMO10815	KWMTBOMO01001	0.00238720108855741
KWMTBOMO07403	KWMTBOMO15365	0.00238684094729034
KWMTBOMO15606	KWMTBOMO08464	0.00238283516734677
KWMTBOMO13733	KWMTBOMO08464	0.00237686718082246
KWMTBOMO05681	KWMTBOMO15365	0.00237430690236043
KWMTBOMO06205	KWMTBOMO08464	0.00237377089614173
KWMTBOMO06134	KWMTBOMO15365	0.00237256648868345
KWMTBOMO06071	KWMTBOMO08464	0.00236346032027257
KWMTBOMO10989	KWMTBOMO15365	0.00236268467479179
KWMTBOMO16231	KWMTBOMO01001	0.00236132352273374
KWMTBOMO14150	KWMTBOMO08464	0.00234767300419261
KWMTBOMO11744	KWMTBOMO08464	0.00230921569537735
KWMTBOMO05076	KWMTBOMO08464	0.00230436114807443
KWMTBOMO10839	KWMTBOMO01001	0.00228500740554262
KWMTBOMO01121	KWMTBOMO01001	0.00228048943625721
KWMTBOMO03777	KWMTBOMO15365	0.00227656825928103
KWMTBOMO08827	KWMTBOMO08464	0.00225959409675077
KWMTBOMO12906	KWMTBOMO15365	0.00224405079144303
KWMTBOMO05681	KWMTBOMO08464	0.00223099447165886
KWMTBOMO01425	KWMTBOMO08464	0.00223067185129725
KWMTBOMO15608	KWMTBOMO08464	0.00222923755415376
KWMTBOMO08866	KWMTBOMO01001	0.00221998045695414
KWMTBOMO13733	KWMTBOMO15365	0.00221490960197738
KWMTBOMO06920	KWMTBOMO08464	0.0022113070924217
KWMTBOMO08866	KWMTBOMO15365	0.00219949710634821
KWMTBOMO06713	KWMTBOMO15365	0.00219446131789263
KWMTBOMO10989	KWMTBOMO01001	0.0021726721019052
KWMTBOMO15606	KWMTBOMO15365	0.00216998500065333
KWMTBOMO01119	KWMTBOMO08464	0.00214806750527279
KWMTBOMO06128	KWMTBOMO08464	0.00212930044146832
KWMTBOMO10414	KWMTBOMO15365	0.00212715415999252
KWMTBOMO11732	KWMTBOMO08464	0.00210928577902227
KWMTBOMO05847	KWMTBOMO15365	0.00209817748945775
KWMTBOMO15188	KWMTBOMO15365	0.00208915631186084
KWMTBOMO05058	KWMTBOMO15365	0.00208436042378216
KWMTBOMO01956	KWMTBOMO08464	0.00207996844468009
KWMTBOMO06982	KWMTBOMO08464	0.00207152750261079
KWMTBOMO02834	KWMTBOMO08464	0.00206402436863987
KWMTBOMO16476	KWMTBOMO08464	0.00205692294739705
KWMTBOMO16482	KWMTBOMO01001	0.00204769826885828
KWMTBOMO08651	KWMTBOMO01001	0.00204361435470708
KWMTBOMO10429	KWMTBOMO08464	0.00203625090397623
KWMTBOMO06205	KWMTBOMO15365	0.00203155174900011
KWMTBOMO14578	KWMTBOMO01001	0.00202481516170425
KWMTBOMO12727	KWMTBOMO01001	0.00202255912211221
KWMTBOMO14537	KWMTBOMO15365	0.00201890148016038
KWMTBOMO04637	KWMTBOMO08464	0.0020176402966009
KWMTBOMO14838	KWMTBOMO08464	0.00201486688765024
KWMTBOMO01119	KWMTBOMO01001	0.00201338494540871
KWMTBOMO10429	KWMTBOMO01001	0.00200688849930208
KWMTBOMO15132	KWMTBOMO08464	0.00200438927414648
KWMTBOMO15188	KWMTBOMO01001	0.00199962572415344
KWMTBOMO15377	KWMTBOMO01001	0.00199205725761974
KWMTBOMO09826	KWMTBOMO08464	0.00198707025621928
KWMTBOMO11664	KWMTBOMO15365	0.00198593142178896
KWMTBOMO04675	KWMTBOMO01001	0.00197558465903911
KWMTBOMO00352	KWMTBOMO08464	0.00197175980579534
KWMTBOMO15609	KWMTBOMO15365	0.00197048130268108
KWMTBOMO14594	KWMTBOMO15365	0.00195588738710794
KWMTBOMO01366	KWMTBOMO08464	0.00195225592128088
KWMTBOMO00352	KWMTBOMO01001	0.00193733271746071
KWMTBOMO09534	KWMTBOMO15365	0.00193326198244636
KWMTBOMO08361	KWMTBOMO08464	0.00193301043354388
KWMTBOMO07825	KWMTBOMO01001	0.00192273661956702
KWMTBOMO02738	KWMTBOMO08464	0.00190415509863539
KWMTBOMO07077	KWMTBOMO08464	0.00190223702454788
KWMTBOMO06192	KWMTBOMO08464	0.00190100380671715
KWMTBOMO06089	KWMTBOMO01001	0.00189319538747548
KWMTBOMO13185	KWMTBOMO15365	0.00188963470558578
KWMTBOMO11568	KWMTBOMO08464	0.00188512464335517
KWMTBOMO06202	KWMTBOMO01001	0.00186151837220347
KWMTBOMO13733	KWMTBOMO01001	0.0018550901045462
KWMTBOMO10414	KWMTBOMO01001	0.00184389606965067
KWMTBOMO12727	KWMTBOMO15365	0.00183924853652293
KWMTBOMO01425	KWMTBOMO15365	0.00183881298466241
KWMTBOMO14572	KWMTBOMO15365	0.00182926392104547
KWMTBOMO07709	KWMTBOMO15365	0.00182831961396418
KWMTBOMO07709	KWMTBOMO01001	0.00181340380027478
KWMTBOMO05232	KWMTBOMO01001	0.00180830138246894
KWMTBOMO15319	KWMTBOMO08464	0.0018063923983451
KWMTBOMO04634	KWMTBOMO08464	0.00180411630249852
KWMTBOMO09450	KWMTBOMO08464	0.00179060853032799
KWMTBOMO00203	KWMTBOMO08464	0.00178771913937374
KWMTBOMO07397	KWMTBOMO01001	0.00178336865253733
KWMTBOMO06134	KWMTBOMO01001	0.00177595597890743
KWMTBOMO02277	KWMTBOMO01001	0.00177482046110705
KWMTBOMO15609	KWMTBOMO01001	0.00175832728976728
KWMTBOMO05671	KWMTBOMO15365	0.001751007546865
KWMTBOMO03418	KWMTBOMO01001	0.00174948450919374
KWMTBOMO07397	KWMTBOMO08464	0.00174860261953493
KWMTBOMO09534	KWMTBOMO01001	0.00174657619717076
KWMTBOMO09806	KWMTBOMO08464	0.0017241342868933
KWMTBOMO10989	KWMTBOMO08464	0.00172410815242774
KWMTBOMO08794	KWMTBOMO15365	0.00171259073930576
KWMTBOMO14232	KWMTBOMO01001	0.00170815269832873
KWMTBOMO14365	KWMTBOMO08464	0.00169689531326714
KWMTBOMO14225	KWMTBOMO08464	0.00169424570382617
KWMTBOMO14892	KWMTBOMO08464	0.00169324309811896
KWMTBOMO14578	KWMTBOMO15365	0.00168607887516065
KWMTBOMO11087	KWMTBOMO15365	0.00168245940203899
KWMTBOMO06968	KWMTBOMO01001	0.00167677254916115
KWMTBOMO15606	KWMTBOMO01001	0.001659559143966
KWMTBOMO04634	KWMTBOMO15365	0.0016338048111883
KWMTBOMO05767	KWMTBOMO01001	0.00162922199018724
KWMTBOMO15377	KWMTBOMO15365	0.00162849481772222
KWMTBOMO06128	KWMTBOMO15365	0.00162584308980448
KWMTBOMO04637	KWMTBOMO01001	0.00162520417456478
KWMTBOMO15713	KWMTBOMO01001	0.00159542460723633
KWMTBOMO06202	KWMTBOMO08464	0.0015948480136127
KWMTBOMO05847	KWMTBOMO01001	0.00159020127781481
KWMTBOMO14587	KWMTBOMO01001	0.0015860968705589
KWMTBOMO05671	KWMTBOMO01001	0.00155622668227941
KWMTBOMO11744	KWMTBOMO15365	0.00152795733476922
KWMTBOMO04483	KWMTBOMO15365	0.00152213722926635
KWMTBOMO10413	KWMTBOMO15365	0.00151415180879035
KWMTBOMO08603	KWMTBOMO08464	0.00151185052671286
KWMTBOMO14273	KWMTBOMO08464	0.00151157567470625
KWMTBOMO14448	KWMTBOMO01001	0.00148663261699468
KWMTBOMO03777	KWMTBOMO01001	0.00147761232421129
KWMTBOMO08827	KWMTBOMO15365	0.00147703806249551
KWMTBOMO11294	KWMTBOMO15365	0.00147614180419577
KWMTBOMO14310	KWMTBOMO01001	0.00146078958119778
KWMTBOMO10472	KWMTBOMO15365	0.00144642264286417
KWMTBOMO04507	KWMTBOMO15365	0.0014443256244685
KWMTBOMO15655	KWMTBOMO15365	0.00144060929165059
KWMTBOMO14579	KWMTBOMO08464	0.00143779251210638
KWMTBOMO11664	KWMTBOMO01001	0.00142920578884505
KWMTBOMO09534	KWMTBOMO08464	0.00142471533978366
KWMTBOMO01705	KWMTBOMO08464	0.00141976999968873
KWMTBOMO07506	KWMTBOMO15365	0.00141738791009345
KWMTBOMO06192	KWMTBOMO01001	0.00141557634784246
KWMTBOMO14232	KWMTBOMO15365	0.00141251518783789
KWMTBOMO07252	KWMTBOMO15365	0.00140087343094936
KWMTBOMO15619	KWMTBOMO08464	0.00139931112472105
KWMTBOMO10682	KWMTBOMO08464	0.00139270517393162
KWMTBOMO14151	KWMTBOMO01001	0.00139216994928335
KWMTBOMO15619	KWMTBOMO01001	0.00138520084737682
KWMTBOMO12525	KWMTBOMO15365	0.00138477813412679
KWMTBOMO05040	KWMTBOMO01001	0.0013781329534397
KWMTBOMO01705	KWMTBOMO15365	0.00137651609244015
KWMTBOMO08866	KWMTBOMO08464	0.00137594659681463
KWMTBOMO14310	KWMTBOMO15365	0.00136137355760325
KWMTBOMO09806	KWMTBOMO01001	0.00136067449232322
KWMTBOMO10990	KWMTBOMO08464	0.00135589988015784
KWMTBOMO01956	KWMTBOMO01001	0.00134324735826213
KWMTBOMO10777	KWMTBOMO15365	0.00133519828593307
KWMTBOMO03477	KWMTBOMO15365	0.00133254973860852
KWMTBOMO06196	KWMTBOMO08464	0.00132502473543263
KWMTBOMO09272	KWMTBOMO01001	0.00132203405831629
KWMTBOMO12727	KWMTBOMO08464	0.00131962347973068
KWMTBOMO06340	KWMTBOMO08464	0.00129355635379226
KWMTBOMO00051	KWMTBOMO08464	0.00128619840693769
KWMTBOMO14572	KWMTBOMO08464	0.00127724938313632
KWMTBOMO03288	KWMTBOMO15365	0.00127305091289255
KWMTBOMO05461	KWMTBOMO01001	0.00126695706211497
KWMTBOMO06276	KWMTBOMO01001	0.00125875709424371
KWMTBOMO03240	KWMTBOMO15365	0.00125466800656781
KWMTBOMO06130	KWMTBOMO15365	0.00124511019681833
KWMTBOMO04634	KWMTBOMO01001	0.00124252620174883
KWMTBOMO10413	KWMTBOMO01001	0.00124231130393178
KWMTBOMO10429	KWMTBOMO15365	0.00123381906382328
KWMTBOMO05767	KWMTBOMO15365	0.0012301149299206
KWMTBOMO14576	KWMTBOMO08464	0.00121788595107887
KWMTBOMO06128	KWMTBOMO01001	0.00121288554893345
KWMTBOMO01827	KWMTBOMO01001	0.00119691806717773
KWMTBOMO07403	KWMTBOMO08464	0.0011895988082197
KWMTBOMO10592	KWMTBOMO15365	0.00117615171271607
KWMTBOMO10214	KWMTBOMO01001	0.00116537371036247
KWMTBOMO04995	KWMTBOMO08464	0.00115828383410764
KWMTBOMO06982	KWMTBOMO15365	0.00115413725365943
KWMTBOMO15188	KWMTBOMO08464	0.00114988025413756
KWMTBOMO14448	KWMTBOMO15365	0.00114897860333175
KWMTBOMO03477	KWMTBOMO08464	0.00114521708573398
KWMTBOMO06340	KWMTBOMO01001	0.00114110033605255
KWMTBOMO10990	KWMTBOMO15365	0.00113339574238076
KWMTBOMO14023	KWMTBOMO01001	0.00113269833202411
KWMTBOMO08794	KWMTBOMO01001	0.00111850039330473
KWMTBOMO05767	KWMTBOMO08464	0.0011121506935217
KWMTBOMO02926	KWMTBOMO08464	0.00110597819717688
KWMTBOMO10839	KWMTBOMO15365	0.00110123921985108
KWMTBOMO15317	KWMTBOMO15365	0.00108912859032953
KWMTBOMO16482	KWMTBOMO15365	0.00108874236558368
KWMTBOMO01119	KWMTBOMO15365	0.00108639972253422
KWMTBOMO08827	KWMTBOMO01001	0.00108020645798649
KWMTBOMO08511	KWMTBOMO01001	0.00107751053419968
KWMTBOMO06089	KWMTBOMO08464	0.00106688839104291
KWMTBOMO05076	KWMTBOMO15365	0.00106185321997442
KWMTBOMO12662	KWMTBOMO01001	0.00104917736227289
KWMTBOMO15201	KWMTBOMO01001	0.00104502748488373
KWMTBOMO04507	KWMTBOMO01001	0.00104207936910891
KWMTBOMO14576	KWMTBOMO01001	0.00103723168465717
KWMTBOMO01705	KWMTBOMO01001	0.00103034807940532
KWMTBOMO08651	KWMTBOMO08464	0.0010231016157702
KWMTBOMO10682	KWMTBOMO15365	0.00102109860256061
KWMTBOMO15363	KWMTBOMO15365	0.00101682756473998
KWMTBOMO06196	KWMTBOMO01001	0.00101294761963635
KWMTBOMO10815	KWMTBOMO15365	0.00101013417873502
KWMTBOMO00051	KWMTBOMO15365	0.00100260149397098
KWMTBOMO12108	KWMTBOMO08464	0.000998563429312197
KWMTBOMO16482	KWMTBOMO08464	0.000987662020970814
KWMTBOMO08794	KWMTBOMO08464	0.000987550286580914
KWMTBOMO06821	KWMTBOMO08464	0.000985354938037716
KWMTBOMO06089	KWMTBOMO15365	0.000983833413691311
KWMTBOMO15609	KWMTBOMO08464	0.000962735379186636
KWMTBOMO16788	KWMTBOMO08464	0.000956932894395458
KWMTBOMO02277	KWMTBOMO15365	0.000952807535962151
KWMTBOMO14524	KWMTBOMO01001	0.000950632865464753
KWMTBOMO03240	KWMTBOMO01001	0.000950007322055194
KWMTBOMO02244	KWMTBOMO15365	0.000948530189401445
KWMTBOMO02050	KWMTBOMO08464	0.000946640731062795
KWMTBOMO03283	KWMTBOMO08464	0.000944741895473414
KWMTBOMO11747	KWMTBOMO15365	0.000940811913656322
KWMTBOMO14578	KWMTBOMO08464	0.000934647249420731
KWMTBOMO02926	KWMTBOMO15365	0.000931338610782757
KWMTBOMO01827	KWMTBOMO15365	0.000930566902606095
KWMTBOMO08651	KWMTBOMO15365	0.000922116619330429
KWMTBOMO01121	KWMTBOMO15365	0.000911699636884147
KWMTBOMO06924	KWMTBOMO01001	0.000910894193439363
KWMTBOMO02244	KWMTBOMO08464	0.00091041751215242
KWMTBOMO01412	KWMTBOMO08464	0.000899559089695758
KWMTBOMO03288	KWMTBOMO08464	0.000892692961409567
KWMTBOMO08022	KWMTBOMO15365	0.000886582847795834
KWMTBOMO11747	KWMTBOMO01001	0.000885585277823789
KWMTBOMO09450	KWMTBOMO15365	0.000863488429205034
KWMTBOMO10815	KWMTBOMO08464	0.000861580096588699
KWMTBOMO04675	KWMTBOMO08464	0.000856511590648254
KWMTBOMO15605	KWMTBOMO08464	0.000854030411484062
KWMTBOMO11744	KWMTBOMO01001	0.000850821306882546
KWMTBOMO15319	KWMTBOMO01001	0.000841539442281738
KWMTBOMO11841	KWMTBOMO01001	0.000835202458246446
KWMTBOMO06085	KWMTBOMO08464	0.000833993930155642
KWMTBOMO02272	KWMTBOMO15365	0.00082979744989433
KWMTBOMO13726	KWMTBOMO01001	0.000829725908931728
KWMTBOMO10004	KWMTBOMO08464	0.000828867935385975
KWMTBOMO00352	KWMTBOMO15365	0.00081969130794404
KWMTBOMO16788	KWMTBOMO01001	0.00081081422138061
KWMTBOMO12525	KWMTBOMO01001	0.000809101578365127
KWMTBOMO08022	KWMTBOMO08464	0.000807554038727425
KWMTBOMO05681	KWMTBOMO01001	0.000806946749233994
KWMTBOMO02473	KWMTBOMO08464	0.000804798646524098
KWMTBOMO08664	KWMTBOMO15365	0.000803337741690501
KWMTBOMO07709	KWMTBOMO08464	0.000786995416524871
KWMTBOMO12662	KWMTBOMO08464	0.00078668787670429
KWMTBOMO10214	KWMTBOMO15365	0.000785081587155231
KWMTBOMO06092	KWMTBOMO15365	0.000784388096085466
KWMTBOMO08179	KWMTBOMO01001	0.000784108973452293
KWMTBOMO15655	KWMTBOMO01001	0.000781712121032036
KWMTBOMO06195	KWMTBOMO15365	0.000781151354993707
KWMTBOMO13303	KWMTBOMO15365	0.000779278342659207
KWMTBOMO11841	KWMTBOMO08464	0.000770830341215458
KWMTBOMO00660	KWMTBOMO08464	0.000770815266139
KWMTBOMO09806	KWMTBOMO15365	0.000768624650085526
KWMTBOMO08696	KWMTBOMO01001	0.000764157950050349
KWMTBOMO05841	KWMTBOMO15365	0.000758689283468826
KWMTBOMO01412	KWMTBOMO01001	0.000746624689435288
KWMTBOMO12908	KWMTBOMO15365	0.00074072577430666
KWMTBOMO14890	KWMTBOMO15365	0.000737332855145104
KWMTBOMO14890	KWMTBOMO08464	0.000733862852000639
KWMTBOMO11747	KWMTBOMO08464	0.000731010612283965
KWMTBOMO15563	KWMTBOMO01001	0.000729467506447854
KWMTBOMO07505	KWMTBOMO01001	0.00072031084739537
KWMTBOMO09272	KWMTBOMO15365	0.000719154320088345
KWMTBOMO15605	KWMTBOMO15365	0.000711732848754236
KWMTBOMO14579	KWMTBOMO15365	0.000710358257913692
KWMTBOMO00203	KWMTBOMO15365	0.000707825646545004
KWMTBOMO06342	KWMTBOMO08464	0.00070693215141542
KWMTBOMO07505	KWMTBOMO08464	0.000697857978628851
KWMTBOMO10592	KWMTBOMO08464	0.000690569419560129
KWMTBOMO13303	KWMTBOMO01001	0.000689370580063279
KWMTBOMO13726	KWMTBOMO15365	0.000689291621213918
KWMTBOMO12077	KWMTBOMO08464	0.000688896120662009
KWMTBOMO12525	KWMTBOMO08464	0.000685800295539075
KWMTBOMO00051	KWMTBOMO01001	0.00067646233506462
KWMTBOMO12662	KWMTBOMO15365	0.000675736595013559
KWMTBOMO15563	KWMTBOMO15365	0.000674476989670206
KWMTBOMO14572	KWMTBOMO01001	0.000668162916190848
KWMTBOMO06134	KWMTBOMO08464	0.000663592118533255
KWMTBOMO14023	KWMTBOMO15365	0.000657710517078806
KWMTBOMO11841	KWMTBOMO15365	0.000654438863090609
KWMTBOMO09450	KWMTBOMO01001	0.000647189409198907
KWMTBOMO05841	KWMTBOMO08464	0.000640772792008184
KWMTBOMO00651	KWMTBOMO08464	0.000640661873987666
KWMTBOMO03477	KWMTBOMO01001	0.000635179297431048
KWMTBOMO11839	KWMTBOMO01001	0.000634270397150855
KWMTBOMO14892	KWMTBOMO15365	0.000630301318698788
KWMTBOMO14838	KWMTBOMO15365	0.000622013791546179
KWMTBOMO10004	KWMTBOMO15365	0.000621748067067583
KWMTBOMO14273	KWMTBOMO01001	0.000619726054954079
KWMTBOMO00651	KWMTBOMO01001	0.000611713549787288
KWMTBOMO05461	KWMTBOMO08464	0.00060698768924114
KWMTBOMO06192	KWMTBOMO15365	0.000600528021705165
KWMTBOMO06264	KWMTBOMO08464	0.000599402304742829
KWMTBOMO06342	KWMTBOMO15365	0.000598451687965622
KWMTBOMO12908	KWMTBOMO08464	0.000590714011537846
KWMTBOMO02738	KWMTBOMO15365	0.000590665865214252
KWMTBOMO00203	KWMTBOMO01001	0.000589851762657756
KWMTBOMO08696	KWMTBOMO08464	0.000584533544639934
KWMTBOMO12079	KWMTBOMO01001	0.000577373571295547
KWMTBOMO08603	KWMTBOMO01001	0.000570253446719659
KWMTBOMO03679	KWMTBOMO08464	0.000564590864549424
KWMTBOMO02474	KWMTBOMO01001	0.000562201838942693
KWMTBOMO08936	KWMTBOMO15365	0.000561101100913386
KWMTBOMO14445	KWMTBOMO15365	0.000558986217243576
KWMTBOMO14040	KWMTBOMO15365	0.000554200679518678
KWMTBOMO14594	KWMTBOMO01001	0.00054720651132002
KWMTBOMO08664	KWMTBOMO01001	0.000540338130703256
KWMTBOMO04995	KWMTBOMO15365	0.000538295258543687
KWMTBOMO06120	KWMTBOMO15365	0.000537394104970536
KWMTBOMO02016	KWMTBOMO01001	0.000534732626922753
KWMTBOMO14892	KWMTBOMO01001	0.000523813665276563
KWMTBOMO05040	KWMTBOMO08464	0.000520472418430926
KWMTBOMO06924	KWMTBOMO08464	0.000515274730107137
KWMTBOMO05461	KWMTBOMO15365	0.000506539506555467
KWMTBOMO16788	KWMTBOMO15365	0.000497846039535712
KWMTBOMO10840	KWMTBOMO15365	0.000497583253073026
KWMTBOMO14977	KWMTBOMO08464	0.000493049098260191
KWMTBOMO14869	KWMTBOMO15365	0.00048115279806353
KWMTBOMO11842	KWMTBOMO08464	0.000475946303471031
KWMTBOMO06276	KWMTBOMO08464	0.000470238730117623
KWMTBOMO07931	KWMTBOMO01001	0.000469468700812649
KWMTBOMO08766	KWMTBOMO08464	0.000458317430942918
KWMTBOMO14150	KWMTBOMO01001	0.000457902977652767
KWMTBOMO07931	KWMTBOMO08464	0.00045732763047898
KWMTBOMO10004	KWMTBOMO01001	0.000452460868239221
KWMTBOMO14449	KWMTBOMO15365	0.00045127576491132
KWMTBOMO12077	KWMTBOMO01001	0.000447602429747445
KWMTBOMO09006	KWMTBOMO15365	0.000445970545600274
KWMTBOMO14040	KWMTBOMO08464	0.000445869681146115
KWMTBOMO14594	KWMTBOMO08464	0.00044539489634022
KWMTBOMO08511	KWMTBOMO08464	0.000444353906856425
KWMTBOMO11839	KWMTBOMO15365	0.000443826411911587
KWMTBOMO06264	KWMTBOMO15365	0.000441292380134533
KWMTBOMO10840	KWMTBOMO01001	0.000436640456142818
KWMTBOMO06085	KWMTBOMO15365	0.000435744960395482
KWMTBOMO11842	KWMTBOMO15365	0.000432661930278112
KWMTBOMO01827	KWMTBOMO08464	0.000429365901994726
KWMTBOMO05040	KWMTBOMO15365	0.000424672395125641
KWMTBOMO09472	KWMTBOMO15365	0.000422122976627081
KWMTBOMO02244	KWMTBOMO01001	0.000414198398575985
KWMTBOMO08936	KWMTBOMO01001	0.00041312625627495
KWMTBOMO06264	KWMTBOMO01001	0.000410856216716907
KWMTBOMO15319	KWMTBOMO15365	0.000409702594998856
KWMTBOMO00651	KWMTBOMO15365	0.000409626026642682
KWMTBOMO14576	KWMTBOMO15365	0.000408661037016983
KWMTBOMO14977	KWMTBOMO15365	0.000407397949354183
KWMTBOMO14579	KWMTBOMO01001	0.00040476923927349
KWMTBOMO14604	KWMTBOMO08464	0.00040181181618149
KWMTBOMO07505	KWMTBOMO15365	0.000395094266117092
KWMTBOMO15619	KWMTBOMO15365	0.000392093676220126
KWMTBOMO10777	KWMTBOMO01001	0.00039043407826813
KWMTBOMO14869	KWMTBOMO08464	0.000385253103579419
KWMTBOMO04483	KWMTBOMO08464	0.0003837782112503
KWMTBOMO08936	KWMTBOMO08464	0.000382888068302359
KWMTBOMO15605	KWMTBOMO01001	0.000376455085028177
KWMTBOMO06342	KWMTBOMO01001	0.000373352359186971
KWMTBOMO06821	KWMTBOMO15365	0.00036212871986505
KWMTBOMO12908	KWMTBOMO01001	0.000359948422209202
KWMTBOMO06250	KWMTBOMO15365	0.000356510175428759
KWMTBOMO07077	KWMTBOMO15365	0.000353615924555738
KWMTBOMO03679	KWMTBOMO01001	0.00035308598323471
KWMTBOMO14586	KWMTBOMO08464	0.000347262420922393
KWMTBOMO13054	KWMTBOMO15365	0.000342793909531343
KWMTBOMO08179	KWMTBOMO15365	0.000340864564598719
KWMTBOMO08795	KWMTBOMO15365	0.000340509581064647
KWMTBOMO14445	KWMTBOMO08464	0.000337822395975389
KWMTBOMO06201	KWMTBOMO15365	0.000337084379057872
KWMTBOMO12077	KWMTBOMO15365	0.000335966293944706
KWMTBOMO13054	KWMTBOMO08464	0.000335889346403989
KWMTBOMO06186	KWMTBOMO01001	0.000333878908242959
KWMTBOMO06250	KWMTBOMO08464	0.000331113859314796
KWMTBOMO16070	KWMTBOMO08464	0.000330595206097104
KWMTBOMO01412	KWMTBOMO15365	0.00032758657594804
KWMTBOMO16476	KWMTBOMO01001	0.000326936342763616
KWMTBOMO14445	KWMTBOMO01001	0.000326056389896654
KWMTBOMO06195	KWMTBOMO01001	0.000324768898738958
KWMTBOMO07077	KWMTBOMO01001	0.000324547426871864
KWMTBOMO04637	KWMTBOMO15365	0.000322345584057344
KWMTBOMO14977	KWMTBOMO01001	0.000318992328901164
KWMTBOMO14449	KWMTBOMO08464	0.000318862731426497
KWMTBOMO14869	KWMTBOMO01001	0.000314670747024362
KWMTBOMO08795	KWMTBOMO01001	0.000312605719858479
KWMTBOMO02016	KWMTBOMO15365	0.000311073731602255
KWMTBOMO03679	KWMTBOMO15365	0.000307953548646314
KWMTBOMO09472	KWMTBOMO08464	0.000299180477749446
KWMTBOMO08696	KWMTBOMO15365	0.000290330933293551
KWMTBOMO14150	KWMTBOMO15365	0.000290163671864019
KWMTBOMO06120	KWMTBOMO01001	0.000289128517985808
KWMTBOMO14524	KWMTBOMO15365	0.000283491242692842
KWMTBOMO14365	KWMTBOMO15365	0.000281839058470699
KWMTBOMO07825	KWMTBOMO15365	0.000281463671468671
KWMTBOMO12079	KWMTBOMO15365	0.000280707176622118
KWMTBOMO15317	KWMTBOMO08464	0.00028033374095021
KWMTBOMO06276	KWMTBOMO15365	0.000279063211051295
KWMTBOMO12020	KWMTBOMO08464	0.000276354567358314
KWMTBOMO09296	KWMTBOMO08464	0.000276229543067162
KWMTBOMO04908	KWMTBOMO01001	0.000270502850248246
KWMTBOMO08511	KWMTBOMO15365	0.000270023482699021
KWMTBOMO06201	KWMTBOMO08464	0.00026538284785575
KWMTBOMO14365	KWMTBOMO01001	0.000256436493731068
KWMTBOMO08403	KWMTBOMO08464	0.000253624038749155
KWMTBOMO07048	KWMTBOMO01001	0.000252082336276282
KWMTBOMO08179	KWMTBOMO08464	0.000250967928096286
KWMTBOMO09826	KWMTBOMO15365	0.000250387633159361
KWMTBOMO06250	KWMTBOMO01001	0.000242974766524539
KWMTBOMO08766	KWMTBOMO15365	0.000242896986627002
KWMTBOMO16476	KWMTBOMO15365	0.000241122022407813
KWMTBOMO06196	KWMTBOMO15365	0.000237519276925145
KWMTBOMO02473	KWMTBOMO01001	0.000236653248426239
KWMTBOMO07931	KWMTBOMO15365	0.000230452887521883
KWMTBOMO14586	KWMTBOMO01001	0.000227944546623966
KWMTBOMO15132	KWMTBOMO15365	0.000224009428742705
KWMTBOMO02473	KWMTBOMO15365	0.000222099399100319
KWMTBOMO13303	KWMTBOMO08464	0.000221692145913221
KWMTBOMO08403	KWMTBOMO01001	0.000221184503251961
KWMTBOMO09272	KWMTBOMO08464	0.000215873466737209
KWMTBOMO02474	KWMTBOMO15365	0.000215230743784475
KWMTBOMO16070	KWMTBOMO01001	0.000207955115674748
KWMTBOMO04483	KWMTBOMO01001	0.000199242090795644
KWMTBOMO05086	KWMTBOMO01001	0.000194433228170277
KWMTBOMO00660	KWMTBOMO01001	0.000193423877314203
KWMTBOMO12020	KWMTBOMO01001	0.00019241402111687
KWMTBOMO13726	KWMTBOMO08464	0.000190482142131688
KWMTBOMO07825	KWMTBOMO08464	0.000190137380661613
KWMTBOMO04908	KWMTBOMO15365	0.000185295063916526
KWMTBOMO06883	KWMTBOMO01001	0.000181455991441053
KWMTBOMO14273	KWMTBOMO15365	0.000177682754018035
KWMTBOMO06340	KWMTBOMO15365	0.000171052441652391
KWMTBOMO09472	KWMTBOMO01001	0.000163851247150506
KWMTBOMO14604	KWMTBOMO15365	0.00016156941609208
KWMTBOMO05841	KWMTBOMO01001	0.000161275301641391
KWMTBOMO12108	KWMTBOMO15365	0.000147323595297297
KWMTBOMO09296	KWMTBOMO01001	0.00014722186242655
KWMTBOMO14524	KWMTBOMO08464	0.000144379035268373
KWMTBOMO14604	KWMTBOMO01001	0.000142158832900359
KWMTBOMO04995	KWMTBOMO01001	0.00014183644922709
KWMTBOMO02016	KWMTBOMO08464	0.000141488965452184
KWMTBOMO10777	KWMTBOMO08464	0.000135703175165498
KWMTBOMO12020	KWMTBOMO15365	0.000128374617924364
KWMTBOMO03284	KWMTBOMO15365	0.000127908728511207
KWMTBOMO14586	KWMTBOMO15365	0.000126537538325612
KWMTBOMO16068	KWMTBOMO01001	0.00012613142728166
KWMTBOMO06186	KWMTBOMO15365	0.000124161103176291
KWMTBOMO14040	KWMTBOMO01001	0.000121295616978056
KWMTBOMO06883	KWMTBOMO15365	0.000107923360455215
KWMTBOMO06883	KWMTBOMO08464	0.000106339852080647
KWMTBOMO15201	KWMTBOMO08464	0.000104917302070592
