# Supplementary material for: A silkworm model reveals coordinated cellular communities and conserved Hippo regulation in silk production
Source: Research Square preprint supplement (doi:10.21203/rs.3.rs-7747598/v1), 2025-10-01
Supplement: Supplementary file 17 [file Supplementary Data 12.xlsx]

## Sheet: main
Supplementary Data 12. DEGs identified in PSGs from L5D3 YkiOE, L5D6 YkiOE, and L5D6 YkiKO larvae and the TPM expression of genes related to SG development and silk protein synthesis in each sample.
1	DEGs in L5D3 YkiOE
2	DEGs in L5D6 YkiOE
3	DEGs in L5D6 YkiKO
4	TPM expression of genes related SG development and silk protein synthesis in each sample

## Sheet: 1-L5D3 Yki overexpressing
	gene_name	logFC	AveExpr	t	P.Value	adj.P.Val	B	Compare	Sign_group	NCBI_id
1	KWMTBOMO00001	-0.113	0.163	-1.723	1.54e-01	4.81e-01	-6.16	L5D3_OR_VS_L5D3_Ctr	noSig	LOC101740329
2	KWMTBOMO00002	0	0	0	1.00e+00	1.00e+00	-7.548	L5D3_OR_VS_L5D3_Ctr	noSig	NA
3	KWMTBOMO00003	-0.023	0.035	-0.912	4.09e-01	7.51e-01	-7.082	L5D3_OR_VS_L5D3_Ctr	noSig	LOC101741181
4	KWMTBOMO00004	-0.49	3.641	-1.997	1.10e-01	3.91e-01	-5.812	L5D3_OR_VS_L5D3_Ctr	noSig	LOC101739479
5	KWMTBOMO00005	-0.502	3.216	-1.765	1.46e-01	4.65e-01	-6.108	L5D3_OR_VS_L5D3_Ctr	noSig	NA
6	KWMTBOMO00006	-0.291	3.627	-1.532	1.94e-01	5.51e-01	-6.397	L5D3_OR_VS_L5D3_Ctr	noSig	LOC101741407
7	KWMTBOMO00007	-0.425	1.218	-1.885	1.26e-01	4.26e-01	-5.955	L5D3_OR_VS_L5D3_Ctr	noSig	LOC101739615
8	KWMTBOMO00008	0.108	0.392	1.561	1.87e-01	5.39e-01	-6.362	L5D3_OR_VS_L5D3_Ctr	noSig	NA
9	KWMTBOMO00009	0	0	0	1.00e+00	1.00e+00	-7.548	L5D3_OR_VS_L5D3_Ctr	noSig	NA
10	KWMTBOMO00010	-0.064	0.061	-2.671	5.06e-02	2.47e-01	-4.958	L5D3_OR_VS_L5D3_Ctr	noSig	NA
11	KWMTBOMO00011	0.01	0.005	1.032	3.55e-01	6.90e-01	-6.964	L5D3_OR_VS_L5D3_Ctr	noSig	LOC101741740
12	KWMTBOMO00012	0	0	0	1.00e+00	1.00e+00	-7.548	L5D3_OR_VS_L5D3_Ctr	noSig	NA
13	KWMTBOMO00013	0	0	0	1.00e+00	1.00e+00	-7.548	L5D3_OR_VS_L5D3_Ctr	noSig	NA
14	KWMTBOMO00014	-1.41	1.03	-6.982	1.56e-03	3.33e-02	-0.908	L5D3_OR_VS_L5D3_Ctr	down	NA
15	KWMTBOMO00015	-0.168	0.084	-2.353	7.25e-02	3.09e-01	-5.358	L5D3_OR_VS_L5D3_Ctr	noSig	LOC101739758
16	KWMTBOMO00016	-0.442	1.219	-0.67	5.37e-01	8.94e-01	-7.286	L5D3_OR_VS_L5D3_Ctr	noSig	NA
17	KWMTBOMO00017	0	0	0	1.00e+00	1.00e+00	-7.548	L5D3_OR_VS_L5D3_Ctr	noSig	LOC101741886
18	KWMTBOMO00018	0.019	0.009	1.044	3.51e-01	6.90e-01	-6.952	L5D3_OR_VS_L5D3_Ctr	noSig	LOC101742177
19	KWMTBOMO00019	-0.074	0.123	-0.53	6.22e-01	9.83e-01	-7.381	L5D3_OR_VS_L5D3_Ctr	noSig	tan
20	KWMTBOMO00020	-0.47	7.2	-5.628	3.70e-03	5.09e-02	-1.925	L5D3_OR_VS_L5D3_Ctr	noSig	LOC101742318
21	KWMTBOMO00021	-0.438	4.181	-3.431	2.29e-02	1.48e-01	-4.055	L5D3_OR_VS_L5D3_Ctr	noSig	LOC732936
22	KWMTBOMO00022	-0.914	1.58	-3.695	1.78e-02	1.27e-01	-3.761	L5D3_OR_VS_L5D3_Ctr	noSig	LOC101742469
23	KWMTBOMO00023	-1.124	2.284	-3.148	3.04e-02	1.77e-01	-4.381	L5D3_OR_VS_L5D3_Ctr	noSig	LOC101740028
24	KWMTBOMO00024	-0.372	0.98	-1.484	2.06e-01	5.72e-01	-6.456	L5D3_OR_VS_L5D3_Ctr	noSig	LOC101740159
25	KWMTBOMO00025	0	0	0	1.00e+00	1.00e+00	-7.548	L5D3_OR_VS_L5D3_Ctr	noSig	LOC101742610
26	KWMTBOMO00026	0	0	0	1.00e+00	1.00e+00	-7.548	L5D3_OR_VS_L5D3_Ctr	noSig	LOC101742756
27	KWMTBOMO00027	0	0	0	1.00e+00	1.00e+00	-7.548	L5D3_OR_VS_L5D3_Ctr	noSig	LOC101740430
28	KWMTBOMO00028	0	0	0	1.00e+00	1.00e+00	-7.548	L5D3_OR_VS_L5D3_Ctr	noSig	LOC101743052
29	KWMTBOMO00029	0	0	0	1.00e+00	1.00e+00	-7.548	L5D3_OR_VS_L5D3_Ctr	noSig	LOC101742910
30	KWMTBOMO00030	0	0	0	1.00e+00	1.00e+00	-7.548	L5D3_OR_VS_L5D3_Ctr	noSig	NA
31	KWMTBOMO00031	-0.012	0.295	-0.067	9.49e-01	1.00e+00	-7.545	L5D3_OR_VS_L5D3_Ctr	noSig	LOC101740565
32	KWMTBOMO00032	0	0	0	1.00e+00	1.00e+00	-7.548	L5D3_OR_VS_L5D3_Ctr	noSig	NA
33	KWMTBOMO00033	0	0	0	1.00e+00	1.00e+00	-7.548	L5D3_OR_VS_L5D3_Ctr	noSig	LOC101743283
34	KWMTBOMO00034	0	0	0	1.00e+00	1.00e+00	-7.548	L5D3_OR_VS_L5D3_Ctr	noSig	NA
35	KWMTBOMO00035	0.01	0.005	1.032	3.55e-01	6.90e-01	-6.964	L5D3_OR_VS_L5D3_Ctr	noSig	LOC101739644
36	KWMTBOMO00036	0	0	0	1.00e+00	1.00e+00	-7.548	L5D3_OR_VS_L5D3_Ctr	noSig	LOC101740839
37	KWMTBOMO00037	0	0	0	1.00e+00	1.00e+00	-7.548	L5D3_OR_VS_L5D3_Ctr	noSig	LOC101743424
38	KWMTBOMO00038	-0.028	0.028	-1.042	3.51e-01	6.90e-01	-6.954	L5D3_OR_VS_L5D3_Ctr	noSig	NA
39	KWMTBOMO00039	0.08	0.04	1.047	3.49e-01	6.90e-01	-6.948	L5D3_OR_VS_L5D3_Ctr	noSig	LOC101743564
40	KWMTBOMO00040	-0.267	0.208	-2.276	7.93e-02	3.28e-01	-5.456	L5D3_OR_VS_L5D3_Ctr	noSig	LOC101741126
41	KWMTBOMO00041	-0.086	0.193	-0.598	5.79e-01	9.39e-01	-7.337	L5D3_OR_VS_L5D3_Ctr	noSig	NA
42	KWMTBOMO00042	0	0	0	1.00e+00	1.00e+00	-7.548	L5D3_OR_VS_L5D3_Ctr	noSig	LOC101743705
43	KWMTBOMO00043	-0.19	0.704	-0.545	6.12e-01	9.74e-01	-7.372	L5D3_OR_VS_L5D3_Ctr	noSig	NA
44	KWMTBOMO00044	-0.371	0.646	-1.521	1.97e-01	5.56e-01	-6.411	L5D3_OR_VS_L5D3_Ctr	noSig	LOC101743858
45	KWMTBOMO00045	-0.145	0.862	-0.317	7.66e-01	1.00e+00	-7.487	L5D3_OR_VS_L5D3_Ctr	noSig	LOC101744149
46	KWMTBOMO00046	-1.013	0.939	-3.838	1.55e-02	1.16e-01	-3.607	L5D3_OR_VS_L5D3_Ctr	noSig	NA
47	KWMTBOMO00047	-0.61	3.526	-1.541	1.92e-01	5.47e-01	-6.387	L5D3_OR_VS_L5D3_Ctr	noSig	LOC101744289
48	KWMTBOMO00048	-0.1	0.074	-2.89	3.99e-02	2.11e-01	-4.69	L5D3_OR_VS_L5D3_Ctr	noSig	NA
49	KWMTBOMO00049	0	0	0	1.00e+00	1.00e+00	-7.548	L5D3_OR_VS_L5D3_Ctr	noSig	NA
50	KWMTBOMO00050	-0.133	0.099	-0.825	4.52e-01	8.01e-01	-7.16	L5D3_OR_VS_L5D3_Ctr	noSig	LOC101741268
51	KWMTBOMO00051	-1.004	2.734	-5.023	5.75e-03	6.47e-02	-2.444	L5D3_OR_VS_L5D3_Ctr	noSig	LOC101744433
52	KWMTBOMO00052	0.26	1.686	0.97	3.82e-01	7.18e-01	-7.026	L5D3_OR_VS_L5D3_Ctr	noSig	LOC101744817
53	KWMTBOMO00053	0	0	0	1.00e+00	1.00e+00	-7.548	L5D3_OR_VS_L5D3_Ctr	noSig	L130
54	KWMTBOMO00054	0	0	0	1.00e+00	1.00e+00	-7.548	L5D3_OR_VS_L5D3_Ctr	noSig	NA
55	KWMTBOMO00055	0	0	0	1.00e+00	1.00e+00	-7.548	L5D3_OR_VS_L5D3_Ctr	noSig	LOC101741548
56	KWMTBOMO00056	-0.033	0.016	-1.046	3.50e-01	6.90e-01	-6.95	L5D3_OR_VS_L5D3_Ctr	noSig	LOC101741691
57	KWMTBOMO00057	-0.253	3.34	-0.78	4.75e-01	8.27e-01	-7.199	L5D3_OR_VS_L5D3_Ctr	noSig	LOC101736132
58	KWMTBOMO00058	-0.136	0.147	-1.33	2.48e-01	6.43e-01	-6.638	L5D3_OR_VS_L5D3_Ctr	noSig	NA
59	KWMTBOMO00059	-0.255	1.427	-2.069	1.01e-01	3.73e-01	-5.72	L5D3_OR_VS_L5D3_Ctr	noSig	Bmptp-Z
60	KWMTBOMO00060	-0.719	2.667	-5.075	5.53e-03	6.36e-02	-2.398	L5D3_OR_VS_L5D3_Ctr	noSig	LOC105842517
61	KWMTBOMO00061	-0.365	0.677	-1.602	1.78e-01	5.27e-01	-6.312	L5D3_OR_VS_L5D3_Ctr	noSig	LOC101741988
62	KWMTBOMO00062	0	0	0	1.00e+00	1.00e+00	-7.548	L5D3_OR_VS_L5D3_Ctr	noSig	NA
63	KWMTBOMO00063	0.098	0.982	0.51	6.35e-01	9.96e-01	-7.393	L5D3_OR_VS_L5D3_Ctr	noSig	NA
64	KWMTBOMO00064	-0.026	1.479	-0.1	9.25e-01	1.00e+00	-7.542	L5D3_OR_VS_L5D3_Ctr	noSig	LOC101745111
65	KWMTBOMO00065	-0.13	1.189	-0.7	5.19e-01	8.74e-01	-7.263	L5D3_OR_VS_L5D3_Ctr	noSig	LOC101745262
66	KWMTBOMO00066	-0.628	1.579	-1.701	1.58e-01	4.89e-01	-6.188	L5D3_OR_VS_L5D3_Ctr	noSig	LOC110386353
67	KWMTBOMO00067	-0.261	3.826	-0.751	4.91e-01	8.44e-01	-7.223	L5D3_OR_VS_L5D3_Ctr	noSig	LOC101745405
68	KWMTBOMO00068	-1.727	5.319	-15.777	4.93e-05	9.42e-03	2.994	L5D3_OR_VS_L5D3_Ctr	down	BLOS2
69	KWMTBOMO00069	-0.009	0.014	-0.462	6.66e-01	1.00e+00	-7.42	L5D3_OR_VS_L5D3_Ctr	noSig	LOC101742128
70	KWMTBOMO00070	-0.028	0.014	-1.046	3.50e-01	6.90e-01	-6.95	L5D3_OR_VS_L5D3_Ctr	noSig	LOC101742648
71	KWMTBOMO00071	-0.102	0.105	-0.761	4.86e-01	8.39e-01	-7.215	L5D3_OR_VS_L5D3_Ctr	noSig	NA
72	KWMTBOMO00072	-0.212	0.167	-4.851	6.57e-03	7.00e-02	-2.601	L5D3_OR_VS_L5D3_Ctr	noSig	NA
73	KWMTBOMO00073	-0.019	0.009	-1.044	3.51e-01	6.90e-01	-6.952	L5D3_OR_VS_L5D3_Ctr	noSig	LOC105842242
74	KWMTBOMO00074	0	0.056	0	1.00e+00	1.00e+00	-7.548	L5D3_OR_VS_L5D3_Ctr	noSig	NA
75	KWMTBOMO00075	-0.09	0.147	-2.226	8.40e-02	3.40e-01	-5.52	L5D3_OR_VS_L5D3_Ctr	noSig	NA
76	KWMTBOMO00076	0	0	0	1.00e+00	1.00e+00	-7.548	L5D3_OR_VS_L5D3_Ctr	noSig	LOC101745545
77	KWMTBOMO00077	0.005	0.002	0.991	3.73e-01	7.05e-01	-7.006	L5D3_OR_VS_L5D3_Ctr	noSig	LOC101742420
78	KWMTBOMO00078	0	0	0	1.00e+00	1.00e+00	-7.548	L5D3_OR_VS_L5D3_Ctr	noSig	NA
79	KWMTBOMO00079	-0.503	1.628	-1.594	1.80e-01	5.28e-01	-6.321	L5D3_OR_VS_L5D3_Ctr	noSig	LOC101745928
80	KWMTBOMO00080	0.215	1.086	1.126	3.18e-01	6.90e-01	-6.866	L5D3_OR_VS_L5D3_Ctr	noSig	LOC101742566
81	KWMTBOMO00081	-0.093	1.727	-0.412	7.00e-01	1.00e+00	-7.446	L5D3_OR_VS_L5D3_Ctr	noSig	LOC101746314
82	KWMTBOMO00082	0.199	0.415	1.294	2.60e-01	6.62e-01	-6.68	L5D3_OR_VS_L5D3_Ctr	noSig	LOC101735720
83	KWMTBOMO00083	-0.987	1.499	-3.071	3.29e-02	1.86e-01	-4.473	L5D3_OR_VS_L5D3_Ctr	noSig	NA
84	KWMTBOMO00084	-0.49	0.656	-4.268	1.06e-02	9.23e-02	-3.161	L5D3_OR_VS_L5D3_Ctr	noSig	NA
85	KWMTBOMO00085	-0.186	0.748	-1.006	3.67e-01	7.04e-01	-6.99	L5D3_OR_VS_L5D3_Ctr	noSig	LOC101746452
86	KWMTBOMO00086	-0.155	0.228	-1.467	2.10e-01	5.79e-01	-6.476	L5D3_OR_VS_L5D3_Ctr	noSig	LOC101746594
87	KWMTBOMO00087	0	0	0	1.00e+00	1.00e+00	-7.548	L5D3_OR_VS_L5D3_Ctr	noSig	NA
88	KWMTBOMO00088	0	0	0	1.00e+00	1.00e+00	-7.548	L5D3_OR_VS_L5D3_Ctr	noSig	LOC101746820
89	KWMTBOMO00089	0.198	1.122	0.894	4.18e-01	7.60e-01	-7.098	L5D3_OR_VS_L5D3_Ctr	noSig	LOC101742707
90	KWMTBOMO00090	0.025	0.345	0.335	7.53e-01	1.00e+00	-7.48	L5D3_OR_VS_L5D3_Ctr	noSig	LOC101742856
91	KWMTBOMO00091	0.019	0.038	1.161	3.05e-01	6.90e-01	-6.828	L5D3_OR_VS_L5D3_Ctr	noSig	LOC101742998
92	KWMTBOMO00092	-0.041	0.021	-1.047	3.49e-01	6.90e-01	-6.949	L5D3_OR_VS_L5D3_Ctr	noSig	LOC101739801
93	KWMTBOMO00093	0	0	0	1.00e+00	1.00e+00	-7.548	L5D3_OR_VS_L5D3_Ctr	noSig	NA
94	KWMTBOMO00094	0	0.187	-0.007	9.95e-01	1.00e+00	-7.548	L5D3_OR_VS_L5D3_Ctr	noSig	LOC101746961
95	KWMTBOMO00095	-0.154	0.144	-2.029	1.06e-01	3.84e-01	-5.772	L5D3_OR_VS_L5D3_Ctr	noSig	NA
96	KWMTBOMO00096	0	0	0	1.00e+00	1.00e+00	-7.548	L5D3_OR_VS_L5D3_Ctr	noSig	LOC100750224
97	KWMTBOMO00097	-0.743	4.316	-6.08	2.72e-03	4.37e-02	-1.564	L5D3_OR_VS_L5D3_Ctr	down	LOC101735670
98	KWMTBOMO00098	-0.242	3.329	-1.061	3.43e-01	6.90e-01	-6.934	L5D3_OR_VS_L5D3_Ctr	noSig	LOC101735897
99	KWMTBOMO00099	0.062	1.999	0.419	6.95e-01	1.00e+00	-7.442	L5D3_OR_VS_L5D3_Ctr	noSig	LOC101736024
100	KWMTBOMO00100	-0.067	0.095	-2.29	7.79e-02	3.24e-01	-5.438	L5D3_OR_VS_L5D3_Ctr	noSig	LOC101743284
101	KWMTBOMO00101	-0.064	0.065	-5.464	4.15e-03	5.36e-02	-2.061	L5D3_OR_VS_L5D3_Ctr	noSig	NA
102	KWMTBOMO00102	0.06	0.387	0.771	4.80e-01	8.33e-01	-7.206	L5D3_OR_VS_L5D3_Ctr	noSig	LOC101743425
103	KWMTBOMO00103	-0.252	0.126	-1.768	1.45e-01	4.64e-01	-6.104	L5D3_OR_VS_L5D3_Ctr	noSig	LOC101736161
104	KWMTBOMO00104	-0.871	2.423	-3.808	1.60e-02	1.18e-01	-3.639	L5D3_OR_VS_L5D3_Ctr	noSig	LOC101736377
105	KWMTBOMO00105	-0.193	1.885	-1.445	2.16e-01	5.87e-01	-6.502	L5D3_OR_VS_L5D3_Ctr	noSig	LOC101736593
106	KWMTBOMO00106	0.049	5.101	0.105	9.21e-01	1.00e+00	-7.541	L5D3_OR_VS_L5D3_Ctr	noSig	LOC101736825
107	KWMTBOMO00107	-0.143	0.186	-1.53	1.95e-01	5.52e-01	-6.4	L5D3_OR_VS_L5D3_Ctr	noSig	NA
108	KWMTBOMO00108	0.361	5.037	0.788	4.71e-01	8.22e-01	-7.192	L5D3_OR_VS_L5D3_Ctr	noSig	NA
109	KWMTBOMO00109	-0.03	0.942	-0.126	9.05e-01	1.00e+00	-7.538	L5D3_OR_VS_L5D3_Ctr	noSig	LOC101743706
110	KWMTBOMO00110	0	0	0	1.00e+00	1.00e+00	-7.548	L5D3_OR_VS_L5D3_Ctr	noSig	LOC101737036
111	KWMTBOMO00111	0.048	0.047	0.668	5.38e-01	8.95e-01	-7.288	L5D3_OR_VS_L5D3_Ctr	noSig	Bmap-A
112	KWMTBOMO00112	0	0	0	1.00e+00	1.00e+00	-7.548	L5D3_OR_VS_L5D3_Ctr	noSig	ap
113	KWMTBOMO00113	0	0	0	1.00e+00	1.00e+00	-7.548	L5D3_OR_VS_L5D3_Ctr	noSig	LOC105842502
114	KWMTBOMO00114	-0.033	0.03	-1.076	3.37e-01	6.90e-01	-6.918	L5D3_OR_VS_L5D3_Ctr	noSig	NA
115	KWMTBOMO00115	0	0	0	1.00e+00	1.00e+00	-7.548	L5D3_OR_VS_L5D3_Ctr	noSig	NA
116	KWMTBOMO00116	0.042	0.04	1.598	1.79e-01	5.28e-01	-6.316	L5D3_OR_VS_L5D3_Ctr	noSig	NA
117	KWMTBOMO00117	-0.019	0.133	-0.171	8.72e-01	1.00e+00	-7.53	L5D3_OR_VS_L5D3_Ctr	noSig	NA
118	KWMTBOMO00118	0	0	0	1.00e+00	1.00e+00	-7.548	L5D3_OR_VS_L5D3_Ctr	noSig	LOC101744290
119	KWMTBOMO00119	0	0	0	1.00e+00	1.00e+00	-7.548	L5D3_OR_VS_L5D3_Ctr	noSig	LOC101744434
120	KWMTBOMO00120	-0.094	0.16	-0.612	5.71e-01	9.29e-01	-7.328	L5D3_OR_VS_L5D3_Ctr	noSig	LOC101744584
121	KWMTBOMO00121	0	0	0	1.00e+00	1.00e+00	-7.548	L5D3_OR_VS_L5D3_Ctr	noSig	LOC101737320
122	KWMTBOMO00122	0.171	1.964	2.023	1.07e-01	3.85e-01	-5.78	L5D3_OR_VS_L5D3_Ctr	noSig	LOC101737462
123	KWMTBOMO00123	-0.014	0.03	-0.411	7.01e-01	1.00e+00	-7.446	L5D3_OR_VS_L5D3_Ctr	noSig	LOC101737605
124	KWMTBOMO00124	-0.682	4.016	-3.2	2.88e-02	1.71e-01	-4.32	L5D3_OR_VS_L5D3_Ctr	noSig	LOC101744726
125	KWMTBOMO00125	0	0	0	1.00e+00	1.00e+00	-7.548	L5D3_OR_VS_L5D3_Ctr	noSig	NA
126	KWMTBOMO00126	0	0	0	1.00e+00	1.00e+00	-7.548	L5D3_OR_VS_L5D3_Ctr	noSig	Mtnr
127	KWMTBOMO00127	-0.068	0.378	-0.897	4.16e-01	7.59e-01	-7.095	L5D3_OR_VS_L5D3_Ctr	noSig	LOC101737840
128	KWMTBOMO00128	0.239	0.211	2.892	3.98e-02	2.11e-01	-4.688	L5D3_OR_VS_L5D3_Ctr	noSig	NA
129	KWMTBOMO00129	-0.083	2.253	-0.204	8.48e-01	1.00e+00	-7.522	L5D3_OR_VS_L5D3_Ctr	noSig	LOC101737973
130	KWMTBOMO00130	-0.192	1.052	-0.677	5.32e-01	8.89e-01	-7.28	L5D3_OR_VS_L5D3_Ctr	noSig	NA
131	KWMTBOMO00131	-0.196	1.302	-0.745	4.94e-01	8.47e-01	-7.228	L5D3_OR_VS_L5D3_Ctr	noSig	LOC101744871
132	KWMTBOMO00132	0	0	0	1.00e+00	1.00e+00	-7.548	L5D3_OR_VS_L5D3_Ctr	noSig	LOC105842495
133	KWMTBOMO00133	-0.014	0.007	-1.041	3.52e-01	6.90e-01	-6.955	L5D3_OR_VS_L5D3_Ctr	noSig	NA
134	KWMTBOMO00134	0	0	0	1.00e+00	1.00e+00	-7.548	L5D3_OR_VS_L5D3_Ctr	noSig	NA
135	KWMTBOMO00135	-0.116	0.439	-0.77	4.81e-01	8.33e-01	-7.208	L5D3_OR_VS_L5D3_Ctr	noSig	LOC101745159
136	KWMTBOMO00136	-0.032	0.026	-0.934	3.99e-01	7.37e-01	-7.06	L5D3_OR_VS_L5D3_Ctr	noSig	NA
137	KWMTBOMO00137	-0.287	0.227	-1.645	1.69e-01	5.08e-01	-6.258	L5D3_OR_VS_L5D3_Ctr	noSig	NA
138	KWMTBOMO00138	-0.04	0.034	-0.749	4.92e-01	8.45e-01	-7.225	L5D3_OR_VS_L5D3_Ctr	noSig	NA
139	KWMTBOMO00139	-0.17	0.672	-1.539	1.92e-01	5.48e-01	-6.388	L5D3_OR_VS_L5D3_Ctr	noSig	NA
140	KWMTBOMO00140	0	0	0	1.00e+00	1.00e+00	-7.548	L5D3_OR_VS_L5D3_Ctr	noSig	LOC101745445
141	KWMTBOMO00141	-0.612	2.279	-1.08	3.36e-01	6.90e-01	-6.915	L5D3_OR_VS_L5D3_Ctr	noSig	LOC101738102
142	KWMTBOMO00142	0	0	0	1.00e+00	1.00e+00	-7.548	L5D3_OR_VS_L5D3_Ctr	noSig	LOC101738234
143	KWMTBOMO00143	0	0	0	1.00e+00	1.00e+00	-7.548	L5D3_OR_VS_L5D3_Ctr	noSig	NA
144	KWMTBOMO00144	0	0	0	1.00e+00	1.00e+00	-7.548	L5D3_OR_VS_L5D3_Ctr	noSig	NA
145	KWMTBOMO00145	-0.023	0.017	-1.114	3.22e-01	6.90e-01	-6.879	L5D3_OR_VS_L5D3_Ctr	noSig	LOC101738460
146	KWMTBOMO00146	0	0	0	1.00e+00	1.00e+00	-7.548	L5D3_OR_VS_L5D3_Ctr	noSig	LOC101738591
147	KWMTBOMO00147	-0.364	5.241	-1.961	1.15e-01	4.02e-01	-5.858	L5D3_OR_VS_L5D3_Ctr	noSig	LOC732866
148	KWMTBOMO00148	0.096	4.03	0.319	7.64e-01	1.00e+00	-7.486	L5D3_OR_VS_L5D3_Ctr	noSig	LOC101738820
149	KWMTBOMO00149	-0.2	0.119	-2.031	1.06e-01	3.83e-01	-5.769	L5D3_OR_VS_L5D3_Ctr	noSig	NA
150	KWMTBOMO00150	-0.262	2.301	-0.617	5.68e-01	9.26e-01	-7.324	L5D3_OR_VS_L5D3_Ctr	noSig	NA
151	KWMTBOMO00151	0.019	0.009	1.044	3.51e-01	6.90e-01	-6.952	L5D3_OR_VS_L5D3_Ctr	noSig	LOC101739052
152	KWMTBOMO00152	-0.324	0.43	-2.243	8.23e-02	3.36e-01	-5.498	L5D3_OR_VS_L5D3_Ctr	noSig	LOC101739198
153	KWMTBOMO00153	-0.299	2.51	-1.386	2.32e-01	6.18e-01	-6.572	L5D3_OR_VS_L5D3_Ctr	noSig	LOC101745741
154	KWMTBOMO00154	-0.22	4.443	-1.082	3.35e-01	6.90e-01	-6.912	L5D3_OR_VS_L5D3_Ctr	noSig	LOC101739335
155	KWMTBOMO00155	-0.589	2.527	-5.917	3.03e-03	4.60e-02	-1.692	L5D3_OR_VS_L5D3_Ctr	down	LOC101745886
156	KWMTBOMO00156	0.005	0.002	0.991	3.73e-01	7.05e-01	-7.006	L5D3_OR_VS_L5D3_Ctr	noSig	nwk
157	KWMTBOMO00157	-0.614	1.541	-1.838	1.33e-01	4.41e-01	-6.015	L5D3_OR_VS_L5D3_Ctr	noSig	LOC101746022
158	KWMTBOMO00158	-0.576	2.521	-3.376	2.41e-02	1.53e-01	-4.117	L5D3_OR_VS_L5D3_Ctr	noSig	LOC101746164
159	KWMTBOMO00159	0.469	3.308	1.645	1.69e-01	5.08e-01	-6.258	L5D3_OR_VS_L5D3_Ctr	noSig	LOC733108
160	KWMTBOMO00160	-0.716	1.982	-1.576	1.84e-01	5.34e-01	-6.344	L5D3_OR_VS_L5D3_Ctr	noSig	LOC101746595
161	KWMTBOMO00161	-0.157	0.176	-7.417	1.21e-03	2.93e-02	-0.618	L5D3_OR_VS_L5D3_Ctr	noSig	NA
162	KWMTBOMO00162	-0.04	0.034	-0.749	4.92e-01	8.45e-01	-7.225	L5D3_OR_VS_L5D3_Ctr	noSig	NA
163	KWMTBOMO00163	0.014	0.007	1.041	3.52e-01	6.90e-01	-6.955	L5D3_OR_VS_L5D3_Ctr	noSig	NA
164	KWMTBOMO00164	-0.111	0.121	-1.052	3.47e-01	6.90e-01	-6.944	L5D3_OR_VS_L5D3_Ctr	noSig	NA
165	KWMTBOMO00165	0	0	0	1.00e+00	1.00e+00	-7.548	L5D3_OR_VS_L5D3_Ctr	noSig	LOC101738352
166	KWMTBOMO00166	0	0	0	1.00e+00	1.00e+00	-7.548	L5D3_OR_VS_L5D3_Ctr	noSig	LOC101738623
167	KWMTBOMO00167	-0.226	3.562	-1.121	3.20e-01	6.90e-01	-6.871	L5D3_OR_VS_L5D3_Ctr	noSig	LOC101738756
168	KWMTBOMO00168	-0.167	2.402	-0.903	4.13e-01	7.55e-01	-7.09	L5D3_OR_VS_L5D3_Ctr	noSig	DnaJ-18
169	KWMTBOMO00169	-0.116	1.062	-1.401	2.28e-01	6.10e-01	-6.555	L5D3_OR_VS_L5D3_Ctr	noSig	LOC101741679
170	KWMTBOMO00170	-0.014	0.007	-1.041	3.52e-01	6.90e-01	-6.955	L5D3_OR_VS_L5D3_Ctr	noSig	LOC101741586
171	KWMTBOMO00171	0	0.028	0.012	9.91e-01	1.00e+00	-7.548	L5D3_OR_VS_L5D3_Ctr	noSig	LOC100174848
172	KWMTBOMO00172	0	0	0	1.00e+00	1.00e+00	-7.548	L5D3_OR_VS_L5D3_Ctr	noSig	LOC110385829
173	KWMTBOMO00173	-0.046	0.023	-1.047	3.49e-01	6.90e-01	-6.949	L5D3_OR_VS_L5D3_Ctr	noSig	NA
174	KWMTBOMO00174	0.014	0.021	0.684	5.29e-01	8.85e-01	-7.276	L5D3_OR_VS_L5D3_Ctr	noSig	LOC101739187
175	KWMTBOMO00175	0.018	0.023	0.54	6.15e-01	9.77e-01	-7.375	L5D3_OR_VS_L5D3_Ctr	noSig	NA
176	KWMTBOMO00176	-0.132	2.193	-0.644	5.52e-01	9.09e-01	-7.305	L5D3_OR_VS_L5D3_Ctr	noSig	LOC101741973
177	KWMTBOMO00177	0.042	1.223	0.136	8.98e-01	1.00e+00	-7.536	L5D3_OR_VS_L5D3_Ctr	noSig	LOC101742113
178	KWMTBOMO00178	-0.388	1.478	-2.047	1.04e-01	3.78e-01	-5.749	L5D3_OR_VS_L5D3_Ctr	noSig	NA
179	KWMTBOMO00179	-0.174	1.154	-0.855	4.37e-01	7.83e-01	-7.134	L5D3_OR_VS_L5D3_Ctr	noSig	PLCg
180	KWMTBOMO00180	0.381	3.596	1.273	2.66e-01	6.73e-01	-6.703	L5D3_OR_VS_L5D3_Ctr	noSig	LOC101739325
181	KWMTBOMO00181	-0.344	2.24	-1.75	1.49e-01	4.71e-01	-6.127	L5D3_OR_VS_L5D3_Ctr	noSig	LOC101742407
182	KWMTBOMO00182	0.43	2.445	1.342	2.45e-01	6.37e-01	-6.624	L5D3_OR_VS_L5D3_Ctr	noSig	LOC101742896
183	KWMTBOMO00183	-0.07	0.04	-7.019	1.52e-03	3.30e-02	-0.882	L5D3_OR_VS_L5D3_Ctr	noSig	NA
184	KWMTBOMO00184	-0.626	3.164	-2.686	4.98e-02	2.44e-01	-4.94	L5D3_OR_VS_L5D3_Ctr	noSig	Fkbp13
185	KWMTBOMO00185	-0.014	0.007	-1.782	1.43e-01	4.60e-01	-6.086	L5D3_OR_VS_L5D3_Ctr	noSig	NA
186	KWMTBOMO00186	-0.78	2.328	-10.305	3.07e-04	1.80e-02	0.975	L5D3_OR_VS_L5D3_Ctr	down	Hepa
187	KWMTBOMO00187	-0.672	1.369	-2.632	5.29e-02	2.53e-01	-5.008	L5D3_OR_VS_L5D3_Ctr	noSig	Hig
188	KWMTBOMO00188	-0.26	0.92	-1.374	2.36e-01	6.23e-01	-6.587	L5D3_OR_VS_L5D3_Ctr	noSig	Cap-d3
189	KWMTBOMO00189	0.09	0.455	0.893	4.18e-01	7.61e-01	-7.099	L5D3_OR_VS_L5D3_Ctr	noSig	Lap
190	KWMTBOMO00190	-0.274	1.439	-1.043	3.51e-01	6.90e-01	-6.953	L5D3_OR_VS_L5D3_Ctr	noSig	Kettin
191	KWMTBOMO00191	-0.338	0.306	-2.819	4.30e-02	2.21e-01	-4.776	L5D3_OR_VS_L5D3_Ctr	noSig	Titin2
192	KWMTBOMO00192	0	0	0	1.00e+00	1.00e+00	-7.548	L5D3_OR_VS_L5D3_Ctr	noSig	Miple
193	KWMTBOMO00193	-0.155	0.077	-1.048	3.49e-01	6.90e-01	-6.948	L5D3_OR_VS_L5D3_Ctr	noSig	NA
194	KWMTBOMO00194	0	0	0	1.00e+00	1.00e+00	-7.548	L5D3_OR_VS_L5D3_Ctr	noSig	LOC101739467
195	KWMTBOMO00195	-0.27	2.03	-1.064	3.42e-01	6.90e-01	-6.931	L5D3_OR_VS_L5D3_Ctr	noSig	Syx6
196	KWMTBOMO00196	0.015	4.265	0.11	9.17e-01	1.00e+00	-7.54	L5D3_OR_VS_L5D3_Ctr	noSig	Pm-scl
197	KWMTBOMO00197	-0.045	4.717	-0.306	7.74e-01	1.00e+00	-7.491	L5D3_OR_VS_L5D3_Ctr	noSig	NA
198	KWMTBOMO00198	0.797	0.65	4.522	8.56e-03	8.18e-02	-2.911	L5D3_OR_VS_L5D3_Ctr	noSig	LOC101739607
199	KWMTBOMO00199	-0.306	0.748	-1.61	1.76e-01	5.23e-01	-6.301	L5D3_OR_VS_L5D3_Ctr	noSig	Tkz
200	KWMTBOMO00200	-0.5	5.294	-4.22	1.10e-02	9.45e-02	-3.209	L5D3_OR_VS_L5D3_Ctr	noSig	Ubcd4
201	KWMTBOMO00201	0.158	4.527	0.723	5.06e-01	8.59e-01	-7.245	L5D3_OR_VS_L5D3_Ctr	noSig	LOC101743037
202	KWMTBOMO00202	0	0	0	1.00e+00	1.00e+00	-7.548	L5D3_OR_VS_L5D3_Ctr	noSig	LOC101743368
203	KWMTBOMO00203	-0.587	3.357	-2.743	4.67e-02	2.33e-01	-4.869	L5D3_OR_VS_L5D3_Ctr	noSig	LOC101743510
204	KWMTBOMO00204	0	0	0	1.00e+00	1.00e+00	-7.548	L5D3_OR_VS_L5D3_Ctr	noSig	LOC101739748
205	KWMTBOMO00205	0.306	1.237	1.094	3.30e-01	6.90e-01	-6.9	L5D3_OR_VS_L5D3_Ctr	noSig	LOC101739885
206	KWMTBOMO00206	-0.707	0.66	-4.794	6.87e-03	7.18e-02	-2.653	L5D3_OR_VS_L5D3_Ctr	noSig	NA
207	KWMTBOMO00207	-0.148	0.369	-0.648	5.49e-01	9.06e-01	-7.302	L5D3_OR_VS_L5D3_Ctr	noSig	NA
208	KWMTBOMO00208	-0.182	0.158	-2.172	8.95e-02	3.53e-01	-5.588	L5D3_OR_VS_L5D3_Ctr	noSig	LOC101743847
209	KWMTBOMO00209	-0.892	5.524	-4.626	7.87e-03	7.79e-02	-2.812	L5D3_OR_VS_L5D3_Ctr	noSig	LOC101744139
210	KWMTBOMO00210	-0.549	3.73	-2.356	7.22e-02	3.08e-01	-5.354	L5D3_OR_VS_L5D3_Ctr	noSig	DnaJ-17
211	KWMTBOMO00211	-0.096	0.987	-0.772	4.79e-01	8.32e-01	-7.205	L5D3_OR_VS_L5D3_Ctr	noSig	LOC101744420
212	KWMTBOMO00212	0	0	0	1.00e+00	1.00e+00	-7.548	L5D3_OR_VS_L5D3_Ctr	noSig	LOC105842162
213	KWMTBOMO00213	-0.28	1.56	-0.925	4.03e-01	7.43e-01	-7.069	L5D3_OR_VS_L5D3_Ctr	noSig	LOC101744713
214	KWMTBOMO00214	-0.655	1.622	-2.312	7.60e-02	3.18e-01	-5.41	L5D3_OR_VS_L5D3_Ctr	noSig	LOC101744860
215	KWMTBOMO00215	0.028	0.014	2.081	9.97e-02	3.72e-01	-5.705	L5D3_OR_VS_L5D3_Ctr	noSig	LOC101740018
216	KWMTBOMO00216	-0.191	0.367	-1.706	1.57e-01	4.88e-01	-6.182	L5D3_OR_VS_L5D3_Ctr	noSig	LOC101740153
217	KWMTBOMO00217	-0.426	1.269	-1.285	2.62e-01	6.67e-01	-6.69	L5D3_OR_VS_L5D3_Ctr	noSig	NA
218	KWMTBOMO00218	0.064	0.392	0.616	5.68e-01	9.27e-01	-7.325	L5D3_OR_VS_L5D3_Ctr	noSig	NA
219	KWMTBOMO00219	0.077	0.847	0.287	7.87e-01	1.00e+00	-7.498	L5D3_OR_VS_L5D3_Ctr	noSig	LOC105842161
220	KWMTBOMO00220	-0.168	0.14	-1.086	3.34e-01	6.90e-01	-6.909	L5D3_OR_VS_L5D3_Ctr	noSig	LOC101745000
221	KWMTBOMO00221	-0.108	0.105	-1.007	3.66e-01	7.03e-01	-6.989	L5D3_OR_VS_L5D3_Ctr	noSig	LOC101740424
222	KWMTBOMO00222	-0.203	3.343	-2.622	5.35e-02	2.53e-01	-5.02	L5D3_OR_VS_L5D3_Ctr	noSig	NA
223	KWMTBOMO00223	-0.018	3.988	-0.183	8.63e-01	1.00e+00	-7.527	L5D3_OR_VS_L5D3_Ctr	noSig	Gk
224	KWMTBOMO00224	-0.028	0.014	-1.046	3.50e-01	6.90e-01	-6.95	L5D3_OR_VS_L5D3_Ctr	noSig	Cyp305b1
225	KWMTBOMO00225	0.028	0.182	0.31	7.71e-01	1.00e+00	-7.489	L5D3_OR_VS_L5D3_Ctr	noSig	NA
226	KWMTBOMO00226	0	0	0	1.00e+00	1.00e+00	-7.548	L5D3_OR_VS_L5D3_Ctr	noSig	RDL2
227	KWMTBOMO00227	0	0	0	1.00e+00	1.00e+00	-7.548	L5D3_OR_VS_L5D3_Ctr	noSig	LOC101745296
228	KWMTBOMO00228	0	0	0	1.00e+00	1.00e+00	-7.548	L5D3_OR_VS_L5D3_Ctr	noSig	LOC101740691
229	KWMTBOMO00229	-0.06	0.03	-1.951	1.17e-01	4.05e-01	-5.872	L5D3_OR_VS_L5D3_Ctr	noSig	LOC101740832
230	KWMTBOMO00230	0	0	0	1.00e+00	1.00e+00	-7.548	L5D3_OR_VS_L5D3_Ctr	noSig	rdl1
231	KWMTBOMO00231	0	0	0	1.00e+00	1.00e+00	-7.548	L5D3_OR_VS_L5D3_Ctr	noSig	LOC101740977
232	KWMTBOMO00232	-0.049	0.116	-0.815	4.57e-01	8.07e-01	-7.169	L5D3_OR_VS_L5D3_Ctr	noSig	NA
233	KWMTBOMO00233	-0.051	0.077	-1.436	2.18e-01	5.92e-01	-6.514	L5D3_OR_VS_L5D3_Ctr	noSig	NA
234	KWMTBOMO00234	0.072	0.623	0.277	7.94e-01	1.00e+00	-7.501	L5D3_OR_VS_L5D3_Ctr	noSig	LOC101741118
235	KWMTBOMO00235	-0.662	1.499	-4.319	1.02e-02	8.98e-02	-3.11	L5D3_OR_VS_L5D3_Ctr	noSig	LOC101745683
236	KWMTBOMO00236	-0.957	1.596	-7.101	1.45e-03	3.22e-02	-0.827	L5D3_OR_VS_L5D3_Ctr	down	LOC101745832
237	KWMTBOMO00237	-0.402	5.149	-1.166	3.03e-01	6.90e-01	-6.823	L5D3_OR_VS_L5D3_Ctr	noSig	LOC101746062
238	KWMTBOMO00238	0.343	2.017	3.763	1.67e-02	1.21e-01	-3.687	L5D3_OR_VS_L5D3_Ctr	noSig	Idgf
239	KWMTBOMO00239	0	0	0	1.00e+00	1.00e+00	-7.548	L5D3_OR_VS_L5D3_Ctr	noSig	LOC101746302
240	KWMTBOMO00240	-0.009	0.024	-0.317	7.66e-01	1.00e+00	-7.487	L5D3_OR_VS_L5D3_Ctr	noSig	LOC101741260
241	KWMTBOMO00241	-0.241	0.861	-1.015	3.63e-01	6.99e-01	-6.981	L5D3_OR_VS_L5D3_Ctr	noSig	LOC101742576
242	KWMTBOMO00242	-0.908	2.811	-7.782	9.96e-04	2.73e-02	-0.386	L5D3_OR_VS_L5D3_Ctr	down	LOC101746534
243	KWMTBOMO00243	0.054	0.046	1.108	3.25e-01	6.90e-01	-6.885	L5D3_OR_VS_L5D3_Ctr	noSig	LOC101746670
244	KWMTBOMO00244	0.019	0.009	1.044	3.51e-01	6.90e-01	-6.952	L5D3_OR_VS_L5D3_Ctr	noSig	Th
245	KWMTBOMO00245	0	0	0	1.00e+00	1.00e+00	-7.548	L5D3_OR_VS_L5D3_Ctr	noSig	NA
246	KWMTBOMO00246	0.019	0.024	0.889	4.20e-01	7.63e-01	-7.103	L5D3_OR_VS_L5D3_Ctr	noSig	BmMET2
247	KWMTBOMO00247	0.176	0.116	3.061	3.33e-02	1.87e-01	-4.485	L5D3_OR_VS_L5D3_Ctr	noSig	LOC101746809
248	KWMTBOMO00248	0.001	0.309	0.003	9.98e-01	1.00e+00	-7.548	L5D3_OR_VS_L5D3_Ctr	noSig	LOC100302628
249	KWMTBOMO00249	-0.331	0.549	-1.89	1.25e-01	4.24e-01	-5.949	L5D3_OR_VS_L5D3_Ctr	noSig	LOC101741399
250	KWMTBOMO00250	0.158	0.079	1.048	3.49e-01	6.90e-01	-6.948	L5D3_OR_VS_L5D3_Ctr	noSig	LOC101746951
251	KWMTBOMO00251	0	0	0	1.00e+00	1.00e+00	-7.548	L5D3_OR_VS_L5D3_Ctr	noSig	LOC105841711
252	KWMTBOMO00252	0	0	0	1.00e+00	1.00e+00	-7.548	L5D3_OR_VS_L5D3_Ctr	noSig	LOC101741681
253	KWMTBOMO00253	0	0	0	1.00e+00	1.00e+00	-7.548	L5D3_OR_VS_L5D3_Ctr	noSig	NA
254	KWMTBOMO00254	-0.126	7.446	-1.267	2.68e-01	6.76e-01	-6.711	L5D3_OR_VS_L5D3_Ctr	noSig	Tpi
255	KWMTBOMO00255	-0.914	1.366	-3.335	2.52e-02	1.57e-01	-4.165	L5D3_OR_VS_L5D3_Ctr	noSig	LOC101747083
256	KWMTBOMO00256	-0.039	3.903	-0.112	9.16e-01	1.00e+00	-7.54	L5D3_OR_VS_L5D3_Ctr	noSig	LOC101747219
257	KWMTBOMO00257	0	0	0	1.00e+00	1.00e+00	-7.548	L5D3_OR_VS_L5D3_Ctr	noSig	LOC101741824
258	KWMTBOMO00258	0.01	0.005	1.032	3.55e-01	6.90e-01	-6.964	L5D3_OR_VS_L5D3_Ctr	noSig	LOC101735522
259	KWMTBOMO00259	0	0	0	1.00e+00	1.00e+00	-7.548	L5D3_OR_VS_L5D3_Ctr	noSig	LOC101735659
260	KWMTBOMO00260	0	0	0	1.00e+00	1.00e+00	-7.548	L5D3_OR_VS_L5D3_Ctr	noSig	NA
261	KWMTBOMO00261	0	0	0	1.00e+00	1.00e+00	-7.548	L5D3_OR_VS_L5D3_Ctr	noSig	LOC101735933
262	KWMTBOMO00262	-0.178	0.156	-1.201	2.90e-01	6.90e-01	-6.784	L5D3_OR_VS_L5D3_Ctr	noSig	NA
263	KWMTBOMO00263	-0.102	0.601	-0.282	7.90e-01	1.00e+00	-7.499	L5D3_OR_VS_L5D3_Ctr	noSig	LOC105842174
264	KWMTBOMO00264	-0.194	0.578	-1.628	1.73e-01	5.15e-01	-6.279	L5D3_OR_VS_L5D3_Ctr	noSig	LOC101736195
265	KWMTBOMO00265	-1.042	6.247	-11.12	2.22e-04	1.64e-02	1.343	L5D3_OR_VS_L5D3_Ctr	down	LOC692928
266	KWMTBOMO00266	0.302	0.22	3.86	1.52e-02	1.15e-01	-3.583	L5D3_OR_VS_L5D3_Ctr	noSig	LOC101736368
267	KWMTBOMO00267	-0.658	0.971	-2.411	6.78e-02	2.97e-01	-5.285	L5D3_OR_VS_L5D3_Ctr	noSig	LOC101736487
268	KWMTBOMO00268	0	0	0	1.00e+00	1.00e+00	-7.548	L5D3_OR_VS_L5D3_Ctr	noSig	BmILP
269	KWMTBOMO00269	0	0	0	1.00e+00	1.00e+00	-7.548	L5D3_OR_VS_L5D3_Ctr	noSig	LOC101736626
270	KWMTBOMO00270	0.115	3.735	0.402	7.06e-01	1.00e+00	-7.45	L5D3_OR_VS_L5D3_Ctr	noSig	LOC733047
271	KWMTBOMO00271	-0.621	4.003	-3.445	2.26e-02	1.47e-01	-4.039	L5D3_OR_VS_L5D3_Ctr	noSig	LOC101736769
272	KWMTBOMO00272	-0.485	0.704	-2.209	8.57e-02	3.43e-01	-5.541	L5D3_OR_VS_L5D3_Ctr	noSig	LOC101736897
273	KWMTBOMO00273	-0.83	1.732	-6.329	2.32e-03	4.01e-02	-1.375	L5D3_OR_VS_L5D3_Ctr	down	NA
274	KWMTBOMO00274	-0.544	1.574	-2.439	6.57e-02	2.91e-01	-5.249	L5D3_OR_VS_L5D3_Ctr	noSig	LOC101737120
275	KWMTBOMO00275	-0.619	0.736	-4.188	1.14e-02	9.58e-02	-3.242	L5D3_OR_VS_L5D3_Ctr	noSig	LOC101741974
276	KWMTBOMO00276	-0.341	0.611	-1.653	1.67e-01	5.05e-01	-6.248	L5D3_OR_VS_L5D3_Ctr	noSig	LOC101742114
277	KWMTBOMO00277	-1.503	4.184	-7.644	1.07e-03	2.78e-02	-0.472	L5D3_OR_VS_L5D3_Ctr	down	LOC101737363
278	KWMTBOMO00278	-1.032	4.029	-10.485	2.85e-04	1.76e-02	1.059	L5D3_OR_VS_L5D3_Ctr	down	LOC101737505
279	KWMTBOMO00279	-0.341	7.889	-1.925	1.20e-01	4.13e-01	-5.905	L5D3_OR_VS_L5D3_Ctr	noSig	LOC101737646
280	KWMTBOMO00280	-0.619	2.217	-3.862	1.52e-02	1.15e-01	-3.581	L5D3_OR_VS_L5D3_Ctr	noSig	LOC101737871
281	KWMTBOMO00281	-0.288	0.633	-1.534	1.93e-01	5.50e-01	-6.394	L5D3_OR_VS_L5D3_Ctr	noSig	LOC101742555
282	KWMTBOMO00282	0	0	0	1.00e+00	1.00e+00	-7.548	L5D3_OR_VS_L5D3_Ctr	noSig	LOC105842165
283	KWMTBOMO00283	0	0	0	1.00e+00	1.00e+00	-7.548	L5D3_OR_VS_L5D3_Ctr	noSig	LOC101742700
284	KWMTBOMO00284	0	0	0	1.00e+00	1.00e+00	-7.548	L5D3_OR_VS_L5D3_Ctr	noSig	NGR-B4
285	KWMTBOMO00285	-0.033	0.016	-1.046	3.50e-01	6.90e-01	-6.95	L5D3_OR_VS_L5D3_Ctr	noSig	NA
286	KWMTBOMO00286	-0.031	0.035	-0.612	5.71e-01	9.29e-01	-7.328	L5D3_OR_VS_L5D3_Ctr	noSig	NA
287	KWMTBOMO00287	0	0	0	1.00e+00	1.00e+00	-7.548	L5D3_OR_VS_L5D3_Ctr	noSig	LOC101738006
288	KWMTBOMO00288	0	0	0	1.00e+00	1.00e+00	-7.548	L5D3_OR_VS_L5D3_Ctr	noSig	NA
289	KWMTBOMO00289	0	0	0	1.00e+00	1.00e+00	-7.548	L5D3_OR_VS_L5D3_Ctr	noSig	LOC101742848
290	KWMTBOMO00290	-0.27	3.239	-0.715	5.11e-01	8.65e-01	-7.252	L5D3_OR_VS_L5D3_Ctr	noSig	LOC101738134
291	KWMTBOMO00291	-0.102	5.121	-0.879	4.25e-01	7.69e-01	-7.112	L5D3_OR_VS_L5D3_Ctr	noSig	LOC692898
292	KWMTBOMO00292	0	0	0	1.00e+00	1.00e+00	-7.548	L5D3_OR_VS_L5D3_Ctr	noSig	NA
293	KWMTBOMO00293	-0.217	0.682	-0.631	5.60e-01	9.18e-01	-7.315	L5D3_OR_VS_L5D3_Ctr	noSig	LOC101738265
294	KWMTBOMO00294	-0.135	3.501	-0.635	5.57e-01	9.15e-01	-7.311	L5D3_OR_VS_L5D3_Ctr	noSig	LOC101738622
295	KWMTBOMO00295	0.01	0.005	1.032	3.55e-01	6.90e-01	-6.964	L5D3_OR_VS_L5D3_Ctr	noSig	LOC101738493
296	KWMTBOMO00296	-0.075	0.117	-2.211	8.56e-02	3.43e-01	-5.539	L5D3_OR_VS_L5D3_Ctr	noSig	NA
297	KWMTBOMO00297	-0.085	0.17	-1.673	1.63e-01	4.98e-01	-6.223	L5D3_OR_VS_L5D3_Ctr	noSig	NA
298	KWMTBOMO00298	0.106	0.053	3.408	2.34e-02	1.50e-01	-4.081	L5D3_OR_VS_L5D3_Ctr	noSig	CPT1
299	KWMTBOMO00299	-0.67	3.066	-19.851	1.82e-05	7.40e-03	4.012	L5D3_OR_VS_L5D3_Ctr	down	LOC101742989
300	KWMTBOMO00300	-1.016	3.572	-2.386	6.98e-02	3.02e-01	-5.317	L5D3_OR_VS_L5D3_Ctr	noSig	NA
301	KWMTBOMO00301	-0.5	3.028	-1.685	1.61e-01	4.95e-01	-6.209	L5D3_OR_VS_L5D3_Ctr	noSig	LOC101738899
302	KWMTBOMO00302	-0.6	4.633	-3.492	2.16e-02	1.43e-01	-3.986	L5D3_OR_VS_L5D3_Ctr	noSig	LOC101739139
303	KWMTBOMO00303	-0.199	3.028	-0.811	4.59e-01	8.09e-01	-7.173	L5D3_OR_VS_L5D3_Ctr	noSig	LOC101739551
304	KWMTBOMO00304	0.004	0.035	0.095	9.28e-01	1.00e+00	-7.542	L5D3_OR_VS_L5D3_Ctr	noSig	NA
305	KWMTBOMO00305	0	0	0	1.00e+00	1.00e+00	-7.548	L5D3_OR_VS_L5D3_Ctr	noSig	NA
306	KWMTBOMO00306	-0.311	0.252	-2.246	8.21e-02	3.35e-01	-5.495	L5D3_OR_VS_L5D3_Ctr	noSig	LOC101743131
307	KWMTBOMO00307	0	0	0	1.00e+00	1.00e+00	-7.548	L5D3_OR_VS_L5D3_Ctr	noSig	LOC101739695
308	KWMTBOMO00308	-0.437	0.75	-4.335	1.00e-02	8.92e-02	-3.094	L5D3_OR_VS_L5D3_Ctr	noSig	MSL1
309	KWMTBOMO00309	-0.368	0.184	-1.048	3.49e-01	6.90e-01	-6.948	L5D3_OR_VS_L5D3_Ctr	noSig	NA
310	KWMTBOMO00310	0.005	0.002	0.991	3.73e-01	7.05e-01	-7.006	L5D3_OR_VS_L5D3_Ctr	noSig	LOC101739837
311	KWMTBOMO00311	0	0	0	1.00e+00	1.00e+00	-7.548	L5D3_OR_VS_L5D3_Ctr	noSig	LOC101740106
312	KWMTBOMO00312	0	0	0	1.00e+00	1.00e+00	-7.548	L5D3_OR_VS_L5D3_Ctr	noSig	LOC101739975
313	KWMTBOMO00313	-0.022	0.044	-0.362	7.34e-01	1.00e+00	-7.468	L5D3_OR_VS_L5D3_Ctr	noSig	LOC101740242
314	KWMTBOMO00314	-1.329	1.777	-6.274	2.40e-03	4.12e-02	-1.417	L5D3_OR_VS_L5D3_Ctr	down	LOC101743416
315	KWMTBOMO00315	-0.224	2.787	-1.19	2.95e-01	6.90e-01	-6.797	L5D3_OR_VS_L5D3_Ctr	noSig	LOC101740377
316	KWMTBOMO00316	0	0	0	1.00e+00	1.00e+00	-7.548	L5D3_OR_VS_L5D3_Ctr	noSig	LOC101740601
317	KWMTBOMO00317	0	0	0	1.00e+00	1.00e+00	-7.548	L5D3_OR_VS_L5D3_Ctr	noSig	LOC101740738
318	KWMTBOMO00318	0	0	0	1.00e+00	1.00e+00	-7.548	L5D3_OR_VS_L5D3_Ctr	noSig	LOC101740877
319	KWMTBOMO00319	0.01	0.005	1.032	3.55e-01	6.90e-01	-6.964	L5D3_OR_VS_L5D3_Ctr	noSig	LOC101743556
320	KWMTBOMO00320	0.126	0.118	2.415	6.75e-02	2.96e-01	-5.28	L5D3_OR_VS_L5D3_Ctr	noSig	NA
321	KWMTBOMO00321	-0.002	0.182	-0.016	9.88e-01	1.00e+00	-7.548	L5D3_OR_VS_L5D3_Ctr	noSig	LOC101741018
322	KWMTBOMO00322	0	0	0	1.00e+00	1.00e+00	-7.548	L5D3_OR_VS_L5D3_Ctr	noSig	NA
323	KWMTBOMO00323	-0.01	0.005	-1.981	1.12e-01	3.96e-01	-5.833	L5D3_OR_VS_L5D3_Ctr	noSig	LOC101743697
324	KWMTBOMO00324	-0.638	2.872	-2.687	4.97e-02	2.44e-01	-4.938	L5D3_OR_VS_L5D3_Ctr	noSig	NA
325	KWMTBOMO00325	-0.742	2.867	-6.295	2.37e-03	4.07e-02	-1.401	L5D3_OR_VS_L5D3_Ctr	down	LOC101741166
326	KWMTBOMO00326	-0.531	2.89	-1.815	1.37e-01	4.48e-01	-6.045	L5D3_OR_VS_L5D3_Ctr	noSig	LOC101743848
327	KWMTBOMO00327	-0.926	1.348	-3.184	2.93e-02	1.73e-01	-4.339	L5D3_OR_VS_L5D3_Ctr	noSig	LOC101743995
328	KWMTBOMO00328	-0.286	0.569	-1.067	3.41e-01	6.90e-01	-6.929	L5D3_OR_VS_L5D3_Ctr	noSig	LOC101741539
329	KWMTBOMO00329	0.127	0.063	2.596	5.50e-02	2.58e-01	-5.052	L5D3_OR_VS_L5D3_Ctr	noSig	LOC101744140
330	KWMTBOMO00330	0	0	0	1.00e+00	1.00e+00	-7.548	L5D3_OR_VS_L5D3_Ctr	noSig	LOC101744279
331	KWMTBOMO00331	0.099	1.116	0.464	6.65e-01	1.00e+00	-7.419	L5D3_OR_VS_L5D3_Ctr	noSig	LOC101744421
332	KWMTBOMO00332	0.208	0.104	4.385	9.60e-03	8.74e-02	-3.045	L5D3_OR_VS_L5D3_Ctr	noSig	Nep-L
333	KWMTBOMO00333	0.156	0.11	3.328	2.53e-02	1.57e-01	-4.172	L5D3_OR_VS_L5D3_Ctr	noSig	NA
334	KWMTBOMO00334	0.21	1.477	1.031	3.56e-01	6.91e-01	-6.965	L5D3_OR_VS_L5D3_Ctr	noSig	LOC101741823
335	KWMTBOMO00335	0	0	0	1.00e+00	1.00e+00	-7.548	L5D3_OR_VS_L5D3_Ctr	noSig	LOC101742068
336	KWMTBOMO00336	-1.402	5.618	-3.784	1.63e-02	1.20e-01	-3.664	L5D3_OR_VS_L5D3_Ctr	noSig	LOC101742358
337	KWMTBOMO00337	-1.343	3.14	-3.891	1.48e-02	1.13e-01	-3.55	L5D3_OR_VS_L5D3_Ctr	noSig	NA
338	KWMTBOMO00338	-0.161	4.178	-0.941	3.95e-01	7.34e-01	-7.054	L5D3_OR_VS_L5D3_Ctr	noSig	LOC101744714
339	KWMTBOMO00339	0.386	11.117	3.338	2.51e-02	1.56e-01	-4.161	L5D3_OR_VS_L5D3_Ctr	noSig	Ybp
340	KWMTBOMO00340	-0.177	4.155	-0.867	4.31e-01	7.77e-01	-7.123	L5D3_OR_VS_L5D3_Ctr	noSig	Cat
341	KWMTBOMO00341	0	0	0	1.00e+00	1.00e+00	-7.548	L5D3_OR_VS_L5D3_Ctr	noSig	LOC101742649
342	KWMTBOMO00342	-0.106	0.177	-2.288	7.81e-02	3.25e-01	-5.44	L5D3_OR_VS_L5D3_Ctr	noSig	be2
343	KWMTBOMO00343	0	0	0	1.00e+00	1.00e+00	-7.548	L5D3_OR_VS_L5D3_Ctr	noSig	LOC101740035
344	KWMTBOMO00344	0.19	0.095	2.872	4.07e-02	2.13e-01	-4.712	L5D3_OR_VS_L5D3_Ctr	noSig	LOC101745147
345	KWMTBOMO00345	-0.422	2.327	-2.411	6.78e-02	2.97e-01	-5.284	L5D3_OR_VS_L5D3_Ctr	noSig	LOC101743038
346	KWMTBOMO00346	0	0	0	1.00e+00	1.00e+00	-7.548	L5D3_OR_VS_L5D3_Ctr	noSig	LOC101742897
347	KWMTBOMO00347	-0.449	2.99	-2.108	9.66e-02	3.70e-01	-5.67	L5D3_OR_VS_L5D3_Ctr	noSig	NA
348	KWMTBOMO00348	0.084	0.042	1.047	3.49e-01	6.90e-01	-6.948	L5D3_OR_VS_L5D3_Ctr	noSig	LOC101743186
349	KWMTBOMO00349	0	0	0	1.00e+00	1.00e+00	-7.548	L5D3_OR_VS_L5D3_Ctr	noSig	LOC101745297
350	KWMTBOMO00350	0.05	0.025	1.047	3.49e-01	6.90e-01	-6.949	L5D3_OR_VS_L5D3_Ctr	noSig	LOC101743415
351	KWMTBOMO00351	0.155	0.077	1.048	3.49e-01	6.90e-01	-6.948	L5D3_OR_VS_L5D3_Ctr	noSig	NA
352	KWMTBOMO00352	-0.59	2.508	-3.715	1.74e-02	1.26e-01	-3.739	L5D3_OR_VS_L5D3_Ctr	noSig	LOC101743555
353	KWMTBOMO00353	-0.478	0.598	-2.219	8.47e-02	3.41e-01	-5.528	L5D3_OR_VS_L5D3_Ctr	noSig	LOC101745437
354	KWMTBOMO00354	-0.059	0.053	-1.092	3.31e-01	6.90e-01	-6.902	L5D3_OR_VS_L5D3_Ctr	noSig	CPT2
355	KWMTBOMO00355	-0.182	0.138	-3.206	2.86e-02	1.71e-01	-4.313	L5D3_OR_VS_L5D3_Ctr	noSig	NA
356	KWMTBOMO00356	-0.11	0.17	-2.07	1.01e-01	3.73e-01	-5.72	L5D3_OR_VS_L5D3_Ctr	noSig	NA
357	KWMTBOMO00357	0	0	0	1.00e+00	1.00e+00	-7.548	L5D3_OR_VS_L5D3_Ctr	noSig	LOC101740860
358	KWMTBOMO00358	-1.205	2.466	-3.919	1.44e-02	1.12e-01	-3.521	L5D3_OR_VS_L5D3_Ctr	noSig	LOC101744185
359	KWMTBOMO00359	-0.175	0.179	-0.65	5.48e-01	9.05e-01	-7.301	L5D3_OR_VS_L5D3_Ctr	noSig	NA
360	KWMTBOMO00360	0.111	0.056	70.63	7.06e-08	6.55e-04	7.615	L5D3_OR_VS_L5D3_Ctr	noSig	NA
361	KWMTBOMO00361	-0.729	2.884	-4.272	1.06e-02	9.21e-02	-3.157	L5D3_OR_VS_L5D3_Ctr	noSig	LOC101743792
362	KWMTBOMO00362	-0.2	5.522	-1.116	3.22e-01	6.90e-01	-6.877	L5D3_OR_VS_L5D3_Ctr	noSig	LOC101744330
363	KWMTBOMO00363	-0.215	1.042	-0.747	4.93e-01	8.46e-01	-7.226	L5D3_OR_VS_L5D3_Ctr	noSig	LOC101745877
364	KWMTBOMO00364	-0.354	0.726	-2.371	7.10e-02	3.05e-01	-5.335	L5D3_OR_VS_L5D3_Ctr	noSig	LOC101746015
365	KWMTBOMO00365	0	0	0	1.00e+00	1.00e+00	-7.548	L5D3_OR_VS_L5D3_Ctr	noSig	LOC101744665
366	KWMTBOMO00366	-0.079	2.722	-0.185	8.61e-01	1.00e+00	-7.527	L5D3_OR_VS_L5D3_Ctr	noSig	LOC101745047
367	KWMTBOMO00367	0	0	0	1.00e+00	1.00e+00	-7.548	L5D3_OR_VS_L5D3_Ctr	noSig	NA
368	KWMTBOMO00368	0.37	0.602	1.98	1.13e-01	3.96e-01	-5.834	L5D3_OR_VS_L5D3_Ctr	noSig	LOC101746155
369	KWMTBOMO00369	0	0	0	1.00e+00	1.00e+00	-7.548	L5D3_OR_VS_L5D3_Ctr	noSig	LOC101745488
370	KWMTBOMO00370	0	0	0	1.00e+00	1.00e+00	-7.548	L5D3_OR_VS_L5D3_Ctr	noSig	LOC101745729
371	KWMTBOMO00371	0	0	0	1.00e+00	1.00e+00	-7.548	L5D3_OR_VS_L5D3_Ctr	noSig	NA
372	KWMTBOMO00372	0	0	0	1.00e+00	1.00e+00	-7.548	L5D3_OR_VS_L5D3_Ctr	noSig	LOC101745876
373	KWMTBOMO00373	-1.115	5.99	-5.096	5.44e-03	6.29e-02	-2.379	L5D3_OR_VS_L5D3_Ctr	noSig	LOC101746014
374	KWMTBOMO00374	-0.599	0.874	-2.744	4.67e-02	2.33e-01	-4.868	L5D3_OR_VS_L5D3_Ctr	noSig	LOC101746723
375	KWMTBOMO00375	-0.42	6.476	-4.704	7.38e-03	7.48e-02	-2.738	L5D3_OR_VS_L5D3_Ctr	noSig	LOC101746258
376	KWMTBOMO00376	0.165	0.083	1.048	3.49e-01	6.90e-01	-6.948	L5D3_OR_VS_L5D3_Ctr	noSig	NA
377	KWMTBOMO00377	-0.032	0.167	-0.215	8.39e-01	1.00e+00	-7.519	L5D3_OR_VS_L5D3_Ctr	noSig	NA
378	KWMTBOMO00378	-0.244	1.238	-1.317	2.52e-01	6.51e-01	-6.654	L5D3_OR_VS_L5D3_Ctr	noSig	NA
379	KWMTBOMO00379	-1.027	2.513	-2.872	4.06e-02	2.13e-01	-4.711	L5D3_OR_VS_L5D3_Ctr	noSig	Ftz-f1
380	KWMTBOMO00380	0.25	3.669	1.994	1.11e-01	3.92e-01	-5.816	L5D3_OR_VS_L5D3_Ctr	noSig	LOC732961
381	KWMTBOMO00381	0	0	0	1.00e+00	1.00e+00	-7.548	L5D3_OR_VS_L5D3_Ctr	noSig	LOC101746998
382	KWMTBOMO00382	-0.482	0.705	-2.528	5.94e-02	2.72e-01	-5.137	L5D3_OR_VS_L5D3_Ctr	noSig	PH
383	KWMTBOMO00383	-0.023	0.012	-1.045	3.50e-01	6.90e-01	-6.951	L5D3_OR_VS_L5D3_Ctr	noSig	NA
384	KWMTBOMO00384	0	0	0	1.00e+00	1.00e+00	-7.548	L5D3_OR_VS_L5D3_Ctr	noSig	NA
385	KWMTBOMO00385	0.01	0.005	1.032	3.55e-01	6.90e-01	-6.964	L5D3_OR_VS_L5D3_Ctr	noSig	NA
386	KWMTBOMO00386	-0.123	0.071	-7.037	1.51e-03	3.28e-02	-0.87	L5D3_OR_VS_L5D3_Ctr	noSig	LOC101747134
387	KWMTBOMO00387	0.005	4.476	0.023	9.83e-01	1.00e+00	-7.547	L5D3_OR_VS_L5D3_Ctr	noSig	LOC101741189
388	KWMTBOMO00388	-0.167	1.668	-0.442	6.80e-01	1.00e+00	-7.431	L5D3_OR_VS_L5D3_Ctr	noSig	LOC101735340
389	KWMTBOMO00389	-1.995	1.231	-23.174	9.28e-06	5.59e-03	4.653	L5D3_OR_VS_L5D3_Ctr	down	LOC101746722
390	KWMTBOMO00390	-0.714	11.963	-7.605	1.10e-03	2.81e-02	-0.497	L5D3_OR_VS_L5D3_Ctr	down	LOC101746861
391	KWMTBOMO00391	0.08	4.313	0.348	7.44e-01	1.00e+00	-7.474	L5D3_OR_VS_L5D3_Ctr	noSig	LOC110385812
392	KWMTBOMO00392	-0.98	3.495	-5.679	3.57e-03	4.99e-02	-1.883	L5D3_OR_VS_L5D3_Ctr	down	LOC101747133
393	KWMTBOMO00393	-0.601	3.687	-3.209	2.86e-02	1.70e-01	-4.311	L5D3_OR_VS_L5D3_Ctr	noSig	LOC101746997
394	KWMTBOMO00394	0	0	0	1.00e+00	1.00e+00	-7.548	L5D3_OR_VS_L5D3_Ctr	noSig	LOC101735479
395	KWMTBOMO00395	0.019	0.009	1.044	3.51e-01	6.90e-01	-6.952	L5D3_OR_VS_L5D3_Ctr	noSig	LOC105842151
396	KWMTBOMO00396	0.05	0.081	1.682	1.62e-01	4.96e-01	-6.212	L5D3_OR_VS_L5D3_Ctr	noSig	LOC101735430
397	KWMTBOMO00397	-0.476	0.348	-8.063	8.59e-04	2.56e-02	-0.214	L5D3_OR_VS_L5D3_Ctr	noSig	LOC101735703
398	KWMTBOMO00398	0.036	1.755	0.183	8.63e-01	1.00e+00	-7.527	L5D3_OR_VS_L5D3_Ctr	noSig	LOC101735840
399	KWMTBOMO00399	-0.567	1.386	-1.841	1.33e-01	4.40e-01	-6.011	L5D3_OR_VS_L5D3_Ctr	noSig	NA
400	KWMTBOMO00400	0.251	1.415	1.913	1.22e-01	4.17e-01	-5.92	L5D3_OR_VS_L5D3_Ctr	noSig	LOC101735755
401	KWMTBOMO00401	-0.434	1.537	-2.4	6.87e-02	2.99e-01	-5.299	L5D3_OR_VS_L5D3_Ctr	noSig	LOC101735887
402	KWMTBOMO00402	-0.023	0.012	-1.045	3.50e-01	6.90e-01	-6.951	L5D3_OR_VS_L5D3_Ctr	noSig	LOC101736015
403	KWMTBOMO00403	-0.348	3.255	-1.147	3.10e-01	6.90e-01	-6.843	L5D3_OR_VS_L5D3_Ctr	noSig	LOC101736151
404	KWMTBOMO00404	0	0	0	1.00e+00	1.00e+00	-7.548	L5D3_OR_VS_L5D3_Ctr	noSig	LOC101736287
405	KWMTBOMO00405	0	0	0	1.00e+00	1.00e+00	-7.548	L5D3_OR_VS_L5D3_Ctr	noSig	Or-1
406	KWMTBOMO00406	-0.495	0.367	-2.269	7.99e-02	3.30e-01	-5.465	L5D3_OR_VS_L5D3_Ctr	noSig	LOC101736103
407	KWMTBOMO00407	-0.376	1.166	-1.574	1.84e-01	5.34e-01	-6.346	L5D3_OR_VS_L5D3_Ctr	noSig	LOC101736416
408	KWMTBOMO00408	0.17	1.233	0.669	5.37e-01	8.94e-01	-7.287	L5D3_OR_VS_L5D3_Ctr	noSig	LOC101736542
409	KWMTBOMO00409	0.063	0.032	1.047	3.49e-01	6.90e-01	-6.949	L5D3_OR_VS_L5D3_Ctr	noSig	LOC101736369
410	KWMTBOMO00410	0	0	0	1.00e+00	1.00e+00	-7.548	L5D3_OR_VS_L5D3_Ctr	noSig	LOC101736488
411	KWMTBOMO00411	-0.919	2.623	-3.894	1.48e-02	1.13e-01	-3.547	L5D3_OR_VS_L5D3_Ctr	noSig	LOC101736677
412	KWMTBOMO00412	-0.019	0.009	-1.044	3.51e-01	6.90e-01	-6.952	L5D3_OR_VS_L5D3_Ctr	noSig	LOC101736942
413	KWMTBOMO00413	-0.019	0.009	-1.044	3.51e-01	6.90e-01	-6.952	L5D3_OR_VS_L5D3_Ctr	noSig	NA
414	KWMTBOMO00414	0	0	0	1.00e+00	1.00e+00	-7.548	L5D3_OR_VS_L5D3_Ctr	noSig	NA
415	KWMTBOMO00415	0	0	0	1.00e+00	1.00e+00	-7.548	L5D3_OR_VS_L5D3_Ctr	noSig	LOC101736770
416	KWMTBOMO00416	0	0	0	1.00e+00	1.00e+00	-7.548	L5D3_OR_VS_L5D3_Ctr	noSig	NA
417	KWMTBOMO00417	0	0	0	1.00e+00	1.00e+00	-7.548	L5D3_OR_VS_L5D3_Ctr	noSig	LOC101736898
418	KWMTBOMO00418	0	0	0	1.00e+00	1.00e+00	-7.548	L5D3_OR_VS_L5D3_Ctr	noSig	NA
419	KWMTBOMO00419	0	0	0	1.00e+00	1.00e+00	-7.548	L5D3_OR_VS_L5D3_Ctr	noSig	NA
420	KWMTBOMO00420	-0.019	0.028	-0.935	3.98e-01	7.37e-01	-7.06	L5D3_OR_VS_L5D3_Ctr	noSig	LOC110385027
421	KWMTBOMO00421	0	0	0	1.00e+00	1.00e+00	-7.548	L5D3_OR_VS_L5D3_Ctr	noSig	LOC101737027
422	KWMTBOMO00422	0	0	0	1.00e+00	1.00e+00	-7.548	L5D3_OR_VS_L5D3_Ctr	noSig	Fln
423	KWMTBOMO00423	0	0	0	1.00e+00	1.00e+00	-7.548	L5D3_OR_VS_L5D3_Ctr	noSig	NA
424	KWMTBOMO00424	0	0	0	1.00e+00	1.00e+00	-7.548	L5D3_OR_VS_L5D3_Ctr	noSig	LOC110385851
425	KWMTBOMO00425	0.375	2.11	1.88	1.27e-01	4.27e-01	-5.961	L5D3_OR_VS_L5D3_Ctr	noSig	LOC101737163
426	KWMTBOMO00426	-1.757	2.712	-7.113	1.44e-03	3.20e-02	-0.818	L5D3_OR_VS_L5D3_Ctr	down	Per
427	KWMTBOMO00427	-0.768	5.752	-3.143	3.06e-02	1.78e-01	-4.388	L5D3_OR_VS_L5D3_Ctr	noSig	Copg1
428	KWMTBOMO00428	-0.515	0.601	-2.409	6.80e-02	2.97e-01	-5.287	L5D3_OR_VS_L5D3_Ctr	noSig	LOC101737214
429	KWMTBOMO00429	0	0	0	1.00e+00	1.00e+00	-7.548	L5D3_OR_VS_L5D3_Ctr	noSig	NA
430	KWMTBOMO00430	-0.187	0.194	-1.129	3.17e-01	6.90e-01	-6.863	L5D3_OR_VS_L5D3_Ctr	noSig	NA
431	KWMTBOMO00431	0.023	0.012	1.045	3.50e-01	6.90e-01	-6.951	L5D3_OR_VS_L5D3_Ctr	noSig	NA
432	KWMTBOMO00432	-0.051	0.054	-3.155	3.02e-02	1.76e-01	-4.373	L5D3_OR_VS_L5D3_Ctr	noSig	NA
433	KWMTBOMO00433	0.023	0.012	1.045	3.50e-01	6.90e-01	-6.951	L5D3_OR_VS_L5D3_Ctr	noSig	NA
434	KWMTBOMO00434	-0.023	0.08	-0.373	7.26e-01	1.00e+00	-7.464	L5D3_OR_VS_L5D3_Ctr	noSig	NA
435	KWMTBOMO00435	0.152	2.666	0.891	4.19e-01	7.62e-01	-7.101	L5D3_OR_VS_L5D3_Ctr	noSig	LOC101737506
436	KWMTBOMO00436	-0.019	0.014	-0.815	4.57e-01	8.07e-01	-7.169	L5D3_OR_VS_L5D3_Ctr	noSig	NA
437	KWMTBOMO00437	-0.007	2.095	-0.025	9.81e-01	1.00e+00	-7.547	L5D3_OR_VS_L5D3_Ctr	noSig	LOC101737828
438	KWMTBOMO00438	-1.002	2.896	-5.114	5.37e-03	6.24e-02	-2.364	L5D3_OR_VS_L5D3_Ctr	noSig	LOC101737959
439	KWMTBOMO00439	-0.682	3.982	-2.243	8.24e-02	3.36e-01	-5.498	L5D3_OR_VS_L5D3_Ctr	noSig	LOC101737920
440	KWMTBOMO00440	0	0	0	1.00e+00	1.00e+00	-7.548	L5D3_OR_VS_L5D3_Ctr	noSig	NA
441	KWMTBOMO00441	0	0	0	1.00e+00	1.00e+00	-7.548	L5D3_OR_VS_L5D3_Ctr	noSig	NA
442	KWMTBOMO00442	0.059	0.029	1.047	3.49e-01	6.90e-01	-6.949	L5D3_OR_VS_L5D3_Ctr	noSig	LOC101738221
443	KWMTBOMO00443	0	0	0	1.00e+00	1.00e+00	-7.548	L5D3_OR_VS_L5D3_Ctr	noSig	LOC101738052
444	KWMTBOMO00444	-0.134	0.597	-1.071	3.40e-01	6.90e-01	-6.924	L5D3_OR_VS_L5D3_Ctr	noSig	LOC101738179
445	KWMTBOMO00445	0.049	0.211	0.421	6.94e-01	1.00e+00	-7.441	L5D3_OR_VS_L5D3_Ctr	noSig	NA
446	KWMTBOMO00446	-0.101	0.083	-1.395	2.30e-01	6.14e-01	-6.562	L5D3_OR_VS_L5D3_Ctr	noSig	NA
447	KWMTBOMO00447	-0.038	0.061	-0.445	6.77e-01	1.00e+00	-7.429	L5D3_OR_VS_L5D3_Ctr	noSig	LOC101738304
448	KWMTBOMO00448	-1.108	0.689	-7.727	1.03e-03	2.75e-02	-0.42	L5D3_OR_VS_L5D3_Ctr	down	NA
449	KWMTBOMO00449	0.019	0.009	1.044	3.51e-01	6.90e-01	-6.952	L5D3_OR_VS_L5D3_Ctr	noSig	LOC105841794
450	KWMTBOMO00450	-0.24	0.227	-0.834	4.47e-01	7.95e-01	-7.152	L5D3_OR_VS_L5D3_Ctr	noSig	LOC105842723
451	KWMTBOMO00451	-1.141	1.89	-4.293	1.04e-02	9.11e-02	-3.136	L5D3_OR_VS_L5D3_Ctr	noSig	LOC105842806
452	KWMTBOMO00452	0	0	0	1.00e+00	1.00e+00	-7.548	L5D3_OR_VS_L5D3_Ctr	noSig	LOC110386941
453	KWMTBOMO00453	-0.027	0.06	-0.566	5.99e-01	9.60e-01	-7.358	L5D3_OR_VS_L5D3_Ctr	noSig	NA
454	KWMTBOMO00454	-0.201	0.148	-2.175	8.92e-02	3.52e-01	-5.584	L5D3_OR_VS_L5D3_Ctr	noSig	LOC101738169
455	KWMTBOMO00455	-0.645	1.105	-1.745	1.50e-01	4.73e-01	-6.133	L5D3_OR_VS_L5D3_Ctr	noSig	NA
456	KWMTBOMO00456	-0.05	0.103	-0.915	4.08e-01	7.49e-01	-7.079	L5D3_OR_VS_L5D3_Ctr	noSig	NA
457	KWMTBOMO00457	-0.079	0.631	-0.467	6.63e-01	1.00e+00	-7.417	L5D3_OR_VS_L5D3_Ctr	noSig	LOC101737254
458	KWMTBOMO00458	-0.035	0.041	-0.584	5.88e-01	9.48e-01	-7.346	L5D3_OR_VS_L5D3_Ctr	noSig	croc
459	KWMTBOMO00459	0.493	1.317	0.951	3.91e-01	7.28e-01	-7.045	L5D3_OR_VS_L5D3_Ctr	noSig	LOC105841766
460	KWMTBOMO00460	0.254	2.682	0.58	5.90e-01	9.51e-01	-7.349	L5D3_OR_VS_L5D3_Ctr	noSig	LOC101737109
461	KWMTBOMO00461	-0.184	2.005	-1.113	3.23e-01	6.90e-01	-6.88	L5D3_OR_VS_L5D3_Ctr	noSig	LOC732911
462	KWMTBOMO00462	-0.116	8.874	-0.378	7.23e-01	1.00e+00	-7.462	L5D3_OR_VS_L5D3_Ctr	noSig	Tudor-SN
463	KWMTBOMO00463	0.082	1.148	0.469	6.62e-01	1.00e+00	-7.416	L5D3_OR_VS_L5D3_Ctr	noSig	LOC101736715
464	KWMTBOMO00464	-0.072	1.281	-0.179	8.66e-01	1.00e+00	-7.528	L5D3_OR_VS_L5D3_Ctr	noSig	LOC101736230
465	KWMTBOMO00465	-0.871	1.877	-4.403	9.45e-03	8.66e-02	-3.027	L5D3_OR_VS_L5D3_Ctr	noSig	LOC101736095
466	KWMTBOMO00466	0	0	0	1.00e+00	1.00e+00	-7.548	L5D3_OR_VS_L5D3_Ctr	noSig	LOC101735879
467	KWMTBOMO00467	0	0	0	1.00e+00	1.00e+00	-7.548	L5D3_OR_VS_L5D3_Ctr	noSig	LOC101737634
468	KWMTBOMO00468	0	0	0	1.00e+00	1.00e+00	-7.548	L5D3_OR_VS_L5D3_Ctr	noSig	LOC101745339
469	KWMTBOMO00469	0.164	0.621	0.625	5.63e-01	9.21e-01	-7.318	L5D3_OR_VS_L5D3_Ctr	noSig	LOC105841861
470	KWMTBOMO00470	-0.005	0.017	-0.385	7.18e-01	1.00e+00	-7.458	L5D3_OR_VS_L5D3_Ctr	noSig	NA
471	KWMTBOMO00471	-0.787	0.671	-2.677	5.03e-02	2.46e-01	-4.951	L5D3_OR_VS_L5D3_Ctr	noSig	NA
472	KWMTBOMO00472	-0.286	0.757	-1.521	1.97e-01	5.56e-01	-6.411	L5D3_OR_VS_L5D3_Ctr	noSig	LOC101739761
473	KWMTBOMO00473	-0.415	5.779	-1.829	1.35e-01	4.44e-01	-6.026	L5D3_OR_VS_L5D3_Ctr	noSig	LOC733113
474	KWMTBOMO00474	-0.492	0.889	-2.279	7.90e-02	3.27e-01	-5.453	L5D3_OR_VS_L5D3_Ctr	noSig	LOC101739895
475	KWMTBOMO00475	0	0	0	1.00e+00	1.00e+00	-7.548	L5D3_OR_VS_L5D3_Ctr	noSig	NA
476	KWMTBOMO00476	-0.166	0.561	-1.621	1.74e-01	5.18e-01	-6.288	L5D3_OR_VS_L5D3_Ctr	noSig	LOC101740160
477	KWMTBOMO00477	0.033	0.016	1.046	3.50e-01	6.90e-01	-6.95	L5D3_OR_VS_L5D3_Ctr	noSig	NA
478	KWMTBOMO00478	0.019	0.009	1.044	3.51e-01	6.90e-01	-6.952	L5D3_OR_VS_L5D3_Ctr	noSig	LOC101742079
479	KWMTBOMO00479	-0.557	0.279	-1.942	1.18e-01	4.08e-01	-5.883	L5D3_OR_VS_L5D3_Ctr	noSig	LOC101740302
480	KWMTBOMO00480	0	0	0	1.00e+00	1.00e+00	-7.548	L5D3_OR_VS_L5D3_Ctr	noSig	NA
481	KWMTBOMO00481	0	0	0	1.00e+00	1.00e+00	-7.548	L5D3_OR_VS_L5D3_Ctr	noSig	NA
482	KWMTBOMO00482	-1.501	3.165	-10.817	2.49e-04	1.70e-02	1.21	L5D3_OR_VS_L5D3_Ctr	down	LOC110386707
483	KWMTBOMO00483	0	0	0	1.00e+00	1.00e+00	-7.548	L5D3_OR_VS_L5D3_Ctr	noSig	NA
484	KWMTBOMO00484	0	0	0	1.00e+00	1.00e+00	-7.548	L5D3_OR_VS_L5D3_Ctr	noSig	NA
485	KWMTBOMO00485	0	0	0	1.00e+00	1.00e+00	-7.548	L5D3_OR_VS_L5D3_Ctr	noSig	LOC101742470
486	KWMTBOMO00486	-0.777	4.92	-7.077	1.47e-03	3.24e-02	-0.843	L5D3_OR_VS_L5D3_Ctr	down	LOC101742319
487	KWMTBOMO00487	-0.029	5.816	-0.541	6.15e-01	9.77e-01	-7.374	L5D3_OR_VS_L5D3_Ctr	noSig	LOC692792
488	KWMTBOMO00488	0	0	0	1.00e+00	1.00e+00	-7.548	L5D3_OR_VS_L5D3_Ctr	noSig	Bbx-e1
489	KWMTBOMO00489	0	0	0	1.00e+00	1.00e+00	-7.548	L5D3_OR_VS_L5D3_Ctr	noSig	LOC110386425
490	KWMTBOMO00490	-0.046	0.042	-1.259	2.71e-01	6.80e-01	-6.72	L5D3_OR_VS_L5D3_Ctr	noSig	LOC101742858
491	KWMTBOMO00491	-0.886	3.455	-3.079	3.27e-02	1.85e-01	-4.463	L5D3_OR_VS_L5D3_Ctr	noSig	LOC101742611
492	KWMTBOMO00492	0.038	2.96	0.129	9.03e-01	1.00e+00	-7.537	L5D3_OR_VS_L5D3_Ctr	noSig	LOC101737612
493	KWMTBOMO00493	0	0	0	1.00e+00	1.00e+00	-7.548	L5D3_OR_VS_L5D3_Ctr	noSig	LOC101740847
494	KWMTBOMO00494	0.497	3.703	2.401	6.86e-02	2.98e-01	-5.297	L5D3_OR_VS_L5D3_Ctr	noSig	LOC101740991
495	KWMTBOMO00495	-0.136	0.849	-0.495	6.44e-01	1.00e+00	-7.402	L5D3_OR_VS_L5D3_Ctr	noSig	LOC101740431
496	KWMTBOMO00496	-0.192	0.431	-1.605	1.77e-01	5.25e-01	-6.308	L5D3_OR_VS_L5D3_Ctr	noSig	LOC101743000
497	KWMTBOMO00497	0.194	7.569	0.498	6.43e-01	1.00e+00	-7.4	L5D3_OR_VS_L5D3_Ctr	noSig	LOC101743755
498	KWMTBOMO00498	0.121	0.895	0.745	4.94e-01	8.47e-01	-7.228	L5D3_OR_VS_L5D3_Ctr	noSig	LOC101743521
499	KWMTBOMO00499	-0.959	3.588	-8.664	6.37e-04	2.25e-02	0.134	L5D3_OR_VS_L5D3_Ctr	down	LOC105842703
500	KWMTBOMO00500	-0.207	1.245	-0.592	5.83e-01	9.43e-01	-7.341	L5D3_OR_VS_L5D3_Ctr	noSig	Snf4agamma
501	KWMTBOMO00501	-0.151	1.893	-0.601	5.77e-01	9.37e-01	-7.335	L5D3_OR_VS_L5D3_Ctr	noSig	NA
502	KWMTBOMO00502	-0.188	0.094	-4.799	6.84e-03	7.17e-02	-2.648	L5D3_OR_VS_L5D3_Ctr	noSig	LOC101744006
503	KWMTBOMO00503	-0.055	0.046	-1.21	2.87e-01	6.90e-01	-6.774	L5D3_OR_VS_L5D3_Ctr	noSig	LOC101740699
504	KWMTBOMO00504	0	0	0	1.00e+00	1.00e+00	-7.548	L5D3_OR_VS_L5D3_Ctr	noSig	NA
505	KWMTBOMO00505	0.348	2.844	1.074	3.38e-01	6.90e-01	-6.921	L5D3_OR_VS_L5D3_Ctr	noSig	LOC101744245
506	KWMTBOMO00506	-0.3	0.272	-3.403	2.35e-02	1.50e-01	-4.086	L5D3_OR_VS_L5D3_Ctr	noSig	LOC101744484
507	KWMTBOMO00507	0	0	0	1.00e+00	1.00e+00	-7.548	L5D3_OR_VS_L5D3_Ctr	noSig	LOC101740985
508	KWMTBOMO00508	0	0	0	1.00e+00	1.00e+00	-7.548	L5D3_OR_VS_L5D3_Ctr	noSig	NA
509	KWMTBOMO00509	0	0	0	1.00e+00	1.00e+00	-7.548	L5D3_OR_VS_L5D3_Ctr	noSig	NA
510	KWMTBOMO00510	0	0	0	1.00e+00	1.00e+00	-7.548	L5D3_OR_VS_L5D3_Ctr	noSig	LOC110386423
511	KWMTBOMO00511	0.005	0.002	0.991	3.73e-01	7.05e-01	-7.006	L5D3_OR_VS_L5D3_Ctr	noSig	LOC101741127
512	KWMTBOMO00512	-0.225	2.704	-1.224	2.82e-01	6.90e-01	-6.758	L5D3_OR_VS_L5D3_Ctr	noSig	LOC101744872
513	KWMTBOMO00513	0.08	0.542	0.27	7.99e-01	1.00e+00	-7.503	L5D3_OR_VS_L5D3_Ctr	noSig	LOC101744727
514	KWMTBOMO00514	-0.201	1.238	-0.901	4.14e-01	7.56e-01	-7.092	L5D3_OR_VS_L5D3_Ctr	noSig	LOC101739102
515	KWMTBOMO00515	-0.107	0.167	-0.847	4.41e-01	7.88e-01	-7.141	L5D3_OR_VS_L5D3_Ctr	noSig	NA
516	KWMTBOMO00516	-0.432	1.458	-2.713	4.83e-02	2.39e-01	-4.906	L5D3_OR_VS_L5D3_Ctr	noSig	LOC101741411
517	KWMTBOMO00517	0	0	0	1.00e+00	1.00e+00	-7.548	L5D3_OR_VS_L5D3_Ctr	noSig	NA
518	KWMTBOMO00518	0	0	0	1.00e+00	1.00e+00	-7.548	L5D3_OR_VS_L5D3_Ctr	noSig	LOC101741693
519	KWMTBOMO00519	0	0	0	1.00e+00	1.00e+00	-7.548	L5D3_OR_VS_L5D3_Ctr	noSig	LOC101745203
520	KWMTBOMO00520	-0.778	3.383	-4.982	5.94e-03	6.58e-02	-2.482	L5D3_OR_VS_L5D3_Ctr	noSig	LOC101745353
521	KWMTBOMO00521	-0.528	1.992	-1.887	1.26e-01	4.25e-01	-5.953	L5D3_OR_VS_L5D3_Ctr	noSig	LOC101745497
522	KWMTBOMO00522	-0.128	0.494	-0.662	5.41e-01	8.99e-01	-7.292	L5D3_OR_VS_L5D3_Ctr	noSig	LOC105842568
523	KWMTBOMO00523	0	0	0	1.00e+00	1.00e+00	-7.548	L5D3_OR_VS_L5D3_Ctr	noSig	NA
524	KWMTBOMO00524	0	0	0	1.00e+00	1.00e+00	-7.548	L5D3_OR_VS_L5D3_Ctr	noSig	LOC101745636
525	KWMTBOMO00525	-0.22	2.914	-1.12	3.20e-01	6.90e-01	-6.872	L5D3_OR_VS_L5D3_Ctr	noSig	LOC101745785
526	KWMTBOMO00526	-0.599	1.723	-2.448	6.50e-02	2.90e-01	-5.237	L5D3_OR_VS_L5D3_Ctr	noSig	LOC101745930
527	KWMTBOMO00527	-0.166	4.241	-1.378	2.34e-01	6.21e-01	-6.582	L5D3_OR_VS_L5D3_Ctr	noSig	LOC693096
528	KWMTBOMO00528	0.01	0.005	1.032	3.55e-01	6.90e-01	-6.964	L5D3_OR_VS_L5D3_Ctr	noSig	LOC101741990
529	KWMTBOMO00529	0	0	0	1.00e+00	1.00e+00	-7.548	L5D3_OR_VS_L5D3_Ctr	noSig	LOC101742131
530	KWMTBOMO00530	-0.134	0.138	-1.065	3.42e-01	6.90e-01	-6.93	L5D3_OR_VS_L5D3_Ctr	noSig	LOC101746219
531	KWMTBOMO00531	-0.186	6.525	-2.932	3.81e-02	2.04e-01	-4.639	L5D3_OR_VS_L5D3_Ctr	noSig	LOC101746877
532	KWMTBOMO00532	-1.154	0.794	-9.438	4.45e-04	2.00e-02	0.549	L5D3_OR_VS_L5D3_Ctr	down	LOC101746737
533	KWMTBOMO00533	-0.161	0.725	-0.991	3.73e-01	7.05e-01	-7.005	L5D3_OR_VS_L5D3_Ctr	noSig	LOC110386050
534	KWMTBOMO00534	-0.637	1.106	-3.254	2.73e-02	1.66e-01	-4.257	L5D3_OR_VS_L5D3_Ctr	noSig	LOC100174850
535	KWMTBOMO00535	-1.627	2.065	-5.961	2.94e-03	4.56e-02	-1.657	L5D3_OR_VS_L5D3_Ctr	down	LOC101742281
536	KWMTBOMO00536	0.028	0.014	1.046	3.50e-01	6.90e-01	-6.95	L5D3_OR_VS_L5D3_Ctr	noSig	LOC101742423
537	KWMTBOMO00537	-0.365	1.076	-1.305	2.56e-01	6.57e-01	-6.667	L5D3_OR_VS_L5D3_Ctr	noSig	LOC101742568
538	KWMTBOMO00538	-0.193	0.255	-4.526	8.53e-03	8.18e-02	-2.907	L5D3_OR_VS_L5D3_Ctr	noSig	LOC101742709
539	KWMTBOMO00539	-0.328	3.084	-0.946	3.93e-01	7.31e-01	-7.049	L5D3_OR_VS_L5D3_Ctr	noSig	LOC101743001
540	KWMTBOMO00540	-0.693	0.394	-2.816	4.32e-02	2.21e-01	-4.78	L5D3_OR_VS_L5D3_Ctr	noSig	LOC101743144
541	KWMTBOMO00541	-1.002	0.538	-5.842	3.19e-03	4.68e-02	-1.751	L5D3_OR_VS_L5D3_Ctr	down	NA
542	KWMTBOMO00542	-0.703	1.49	-3.068	3.30e-02	1.86e-01	-4.476	L5D3_OR_VS_L5D3_Ctr	noSig	LOC101735439
543	KWMTBOMO00543	0.189	0.094	1.048	3.49e-01	6.90e-01	-6.948	L5D3_OR_VS_L5D3_Ctr	noSig	LOC101735714
544	KWMTBOMO00544	-0.816	3.851	-4.484	8.83e-03	8.34e-02	-2.948	L5D3_OR_VS_L5D3_Ctr	noSig	LOC101735848
545	KWMTBOMO00545	1.029	1.675	4.561	8.29e-03	8.04e-02	-2.873	L5D3_OR_VS_L5D3_Ctr	noSig	Ldh
546	KWMTBOMO00546	0.038	1.799	0.093	9.30e-01	1.00e+00	-7.542	L5D3_OR_VS_L5D3_Ctr	noSig	NA
547	KWMTBOMO00547	0.005	0.012	0.286	7.88e-01	1.00e+00	-7.498	L5D3_OR_VS_L5D3_Ctr	noSig	NA
548	KWMTBOMO00548	0.374	1.572	1.258	2.71e-01	6.80e-01	-6.721	L5D3_OR_VS_L5D3_Ctr	noSig	LOC101743427
549	KWMTBOMO00549	-1.802	1.874	-9.407	4.51e-04	2.01e-02	0.534	L5D3_OR_VS_L5D3_Ctr	down	LOC101736297
550	KWMTBOMO00550	-0.098	0.835	-0.733	5.01e-01	8.54e-01	-7.238	L5D3_OR_VS_L5D3_Ctr	noSig	LOC101743567
551	KWMTBOMO00551	-0.479	0.963	-2.332	7.43e-02	3.14e-01	-5.385	L5D3_OR_VS_L5D3_Ctr	noSig	LOC101736424
552	KWMTBOMO00552	0.212	1.351	0.554	6.07e-01	9.69e-01	-7.366	L5D3_OR_VS_L5D3_Ctr	noSig	LOC101743708
553	KWMTBOMO00553	-0.139	0.148	-3	3.55e-02	1.94e-01	-4.557	L5D3_OR_VS_L5D3_Ctr	noSig	LOC110386823
554	KWMTBOMO00554	-0.187	0.307	-1.114	3.22e-01	6.90e-01	-6.878	L5D3_OR_VS_L5D3_Ctr	noSig	LOC101743860
555	KWMTBOMO00555	0.037	0.074	0.848	4.40e-01	7.88e-01	-7.14	L5D3_OR_VS_L5D3_Ctr	noSig	LOC101736736
556	KWMTBOMO00556	-0.166	0.674	-0.877	4.26e-01	7.70e-01	-7.114	L5D3_OR_VS_L5D3_Ctr	noSig	LOC101736863
557	KWMTBOMO00557	-0.041	0.248	-0.477	6.56e-01	1.00e+00	-7.412	L5D3_OR_VS_L5D3_Ctr	noSig	NA
558	KWMTBOMO00558	0	0	0	1.00e+00	1.00e+00	-7.548	L5D3_OR_VS_L5D3_Ctr	noSig	LOC110386422
559	KWMTBOMO00559	0.028	0.047	0.726	5.05e-01	8.58e-01	-7.243	L5D3_OR_VS_L5D3_Ctr	noSig	NA
560	KWMTBOMO00560	0.019	0.009	1.575	1.84e-01	5.34e-01	-6.344	L5D3_OR_VS_L5D3_Ctr	noSig	NA
561	KWMTBOMO00561	-0.131	0.149	-1.854	1.31e-01	4.37e-01	-5.995	L5D3_OR_VS_L5D3_Ctr	noSig	NA
562	KWMTBOMO00562	0.008	0.193	0.043	9.68e-01	1.00e+00	-7.547	L5D3_OR_VS_L5D3_Ctr	noSig	LOC101736996
563	KWMTBOMO00563	0.002	0.14	0.022	9.83e-01	1.00e+00	-7.547	L5D3_OR_VS_L5D3_Ctr	noSig	NA
564	KWMTBOMO00564	0	0	0	1.00e+00	1.00e+00	-7.548	L5D3_OR_VS_L5D3_Ctr	noSig	NA
565	KWMTBOMO00565	0	0	0	1.00e+00	1.00e+00	-7.548	L5D3_OR_VS_L5D3_Ctr	noSig	NA
566	KWMTBOMO00566	0	0	0	1.00e+00	1.00e+00	-7.548	L5D3_OR_VS_L5D3_Ctr	noSig	LOC101737229
567	KWMTBOMO00567	-0.278	0.388	-0.978	3.79e-01	7.12e-01	-7.018	L5D3_OR_VS_L5D3_Ctr	noSig	LOC101744007
568	KWMTBOMO00568	-0.485	5.062	-4.736	7.19e-03	7.35e-02	-2.707	L5D3_OR_VS_L5D3_Ctr	noSig	LOC101744151
569	KWMTBOMO00569	-0.019	0.019	-1.041	3.52e-01	6.90e-01	-6.955	L5D3_OR_VS_L5D3_Ctr	noSig	NGR-B2
570	KWMTBOMO00570	-0.859	1.915	-3.493	2.15e-02	1.43e-01	-3.984	L5D3_OR_VS_L5D3_Ctr	noSig	NA
571	KWMTBOMO00571	-0.055	0.046	-1.21	2.87e-01	6.90e-01	-6.774	L5D3_OR_VS_L5D3_Ctr	noSig	LOC101738639
572	KWMTBOMO00572	0.064	0.614	0.466	6.64e-01	1.00e+00	-7.418	L5D3_OR_VS_L5D3_Ctr	noSig	LOC105842503
573	KWMTBOMO00573	0.028	0.014	1.046	3.50e-01	6.90e-01	-6.95	L5D3_OR_VS_L5D3_Ctr	noSig	LOC101737608
574	KWMTBOMO00574	0.52	4.952	0.985	3.76e-01	7.09e-01	-7.012	L5D3_OR_VS_L5D3_Ctr	noSig	LOC101737749
575	KWMTBOMO00575	0.917	4.284	1.631	1.72e-01	5.14e-01	-6.276	L5D3_OR_VS_L5D3_Ctr	noSig	NA
576	KWMTBOMO00576	1.12	4.349	1.866	1.29e-01	4.32e-01	-5.98	L5D3_OR_VS_L5D3_Ctr	noSig	LOC101745012
577	KWMTBOMO00577	-0.045	0.07	-1.271	2.67e-01	6.74e-01	-6.706	L5D3_OR_VS_L5D3_Ctr	noSig	NA
578	KWMTBOMO00578	1.152	3.759	1.928	1.20e-01	4.13e-01	-5.901	L5D3_OR_VS_L5D3_Ctr	noSig	NA
579	KWMTBOMO00579	-0.046	0.051	-1.181	2.98e-01	6.90e-01	-6.806	L5D3_OR_VS_L5D3_Ctr	noSig	LOC101737885
580	KWMTBOMO00580	-0.195	0.597	-0.954	3.90e-01	7.27e-01	-7.042	L5D3_OR_VS_L5D3_Ctr	noSig	LOC101738019
581	KWMTBOMO00581	0.019	0.009	1.044	3.51e-01	6.90e-01	-6.952	L5D3_OR_VS_L5D3_Ctr	noSig	LOC101738235
582	KWMTBOMO00582	-0.579	0.838	-5.922	3.02e-03	4.60e-02	-1.688	L5D3_OR_VS_L5D3_Ctr	down	LOC101745161
583	KWMTBOMO00583	-0.312	0.293	-1.888	1.26e-01	4.25e-01	-5.952	L5D3_OR_VS_L5D3_Ctr	noSig	NA
584	KWMTBOMO00584	-0.563	2.193	-1.463	2.11e-01	5.81e-01	-6.481	L5D3_OR_VS_L5D3_Ctr	noSig	LOC101738367
585	KWMTBOMO00585	0	0	0	1.00e+00	1.00e+00	-7.548	L5D3_OR_VS_L5D3_Ctr	noSig	LOC101745307
586	KWMTBOMO00586	0	0	0	1.00e+00	1.00e+00	-7.548	L5D3_OR_VS_L5D3_Ctr	noSig	NA
587	KWMTBOMO00587	-0.022	0.035	-0.455	6.71e-01	1.00e+00	-7.424	L5D3_OR_VS_L5D3_Ctr	noSig	LOC101738771
588	KWMTBOMO00588	-0.071	2.28	-0.238	8.23e-01	1.00e+00	-7.513	L5D3_OR_VS_L5D3_Ctr	noSig	LOC101739053
589	KWMTBOMO00589	-0.652	2.048	-2.002	1.10e-01	3.90e-01	-5.807	L5D3_OR_VS_L5D3_Ctr	noSig	LOC101745447
590	KWMTBOMO00590	-0.275	1.866	-1.097	3.29e-01	6.90e-01	-6.897	L5D3_OR_VS_L5D3_Ctr	noSig	LOC692752
591	KWMTBOMO00591	0.197	4.041	0.451	6.73e-01	1.00e+00	-7.426	L5D3_OR_VS_L5D3_Ctr	noSig	LOC101739199
592	KWMTBOMO00592	-0.346	5.775	-3.334	2.52e-02	1.57e-01	-4.166	L5D3_OR_VS_L5D3_Ctr	noSig	LOC100302108
593	KWMTBOMO00593	0	0	0	1.00e+00	1.00e+00	-7.548	L5D3_OR_VS_L5D3_Ctr	noSig	LOC101745591
594	KWMTBOMO00594	0	0	0	1.00e+00	1.00e+00	-7.548	L5D3_OR_VS_L5D3_Ctr	noSig	LOC101745743
595	KWMTBOMO00595	0	0	0	1.00e+00	1.00e+00	-7.548	L5D3_OR_VS_L5D3_Ctr	noSig	LOC105842554
596	KWMTBOMO00596	-0.026	0.046	-0.409	7.02e-01	1.00e+00	-7.447	L5D3_OR_VS_L5D3_Ctr	noSig	NA
597	KWMTBOMO00597	0	0	0	1.00e+00	1.00e+00	-7.548	L5D3_OR_VS_L5D3_Ctr	noSig	LOC101739338
598	KWMTBOMO00598	-0.033	0.035	-2.196	8.70e-02	3.47e-01	-5.558	L5D3_OR_VS_L5D3_Ctr	noSig	NA
599	KWMTBOMO00599	0	0	0	1.00e+00	1.00e+00	-7.548	L5D3_OR_VS_L5D3_Ctr	noSig	LOC101746024
600	KWMTBOMO00600	0	0	0	1.00e+00	1.00e+00	-7.548	L5D3_OR_VS_L5D3_Ctr	noSig	LOC101746166
601	KWMTBOMO00601	-0.023	0.217	-0.353	7.40e-01	1.00e+00	-7.472	L5D3_OR_VS_L5D3_Ctr	noSig	NA
602	KWMTBOMO00602	-0.005	0.021	-0.197	8.53e-01	1.00e+00	-7.524	L5D3_OR_VS_L5D3_Ctr	noSig	NA
603	KWMTBOMO00603	0	0	0	1.00e+00	1.00e+00	-7.548	L5D3_OR_VS_L5D3_Ctr	noSig	NA
604	KWMTBOMO00604	0	0	0	1.00e+00	1.00e+00	-7.548	L5D3_OR_VS_L5D3_Ctr	noSig	NA
605	KWMTBOMO00605	0.062	0.069	1.282	2.63e-01	6.68e-01	-6.693	L5D3_OR_VS_L5D3_Ctr	noSig	LOC101739482
606	KWMTBOMO00606	-0.459	3.243	-1.474	2.08e-01	5.76e-01	-6.468	L5D3_OR_VS_L5D3_Ctr	noSig	LOC101739618
607	KWMTBOMO00607	0.083	2.662	0.244	8.18e-01	1.00e+00	-7.512	L5D3_OR_VS_L5D3_Ctr	noSig	NA
608	KWMTBOMO00608	0	0	0	1.00e+00	1.00e+00	-7.548	L5D3_OR_VS_L5D3_Ctr	noSig	LOC105841445
609	KWMTBOMO00609	0	0	0	1.00e+00	1.00e+00	-7.548	L5D3_OR_VS_L5D3_Ctr	noSig	NA
610	KWMTBOMO00610	0.014	0.007	1.041	3.52e-01	6.90e-01	-6.955	L5D3_OR_VS_L5D3_Ctr	noSig	LOC105841448
611	KWMTBOMO00611	0.092	0.26	0.39	7.15e-01	1.00e+00	-7.456	L5D3_OR_VS_L5D3_Ctr	noSig	NA
612	KWMTBOMO00612	0.033	0.031	1.26	2.70e-01	6.79e-01	-6.718	L5D3_OR_VS_L5D3_Ctr	noSig	NA
613	KWMTBOMO00613	0	0	0	1.00e+00	1.00e+00	-7.548	L5D3_OR_VS_L5D3_Ctr	noSig	NA
614	KWMTBOMO00614	0.014	0.007	1.041	3.52e-01	6.90e-01	-6.955	L5D3_OR_VS_L5D3_Ctr	noSig	LOC101745029
615	KWMTBOMO00615	-0.085	0.066	-1.582	1.82e-01	5.32e-01	-6.336	L5D3_OR_VS_L5D3_Ctr	noSig	NA
616	KWMTBOMO00616	-0.046	0.11	-0.942	3.95e-01	7.33e-01	-7.053	L5D3_OR_VS_L5D3_Ctr	noSig	NA
617	KWMTBOMO00617	-0.703	2.24	-7.507	1.16e-03	2.87e-02	-0.559	L5D3_OR_VS_L5D3_Ctr	down	LOC101744889
618	KWMTBOMO00618	0.012	0.617	0.088	9.34e-01	1.00e+00	-7.543	L5D3_OR_VS_L5D3_Ctr	noSig	NA
619	KWMTBOMO00619	-0.136	0.967	-0.631	5.59e-01	9.18e-01	-7.314	L5D3_OR_VS_L5D3_Ctr	noSig	LOC101746464
620	KWMTBOMO00620	0.971	1.515	2.348	7.29e-02	3.10e-01	-5.364	L5D3_OR_VS_L5D3_Ctr	noSig	LOC101744744
621	KWMTBOMO00621	-0.914	2.376	-4.899	6.33e-03	6.88e-02	-2.557	L5D3_OR_VS_L5D3_Ctr	noSig	LOC101744602
622	KWMTBOMO00622	0.083	0.041	1.83	1.35e-01	4.43e-01	-6.025	L5D3_OR_VS_L5D3_Ctr	noSig	LOC105841444
623	KWMTBOMO00623	-0.281	1.276	-0.736	4.99e-01	8.53e-01	-7.235	L5D3_OR_VS_L5D3_Ctr	noSig	LOC101746325
624	KWMTBOMO00624	0	0	0	1.00e+00	1.00e+00	-7.548	L5D3_OR_VS_L5D3_Ctr	noSig	LOC101744456
625	KWMTBOMO00625	-0.023	0.059	-1.648	1.68e-01	5.07e-01	-6.255	L5D3_OR_VS_L5D3_Ctr	noSig	NA
626	KWMTBOMO00626	0	0	0	1.00e+00	1.00e+00	-7.548	L5D3_OR_VS_L5D3_Ctr	noSig	NA
627	KWMTBOMO00627	-0.013	1.799	-0.026	9.81e-01	1.00e+00	-7.547	L5D3_OR_VS_L5D3_Ctr	noSig	LOC101744218
628	KWMTBOMO00628	0	0	0	1.00e+00	1.00e+00	-7.548	L5D3_OR_VS_L5D3_Ctr	noSig	LOC101746038
629	KWMTBOMO00629	0	0	0	1.00e+00	1.00e+00	-7.548	L5D3_OR_VS_L5D3_Ctr	noSig	NA
630	KWMTBOMO00630	0.019	0.009	1.044	3.51e-01	6.90e-01	-6.952	L5D3_OR_VS_L5D3_Ctr	noSig	NA
631	KWMTBOMO00631	-0.221	0.781	-1.242	2.76e-01	6.90e-01	-6.738	L5D3_OR_VS_L5D3_Ctr	noSig	LOC101743877
632	KWMTBOMO00632	-0.155	0.106	-3.155	3.02e-02	1.76e-01	-4.373	L5D3_OR_VS_L5D3_Ctr	noSig	NA
633	KWMTBOMO00633	0.04	0.383	0.139	8.96e-01	1.00e+00	-7.536	L5D3_OR_VS_L5D3_Ctr	noSig	NA
634	KWMTBOMO00634	-1.287	2.078	-7.07	1.48e-03	3.24e-02	-0.848	L5D3_OR_VS_L5D3_Ctr	down	NA
635	KWMTBOMO00635	0	0	0	1.00e+00	1.00e+00	-7.548	L5D3_OR_VS_L5D3_Ctr	noSig	NA
636	KWMTBOMO00636	-0.761	5.155	-3.531	2.08e-02	1.40e-01	-3.943	L5D3_OR_VS_L5D3_Ctr	noSig	LOC105841453
637	KWMTBOMO00637	-0.366	6.947	-1.188	2.95e-01	6.90e-01	-6.799	L5D3_OR_VS_L5D3_Ctr	noSig	NA
638	KWMTBOMO00638	-0.275	6.799	-0.747	4.93e-01	8.47e-01	-7.227	L5D3_OR_VS_L5D3_Ctr	noSig	COPB2
639	KWMTBOMO00639	-1.085	3.022	-3.111	3.16e-02	1.81e-01	-4.426	L5D3_OR_VS_L5D3_Ctr	noSig	LOC101745755
640	KWMTBOMO00640	-0.283	3.017	-0.997	3.71e-01	7.05e-01	-7	L5D3_OR_VS_L5D3_Ctr	noSig	LOC101743586
641	KWMTBOMO00641	-0.188	1.246	-0.579	5.91e-01	9.52e-01	-7.35	L5D3_OR_VS_L5D3_Ctr	noSig	LOC105841451
642	KWMTBOMO00642	0	0	0	1.00e+00	1.00e+00	-7.548	L5D3_OR_VS_L5D3_Ctr	noSig	NGR-A18
643	KWMTBOMO00643	0.096	0.833	0.337	7.51e-01	1.00e+00	-7.479	L5D3_OR_VS_L5D3_Ctr	noSig	NA
644	KWMTBOMO00644	0.061	0.03	3.472	2.20e-02	1.44e-01	-4.009	L5D3_OR_VS_L5D3_Ctr	noSig	os
645	KWMTBOMO00645	-0.408	0.204	-2.049	1.04e-01	3.77e-01	-5.746	L5D3_OR_VS_L5D3_Ctr	noSig	NA
646	KWMTBOMO00646	0	0	0	1.00e+00	1.00e+00	-7.548	L5D3_OR_VS_L5D3_Ctr	noSig	LOC101743217
647	KWMTBOMO00647	0	0	0	1.00e+00	1.00e+00	-7.548	L5D3_OR_VS_L5D3_Ctr	noSig	NA
648	KWMTBOMO00648	0	0	0	1.00e+00	1.00e+00	-7.548	L5D3_OR_VS_L5D3_Ctr	noSig	NA
649	KWMTBOMO00649	0	0	0	1.00e+00	1.00e+00	-7.548	L5D3_OR_VS_L5D3_Ctr	noSig	LOC101742678
650	KWMTBOMO00650	0	0	0	1.00e+00	1.00e+00	-7.548	L5D3_OR_VS_L5D3_Ctr	noSig	PAH
651	KWMTBOMO00651	-1.038	3.677	-5.743	3.41e-03	4.88e-02	-1.831	L5D3_OR_VS_L5D3_Ctr	down	Awh
652	KWMTBOMO00652	-0.102	0.334	-0.715	5.11e-01	8.65e-01	-7.252	L5D3_OR_VS_L5D3_Ctr	noSig	LOC101745607
653	KWMTBOMO00653	-0.044	0.074	-0.467	6.63e-01	1.00e+00	-7.418	L5D3_OR_VS_L5D3_Ctr	noSig	LOC110385516
654	KWMTBOMO00654	-0.441	0.957	-2.527	5.94e-02	2.72e-01	-5.138	L5D3_OR_VS_L5D3_Ctr	noSig	Cycb
655	KWMTBOMO00655	0.389	3.795	0.648	5.49e-01	9.06e-01	-7.302	L5D3_OR_VS_L5D3_Ctr	noSig	LOC100101168
656	KWMTBOMO00656	0	0	0	1.00e+00	1.00e+00	-7.548	L5D3_OR_VS_L5D3_Ctr	noSig	NA
657	KWMTBOMO00657	-0.022	0.048	-0.328	7.58e-01	1.00e+00	-7.483	L5D3_OR_VS_L5D3_Ctr	noSig	LOC101742534
658	KWMTBOMO00658	-0.172	0.086	-1.048	3.49e-01	6.90e-01	-6.948	L5D3_OR_VS_L5D3_Ctr	noSig	LOC101735489
659	KWMTBOMO00659	-0.167	0.166	-3.113	3.15e-02	1.81e-01	-4.423	L5D3_OR_VS_L5D3_Ctr	noSig	NA
660	KWMTBOMO00660	-0.255	5.542	-0.741	4.96e-01	8.50e-01	-7.231	L5D3_OR_VS_L5D3_Ctr	noSig	LOC101742096
661	KWMTBOMO00661	0.77	1.385	3.509	2.12e-02	1.41e-01	-3.967	L5D3_OR_VS_L5D3_Ctr	noSig	LOC101741858
662	KWMTBOMO00662	-0.046	0.023	-1.047	3.49e-01	6.90e-01	-6.949	L5D3_OR_VS_L5D3_Ctr	noSig	LOC101741710
663	KWMTBOMO00663	0	0	0	1.00e+00	1.00e+00	-7.548	L5D3_OR_VS_L5D3_Ctr	noSig	LOC101741565
664	KWMTBOMO00664	0.028	0.014	1.046	3.50e-01	6.90e-01	-6.95	L5D3_OR_VS_L5D3_Ctr	noSig	LOC101745324
665	KWMTBOMO00665	0	0	0	1.00e+00	1.00e+00	-7.548	L5D3_OR_VS_L5D3_Ctr	noSig	Or-3
666	KWMTBOMO00666	-0.045	0.036	-0.772	4.80e-01	8.32e-01	-7.206	L5D3_OR_VS_L5D3_Ctr	noSig	NA
667	KWMTBOMO00667	-0.388	0.236	-1.331	2.48e-01	6.42e-01	-6.637	L5D3_OR_VS_L5D3_Ctr	noSig	NA
668	KWMTBOMO00668	0.026	0.087	0.41	7.01e-01	1.00e+00	-7.447	L5D3_OR_VS_L5D3_Ctr	noSig	LOC110385823
669	KWMTBOMO00669	0.014	0.007	1.041	3.52e-01	6.90e-01	-6.955	L5D3_OR_VS_L5D3_Ctr	noSig	LOC101742877
670	KWMTBOMO00670	0	0	0	1.00e+00	1.00e+00	-7.548	L5D3_OR_VS_L5D3_Ctr	noSig	LOC101742726
671	KWMTBOMO00671	-0.341	1.757	-1.429	2.20e-01	5.96e-01	-6.522	L5D3_OR_VS_L5D3_Ctr	noSig	LOC101735501
672	KWMTBOMO00672	-0.412	0.498	-3.669	1.82e-02	1.29e-01	-3.789	L5D3_OR_VS_L5D3_Ctr	noSig	LOC110386603
673	KWMTBOMO00673	0.014	0.007	1.041	3.52e-01	6.90e-01	-6.955	L5D3_OR_VS_L5D3_Ctr	noSig	LOC101747166
674	KWMTBOMO00674	0	0.01	0	1.00e+00	1.00e+00	-7.548	L5D3_OR_VS_L5D3_Ctr	noSig	NA
675	KWMTBOMO00675	0	0	0	1.00e+00	1.00e+00	-7.548	L5D3_OR_VS_L5D3_Ctr	noSig	NA
676	KWMTBOMO00676	0.137	1.948	1.01	3.65e-01	7.02e-01	-6.987	L5D3_OR_VS_L5D3_Ctr	noSig	LOC101747027
677	KWMTBOMO00677	-0.358	3.294	-1.394	2.30e-01	6.14e-01	-6.564	L5D3_OR_VS_L5D3_Ctr	noSig	LOC101742491
678	KWMTBOMO00678	-0.426	4.172	-1.197	2.92e-01	6.90e-01	-6.788	L5D3_OR_VS_L5D3_Ctr	noSig	LOC101746894
679	KWMTBOMO00679	0.066	4.944	0.23	8.28e-01	1.00e+00	-7.515	L5D3_OR_VS_L5D3_Ctr	noSig	NA
680	KWMTBOMO00680	-0.009	5.183	-0.026	9.81e-01	1.00e+00	-7.547	L5D3_OR_VS_L5D3_Ctr	noSig	LOC101742339
681	KWMTBOMO00681	-0.464	1.646	-3.002	3.54e-02	1.94e-01	-4.555	L5D3_OR_VS_L5D3_Ctr	noSig	LOC101742200
682	KWMTBOMO00682	0	0	0	1.00e+00	1.00e+00	-7.548	L5D3_OR_VS_L5D3_Ctr	noSig	LOC101746751
683	KWMTBOMO00683	0	0	0	1.00e+00	1.00e+00	-7.548	L5D3_OR_VS_L5D3_Ctr	noSig	LOC101742051
684	KWMTBOMO00684	0	0	0	1.00e+00	1.00e+00	-7.548	L5D3_OR_VS_L5D3_Ctr	noSig	LOC101746611
685	KWMTBOMO00685	0	0	0	1.00e+00	1.00e+00	-7.548	L5D3_OR_VS_L5D3_Ctr	noSig	NA
686	KWMTBOMO00686	-0.617	2.401	-1.634	1.71e-01	5.13e-01	-6.272	L5D3_OR_VS_L5D3_Ctr	noSig	LOC101746465
687	KWMTBOMO00687	0.282	8.603	1.622	1.74e-01	5.18e-01	-6.286	L5D3_OR_VS_L5D3_Ctr	noSig	LOC101738423
688	KWMTBOMO00688	0.689	1.902	2.278	7.90e-02	3.27e-01	-5.453	L5D3_OR_VS_L5D3_Ctr	noSig	LOC101741660
689	KWMTBOMO00689	-0.031	3.193	-0.106	9.20e-01	1.00e+00	-7.541	L5D3_OR_VS_L5D3_Ctr	noSig	LOC101741519
690	KWMTBOMO00690	-0.005	0.002	-0.991	3.73e-01	7.05e-01	-7.006	L5D3_OR_VS_L5D3_Ctr	noSig	NA
691	KWMTBOMO00691	0	0	0	1.00e+00	1.00e+00	-7.548	L5D3_OR_VS_L5D3_Ctr	noSig	NA
692	KWMTBOMO00692	0	0	0	1.00e+00	1.00e+00	-7.548	L5D3_OR_VS_L5D3_Ctr	noSig	NA
693	KWMTBOMO00693	0	0	0	1.00e+00	1.00e+00	-7.548	L5D3_OR_VS_L5D3_Ctr	noSig	LOC101741243
694	KWMTBOMO00694	-0.243	0.329	-1.394	2.30e-01	6.14e-01	-6.564	L5D3_OR_VS_L5D3_Ctr	noSig	LOC101746326
695	KWMTBOMO00695	-0.567	4.639	-2.212	8.54e-02	3.43e-01	-5.537	L5D3_OR_VS_L5D3_Ctr	noSig	LOC101746182
696	KWMTBOMO00696	0	0.08	0	1.00e+00	1.00e+00	-7.548	L5D3_OR_VS_L5D3_Ctr	noSig	LOC101741103
697	KWMTBOMO00697	-0.235	0.163	-3.229	2.80e-02	1.68e-01	-4.287	L5D3_OR_VS_L5D3_Ctr	noSig	NA
698	KWMTBOMO00698	0.965	0.556	2.772	4.53e-02	2.29e-01	-4.835	L5D3_OR_VS_L5D3_Ctr	noSig	LOC105841470
699	KWMTBOMO00699	-0.629	2.079	-1.683	1.61e-01	4.96e-01	-6.211	L5D3_OR_VS_L5D3_Ctr	noSig	LOC101740962
700	KWMTBOMO00700	-0.358	1.116	-1.167	3.03e-01	6.90e-01	-6.821	L5D3_OR_VS_L5D3_Ctr	noSig	NA
701	KWMTBOMO00701	0	0	0	1.00e+00	1.00e+00	-7.548	L5D3_OR_VS_L5D3_Ctr	noSig	LOC105842336
702	KWMTBOMO00702	-0.091	0.116	-1.593	1.80e-01	5.29e-01	-6.323	L5D3_OR_VS_L5D3_Ctr	noSig	LOC105841553
703	KWMTBOMO00703	0	0	0	1.00e+00	1.00e+00	-7.548	L5D3_OR_VS_L5D3_Ctr	noSig	LOC101746039
704	KWMTBOMO00704	-0.609	7.079	-5.549	3.91e-03	5.26e-02	-1.99	L5D3_OR_VS_L5D3_Ctr	noSig	LOC101740674
705	KWMTBOMO00705	0	0	0	1.00e+00	1.00e+00	-7.548	L5D3_OR_VS_L5D3_Ctr	noSig	NA
706	KWMTBOMO00706	0.046	0.023	1.047	3.49e-01	6.90e-01	-6.949	L5D3_OR_VS_L5D3_Ctr	noSig	LOC101740538
707	KWMTBOMO00707	-0.464	0.751	-2.007	1.09e-01	3.89e-01	-5.8	L5D3_OR_VS_L5D3_Ctr	noSig	LOC101740401
708	KWMTBOMO00708	-0.049	0.09	-0.565	6.00e-01	9.60e-01	-7.359	L5D3_OR_VS_L5D3_Ctr	noSig	LOC101745756
709	KWMTBOMO00709	-0.855	1.333	-2.517	6.01e-02	2.74e-01	-5.151	L5D3_OR_VS_L5D3_Ctr	noSig	LOC101745608
710	KWMTBOMO00710	-0.098	1.582	-0.231	8.28e-01	1.00e+00	-7.515	L5D3_OR_VS_L5D3_Ctr	noSig	Hmg-r
711	KWMTBOMO00711	0.245	3.798	0.526	6.24e-01	9.86e-01	-7.383	L5D3_OR_VS_L5D3_Ctr	noSig	LOC101740183
712	KWMTBOMO00712	-0.551	4.194	-1.947	1.17e-01	4.06e-01	-5.877	L5D3_OR_VS_L5D3_Ctr	noSig	LOC101745746
713	KWMTBOMO00713	0.106	0.805	0.29	7.85e-01	1.00e+00	-7.497	L5D3_OR_VS_L5D3_Ctr	noSig	LOC101740050
714	KWMTBOMO00714	0	0	0	1.00e+00	1.00e+00	-7.548	L5D3_OR_VS_L5D3_Ctr	noSig	LOC101745466
715	KWMTBOMO00715	-0.323	1.169	-1.594	1.80e-01	5.28e-01	-6.322	L5D3_OR_VS_L5D3_Ctr	noSig	NA
716	KWMTBOMO00716	0.041	0.758	0.129	9.03e-01	1.00e+00	-7.537	L5D3_OR_VS_L5D3_Ctr	noSig	LOC101745325
717	KWMTBOMO00717	0	0	0	1.00e+00	1.00e+00	-7.548	L5D3_OR_VS_L5D3_Ctr	noSig	LOC105841465
718	KWMTBOMO00718	-0.166	4.684	-0.437	6.83e-01	1.00e+00	-7.433	L5D3_OR_VS_L5D3_Ctr	noSig	LOC101745030
719	KWMTBOMO00719	-0.077	0.057	-1.562	1.87e-01	5.38e-01	-6.36	L5D3_OR_VS_L5D3_Ctr	noSig	LOC105841466
720	KWMTBOMO00720	-0.122	1.194	-0.358	7.37e-01	1.00e+00	-7.47	L5D3_OR_VS_L5D3_Ctr	noSig	LOC101739914
721	KWMTBOMO00721	-0.182	0.743	-1.091	3.32e-01	6.90e-01	-6.903	L5D3_OR_VS_L5D3_Ctr	noSig	LOC101739777
722	KWMTBOMO00722	0.192	5.097	0.4	7.08e-01	1.00e+00	-7.452	L5D3_OR_VS_L5D3_Ctr	noSig	LOC101739633
723	KWMTBOMO00723	-0.226	1.501	-0.774	4.78e-01	8.31e-01	-7.204	L5D3_OR_VS_L5D3_Ctr	noSig	Pdk
724	KWMTBOMO00724	-0.545	2.236	-2.403	6.84e-02	2.98e-01	-5.294	L5D3_OR_VS_L5D3_Ctr	noSig	LOC101739395
725	KWMTBOMO00725	-1.859	4.337	-8.355	7.41e-04	2.40e-02	-0.042	L5D3_OR_VS_L5D3_Ctr	down	LOC101739259
726	KWMTBOMO00726	0.014	7.593	0.135	8.99e-01	1.00e+00	-7.537	L5D3_OR_VS_L5D3_Ctr	noSig	LOC101739119
727	KWMTBOMO00727	0.13	0.065	2.017	1.08e-01	3.86e-01	-5.787	L5D3_OR_VS_L5D3_Ctr	noSig	LOC101744603
728	KWMTBOMO00728	0	0	0	1.00e+00	1.00e+00	-7.548	L5D3_OR_VS_L5D3_Ctr	noSig	LOC101738971
729	KWMTBOMO00729	0.014	0.137	0.165	8.76e-01	1.00e+00	-7.531	L5D3_OR_VS_L5D3_Ctr	noSig	LOC105841468
730	KWMTBOMO00730	-0.491	4.227	-1.605	1.78e-01	5.25e-01	-6.308	L5D3_OR_VS_L5D3_Ctr	noSig	LOC101738839
731	KWMTBOMO00731	0	0	0	1.00e+00	1.00e+00	-7.548	L5D3_OR_VS_L5D3_Ctr	noSig	itg
732	KWMTBOMO00732	-0.01	0.005	-1.032	3.55e-01	6.90e-01	-6.964	L5D3_OR_VS_L5D3_Ctr	noSig	LOC101738437
733	KWMTBOMO00733	0	0	0	1.00e+00	1.00e+00	-7.548	L5D3_OR_VS_L5D3_Ctr	noSig	LOC101738165
734	KWMTBOMO00734	0	0	0	1.00e+00	1.00e+00	-7.548	L5D3_OR_VS_L5D3_Ctr	noSig	LOC101737906
735	KWMTBOMO00735	0.157	4.394	0.593	5.82e-01	9.42e-01	-7.34	L5D3_OR_VS_L5D3_Ctr	noSig	LOC101737624
736	KWMTBOMO00736	0	0	0	1.00e+00	1.00e+00	-7.548	L5D3_OR_VS_L5D3_Ctr	noSig	LOC101737482
737	KWMTBOMO00737	0	0	0	1.00e+00	1.00e+00	-7.548	L5D3_OR_VS_L5D3_Ctr	noSig	LOC101737055
738	KWMTBOMO00738	0	0	0	1.00e+00	1.00e+00	-7.548	L5D3_OR_VS_L5D3_Ctr	noSig	LOC101736796
739	KWMTBOMO00739	0	0	0	1.00e+00	1.00e+00	-7.548	L5D3_OR_VS_L5D3_Ctr	noSig	LOC101736564
740	KWMTBOMO00740	0	0	0	1.00e+00	1.00e+00	-7.548	L5D3_OR_VS_L5D3_Ctr	noSig	LOC101736313
741	KWMTBOMO00741	0	0	0	1.00e+00	1.00e+00	-7.548	L5D3_OR_VS_L5D3_Ctr	noSig	NA
742	KWMTBOMO00742	0	0	0	1.00e+00	1.00e+00	-7.548	L5D3_OR_VS_L5D3_Ctr	noSig	NA
743	KWMTBOMO00743	-0.014	0.012	-0.755	4.89e-01	8.41e-01	-7.22	L5D3_OR_VS_L5D3_Ctr	noSig	NA
744	KWMTBOMO00744	0	0	0	1.00e+00	1.00e+00	-7.548	L5D3_OR_VS_L5D3_Ctr	noSig	LOC101742977
745	KWMTBOMO00745	0	0	0	1.00e+00	1.00e+00	-7.548	L5D3_OR_VS_L5D3_Ctr	noSig	NA
746	KWMTBOMO00746	0.028	0.033	1.315	2.53e-01	6.52e-01	-6.655	L5D3_OR_VS_L5D3_Ctr	noSig	NA
747	KWMTBOMO00747	-0.155	0.077	-1.048	3.49e-01	6.90e-01	-6.948	L5D3_OR_VS_L5D3_Ctr	noSig	NA
748	KWMTBOMO00748	-0.287	2.002	-1.532	1.94e-01	5.51e-01	-6.397	L5D3_OR_VS_L5D3_Ctr	noSig	LOC101741961
749	KWMTBOMO00749	-0.057	0.165	-0.777	4.77e-01	8.29e-01	-7.202	L5D3_OR_VS_L5D3_Ctr	noSig	NA
750	KWMTBOMO00750	-0.204	3.624	-0.791	4.69e-01	8.20e-01	-7.189	L5D3_OR_VS_L5D3_Ctr	noSig	LOC101745190
751	KWMTBOMO00751	-0.713	8.06	-6.639	1.91e-03	3.62e-02	-1.148	L5D3_OR_VS_L5D3_Ctr	down	Oaz
752	KWMTBOMO00752	0	0	0	1.00e+00	1.00e+00	-7.548	L5D3_OR_VS_L5D3_Ctr	noSig	NA
753	KWMTBOMO00753	0	0	0	1.00e+00	1.00e+00	-7.548	L5D3_OR_VS_L5D3_Ctr	noSig	LOC101740390
754	KWMTBOMO00754	0	0	0	1.00e+00	1.00e+00	-7.548	L5D3_OR_VS_L5D3_Ctr	noSig	LOC101740523
755	KWMTBOMO00755	0	0	0	1.00e+00	1.00e+00	-7.548	L5D3_OR_VS_L5D3_Ctr	noSig	LOC101740664
756	KWMTBOMO00756	0	0	0	1.00e+00	1.00e+00	-7.548	L5D3_OR_VS_L5D3_Ctr	noSig	LOC101739706
757	KWMTBOMO00757	0	0	0	1.00e+00	1.00e+00	-7.548	L5D3_OR_VS_L5D3_Ctr	noSig	LOC101739848
758	KWMTBOMO00758	0	0	0	1.00e+00	1.00e+00	-7.548	L5D3_OR_VS_L5D3_Ctr	noSig	LOC101739985
759	KWMTBOMO00759	0	0	0	1.00e+00	1.00e+00	-7.548	L5D3_OR_VS_L5D3_Ctr	noSig	LOC101740255
760	KWMTBOMO00760	-0.415	4.086	-1.236	2.78e-01	6.90e-01	-6.745	L5D3_OR_VS_L5D3_Ctr	noSig	Era.4
761	KWMTBOMO00761	-0.244	0.173	-3.323	2.55e-02	1.58e-01	-4.178	L5D3_OR_VS_L5D3_Ctr	noSig	Erb.3
762	KWMTBOMO00762	0	0	0	1.00e+00	1.00e+00	-7.548	L5D3_OR_VS_L5D3_Ctr	noSig	Era.1
763	KWMTBOMO00763	0	0	0	1.00e+00	1.00e+00	-7.548	L5D3_OR_VS_L5D3_Ctr	noSig	Erb.2
764	KWMTBOMO00764	0	0	0	1.00e+00	1.00e+00	-7.548	L5D3_OR_VS_L5D3_Ctr	noSig	5h4
765	KWMTBOMO00765	0	0	0	1.00e+00	1.00e+00	-7.548	L5D3_OR_VS_L5D3_Ctr	noSig	LOC101740521
766	KWMTBOMO00766	0	0	0	1.00e+00	1.00e+00	-7.548	L5D3_OR_VS_L5D3_Ctr	noSig	LOC101740806
767	KWMTBOMO00767	0	0	0	1.00e+00	1.00e+00	-7.548	L5D3_OR_VS_L5D3_Ctr	noSig	LOC101740949
768	KWMTBOMO00768	0	0	0	1.00e+00	1.00e+00	-7.548	L5D3_OR_VS_L5D3_Ctr	noSig	Era.5
769	KWMTBOMO00769	0	0	0	1.00e+00	1.00e+00	-7.548	L5D3_OR_VS_L5D3_Ctr	noSig	NA
770	KWMTBOMO00770	0	0	0	1.00e+00	1.00e+00	-7.548	L5D3_OR_VS_L5D3_Ctr	noSig	LOC101742521
771	KWMTBOMO00771	0	0	0	1.00e+00	1.00e+00	-7.548	L5D3_OR_VS_L5D3_Ctr	noSig	LOC101741231
772	KWMTBOMO00772	0	0	0	1.00e+00	1.00e+00	-7.548	L5D3_OR_VS_L5D3_Ctr	noSig	CPH1
773	KWMTBOMO00773	-0.126	1.907	-0.756	4.88e-01	8.41e-01	-7.219	L5D3_OR_VS_L5D3_Ctr	noSig	LOC101742080
774	KWMTBOMO00774	-0.258	0.179	-0.866	4.31e-01	7.77e-01	-7.124	L5D3_OR_VS_L5D3_Ctr	noSig	LOC101743380
775	KWMTBOMO00775	0.01	0.005	1.032	3.55e-01	6.90e-01	-6.964	L5D3_OR_VS_L5D3_Ctr	noSig	LOC101743522
776	KWMTBOMO00776	0.043	1.985	0.116	9.13e-01	1.00e+00	-7.539	L5D3_OR_VS_L5D3_Ctr	noSig	LOC101743658
777	KWMTBOMO00777	0.042	1.043	0.236	8.24e-01	1.00e+00	-7.514	L5D3_OR_VS_L5D3_Ctr	noSig	LOC101743808
778	KWMTBOMO00778	0.096	0.475	0.223	8.34e-01	1.00e+00	-7.517	L5D3_OR_VS_L5D3_Ctr	noSig	NA
779	KWMTBOMO00779	-0.329	0.164	-1.048	3.49e-01	6.90e-01	-6.948	L5D3_OR_VS_L5D3_Ctr	noSig	LOC105842583
780	KWMTBOMO00780	-0.638	2.03	-3.495	2.15e-02	1.42e-01	-3.982	L5D3_OR_VS_L5D3_Ctr	noSig	LOC101742371
781	KWMTBOMO00781	0	0	0	1.00e+00	1.00e+00	-7.548	L5D3_OR_VS_L5D3_Ctr	noSig	NA
782	KWMTBOMO00782	0.257	6.92	4.322	1.01e-02	8.96e-02	-3.107	L5D3_OR_VS_L5D3_Ctr	noSig	LOC101742612
783	KWMTBOMO00783	0.354	5.334	1.647	1.68e-01	5.07e-01	-6.255	L5D3_OR_VS_L5D3_Ctr	noSig	LOC692980
784	KWMTBOMO00784	-0.327	0.534	-1.558	1.88e-01	5.40e-01	-6.366	L5D3_OR_VS_L5D3_Ctr	noSig	LOC101742758
785	KWMTBOMO00785	-0.243	1.866	-1.026	3.58e-01	6.93e-01	-6.97	L5D3_OR_VS_L5D3_Ctr	noSig	LOC101743957
786	KWMTBOMO00786	-0.307	9.72	-1.786	1.42e-01	4.59e-01	-6.081	L5D3_OR_VS_L5D3_Ctr	noSig	LOC693069
787	KWMTBOMO00787	-0.183	0.252	-2.234	8.32e-02	3.38e-01	-5.509	L5D3_OR_VS_L5D3_Ctr	noSig	LOC110386069
788	KWMTBOMO00788	0.208	1.83	0.579	5.91e-01	9.51e-01	-7.35	L5D3_OR_VS_L5D3_Ctr	noSig	gly
789	KWMTBOMO00789	0.244	9.67	1.971	1.14e-01	3.99e-01	-5.846	L5D3_OR_VS_L5D3_Ctr	noSig	LOC101743287
790	KWMTBOMO00790	-0.073	0.219	-0.245	8.18e-01	1.00e+00	-7.511	L5D3_OR_VS_L5D3_Ctr	noSig	LOC101743428
791	KWMTBOMO00791	-0.565	6.433	-2.071	1.01e-01	3.73e-01	-5.718	L5D3_OR_VS_L5D3_Ctr	noSig	LOC101744247
792	KWMTBOMO00792	-0.204	1.118	-0.583	5.88e-01	9.49e-01	-7.347	L5D3_OR_VS_L5D3_Ctr	noSig	LOC733009
793	KWMTBOMO00793	0.249	5.941	0.509	6.35e-01	9.97e-01	-7.394	L5D3_OR_VS_L5D3_Ctr	noSig	LOC101743807
794	KWMTBOMO00794	-0.163	8.556	-0.785	4.73e-01	8.23e-01	-7.194	L5D3_OR_VS_L5D3_Ctr	noSig	LOC732899
795	KWMTBOMO00795	-0.072	1.596	-0.254	8.11e-01	1.00e+00	-7.509	L5D3_OR_VS_L5D3_Ctr	noSig	LOC101743956
796	KWMTBOMO00796	0.01	0.005	1.032	3.55e-01	6.90e-01	-6.964	L5D3_OR_VS_L5D3_Ctr	noSig	NA
797	KWMTBOMO00797	-0.303	0.151	-4.366	9.75e-03	8.80e-02	-3.063	L5D3_OR_VS_L5D3_Ctr	noSig	NA
798	KWMTBOMO00798	0.019	0.038	0.611	5.72e-01	9.30e-01	-7.329	L5D3_OR_VS_L5D3_Ctr	noSig	LOC105842558
799	KWMTBOMO00799	-0.079	0.452	-0.4	7.08e-01	1.00e+00	-7.451	L5D3_OR_VS_L5D3_Ctr	noSig	LOC101744534
800	KWMTBOMO00800	0.228	0.867	0.764	4.84e-01	8.37e-01	-7.212	L5D3_OR_VS_L5D3_Ctr	noSig	LOC101744680
801	KWMTBOMO00801	-0.409	4.143	-4.141	1.18e-02	9.82e-02	-3.29	L5D3_OR_VS_L5D3_Ctr	noSig	LOC101744105
802	KWMTBOMO00802	-0.063	0.032	-1.047	3.49e-01	6.90e-01	-6.949	L5D3_OR_VS_L5D3_Ctr	noSig	LOC101744246
803	KWMTBOMO00803	-0.023	0.03	-0.519	6.29e-01	9.90e-01	-7.388	L5D3_OR_VS_L5D3_Ctr	noSig	LOC101744821
804	KWMTBOMO00804	-0.033	0.016	-1.046	3.50e-01	6.90e-01	-6.95	L5D3_OR_VS_L5D3_Ctr	noSig	NA
805	KWMTBOMO00805	-0.056	0.127	-0.346	7.45e-01	1.00e+00	-7.475	L5D3_OR_VS_L5D3_Ctr	noSig	LOC101744389
806	KWMTBOMO00806	0.041	0.021	1.047	3.49e-01	6.90e-01	-6.949	L5D3_OR_VS_L5D3_Ctr	noSig	NA
807	KWMTBOMO00807	-0.092	0.046	-1.047	3.49e-01	6.90e-01	-6.948	L5D3_OR_VS_L5D3_Ctr	noSig	LOC101744533
808	KWMTBOMO00808	0	0	0	1.00e+00	1.00e+00	-7.548	L5D3_OR_VS_L5D3_Ctr	noSig	LOC101744965
809	KWMTBOMO00809	-0.103	0.174	-0.84	4.44e-01	7.91e-01	-7.147	L5D3_OR_VS_L5D3_Ctr	noSig	NA
810	KWMTBOMO00810	-0.079	0.171	-0.713	5.12e-01	8.66e-01	-7.253	L5D3_OR_VS_L5D3_Ctr	noSig	NA
811	KWMTBOMO00811	0	0	0	1.00e+00	1.00e+00	-7.548	L5D3_OR_VS_L5D3_Ctr	noSig	NA
812	KWMTBOMO00812	0	0	0	1.00e+00	1.00e+00	-7.548	L5D3_OR_VS_L5D3_Ctr	noSig	NA
813	KWMTBOMO00813	-0.596	2.82	-4.373	9.70e-03	8.77e-02	-3.057	L5D3_OR_VS_L5D3_Ctr	noSig	LOC101744679
814	KWMTBOMO00814	-0.174	3.016	-1.301	2.57e-01	6.59e-01	-6.672	L5D3_OR_VS_L5D3_Ctr	noSig	NA
815	KWMTBOMO00815	0.046	0.079	1.213	2.86e-01	6.90e-01	-6.771	L5D3_OR_VS_L5D3_Ctr	noSig	NA
816	KWMTBOMO00816	-0.018	0.07	-0.552	6.08e-01	9.70e-01	-7.368	L5D3_OR_VS_L5D3_Ctr	noSig	LOC105841751
817	KWMTBOMO00817	-0.044	0.097	-1.022	3.60e-01	6.95e-01	-6.974	L5D3_OR_VS_L5D3_Ctr	noSig	NA
818	KWMTBOMO00818	-0.014	0.007	-1.041	3.52e-01	6.90e-01	-6.955	L5D3_OR_VS_L5D3_Ctr	noSig	LOC105842874
819	KWMTBOMO00819	-0.023	0.04	-0.829	4.50e-01	7.98e-01	-7.156	L5D3_OR_VS_L5D3_Ctr	noSig	LOC101735948
820	KWMTBOMO00820	-0.2	0.129	-3.871	1.51e-02	1.15e-01	-3.571	L5D3_OR_VS_L5D3_Ctr	noSig	LOC105842585
821	KWMTBOMO00821	0	0.019	0	1.00e+00	1.00e+00	-7.548	L5D3_OR_VS_L5D3_Ctr	noSig	LOC101739604
822	KWMTBOMO00822	0	0	0	1.00e+00	1.00e+00	-7.548	L5D3_OR_VS_L5D3_Ctr	noSig	LOC101745115
823	KWMTBOMO00823	0	0	0	1.00e+00	1.00e+00	-7.548	L5D3_OR_VS_L5D3_Ctr	noSig	LOC101744964
824	KWMTBOMO00824	0	0	0	1.00e+00	1.00e+00	-7.548	L5D3_OR_VS_L5D3_Ctr	noSig	LOC101745114
825	KWMTBOMO00825	0	0	0	1.00e+00	1.00e+00	-7.548	L5D3_OR_VS_L5D3_Ctr	noSig	NA
826	KWMTBOMO00826	-0.071	0.036	-1.047	3.49e-01	6.90e-01	-6.948	L5D3_OR_VS_L5D3_Ctr	noSig	LOC101745264
827	KWMTBOMO00827	0	0	0	1.00e+00	1.00e+00	-7.548	L5D3_OR_VS_L5D3_Ctr	noSig	LOC101745637
828	KWMTBOMO00828	0	0	0	1.00e+00	1.00e+00	-7.548	L5D3_OR_VS_L5D3_Ctr	noSig	LOC101745786
829	KWMTBOMO00829	0.226	0.231	4.653	7.69e-03	7.68e-02	-2.786	L5D3_OR_VS_L5D3_Ctr	noSig	Hr3
830	KWMTBOMO00830	0.014	0.021	0.46	6.68e-01	1.00e+00	-7.421	L5D3_OR_VS_L5D3_Ctr	noSig	LOC100037421
831	KWMTBOMO00831	0	0	0	1.00e+00	1.00e+00	-7.548	L5D3_OR_VS_L5D3_Ctr	noSig	NA
832	KWMTBOMO00832	0	0	0	1.00e+00	1.00e+00	-7.548	L5D3_OR_VS_L5D3_Ctr	noSig	NA
833	KWMTBOMO00833	-0.089	2.253	-0.42	6.94e-01	1.00e+00	-7.442	L5D3_OR_VS_L5D3_Ctr	noSig	LOC101745407
834	KWMTBOMO00834	-1.554	6.367	-4.05	1.28e-02	1.03e-01	-3.384	L5D3_OR_VS_L5D3_Ctr	noSig	LOC101746268
835	KWMTBOMO00835	0	0	0	1.00e+00	1.00e+00	-7.548	L5D3_OR_VS_L5D3_Ctr	noSig	LOC110385147
836	KWMTBOMO00836	-0.175	0.167	-4.247	1.08e-02	9.31e-02	-3.183	L5D3_OR_VS_L5D3_Ctr	noSig	LOC101745695
837	KWMTBOMO00837	0.312	7.645	2.837	4.22e-02	2.18e-01	-4.754	L5D3_OR_VS_L5D3_Ctr	noSig	LOC101746822
838	KWMTBOMO00838	0.621	12.757	8.91	5.66e-04	2.17e-02	0.27	L5D3_OR_VS_L5D3_Ctr	up	RpL23
839	KWMTBOMO00839	-0.719	4.794	-4.195	1.13e-02	9.54e-02	-3.235	L5D3_OR_VS_L5D3_Ctr	noSig	NA
840	KWMTBOMO00840	0.167	2.282	0.673	5.35e-01	8.92e-01	-7.284	L5D3_OR_VS_L5D3_Ctr	noSig	LOC101745843
841	KWMTBOMO00841	-0.137	0.087	-1.341	2.45e-01	6.37e-01	-6.625	L5D3_OR_VS_L5D3_Ctr	noSig	LOC101735440
842	KWMTBOMO00842	-0.168	2.13	-0.635	5.57e-01	9.15e-01	-7.311	L5D3_OR_VS_L5D3_Ctr	noSig	LOC101741327
843	KWMTBOMO00843	0.007	0.695	0.026	9.81e-01	1.00e+00	-7.547	L5D3_OR_VS_L5D3_Ctr	noSig	LOC101746269
844	KWMTBOMO00844	-0.348	5.55	-1.759	1.47e-01	4.68e-01	-6.115	L5D3_OR_VS_L5D3_Ctr	noSig	LOC101735576
845	KWMTBOMO00845	-0.08	0.04	-1.047	3.49e-01	6.90e-01	-6.948	L5D3_OR_VS_L5D3_Ctr	noSig	NA
846	KWMTBOMO00846	0	0	0	1.00e+00	1.00e+00	-7.548	L5D3_OR_VS_L5D3_Ctr	noSig	NA
847	KWMTBOMO00847	-0.042	0.021	-2.053	1.03e-01	3.76e-01	-5.741	L5D3_OR_VS_L5D3_Ctr	noSig	NA
848	KWMTBOMO00848	0.004	0.078	0.039	9.71e-01	1.00e+00	-7.547	L5D3_OR_VS_L5D3_Ctr	noSig	LOC101735715
849	KWMTBOMO00849	0	0	0	1.00e+00	1.00e+00	-7.548	L5D3_OR_VS_L5D3_Ctr	noSig	NA
850	KWMTBOMO00850	0	0	0	1.00e+00	1.00e+00	-7.548	L5D3_OR_VS_L5D3_Ctr	noSig	LOC101746546
851	KWMTBOMO00851	0	0	0	1.00e+00	1.00e+00	-7.548	L5D3_OR_VS_L5D3_Ctr	noSig	NA
852	KWMTBOMO00852	0.033	0.04	1.267	2.68e-01	6.75e-01	-6.71	L5D3_OR_VS_L5D3_Ctr	noSig	LOC101735849
853	KWMTBOMO00853	-0.268	5.743	-2.196	8.70e-02	3.47e-01	-5.558	L5D3_OR_VS_L5D3_Ctr	noSig	LOC101735535
854	KWMTBOMO00854	0.009	0.264	0.07	9.47e-01	1.00e+00	-7.545	L5D3_OR_VS_L5D3_Ctr	noSig	LOC101746683
855	KWMTBOMO00855	-0.529	0.372	-1.775	1.44e-01	4.63e-01	-6.095	L5D3_OR_VS_L5D3_Ctr	noSig	LOC105842979
856	KWMTBOMO00856	0.141	0.07	1.048	3.49e-01	6.90e-01	-6.948	L5D3_OR_VS_L5D3_Ctr	noSig	LOC105842574
857	KWMTBOMO00857	0.083	0.041	1.83	1.35e-01	4.43e-01	-6.025	L5D3_OR_VS_L5D3_Ctr	noSig	LOC101736212
858	KWMTBOMO00858	-2.583	2.942	-8.163	8.17e-04	2.50e-02	-0.155	L5D3_OR_VS_L5D3_Ctr	down	LOC110385140
859	KWMTBOMO00859	-0.063	0.032	-1.047	3.49e-01	6.90e-01	-6.949	L5D3_OR_VS_L5D3_Ctr	noSig	NA
860	KWMTBOMO00860	-0.135	8.362	-1.159	3.06e-01	6.90e-01	-6.831	L5D3_OR_VS_L5D3_Ctr	noSig	COPZ
861	KWMTBOMO00861	0.162	5.624	2.002	1.10e-01	3.90e-01	-5.806	L5D3_OR_VS_L5D3_Ctr	noSig	LOC733129
862	KWMTBOMO00862	-0.452	4.333	-6.253	2.43e-03	4.14e-02	-1.432	L5D3_OR_VS_L5D3_Ctr	noSig	NA
863	KWMTBOMO00863	-0.16	0.159	-5.718	3.47e-03	4.93e-02	-1.851	L5D3_OR_VS_L5D3_Ctr	noSig	NA
864	KWMTBOMO00864	0	0	0	1.00e+00	1.00e+00	-7.548	L5D3_OR_VS_L5D3_Ctr	noSig	NA
865	KWMTBOMO00865	0	0	0	1.00e+00	1.00e+00	-7.548	L5D3_OR_VS_L5D3_Ctr	noSig	NA
866	KWMTBOMO00866	-0.095	0.274	-2.327	7.47e-02	3.15e-01	-5.392	L5D3_OR_VS_L5D3_Ctr	noSig	LOC110385666
867	KWMTBOMO00867	0	0	0	1.00e+00	1.00e+00	-7.548	L5D3_OR_VS_L5D3_Ctr	noSig	LOC101736342
868	KWMTBOMO00868	-0.195	0.143	-0.833	4.48e-01	7.96e-01	-7.153	L5D3_OR_VS_L5D3_Ctr	noSig	LOC101736464
869	KWMTBOMO00869	0	0	0	1.00e+00	1.00e+00	-7.548	L5D3_OR_VS_L5D3_Ctr	noSig	LOC101736595
870	KWMTBOMO00870	0	0	0	1.00e+00	1.00e+00	-7.548	L5D3_OR_VS_L5D3_Ctr	noSig	NA
871	KWMTBOMO00871	0	0	0	1.00e+00	1.00e+00	-7.548	L5D3_OR_VS_L5D3_Ctr	noSig	NA
872	KWMTBOMO00872	0.063	0.032	1.047	3.49e-01	6.90e-01	-6.949	L5D3_OR_VS_L5D3_Ctr	noSig	Ci-13
873	KWMTBOMO00873	0	0	0	1.00e+00	1.00e+00	-7.548	L5D3_OR_VS_L5D3_Ctr	noSig	NA
874	KWMTBOMO00874	-1.385	3.668	-2.831	4.25e-02	2.19e-01	-4.761	L5D3_OR_VS_L5D3_Ctr	noSig	LOC733136
875	KWMTBOMO00875	-0.326	1.066	-1.679	1.62e-01	4.96e-01	-6.216	L5D3_OR_VS_L5D3_Ctr	noSig	NA
876	KWMTBOMO00876	0.107	0.212	0.614	5.70e-01	9.28e-01	-7.326	L5D3_OR_VS_L5D3_Ctr	noSig	LOC101747094
877	KWMTBOMO00877	0.141	0.121	1.142	3.12e-01	6.90e-01	-6.848	L5D3_OR_VS_L5D3_Ctr	noSig	NA
878	KWMTBOMO00878	0	0	0	1.00e+00	1.00e+00	-7.548	L5D3_OR_VS_L5D3_Ctr	noSig	LOC105842577
879	KWMTBOMO00879	0.015	0.126	0.087	9.35e-01	1.00e+00	-7.543	L5D3_OR_VS_L5D3_Ctr	noSig	LOC101736997
880	KWMTBOMO00880	0	0	0	1.00e+00	1.00e+00	-7.548	L5D3_OR_VS_L5D3_Ctr	noSig	NA
881	KWMTBOMO00881	0.869	2.436	6.889	1.64e-03	3.41e-02	-0.972	L5D3_OR_VS_L5D3_Ctr	up	ced-6
882	KWMTBOMO00882	-0.357	3.604	-2.525	5.96e-02	2.73e-01	-5.141	L5D3_OR_VS_L5D3_Ctr	noSig	LOC101737272
883	KWMTBOMO00883	-0.197	3.059	-0.652	5.47e-01	9.04e-01	-7.299	L5D3_OR_VS_L5D3_Ctr	noSig	LOC101747230
884	KWMTBOMO00884	-0.048	3.146	-0.327	7.59e-01	1.00e+00	-7.483	L5D3_OR_VS_L5D3_Ctr	noSig	LOC101737415
885	KWMTBOMO00885	-0.557	2.629	-2.58	5.60e-02	2.61e-01	-5.072	L5D3_OR_VS_L5D3_Ctr	noSig	NA
886	KWMTBOMO00886	-0.485	1.592	-1.384	2.33e-01	6.18e-01	-6.575	L5D3_OR_VS_L5D3_Ctr	noSig	LOC101735441
887	KWMTBOMO00887	-0.057	0.112	-1.25	2.74e-01	6.85e-01	-6.73	L5D3_OR_VS_L5D3_Ctr	noSig	NA
888	KWMTBOMO00888	-0.613	1.399	-1.54	1.92e-01	5.47e-01	-6.387	L5D3_OR_VS_L5D3_Ctr	noSig	NA
889	KWMTBOMO00889	-0.361	1.638	-1.121	3.20e-01	6.90e-01	-6.871	L5D3_OR_VS_L5D3_Ctr	noSig	LOC101737750
890	KWMTBOMO00890	-0.268	3.593	-0.959	3.87e-01	7.24e-01	-7.037	L5D3_OR_VS_L5D3_Ctr	noSig	LOC101737886
891	KWMTBOMO00891	-0.02	0.575	-0.153	8.85e-01	1.00e+00	-7.533	L5D3_OR_VS_L5D3_Ctr	noSig	TDRD12
892	KWMTBOMO00892	-0.293	0.247	-2.011	1.08e-01	3.87e-01	-5.794	L5D3_OR_VS_L5D3_Ctr	noSig	CPH2
893	KWMTBOMO00893	-0.324	2.007	-0.896	4.17e-01	7.59e-01	-7.096	L5D3_OR_VS_L5D3_Ctr	noSig	LOC110384750
894	KWMTBOMO00894	-0.01	0.005	-1.032	3.55e-01	6.90e-01	-6.964	L5D3_OR_VS_L5D3_Ctr	noSig	NA
895	KWMTBOMO00895	0.067	0.034	1.047	3.49e-01	6.90e-01	-6.948	L5D3_OR_VS_L5D3_Ctr	noSig	CPFL1
896	KWMTBOMO00896	0.05	0.025	1.047	3.49e-01	6.90e-01	-6.949	L5D3_OR_VS_L5D3_Ctr	noSig	CPH3
897	KWMTBOMO00897	0.233	1.501	0.628	5.61e-01	9.20e-01	-7.317	L5D3_OR_VS_L5D3_Ctr	noSig	CPH4
898	KWMTBOMO00898	-0.173	1.52	-0.513	6.33e-01	9.94e-01	-7.391	L5D3_OR_VS_L5D3_Ctr	noSig	LOC101735716
899	KWMTBOMO00899	0	0	0	1.00e+00	1.00e+00	-7.548	L5D3_OR_VS_L5D3_Ctr	noSig	LOC101735850
900	KWMTBOMO00900	-0.122	0.193	-0.817	4.56e-01	8.06e-01	-7.167	L5D3_OR_VS_L5D3_Ctr	noSig	LOC101738020
901	KWMTBOMO00901	-0.337	3.821	-2.115	9.58e-02	3.68e-01	-5.662	L5D3_OR_VS_L5D3_Ctr	noSig	NA
902	KWMTBOMO00902	-0.548	3.175	-1.66	1.66e-01	5.02e-01	-6.24	L5D3_OR_VS_L5D3_Ctr	noSig	LOC101735982
903	KWMTBOMO00903	0.041	0.168	0.178	8.67e-01	1.00e+00	-7.528	L5D3_OR_VS_L5D3_Ctr	noSig	SIFa
904	KWMTBOMO00904	-0.098	0.136	-0.499	6.42e-01	1.00e+00	-7.4	L5D3_OR_VS_L5D3_Ctr	noSig	IMFa
905	KWMTBOMO00905	0.983	2.485	2.208	8.59e-02	3.44e-01	-5.543	L5D3_OR_VS_L5D3_Ctr	noSig	LOC101736113
906	KWMTBOMO00906	0.683	2.519	1.57	1.85e-01	5.36e-01	-6.351	L5D3_OR_VS_L5D3_Ctr	noSig	NA
907	KWMTBOMO00907	0.458	2.583	1.721	1.54e-01	4.82e-01	-6.163	L5D3_OR_VS_L5D3_Ctr	noSig	NA
908	KWMTBOMO00908	0.014	0.054	0.317	7.66e-01	1.00e+00	-7.487	L5D3_OR_VS_L5D3_Ctr	noSig	NA
909	KWMTBOMO00909	0	0	0	1.00e+00	1.00e+00	-7.548	L5D3_OR_VS_L5D3_Ctr	noSig	NA
910	KWMTBOMO00910	-0.135	2.652	-0.733	5.01e-01	8.54e-01	-7.237	L5D3_OR_VS_L5D3_Ctr	noSig	LOC101738281
911	KWMTBOMO00911	-0.216	0.108	-1.866	1.29e-01	4.32e-01	-5.98	L5D3_OR_VS_L5D3_Ctr	noSig	LOC101738418
912	KWMTBOMO00912	0.083	0.041	2.094	9.82e-02	3.72e-01	-5.689	L5D3_OR_VS_L5D3_Ctr	noSig	NA
913	KWMTBOMO00913	-0.1	1.428	-0.274	7.96e-01	1.00e+00	-7.502	L5D3_OR_VS_L5D3_Ctr	noSig	LOC101738552
914	KWMTBOMO00914	0	0	0	1.00e+00	1.00e+00	-7.548	L5D3_OR_VS_L5D3_Ctr	noSig	LOC101736247
915	KWMTBOMO00915	0.183	0.171	1.708	1.56e-01	4.88e-01	-6.18	L5D3_OR_VS_L5D3_Ctr	noSig	Galpha73b
916	KWMTBOMO00916	0	0	0	1.00e+00	1.00e+00	-7.548	L5D3_OR_VS_L5D3_Ctr	noSig	LOC101735384
917	KWMTBOMO00917	0.122	0.061	1.048	3.49e-01	6.90e-01	-6.948	L5D3_OR_VS_L5D3_Ctr	noSig	NA
918	KWMTBOMO00918	0	0	0	1.00e+00	1.00e+00	-7.548	L5D3_OR_VS_L5D3_Ctr	noSig	NA
919	KWMTBOMO00919	0.037	0.033	1.228	2.81e-01	6.90e-01	-6.754	L5D3_OR_VS_L5D3_Ctr	noSig	UGT33R1
920	KWMTBOMO00920	-0.036	0.093	-0.437	6.83e-01	1.00e+00	-7.433	L5D3_OR_VS_L5D3_Ctr	noSig	LOC105842582
921	KWMTBOMO00921	-0.326	0.163	-1.048	3.49e-01	6.90e-01	-6.948	L5D3_OR_VS_L5D3_Ctr	noSig	NA
922	KWMTBOMO00922	0.481	4.125	1.146	3.10e-01	6.90e-01	-6.844	L5D3_OR_VS_L5D3_Ctr	noSig	Cbp
923	KWMTBOMO00923	0.059	0.029	1.047	3.49e-01	6.90e-01	-6.949	L5D3_OR_VS_L5D3_Ctr	noSig	LOC692942
924	KWMTBOMO00924	-0.2	0.825	-1.442	2.17e-01	5.89e-01	-6.507	L5D3_OR_VS_L5D3_Ctr	noSig	LOC101736380
925	KWMTBOMO00925	0	0	0	1.00e+00	1.00e+00	-7.548	L5D3_OR_VS_L5D3_Ctr	noSig	LOC101739373
926	KWMTBOMO00926	0	0	0	1.00e+00	1.00e+00	-7.548	L5D3_OR_VS_L5D3_Ctr	noSig	NA
927	KWMTBOMO00927	0.163	5.916	0.613	5.70e-01	9.29e-01	-7.327	L5D3_OR_VS_L5D3_Ctr	noSig	LOC101739619
928	KWMTBOMO00928	-0.191	3.576	-0.645	5.51e-01	9.08e-01	-7.304	L5D3_OR_VS_L5D3_Ctr	noSig	LOC101736347
929	KWMTBOMO00929	-0.041	0.04	-1.069	3.40e-01	6.90e-01	-6.926	L5D3_OR_VS_L5D3_Ctr	noSig	NA
930	KWMTBOMO00930	-0.339	2.546	-1.218	2.85e-01	6.90e-01	-6.766	L5D3_OR_VS_L5D3_Ctr	noSig	LOC101739762
931	KWMTBOMO00931	0.694	0.37	1.546	1.91e-01	5.45e-01	-6.38	L5D3_OR_VS_L5D3_Ctr	noSig	LOC101739896
932	KWMTBOMO00932	-0.023	0.012	-1.045	3.50e-01	6.90e-01	-6.951	L5D3_OR_VS_L5D3_Ctr	noSig	NA
933	KWMTBOMO00933	0	0.056	0.008	9.94e-01	1.00e+00	-7.548	L5D3_OR_VS_L5D3_Ctr	noSig	LOC110385217
934	KWMTBOMO00934	0.293	0.146	2.595	5.50e-02	2.58e-01	-5.053	L5D3_OR_VS_L5D3_Ctr	noSig	NA
935	KWMTBOMO00935	0.647	0.323	2.053	1.03e-01	3.76e-01	-5.741	L5D3_OR_VS_L5D3_Ctr	noSig	NA
936	KWMTBOMO00936	0.808	0.404	2.754	4.62e-02	2.32e-01	-4.856	L5D3_OR_VS_L5D3_Ctr	noSig	Inv
937	KWMTBOMO00937	0	0	0	1.00e+00	1.00e+00	-7.548	L5D3_OR_VS_L5D3_Ctr	noSig	LOC105842576
938	KWMTBOMO00938	-0.033	1.502	-0.187	8.60e-01	1.00e+00	-7.526	L5D3_OR_VS_L5D3_Ctr	noSig	LOC101740161
939	KWMTBOMO00939	-0.105	0.176	-0.732	5.01e-01	8.55e-01	-7.238	L5D3_OR_VS_L5D3_Ctr	noSig	LOC101740031
940	KWMTBOMO00940	0	0	0	1.00e+00	1.00e+00	-7.548	L5D3_OR_VS_L5D3_Ctr	noSig	LOC101740752
941	KWMTBOMO00941	-0.054	0.027	-1.047	3.49e-01	6.90e-01	-6.949	L5D3_OR_VS_L5D3_Ctr	noSig	LOC101740522
942	KWMTBOMO00942	-1.045	1.481	-8.281	7.69e-04	2.41e-02	-0.085	L5D3_OR_VS_L5D3_Ctr	down	LOC101740389
943	KWMTBOMO00943	0.257	0.523	1.333	2.47e-01	6.41e-01	-6.635	L5D3_OR_VS_L5D3_Ctr	noSig	LOC101736637
944	KWMTBOMO00944	2.48	2.11	5.23	4.92e-03	5.91e-02	-2.262	L5D3_OR_VS_L5D3_Ctr	noSig	LOC101740894
945	KWMTBOMO00945	0	0	0	1.00e+00	1.00e+00	-7.548	L5D3_OR_VS_L5D3_Ctr	noSig	LOC101741035
946	KWMTBOMO00946	0	0	0	1.00e+00	1.00e+00	-7.548	L5D3_OR_VS_L5D3_Ctr	noSig	NPF2
947	KWMTBOMO00947	0	0	0	1.00e+00	1.00e+00	-7.548	L5D3_OR_VS_L5D3_Ctr	noSig	LOC105842586
948	KWMTBOMO00948	-0.094	3.7	-0.301	7.77e-01	1.00e+00	-7.493	L5D3_OR_VS_L5D3_Ctr	noSig	LOC101741323
949	KWMTBOMO00949	-0.856	1.091	-6.628	1.92e-03	3.64e-02	-1.156	L5D3_OR_VS_L5D3_Ctr	down	NA
950	KWMTBOMO00950	-0.13	2.908	-0.541	6.15e-01	9.77e-01	-7.374	L5D3_OR_VS_L5D3_Ctr	noSig	LOC101741550
951	KWMTBOMO00951	0.088	0.044	1.047	3.49e-01	6.90e-01	-6.948	L5D3_OR_VS_L5D3_Ctr	noSig	LOC101741935
952	KWMTBOMO00952	-0.527	2.897	-2.885	4.01e-02	2.12e-01	-4.696	L5D3_OR_VS_L5D3_Ctr	noSig	LOC101741786
953	KWMTBOMO00953	-1.287	2.865	-5.857	3.16e-03	4.66e-02	-1.739	L5D3_OR_VS_L5D3_Ctr	down	LOC101736907
954	KWMTBOMO00954	0.264	1.925	1.176	2.99e-01	6.90e-01	-6.812	L5D3_OR_VS_L5D3_Ctr	noSig	LOC101737039
955	KWMTBOMO00955	-0.005	0.007	-0.72	5.08e-01	8.61e-01	-7.248	L5D3_OR_VS_L5D3_Ctr	noSig	LOC101737466
956	KWMTBOMO00956	-0.034	0.064	-0.48	6.54e-01	1.00e+00	-7.41	L5D3_OR_VS_L5D3_Ctr	noSig	NA
957	KWMTBOMO00957	0	0	0	1.00e+00	1.00e+00	-7.548	L5D3_OR_VS_L5D3_Ctr	noSig	NA
958	KWMTBOMO00958	0	0	0	1.00e+00	1.00e+00	-7.548	L5D3_OR_VS_L5D3_Ctr	noSig	NA
959	KWMTBOMO00959	0	0	0	1.00e+00	1.00e+00	-7.548	L5D3_OR_VS_L5D3_Ctr	noSig	NA
960	KWMTBOMO00960	0	0	0	1.00e+00	1.00e+00	-7.548	L5D3_OR_VS_L5D3_Ctr	noSig	NA
961	KWMTBOMO00961	0	0	0	1.00e+00	1.00e+00	-7.548	L5D3_OR_VS_L5D3_Ctr	noSig	LOC101742237
962	KWMTBOMO00962	0.005	0.002	0.991	3.73e-01	7.05e-01	-7.006	L5D3_OR_VS_L5D3_Ctr	noSig	LOC101746904
963	KWMTBOMO00963	0	0	0	1.00e+00	1.00e+00	-7.548	L5D3_OR_VS_L5D3_Ctr	noSig	NA
964	KWMTBOMO00964	0.028	0.014	1.046	3.50e-01	6.90e-01	-6.95	L5D3_OR_VS_L5D3_Ctr	noSig	LOC101747037
965	KWMTBOMO00965	-0.407	4.352	-2.647	5.19e-02	2.50e-01	-4.988	L5D3_OR_VS_L5D3_Ctr	noSig	LOC101746764
966	KWMTBOMO00966	0	0	0	1.00e+00	1.00e+00	-7.548	L5D3_OR_VS_L5D3_Ctr	noSig	NA
967	KWMTBOMO00967	0	0	0	1.00e+00	1.00e+00	-7.548	L5D3_OR_VS_L5D3_Ctr	noSig	LOC101745266
968	KWMTBOMO00968	0	0	0	1.00e+00	1.00e+00	-7.548	L5D3_OR_VS_L5D3_Ctr	noSig	LOC101745133
969	KWMTBOMO00969	0.059	0.029	1.047	3.49e-01	6.90e-01	-6.949	L5D3_OR_VS_L5D3_Ctr	noSig	NA
970	KWMTBOMO00970	-0.188	0.094	-4.249	1.08e-02	9.31e-02	-3.18	L5D3_OR_VS_L5D3_Ctr	noSig	NA
971	KWMTBOMO00971	-0.923	9.807	-4.459	9.02e-03	8.42e-02	-2.973	L5D3_OR_VS_L5D3_Ctr	noSig	LOC101742284
972	KWMTBOMO00972	-0.706	0.86	-1.596	1.79e-01	5.28e-01	-6.319	L5D3_OR_VS_L5D3_Ctr	noSig	LOC101742430
973	KWMTBOMO00973	-1.03	13.647	-7.756	1.01e-03	2.74e-02	-0.402	L5D3_OR_VS_L5D3_Ctr	down	LOC101743716
974	KWMTBOMO00974	0.779	12.615	10.156	3.26e-04	1.81e-02	0.905	L5D3_OR_VS_L5D3_Ctr	up	RpS21
975	KWMTBOMO00975	-0.397	0.591	-7.864	9.53e-04	2.68e-02	-0.335	L5D3_OR_VS_L5D3_Ctr	noSig	LOC101736617
976	KWMTBOMO00976	0	0	0	1.00e+00	1.00e+00	-7.548	L5D3_OR_VS_L5D3_Ctr	noSig	NA
977	KWMTBOMO00977	-1.735	1.481	-5.758	3.38e-03	4.85e-02	-1.818	L5D3_OR_VS_L5D3_Ctr	down	NA
978	KWMTBOMO00978	-0.095	2.917	-0.39	7.15e-01	1.00e+00	-7.456	L5D3_OR_VS_L5D3_Ctr	noSig	LOC101736762
979	KWMTBOMO00979	-0.429	3.884	-1.866	1.29e-01	4.32e-01	-5.979	L5D3_OR_VS_L5D3_Ctr	noSig	LOC101746290
980	KWMTBOMO00980	0.047	0.977	0.776	4.77e-01	8.29e-01	-7.202	L5D3_OR_VS_L5D3_Ctr	noSig	LOC101736888
981	KWMTBOMO00981	-0.114	0.08	-0.856	4.36e-01	7.83e-01	-7.133	L5D3_OR_VS_L5D3_Ctr	noSig	LOC101746426
982	KWMTBOMO00982	-0.084	7.636	-0.311	7.70e-01	1.00e+00	-7.489	L5D3_OR_VS_L5D3_Ctr	noSig	LOC101737155
983	KWMTBOMO00983	-0.861	0.738	-4.215	1.11e-02	9.47e-02	-3.215	L5D3_OR_VS_L5D3_Ctr	noSig	LOC101737300
984	KWMTBOMO00984	0	0	0	1.00e+00	1.00e+00	-7.548	L5D3_OR_VS_L5D3_Ctr	noSig	LOC101746566
985	KWMTBOMO00985	-0.44	0.445	-3.942	1.41e-02	1.10e-01	-3.496	L5D3_OR_VS_L5D3_Ctr	noSig	LOC101746802
986	KWMTBOMO00986	0	0	0	1.00e+00	1.00e+00	-7.548	L5D3_OR_VS_L5D3_Ctr	noSig	LOC101746943
987	KWMTBOMO00987	0	0	0	1.00e+00	1.00e+00	-7.548	L5D3_OR_VS_L5D3_Ctr	noSig	LOC101747076
988	KWMTBOMO00988	0.041	2.283	0.17	8.72e-01	1.00e+00	-7.53	L5D3_OR_VS_L5D3_Ctr	noSig	NA
989	KWMTBOMO00989	-0.227	2.605	-0.902	4.14e-01	7.56e-01	-7.09	L5D3_OR_VS_L5D3_Ctr	noSig	LOC101737442
990	KWMTBOMO00990	-0.592	1.021	-2.766	4.56e-02	2.29e-01	-4.841	L5D3_OR_VS_L5D3_Ctr	noSig	LOC101735380
991	KWMTBOMO00991	-0.244	0.189	-0.803	4.63e-01	8.14e-01	-7.18	L5D3_OR_VS_L5D3_Ctr	noSig	LOC101735509
992	KWMTBOMO00992	-0.306	0.737	-2.627	5.31e-02	2.53e-01	-5.013	L5D3_OR_VS_L5D3_Ctr	noSig	LOC100862750
993	KWMTBOMO00993	0	0	0	1.00e+00	1.00e+00	-7.548	L5D3_OR_VS_L5D3_Ctr	noSig	LOC101737583
994	KWMTBOMO00994	-0.14	2.532	-0.833	4.48e-01	7.96e-01	-7.153	L5D3_OR_VS_L5D3_Ctr	noSig	LOC101735745
995	KWMTBOMO00995	-0.518	0.454	-0.921	4.05e-01	7.46e-01	-7.073	L5D3_OR_VS_L5D3_Ctr	noSig	LOC101735876
996	KWMTBOMO00996	-0.234	0.168	-0.855	4.37e-01	7.83e-01	-7.134	L5D3_OR_VS_L5D3_Ctr	noSig	NA
997	KWMTBOMO00997	-0.023	0.012	-1.045	3.50e-01	6.90e-01	-6.951	L5D3_OR_VS_L5D3_Ctr	noSig	LOC101736094
998	KWMTBOMO00998	0	0	0	1.00e+00	1.00e+00	-7.548	L5D3_OR_VS_L5D3_Ctr	noSig	NA
999	KWMTBOMO00999	0.187	6.074	1.674	1.63e-01	4.98e-01	-6.222	L5D3_OR_VS_L5D3_Ctr	noSig	LOC101736228
1000	KWMTBOMO01000	-1.304	3.787	-4.347	9.91e-03	8.90e-02	-3.082	L5D3_OR_VS_L5D3_Ctr	noSig	LOC101737726
1001	KWMTBOMO01001	-0.708	14.462	-3.017	3.48e-02	1.93e-01	-4.536	L5D3_OR_VS_L5D3_Ctr	noSig	P25
1002	KWMTBOMO01002	-0.989	1.225	-5.387	4.39e-03	5.53e-02	-2.126	L5D3_OR_VS_L5D3_Ctr	noSig	LOC101737862
1003	KWMTBOMO01003	-0.442	4.013	-1.435	2.19e-01	5.93e-01	-6.515	L5D3_OR_VS_L5D3_Ctr	noSig	LOC110385295
1004	KWMTBOMO01004	-0.485	4.363	-1.662	1.65e-01	5.01e-01	-6.237	L5D3_OR_VS_L5D3_Ctr	noSig	LOC105841715
1005	KWMTBOMO01005	0.014	0.035	0.43	6.87e-01	1.00e+00	-7.437	L5D3_OR_VS_L5D3_Ctr	noSig	LOC101736358
1006	KWMTBOMO01006	0.048	0.289	0.462	6.66e-01	1.00e+00	-7.42	L5D3_OR_VS_L5D3_Ctr	noSig	LOC101736478
1007	KWMTBOMO01007	0.127	2.434	0.486	6.50e-01	1.00e+00	-7.407	L5D3_OR_VS_L5D3_Ctr	noSig	LOC100316860
1008	KWMTBOMO01008	-0.112	0.131	-2.146	9.23e-02	3.59e-01	-5.622	L5D3_OR_VS_L5D3_Ctr	noSig	LOC101736913
1009	KWMTBOMO01009	0.037	0.13	0.678	5.32e-01	8.88e-01	-7.28	L5D3_OR_VS_L5D3_Ctr	noSig	LOC101738867
1010	KWMTBOMO01010	-0.037	0.09	-0.396	7.10e-01	1.00e+00	-7.453	L5D3_OR_VS_L5D3_Ctr	noSig	NA
1011	KWMTBOMO01011	-0.014	0.007	-1.041	3.52e-01	6.90e-01	-6.955	L5D3_OR_VS_L5D3_Ctr	noSig	LOC101738727
1012	KWMTBOMO01012	0	0	0	1.00e+00	1.00e+00	-7.548	L5D3_OR_VS_L5D3_Ctr	noSig	NA
1013	KWMTBOMO01013	0.299	0.149	2.074	1.01e-01	3.73e-01	-5.714	L5D3_OR_VS_L5D3_Ctr	noSig	NA
1014	KWMTBOMO01014	0	0	0	1.00e+00	1.00e+00	-7.548	L5D3_OR_VS_L5D3_Ctr	noSig	NA
1015	KWMTBOMO01015	-0.14	0.236	-0.798	4.66e-01	8.17e-01	-7.184	L5D3_OR_VS_L5D3_Ctr	noSig	NA
1016	KWMTBOMO01016	0.176	0.088	1.613	1.76e-01	5.22e-01	-6.297	L5D3_OR_VS_L5D3_Ctr	noSig	LOC101745514
1017	KWMTBOMO01017	-0.54	0.641	-4.437	9.19e-03	8.50e-02	-2.994	L5D3_OR_VS_L5D3_Ctr	noSig	NA
1018	KWMTBOMO01018	-0.453	4.323	-1.308	2.55e-01	6.55e-01	-6.664	L5D3_OR_VS_L5D3_Ctr	noSig	LOC101745658
1019	KWMTBOMO01019	-0.403	4.494	-0.943	3.94e-01	7.33e-01	-7.052	L5D3_OR_VS_L5D3_Ctr	noSig	LOC101745949
1020	KWMTBOMO01020	-0.781	3.601	-6.86	1.67e-03	3.41e-02	-0.992	L5D3_OR_VS_L5D3_Ctr	down	RMI1
1021	KWMTBOMO01021	-0.035	1.779	-0.127	9.05e-01	1.00e+00	-7.538	L5D3_OR_VS_L5D3_Ctr	noSig	LOC101746093
1022	KWMTBOMO01022	-0.254	2.493	-2.933	3.81e-02	2.04e-01	-4.637	L5D3_OR_VS_L5D3_Ctr	noSig	LOC101738199
1023	KWMTBOMO01023	0.005	0.049	0.189	8.58e-01	1.00e+00	-7.526	L5D3_OR_VS_L5D3_Ctr	noSig	NA
1024	KWMTBOMO01024	-0.11	0.755	-0.646	5.50e-01	9.07e-01	-7.303	L5D3_OR_VS_L5D3_Ctr	noSig	LOC101736238
1025	KWMTBOMO01025	0.082	0.133	1.105	3.26e-01	6.90e-01	-6.889	L5D3_OR_VS_L5D3_Ctr	noSig	NA
1026	KWMTBOMO01026	0	0	0	1.00e+00	1.00e+00	-7.548	L5D3_OR_VS_L5D3_Ctr	noSig	LOC101738215
1027	KWMTBOMO01027	-0.063	0.302	-1.526	1.95e-01	5.54e-01	-6.404	L5D3_OR_VS_L5D3_Ctr	noSig	LOC101746237
1028	KWMTBOMO01028	0	0	0	1.00e+00	1.00e+00	-7.548	L5D3_OR_VS_L5D3_Ctr	noSig	Or-35
1029	KWMTBOMO01029	0	0	0	1.00e+00	1.00e+00	-7.548	L5D3_OR_VS_L5D3_Ctr	noSig	LOC101738432
1030	KWMTBOMO01030	1.078	1.858	2.181	8.86e-02	3.51e-01	-5.578	L5D3_OR_VS_L5D3_Ctr	noSig	LOC101746376
1031	KWMTBOMO01031	0.014	0.007	1.041	3.52e-01	6.90e-01	-6.955	L5D3_OR_VS_L5D3_Ctr	noSig	LOC101738563
1032	KWMTBOMO01032	-0.654	4.325	-2.137	9.33e-02	3.62e-01	-5.633	L5D3_OR_VS_L5D3_Ctr	noSig	LOC101746514
1033	KWMTBOMO01033	-0.601	0.3	-1.834	1.34e-01	4.43e-01	-6.021	L5D3_OR_VS_L5D3_Ctr	noSig	NA
1034	KWMTBOMO01034	-0.3	0.759	-1.24	2.77e-01	6.90e-01	-6.741	L5D3_OR_VS_L5D3_Ctr	noSig	LOC101746655
1035	KWMTBOMO01035	-0.511	1.139	-3.229	2.80e-02	1.68e-01	-4.287	L5D3_OR_VS_L5D3_Ctr	noSig	LOC101738789
1036	KWMTBOMO01036	0.559	5.376	1.093	3.31e-01	6.90e-01	-6.901	L5D3_OR_VS_L5D3_Ctr	noSig	LOC101739065
1037	KWMTBOMO01037	-0.07	0.721	-0.385	7.18e-01	1.00e+00	-7.458	L5D3_OR_VS_L5D3_Ctr	noSig	LOC101738925
1038	KWMTBOMO01038	0	0	0	1.00e+00	1.00e+00	-7.548	L5D3_OR_VS_L5D3_Ctr	noSig	LOC105841296
1039	KWMTBOMO01039	-0.254	0.826	-2.146	9.23e-02	3.59e-01	-5.621	L5D3_OR_VS_L5D3_Ctr	noSig	LOC100500750
1040	KWMTBOMO01040	-0.966	2.035	-3.377	2.41e-02	1.53e-01	-4.117	L5D3_OR_VS_L5D3_Ctr	noSig	NA
1041	KWMTBOMO01041	0.259	2.344	0.988	3.74e-01	7.07e-01	-7.008	L5D3_OR_VS_L5D3_Ctr	noSig	LOC101739296
1042	KWMTBOMO01042	-0.054	2.832	-0.444	6.78e-01	1.00e+00	-7.43	L5D3_OR_VS_L5D3_Ctr	noSig	LOC101746935
1043	KWMTBOMO01043	1.811	6.828	4.897	6.34e-03	6.88e-02	-2.558	L5D3_OR_VS_L5D3_Ctr	noSig	LOC101739441
1044	KWMTBOMO01044	0.041	0.021	1.047	3.49e-01	6.90e-01	-6.949	L5D3_OR_VS_L5D3_Ctr	noSig	NA
1045	KWMTBOMO01045	-0.434	2.12	-3.54	2.06e-02	1.39e-01	-3.932	L5D3_OR_VS_L5D3_Ctr	noSig	LOC101739724
1046	KWMTBOMO01046	-1.023	3.363	-8.23	7.89e-04	2.46e-02	-0.116	L5D3_OR_VS_L5D3_Ctr	down	LOC101739864
1047	KWMTBOMO01047	-1.21	3.728	-11.05	2.28e-04	1.66e-02	1.313	L5D3_OR_VS_L5D3_Ctr	down	LOC101740129
1048	KWMTBOMO01048	-0.804	1.964	-3.3	2.61e-02	1.60e-01	-4.205	L5D3_OR_VS_L5D3_Ctr	noSig	LOC101739997
1049	KWMTBOMO01049	-0.349	3.06	-3.018	3.48e-02	1.92e-01	-4.535	L5D3_OR_VS_L5D3_Ctr	noSig	LOC101740268
1050	KWMTBOMO01050	-0.665	1.791	-1.635	1.71e-01	5.12e-01	-6.271	L5D3_OR_VS_L5D3_Ctr	noSig	LOC101747067
1051	KWMTBOMO01051	0	0	0	1.00e+00	1.00e+00	-7.548	L5D3_OR_VS_L5D3_Ctr	noSig	LOC110384826
1052	KWMTBOMO01052	0.023	0.09	0.618	5.67e-01	9.26e-01	-7.324	L5D3_OR_VS_L5D3_Ctr	noSig	LOC101747202
1053	KWMTBOMO01053	-0.17	2.647	-1.866	1.29e-01	4.32e-01	-5.98	L5D3_OR_VS_L5D3_Ctr	noSig	LOC101740490
1054	KWMTBOMO01054	-0.901	4.713	-7.233	1.35e-03	3.07e-02	-0.739	L5D3_OR_VS_L5D3_Ctr	down	LOC101740631
1055	KWMTBOMO01055	0.164	12.251	1.841	1.33e-01	4.40e-01	-6.012	L5D3_OR_VS_L5D3_Ctr	noSig	RpS26
1056	KWMTBOMO01056	-0.223	4.076	-0.585	5.88e-01	9.48e-01	-7.346	L5D3_OR_VS_L5D3_Ctr	noSig	LOC101740771
1057	KWMTBOMO01057	-0.827	2.435	-2.958	3.71e-02	2.01e-01	-4.607	L5D3_OR_VS_L5D3_Ctr	noSig	LOC101740910
1058	KWMTBOMO01058	0.093	0.142	0.782	4.74e-01	8.26e-01	-7.197	L5D3_OR_VS_L5D3_Ctr	noSig	NA
1059	KWMTBOMO01059	-0.01	3.478	-0.031	9.76e-01	1.00e+00	-7.547	L5D3_OR_VS_L5D3_Ctr	noSig	LOC732951
1060	KWMTBOMO01060	-0.122	4.806	-0.963	3.86e-01	7.21e-01	-7.033	L5D3_OR_VS_L5D3_Ctr	noSig	NA
1061	KWMTBOMO01061	-0.162	5.175	-1.806	1.39e-01	4.52e-01	-6.056	L5D3_OR_VS_L5D3_Ctr	noSig	3HCD
1062	KWMTBOMO01062	-0.497	3.35	-2.882	4.02e-02	2.12e-01	-4.7	L5D3_OR_VS_L5D3_Ctr	noSig	LOC101741053
1063	KWMTBOMO01063	-0.495	3.976	-2.564	5.70e-02	2.64e-01	-5.092	L5D3_OR_VS_L5D3_Ctr	noSig	Jnk
1064	KWMTBOMO01064	-0.044	6.828	-0.167	8.75e-01	1.00e+00	-7.531	L5D3_OR_VS_L5D3_Ctr	noSig	Lark
1065	KWMTBOMO01065	-0.517	4.599	-2.839	4.21e-02	2.18e-01	-4.752	L5D3_OR_VS_L5D3_Ctr	noSig	LOC101741200
1066	KWMTBOMO01066	0	0	0	1.00e+00	1.00e+00	-7.548	L5D3_OR_VS_L5D3_Ctr	noSig	NA
1067	KWMTBOMO01067	-0.017	0.142	-0.662	5.41e-01	8.99e-01	-7.292	L5D3_OR_VS_L5D3_Ctr	noSig	NA
1068	KWMTBOMO01068	0.195	13.22	2.544	5.83e-02	2.69e-01	-5.117	L5D3_OR_VS_L5D3_Ctr	noSig	RpL34
1069	KWMTBOMO01069	-0.08	0.04	-1.047	3.49e-01	6.90e-01	-6.948	L5D3_OR_VS_L5D3_Ctr	noSig	NA
1070	KWMTBOMO01070	-0.486	3.718	-6.811	1.72e-03	3.45e-02	-1.027	L5D3_OR_VS_L5D3_Ctr	noSig	LOC101741422
1071	KWMTBOMO01071	-1.061	2.561	-6.556	2.01e-03	3.70e-02	-1.208	L5D3_OR_VS_L5D3_Ctr	down	LOC101741560
1072	KWMTBOMO01072	-0.295	4.823	-0.863	4.33e-01	7.79e-01	-7.127	L5D3_OR_VS_L5D3_Ctr	noSig	LOC101735413
1073	KWMTBOMO01073	-0.228	2.195	-1.39	2.31e-01	6.16e-01	-6.568	L5D3_OR_VS_L5D3_Ctr	noSig	LOC101735547
1074	KWMTBOMO01074	-0.709	1.435	-5.898	3.07e-03	4.62e-02	-1.707	L5D3_OR_VS_L5D3_Ctr	down	LOC692909
1075	KWMTBOMO01075	0.059	6.831	0.139	8.95e-01	1.00e+00	-7.536	L5D3_OR_VS_L5D3_Ctr	noSig	LOC101741707
1076	KWMTBOMO01076	-0.627	7.087	-5.445	4.21e-03	5.39e-02	-2.077	L5D3_OR_VS_L5D3_Ctr	noSig	LOC692855
1077	KWMTBOMO01077	-0.801	6.28	-8.081	8.52e-04	2.56e-02	-0.204	L5D3_OR_VS_L5D3_Ctr	down	LOC101741855
1078	KWMTBOMO01078	-0.226	3.546	-0.737	4.99e-01	8.52e-01	-7.234	L5D3_OR_VS_L5D3_Ctr	noSig	LOC101735688
1079	KWMTBOMO01079	-0.101	1.974	-0.405	7.05e-01	1.00e+00	-7.449	L5D3_OR_VS_L5D3_Ctr	noSig	LOC101742147
1080	KWMTBOMO01080	0	0	0	1.00e+00	1.00e+00	-7.548	L5D3_OR_VS_L5D3_Ctr	noSig	Cyp366a1
1081	KWMTBOMO01081	0	0	0	1.00e+00	1.00e+00	-7.548	L5D3_OR_VS_L5D3_Ctr	noSig	NA
1082	KWMTBOMO01082	0.059	0.029	1.047	3.49e-01	6.90e-01	-6.949	L5D3_OR_VS_L5D3_Ctr	noSig	Or-39
1083	KWMTBOMO01083	0.104	0.052	1.972	1.14e-01	3.99e-01	-5.845	L5D3_OR_VS_L5D3_Ctr	noSig	Or-38
1084	KWMTBOMO01084	-0.306	3.925	-2.29	7.79e-02	3.24e-01	-5.438	L5D3_OR_VS_L5D3_Ctr	noSig	LOC101742293
1085	KWMTBOMO01085	-0.049	0.25	-0.355	7.39e-01	1.00e+00	-7.471	L5D3_OR_VS_L5D3_Ctr	noSig	LOC101742440
1086	KWMTBOMO01086	0.47	0.986	3.379	2.41e-02	1.53e-01	-4.114	L5D3_OR_VS_L5D3_Ctr	noSig	LOC101742584
1087	KWMTBOMO01087	-0.098	3.437	-0.409	7.02e-01	1.00e+00	-7.447	L5D3_OR_VS_L5D3_Ctr	noSig	LOC101742723
1088	KWMTBOMO01088	0.405	4.121	1.47	2.09e-01	5.78e-01	-6.473	L5D3_OR_VS_L5D3_Ctr	noSig	LOC101735829
1089	KWMTBOMO01089	-0.601	2.939	-1.79	1.42e-01	4.58e-01	-6.076	L5D3_OR_VS_L5D3_Ctr	noSig	LOC101743212
1090	KWMTBOMO01090	0.051	0.026	1.657	1.66e-01	5.03e-01	-6.243	L5D3_OR_VS_L5D3_Ctr	noSig	LOC101736087
1091	KWMTBOMO01091	-0.008	6.183	-0.057	9.57e-01	1.00e+00	-7.546	L5D3_OR_VS_L5D3_Ctr	noSig	LOC101743531
1092	KWMTBOMO01092	0	0	0	1.00e+00	1.00e+00	-7.548	L5D3_OR_VS_L5D3_Ctr	noSig	NA
1093	KWMTBOMO01093	0	0	0	1.00e+00	1.00e+00	-7.548	L5D3_OR_VS_L5D3_Ctr	noSig	NA
1094	KWMTBOMO01094	0	0	0	1.00e+00	1.00e+00	-7.548	L5D3_OR_VS_L5D3_Ctr	noSig	LOC101736475
1095	KWMTBOMO01095	0.066	5.109	0.248	8.16e-01	1.00e+00	-7.51	L5D3_OR_VS_L5D3_Ctr	noSig	LOC101743670
1096	KWMTBOMO01096	0.059	0.12	0.936	3.98e-01	7.36e-01	-7.058	L5D3_OR_VS_L5D3_Ctr	noSig	LOC101736753
1097	KWMTBOMO01097	0	0	0	1.00e+00	1.00e+00	-7.548	L5D3_OR_VS_L5D3_Ctr	noSig	LOC101736879
1098	KWMTBOMO01098	-0.456	1.962	-2.133	9.37e-02	3.63e-01	-5.638	L5D3_OR_VS_L5D3_Ctr	noSig	NA
1099	KWMTBOMO01099	-0.26	2.335	-0.632	5.59e-01	9.17e-01	-7.314	L5D3_OR_VS_L5D3_Ctr	noSig	NA
1100	KWMTBOMO01100	0.361	0.181	3.991	1.35e-02	1.07e-01	-3.445	L5D3_OR_VS_L5D3_Ctr	noSig	LOC101743819
1101	KWMTBOMO01101	0	0	0	1.00e+00	1.00e+00	-7.548	L5D3_OR_VS_L5D3_Ctr	noSig	LOC105841304
1102	KWMTBOMO01102	-0.005	0.017	-0.206	8.46e-01	1.00e+00	-7.522	L5D3_OR_VS_L5D3_Ctr	noSig	NA
1103	KWMTBOMO01103	0	0	0	1.00e+00	1.00e+00	-7.548	L5D3_OR_VS_L5D3_Ctr	noSig	LOC105841299
1104	KWMTBOMO01104	0	0	0	1.00e+00	1.00e+00	-7.548	L5D3_OR_VS_L5D3_Ctr	noSig	LOC110384836
1105	KWMTBOMO01105	0	0	0	1.00e+00	1.00e+00	-7.548	L5D3_OR_VS_L5D3_Ctr	noSig	LOC101737013
1106	KWMTBOMO01106	0.274	2.369	0.796	4.67e-01	8.18e-01	-7.186	L5D3_OR_VS_L5D3_Ctr	noSig	LOC101743967
1107	KWMTBOMO01107	0.234	0.197	2.977	3.63e-02	1.98e-01	-4.584	L5D3_OR_VS_L5D3_Ctr	noSig	NA
1108	KWMTBOMO01108	-0.005	0.04	-0.164	8.77e-01	1.00e+00	-7.531	L5D3_OR_VS_L5D3_Ctr	noSig	NA
1109	KWMTBOMO01109	0.197	0.098	2.448	6.50e-02	2.90e-01	-5.237	L5D3_OR_VS_L5D3_Ctr	noSig	NA
1110	KWMTBOMO01110	0.049	0.075	0.611	5.72e-01	9.30e-01	-7.329	L5D3_OR_VS_L5D3_Ctr	noSig	NA
1111	KWMTBOMO01111	0.041	0.021	1.047	3.49e-01	6.90e-01	-6.949	L5D3_OR_VS_L5D3_Ctr	noSig	LOC101737289
1112	KWMTBOMO01112	-0.189	0.205	-2.775	4.52e-02	2.28e-01	-4.83	L5D3_OR_VS_L5D3_Ctr	noSig	LOC101737431
1113	KWMTBOMO01113	0.014	0.007	1.041	3.52e-01	6.90e-01	-6.955	L5D3_OR_VS_L5D3_Ctr	noSig	LOC101737572
1114	KWMTBOMO01114	-0.043	6.231	-0.177	8.68e-01	1.00e+00	-7.529	L5D3_OR_VS_L5D3_Ctr	noSig	LOC101744256
1115	KWMTBOMO01115	0.309	5.923	0.954	3.90e-01	7.26e-01	-7.041	L5D3_OR_VS_L5D3_Ctr	noSig	LOC101744452
1116	KWMTBOMO01116	-0.914	1.277	-2.072	1.01e-01	3.73e-01	-5.717	L5D3_OR_VS_L5D3_Ctr	noSig	LOC101744695
1117	KWMTBOMO01117	0.145	0.19	1.451	2.14e-01	5.85e-01	-6.495	L5D3_OR_VS_L5D3_Ctr	noSig	LOC105841298
1118	KWMTBOMO01118	-0.596	2.086	-1.912	1.22e-01	4.17e-01	-5.921	L5D3_OR_VS_L5D3_Ctr	noSig	Fah
1119	KWMTBOMO01119	-0.326	1.142	-1.551	1.90e-01	5.43e-01	-6.374	L5D3_OR_VS_L5D3_Ctr	noSig	LOC101737715
1120	KWMTBOMO01120	-0.055	0.042	-1.533	1.94e-01	5.50e-01	-6.396	L5D3_OR_VS_L5D3_Ctr	noSig	NA
1121	KWMTBOMO01121	-0.326	3.261	-1.025	3.58e-01	6.94e-01	-6.971	L5D3_OR_VS_L5D3_Ctr	noSig	LOC101737853
1122	KWMTBOMO01122	-0.295	0.738	-1.381	2.34e-01	6.20e-01	-6.579	L5D3_OR_VS_L5D3_Ctr	noSig	LOC101745220
1123	KWMTBOMO01123	0.17	1.447	1.192	2.94e-01	6.90e-01	-6.795	L5D3_OR_VS_L5D3_Ctr	noSig	LOC101745369
1124	KWMTBOMO01124	-0.604	1.996	-1.86	1.30e-01	4.34e-01	-5.988	L5D3_OR_VS_L5D3_Ctr	noSig	Apkc
1125	KWMTBOMO01125	-0.07	0.049	-4.575	8.20e-03	7.99e-02	-2.86	L5D3_OR_VS_L5D3_Ctr	noSig	NA
1126	KWMTBOMO01126	-0.179	0.425	-2.769	4.54e-02	2.29e-01	-4.838	L5D3_OR_VS_L5D3_Ctr	noSig	NA
1127	KWMTBOMO01127	-0.299	0.627	-1.773	1.44e-01	4.63e-01	-6.097	L5D3_OR_VS_L5D3_Ctr	noSig	Apkc.1
1128	KWMTBOMO01128	0.033	1.047	0.309	7.72e-01	1.00e+00	-7.49	L5D3_OR_VS_L5D3_Ctr	noSig	LOC101743030
1129	KWMTBOMO01129	-0.51	5.318	-2.553	5.77e-02	2.67e-01	-5.106	L5D3_OR_VS_L5D3_Ctr	noSig	LOC732972
1130	KWMTBOMO01130	-1.318	1.902	-6.235	2.46e-03	4.18e-02	-1.446	L5D3_OR_VS_L5D3_Ctr	down	LOC100529238
1131	KWMTBOMO01131	-0.204	10.996	-2.408	6.80e-02	2.97e-01	-5.288	L5D3_OR_VS_L5D3_Ctr	noSig	LOC693075
1132	KWMTBOMO01132	0	0	0	1.00e+00	1.00e+00	-7.548	L5D3_OR_VS_L5D3_Ctr	noSig	LOC101740728
1133	KWMTBOMO01133	-0.504	1.318	-1.738	1.51e-01	4.75e-01	-6.142	L5D3_OR_VS_L5D3_Ctr	noSig	LOC101736847
1134	KWMTBOMO01134	0.014	0.007	1.041	3.52e-01	6.90e-01	-6.955	L5D3_OR_VS_L5D3_Ctr	noSig	LOC101736976
1135	KWMTBOMO01135	-0.655	4.632	-1.361	2.39e-01	6.28e-01	-6.602	L5D3_OR_VS_L5D3_Ctr	noSig	LOC732945
1136	KWMTBOMO01136	-0.343	1.556	-3.199	2.89e-02	1.72e-01	-4.322	L5D3_OR_VS_L5D3_Ctr	noSig	LOC101737106
1137	KWMTBOMO01137	-1.045	2.824	-3.766	1.66e-02	1.21e-01	-3.684	L5D3_OR_VS_L5D3_Ctr	noSig	NA
1138	KWMTBOMO01138	0	0	0	1.00e+00	1.00e+00	-7.548	L5D3_OR_VS_L5D3_Ctr	noSig	LOC101741006
1139	KWMTBOMO01139	-0.177	2.161	-0.751	4.91e-01	8.44e-01	-7.223	L5D3_OR_VS_L5D3_Ctr	noSig	LOC101741153
1140	KWMTBOMO01140	-2.077	6.149	-8.026	8.76e-04	2.58e-02	-0.237	L5D3_OR_VS_L5D3_Ctr	down	LOC101737397
1141	KWMTBOMO01141	-0.312	0.494	-1.944	1.18e-01	4.07e-01	-5.88	L5D3_OR_VS_L5D3_Ctr	noSig	LOC101741433
1142	KWMTBOMO01142	-0.287	3.594	-1.149	3.09e-01	6.90e-01	-6.841	L5D3_OR_VS_L5D3_Ctr	noSig	LOC101737539
1143	KWMTBOMO01143	0.076	0.133	1.081	3.35e-01	6.90e-01	-6.913	L5D3_OR_VS_L5D3_Ctr	noSig	LOC101737684
1144	KWMTBOMO01144	-0.09	0.508	-0.212	8.42e-01	1.00e+00	-7.52	L5D3_OR_VS_L5D3_Ctr	noSig	NA
1145	KWMTBOMO01145	0.218	0.596	1.03	3.56e-01	6.91e-01	-6.966	L5D3_OR_VS_L5D3_Ctr	noSig	LOC101741572
1146	KWMTBOMO01146	-0.202	1.34	-1.589	1.81e-01	5.30e-01	-6.328	L5D3_OR_VS_L5D3_Ctr	noSig	LOC101741718
1147	KWMTBOMO01147	-0.116	6.128	-0.446	6.77e-01	1.00e+00	-7.429	L5D3_OR_VS_L5D3_Ctr	noSig	LOC101737820
1148	KWMTBOMO01148	-0.239	11.738	-2.067	1.01e-01	3.73e-01	-5.723	L5D3_OR_VS_L5D3_Ctr	noSig	Rack1
1149	KWMTBOMO01149	-0.731	2.245	-5.512	4.01e-03	5.30e-02	-2.021	L5D3_OR_VS_L5D3_Ctr	noSig	Mppd
1150	KWMTBOMO01150	-0.124	2.97	-0.351	7.42e-01	1.00e+00	-7.473	L5D3_OR_VS_L5D3_Ctr	noSig	LOC101741866
1151	KWMTBOMO01151	-0.363	3.206	-0.967	3.84e-01	7.19e-01	-7.029	L5D3_OR_VS_L5D3_Ctr	noSig	NA
1152	KWMTBOMO01152	-0.316	3.573	-1.159	3.05e-01	6.90e-01	-6.83	L5D3_OR_VS_L5D3_Ctr	noSig	NA
1153	KWMTBOMO01153	-0.602	2.486	-6.597	1.96e-03	3.67e-02	-1.179	L5D3_OR_VS_L5D3_Ctr	down	LOC101737952
1154	KWMTBOMO01154	-0.272	0.227	-2.979	3.63e-02	1.97e-01	-4.583	L5D3_OR_VS_L5D3_Ctr	noSig	LOC101738086
1155	KWMTBOMO01155	-0.311	0.891	-1.559	1.88e-01	5.39e-01	-6.364	L5D3_OR_VS_L5D3_Ctr	noSig	LOC101738343
1156	KWMTBOMO01156	0.177	6.177	0.962	3.86e-01	7.22e-01	-7.034	L5D3_OR_VS_L5D3_Ctr	noSig	LOC101738481
1157	KWMTBOMO01157	-0.884	3.847	-4.146	1.18e-02	9.81e-02	-3.285	L5D3_OR_VS_L5D3_Ctr	noSig	LOC101738609
1158	KWMTBOMO01158	-0.01	0.005	-1.032	3.55e-01	6.90e-01	-6.964	L5D3_OR_VS_L5D3_Ctr	noSig	LOC110385209
1159	KWMTBOMO01159	0	0	0	1.00e+00	1.00e+00	-7.548	L5D3_OR_VS_L5D3_Ctr	noSig	NA
1160	KWMTBOMO01160	-0.014	0.007	-1.041	3.52e-01	6.90e-01	-6.955	L5D3_OR_VS_L5D3_Ctr	noSig	NA
1161	KWMTBOMO01161	0	0	0	1.00e+00	1.00e+00	-7.548	L5D3_OR_VS_L5D3_Ctr	noSig	NA
1162	KWMTBOMO01162	-0.447	1.041	-2.043	1.04e-01	3.79e-01	-5.753	L5D3_OR_VS_L5D3_Ctr	noSig	_Bre4
1163	KWMTBOMO01163	0	0	0	1.00e+00	1.00e+00	-7.548	L5D3_OR_VS_L5D3_Ctr	noSig	LOC101738885
1164	KWMTBOMO01164	-0.08	2.71	-0.289	7.86e-01	1.00e+00	-7.497	L5D3_OR_VS_L5D3_Ctr	noSig	LOC101740705
1165	KWMTBOMO01165	-0.437	7.004	-3.437	2.28e-02	1.47e-01	-4.048	L5D3_OR_VS_L5D3_Ctr	noSig	LOC101739023
1166	KWMTBOMO01166	-0.148	0.621	-0.761	4.86e-01	8.39e-01	-7.215	L5D3_OR_VS_L5D3_Ctr	noSig	NA
1167	KWMTBOMO01167	-0.235	0.666	-1.239	2.77e-01	6.90e-01	-6.742	L5D3_OR_VS_L5D3_Ctr	noSig	LOC101742157
1168	KWMTBOMO01168	-0.456	0.228	-1.048	3.49e-01	6.90e-01	-6.948	L5D3_OR_VS_L5D3_Ctr	noSig	NA
1169	KWMTBOMO01169	0.145	0.261	0.643	5.52e-01	9.09e-01	-7.306	L5D3_OR_VS_L5D3_Ctr	noSig	LOC110385465
1170	KWMTBOMO01170	0.514	6.716	4.008	1.33e-02	1.06e-01	-3.427	L5D3_OR_VS_L5D3_Ctr	noSig	Sod2
1171	KWMTBOMO01171	-0.626	3.283	-14.417	7.28e-05	1.08e-02	2.578	L5D3_OR_VS_L5D3_Ctr	down	LOC101739170
1172	KWMTBOMO01172	-0.385	3.347	-3.072	3.29e-02	1.85e-01	-4.472	L5D3_OR_VS_L5D3_Ctr	noSig	LOC101739305
1173	KWMTBOMO01173	-1.389	4.802	-7.62	1.09e-03	2.80e-02	-0.488	L5D3_OR_VS_L5D3_Ctr	down	LOC101742299
1174	KWMTBOMO01174	-0.368	5.521	-2.077	1.00e-01	3.73e-01	-5.71	L5D3_OR_VS_L5D3_Ctr	noSig	LOC101739451
1175	KWMTBOMO01175	-0.111	3.366	-0.404	7.05e-01	1.00e+00	-7.45	L5D3_OR_VS_L5D3_Ctr	noSig	LOC101739592
1176	KWMTBOMO01176	-0.552	0.939	-2.058	1.03e-01	3.75e-01	-5.735	L5D3_OR_VS_L5D3_Ctr	noSig	LOC110385388
1177	KWMTBOMO01177	-0.086	5.294	-0.241	8.20e-01	1.00e+00	-7.512	L5D3_OR_VS_L5D3_Ctr	noSig	LOC101739920
1178	KWMTBOMO01178	0.158	0.526	0.967	3.84e-01	7.19e-01	-7.029	L5D3_OR_VS_L5D3_Ctr	noSig	NA
1179	KWMTBOMO01179	-0.495	3.779	-1.17	3.01e-01	6.90e-01	-6.818	L5D3_OR_VS_L5D3_Ctr	noSig	NA
1180	KWMTBOMO01180	-0.395	0.926	-1.435	2.18e-01	5.93e-01	-6.514	L5D3_OR_VS_L5D3_Ctr	noSig	LOC101740056
1181	KWMTBOMO01181	-0.041	0.04	-1.161	3.05e-01	6.90e-01	-6.828	L5D3_OR_VS_L5D3_Ctr	noSig	LOC101742449
1182	KWMTBOMO01182	0.082	10.491	3.073	3.29e-02	1.85e-01	-4.47	L5D3_OR_VS_L5D3_Ctr	noSig	LOC692786
1183	KWMTBOMO01183	-0.332	2.859	-1.104	3.26e-01	6.90e-01	-6.89	L5D3_OR_VS_L5D3_Ctr	noSig	LOC101740189
1184	KWMTBOMO01184	0	0	0	1.00e+00	1.00e+00	-7.548	L5D3_OR_VS_L5D3_Ctr	noSig	LOC101742593
1185	KWMTBOMO01185	0.063	0.095	0.741	4.97e-01	8.50e-01	-7.231	L5D3_OR_VS_L5D3_Ctr	noSig	NA
1186	KWMTBOMO01186	-0.547	4.392	-2.404	6.83e-02	2.98e-01	-5.293	L5D3_OR_VS_L5D3_Ctr	noSig	LOC101740456
1187	KWMTBOMO01187	-1.558	4.555	-10.044	3.42e-04	1.87e-02	0.851	L5D3_OR_VS_L5D3_Ctr	down	LOC101740589
1188	KWMTBOMO01188	0.099	4.389	0.201	8.50e-01	1.00e+00	-7.523	L5D3_OR_VS_L5D3_Ctr	noSig	LOC101735512
1189	KWMTBOMO01189	0.323	4.049	2.849	4.17e-02	2.16e-01	-4.74	L5D3_OR_VS_L5D3_Ctr	noSig	LOC101747176
1190	KWMTBOMO01190	-0.368	0.723	-2.939	3.78e-02	2.03e-01	-4.631	L5D3_OR_VS_L5D3_Ctr	noSig	LOC101735649
1191	KWMTBOMO01191	-0.277	2.073	-0.568	5.98e-01	9.58e-01	-7.357	L5D3_OR_VS_L5D3_Ctr	noSig	LOC101735791
1192	KWMTBOMO01192	-0.526	2.337	-1.139	3.13e-01	6.90e-01	-6.852	L5D3_OR_VS_L5D3_Ctr	noSig	LOC101746500
1193	KWMTBOMO01193	-0.63	1.995	-4.733	7.21e-03	7.35e-02	-2.71	L5D3_OR_VS_L5D3_Ctr	noSig	LOC101742348
1194	KWMTBOMO01194	-0.782	2.751	-3.517	2.10e-02	1.41e-01	-3.958	L5D3_OR_VS_L5D3_Ctr	noSig	LOC733033
1195	KWMTBOMO01195	0.028	0.014	1.046	3.50e-01	6.90e-01	-6.95	L5D3_OR_VS_L5D3_Ctr	noSig	NA
1196	KWMTBOMO01196	0.028	0.014	1.046	3.50e-01	6.90e-01	-6.95	L5D3_OR_VS_L5D3_Ctr	noSig	LOC110386227
1197	KWMTBOMO01197	0	0.028	0.014	9.90e-01	1.00e+00	-7.548	L5D3_OR_VS_L5D3_Ctr	noSig	NA
1198	KWMTBOMO01198	-0.028	0.028	-0.903	4.13e-01	7.55e-01	-7.09	L5D3_OR_VS_L5D3_Ctr	noSig	LOC101744315
1199	KWMTBOMO01199	0	0	0	1.00e+00	1.00e+00	-7.548	L5D3_OR_VS_L5D3_Ctr	noSig	NA
1200	KWMTBOMO01200	0	0	0	1.00e+00	1.00e+00	-7.548	L5D3_OR_VS_L5D3_Ctr	noSig	NA
1201	KWMTBOMO01201	0	0	0	1.00e+00	1.00e+00	-7.548	L5D3_OR_VS_L5D3_Ctr	noSig	NA
1202	KWMTBOMO01202	0	0	0	1.00e+00	1.00e+00	-7.548	L5D3_OR_VS_L5D3_Ctr	noSig	NA
1203	KWMTBOMO01203	0	0	0	1.00e+00	1.00e+00	-7.548	L5D3_OR_VS_L5D3_Ctr	noSig	NGR-A14
1204	KWMTBOMO01204	0.415	0.599	1.018	3.62e-01	6.98e-01	-6.978	L5D3_OR_VS_L5D3_Ctr	noSig	LOC101741350
1205	KWMTBOMO01205	0	0	0	1.00e+00	1.00e+00	-7.548	L5D3_OR_VS_L5D3_Ctr	noSig	NA
1206	KWMTBOMO01206	0	0	0	1.00e+00	1.00e+00	-7.548	L5D3_OR_VS_L5D3_Ctr	noSig	LOC101741012
1207	KWMTBOMO01207	0	0	0	1.00e+00	1.00e+00	-7.548	L5D3_OR_VS_L5D3_Ctr	noSig	NA
1208	KWMTBOMO01208	-0.005	0.076	-0.086	9.35e-01	1.00e+00	-7.543	L5D3_OR_VS_L5D3_Ctr	noSig	NA
1209	KWMTBOMO01209	0	0	0	1.00e+00	1.00e+00	-7.548	L5D3_OR_VS_L5D3_Ctr	noSig	NA
1210	KWMTBOMO01210	-0.055	0.07	-2.098	9.77e-02	3.72e-01	-5.683	L5D3_OR_VS_L5D3_Ctr	noSig	NA
1211	KWMTBOMO01211	-0.042	0.044	-1.086	3.34e-01	6.90e-01	-6.909	L5D3_OR_VS_L5D3_Ctr	noSig	NA
1212	KWMTBOMO01212	0.451	0.907	2.006	1.09e-01	3.89e-01	-5.802	L5D3_OR_VS_L5D3_Ctr	noSig	LOC101737662
1213	KWMTBOMO01213	0.036	0.492	0.282	7.91e-01	1.00e+00	-7.499	L5D3_OR_VS_L5D3_Ctr	noSig	LOC105842655
1214	KWMTBOMO01214	-0.026	0.482	-0.379	7.22e-01	1.00e+00	-7.461	L5D3_OR_VS_L5D3_Ctr	noSig	LOC101736910
1215	KWMTBOMO01215	-0.092	0.138	-0.999	3.70e-01	7.05e-01	-6.997	L5D3_OR_VS_L5D3_Ctr	noSig	NA
1216	KWMTBOMO01216	-0.156	0.426	-0.619	5.67e-01	9.25e-01	-7.323	L5D3_OR_VS_L5D3_Ctr	noSig	LOC110386591
1217	KWMTBOMO01217	0	0	0	1.00e+00	1.00e+00	-7.548	L5D3_OR_VS_L5D3_Ctr	noSig	LOC110385930
1218	KWMTBOMO01218	0	0.005	0	1.00e+00	1.00e+00	-7.548	L5D3_OR_VS_L5D3_Ctr	noSig	LOC101741769
1219	KWMTBOMO01219	-0.055	0.074	-1.148	3.10e-01	6.90e-01	-6.843	L5D3_OR_VS_L5D3_Ctr	noSig	LOC101741488
1220	KWMTBOMO01220	0.033	0.016	1.046	3.50e-01	6.90e-01	-6.95	L5D3_OR_VS_L5D3_Ctr	noSig	LOC101744615
1221	KWMTBOMO01221	0	0.019	0	1.00e+00	1.00e+00	-7.548	L5D3_OR_VS_L5D3_Ctr	noSig	LOC101739560
1222	KWMTBOMO01222	0	0	0	1.00e+00	1.00e+00	-7.548	L5D3_OR_VS_L5D3_Ctr	noSig	LOC101743853
1223	KWMTBOMO01223	0.151	0.576	0.81	4.59e-01	8.09e-01	-7.173	L5D3_OR_VS_L5D3_Ctr	noSig	NA
1224	KWMTBOMO01224	-0.085	0.421	-0.472	6.59e-01	1.00e+00	-7.414	L5D3_OR_VS_L5D3_Ctr	noSig	Ago3
1225	KWMTBOMO01225	0.196	0.449	0.847	4.41e-01	7.88e-01	-7.141	L5D3_OR_VS_L5D3_Ctr	noSig	NA
1226	KWMTBOMO01226	-0.129	4.314	-1.715	1.55e-01	4.84e-01	-6.171	L5D3_OR_VS_L5D3_Ctr	noSig	LOC101743701
1227	KWMTBOMO01227	-0.207	0.403	-1.006	3.66e-01	7.03e-01	-6.99	L5D3_OR_VS_L5D3_Ctr	noSig	NA
1228	KWMTBOMO01228	0.01	0.324	0.093	9.30e-01	1.00e+00	-7.542	L5D3_OR_VS_L5D3_Ctr	noSig	LOC101743559
1229	KWMTBOMO01229	0.151	7.359	0.789	4.71e-01	8.22e-01	-7.191	L5D3_OR_VS_L5D3_Ctr	noSig	LOC101743420
1230	KWMTBOMO01230	-0.603	2.27	-2.372	7.10e-02	3.05e-01	-5.335	L5D3_OR_VS_L5D3_Ctr	noSig	LOC101743279
1231	KWMTBOMO01231	0	0	0	1.00e+00	1.00e+00	-7.548	L5D3_OR_VS_L5D3_Ctr	noSig	LOC101736207
1232	KWMTBOMO01232	-1.066	4.907	-9.236	4.87e-04	2.05e-02	0.444	L5D3_OR_VS_L5D3_Ctr	down	LOC101743136
1233	KWMTBOMO01233	0.11	1.33	0.4	7.08e-01	1.00e+00	-7.451	L5D3_OR_VS_L5D3_Ctr	noSig	LOC101742993
1234	KWMTBOMO01234	-0.12	2.159	-0.402	7.07e-01	1.00e+00	-7.451	L5D3_OR_VS_L5D3_Ctr	noSig	LOC101742852
1235	KWMTBOMO01235	0	0	0	1.00e+00	1.00e+00	-7.548	L5D3_OR_VS_L5D3_Ctr	noSig	LOC101742703
1236	KWMTBOMO01236	-0.555	1.197	-6.396	2.22e-03	3.93e-02	-1.325	L5D3_OR_VS_L5D3_Ctr	down	LOC101739146
1237	KWMTBOMO01237	-0.467	1.071	-2.641	5.23e-02	2.51e-01	-4.996	L5D3_OR_VS_L5D3_Ctr	noSig	LOC110386171
1238	KWMTBOMO01238	0	0	0	1.00e+00	1.00e+00	-7.548	L5D3_OR_VS_L5D3_Ctr	noSig	NA
1239	KWMTBOMO01239	0.005	0.002	0.991	3.73e-01	7.05e-01	-7.006	L5D3_OR_VS_L5D3_Ctr	noSig	NA
1240	KWMTBOMO01240	0.031	1.643	0.054	9.59e-01	1.00e+00	-7.546	L5D3_OR_VS_L5D3_Ctr	noSig	NA
1241	KWMTBOMO01241	0.071	2.969	0.559	6.04e-01	9.65e-01	-7.363	L5D3_OR_VS_L5D3_Ctr	noSig	NA
1242	KWMTBOMO01242	0	0.01	0	1.00e+00	1.00e+00	-7.548	L5D3_OR_VS_L5D3_Ctr	noSig	NA
1243	KWMTBOMO01243	-0.314	3.015	-1.219	2.84e-01	6.90e-01	-6.765	L5D3_OR_VS_L5D3_Ctr	noSig	LOC101738997
1244	KWMTBOMO01244	0	0	0	1.00e+00	1.00e+00	-7.548	L5D3_OR_VS_L5D3_Ctr	noSig	NA
1245	KWMTBOMO01245	0.033	0.031	2.025	1.07e-01	3.84e-01	-5.777	L5D3_OR_VS_L5D3_Ctr	noSig	NA
1246	KWMTBOMO01246	0.014	0.007	1.041	3.52e-01	6.90e-01	-6.955	L5D3_OR_VS_L5D3_Ctr	noSig	NA
1247	KWMTBOMO01247	-0.023	0.012	-1.045	3.50e-01	6.90e-01	-6.951	L5D3_OR_VS_L5D3_Ctr	noSig	LOC101742560
1248	KWMTBOMO01248	-0.164	0.143	-3.148	3.04e-02	1.77e-01	-4.382	L5D3_OR_VS_L5D3_Ctr	noSig	NA
1249	KWMTBOMO01249	-0.297	2.157	-2.909	3.91e-02	2.08e-01	-4.667	L5D3_OR_VS_L5D3_Ctr	noSig	NA
1250	KWMTBOMO01250	0	0	0	1.00e+00	1.00e+00	-7.548	L5D3_OR_VS_L5D3_Ctr	noSig	NA
1251	KWMTBOMO01251	-0.085	0.105	-0.553	6.07e-01	9.69e-01	-7.367	L5D3_OR_VS_L5D3_Ctr	noSig	NA
1252	KWMTBOMO01252	-0.609	3.841	-2.66	5.12e-02	2.48e-01	-4.973	L5D3_OR_VS_L5D3_Ctr	noSig	PKG-I
1253	KWMTBOMO01253	-0.09	0.265	-1.288	2.61e-01	6.66e-01	-6.686	L5D3_OR_VS_L5D3_Ctr	noSig	NA
1254	KWMTBOMO01254	0	0.019	0	1.00e+00	1.00e+00	-7.548	L5D3_OR_VS_L5D3_Ctr	noSig	NA
1255	KWMTBOMO01255	-0.295	1.974	-1.033	3.55e-01	6.90e-01	-6.963	L5D3_OR_VS_L5D3_Ctr	noSig	LOC101742414
1256	KWMTBOMO01256	-0.147	0.102	-0.869	4.30e-01	7.75e-01	-7.121	L5D3_OR_VS_L5D3_Ctr	noSig	LOC101738723
1257	KWMTBOMO01257	0.033	0.016	1.046	3.50e-01	6.90e-01	-6.95	L5D3_OR_VS_L5D3_Ctr	noSig	NA
1258	KWMTBOMO01258	0.056	0.037	2.245	8.21e-02	3.35e-01	-5.495	L5D3_OR_VS_L5D3_Ctr	noSig	LOC101742274
1259	KWMTBOMO01259	0	0	0	1.00e+00	1.00e+00	-7.548	L5D3_OR_VS_L5D3_Ctr	noSig	LOC101738588
1260	KWMTBOMO01260	0.067	0.034	1.047	3.49e-01	6.90e-01	-6.948	L5D3_OR_VS_L5D3_Ctr	noSig	LOC732982
1261	KWMTBOMO01261	0	0	0	1.00e+00	1.00e+00	-7.548	L5D3_OR_VS_L5D3_Ctr	noSig	LOC101742121
1262	KWMTBOMO01262	0.196	0.303	0.517	6.30e-01	9.91e-01	-7.389	L5D3_OR_VS_L5D3_Ctr	noSig	Sp2
1263	KWMTBOMO01263	0.308	0.362	0.736	4.99e-01	8.53e-01	-7.235	L5D3_OR_VS_L5D3_Ctr	noSig	sp3
1264	KWMTBOMO01264	0	0	0	1.00e+00	1.00e+00	-7.548	L5D3_OR_VS_L5D3_Ctr	noSig	LOC101738457
1265	KWMTBOMO01265	0	0	0	1.00e+00	1.00e+00	-7.548	L5D3_OR_VS_L5D3_Ctr	noSig	LOC101741981
1266	KWMTBOMO01266	0	0	0	1.00e+00	1.00e+00	-7.548	L5D3_OR_VS_L5D3_Ctr	noSig	LOC101741552
1267	KWMTBOMO01267	0	0	0	1.00e+00	1.00e+00	-7.548	L5D3_OR_VS_L5D3_Ctr	noSig	NA
1268	KWMTBOMO01268	0	0	0	1.00e+00	1.00e+00	-7.548	L5D3_OR_VS_L5D3_Ctr	noSig	NA
1269	KWMTBOMO01269	-0.071	0.05	-1.116	3.22e-01	6.90e-01	-6.876	L5D3_OR_VS_L5D3_Ctr	noSig	NPLP1
1270	KWMTBOMO01270	-0.839	1.665	-6.849	1.68e-03	3.41e-02	-1	L5D3_OR_VS_L5D3_Ctr	down	LOC101741830
1271	KWMTBOMO01271	-0.306	7.483	-3.106	3.18e-02	1.82e-01	-4.431	L5D3_OR_VS_L5D3_Ctr	noSig	LOC101741544
1272	KWMTBOMO01272	-0.515	3.397	-3.074	3.28e-02	1.85e-01	-4.469	L5D3_OR_VS_L5D3_Ctr	noSig	NA
1273	KWMTBOMO01273	0.062	12.607	0.883	4.23e-01	7.67e-01	-7.109	L5D3_OR_VS_L5D3_Ctr	noSig	RpL13A
1274	KWMTBOMO01274	-0.076	7.017	-0.437	6.83e-01	1.00e+00	-7.433	L5D3_OR_VS_L5D3_Ctr	noSig	LOC101741265
1275	KWMTBOMO01275	0	0	0	1.00e+00	1.00e+00	-7.548	L5D3_OR_VS_L5D3_Ctr	noSig	NA
1276	KWMTBOMO01276	-0.588	3.794	-21.063	1.41e-05	6.98e-03	4.262	L5D3_OR_VS_L5D3_Ctr	down	LOC101741028
1277	KWMTBOMO01277	-0.023	0.059	-0.988	3.74e-01	7.07e-01	-7.008	L5D3_OR_VS_L5D3_Ctr	noSig	LOC101738057
1278	KWMTBOMO01278	-0.092	3.405	-0.481	6.53e-01	1.00e+00	-7.409	L5D3_OR_VS_L5D3_Ctr	noSig	LOC101740657
1279	KWMTBOMO01279	0.185	0.76	1.528	1.95e-01	5.53e-01	-6.402	L5D3_OR_VS_L5D3_Ctr	noSig	LOC105842400
1280	KWMTBOMO01280	-0.156	3.883	-0.809	4.60e-01	8.10e-01	-7.175	L5D3_OR_VS_L5D3_Ctr	noSig	LOC101740517
1281	KWMTBOMO01281	0.144	4.264	1.273	2.66e-01	6.73e-01	-6.704	L5D3_OR_VS_L5D3_Ctr	noSig	LOC692884
1282	KWMTBOMO01282	0	0	0	1.00e+00	1.00e+00	-7.548	L5D3_OR_VS_L5D3_Ctr	noSig	NA
1283	KWMTBOMO01283	-0.082	0.178	-1.283	2.63e-01	6.68e-01	-6.692	L5D3_OR_VS_L5D3_Ctr	noSig	NA
1284	KWMTBOMO01284	-0.113	0.117	-1.938	1.18e-01	4.09e-01	-5.888	L5D3_OR_VS_L5D3_Ctr	noSig	NA
1285	KWMTBOMO01285	0.366	0.193	1.653	1.67e-01	5.05e-01	-6.248	L5D3_OR_VS_L5D3_Ctr	noSig	LOC101740251
1286	KWMTBOMO01286	-0.907	3.126	-6.548	2.02e-03	3.71e-02	-1.214	L5D3_OR_VS_L5D3_Ctr	down	LOC101740113
1287	KWMTBOMO01287	-0.3	5.082	-2.529	5.93e-02	2.72e-01	-5.136	L5D3_OR_VS_L5D3_Ctr	noSig	LOC101737926
1288	KWMTBOMO01288	0.063	0.032	1.047	3.49e-01	6.90e-01	-6.949	L5D3_OR_VS_L5D3_Ctr	noSig	LOC100529205
1289	KWMTBOMO01289	0.103	0.225	0.963	3.85e-01	7.21e-01	-7.032	L5D3_OR_VS_L5D3_Ctr	noSig	LOC110386239
1290	KWMTBOMO01290	-0.054	0.027	-1.047	3.49e-01	6.90e-01	-6.949	L5D3_OR_VS_L5D3_Ctr	noSig	NA
1291	KWMTBOMO01291	-0.669	2.052	-2.623	5.34e-02	2.53e-01	-5.018	L5D3_OR_VS_L5D3_Ctr	noSig	LOC101739889
1292	KWMTBOMO01292	-0.124	0.072	-1.77	1.45e-01	4.63e-01	-6.101	L5D3_OR_VS_L5D3_Ctr	noSig	NA
1293	KWMTBOMO01293	-0.042	0.026	-3.344	2.49e-02	1.56e-01	-4.154	L5D3_OR_VS_L5D3_Ctr	noSig	NA
1294	KWMTBOMO01294	0	0	0	1.00e+00	1.00e+00	-7.548	L5D3_OR_VS_L5D3_Ctr	noSig	LOC110386164
1295	KWMTBOMO01295	0.006	0.067	0.123	9.08e-01	1.00e+00	-7.538	L5D3_OR_VS_L5D3_Ctr	noSig	LOC105841632
1296	KWMTBOMO01296	-0.674	3.345	-4.033	1.30e-02	1.04e-01	-3.401	L5D3_OR_VS_L5D3_Ctr	noSig	LOC101737655
1297	KWMTBOMO01297	-0.568	1.282	-3.184	2.93e-02	1.73e-01	-4.34	L5D3_OR_VS_L5D3_Ctr	noSig	LOC101739473
1298	KWMTBOMO01298	0	0	0	1.00e+00	1.00e+00	-7.548	L5D3_OR_VS_L5D3_Ctr	noSig	NA
1299	KWMTBOMO01299	-0.057	0.057	-0.894	4.18e-01	7.60e-01	-7.098	L5D3_OR_VS_L5D3_Ctr	noSig	NA
1300	KWMTBOMO01300	-0.016	4.075	-0.105	9.21e-01	1.00e+00	-7.541	L5D3_OR_VS_L5D3_Ctr	noSig	LOC101739090
1301	KWMTBOMO01301	-0.768	1.772	-2.952	3.73e-02	2.01e-01	-4.615	L5D3_OR_VS_L5D3_Ctr	noSig	LOC101738678
1302	KWMTBOMO01302	-1.031	3.573	-5.694	3.53e-03	4.97e-02	-1.871	L5D3_OR_VS_L5D3_Ctr	down	LOC101738817
1303	KWMTBOMO01303	-0.121	3.296	-0.672	5.35e-01	8.93e-01	-7.285	L5D3_OR_VS_L5D3_Ctr	noSig	LOC110386167
1304	KWMTBOMO01304	-0.236	7.227	-1.116	3.22e-01	6.90e-01	-6.876	L5D3_OR_VS_L5D3_Ctr	noSig	LOC101738358
1305	KWMTBOMO01305	0.05	0.066	0.825	4.52e-01	8.01e-01	-7.16	L5D3_OR_VS_L5D3_Ctr	noSig	NA
1306	KWMTBOMO01306	0	0.01	0	1.00e+00	1.00e+00	-7.548	L5D3_OR_VS_L5D3_Ctr	noSig	Mir2748
1307	KWMTBOMO01307	0.028	0.114	0.543	6.14e-01	9.76e-01	-7.373	L5D3_OR_VS_L5D3_Ctr	noSig	NA
1308	KWMTBOMO01308	-0.002	0.066	-0.03	9.77e-01	1.00e+00	-7.547	L5D3_OR_VS_L5D3_Ctr	noSig	NA
1309	KWMTBOMO01309	0.019	0.009	1.044	3.51e-01	6.90e-01	-6.952	L5D3_OR_VS_L5D3_Ctr	noSig	LOC110386174
1310	KWMTBOMO01310	0	0	0	1.00e+00	1.00e+00	-7.548	L5D3_OR_VS_L5D3_Ctr	noSig	LOC101738145
1311	KWMTBOMO01311	0	0	0	1.00e+00	1.00e+00	-7.548	L5D3_OR_VS_L5D3_Ctr	noSig	NA
1312	KWMTBOMO01312	-0.031	6.122	-0.166	8.75e-01	1.00e+00	-7.531	L5D3_OR_VS_L5D3_Ctr	noSig	LOC692958
1313	KWMTBOMO01313	-0.012	4.87	-0.047	9.65e-01	1.00e+00	-7.546	L5D3_OR_VS_L5D3_Ctr	noSig	Cmc1
1314	KWMTBOMO01314	-0.687	2.521	-3.789	1.63e-02	1.20e-01	-3.659	L5D3_OR_VS_L5D3_Ctr	noSig	LOC101738015
1315	KWMTBOMO01315	-0.602	5.844	-4.243	1.08e-02	9.33e-02	-3.186	L5D3_OR_VS_L5D3_Ctr	noSig	LOC101742745
1316	KWMTBOMO01316	0.037	0.019	1.047	3.49e-01	6.90e-01	-6.949	L5D3_OR_VS_L5D3_Ctr	noSig	NA
1317	KWMTBOMO01317	-0.236	3.558	-3.461	2.22e-02	1.45e-01	-4.021	L5D3_OR_VS_L5D3_Ctr	noSig	LOC101737226
1318	KWMTBOMO01318	-0.283	1.757	-1.008	3.66e-01	7.03e-01	-6.988	L5D3_OR_VS_L5D3_Ctr	noSig	LOC101737083
1319	KWMTBOMO01319	-0.199	0.735	-0.647	5.50e-01	9.06e-01	-7.303	L5D3_OR_VS_L5D3_Ctr	noSig	NA
1320	KWMTBOMO01320	0.114	12.125	3.093	3.22e-02	1.83e-01	-4.446	L5D3_OR_VS_L5D3_Ctr	noSig	RpL11
1321	KWMTBOMO01321	-0.581	1.788	-5.679	3.57e-03	4.99e-02	-1.882	L5D3_OR_VS_L5D3_Ctr	down	NA
1322	KWMTBOMO01322	-0.81	2.225	-1.923	1.20e-01	4.14e-01	-5.907	L5D3_OR_VS_L5D3_Ctr	noSig	NA
1323	KWMTBOMO01323	-0.958	2.488	-4.481	8.86e-03	8.36e-02	-2.951	L5D3_OR_VS_L5D3_Ctr	noSig	LOC101737654
1324	KWMTBOMO01324	-0.283	0.32	-1.351	2.42e-01	6.33e-01	-6.614	L5D3_OR_VS_L5D3_Ctr	noSig	LOC110386892
1325	KWMTBOMO01325	-0.359	1.292	-2.253	8.14e-02	3.33e-01	-5.485	L5D3_OR_VS_L5D3_Ctr	noSig	LOC101737513
1326	KWMTBOMO01326	0.011	0.667	0.053	9.60e-01	1.00e+00	-7.546	L5D3_OR_VS_L5D3_Ctr	noSig	NA
1327	KWMTBOMO01327	-0.555	1.925	-5.921	3.02e-03	4.60e-02	-1.688	L5D3_OR_VS_L5D3_Ctr	down	NA
1328	KWMTBOMO01328	-0.197	2.259	-1.757	1.47e-01	4.68e-01	-6.117	L5D3_OR_VS_L5D3_Ctr	noSig	LOC101736949
1329	KWMTBOMO01329	0	0	0	1.00e+00	1.00e+00	-7.548	L5D3_OR_VS_L5D3_Ctr	noSig	LOC101736819
1330	KWMTBOMO01330	0	0	0	1.00e+00	1.00e+00	-7.548	L5D3_OR_VS_L5D3_Ctr	noSig	LOC101737374
1331	KWMTBOMO01331	-0.341	2.974	-1.558	1.88e-01	5.40e-01	-6.366	L5D3_OR_VS_L5D3_Ctr	noSig	LOC101737123
1332	KWMTBOMO01332	-0.507	2.846	-2.392	6.93e-02	3.00e-01	-5.309	L5D3_OR_VS_L5D3_Ctr	noSig	NA
1333	KWMTBOMO01333	-1.401	5.28	-20.365	1.63e-05	7.31e-03	4.121	L5D3_OR_VS_L5D3_Ctr	down	LOC101736729
1334	KWMTBOMO01334	-1.138	4.125	-4.525	8.54e-03	8.18e-02	-2.909	L5D3_OR_VS_L5D3_Ctr	noSig	LOC101736586
1335	KWMTBOMO01335	-0.351	5.603	-2.289	7.81e-02	3.25e-01	-5.439	L5D3_OR_VS_L5D3_Ctr	noSig	LOC692940
1336	KWMTBOMO01336	0	0	0	1.00e+00	1.00e+00	-7.548	L5D3_OR_VS_L5D3_Ctr	noSig	LOC101736686
1337	KWMTBOMO01337	0	0	0	1.00e+00	1.00e+00	-7.548	L5D3_OR_VS_L5D3_Ctr	noSig	LOC101736548
1338	KWMTBOMO01338	0	0	0	1.00e+00	1.00e+00	-7.548	L5D3_OR_VS_L5D3_Ctr	noSig	LOC101736456
1339	KWMTBOMO01339	0	0	0	1.00e+00	1.00e+00	-7.548	L5D3_OR_VS_L5D3_Ctr	noSig	NA
1340	KWMTBOMO01340	-1.822	2.377	-6.501	2.08e-03	3.76e-02	-1.248	L5D3_OR_VS_L5D3_Ctr	down	NA
1341	KWMTBOMO01341	-2.408	2.116	-8.184	8.08e-04	2.50e-02	-0.143	L5D3_OR_VS_L5D3_Ctr	down	LOC101736421
1342	KWMTBOMO01342	-0.282	0.169	-1.874	1.28e-01	4.30e-01	-5.97	L5D3_OR_VS_L5D3_Ctr	noSig	LOC101739349
1343	KWMTBOMO01343	-0.04	0.126	-0.881	4.24e-01	7.68e-01	-7.111	L5D3_OR_VS_L5D3_Ctr	noSig	LOC101737180
1344	KWMTBOMO01344	-0.78	3.496	-2.862	4.11e-02	2.15e-01	-4.724	L5D3_OR_VS_L5D3_Ctr	noSig	LOC101736064
1345	KWMTBOMO01345	-0.049	0.079	-0.439	6.82e-01	1.00e+00	-7.432	L5D3_OR_VS_L5D3_Ctr	noSig	LOC101735939
1346	KWMTBOMO01346	-0.492	5.832	-1.329	2.49e-01	6.44e-01	-6.639	L5D3_OR_VS_L5D3_Ctr	noSig	LOC101735811
1347	KWMTBOMO01347	-0.564	3.637	-6.02	2.83e-03	4.46e-02	-1.611	L5D3_OR_VS_L5D3_Ctr	down	LOC101735666
1348	KWMTBOMO01348	-1.165	2.718	-6.299	2.36e-03	4.07e-02	-1.398	L5D3_OR_VS_L5D3_Ctr	down	NA
1349	KWMTBOMO01349	-1.191	0.95	-4.648	7.72e-03	7.69e-02	-2.79	L5D3_OR_VS_L5D3_Ctr	noSig	LOC101735348
1350	KWMTBOMO01350	-1.027	2.053	-6.071	2.74e-03	4.38e-02	-1.571	L5D3_OR_VS_L5D3_Ctr	down	NA
1351	KWMTBOMO01351	-0.668	7.429	-5.449	4.20e-03	5.39e-02	-2.074	L5D3_OR_VS_L5D3_Ctr	noSig	LOC101746919
1352	KWMTBOMO01352	-0.502	4.848	-2.847	4.18e-02	2.17e-01	-4.742	L5D3_OR_VS_L5D3_Ctr	noSig	LOC101747049
1353	KWMTBOMO01353	-0.653	1.829	-2.506	6.09e-02	2.76e-01	-5.165	L5D3_OR_VS_L5D3_Ctr	noSig	LOC101736021
1354	KWMTBOMO01354	-0.896	1.383	-4.812	6.77e-03	7.13e-02	-2.636	L5D3_OR_VS_L5D3_Ctr	noSig	LOC101735893
1355	KWMTBOMO01355	-0.191	1.564	-1.278	2.65e-01	6.70e-01	-6.698	L5D3_OR_VS_L5D3_Ctr	noSig	LOC101746778
1356	KWMTBOMO01356	0	0	0	1.00e+00	1.00e+00	-7.548	L5D3_OR_VS_L5D3_Ctr	noSig	NA
1357	KWMTBOMO01357	0	0	0	1.00e+00	1.00e+00	-7.548	L5D3_OR_VS_L5D3_Ctr	noSig	LOC101735622
1358	KWMTBOMO01358	-0.025	0.212	-0.194	8.55e-01	1.00e+00	-7.525	L5D3_OR_VS_L5D3_Ctr	noSig	LOC101739034
1359	KWMTBOMO01359	-0.303	2.457	-1.015	3.63e-01	6.99e-01	-6.981	L5D3_OR_VS_L5D3_Ctr	noSig	LOC101746494
1360	KWMTBOMO01360	-0.377	0.471	-5.01	5.81e-03	6.51e-02	-2.456	L5D3_OR_VS_L5D3_Ctr	noSig	LOC101746638
1361	KWMTBOMO01361	-0.863	3.896	-8.89	5.72e-04	2.17e-02	0.259	L5D3_OR_VS_L5D3_Ctr	down	LOC732883
1362	KWMTBOMO01362	-0.573	2.01	-4.423	9.30e-03	8.57e-02	-3.007	L5D3_OR_VS_L5D3_Ctr	noSig	LOC101746212
1363	KWMTBOMO01363	0	0	0	1.00e+00	1.00e+00	-7.548	L5D3_OR_VS_L5D3_Ctr	noSig	twi
1364	KWMTBOMO01364	-0.005	0.002	-0.991	3.73e-01	7.05e-01	-7.006	L5D3_OR_VS_L5D3_Ctr	noSig	NA
1365	KWMTBOMO01365	-0.862	1.601	-4.88	6.42e-03	6.94e-02	-2.574	L5D3_OR_VS_L5D3_Ctr	noSig	LOC101745736
1366	KWMTBOMO01366	-1.158	2.405	-4.971	5.99e-03	6.62e-02	-2.492	L5D3_OR_VS_L5D3_Ctr	noSig	LOC101745979
1367	KWMTBOMO01367	-0.504	2.756	-2.736	4.71e-02	2.35e-01	-4.878	L5D3_OR_VS_L5D3_Ctr	noSig	LOC101745583
1368	KWMTBOMO01368	0.058	5.968	0.182	8.64e-01	1.00e+00	-7.528	L5D3_OR_VS_L5D3_Ctr	noSig	LOC110386132
1369	KWMTBOMO01369	-0.014	0.007	-1.041	3.52e-01	6.90e-01	-6.955	L5D3_OR_VS_L5D3_Ctr	noSig	LOC101735487
1370	KWMTBOMO01370	-0.702	2.848	-1.962	1.15e-01	4.02e-01	-5.857	L5D3_OR_VS_L5D3_Ctr	noSig	LOC101745440
1371	KWMTBOMO01371	-0.111	0.205	-0.424	6.92e-01	1.00e+00	-7.44	L5D3_OR_VS_L5D3_Ctr	noSig	LOC101745197
1372	KWMTBOMO01372	-0.028	0.363	-0.118	9.11e-01	1.00e+00	-7.539	L5D3_OR_VS_L5D3_Ctr	noSig	NA
1373	KWMTBOMO01373	-0.059	0.097	-0.432	6.86e-01	1.00e+00	-7.436	L5D3_OR_VS_L5D3_Ctr	noSig	NA
1374	KWMTBOMO01374	0.037	0.037	1.121	3.20e-01	6.90e-01	-6.871	L5D3_OR_VS_L5D3_Ctr	noSig	NA
1375	KWMTBOMO01375	-0.467	1.902	-2.165	9.03e-02	3.55e-01	-5.598	L5D3_OR_VS_L5D3_Ctr	noSig	LOC101745050
1376	KWMTBOMO01376	-0.233	0.689	-1.419	2.23e-01	6.00e-01	-6.534	L5D3_OR_VS_L5D3_Ctr	noSig	LOC101744815
1377	KWMTBOMO01377	-0.107	0.054	-1.047	3.49e-01	6.90e-01	-6.948	L5D3_OR_VS_L5D3_Ctr	noSig	NA
1378	KWMTBOMO01378	0	0	0	1.00e+00	1.00e+00	-7.548	L5D3_OR_VS_L5D3_Ctr	noSig	LOC101744577
1379	KWMTBOMO01379	-0.143	5.552	-0.352	7.41e-01	1.00e+00	-7.473	L5D3_OR_VS_L5D3_Ctr	noSig	LOC101744429
1380	KWMTBOMO01380	0.124	5.31	0.335	7.53e-01	1.00e+00	-7.48	L5D3_OR_VS_L5D3_Ctr	noSig	NA
1381	KWMTBOMO01381	1.406	13.381	9.452	4.42e-04	1.99e-02	0.556	L5D3_OR_VS_L5D3_Ctr	up	RpL37A
1382	KWMTBOMO01382	-0.684	3.731	-4.844	6.61e-03	7.02e-02	-2.607	L5D3_OR_VS_L5D3_Ctr	noSig	LOC101744286
1383	KWMTBOMO01383	0.178	2.71	0.449	6.75e-01	1.00e+00	-7.427	L5D3_OR_VS_L5D3_Ctr	noSig	NA
1384	KWMTBOMO01384	0.168	3.148	0.329	7.57e-01	1.00e+00	-7.482	L5D3_OR_VS_L5D3_Ctr	noSig	LOC101744145
1385	KWMTBOMO01385	-0.232	2.811	-1.151	3.09e-01	6.90e-01	-6.839	L5D3_OR_VS_L5D3_Ctr	noSig	LOC101744000
1386	KWMTBOMO01386	-0.112	0.125	-2.234	8.33e-02	3.38e-01	-5.51	L5D3_OR_VS_L5D3_Ctr	noSig	K5
1387	KWMTBOMO01387	-2.089	2.693	-13.93	8.44e-05	1.14e-02	2.417	L5D3_OR_VS_L5D3_Ctr	down	LOC101743700
1388	KWMTBOMO01388	-0.019	0.009	-1.044	3.51e-01	6.90e-01	-6.952	L5D3_OR_VS_L5D3_Ctr	noSig	NA
1389	KWMTBOMO01389	-0.019	0.009	-1.044	3.51e-01	6.90e-01	-6.952	L5D3_OR_VS_L5D3_Ctr	noSig	LOC105842405
1390	KWMTBOMO01390	-0.012	0.097	-0.111	9.16e-01	1.00e+00	-7.54	L5D3_OR_VS_L5D3_Ctr	noSig	LOC101735349
1391	KWMTBOMO01391	-0.014	0.036	-1.776	1.44e-01	4.62e-01	-6.094	L5D3_OR_VS_L5D3_Ctr	noSig	LOC110385653
1392	KWMTBOMO01392	0	0	0	1.00e+00	1.00e+00	-7.548	L5D3_OR_VS_L5D3_Ctr	noSig	LOC101743472
1393	KWMTBOMO01393	0.105	0.053	1.207	2.88e-01	6.90e-01	-6.778	L5D3_OR_VS_L5D3_Ctr	noSig	NA
1394	KWMTBOMO01394	0	0	0	1.00e+00	1.00e+00	-7.548	L5D3_OR_VS_L5D3_Ctr	noSig	Run
1395	KWMTBOMO01395	0	0	0	1.00e+00	1.00e+00	-7.548	L5D3_OR_VS_L5D3_Ctr	noSig	LOC101747006
1396	KWMTBOMO01396	-0.378	3.713	-2.433	6.61e-02	2.92e-01	-5.257	L5D3_OR_VS_L5D3_Ctr	noSig	LOC101743092
1397	KWMTBOMO01397	-0.579	0.725	-3.176	2.95e-02	1.74e-01	-4.349	L5D3_OR_VS_L5D3_Ctr	noSig	LOC101746731
1398	KWMTBOMO01398	-0.067	0.076	-1.163	3.04e-01	6.90e-01	-6.827	L5D3_OR_VS_L5D3_Ctr	noSig	Mf-cpa
1399	KWMTBOMO01399	-0.486	0.558	-1.286	2.62e-01	6.67e-01	-6.689	L5D3_OR_VS_L5D3_Ctr	noSig	NA
1400	KWMTBOMO01400	-0.129	1.769	-0.624	5.64e-01	9.22e-01	-7.32	L5D3_OR_VS_L5D3_Ctr	noSig	LOC101742807
1401	KWMTBOMO01401	-0.023	1.01	-0.179	8.66e-01	1.00e+00	-7.528	L5D3_OR_VS_L5D3_Ctr	noSig	LOC101742559
1402	KWMTBOMO01402	-0.657	1.718	-4.528	8.52e-03	8.18e-02	-2.905	L5D3_OR_VS_L5D3_Ctr	noSig	LOC101742413
1403	KWMTBOMO01403	-0.524	1.94	-1.627	1.73e-01	5.16e-01	-6.28	L5D3_OR_VS_L5D3_Ctr	noSig	LOC101746590
1404	KWMTBOMO01404	-0.065	0.032	-1.697	1.59e-01	4.91e-01	-6.193	L5D3_OR_VS_L5D3_Ctr	noSig	LOC110386274
1405	KWMTBOMO01405	0	0	0	1.00e+00	1.00e+00	-7.548	L5D3_OR_VS_L5D3_Ctr	noSig	LOC101746308
1406	KWMTBOMO01406	0.43	5.824	1.576	1.84e-01	5.34e-01	-6.344	L5D3_OR_VS_L5D3_Ctr	noSig	LOC732955
1407	KWMTBOMO01407	-0.304	4.247	-0.975	3.80e-01	7.14e-01	-7.021	L5D3_OR_VS_L5D3_Ctr	noSig	LOC101742077
1408	KWMTBOMO01408	0.164	7.544	0.473	6.59e-01	1.00e+00	-7.414	L5D3_OR_VS_L5D3_Ctr	noSig	E(spl)mbeta
1409	KWMTBOMO01409	0.071	0.433	0.272	7.98e-01	1.00e+00	-7.503	L5D3_OR_VS_L5D3_Ctr	noSig	E(spl)malpha
1410	KWMTBOMO01410	0	0	0	1.00e+00	1.00e+00	-7.548	L5D3_OR_VS_L5D3_Ctr	noSig	NA
1411	KWMTBOMO01411	0	0	0	1.00e+00	1.00e+00	-7.548	L5D3_OR_VS_L5D3_Ctr	noSig	LOC101741933
1412	KWMTBOMO01412	-0.932	1.147	-5.496	4.06e-03	5.32e-02	-2.035	L5D3_OR_VS_L5D3_Ctr	noSig	LOC101741784
1413	KWMTBOMO01413	0.08	0.099	0.919	4.06e-01	7.46e-01	-7.075	L5D3_OR_VS_L5D3_Ctr	noSig	LOC100302605
1414	KWMTBOMO01414	0.045	0.296	0.538	6.17e-01	9.78e-01	-7.376	L5D3_OR_VS_L5D3_Ctr	noSig	LOC100302603
1415	KWMTBOMO01415	-0.592	0.966	-0.805	4.62e-01	8.13e-01	-7.178	L5D3_OR_VS_L5D3_Ctr	noSig	NA
1416	KWMTBOMO01416	0	0	0	1.00e+00	1.00e+00	-7.548	L5D3_OR_VS_L5D3_Ctr	noSig	NA
1417	KWMTBOMO01417	0	0	0	1.00e+00	1.00e+00	-7.548	L5D3_OR_VS_L5D3_Ctr	noSig	LOC101740981
1418	KWMTBOMO01418	0	0	0	1.00e+00	1.00e+00	-7.548	L5D3_OR_VS_L5D3_Ctr	noSig	LOC101741123
1419	KWMTBOMO01419	-0.033	0.016	-1.046	3.50e-01	6.90e-01	-6.95	L5D3_OR_VS_L5D3_Ctr	noSig	LOC101746018
1420	KWMTBOMO01420	-0.183	7.302	-1.219	2.84e-01	6.90e-01	-6.764	L5D3_OR_VS_L5D3_Ctr	noSig	LOC100174851
1421	KWMTBOMO01421	-0.01	0.005	-1.032	3.55e-01	6.90e-01	-6.964	L5D3_OR_VS_L5D3_Ctr	noSig	LOC101745882
1422	KWMTBOMO01422	-0.071	0.46	-0.932	4.00e-01	7.38e-01	-7.063	L5D3_OR_VS_L5D3_Ctr	noSig	LOC101740837
1423	KWMTBOMO01423	-0.477	5.685	-1.703	1.57e-01	4.88e-01	-6.185	L5D3_OR_VS_L5D3_Ctr	noSig	LOC101740562
1424	KWMTBOMO01424	0.185	11.401	1.618	1.75e-01	5.20e-01	-6.291	L5D3_OR_VS_L5D3_Ctr	noSig	Ef1beta
1425	KWMTBOMO01425	-0.21	3.684	-1.022	3.60e-01	6.95e-01	-6.974	L5D3_OR_VS_L5D3_Ctr	noSig	LOC101740340
1426	KWMTBOMO01426	0.054	0.185	0.282	7.91e-01	1.00e+00	-7.499	L5D3_OR_VS_L5D3_Ctr	noSig	NA
1427	KWMTBOMO01427	-0.033	0.016	-1.046	3.50e-01	6.90e-01	-6.95	L5D3_OR_VS_L5D3_Ctr	noSig	LOC101745584
1428	KWMTBOMO01428	-0.091	2.487	-0.347	7.44e-01	1.00e+00	-7.475	L5D3_OR_VS_L5D3_Ctr	noSig	NA
1429	KWMTBOMO01429	0.134	1.955	0.424	6.91e-01	1.00e+00	-7.44	L5D3_OR_VS_L5D3_Ctr	noSig	LOC101745441
1430	KWMTBOMO01430	-0.517	4.664	-4.246	1.08e-02	9.31e-02	-3.183	L5D3_OR_VS_L5D3_Ctr	noSig	LOC101740208
1431	KWMTBOMO01431	0	9.833	-0.001	9.99e-01	1.00e+00	-7.548	L5D3_OR_VS_L5D3_Ctr	noSig	LOC101739703
1432	KWMTBOMO01432	-0.014	0.007	-1.041	3.52e-01	6.90e-01	-6.955	L5D3_OR_VS_L5D3_Ctr	noSig	LOC101745301
1433	KWMTBOMO01433	-1.834	4.13	-9.25	4.84e-04	2.05e-02	0.452	L5D3_OR_VS_L5D3_Ctr	down	LOC101739559
1434	KWMTBOMO01434	-0.365	2.075	-2.022	1.07e-01	3.85e-01	-5.78	L5D3_OR_VS_L5D3_Ctr	noSig	LOC101739194
1435	KWMTBOMO01435	-0.329	1.966	-1.35	2.42e-01	6.33e-01	-6.615	L5D3_OR_VS_L5D3_Ctr	noSig	TOR2
1436	KWMTBOMO01436	-1.781	7.504	-3.967	1.38e-02	1.08e-01	-3.47	L5D3_OR_VS_L5D3_Ctr	noSig	LOC692798
1437	KWMTBOMO01437	-0.658	1.243	-3.295	2.62e-02	1.61e-01	-4.21	L5D3_OR_VS_L5D3_Ctr	noSig	TOR1
1438	KWMTBOMO01438	-0.874	3.313	-2.649	5.19e-02	2.50e-01	-4.986	L5D3_OR_VS_L5D3_Ctr	noSig	NA
1439	KWMTBOMO01439	-0.973	3.461	-4.426	9.27e-03	8.56e-02	-3.005	L5D3_OR_VS_L5D3_Ctr	noSig	LOC101739047
1440	KWMTBOMO01440	-0.579	4.307	-4.459	9.02e-03	8.42e-02	-2.972	L5D3_OR_VS_L5D3_Ctr	noSig	LOC101738677
1441	KWMTBOMO01441	0	0	0	1.00e+00	1.00e+00	-7.548	L5D3_OR_VS_L5D3_Ctr	noSig	LOC101738547
1442	KWMTBOMO01442	0	0	0	1.00e+00	1.00e+00	-7.548	L5D3_OR_VS_L5D3_Ctr	noSig	LOC101738413
1443	KWMTBOMO01443	0	0	0	1.00e+00	1.00e+00	-7.548	L5D3_OR_VS_L5D3_Ctr	noSig	NA
1444	KWMTBOMO01444	-0.636	2.783	-5.187	5.08e-03	6.03e-02	-2.299	L5D3_OR_VS_L5D3_Ctr	noSig	LOC101745004
1445	KWMTBOMO01445	-0.659	2.55	-2.013	1.08e-01	3.87e-01	-5.792	L5D3_OR_VS_L5D3_Ctr	noSig	LOC101738183
1446	KWMTBOMO01446	-0.843	2.404	-2.914	3.89e-02	2.07e-01	-4.66	L5D3_OR_VS_L5D3_Ctr	noSig	LOC101744865
1447	KWMTBOMO01447	0.221	0.11	2.571	5.66e-02	2.63e-01	-5.083	L5D3_OR_VS_L5D3_Ctr	noSig	NA
1448	KWMTBOMO01448	0.038	0.019	2.087	9.90e-02	3.72e-01	-5.697	L5D3_OR_VS_L5D3_Ctr	noSig	LOC101738056
1449	KWMTBOMO01449	0	0	0	1.00e+00	1.00e+00	-7.548	L5D3_OR_VS_L5D3_Ctr	noSig	NA
1450	KWMTBOMO01450	0	0	0	1.00e+00	1.00e+00	-7.548	L5D3_OR_VS_L5D3_Ctr	noSig	NA
1451	KWMTBOMO01451	0	0.005	0	1.00e+00	1.00e+00	-7.548	L5D3_OR_VS_L5D3_Ctr	noSig	NA
1452	KWMTBOMO01452	-1.163	5.877	-8.316	7.56e-04	2.40e-02	-0.065	L5D3_OR_VS_L5D3_Ctr	down	LOC101737924
1453	KWMTBOMO01453	-0.012	1.339	-0.033	9.75e-01	1.00e+00	-7.547	L5D3_OR_VS_L5D3_Ctr	noSig	LOC101737791
1454	KWMTBOMO01454	-0.3	0.192	-4.863	6.51e-03	6.98e-02	-2.59	L5D3_OR_VS_L5D3_Ctr	noSig	NA
1455	KWMTBOMO01455	-1.146	1.026	-2.745	4.67e-02	2.33e-01	-4.868	L5D3_OR_VS_L5D3_Ctr	noSig	LOC101737653
1456	KWMTBOMO01456	-0.821	1.372	-7.035	1.51e-03	3.28e-02	-0.872	L5D3_OR_VS_L5D3_Ctr	down	LOC101744578
1457	KWMTBOMO01457	-0.72	1.367	-1.927	1.20e-01	4.13e-01	-5.902	L5D3_OR_VS_L5D3_Ctr	noSig	NA
1458	KWMTBOMO01458	0	0	0	1.00e+00	1.00e+00	-7.548	L5D3_OR_VS_L5D3_Ctr	noSig	LOC101737512
1459	KWMTBOMO01459	-0.028	0.014	-1.046	3.50e-01	6.90e-01	-6.95	L5D3_OR_VS_L5D3_Ctr	noSig	NA
1460	KWMTBOMO01460	0.041	0.021	1.047	3.49e-01	6.90e-01	-6.949	L5D3_OR_VS_L5D3_Ctr	noSig	NA
1461	KWMTBOMO01461	0	0	0	1.00e+00	1.00e+00	-7.548	L5D3_OR_VS_L5D3_Ctr	noSig	NA
1462	KWMTBOMO01462	0	0	0	1.00e+00	1.00e+00	-7.548	L5D3_OR_VS_L5D3_Ctr	noSig	NGR-A34
1463	KWMTBOMO01463	0	0	0	1.00e+00	1.00e+00	-7.548	L5D3_OR_VS_L5D3_Ctr	noSig	LOC101737373
1464	KWMTBOMO01464	-0.014	0.007	-1.041	3.52e-01	6.90e-01	-6.955	L5D3_OR_VS_L5D3_Ctr	noSig	LOC101744430
1465	KWMTBOMO01465	-0.087	0.043	-1.785	1.42e-01	4.60e-01	-6.083	L5D3_OR_VS_L5D3_Ctr	noSig	LOC101744146
1466	KWMTBOMO01466	0	0	0	1.00e+00	1.00e+00	-7.548	L5D3_OR_VS_L5D3_Ctr	noSig	LOC105842389
1467	KWMTBOMO01467	0	0	0	1.00e+00	1.00e+00	-7.548	L5D3_OR_VS_L5D3_Ctr	noSig	LOC105842394
1468	KWMTBOMO01468	-0.159	1.572	-0.417	6.97e-01	1.00e+00	-7.443	L5D3_OR_VS_L5D3_Ctr	noSig	LOC101744001
1469	KWMTBOMO01469	0	0	0	1.00e+00	1.00e+00	-7.548	L5D3_OR_VS_L5D3_Ctr	noSig	NA
1470	KWMTBOMO01470	0	0	0	1.00e+00	1.00e+00	-7.548	L5D3_OR_VS_L5D3_Ctr	noSig	NGR-A15
1471	KWMTBOMO01471	-0.374	0.408	-2.109	9.65e-02	3.70e-01	-5.67	L5D3_OR_VS_L5D3_Ctr	noSig	NA
1472	KWMTBOMO01472	-0.459	5.42	-5.564	3.87e-03	5.23e-02	-1.978	L5D3_OR_VS_L5D3_Ctr	noSig	LOC101735414
1473	KWMTBOMO01473	-1.811	1.52	-9.79	3.81e-04	1.94e-02	0.727	L5D3_OR_VS_L5D3_Ctr	down	ATOH8
1474	KWMTBOMO01474	0.005	0.035	0.14	8.95e-01	1.00e+00	-7.536	L5D3_OR_VS_L5D3_Ctr	noSig	NA
1475	KWMTBOMO01475	0.019	0.009	1.575	1.84e-01	5.34e-01	-6.344	L5D3_OR_VS_L5D3_Ctr	noSig	NA
1476	KWMTBOMO01476	-0.233	3.062	-1.088	3.33e-01	6.90e-01	-6.907	L5D3_OR_VS_L5D3_Ctr	noSig	LOC101744454
1477	KWMTBOMO01477	0.071	0.036	1.047	3.49e-01	6.90e-01	-6.948	L5D3_OR_VS_L5D3_Ctr	noSig	NA
1478	KWMTBOMO01478	-0.105	0.311	-0.603	5.77e-01	9.36e-01	-7.334	L5D3_OR_VS_L5D3_Ctr	noSig	LOC101744216
1479	KWMTBOMO01479	-0.124	3.466	-0.648	5.49e-01	9.06e-01	-7.302	L5D3_OR_VS_L5D3_Ctr	noSig	LOC101744073
1480	KWMTBOMO01480	-0.659	1.749	-2.32	7.53e-02	3.17e-01	-5.4	L5D3_OR_VS_L5D3_Ctr	noSig	LOC101743924
1481	KWMTBOMO01481	-0.922	5.18	-5.912	3.04e-03	4.60e-02	-1.696	L5D3_OR_VS_L5D3_Ctr	down	LOC101743775
1482	KWMTBOMO01482	-0.936	6.608	-8.809	5.94e-04	2.18e-02	0.214	L5D3_OR_VS_L5D3_Ctr	down	LOC110384926
1483	KWMTBOMO01483	-0.269	0.135	-1.048	3.49e-01	6.90e-01	-6.948	L5D3_OR_VS_L5D3_Ctr	noSig	LOC101743069
1484	KWMTBOMO01484	-0.079	0.077	-1.013	3.64e-01	7.01e-01	-6.983	L5D3_OR_VS_L5D3_Ctr	noSig	LOC101742927
1485	KWMTBOMO01485	-0.26	1.916	-1.153	3.08e-01	6.90e-01	-6.837	L5D3_OR_VS_L5D3_Ctr	noSig	LOC101742776
1486	KWMTBOMO01486	-1.114	4.118	-4.958	6.04e-03	6.66e-02	-2.503	L5D3_OR_VS_L5D3_Ctr	noSig	LOC101742633
1487	KWMTBOMO01487	-0.977	1.694	-7.513	1.15e-03	2.87e-02	-0.556	L5D3_OR_VS_L5D3_Ctr	down	LOC101742487
1488	KWMTBOMO01488	0.249	2.488	1.059	3.45e-01	6.90e-01	-6.937	L5D3_OR_VS_L5D3_Ctr	noSig	LOC101742149
1489	KWMTBOMO01489	0.081	2.707	0.284	7.89e-01	1.00e+00	-7.499	L5D3_OR_VS_L5D3_Ctr	noSig	NA
1490	KWMTBOMO01490	-0.283	0.141	-1.048	3.49e-01	6.90e-01	-6.948	L5D3_OR_VS_L5D3_Ctr	noSig	LOC101747070
1491	KWMTBOMO01491	-0.61	3.553	-11.22	2.13e-04	1.62e-02	1.387	L5D3_OR_VS_L5D3_Ctr	down	LOC101742007
1492	KWMTBOMO01492	-0.032	0.025	-0.786	4.72e-01	8.23e-01	-7.194	L5D3_OR_VS_L5D3_Ctr	noSig	NA
1493	KWMTBOMO01493	0.014	0.007	1.041	3.52e-01	6.90e-01	-6.955	L5D3_OR_VS_L5D3_Ctr	noSig	NA
1494	KWMTBOMO01494	0.681	1.677	2.224	8.42e-02	3.40e-01	-5.522	L5D3_OR_VS_L5D3_Ctr	noSig	LOC101741857
1495	KWMTBOMO01495	0	0	0	1.00e+00	1.00e+00	-7.548	L5D3_OR_VS_L5D3_Ctr	noSig	LOC101741709
1496	KWMTBOMO01496	0	0	0	1.00e+00	1.00e+00	-7.548	L5D3_OR_VS_L5D3_Ctr	noSig	NA
1497	KWMTBOMO01497	0	0	0	1.00e+00	1.00e+00	-7.548	L5D3_OR_VS_L5D3_Ctr	noSig	LOC101741563
1498	KWMTBOMO01498	0	0	0	1.00e+00	1.00e+00	-7.548	L5D3_OR_VS_L5D3_Ctr	noSig	NA
1499	KWMTBOMO01499	0.05	0.063	1.372	2.36e-01	6.24e-01	-6.589	L5D3_OR_VS_L5D3_Ctr	noSig	NA
1500	KWMTBOMO01500	0.019	0.051	0.336	7.53e-01	1.00e+00	-7.48	L5D3_OR_VS_L5D3_Ctr	noSig	NA
1501	KWMTBOMO01501	-0.041	0.021	-1.047	3.49e-01	6.90e-01	-6.949	L5D3_OR_VS_L5D3_Ctr	noSig	LOC101741290
1502	KWMTBOMO01502	-0.616	5.386	-2.772	4.53e-02	2.29e-01	-4.833	L5D3_OR_VS_L5D3_Ctr	noSig	GSTs2
1503	KWMTBOMO01503	0.017	0.954	0.085	9.36e-01	1.00e+00	-7.543	L5D3_OR_VS_L5D3_Ctr	noSig	GSTs1
1504	KWMTBOMO01504	0	0	0	1.00e+00	1.00e+00	-7.548	L5D3_OR_VS_L5D3_Ctr	noSig	LOC105841373
1505	KWMTBOMO01505	-0.687	3.019	-2.672	5.06e-02	2.47e-01	-4.958	L5D3_OR_VS_L5D3_Ctr	noSig	LOC101741054
1506	KWMTBOMO01506	-0.999	3.065	-4.071	1.26e-02	1.02e-01	-3.362	L5D3_OR_VS_L5D3_Ctr	noSig	LOC101740913
1507	KWMTBOMO01507	0	0	0	1.00e+00	1.00e+00	-7.548	L5D3_OR_VS_L5D3_Ctr	noSig	NA
1508	KWMTBOMO01508	0	0	0	1.00e+00	1.00e+00	-7.548	L5D3_OR_VS_L5D3_Ctr	noSig	LOC101746937
1509	KWMTBOMO01509	0	0	0	1.00e+00	1.00e+00	-7.548	L5D3_OR_VS_L5D3_Ctr	noSig	NA
1510	KWMTBOMO01510	-0.046	0.023	-1.047	3.49e-01	6.90e-01	-6.949	L5D3_OR_VS_L5D3_Ctr	noSig	LOC101746797
1511	KWMTBOMO01511	0	0	0	1.00e+00	1.00e+00	-7.548	L5D3_OR_VS_L5D3_Ctr	noSig	LOC101746657
1512	KWMTBOMO01512	-0.145	1.367	-0.66	5.42e-01	9.00e-01	-7.293	L5D3_OR_VS_L5D3_Ctr	noSig	LOC101740774
1513	KWMTBOMO01513	0.481	3.052	2.274	7.95e-02	3.28e-01	-5.459	L5D3_OR_VS_L5D3_Ctr	noSig	LOC101744016
1514	KWMTBOMO01514	-0.195	0.097	-1.048	3.49e-01	6.90e-01	-6.948	L5D3_OR_VS_L5D3_Ctr	noSig	NA
1515	KWMTBOMO01515	0.213	2.464	0.761	4.86e-01	8.39e-01	-7.215	L5D3_OR_VS_L5D3_Ctr	noSig	NA
1516	KWMTBOMO01516	-0.122	5.488	-0.678	5.32e-01	8.88e-01	-7.28	L5D3_OR_VS_L5D3_Ctr	noSig	Scpx
1517	KWMTBOMO01517	-0.018	0.019	-0.654	5.46e-01	9.03e-01	-7.298	L5D3_OR_VS_L5D3_Ctr	noSig	LOC101740400
1518	KWMTBOMO01518	-0.222	3.798	-1.031	3.56e-01	6.91e-01	-6.965	L5D3_OR_VS_L5D3_Ctr	noSig	LOC101746516
1519	KWMTBOMO01519	0.889	1.9	2.744	4.67e-02	2.33e-01	-4.868	L5D3_OR_VS_L5D3_Ctr	noSig	LOC101740269
1520	KWMTBOMO01520	-0.435	1.604	-0.615	5.69e-01	9.28e-01	-7.326	L5D3_OR_VS_L5D3_Ctr	noSig	NA
1521	KWMTBOMO01521	1.619	3.166	1.801	1.40e-01	4.53e-01	-6.062	L5D3_OR_VS_L5D3_Ctr	noSig	LOC105842814
1522	KWMTBOMO01522	1.758	4.354	2.444	6.53e-02	2.90e-01	-5.242	L5D3_OR_VS_L5D3_Ctr	noSig	LOC101739953
1523	KWMTBOMO01523	-0.063	0.032	-1.047	3.49e-01	6.90e-01	-6.949	L5D3_OR_VS_L5D3_Ctr	noSig	LOC101746379
1524	KWMTBOMO01524	0	0	0	1.00e+00	1.00e+00	-7.548	L5D3_OR_VS_L5D3_Ctr	noSig	LOC101739816
1525	KWMTBOMO01525	-0.247	0.785	-0.859	4.35e-01	7.81e-01	-7.13	L5D3_OR_VS_L5D3_Ctr	noSig	LOC101739676
1526	KWMTBOMO01526	0	0	0	1.00e+00	1.00e+00	-7.548	L5D3_OR_VS_L5D3_Ctr	noSig	LOC101746240
1527	KWMTBOMO01527	0	0	0	1.00e+00	1.00e+00	-7.548	L5D3_OR_VS_L5D3_Ctr	noSig	LOC110384922
1528	KWMTBOMO01528	0	0	0	1.00e+00	1.00e+00	-7.548	L5D3_OR_VS_L5D3_Ctr	noSig	LOC101739533
1529	KWMTBOMO01529	-0.059	0.029	-1.047	3.49e-01	6.90e-01	-6.949	L5D3_OR_VS_L5D3_Ctr	noSig	LOC101739392
1530	KWMTBOMO01530	-0.182	4.606	-0.392	7.13e-01	1.00e+00	-7.455	L5D3_OR_VS_L5D3_Ctr	noSig	NA
1531	KWMTBOMO01531	0.158	4.261	0.309	7.71e-01	1.00e+00	-7.49	L5D3_OR_VS_L5D3_Ctr	noSig	LOC101739068
1532	KWMTBOMO01532	-0.774	3.76	-2.374	7.08e-02	3.05e-01	-5.332	L5D3_OR_VS_L5D3_Ctr	noSig	LOC101746096
1533	KWMTBOMO01533	0.146	2.334	0.363	7.33e-01	1.00e+00	-7.468	L5D3_OR_VS_L5D3_Ctr	noSig	LOC101745952
1534	KWMTBOMO01534	-0.04	3.735	-0.185	8.62e-01	1.00e+00	-7.527	L5D3_OR_VS_L5D3_Ctr	noSig	LOC101738928
1535	KWMTBOMO01535	0	0	0	1.00e+00	1.00e+00	-7.548	L5D3_OR_VS_L5D3_Ctr	noSig	LOC110384920
1536	KWMTBOMO01536	-0.017	0.091	-0.162	8.79e-01	1.00e+00	-7.532	L5D3_OR_VS_L5D3_Ctr	noSig	LOC101738792
1537	KWMTBOMO01537	0.103	0.052	1.047	3.49e-01	6.90e-01	-6.948	L5D3_OR_VS_L5D3_Ctr	noSig	LOC101738434
1538	KWMTBOMO01538	-0.158	0.079	-1.048	3.49e-01	6.90e-01	-6.948	L5D3_OR_VS_L5D3_Ctr	noSig	LOC101738654
1539	KWMTBOMO01539	0.005	0.002	0.991	3.73e-01	7.05e-01	-7.006	L5D3_OR_VS_L5D3_Ctr	noSig	NA
1540	KWMTBOMO01540	-0.063	0.199	-0.84	4.44e-01	7.91e-01	-7.147	L5D3_OR_VS_L5D3_Ctr	noSig	NA
1541	KWMTBOMO01541	0.296	0.375	1.45	2.14e-01	5.85e-01	-6.496	L5D3_OR_VS_L5D3_Ctr	noSig	SPI37
1542	KWMTBOMO01542	1.251	1.132	2.012	1.08e-01	3.87e-01	-5.794	L5D3_OR_VS_L5D3_Ctr	noSig	LOC101738162
1543	KWMTBOMO01543	0.889	0.524	1.832	1.35e-01	4.43e-01	-6.023	L5D3_OR_VS_L5D3_Ctr	noSig	LOC101738036
1544	KWMTBOMO01544	0.024	0.035	0.937	3.97e-01	7.36e-01	-7.058	L5D3_OR_VS_L5D3_Ctr	noSig	NA
1545	KWMTBOMO01545	0.276	1.269	0.369	7.30e-01	1.00e+00	-7.466	L5D3_OR_VS_L5D3_Ctr	noSig	LOC105841375
1546	KWMTBOMO01546	0.114	0.338	0.652	5.47e-01	9.04e-01	-7.299	L5D3_OR_VS_L5D3_Ctr	noSig	NA
1547	KWMTBOMO01547	-0.354	3.257	-1.105	3.26e-01	6.90e-01	-6.888	L5D3_OR_VS_L5D3_Ctr	noSig	LOC101745809
1548	KWMTBOMO01548	-0.145	0.311	-2.603	5.46e-02	2.56e-01	-5.043	L5D3_OR_VS_L5D3_Ctr	noSig	NA
1549	KWMTBOMO01549	-0.357	2.845	-1.961	1.15e-01	4.02e-01	-5.858	L5D3_OR_VS_L5D3_Ctr	noSig	NA
1550	KWMTBOMO01550	-0.581	0.922	-2.462	6.40e-02	2.87e-01	-5.22	L5D3_OR_VS_L5D3_Ctr	noSig	LOC101737675
1551	KWMTBOMO01551	0	0	0	1.00e+00	1.00e+00	-7.548	L5D3_OR_VS_L5D3_Ctr	noSig	LOC101737434
1552	KWMTBOMO01552	0.014	0.007	1.041	3.52e-01	6.90e-01	-6.955	L5D3_OR_VS_L5D3_Ctr	noSig	NA
1553	KWMTBOMO01553	0	0	0	1.00e+00	1.00e+00	-7.548	L5D3_OR_VS_L5D3_Ctr	noSig	NA
1554	KWMTBOMO01554	-0.005	0.012	-0.322	7.62e-01	1.00e+00	-7.485	L5D3_OR_VS_L5D3_Ctr	noSig	NA
1555	KWMTBOMO01555	0	0	0	1.00e+00	1.00e+00	-7.548	L5D3_OR_VS_L5D3_Ctr	noSig	LOC101745659
1556	KWMTBOMO01556	0	0	0	1.00e+00	1.00e+00	-7.548	L5D3_OR_VS_L5D3_Ctr	noSig	LOC105841377
1557	KWMTBOMO01557	0	0	0	1.00e+00	1.00e+00	-7.548	L5D3_OR_VS_L5D3_Ctr	noSig	LOC101745515
1558	KWMTBOMO01558	0	0	0	1.00e+00	1.00e+00	-7.548	L5D3_OR_VS_L5D3_Ctr	noSig	NA
1559	KWMTBOMO01559	0	0	0	1.00e+00	1.00e+00	-7.548	L5D3_OR_VS_L5D3_Ctr	noSig	NA
1560	KWMTBOMO01560	0.028	0.014	1.046	3.50e-01	6.90e-01	-6.95	L5D3_OR_VS_L5D3_Ctr	noSig	LOC101745371
1561	KWMTBOMO01561	-0.235	0.891	-1.739	1.51e-01	4.75e-01	-6.14	L5D3_OR_VS_L5D3_Ctr	noSig	LOC101736415
1562	KWMTBOMO01562	-0.281	0.164	-1.06	3.44e-01	6.90e-01	-6.935	L5D3_OR_VS_L5D3_Ctr	noSig	NA
1563	KWMTBOMO01563	-0.337	1.771	-1.194	2.93e-01	6.90e-01	-6.792	L5D3_OR_VS_L5D3_Ctr	noSig	LOC101745221
1564	KWMTBOMO01564	0.559	1.148	3.14	3.07e-02	1.78e-01	-4.391	L5D3_OR_VS_L5D3_Ctr	noSig	LOC101745072
1565	KWMTBOMO01565	-2.251	4.252	-10.212	3.19e-04	1.81e-02	0.931	L5D3_OR_VS_L5D3_Ctr	down	NA
1566	KWMTBOMO01566	0.108	0.767	0.504	6.38e-01	1.00e+00	-7.396	L5D3_OR_VS_L5D3_Ctr	noSig	LOC105841831
1567	KWMTBOMO01567	-0.571	2.14	-2.014	1.08e-01	3.87e-01	-5.791	L5D3_OR_VS_L5D3_Ctr	noSig	LOC101738850
1568	KWMTBOMO01568	-0.294	0.161	-3.443	2.26e-02	1.47e-01	-4.041	L5D3_OR_VS_L5D3_Ctr	noSig	LOC100862792
1569	KWMTBOMO01569	0	0	0	1.00e+00	1.00e+00	-7.548	L5D3_OR_VS_L5D3_Ctr	noSig	LOC101739406
1570	KWMTBOMO01570	0	0	0	1.00e+00	1.00e+00	-7.548	L5D3_OR_VS_L5D3_Ctr	noSig	LOC101739266
1571	KWMTBOMO01571	0.014	0.007	1.041	3.52e-01	6.90e-01	-6.955	L5D3_OR_VS_L5D3_Ctr	noSig	LOC101738711
1572	KWMTBOMO01572	-0.031	0.121	-0.559	6.03e-01	9.64e-01	-7.363	L5D3_OR_VS_L5D3_Ctr	noSig	LOC101743122
1573	KWMTBOMO01573	-0.602	2.302	-2.616	5.38e-02	2.54e-01	-5.027	L5D3_OR_VS_L5D3_Ctr	noSig	LOC101740477
1574	KWMTBOMO01574	-0.291	3.288	-2.025	1.07e-01	3.84e-01	-5.777	L5D3_OR_VS_L5D3_Ctr	noSig	LOC101740616
1575	KWMTBOMO01575	-0.285	0.365	-2.627	5.31e-02	2.53e-01	-5.013	L5D3_OR_VS_L5D3_Ctr	noSig	LOC101739129
1576	KWMTBOMO01576	-0.271	0.289	-1.06	3.44e-01	6.90e-01	-6.935	L5D3_OR_VS_L5D3_Ctr	noSig	LOC101739824
1577	KWMTBOMO01577	0	0	0	1.00e+00	1.00e+00	-7.548	L5D3_OR_VS_L5D3_Ctr	noSig	LOC101737907
1578	KWMTBOMO01578	-0.093	0.061	-0.901	4.14e-01	7.56e-01	-7.092	L5D3_OR_VS_L5D3_Ctr	noSig	LOC101737769
1579	KWMTBOMO01579	-0.39	4.88	-1.152	3.08e-01	6.90e-01	-6.838	L5D3_OR_VS_L5D3_Ctr	noSig	LOC101737629
1580	KWMTBOMO01580	0	0	0	1.00e+00	1.00e+00	-7.548	L5D3_OR_VS_L5D3_Ctr	noSig	LOC101737486
1581	KWMTBOMO01581	-0.084	0.042	-1.047	3.49e-01	6.90e-01	-6.948	L5D3_OR_VS_L5D3_Ctr	noSig	Jhdk
1582	KWMTBOMO01582	0	0	0	1.00e+00	1.00e+00	-7.548	L5D3_OR_VS_L5D3_Ctr	noSig	LOC101737347
1583	KWMTBOMO01583	0.039	0.115	0.525	6.25e-01	9.87e-01	-7.384	L5D3_OR_VS_L5D3_Ctr	noSig	NA
1584	KWMTBOMO01584	0	0	0	1.00e+00	1.00e+00	-7.548	L5D3_OR_VS_L5D3_Ctr	noSig	NA
1585	KWMTBOMO01585	-0.054	0.127	-0.423	6.92e-01	1.00e+00	-7.44	L5D3_OR_VS_L5D3_Ctr	noSig	NA
1586	KWMTBOMO01586	-1.883	4.034	-5.836	3.20e-03	4.69e-02	-1.756	L5D3_OR_VS_L5D3_Ctr	down	NA
1587	KWMTBOMO01587	-0.021	0.085	-0.337	7.52e-01	1.00e+00	-7.479	L5D3_OR_VS_L5D3_Ctr	noSig	NA
1588	KWMTBOMO01588	-0.299	0.341	-4.83	6.68e-03	7.07e-02	-2.62	L5D3_OR_VS_L5D3_Ctr	noSig	NA
1589	KWMTBOMO01589	-0.303	0.249	-1.774	1.44e-01	4.63e-01	-6.096	L5D3_OR_VS_L5D3_Ctr	noSig	NA
1590	KWMTBOMO01590	-0.028	0.038	-0.968	3.83e-01	7.18e-01	-7.027	L5D3_OR_VS_L5D3_Ctr	noSig	NA
1591	KWMTBOMO01591	-1.48	3.885	-5.648	3.64e-03	5.05e-02	-1.908	L5D3_OR_VS_L5D3_Ctr	noSig	serpin-15
1592	KWMTBOMO01592	-0.965	7.235	-4.209	1.12e-02	9.47e-02	-3.221	L5D3_OR_VS_L5D3_Ctr	noSig	LOC101739125
1593	KWMTBOMO01593	-0.059	0.029	-1.047	3.49e-01	6.90e-01	-6.949	L5D3_OR_VS_L5D3_Ctr	noSig	serpin-20
1594	KWMTBOMO01594	-0.231	0.413	-3.91	1.45e-02	1.12e-01	-3.53	L5D3_OR_VS_L5D3_Ctr	noSig	LOC105842102
1595	KWMTBOMO01595	-0.041	0.021	-1.047	3.49e-01	6.90e-01	-6.949	L5D3_OR_VS_L5D3_Ctr	noSig	LOC101735803
1596	KWMTBOMO01596	0	0	0	1.00e+00	1.00e+00	-7.548	L5D3_OR_VS_L5D3_Ctr	noSig	LOC101738846
1597	KWMTBOMO01597	0	0	0	1.00e+00	1.00e+00	-7.548	L5D3_OR_VS_L5D3_Ctr	noSig	LOC101737199
1598	KWMTBOMO01598	0.023	0.035	0.74	4.97e-01	8.50e-01	-7.232	L5D3_OR_VS_L5D3_Ctr	noSig	NA
1599	KWMTBOMO01599	0.023	0.059	1.445	2.16e-01	5.87e-01	-6.502	L5D3_OR_VS_L5D3_Ctr	noSig	NA
1600	KWMTBOMO01600	-0.005	0.002	-0.991	3.73e-01	7.05e-01	-7.006	L5D3_OR_VS_L5D3_Ctr	noSig	LOC101738302
1601	KWMTBOMO01601	-0.018	0.033	-0.607	5.74e-01	9.33e-01	-7.331	L5D3_OR_VS_L5D3_Ctr	noSig	NA
1602	KWMTBOMO01602	0	0	0	1.00e+00	1.00e+00	-7.548	L5D3_OR_VS_L5D3_Ctr	noSig	NA
1603	KWMTBOMO01603	-0.033	0.016	-1.046	3.50e-01	6.90e-01	-6.95	L5D3_OR_VS_L5D3_Ctr	noSig	Alpm
1604	KWMTBOMO01604	0	0	0	1.00e+00	1.00e+00	-7.548	L5D3_OR_VS_L5D3_Ctr	noSig	Alps
1605	KWMTBOMO01605	0	0	0	1.00e+00	1.00e+00	-7.548	L5D3_OR_VS_L5D3_Ctr	noSig	NA
1606	KWMTBOMO01606	-0.666	6.335	-2.19	8.76e-02	3.48e-01	-5.565	L5D3_OR_VS_L5D3_Ctr	noSig	LOC101742458
1607	KWMTBOMO01607	0.05	0.025	1.047	3.49e-01	6.90e-01	-6.949	L5D3_OR_VS_L5D3_Ctr	noSig	LOC101742796
1608	KWMTBOMO01608	-0.01	0.005	-1.032	3.55e-01	6.90e-01	-6.964	L5D3_OR_VS_L5D3_Ctr	noSig	LOC101742943
1609	KWMTBOMO01609	0	0	0	1.00e+00	1.00e+00	-7.548	L5D3_OR_VS_L5D3_Ctr	noSig	LOC100862797
1610	KWMTBOMO01610	0	0	0	1.00e+00	1.00e+00	-7.548	L5D3_OR_VS_L5D3_Ctr	noSig	LOC101743082
1611	KWMTBOMO01611	0	0	0	1.00e+00	1.00e+00	-7.548	L5D3_OR_VS_L5D3_Ctr	noSig	LOC105842097
1612	KWMTBOMO01612	0	0	0	1.00e+00	1.00e+00	-7.548	L5D3_OR_VS_L5D3_Ctr	noSig	LOC101744760
1613	KWMTBOMO01613	-0.369	2.542	-3.116	3.14e-02	1.81e-01	-4.419	L5D3_OR_VS_L5D3_Ctr	noSig	LOC101743230
1614	KWMTBOMO01614	-0.025	0.179	-0.434	6.85e-01	1.00e+00	-7.435	L5D3_OR_VS_L5D3_Ctr	noSig	LOC101744903
1615	KWMTBOMO01615	0	0	0	1.00e+00	1.00e+00	-7.548	L5D3_OR_VS_L5D3_Ctr	noSig	NA
1616	KWMTBOMO01616	0.179	0.089	1.048	3.49e-01	6.90e-01	-6.948	L5D3_OR_VS_L5D3_Ctr	noSig	NA
1617	KWMTBOMO01617	-0.044	2.298	-0.148	8.89e-01	1.00e+00	-7.534	L5D3_OR_VS_L5D3_Ctr	noSig	LOC101743508
1618	KWMTBOMO01618	-0.598	5.217	-7.458	1.19e-03	2.91e-02	-0.591	L5D3_OR_VS_L5D3_Ctr	down	LOC101743741
1619	KWMTBOMO01619	0	0	0	1.00e+00	1.00e+00	-7.548	L5D3_OR_VS_L5D3_Ctr	noSig	NA
1620	KWMTBOMO01620	0.047	2.494	0.372	7.27e-01	1.00e+00	-7.464	L5D3_OR_VS_L5D3_Ctr	noSig	LOC101744183
1621	KWMTBOMO01621	0.945	8.947	12.39	1.40e-04	1.33e-02	1.862	L5D3_OR_VS_L5D3_Ctr	up	LOC105842089
1622	KWMTBOMO01622	0.474	2.077	0.854	4.37e-01	7.84e-01	-7.135	L5D3_OR_VS_L5D3_Ctr	noSig	LOC101744416
1623	KWMTBOMO01623	-0.576	2.524	-1.969	1.14e-01	4.00e-01	-5.849	L5D3_OR_VS_L5D3_Ctr	noSig	NA
1624	KWMTBOMO01624	-0.177	2.994	-0.966	3.84e-01	7.20e-01	-7.03	L5D3_OR_VS_L5D3_Ctr	noSig	LOC101745046
1625	KWMTBOMO01625	-0.193	3.573	-0.938	3.97e-01	7.36e-01	-7.057	L5D3_OR_VS_L5D3_Ctr	noSig	LOC101744566
1626	KWMTBOMO01626	0	0	0	1.00e+00	1.00e+00	-7.548	L5D3_OR_VS_L5D3_Ctr	noSig	LOC101745344
1627	KWMTBOMO01627	0	0	0	1.00e+00	1.00e+00	-7.548	L5D3_OR_VS_L5D3_Ctr	noSig	LOC101744902
1628	KWMTBOMO01628	0	0	0	1.00e+00	1.00e+00	-7.548	L5D3_OR_VS_L5D3_Ctr	noSig	NA
1629	KWMTBOMO01629	0	0	0	1.00e+00	1.00e+00	-7.548	L5D3_OR_VS_L5D3_Ctr	noSig	NA
1630	KWMTBOMO01630	0	0	0	1.00e+00	1.00e+00	-7.548	L5D3_OR_VS_L5D3_Ctr	noSig	LOC101745623
1631	KWMTBOMO01631	0	0	0	1.00e+00	1.00e+00	-7.548	L5D3_OR_VS_L5D3_Ctr	noSig	LOC101745917
1632	KWMTBOMO01632	0	0	0	1.00e+00	1.00e+00	-7.548	L5D3_OR_VS_L5D3_Ctr	noSig	NA
1633	KWMTBOMO01633	0	0	0	1.00e+00	1.00e+00	-7.548	L5D3_OR_VS_L5D3_Ctr	noSig	LOC101745293
1634	KWMTBOMO01634	0.018	0.023	0.54	6.15e-01	9.77e-01	-7.375	L5D3_OR_VS_L5D3_Ctr	noSig	NA
1635	KWMTBOMO01635	-0.014	0.007	-1.041	3.52e-01	6.90e-01	-6.955	L5D3_OR_VS_L5D3_Ctr	noSig	LOC101746347
1636	KWMTBOMO01636	0.014	0.007	1.782	1.43e-01	4.60e-01	-6.086	L5D3_OR_VS_L5D3_Ctr	noSig	LOC110385716
1637	KWMTBOMO01637	-0.63	5.186	-2.113	9.59e-02	3.69e-01	-5.664	L5D3_OR_VS_L5D3_Ctr	noSig	NA
1638	KWMTBOMO01638	0	0	0	1.00e+00	1.00e+00	-7.548	L5D3_OR_VS_L5D3_Ctr	noSig	LOC101745575
1639	KWMTBOMO01639	0	0	0	1.00e+00	1.00e+00	-7.548	L5D3_OR_VS_L5D3_Ctr	noSig	LOC101745725
1640	KWMTBOMO01640	-0.058	0.131	-0.573	5.95e-01	9.55e-01	-7.354	L5D3_OR_VS_L5D3_Ctr	noSig	LOC110385711
1641	KWMTBOMO01641	0.461	1.208	1.594	1.80e-01	5.28e-01	-6.321	L5D3_OR_VS_L5D3_Ctr	noSig	LOC101746632
1642	KWMTBOMO01642	0	0	0	1.00e+00	1.00e+00	-7.548	L5D3_OR_VS_L5D3_Ctr	noSig	LOC101746012
1643	KWMTBOMO01643	0	0	0	1.00e+00	1.00e+00	-7.548	L5D3_OR_VS_L5D3_Ctr	noSig	LOC101745873
1644	KWMTBOMO01644	-0.054	2.754	-0.141	8.94e-01	1.00e+00	-7.535	L5D3_OR_VS_L5D3_Ctr	noSig	LOC101746152
1645	KWMTBOMO01645	0.311	6.526	2.495	6.16e-02	2.79e-01	-5.179	L5D3_OR_VS_L5D3_Ctr	noSig	LOC692911
1646	KWMTBOMO01646	-0.054	4.854	-0.091	9.32e-01	1.00e+00	-7.543	L5D3_OR_VS_L5D3_Ctr	noSig	LOC101746301
1647	KWMTBOMO01647	0.137	0.069	1.048	3.49e-01	6.90e-01	-6.948	L5D3_OR_VS_L5D3_Ctr	noSig	NA
1648	KWMTBOMO01648	-0.384	1.512	-1.279	2.64e-01	6.70e-01	-6.697	L5D3_OR_VS_L5D3_Ctr	noSig	LOC101746773
1649	KWMTBOMO01649	-0.078	2.322	-0.365	7.32e-01	1.00e+00	-7.467	L5D3_OR_VS_L5D3_Ctr	noSig	LOC110385839
1650	KWMTBOMO01650	-0.174	2.848	-1.819	1.37e-01	4.47e-01	-6.039	L5D3_OR_VS_L5D3_Ctr	noSig	LOC692874
1651	KWMTBOMO01651	-0.078	0.039	-2.083	9.94e-02	3.72e-01	-5.702	L5D3_OR_VS_L5D3_Ctr	noSig	LOC101746914
1652	KWMTBOMO01652	0	0	0	1.00e+00	1.00e+00	-7.548	L5D3_OR_VS_L5D3_Ctr	noSig	NA
1653	KWMTBOMO01653	0.085	0.085	0.997	3.71e-01	7.05e-01	-6.999	L5D3_OR_VS_L5D3_Ctr	noSig	NA
1654	KWMTBOMO01654	0.13	0.065	1.048	3.49e-01	6.90e-01	-6.948	L5D3_OR_VS_L5D3_Ctr	noSig	LOC110385707
1655	KWMTBOMO01655	-0.142	0.194	-0.983	3.76e-01	7.10e-01	-7.013	L5D3_OR_VS_L5D3_Ctr	noSig	LOC101746771
1656	KWMTBOMO01656	0.597	2.889	0.992	3.73e-01	7.05e-01	-7.005	L5D3_OR_VS_L5D3_Ctr	noSig	LOC105842075
1657	KWMTBOMO01657	-1.244	2.641	-3.79	1.62e-02	1.20e-01	-3.658	L5D3_OR_VS_L5D3_Ctr	noSig	LOC101746912
1658	KWMTBOMO01658	-0.568	5.416	-2.048	1.04e-01	3.78e-01	-5.748	L5D3_OR_VS_L5D3_Ctr	noSig	LOC101747044
1659	KWMTBOMO01659	-0.43	2.415	-1.547	1.90e-01	5.44e-01	-6.379	L5D3_OR_VS_L5D3_Ctr	noSig	LOC101747045
1660	KWMTBOMO01660	0.18	2.719	0.438	6.82e-01	1.00e+00	-7.433	L5D3_OR_VS_L5D3_Ctr	noSig	LOC101742717
1661	KWMTBOMO01661	-0.648	2.091	-1.678	1.62e-01	4.96e-01	-6.217	L5D3_OR_VS_L5D3_Ctr	noSig	LOC105842573
1662	KWMTBOMO01662	-0.06	5.142	-0.316	7.66e-01	1.00e+00	-7.487	L5D3_OR_VS_L5D3_Ctr	noSig	LOC733058
1663	KWMTBOMO01663	-0.709	3.501	-4.25	1.08e-02	9.31e-02	-3.18	L5D3_OR_VS_L5D3_Ctr	noSig	LOC101747183
1664	KWMTBOMO01664	-0.255	3.117	-1.201	2.90e-01	6.90e-01	-6.784	L5D3_OR_VS_L5D3_Ctr	noSig	NA
1665	KWMTBOMO01665	-1	2.997	-5.973	2.92e-03	4.53e-02	-1.647	L5D3_OR_VS_L5D3_Ctr	down	LOC101735521
1666	KWMTBOMO01666	0.069	0.034	1.469	2.10e-01	5.78e-01	-6.473	L5D3_OR_VS_L5D3_Ctr	noSig	LOC692907
1667	KWMTBOMO01667	-0.782	1.716	-5.342	4.53e-03	5.64e-02	-2.164	L5D3_OR_VS_L5D3_Ctr	noSig	LOC101735658
1668	KWMTBOMO01668	-0.551	3.962	-1.602	1.78e-01	5.27e-01	-6.312	L5D3_OR_VS_L5D3_Ctr	noSig	LOC101735476
1669	KWMTBOMO01669	-0.422	6.095	-3.212	2.85e-02	1.70e-01	-4.306	L5D3_OR_VS_L5D3_Ctr	noSig	LOC732901
1670	KWMTBOMO01670	-0.243	1.926	-2.071	1.01e-01	3.73e-01	-5.718	L5D3_OR_VS_L5D3_Ctr	noSig	NA
1671	KWMTBOMO01671	-0.205	1.402	-3.092	3.22e-02	1.83e-01	-4.447	L5D3_OR_VS_L5D3_Ctr	noSig	LOC101735802
1672	KWMTBOMO01672	0	0.028	0.014	9.90e-01	1.00e+00	-7.548	L5D3_OR_VS_L5D3_Ctr	noSig	NA
1673	KWMTBOMO01673	-0.029	0.105	-0.545	6.13e-01	9.75e-01	-7.372	L5D3_OR_VS_L5D3_Ctr	noSig	NA
1674	KWMTBOMO01674	0.057	0.079	0.699	5.20e-01	8.75e-01	-7.264	L5D3_OR_VS_L5D3_Ctr	noSig	NA
1675	KWMTBOMO01675	-0.051	4.635	-0.163	8.77e-01	1.00e+00	-7.531	L5D3_OR_VS_L5D3_Ctr	noSig	LOC733127
1676	KWMTBOMO01676	-0.067	2.603	-0.281	7.91e-01	1.00e+00	-7.5	L5D3_OR_VS_L5D3_Ctr	noSig	NA
1677	KWMTBOMO01677	-0.092	2.698	-0.337	7.52e-01	1.00e+00	-7.479	L5D3_OR_VS_L5D3_Ctr	noSig	LOC101735930
1678	KWMTBOMO01678	-0.037	1.742	-0.242	8.19e-01	1.00e+00	-7.512	L5D3_OR_VS_L5D3_Ctr	noSig	NA
1679	KWMTBOMO01679	0.349	2.51	2.204	8.62e-02	3.44e-01	-5.548	L5D3_OR_VS_L5D3_Ctr	noSig	NA
1680	KWMTBOMO01680	0.019	0.024	0.788	4.71e-01	8.22e-01	-7.192	L5D3_OR_VS_L5D3_Ctr	noSig	NA
1681	KWMTBOMO01681	0	0	0	1.00e+00	1.00e+00	-7.548	L5D3_OR_VS_L5D3_Ctr	noSig	LOC101736056
1682	KWMTBOMO01682	-0.009	0.009	-0.655	5.45e-01	9.03e-01	-7.297	L5D3_OR_VS_L5D3_Ctr	noSig	LOC101735700
1683	KWMTBOMO01683	-0.188	4.488	-1.347	2.43e-01	6.35e-01	-6.619	L5D3_OR_VS_L5D3_Ctr	noSig	LOC693040
1684	KWMTBOMO01684	-1.152	3.679	-4.74	7.18e-03	7.34e-02	-2.704	L5D3_OR_VS_L5D3_Ctr	noSig	LOC101735838
1685	KWMTBOMO01685	-1.535	3.03	-4.617	7.92e-03	7.82e-02	-2.82	L5D3_OR_VS_L5D3_Ctr	noSig	LOC101735970
1686	KWMTBOMO01686	0	0	0	1.00e+00	1.00e+00	-7.548	L5D3_OR_VS_L5D3_Ctr	noSig	NA
1687	KWMTBOMO01687	-0.597	1.216	-2.015	1.08e-01	3.87e-01	-5.79	L5D3_OR_VS_L5D3_Ctr	noSig	NA
1688	KWMTBOMO01688	0.513	8.037	7.656	1.07e-03	2.78e-02	-0.465	L5D3_OR_VS_L5D3_Ctr	up	LOC101736101
1689	KWMTBOMO01689	-0.184	0.179	-2.191	8.76e-02	3.48e-01	-5.565	L5D3_OR_VS_L5D3_Ctr	noSig	NA
1690	KWMTBOMO01690	0.471	0.8	2.536	5.88e-02	2.70e-01	-5.127	L5D3_OR_VS_L5D3_Ctr	noSig	LOC692869
1691	KWMTBOMO01691	0	0	0	1.00e+00	1.00e+00	-7.548	L5D3_OR_VS_L5D3_Ctr	noSig	CTL6
1692	KWMTBOMO01692	0	0	0	1.00e+00	1.00e+00	-7.548	L5D3_OR_VS_L5D3_Ctr	noSig	LOC101736237
1693	KWMTBOMO01693	0	0	0	1.00e+00	1.00e+00	-7.548	L5D3_OR_VS_L5D3_Ctr	noSig	LOC100862767
1694	KWMTBOMO01694	-0.017	0.091	-0.162	8.79e-01	1.00e+00	-7.532	L5D3_OR_VS_L5D3_Ctr	noSig	LOC101736367
1695	KWMTBOMO01695	-0.069	0.167	-0.631	5.60e-01	9.18e-01	-7.315	L5D3_OR_VS_L5D3_Ctr	noSig	LOC101736451
1696	KWMTBOMO01696	-0.222	2.064	-0.781	4.75e-01	8.27e-01	-7.198	L5D3_OR_VS_L5D3_Ctr	noSig	LOC101736578
1697	KWMTBOMO01697	0.023	0.012	1.045	3.50e-01	6.90e-01	-6.951	L5D3_OR_VS_L5D3_Ctr	noSig	LOC101736579
1698	KWMTBOMO01698	0.236	1.115	0.467	6.63e-01	1.00e+00	-7.417	L5D3_OR_VS_L5D3_Ctr	noSig	LOC110386676
1699	KWMTBOMO01699	0.307	1.492	2.095	9.80e-02	3.72e-01	-5.687	L5D3_OR_VS_L5D3_Ctr	noSig	LOC101736723
1700	KWMTBOMO01700	-0.384	2.77	-2.43	6.63e-02	2.92e-01	-5.26	L5D3_OR_VS_L5D3_Ctr	noSig	LOC101736813
1701	KWMTBOMO01701	0.005	0.012	0.286	7.88e-01	1.00e+00	-7.498	L5D3_OR_VS_L5D3_Ctr	noSig	LOC101736853
1702	KWMTBOMO01702	0	0	0	1.00e+00	1.00e+00	-7.548	L5D3_OR_VS_L5D3_Ctr	noSig	LOC110385641
1703	KWMTBOMO01703	-0.009	0.014	-0.498	6.42e-01	1.00e+00	-7.4	L5D3_OR_VS_L5D3_Ctr	noSig	NA
1704	KWMTBOMO01704	0	0	0	1.00e+00	1.00e+00	-7.548	L5D3_OR_VS_L5D3_Ctr	noSig	NA
1705	KWMTBOMO01705	-0.786	2.613	-3.252	2.73e-02	1.66e-01	-4.26	L5D3_OR_VS_L5D3_Ctr	noSig	LOC101736940
1706	KWMTBOMO01706	-1.089	1.058	-1.877	1.27e-01	4.29e-01	-5.965	L5D3_OR_VS_L5D3_Ctr	noSig	NA
1707	KWMTBOMO01707	-0.346	2.129	-1.539	1.92e-01	5.48e-01	-6.388	L5D3_OR_VS_L5D3_Ctr	noSig	LOC101737117
1708	KWMTBOMO01708	-0.574	3.984	-1.541	1.92e-01	5.47e-01	-6.387	L5D3_OR_VS_L5D3_Ctr	noSig	LOC101737161
1709	KWMTBOMO01709	-0.603	2.542	-6.578	1.98e-03	3.68e-02	-1.192	L5D3_OR_VS_L5D3_Ctr	down	LOC101737308
1710	KWMTBOMO01710	-0.071	0.036	-1.047	3.49e-01	6.90e-01	-6.948	L5D3_OR_VS_L5D3_Ctr	noSig	LOC101737450
1711	KWMTBOMO01711	0	0	0	1.00e+00	1.00e+00	-7.548	L5D3_OR_VS_L5D3_Ctr	noSig	LOC101737591
1712	KWMTBOMO01712	-1.152	2.811	-3.33	2.53e-02	1.57e-01	-4.17	L5D3_OR_VS_L5D3_Ctr	noSig	NA
1713	KWMTBOMO01713	-0.041	0.021	-1.047	3.49e-01	6.90e-01	-6.949	L5D3_OR_VS_L5D3_Ctr	noSig	NA
1714	KWMTBOMO01714	-0.425	2.686	-3.433	2.28e-02	1.47e-01	-4.053	L5D3_OR_VS_L5D3_Ctr	noSig	LOC101737261
1715	KWMTBOMO01715	-0.037	0.023	-1.101	3.28e-01	6.90e-01	-6.893	L5D3_OR_VS_L5D3_Ctr	noSig	NA
1716	KWMTBOMO01716	0	0	0	1.00e+00	1.00e+00	-7.548	L5D3_OR_VS_L5D3_Ctr	noSig	NA
1717	KWMTBOMO01717	-0.147	0.073	-2.092	9.84e-02	3.72e-01	-5.691	L5D3_OR_VS_L5D3_Ctr	noSig	NA
1718	KWMTBOMO01718	-0.394	1.53	-2.618	5.37e-02	2.54e-01	-5.025	L5D3_OR_VS_L5D3_Ctr	noSig	LOC101737733
1719	KWMTBOMO01719	-0.643	2.159	-3.452	2.24e-02	1.46e-01	-4.031	L5D3_OR_VS_L5D3_Ctr	noSig	LOC101738131
1720	KWMTBOMO01720	-1.26	6.719	-6.91	1.62e-03	3.38e-02	-0.957	L5D3_OR_VS_L5D3_Ctr	down	LOC101738262
1721	KWMTBOMO01721	-0.793	1.492	-10.247	3.14e-04	1.81e-02	0.948	L5D3_OR_VS_L5D3_Ctr	down	LOC101738489
1722	KWMTBOMO01722	0	0	0	1.00e+00	1.00e+00	-7.548	L5D3_OR_VS_L5D3_Ctr	noSig	LOC101738619
1723	KWMTBOMO01723	0.583	2.622	0.887	4.21e-01	7.64e-01	-7.105	L5D3_OR_VS_L5D3_Ctr	noSig	LOC101737404
1724	KWMTBOMO01724	0.175	0.088	2.038	1.05e-01	3.81e-01	-5.76	L5D3_OR_VS_L5D3_Ctr	noSig	NA
1725	KWMTBOMO01725	-0.019	0.009	-1.044	3.51e-01	6.90e-01	-6.952	L5D3_OR_VS_L5D3_Ctr	noSig	NA
1726	KWMTBOMO01726	-0.085	0.071	-1.494	2.03e-01	5.68e-01	-6.443	L5D3_OR_VS_L5D3_Ctr	noSig	NA
1727	KWMTBOMO01727	0.01	0.088	0.236	8.24e-01	1.00e+00	-7.514	L5D3_OR_VS_L5D3_Ctr	noSig	NA
1728	KWMTBOMO01728	-0.422	0.386	-1.674	1.63e-01	4.98e-01	-6.222	L5D3_OR_VS_L5D3_Ctr	noSig	NA
1729	KWMTBOMO01729	-0.096	0.09	-1.358	2.40e-01	6.30e-01	-6.606	L5D3_OR_VS_L5D3_Ctr	noSig	NA
1730	KWMTBOMO01730	0.028	0.014	1.046	3.50e-01	6.90e-01	-6.95	L5D3_OR_VS_L5D3_Ctr	noSig	ICE
1731	KWMTBOMO01731	-0.015	0.072	-0.177	8.67e-01	1.00e+00	-7.529	L5D3_OR_VS_L5D3_Ctr	noSig	NA
1732	KWMTBOMO01732	0.005	0.049	0.134	8.99e-01	1.00e+00	-7.537	L5D3_OR_VS_L5D3_Ctr	noSig	NA
1733	KWMTBOMO01733	0.005	0.002	0.991	3.73e-01	7.05e-01	-7.006	L5D3_OR_VS_L5D3_Ctr	noSig	NA
1734	KWMTBOMO01734	-0.227	0.137	-2.835	4.23e-02	2.18e-01	-4.756	L5D3_OR_VS_L5D3_Ctr	noSig	LOC101741818
1735	KWMTBOMO01735	-0.172	0.222	-2.318	7.54e-02	3.17e-01	-5.402	L5D3_OR_VS_L5D3_Ctr	noSig	LOC105841580
1736	KWMTBOMO01736	-0.063	0.136	-1.255	2.72e-01	6.82e-01	-6.724	L5D3_OR_VS_L5D3_Ctr	noSig	NA
1737	KWMTBOMO01737	0	0	0	1.00e+00	1.00e+00	-7.548	L5D3_OR_VS_L5D3_Ctr	noSig	LOC101737547
1738	KWMTBOMO01738	1.516	3.597	2.326	7.47e-02	3.15e-01	-5.392	L5D3_OR_VS_L5D3_Ctr	noSig	LOC101738751
1739	KWMTBOMO01739	-0.173	0.087	-1.763	1.46e-01	4.66e-01	-6.11	L5D3_OR_VS_L5D3_Ctr	noSig	LOC105842836
1740	KWMTBOMO01740	0	0	0	1.00e+00	1.00e+00	-7.548	L5D3_OR_VS_L5D3_Ctr	noSig	NA
1741	KWMTBOMO01741	0	0	0	1.00e+00	1.00e+00	-7.548	L5D3_OR_VS_L5D3_Ctr	noSig	LOC101738894
1742	KWMTBOMO01742	-0.261	2.48	-1.8	1.40e-01	4.54e-01	-6.064	L5D3_OR_VS_L5D3_Ctr	noSig	LOC101739036
1743	KWMTBOMO01743	-1.124	2.618	-2.549	5.80e-02	2.68e-01	-5.11	L5D3_OR_VS_L5D3_Ctr	noSig	LOC101739183
1744	KWMTBOMO01744	-0.151	0.076	-1.048	3.49e-01	6.90e-01	-6.948	L5D3_OR_VS_L5D3_Ctr	noSig	NA
1745	KWMTBOMO01745	-0.035	0.041	-0.584	5.88e-01	9.48e-01	-7.346	L5D3_OR_VS_L5D3_Ctr	noSig	LOC110385712
1746	KWMTBOMO01746	-0.13	3.329	-1.156	3.07e-01	6.90e-01	-6.834	L5D3_OR_VS_L5D3_Ctr	noSig	NA
1747	KWMTBOMO01747	0	0	0	1.00e+00	1.00e+00	-7.548	L5D3_OR_VS_L5D3_Ctr	noSig	LOC101737691
1748	KWMTBOMO01748	0.034	2.513	0.196	8.53e-01	1.00e+00	-7.524	L5D3_OR_VS_L5D3_Ctr	noSig	LOC101739506
1749	KWMTBOMO01749	0	0	0	1.00e+00	1.00e+00	-7.548	L5D3_OR_VS_L5D3_Ctr	noSig	LOC110385721
1750	KWMTBOMO01750	0	0	0	1.00e+00	1.00e+00	-7.548	L5D3_OR_VS_L5D3_Ctr	noSig	NA
1751	KWMTBOMO01751	0.73	3.651	3.391	2.38e-02	1.51e-01	-4.1	L5D3_OR_VS_L5D3_Ctr	noSig	LOC101739790
1752	KWMTBOMO01752	-0.194	6.805	-1.147	3.10e-01	6.90e-01	-6.843	L5D3_OR_VS_L5D3_Ctr	noSig	LOC101739522
1753	KWMTBOMO01753	-0.702	2.685	-3.861	1.52e-02	1.15e-01	-3.582	L5D3_OR_VS_L5D3_Ctr	noSig	LOC101739928
1754	KWMTBOMO01754	-0.737	2.979	-2.823	4.29e-02	2.20e-01	-4.772	L5D3_OR_VS_L5D3_Ctr	noSig	LOC101740551
1755	KWMTBOMO01755	0.431	1.688	1.466	2.10e-01	5.79e-01	-6.477	L5D3_OR_VS_L5D3_Ctr	noSig	LOC101740688
1756	KWMTBOMO01756	-0.159	0.939	-1.398	2.29e-01	6.12e-01	-6.559	L5D3_OR_VS_L5D3_Ctr	noSig	LOC101740931
1757	KWMTBOMO01757	0.088	9.1	2.858	4.13e-02	2.15e-01	-4.729	L5D3_OR_VS_L5D3_Ctr	noSig	eIF3h
1758	KWMTBOMO01758	0	0	0	1.00e+00	1.00e+00	-7.548	L5D3_OR_VS_L5D3_Ctr	noSig	LOC101741073
1759	KWMTBOMO01759	-0.023	0.012	-1.045	3.50e-01	6.90e-01	-6.951	L5D3_OR_VS_L5D3_Ctr	noSig	NA
1760	KWMTBOMO01760	0	0	0	1.00e+00	1.00e+00	-7.548	L5D3_OR_VS_L5D3_Ctr	noSig	NA
1761	KWMTBOMO01761	0.023	0.035	0.872	4.28e-01	7.73e-01	-7.118	L5D3_OR_VS_L5D3_Ctr	noSig	NA
1762	KWMTBOMO01762	0	0	0	1.00e+00	1.00e+00	-7.548	L5D3_OR_VS_L5D3_Ctr	noSig	LOC101737825
1763	KWMTBOMO01763	-0.157	0.165	-1.355	2.41e-01	6.31e-01	-6.609	L5D3_OR_VS_L5D3_Ctr	noSig	LOC101736598
1764	KWMTBOMO01764	-0.294	1.619	-1.343	2.44e-01	6.36e-01	-6.623	L5D3_OR_VS_L5D3_Ctr	noSig	LOC101737957
1765	KWMTBOMO01765	0	0	0	1.00e+00	1.00e+00	-7.548	L5D3_OR_VS_L5D3_Ctr	noSig	LOC101738090
1766	KWMTBOMO01766	-0.119	3.9	-0.258	8.08e-01	1.00e+00	-7.507	L5D3_OR_VS_L5D3_Ctr	noSig	LOC101738219
1767	KWMTBOMO01767	0.005	0.002	0.991	3.73e-01	7.05e-01	-7.006	L5D3_OR_VS_L5D3_Ctr	noSig	LOC101738350
1768	KWMTBOMO01768	-0.042	0.035	-1.351	2.42e-01	6.33e-01	-6.614	L5D3_OR_VS_L5D3_Ctr	noSig	NA
1769	KWMTBOMO01769	-0.055	0.047	-2.151	9.18e-02	3.58e-01	-5.615	L5D3_OR_VS_L5D3_Ctr	noSig	LOC110385051
1770	KWMTBOMO01770	0	0	0	1.00e+00	1.00e+00	-7.548	L5D3_OR_VS_L5D3_Ctr	noSig	LOC101738490
1771	KWMTBOMO01771	0.049	0.039	0.791	4.69e-01	8.20e-01	-7.19	L5D3_OR_VS_L5D3_Ctr	noSig	WNT-1
1772	KWMTBOMO01772	0	0	0	1.00e+00	1.00e+00	-7.548	L5D3_OR_VS_L5D3_Ctr	noSig	LOC101741216
1773	KWMTBOMO01773	0	0	0	1.00e+00	1.00e+00	-7.548	L5D3_OR_VS_L5D3_Ctr	noSig	LOC101741036
1774	KWMTBOMO01774	-0.005	0.007	-0.46	6.67e-01	1.00e+00	-7.421	L5D3_OR_VS_L5D3_Ctr	noSig	LOC101740895
1775	KWMTBOMO01775	-0.396	0.676	-2.41	6.79e-02	2.97e-01	-5.286	L5D3_OR_VS_L5D3_Ctr	noSig	LOC101738752
1776	KWMTBOMO01776	0	0	0	1.00e+00	1.00e+00	-7.548	L5D3_OR_VS_L5D3_Ctr	noSig	LOC101738896
1777	KWMTBOMO01777	0	0	0	1.00e+00	1.00e+00	-7.548	L5D3_OR_VS_L5D3_Ctr	noSig	LOC101737976
1778	KWMTBOMO01778	0.005	0.026	0.227	8.30e-01	1.00e+00	-7.516	L5D3_OR_VS_L5D3_Ctr	noSig	LOC100313953
1779	KWMTBOMO01779	0.019	0.009	1.044	3.51e-01	6.90e-01	-6.952	L5D3_OR_VS_L5D3_Ctr	noSig	LOC101741357
1780	KWMTBOMO01780	0	0	0	1.00e+00	1.00e+00	-7.548	L5D3_OR_VS_L5D3_Ctr	noSig	LOC101744875
1781	KWMTBOMO01781	-0.054	0.046	-0.91	4.10e-01	7.51e-01	-7.084	L5D3_OR_VS_L5D3_Ctr	noSig	NA
1782	KWMTBOMO01782	-0.155	0.283	-0.896	4.17e-01	7.59e-01	-7.097	L5D3_OR_VS_L5D3_Ctr	noSig	NA
1783	KWMTBOMO01783	-0.539	0.445	-2.314	7.58e-02	3.18e-01	-5.408	L5D3_OR_VS_L5D3_Ctr	noSig	NA
1784	KWMTBOMO01784	-0.657	3.208	-4.107	1.22e-02	9.98e-02	-3.325	L5D3_OR_VS_L5D3_Ctr	noSig	LOC101739184
1785	KWMTBOMO01785	0.042	2.74	0.168	8.74e-01	1.00e+00	-7.531	L5D3_OR_VS_L5D3_Ctr	noSig	LOC101739321
1786	KWMTBOMO01786	-0.021	0.109	-0.298	7.80e-01	1.00e+00	-7.494	L5D3_OR_VS_L5D3_Ctr	noSig	LOC101741442
1787	KWMTBOMO01787	0.011	0.109	0.078	9.41e-01	1.00e+00	-7.544	L5D3_OR_VS_L5D3_Ctr	noSig	LOC101741583
1788	KWMTBOMO01788	-1.68	3.867	-7.587	1.11e-03	2.82e-02	-0.508	L5D3_OR_VS_L5D3_Ctr	down	LOC101741727
1789	KWMTBOMO01789	-0.165	7.697	-1.998	1.10e-01	3.91e-01	-5.811	L5D3_OR_VS_L5D3_Ctr	noSig	LOC692905
1790	KWMTBOMO01790	-0.557	4.844	-1.498	2.02e-01	5.66e-01	-6.438	L5D3_OR_VS_L5D3_Ctr	noSig	LOC101741876
1791	KWMTBOMO01791	0.216	2.911	0.917	4.07e-01	7.48e-01	-7.077	L5D3_OR_VS_L5D3_Ctr	noSig	LOC110385726
1792	KWMTBOMO01792	0.084	0.113	0.832	4.48e-01	7.97e-01	-7.155	L5D3_OR_VS_L5D3_Ctr	noSig	LOC105842950
1793	KWMTBOMO01793	0	0	0	1.00e+00	1.00e+00	-7.548	L5D3_OR_VS_L5D3_Ctr	noSig	NA
1794	KWMTBOMO01794	-0.575	5.089	-4.989	5.90e-03	6.56e-02	-2.475	L5D3_OR_VS_L5D3_Ctr	noSig	LOC101742221
1795	KWMTBOMO01795	0	0	0	1.00e+00	1.00e+00	-7.548	L5D3_OR_VS_L5D3_Ctr	noSig	LOC101742355
1796	KWMTBOMO01796	0.247	6.658	0.904	4.13e-01	7.55e-01	-7.089	L5D3_OR_VS_L5D3_Ctr	noSig	LOC692987
1797	KWMTBOMO01797	-1.205	2.274	-5.257	4.82e-03	5.85e-02	-2.238	L5D3_OR_VS_L5D3_Ctr	noSig	LOC101742507
1798	KWMTBOMO01798	-0.023	0.068	-1.3	2.58e-01	6.59e-01	-6.673	L5D3_OR_VS_L5D3_Ctr	noSig	LOC101739883
1799	KWMTBOMO01799	-0.762	6.343	-4.795	6.87e-03	7.18e-02	-2.653	L5D3_OR_VS_L5D3_Ctr	noSig	LOC733131
1800	KWMTBOMO01800	-0.632	3.568	-2.304	7.67e-02	3.20e-01	-5.421	L5D3_OR_VS_L5D3_Ctr	noSig	LOC733043
1801	KWMTBOMO01801	-0.173	0.196	-3.076	3.28e-02	1.85e-01	-4.467	L5D3_OR_VS_L5D3_Ctr	noSig	LOC101742844
1802	KWMTBOMO01802	0.051	6.614	0.279	7.93e-01	1.00e+00	-7.501	L5D3_OR_VS_L5D3_Ctr	noSig	LOC693077
1803	KWMTBOMO01803	-0.187	1.982	-0.649	5.49e-01	9.05e-01	-7.301	L5D3_OR_VS_L5D3_Ctr	noSig	LOC101742986
1804	KWMTBOMO01804	-1.362	3.01	-7.716	1.03e-03	2.75e-02	-0.427	L5D3_OR_VS_L5D3_Ctr	down	LOC101743271
1805	KWMTBOMO01805	-1.145	2.604	-5.431	4.25e-03	5.44e-02	-2.089	L5D3_OR_VS_L5D3_Ctr	noSig	LOC101743127
1806	KWMTBOMO01806	-0.664	5.552	-3.41	2.34e-02	1.50e-01	-4.079	L5D3_OR_VS_L5D3_Ctr	noSig	LOC101743411
1807	KWMTBOMO01807	0	0	0	1.00e+00	1.00e+00	-7.548	L5D3_OR_VS_L5D3_Ctr	noSig	CPR57
1808	KWMTBOMO01808	0.255	0.79	2.144	9.25e-02	3.60e-01	-5.624	L5D3_OR_VS_L5D3_Ctr	noSig	LOC101743645
1809	KWMTBOMO01809	0.127	0.118	1.145	3.11e-01	6.90e-01	-6.846	L5D3_OR_VS_L5D3_Ctr	noSig	NA
1810	KWMTBOMO01810	0	0	0	1.00e+00	1.00e+00	-7.548	L5D3_OR_VS_L5D3_Ctr	noSig	NA
1811	KWMTBOMO01811	-0.196	1.946	-0.71	5.14e-01	8.68e-01	-7.256	L5D3_OR_VS_L5D3_Ctr	noSig	LOC101740151
1812	KWMTBOMO01812	0	0	0	1.00e+00	1.00e+00	-7.548	L5D3_OR_VS_L5D3_Ctr	noSig	LOC101743892
1813	KWMTBOMO01813	-0.01	0.005	-1.032	3.55e-01	6.90e-01	-6.964	L5D3_OR_VS_L5D3_Ctr	noSig	LOC101744036
1814	KWMTBOMO01814	0	0	0	1.00e+00	1.00e+00	-7.548	L5D3_OR_VS_L5D3_Ctr	noSig	LOC692784
1815	KWMTBOMO01815	-1.075	2.96	-7.678	1.05e-03	2.77e-02	-0.451	L5D3_OR_VS_L5D3_Ctr	down	LOC101735630
1816	KWMTBOMO01816	-0.496	4.053	-1.487	2.05e-01	5.71e-01	-6.452	L5D3_OR_VS_L5D3_Ctr	noSig	LOC105842295
1817	KWMTBOMO01817	-0.325	3.018	-0.952	3.90e-01	7.27e-01	-7.043	L5D3_OR_VS_L5D3_Ctr	noSig	LOC101736027
1818	KWMTBOMO01818	-0.065	2.341	-0.19	8.58e-01	1.00e+00	-7.526	L5D3_OR_VS_L5D3_Ctr	noSig	LOC101740295
1819	KWMTBOMO01819	-0.602	0.784	-8.292	7.65e-04	2.41e-02	-0.079	L5D3_OR_VS_L5D3_Ctr	down	LOC101740689
1820	KWMTBOMO01820	0.097	1.822	0.291	7.84e-01	1.00e+00	-7.496	L5D3_OR_VS_L5D3_Ctr	noSig	LOC101740165
1821	KWMTBOMO01821	-0.603	5.022	-1.957	1.16e-01	4.03e-01	-5.864	L5D3_OR_VS_L5D3_Ctr	noSig	LOC101744329
1822	KWMTBOMO01822	-0.594	1.168	-1.721	1.54e-01	4.82e-01	-6.163	L5D3_OR_VS_L5D3_Ctr	noSig	LOC101740975
1823	KWMTBOMO01823	-0.313	0.281	-5.226	4.94e-03	5.92e-02	-2.265	L5D3_OR_VS_L5D3_Ctr	noSig	LOC105841392
1824	KWMTBOMO01824	-0.917	2.2	-3.631	1.89e-02	1.31e-01	-3.831	L5D3_OR_VS_L5D3_Ctr	noSig	LOC101744473
1825	KWMTBOMO01825	0	0	0	1.00e+00	1.00e+00	-7.548	L5D3_OR_VS_L5D3_Ctr	noSig	irp2
1826	KWMTBOMO01826	-0.849	4.945	-5.518	3.99e-03	5.28e-02	-2.016	L5D3_OR_VS_L5D3_Ctr	noSig	LOC732942
1827	KWMTBOMO01827	-1.263	2.26	-8.424	7.16e-04	2.37e-02	-0.002	L5D3_OR_VS_L5D3_Ctr	down	LOC101744619
1828	KWMTBOMO01828	0	0	0	1.00e+00	1.00e+00	-7.548	L5D3_OR_VS_L5D3_Ctr	noSig	LOC101744759
1829	KWMTBOMO01829	0.183	1.004	0.812	4.59e-01	8.08e-01	-7.172	L5D3_OR_VS_L5D3_Ctr	noSig	CTL5
1830	KWMTBOMO01830	-0.546	2.648	-1.545	1.91e-01	5.45e-01	-6.382	L5D3_OR_VS_L5D3_Ctr	noSig	LOC101744997
1831	KWMTBOMO01831	-0.472	3.383	-4.921	6.22e-03	6.79e-02	-2.536	L5D3_OR_VS_L5D3_Ctr	noSig	LOC101745143
1832	KWMTBOMO01832	-0.935	3.801	-8.941	5.58e-04	2.16e-02	0.287	L5D3_OR_VS_L5D3_Ctr	down	LOC101745294
1833	KWMTBOMO01833	-0.275	0.54	-2.158	9.10e-02	3.57e-01	-5.607	L5D3_OR_VS_L5D3_Ctr	noSig	NA
1834	KWMTBOMO01834	-0.067	0.034	-1.047	3.49e-01	6.90e-01	-6.948	L5D3_OR_VS_L5D3_Ctr	noSig	LOC101745576
1835	KWMTBOMO01835	0	0	0	1.00e+00	1.00e+00	-7.548	L5D3_OR_VS_L5D3_Ctr	noSig	LOC101745434
1836	KWMTBOMO01836	0.058	0.445	0.843	4.43e-01	7.90e-01	-7.144	L5D3_OR_VS_L5D3_Ctr	noSig	LOC101741258
1837	KWMTBOMO01837	-0.038	0.325	-0.281	7.92e-01	1.00e+00	-7.5	L5D3_OR_VS_L5D3_Ctr	noSig	NA
1838	KWMTBOMO01838	0	0	0	1.00e+00	1.00e+00	-7.548	L5D3_OR_VS_L5D3_Ctr	noSig	LOC101741538
1839	KWMTBOMO01839	0	0	0	1.00e+00	1.00e+00	-7.548	L5D3_OR_VS_L5D3_Ctr	noSig	LOC101741820
1840	KWMTBOMO01840	-0.409	2.965	-3.645	1.86e-02	1.30e-01	-3.816	L5D3_OR_VS_L5D3_Ctr	noSig	LOC101741971
1841	KWMTBOMO01841	-0.796	3.278	-6.272	2.40e-03	4.12e-02	-1.418	L5D3_OR_VS_L5D3_Ctr	down	LOC101745726
1842	KWMTBOMO01842	-1.868	3.555	-6.508	2.07e-03	3.76e-02	-1.243	L5D3_OR_VS_L5D3_Ctr	down	Acci
1843	KWMTBOMO01843	-0.036	0.028	-0.812	4.58e-01	8.08e-01	-7.172	L5D3_OR_VS_L5D3_Ctr	noSig	NA
1844	KWMTBOMO01844	-0.164	5.742	-1.444	2.16e-01	5.88e-01	-6.504	L5D3_OR_VS_L5D3_Ctr	noSig	LOC101745874
1845	KWMTBOMO01845	-0.067	0.048	-1.118	3.21e-01	6.90e-01	-6.875	L5D3_OR_VS_L5D3_Ctr	noSig	LOC101746112
1846	KWMTBOMO01846	0	0	0	1.00e+00	1.00e+00	-7.548	L5D3_OR_VS_L5D3_Ctr	noSig	NA
1847	KWMTBOMO01847	0	0	0	1.00e+00	1.00e+00	-7.548	L5D3_OR_VS_L5D3_Ctr	noSig	NA
1848	KWMTBOMO01848	0.019	0.009	1.044	3.51e-01	6.90e-01	-6.952	L5D3_OR_VS_L5D3_Ctr	noSig	LOC101742112
1849	KWMTBOMO01849	0	0	0	1.00e+00	1.00e+00	-7.548	L5D3_OR_VS_L5D3_Ctr	noSig	LOC101742267
1850	KWMTBOMO01850	0	0	0	1.00e+00	1.00e+00	-7.548	L5D3_OR_VS_L5D3_Ctr	noSig	LOC101742696
1851	KWMTBOMO01851	-0.146	2.172	-0.872	4.28e-01	7.73e-01	-7.118	L5D3_OR_VS_L5D3_Ctr	noSig	LOC101742845
1852	KWMTBOMO01852	-0.995	3.704	-9	5.43e-04	2.13e-02	0.319	L5D3_OR_VS_L5D3_Ctr	down	LOC101746394
1853	KWMTBOMO01853	-0.322	0.291	-2.999	3.55e-02	1.94e-01	-4.559	L5D3_OR_VS_L5D3_Ctr	noSig	NA
1854	KWMTBOMO01854	-0.161	0.181	-2.326	7.48e-02	3.15e-01	-5.392	L5D3_OR_VS_L5D3_Ctr	noSig	NA
1855	KWMTBOMO01855	-0.335	4.292	-1.559	1.88e-01	5.39e-01	-6.364	L5D3_OR_VS_L5D3_Ctr	noSig	USP
1856	KWMTBOMO01856	0.021	4.32	0.055	9.59e-01	1.00e+00	-7.546	L5D3_OR_VS_L5D3_Ctr	noSig	LOC101746531
1857	KWMTBOMO01857	-0.013	0.303	-0.207	8.46e-01	1.00e+00	-7.522	L5D3_OR_VS_L5D3_Ctr	noSig	Fatp
1858	KWMTBOMO01858	-0.161	0.137	-5.232	4.91e-03	5.90e-02	-2.259	L5D3_OR_VS_L5D3_Ctr	noSig	LOC105841502
1859	KWMTBOMO01859	-0.063	2.548	-0.334	7.54e-01	1.00e+00	-7.48	L5D3_OR_VS_L5D3_Ctr	noSig	LOC101746772
1860	KWMTBOMO01860	-0.085	0.117	-2.955	3.72e-02	2.01e-01	-4.611	L5D3_OR_VS_L5D3_Ctr	noSig	LOC101746913
1861	KWMTBOMO01861	-0.808	3.069	-9.995	3.49e-04	1.90e-02	0.827	L5D3_OR_VS_L5D3_Ctr	down	LOC101747130
1862	KWMTBOMO01862	-0.523	3.199	-1.482	2.06e-01	5.73e-01	-6.458	L5D3_OR_VS_L5D3_Ctr	noSig	LOC101735337
1863	KWMTBOMO01863	-0.412	0.435	-3.074	3.28e-02	1.85e-01	-4.469	L5D3_OR_VS_L5D3_Ctr	noSig	NA
1864	KWMTBOMO01864	0.028	0.014	1.811	1.38e-01	4.50e-01	-6.049	L5D3_OR_VS_L5D3_Ctr	noSig	LOC101736924
1865	KWMTBOMO01865	0.046	0.046	1.041	3.52e-01	6.90e-01	-6.955	L5D3_OR_VS_L5D3_Ctr	noSig	LOC105842948
1866	KWMTBOMO01866	0.423	1.022	2.018	1.08e-01	3.86e-01	-5.786	L5D3_OR_VS_L5D3_Ctr	noSig	LOC101742987
1867	KWMTBOMO01867	-0.604	0.633	-3.171	2.97e-02	1.75e-01	-4.354	L5D3_OR_VS_L5D3_Ctr	noSig	LOC101735520
1868	KWMTBOMO01868	-0.504	1.261	-3.896	1.47e-02	1.13e-01	-3.545	L5D3_OR_VS_L5D3_Ctr	noSig	NA
1869	KWMTBOMO01869	0.079	0.082	1.203	2.90e-01	6.90e-01	-6.782	L5D3_OR_VS_L5D3_Ctr	noSig	LOC105842092
1870	KWMTBOMO01870	0	0	0	1.00e+00	1.00e+00	-7.548	L5D3_OR_VS_L5D3_Ctr	noSig	LOC101735801
1871	KWMTBOMO01871	0.192	0.096	1.272	2.67e-01	6.74e-01	-6.705	L5D3_OR_VS_L5D3_Ctr	noSig	LOC101735929
1872	KWMTBOMO01872	0.788	2.072	5.446	4.21e-03	5.39e-02	-2.076	L5D3_OR_VS_L5D3_Ctr	noSig	LOC101736055
1873	KWMTBOMO01873	0	0	0	1.00e+00	1.00e+00	-7.548	L5D3_OR_VS_L5D3_Ctr	noSig	NA
1874	KWMTBOMO01874	0	0	0	1.00e+00	1.00e+00	-7.548	L5D3_OR_VS_L5D3_Ctr	noSig	LOC101736284
1875	KWMTBOMO01875	0.716	2.977	6.917	1.62e-03	3.38e-02	-0.953	L5D3_OR_VS_L5D3_Ctr	up	LOC101736413
1876	KWMTBOMO01876	-1.201	1.177	-5.781	3.33e-03	4.80e-02	-1.8	L5D3_OR_VS_L5D3_Ctr	down	LOC101736539
1877	KWMTBOMO01877	-0.311	4.471	-2.512	6.04e-02	2.75e-01	-5.157	L5D3_OR_VS_L5D3_Ctr	noSig	ccdc25
1878	KWMTBOMO01878	-0.701	5.31	-6.782	1.75e-03	3.47e-02	-1.047	L5D3_OR_VS_L5D3_Ctr	down	NA
1879	KWMTBOMO01879	-0.065	5.714	-0.41	7.01e-01	1.00e+00	-7.447	L5D3_OR_VS_L5D3_Ctr	noSig	LOC101736852
1880	KWMTBOMO01880	-0.03	3.102	-0.098	9.26e-01	1.00e+00	-7.542	L5D3_OR_VS_L5D3_Ctr	noSig	LOC101743553
1881	KWMTBOMO01881	-0.981	5.456	-6.124	2.64e-03	4.31e-02	-1.53	L5D3_OR_VS_L5D3_Ctr	down	DnaJ-9
1882	KWMTBOMO01882	0	0	0	1.00e+00	1.00e+00	-7.548	L5D3_OR_VS_L5D3_Ctr	noSig	LOC101737071
1883	KWMTBOMO01883	-1.684	3.42	-8.613	6.53e-04	2.26e-02	0.105	L5D3_OR_VS_L5D3_Ctr	down	LOC101743694
1884	KWMTBOMO01884	-0.099	0.199	-1.507	2.00e-01	5.62e-01	-6.428	L5D3_OR_VS_L5D3_Ctr	noSig	CTL4
1885	KWMTBOMO01885	-0.272	5.606	-1.689	1.60e-01	4.94e-01	-6.203	L5D3_OR_VS_L5D3_Ctr	noSig	DnaJ-1
1886	KWMTBOMO01886	0.007	1.416	0.029	9.78e-01	1.00e+00	-7.547	L5D3_OR_VS_L5D3_Ctr	noSig	LOC101737309
1887	KWMTBOMO01887	0	0	0	1.00e+00	1.00e+00	-7.548	L5D3_OR_VS_L5D3_Ctr	noSig	LOC101737546
1888	KWMTBOMO01888	-0.624	1.187	-4.85	6.57e-03	7.00e-02	-2.601	L5D3_OR_VS_L5D3_Ctr	noSig	LOC101743842
1889	KWMTBOMO01889	-0.417	0.35	-1.23	2.81e-01	6.90e-01	-6.753	L5D3_OR_VS_L5D3_Ctr	noSig	LOC101737784
1890	KWMTBOMO01890	-0.021	4.682	-0.167	8.75e-01	1.00e+00	-7.531	L5D3_OR_VS_L5D3_Ctr	noSig	LOC101738004
1891	KWMTBOMO01891	-0.254	0.164	-1.985	1.12e-01	3.95e-01	-5.828	L5D3_OR_VS_L5D3_Ctr	noSig	LOC101738132
1892	KWMTBOMO01892	-0.473	2.255	-2.523	5.97e-02	2.73e-01	-5.143	L5D3_OR_VS_L5D3_Ctr	noSig	LOC101738263
1893	KWMTBOMO01893	-1.459	3.431	-14.015	8.22e-05	1.14e-02	2.445	L5D3_OR_VS_L5D3_Ctr	down	LOC101743990
1894	KWMTBOMO01894	-1.735	4.979	-10.216	3.18e-04	1.81e-02	0.933	L5D3_OR_VS_L5D3_Ctr	down	LOC101738402
1895	KWMTBOMO01895	0.046	5.939	0.202	8.49e-01	1.00e+00	-7.523	L5D3_OR_VS_L5D3_Ctr	noSig	LOC101738669
1896	KWMTBOMO01896	-0.88	3.524	-12.409	1.39e-04	1.33e-02	1.87	L5D3_OR_VS_L5D3_Ctr	down	LOC101738537
1897	KWMTBOMO01897	-0.279	2.716	-1.039	3.53e-01	6.90e-01	-6.957	L5D3_OR_VS_L5D3_Ctr	noSig	LOC101744134
1898	KWMTBOMO01898	-0.194	0.435	-0.933	3.99e-01	7.38e-01	-7.061	L5D3_OR_VS_L5D3_Ctr	noSig	LOC105842368
1899	KWMTBOMO01899	0.231	1.558	1.417	2.23e-01	6.01e-01	-6.536	L5D3_OR_VS_L5D3_Ctr	noSig	LOC101744567
1900	KWMTBOMO01900	0.014	0.147	0.276	7.95e-01	1.00e+00	-7.501	L5D3_OR_VS_L5D3_Ctr	noSig	NA
1901	KWMTBOMO01901	-0.24	0.561	-1.767	1.46e-01	4.64e-01	-6.105	L5D3_OR_VS_L5D3_Ctr	noSig	NA
1902	KWMTBOMO01902	-0.059	0.356	-0.136	8.98e-01	1.00e+00	-7.536	L5D3_OR_VS_L5D3_Ctr	noSig	LOC101736034
1903	KWMTBOMO01903	-0.041	0.067	-0.47	6.61e-01	1.00e+00	-7.416	L5D3_OR_VS_L5D3_Ctr	noSig	NA
1904	KWMTBOMO01904	0	0	0	1.00e+00	1.00e+00	-7.548	L5D3_OR_VS_L5D3_Ctr	noSig	LOC101744709
1905	KWMTBOMO01905	0	0	0	1.00e+00	1.00e+00	-7.548	L5D3_OR_VS_L5D3_Ctr	noSig	LOC101744857
1906	KWMTBOMO01906	-0.046	0.047	-1.236	2.78e-01	6.90e-01	-6.745	L5D3_OR_VS_L5D3_Ctr	noSig	NA
1907	KWMTBOMO01907	0	0	0	1.00e+00	1.00e+00	-7.548	L5D3_OR_VS_L5D3_Ctr	noSig	Mir3324
1908	KWMTBOMO01908	-0.155	4.508	-1.162	3.04e-01	6.90e-01	-6.827	L5D3_OR_VS_L5D3_Ctr	noSig	LOC101739037
1909	KWMTBOMO01909	0.018	0.056	0.573	5.95e-01	9.55e-01	-7.354	L5D3_OR_VS_L5D3_Ctr	noSig	LOC101744998
1910	KWMTBOMO01910	-0.185	0.179	-1.231	2.80e-01	6.90e-01	-6.751	L5D3_OR_VS_L5D3_Ctr	noSig	LOC101739275
1911	KWMTBOMO01911	-0.023	0.049	-0.788	4.71e-01	8.22e-01	-7.193	L5D3_OR_VS_L5D3_Ctr	noSig	NA
1912	KWMTBOMO01912	-0.183	0.175	-0.686	5.27e-01	8.84e-01	-7.274	L5D3_OR_VS_L5D3_Ctr	noSig	NA
1913	KWMTBOMO01913	-1.061	4.826	-32.116	2.23e-06	3.56e-03	5.843	L5D3_OR_VS_L5D3_Ctr	down	LOC101739416
1914	KWMTBOMO01914	-0.903	5.124	-9.387	4.55e-04	2.01e-02	0.523	L5D3_OR_VS_L5D3_Ctr	down	LOC101739548
1915	KWMTBOMO01915	-0.069	3.556	-0.265	8.03e-01	1.00e+00	-7.505	L5D3_OR_VS_L5D3_Ctr	noSig	LOC101739791
1916	KWMTBOMO01916	-0.205	3.833	-2.42	6.71e-02	2.95e-01	-5.273	L5D3_OR_VS_L5D3_Ctr	noSig	LOC101745144
1917	KWMTBOMO01917	-1.197	3.575	-9.815	3.77e-04	1.94e-02	0.74	L5D3_OR_VS_L5D3_Ctr	down	LOC101740104
1918	KWMTBOMO01918	0.298	12.095	3.101	3.19e-02	1.82e-01	-4.437	L5D3_OR_VS_L5D3_Ctr	noSig	LOC733070
1919	KWMTBOMO01919	-0.779	3.084	-6.267	2.41e-03	4.12e-02	-1.422	L5D3_OR_VS_L5D3_Ctr	down	LOC101740238
1920	KWMTBOMO01920	-0.789	1.692	-3.512	2.11e-02	1.41e-01	-3.963	L5D3_OR_VS_L5D3_Ctr	noSig	LOC101740509
1921	KWMTBOMO01921	-1.018	3.216	-6.121	2.65e-03	4.32e-02	-1.533	L5D3_OR_VS_L5D3_Ctr	down	LOC101740375
1922	KWMTBOMO01922	0.005	0.002	0.991	3.73e-01	7.05e-01	-7.006	L5D3_OR_VS_L5D3_Ctr	noSig	LOC105842081
1923	KWMTBOMO01923	-0.238	1.17	-1.035	3.54e-01	6.90e-01	-6.961	L5D3_OR_VS_L5D3_Ctr	noSig	LOC101740647
1924	KWMTBOMO01924	-0.467	1.344	-4.192	1.13e-02	9.56e-02	-3.238	L5D3_OR_VS_L5D3_Ctr	noSig	LOC732885
1925	KWMTBOMO01925	-0.709	4.37	-5.243	4.87e-03	5.87e-02	-2.25	L5D3_OR_VS_L5D3_Ctr	noSig	LOC101740790
1926	KWMTBOMO01926	1.289	7.682	3.419	2.32e-02	1.49e-01	-4.068	L5D3_OR_VS_L5D3_Ctr	noSig	LOC101740932
1927	KWMTBOMO01927	-1.354	8.734	-10.337	3.03e-04	1.79e-02	0.99	L5D3_OR_VS_L5D3_Ctr	down	LOC693023
1928	KWMTBOMO01928	-0.419	3.72	-2.56	5.73e-02	2.65e-01	-5.097	L5D3_OR_VS_L5D3_Ctr	noSig	LOC101741308
1929	KWMTBOMO01929	-0.282	3.728	-2.142	9.27e-02	3.60e-01	-5.627	L5D3_OR_VS_L5D3_Ctr	noSig	LOC101741636
1930	KWMTBOMO01930	-1.095	3.821	-6.452	2.14e-03	3.84e-02	-1.284	L5D3_OR_VS_L5D3_Ctr	down	LOC101741495
1931	KWMTBOMO01931	-1.311	3.94	-6.903	1.63e-03	3.39e-02	-0.962	L5D3_OR_VS_L5D3_Ctr	down	NA
1932	KWMTBOMO01932	-0.314	5.27	-3.038	3.41e-02	1.90e-01	-4.512	L5D3_OR_VS_L5D3_Ctr	noSig	LOC101741970
1933	KWMTBOMO01933	0.949	7.134	5.59	3.80e-03	5.17e-02	-1.956	L5D3_OR_VS_L5D3_Ctr	noSig	LOC101741774
1934	KWMTBOMO01934	0.272	0.215	2.485	6.23e-02	2.81e-01	-5.192	L5D3_OR_VS_L5D3_Ctr	noSig	NA
1935	KWMTBOMO01935	-0.842	0.724	-3.569	2.00e-02	1.36e-01	-3.899	L5D3_OR_VS_L5D3_Ctr	noSig	NA
1936	KWMTBOMO01936	-0.783	3.256	-5.033	5.71e-03	6.45e-02	-2.436	L5D3_OR_VS_L5D3_Ctr	noSig	LOC101742404
1937	KWMTBOMO01937	-1.089	4.438	-6.167	2.57e-03	4.25e-02	-1.498	L5D3_OR_VS_L5D3_Ctr	down	LOC101742645
1938	KWMTBOMO01938	-0.952	4.288	-13.816	8.75e-05	1.14e-02	2.378	L5D3_OR_VS_L5D3_Ctr	down	LOC692918
1939	KWMTBOMO01939	-0.455	4.946	-6.986	1.55e-03	3.33e-02	-0.905	L5D3_OR_VS_L5D3_Ctr	noSig	LOC101742797
1940	KWMTBOMO01940	-0.689	3.232	-5.494	4.06e-03	5.32e-02	-2.036	L5D3_OR_VS_L5D3_Ctr	noSig	pofut1
1941	KWMTBOMO01941	0.42	12.409	3.719	1.73e-02	1.25e-01	-3.735	L5D3_OR_VS_L5D3_Ctr	noSig	RpL35
1942	KWMTBOMO01942	0.116	0.108	1.746	1.49e-01	4.72e-01	-6.132	L5D3_OR_VS_L5D3_Ctr	noSig	LOC105842570
1943	KWMTBOMO01943	0	0	0	1.00e+00	1.00e+00	-7.548	L5D3_OR_VS_L5D3_Ctr	noSig	LOC105842077
1944	KWMTBOMO01944	-0.477	2.71	-1.634	1.71e-01	5.13e-01	-6.272	L5D3_OR_VS_L5D3_Ctr	noSig	LOC101743128
1945	KWMTBOMO01945	-0.301	2.645	-1.13	3.16e-01	6.90e-01	-6.862	L5D3_OR_VS_L5D3_Ctr	noSig	LOC101743272
1946	KWMTBOMO01946	-0.285	3.386	-1.427	2.21e-01	5.97e-01	-6.525	L5D3_OR_VS_L5D3_Ctr	noSig	LOC101743412
1947	KWMTBOMO01947	-2.32	4.688	-12.402	1.39e-04	1.33e-02	1.867	L5D3_OR_VS_L5D3_Ctr	down	LOC101745577
1948	KWMTBOMO01948	-0.864	2.925	-2.443	6.54e-02	2.91e-01	-5.244	L5D3_OR_VS_L5D3_Ctr	noSig	LOC101743552
1949	KWMTBOMO01949	0.067	0.034	1.047	3.49e-01	6.90e-01	-6.948	L5D3_OR_VS_L5D3_Ctr	noSig	LOC105842018
1950	KWMTBOMO01950	-0.222	0.269	-3.273	2.68e-02	1.64e-01	-4.236	L5D3_OR_VS_L5D3_Ctr	noSig	LOC733065
1951	KWMTBOMO01951	-0.181	0.616	-0.535	6.18e-01	9.80e-01	-7.378	L5D3_OR_VS_L5D3_Ctr	noSig	LOC101743693
1952	KWMTBOMO01952	-0.817	3.578	-4.609	7.98e-03	7.85e-02	-2.828	L5D3_OR_VS_L5D3_Ctr	noSig	LOC101743942
1953	KWMTBOMO01953	-0.433	4.14	-2.077	1.00e-01	3.73e-01	-5.71	L5D3_OR_VS_L5D3_Ctr	noSig	LOC101744091
1954	KWMTBOMO01954	0	0	0	1.00e+00	1.00e+00	-7.548	L5D3_OR_VS_L5D3_Ctr	noSig	LOC101744234
1955	KWMTBOMO01955	-0.542	1.422	-2.397	6.89e-02	2.99e-01	-5.302	L5D3_OR_VS_L5D3_Ctr	noSig	LOC101744474
1956	KWMTBOMO01956	-0.958	4.171	-4.931	6.17e-03	6.76e-02	-2.528	L5D3_OR_VS_L5D3_Ctr	noSig	LOC101737999
1957	KWMTBOMO01957	-0.027	0.023	-0.753	4.90e-01	8.42e-01	-7.221	L5D3_OR_VS_L5D3_Ctr	noSig	NA
1958	KWMTBOMO01958	-0.774	3.174	-5.038	5.69e-03	6.44e-02	-2.431	L5D3_OR_VS_L5D3_Ctr	noSig	LOC101738345
1959	KWMTBOMO01959	-0.08	0.063	-0.79	4.70e-01	8.21e-01	-7.191	L5D3_OR_VS_L5D3_Ctr	noSig	NA
1960	KWMTBOMO01960	0	0	0	1.00e+00	1.00e+00	-7.548	L5D3_OR_VS_L5D3_Ctr	noSig	LOC101740476
1961	KWMTBOMO01961	-1.513	2.668	-20.089	1.73e-05	7.40e-03	4.063	L5D3_OR_VS_L5D3_Ctr	down	LOC101740615
1962	KWMTBOMO01962	0.212	2.996	0.874	4.28e-01	7.72e-01	-7.117	L5D3_OR_VS_L5D3_Ctr	noSig	LOC101740986
1963	KWMTBOMO01963	-0.643	0.429	-2.69	4.95e-02	2.43e-01	-4.935	L5D3_OR_VS_L5D3_Ctr	noSig	NA
1964	KWMTBOMO01964	-1.013	1.763	-2.529	5.93e-02	2.72e-01	-5.136	L5D3_OR_VS_L5D3_Ctr	noSig	LOC101741788
1965	KWMTBOMO01965	-0.929	3.634	-5.117	5.35e-03	6.22e-02	-2.36	L5D3_OR_VS_L5D3_Ctr	noSig	LOC101735329
1966	KWMTBOMO01966	-0.823	3.343	-4.952	6.07e-03	6.68e-02	-2.508	L5D3_OR_VS_L5D3_Ctr	noSig	LOC101735555
1967	KWMTBOMO01967	-0.089	0.073	-1.383	2.33e-01	6.18e-01	-6.576	L5D3_OR_VS_L5D3_Ctr	noSig	LOC101736891
1968	KWMTBOMO01968	-0.305	0.578	-4.593	8.08e-03	7.90e-02	-2.843	L5D3_OR_VS_L5D3_Ctr	noSig	LOC101735695
1969	KWMTBOMO01969	-0.886	1.855	-4.293	1.04e-02	9.11e-02	-3.136	L5D3_OR_VS_L5D3_Ctr	noSig	LOC101735833
1970	KWMTBOMO01970	-1.147	1.409	-4.489	8.80e-03	8.33e-02	-2.943	L5D3_OR_VS_L5D3_Ctr	noSig	LOC101736482
1971	KWMTBOMO01971	-0.834	6.107	-11.194	2.16e-04	1.62e-02	1.375	L5D3_OR_VS_L5D3_Ctr	down	LOC101736364
1972	KWMTBOMO01972	-0.283	4.441	-1.944	1.18e-01	4.07e-01	-5.881	L5D3_OR_VS_L5D3_Ctr	noSig	LOC101739103
1973	KWMTBOMO01973	0.274	0.381	1.883	1.27e-01	4.27e-01	-5.959	L5D3_OR_VS_L5D3_Ctr	noSig	LOC101736620
1974	KWMTBOMO01974	0	0	0	1.00e+00	1.00e+00	-7.548	L5D3_OR_VS_L5D3_Ctr	noSig	NA
1975	KWMTBOMO01975	0.205	0.495	1.186	2.96e-01	6.90e-01	-6.801	L5D3_OR_VS_L5D3_Ctr	noSig	Let-2
1976	KWMTBOMO01976	-0.636	2.523	-7.237	1.34e-03	3.07e-02	-0.736	L5D3_OR_VS_L5D3_Ctr	down	LOC101736233
1977	KWMTBOMO01977	-0.315	3.138	-1.477	2.08e-01	5.75e-01	-6.464	L5D3_OR_VS_L5D3_Ctr	noSig	LOC101746270
1978	KWMTBOMO01978	-0.657	3.765	-6.345	2.29e-03	3.99e-02	-1.363	L5D3_OR_VS_L5D3_Ctr	down	LOC101746643
1979	KWMTBOMO01979	-1.001	2.855	-7.31	1.29e-03	2.98e-02	-0.687	L5D3_OR_VS_L5D3_Ctr	down	LOC101746127
1980	KWMTBOMO01980	-0.014	0.007	-1.041	3.52e-01	6.90e-01	-6.955	L5D3_OR_VS_L5D3_Ctr	noSig	LOC101741843
1981	KWMTBOMO01981	-0.009	0.037	-0.177	8.67e-01	1.00e+00	-7.529	L5D3_OR_VS_L5D3_Ctr	noSig	LOC101739340
1982	KWMTBOMO01982	-0.113	2.946	-0.432	6.86e-01	1.00e+00	-7.436	L5D3_OR_VS_L5D3_Ctr	noSig	LOC101741232
1983	KWMTBOMO01983	-0.849	1.231	-5.66	3.61e-03	5.02e-02	-1.898	L5D3_OR_VS_L5D3_Ctr	noSig	LOC101744558
1984	KWMTBOMO01984	-0.945	2.724	-9.302	4.73e-04	2.03e-02	0.479	L5D3_OR_VS_L5D3_Ctr	down	LOC101744846
1985	KWMTBOMO01985	-0.023	0.017	-1.114	3.22e-01	6.90e-01	-6.879	L5D3_OR_VS_L5D3_Ctr	noSig	NA
1986	KWMTBOMO01986	0	0	0	1.00e+00	1.00e+00	-7.548	L5D3_OR_VS_L5D3_Ctr	noSig	NGR-A31
1987	KWMTBOMO01987	0	0	0	1.00e+00	1.00e+00	-7.548	L5D3_OR_VS_L5D3_Ctr	noSig	NA
1988	KWMTBOMO01988	0.106	0.227	0.903	4.13e-01	7.55e-01	-7.09	L5D3_OR_VS_L5D3_Ctr	noSig	LOC100533206
1989	KWMTBOMO01989	-0.196	4.744	-0.864	4.32e-01	7.78e-01	-7.125	L5D3_OR_VS_L5D3_Ctr	noSig	LOC101746317
1990	KWMTBOMO01990	0.023	0.012	1.045	3.50e-01	6.90e-01	-6.951	L5D3_OR_VS_L5D3_Ctr	noSig	LOC101746456
1991	KWMTBOMO01991	-0.389	1.101	-2.175	8.92e-02	3.52e-01	-5.585	L5D3_OR_VS_L5D3_Ctr	noSig	LOC101743398
1992	KWMTBOMO01992	0	0	0	1.00e+00	1.00e+00	-7.548	L5D3_OR_VS_L5D3_Ctr	noSig	LOC101743678
1993	KWMTBOMO01993	-0.024	3.245	-0.07	9.48e-01	1.00e+00	-7.545	L5D3_OR_VS_L5D3_Ctr	noSig	SRC
1994	KWMTBOMO01994	-0.263	2.959	-0.796	4.67e-01	8.18e-01	-7.186	L5D3_OR_VS_L5D3_Ctr	noSig	NA
1995	KWMTBOMO01995	-0.183	2.938	-0.745	4.94e-01	8.47e-01	-7.228	L5D3_OR_VS_L5D3_Ctr	noSig	NA
1996	KWMTBOMO01996	-0.276	3.555	-1.14	3.13e-01	6.90e-01	-6.851	L5D3_OR_VS_L5D3_Ctr	noSig	LOC101741810
1997	KWMTBOMO01997	-0.361	3.18	-1.682	1.61e-01	4.96e-01	-6.212	L5D3_OR_VS_L5D3_Ctr	noSig	LOC101742102
1998	KWMTBOMO01998	-0.171	0.118	-1.076	3.38e-01	6.90e-01	-6.919	L5D3_OR_VS_L5D3_Ctr	noSig	LOC101743827
1999	KWMTBOMO01999	-0.51	3.853	-1.83	1.35e-01	4.43e-01	-6.025	L5D3_OR_VS_L5D3_Ctr	noSig	LOC101737857
[truncated: 14,880 more rows]

## Sheet: 2-L5D6 Yki overexpressing
	gene_name	logFC	AveExpr	t	P.Value	adj.P.Val	B	Compare	Sign_group	NCBI_id
1	KWMTBOMO00001	-0.082	0.189	-0.695	5.22e-01	0.84	-7.533	L5D6_OR_VS_L5D6_Ctr	noSig	LOC101740329
2	KWMTBOMO00002	-0.054	0.027	-1.047	3.49e-01	0.631	-7.214	L5D6_OR_VS_L5D6_Ctr	noSig	NA
3	KWMTBOMO00003	0.033	0.017	2.028	1.06e-01	0.316	-6.036	L5D6_OR_VS_L5D6_Ctr	noSig	LOC101741181
4	KWMTBOMO00004	0.241	1.917	8.196	8.02e-04	0.0115	-0.356	L5D6_OR_VS_L5D6_Ctr	noSig	LOC101739479
5	KWMTBOMO00005	-0.198	1.687	-1.544	1.91e-01	0.479	-6.647	L5D6_OR_VS_L5D6_Ctr	noSig	NA
6	KWMTBOMO00006	-0.148	4.407	-1.406	2.26e-01	0.539	-6.814	L5D6_OR_VS_L5D6_Ctr	noSig	LOC101741407
7	KWMTBOMO00007	-0.635	1.695	-5.427	4.26e-03	0.0325	-2.338	L5D6_OR_VS_L5D6_Ctr	down	LOC101739615
8	KWMTBOMO00008	-0.265	0.542	-1.775	1.44e-01	0.391	-6.358	L5D6_OR_VS_L5D6_Ctr	noSig	NA
9	KWMTBOMO00009	0	0	0	1.00e+00	1	-7.814	L5D6_OR_VS_L5D6_Ctr	noSig	NA
10	KWMTBOMO00010	-0.047	0.023	-2.091	9.85e-02	0.304	-5.955	L5D6_OR_VS_L5D6_Ctr	noSig	NA
11	KWMTBOMO00011	0	0	0	1.00e+00	1	-7.814	L5D6_OR_VS_L5D6_Ctr	noSig	LOC101741740
12	KWMTBOMO00012	-0.667	0.333	-2.715	4.82e-02	0.182	-5.165	L5D6_OR_VS_L5D6_Ctr	noSig	NA
13	KWMTBOMO00013	-0.607	0.304	-2.095	9.80e-02	0.304	-5.95	L5D6_OR_VS_L5D6_Ctr	noSig	NA
14	KWMTBOMO00014	-0.845	1.45	-2.738	4.70e-02	0.179	-5.137	L5D6_OR_VS_L5D6_Ctr	noSig	NA
15	KWMTBOMO00015	-0.411	0.264	-1.386	2.32e-01	0.549	-6.838	L5D6_OR_VS_L5D6_Ctr	noSig	LOC101739758
16	KWMTBOMO00016	-0.03	0.117	-0.791	4.70e-01	0.777	-7.456	L5D6_OR_VS_L5D6_Ctr	noSig	NA
17	KWMTBOMO00017	0.019	0.009	1.044	3.50e-01	0.631	-7.217	L5D6_OR_VS_L5D6_Ctr	noSig	LOC101741886
18	KWMTBOMO00018	-0.063	0.032	-1.047	3.49e-01	0.631	-7.214	L5D6_OR_VS_L5D6_Ctr	noSig	LOC101742177
19	KWMTBOMO00019	0	0	0	1.00e+00	1	-7.814	L5D6_OR_VS_L5D6_Ctr	noSig	tan
20	KWMTBOMO00020	0.149	6.272	1.234	2.79e-01	0.628	-7.012	L5D6_OR_VS_L5D6_Ctr	noSig	LOC101742318
21	KWMTBOMO00021	-0.052	2.579	-0.275	7.96e-01	1	-7.768	L5D6_OR_VS_L5D6_Ctr	noSig	LOC732936
22	KWMTBOMO00022	-1.293	1.898	-10.98	2.34e-04	0.00585	1.096	L5D6_OR_VS_L5D6_Ctr	down	LOC101742469
23	KWMTBOMO00023	-0.514	0.781	-2.792	4.43e-02	0.172	-5.071	L5D6_OR_VS_L5D6_Ctr	noSig	LOC101740028
24	KWMTBOMO00024	-0.08	1.654	-0.494	6.45e-01	0.975	-7.668	L5D6_OR_VS_L5D6_Ctr	noSig	LOC101740159
25	KWMTBOMO00025	-0.046	0.023	-1.047	3.49e-01	0.631	-7.214	L5D6_OR_VS_L5D6_Ctr	noSig	LOC101742610
26	KWMTBOMO00026	0	0	0	1.00e+00	1	-7.814	L5D6_OR_VS_L5D6_Ctr	noSig	LOC101742756
27	KWMTBOMO00027	-0.124	0.174	-0.791	4.70e-01	0.777	-7.455	L5D6_OR_VS_L5D6_Ctr	noSig	LOC101740430
28	KWMTBOMO00028	0	0	0	1.00e+00	1	-7.814	L5D6_OR_VS_L5D6_Ctr	noSig	LOC101743052
29	KWMTBOMO00029	0	0	0	1.00e+00	1	-7.814	L5D6_OR_VS_L5D6_Ctr	noSig	LOC101742910
30	KWMTBOMO00030	0	0	0	1.00e+00	1	-7.814	L5D6_OR_VS_L5D6_Ctr	noSig	NA
31	KWMTBOMO00031	-0.074	0.606	-0.602	5.77e-01	0.904	-7.6	L5D6_OR_VS_L5D6_Ctr	noSig	LOC101740565
32	KWMTBOMO00032	0	0	0	1.00e+00	1	-7.814	L5D6_OR_VS_L5D6_Ctr	noSig	NA
33	KWMTBOMO00033	0.019	0.009	1.044	3.50e-01	0.631	-7.217	L5D6_OR_VS_L5D6_Ctr	noSig	LOC101743283
34	KWMTBOMO00034	0	0	0	1.00e+00	1	-7.814	L5D6_OR_VS_L5D6_Ctr	noSig	NA
35	KWMTBOMO00035	0	0	0	1.00e+00	1	-7.814	L5D6_OR_VS_L5D6_Ctr	noSig	LOC101739644
36	KWMTBOMO00036	-0.041	0.021	-1.047	3.49e-01	0.631	-7.214	L5D6_OR_VS_L5D6_Ctr	noSig	LOC101740839
37	KWMTBOMO00037	0.028	0.014	1.046	3.50e-01	0.631	-7.215	L5D6_OR_VS_L5D6_Ctr	noSig	LOC101743424
38	KWMTBOMO00038	-0.054	0.027	-1.047	3.49e-01	0.631	-7.214	L5D6_OR_VS_L5D6_Ctr	noSig	NA
39	KWMTBOMO00039	1.394	2.938	3.672	1.81e-02	0.0886	-4.043	L5D6_OR_VS_L5D6_Ctr	noSig	LOC101743564
40	KWMTBOMO00040	-0.052	0.094	-0.593	5.83e-01	0.91	-7.607	L5D6_OR_VS_L5D6_Ctr	noSig	LOC101741126
41	KWMTBOMO00041	0	0	0	1.00e+00	1	-7.814	L5D6_OR_VS_L5D6_Ctr	noSig	NA
42	KWMTBOMO00042	0	0	0	1.00e+00	1	-7.814	L5D6_OR_VS_L5D6_Ctr	noSig	LOC101743705
43	KWMTBOMO00043	-0.331	0.669	-0.693	5.23e-01	0.843	-7.535	L5D6_OR_VS_L5D6_Ctr	noSig	NA
44	KWMTBOMO00044	-0.606	0.94	-1.069	3.40e-01	0.631	-7.192	L5D6_OR_VS_L5D6_Ctr	noSig	LOC101743858
45	KWMTBOMO00045	-1.096	1.113	-3.849	1.54e-02	0.0788	-3.85	L5D6_OR_VS_L5D6_Ctr	noSig	LOC101744149
46	KWMTBOMO00046	-1.052	1.034	-3.26	2.71e-02	0.119	-4.51	L5D6_OR_VS_L5D6_Ctr	noSig	NA
47	KWMTBOMO00047	-0.204	3.024	-0.771	4.80e-01	0.79	-7.472	L5D6_OR_VS_L5D6_Ctr	noSig	LOC101744289
48	KWMTBOMO00048	0	0	0	1.00e+00	1	-7.814	L5D6_OR_VS_L5D6_Ctr	noSig	NA
49	KWMTBOMO00049	0	0	0	1.00e+00	1	-7.814	L5D6_OR_VS_L5D6_Ctr	noSig	NA
50	KWMTBOMO00050	0.51	0.722	2.021	1.07e-01	0.318	-6.045	L5D6_OR_VS_L5D6_Ctr	noSig	LOC101741268
51	KWMTBOMO00051	-0.817	2.322	-4.945	6.10e-03	0.0414	-2.764	L5D6_OR_VS_L5D6_Ctr	down	LOC101744433
52	KWMTBOMO00052	0.035	1.882	0.161	8.79e-01	1	-7.798	L5D6_OR_VS_L5D6_Ctr	noSig	LOC101744817
53	KWMTBOMO00053	0	0	0	1.00e+00	1	-7.814	L5D6_OR_VS_L5D6_Ctr	noSig	L130
54	KWMTBOMO00054	0	0	0	1.00e+00	1	-7.814	L5D6_OR_VS_L5D6_Ctr	noSig	NA
55	KWMTBOMO00055	0	0	0	1.00e+00	1	-7.814	L5D6_OR_VS_L5D6_Ctr	noSig	LOC101741548
56	KWMTBOMO00056	-0.107	0.114	-0.92	4.05e-01	0.697	-7.339	L5D6_OR_VS_L5D6_Ctr	noSig	LOC101741691
57	KWMTBOMO00057	-0.705	3.188	-4.784	6.92e-03	0.0451	-2.912	L5D6_OR_VS_L5D6_Ctr	down	LOC101736132
58	KWMTBOMO00058	0.005	0.107	0.067	9.50e-01	1	-7.811	L5D6_OR_VS_L5D6_Ctr	noSig	NA
59	KWMTBOMO00059	-0.068	0.628	-0.702	5.18e-01	0.836	-7.528	L5D6_OR_VS_L5D6_Ctr	noSig	Bmptp-Z
60	KWMTBOMO00060	-1.037	3.06	-8.307	7.58e-04	0.0111	-0.289	L5D6_OR_VS_L5D6_Ctr	down	LOC105842517
61	KWMTBOMO00061	-0.45	0.426	-6.483	2.10e-03	0.0204	-1.499	L5D6_OR_VS_L5D6_Ctr	noSig	LOC101741988
62	KWMTBOMO00062	0	0	0	1.00e+00	1	-7.814	L5D6_OR_VS_L5D6_Ctr	noSig	NA
63	KWMTBOMO00063	-0.013	1.031	-0.02	9.85e-01	1	-7.813	L5D6_OR_VS_L5D6_Ctr	noSig	NA
64	KWMTBOMO00064	-0.175	2.431	-0.873	4.28e-01	0.726	-7.383	L5D6_OR_VS_L5D6_Ctr	noSig	LOC101745111
65	KWMTBOMO00065	-0.545	3.327	-3.729	1.72e-02	0.0854	-3.98	L5D6_OR_VS_L5D6_Ctr	noSig	LOC101745262
66	KWMTBOMO00066	0	0	0	1.00e+00	1	-7.814	L5D6_OR_VS_L5D6_Ctr	noSig	LOC110386353
67	KWMTBOMO00067	-0.889	5.105	-7.634	1.08e-03	0.0136	-0.705	L5D6_OR_VS_L5D6_Ctr	down	LOC101745405
68	KWMTBOMO00068	-1.206	3.44	-4.77	7.00e-03	0.0455	-2.926	L5D6_OR_VS_L5D6_Ctr	down	BLOS2
69	KWMTBOMO00069	-0.018	0.023	-0.54	6.15e-01	0.944	-7.641	L5D6_OR_VS_L5D6_Ctr	noSig	LOC101742128
70	KWMTBOMO00070	0.023	0.012	1.046	3.50e-01	0.631	-7.216	L5D6_OR_VS_L5D6_Ctr	noSig	LOC101742648
71	KWMTBOMO00071	0.08	0.04	17.356	3.26e-05	0.0024	3.342	L5D6_OR_VS_L5D6_Ctr	noSig	NA
72	KWMTBOMO00072	-1.917	1.116	-14.67	6.74e-05	0.00326	2.528	L5D6_OR_VS_L5D6_Ctr	down	NA
73	KWMTBOMO00073	0	0	0	1.00e+00	1	-7.814	L5D6_OR_VS_L5D6_Ctr	noSig	LOC105842242
74	KWMTBOMO00074	0.041	0.079	0.497	6.43e-01	0.974	-7.666	L5D6_OR_VS_L5D6_Ctr	noSig	NA
75	KWMTBOMO00075	-0.128	0.134	-1.784	1.43e-01	0.388	-6.348	L5D6_OR_VS_L5D6_Ctr	noSig	NA
76	KWMTBOMO00076	-0.172	0.086	-1.048	3.49e-01	0.631	-7.213	L5D6_OR_VS_L5D6_Ctr	noSig	LOC101745545
77	KWMTBOMO00077	-0.014	0.007	-1.042	3.51e-01	0.631	-7.219	L5D6_OR_VS_L5D6_Ctr	noSig	LOC101742420
78	KWMTBOMO00078	0	0	0	1.00e+00	1	-7.814	L5D6_OR_VS_L5D6_Ctr	noSig	NA
79	KWMTBOMO00079	-0.407	0.38	-3.279	2.66e-02	0.117	-4.487	L5D6_OR_VS_L5D6_Ctr	noSig	LOC101745928
80	KWMTBOMO00080	-0.158	1.54	-3.412	2.33e-02	0.106	-4.334	L5D6_OR_VS_L5D6_Ctr	noSig	LOC101742566
81	KWMTBOMO00081	-0.027	3.519	-0.386	7.18e-01	1	-7.724	L5D6_OR_VS_L5D6_Ctr	noSig	LOC101746314
82	KWMTBOMO00082	0.584	0.838	3.671	1.81e-02	0.0886	-4.044	L5D6_OR_VS_L5D6_Ctr	noSig	LOC101735720
83	KWMTBOMO00083	0.739	2.74	3.628	1.89e-02	0.0913	-4.092	L5D6_OR_VS_L5D6_Ctr	noSig	NA
84	KWMTBOMO00084	-0.301	0.267	-1.056	3.46e-01	0.631	-7.205	L5D6_OR_VS_L5D6_Ctr	noSig	NA
85	KWMTBOMO00085	-0.441	0.317	-2.469	6.34e-02	0.224	-5.473	L5D6_OR_VS_L5D6_Ctr	noSig	LOC101746452
86	KWMTBOMO00086	-0.033	0.149	-0.35	7.43e-01	1	-7.74	L5D6_OR_VS_L5D6_Ctr	noSig	LOC101746594
87	KWMTBOMO00087	0	0	0	1.00e+00	1	-7.814	L5D6_OR_VS_L5D6_Ctr	noSig	NA
88	KWMTBOMO00088	0	0	0	1.00e+00	1	-7.814	L5D6_OR_VS_L5D6_Ctr	noSig	LOC101746820
89	KWMTBOMO00089	-0.637	1.429	-8.417	7.18e-04	0.0107	-0.224	L5D6_OR_VS_L5D6_Ctr	down	LOC101742707
90	KWMTBOMO00090	-0.313	0.807	-1.484	2.06e-01	0.503	-6.72	L5D6_OR_VS_L5D6_Ctr	noSig	LOC101742856
91	KWMTBOMO00091	0.042	0.192	0.675	5.34e-01	0.854	-7.548	L5D6_OR_VS_L5D6_Ctr	noSig	LOC101742998
92	KWMTBOMO00092	-1.383	1.288	-14.828	6.44e-05	0.00322	2.58	L5D6_OR_VS_L5D6_Ctr	down	LOC101739801
93	KWMTBOMO00093	-1.39	1.062	-2.913	3.89e-02	0.155	-4.922	L5D6_OR_VS_L5D6_Ctr	noSig	NA
94	KWMTBOMO00094	-0.838	1.11	-8.103	8.41e-04	0.0118	-0.412	L5D6_OR_VS_L5D6_Ctr	down	LOC101746961
95	KWMTBOMO00095	-0.278	0.139	-1.562	1.87e-01	0.472	-6.625	L5D6_OR_VS_L5D6_Ctr	noSig	NA
96	KWMTBOMO00096	0	0	0	1.00e+00	1	-7.814	L5D6_OR_VS_L5D6_Ctr	noSig	LOC100750224
97	KWMTBOMO00097	-0.412	5.285	-2.506	6.09e-02	0.217	-5.427	L5D6_OR_VS_L5D6_Ctr	noSig	LOC101735670
98	KWMTBOMO00098	0.059	3.245	0.283	7.90e-01	1	-7.765	L5D6_OR_VS_L5D6_Ctr	noSig	LOC101735897
99	KWMTBOMO00099	-0.322	3.073	-1.582	1.83e-01	0.464	-6.6	L5D6_OR_VS_L5D6_Ctr	noSig	LOC101736024
100	KWMTBOMO00100	-0.408	0.218	-5.555	3.89e-03	0.0306	-2.23	L5D6_OR_VS_L5D6_Ctr	noSig	LOC101743284
101	KWMTBOMO00101	-0.009	0.014	-0.462	6.66e-01	0.997	-7.686	L5D6_OR_VS_L5D6_Ctr	noSig	NA
102	KWMTBOMO00102	0.055	0.211	0.411	7.00e-01	1	-7.712	L5D6_OR_VS_L5D6_Ctr	noSig	LOC101743425
103	KWMTBOMO00103	0	0	0	1.00e+00	1	-7.814	L5D6_OR_VS_L5D6_Ctr	noSig	LOC101736161
104	KWMTBOMO00104	-0.389	1.213	-3.02	3.47e-02	0.143	-4.793	L5D6_OR_VS_L5D6_Ctr	noSig	LOC101736377
105	KWMTBOMO00105	-0.261	2.134	-0.967	3.84e-01	0.668	-7.294	L5D6_OR_VS_L5D6_Ctr	noSig	LOC101736593
106	KWMTBOMO00106	0.311	2.098	1.181	2.98e-01	0.631	-7.072	L5D6_OR_VS_L5D6_Ctr	noSig	LOC101736825
107	KWMTBOMO00107	-0.184	0.185	-3.143	3.06e-02	0.13	-4.646	L5D6_OR_VS_L5D6_Ctr	noSig	NA
108	KWMTBOMO00108	0.633	1.904	1.537	1.93e-01	0.482	-6.655	L5D6_OR_VS_L5D6_Ctr	noSig	NA
109	KWMTBOMO00109	0.025	0.774	0.11	9.17e-01	1	-7.806	L5D6_OR_VS_L5D6_Ctr	noSig	LOC101743706
110	KWMTBOMO00110	0	0	0	1.00e+00	1	-7.814	L5D6_OR_VS_L5D6_Ctr	noSig	LOC101737036
111	KWMTBOMO00111	-0.071	0.036	-1.047	3.49e-01	0.631	-7.214	L5D6_OR_VS_L5D6_Ctr	noSig	Bmap-A
112	KWMTBOMO00112	-0.109	0.054	-2.095	9.81e-02	0.304	-5.951	L5D6_OR_VS_L5D6_Ctr	noSig	ap
113	KWMTBOMO00113	0	0	0	1.00e+00	1	-7.814	L5D6_OR_VS_L5D6_Ctr	noSig	LOC105842502
114	KWMTBOMO00114	-0.009	0.05	-0.127	9.04e-01	1	-7.804	L5D6_OR_VS_L5D6_Ctr	noSig	NA
115	KWMTBOMO00115	0	0	0	1.00e+00	1	-7.814	L5D6_OR_VS_L5D6_Ctr	noSig	NA
116	KWMTBOMO00116	-0.106	0.109	-1.159	3.06e-01	0.631	-7.096	L5D6_OR_VS_L5D6_Ctr	noSig	NA
117	KWMTBOMO00117	0.064	0.074	1.302	2.57e-01	0.592	-6.935	L5D6_OR_VS_L5D6_Ctr	noSig	NA
118	KWMTBOMO00118	-0.065	0.032	-1.888	1.26e-01	0.356	-6.216	L5D6_OR_VS_L5D6_Ctr	noSig	LOC101744290
119	KWMTBOMO00119	0	0	0	1.00e+00	1	-7.814	L5D6_OR_VS_L5D6_Ctr	noSig	LOC101744434
120	KWMTBOMO00120	-0.106	0.2	-0.587	5.86e-01	0.914	-7.611	L5D6_OR_VS_L5D6_Ctr	noSig	LOC101744584
121	KWMTBOMO00121	0	0	0	1.00e+00	1	-7.814	L5D6_OR_VS_L5D6_Ctr	noSig	LOC101737320
122	KWMTBOMO00122	1.034	2.19	4.217	1.11e-02	0.0628	-3.466	L5D6_OR_VS_L5D6_Ctr	noSig	LOC101737462
123	KWMTBOMO00123	0.013	0.049	0.33	7.57e-01	1	-7.748	L5D6_OR_VS_L5D6_Ctr	noSig	LOC101737605
124	KWMTBOMO00124	-1.323	1.925	-6.221	2.48e-03	0.0228	-1.696	L5D6_OR_VS_L5D6_Ctr	down	LOC101744726
125	KWMTBOMO00125	0	0	0	1.00e+00	1	-7.814	L5D6_OR_VS_L5D6_Ctr	noSig	NA
126	KWMTBOMO00126	0	0	0	1.00e+00	1	-7.814	L5D6_OR_VS_L5D6_Ctr	noSig	Mtnr
127	KWMTBOMO00127	-0.249	0.643	-2.338	7.37e-02	0.25	-5.639	L5D6_OR_VS_L5D6_Ctr	noSig	LOC101737840
128	KWMTBOMO00128	-0.205	0.222	-1.076	3.37e-01	0.631	-7.184	L5D6_OR_VS_L5D6_Ctr	noSig	NA
129	KWMTBOMO00129	-0.229	1.882	-1.002	3.68e-01	0.649	-7.26	L5D6_OR_VS_L5D6_Ctr	noSig	LOC101737973
130	KWMTBOMO00130	0.23	1.466	0.944	3.94e-01	0.682	-7.316	L5D6_OR_VS_L5D6_Ctr	noSig	NA
131	KWMTBOMO00131	-0.023	2.252	-0.21	8.43e-01	1	-7.787	L5D6_OR_VS_L5D6_Ctr	noSig	LOC101744871
132	KWMTBOMO00132	0	0	0	1.00e+00	1	-7.814	L5D6_OR_VS_L5D6_Ctr	noSig	LOC105842495
133	KWMTBOMO00133	0	0	0	1.00e+00	1	-7.814	L5D6_OR_VS_L5D6_Ctr	noSig	NA
134	KWMTBOMO00134	0	0	0	1.00e+00	1	-7.814	L5D6_OR_VS_L5D6_Ctr	noSig	NA
135	KWMTBOMO00135	-0.726	1.091	-3.581	1.98e-02	0.094	-4.144	L5D6_OR_VS_L5D6_Ctr	noSig	LOC101745159
136	KWMTBOMO00136	0	0.023	0	1.00e+00	1	-7.814	L5D6_OR_VS_L5D6_Ctr	noSig	NA
137	KWMTBOMO00137	0.144	0.451	0.394	7.12e-01	1	-7.72	L5D6_OR_VS_L5D6_Ctr	noSig	NA
138	KWMTBOMO00138	0	0.071	0	1.00e+00	1	-7.814	L5D6_OR_VS_L5D6_Ctr	noSig	NA
139	KWMTBOMO00139	-0.088	1.303	-0.319	7.64e-01	1	-7.752	L5D6_OR_VS_L5D6_Ctr	noSig	NA
140	KWMTBOMO00140	0	0	0	1.00e+00	1	-7.814	L5D6_OR_VS_L5D6_Ctr	noSig	LOC101745445
141	KWMTBOMO00141	0.337	1.552	0.696	5.21e-01	0.84	-7.532	L5D6_OR_VS_L5D6_Ctr	noSig	LOC101738102
142	KWMTBOMO00142	0	0	0	1.00e+00	1	-7.814	L5D6_OR_VS_L5D6_Ctr	noSig	LOC101738234
143	KWMTBOMO00143	0	0	0	1.00e+00	1	-7.814	L5D6_OR_VS_L5D6_Ctr	noSig	NA
144	KWMTBOMO00144	-0.103	0.052	-1.048	3.49e-01	0.631	-7.213	L5D6_OR_VS_L5D6_Ctr	noSig	NA
145	KWMTBOMO00145	0	0.01	0	1.00e+00	1	-7.814	L5D6_OR_VS_L5D6_Ctr	noSig	LOC101738460
146	KWMTBOMO00146	0	0	0	1.00e+00	1	-7.814	L5D6_OR_VS_L5D6_Ctr	noSig	LOC101738591
147	KWMTBOMO00147	0.539	4.275	2.997	3.56e-02	0.145	-4.821	L5D6_OR_VS_L5D6_Ctr	noSig	LOC732866
148	KWMTBOMO00148	0.583	1.833	3.521	2.10e-02	0.0984	-4.211	L5D6_OR_VS_L5D6_Ctr	noSig	LOC101738820
149	KWMTBOMO00149	-0.468	0.234	-2.056	1.03e-01	0.31	-6	L5D6_OR_VS_L5D6_Ctr	noSig	NA
150	KWMTBOMO00150	-0.367	0.408	-2.213	8.53e-02	0.277	-5.799	L5D6_OR_VS_L5D6_Ctr	noSig	NA
151	KWMTBOMO00151	0.028	0.014	1.046	3.50e-01	0.631	-7.215	L5D6_OR_VS_L5D6_Ctr	noSig	LOC101739052
152	KWMTBOMO00152	-0.154	0.114	-1.572	1.85e-01	0.468	-6.612	L5D6_OR_VS_L5D6_Ctr	noSig	LOC101739198
153	KWMTBOMO00153	-0.954	2.211	-8.262	7.76e-04	0.0113	-0.316	L5D6_OR_VS_L5D6_Ctr	down	LOC101745741
154	KWMTBOMO00154	0.351	3.487	3.588	1.96e-02	0.0935	-4.136	L5D6_OR_VS_L5D6_Ctr	noSig	LOC101739335
155	KWMTBOMO00155	-0.211	0.789	-1.074	3.38e-01	0.631	-7.186	L5D6_OR_VS_L5D6_Ctr	noSig	LOC101745886
156	KWMTBOMO00156	0	0	0	1.00e+00	1	-7.814	L5D6_OR_VS_L5D6_Ctr	noSig	nwk
157	KWMTBOMO00157	-1.029	2.066	-6.785	1.75e-03	0.0182	-1.279	L5D6_OR_VS_L5D6_Ctr	down	LOC101746022
158	KWMTBOMO00158	-0.978	3.354	-5.401	4.34e-03	0.0328	-2.36	L5D6_OR_VS_L5D6_Ctr	down	LOC101746164
159	KWMTBOMO00159	0.28	0.14	1.638	1.70e-01	0.442	-6.531	L5D6_OR_VS_L5D6_Ctr	noSig	LOC733108
160	KWMTBOMO00160	-0.956	1.945	-5.028	5.73e-03	0.0397	-2.689	L5D6_OR_VS_L5D6_Ctr	down	LOC101746595
161	KWMTBOMO00161	-0.18	0.299	-2.272	7.96e-02	0.263	-5.723	L5D6_OR_VS_L5D6_Ctr	noSig	NA
162	KWMTBOMO00162	-0.069	0.053	-0.815	4.57e-01	0.763	-7.434	L5D6_OR_VS_L5D6_Ctr	noSig	NA
163	KWMTBOMO00163	0	0	0	1.00e+00	1	-7.814	L5D6_OR_VS_L5D6_Ctr	noSig	NA
164	KWMTBOMO00164	-0.348	0.202	-2.548	5.80e-02	0.209	-5.374	L5D6_OR_VS_L5D6_Ctr	noSig	NA
165	KWMTBOMO00165	0	0	0	1.00e+00	1	-7.814	L5D6_OR_VS_L5D6_Ctr	noSig	LOC101738352
166	KWMTBOMO00166	0	0	0	1.00e+00	1	-7.814	L5D6_OR_VS_L5D6_Ctr	noSig	LOC101738623
167	KWMTBOMO00167	-0.13	3.013	-1.194	2.93e-01	0.631	-7.057	L5D6_OR_VS_L5D6_Ctr	noSig	LOC101738756
168	KWMTBOMO00168	0.184	1.489	1.594	1.80e-01	0.459	-6.585	L5D6_OR_VS_L5D6_Ctr	noSig	DnaJ-18
169	KWMTBOMO00169	-0.157	1.82	-1.126	3.18e-01	0.631	-7.132	L5D6_OR_VS_L5D6_Ctr	noSig	LOC101741679
170	KWMTBOMO00170	0	0	0	1.00e+00	1	-7.814	L5D6_OR_VS_L5D6_Ctr	noSig	LOC101741586
171	KWMTBOMO00171	-0.014	0.016	-0.576	5.93e-01	0.921	-7.618	L5D6_OR_VS_L5D6_Ctr	noSig	LOC100174848
172	KWMTBOMO00172	0	0	0	1.00e+00	1	-7.814	L5D6_OR_VS_L5D6_Ctr	noSig	LOC110385829
173	KWMTBOMO00173	0	0	0	1.00e+00	1	-7.814	L5D6_OR_VS_L5D6_Ctr	noSig	NA
174	KWMTBOMO00174	-0.036	0.037	-0.647	5.50e-01	0.872	-7.568	L5D6_OR_VS_L5D6_Ctr	noSig	LOC101739187
175	KWMTBOMO00175	-0.05	0.025	-1.047	3.49e-01	0.631	-7.214	L5D6_OR_VS_L5D6_Ctr	noSig	NA
176	KWMTBOMO00176	-0.28	1.017	-0.865	4.32e-01	0.731	-7.39	L5D6_OR_VS_L5D6_Ctr	noSig	LOC101741973
177	KWMTBOMO00177	-0.129	0.654	-0.726	5.05e-01	0.82	-7.508	L5D6_OR_VS_L5D6_Ctr	noSig	LOC101742113
178	KWMTBOMO00178	-0.236	1.584	-1.022	3.60e-01	0.639	-7.24	L5D6_OR_VS_L5D6_Ctr	noSig	NA
179	KWMTBOMO00179	-0.277	1.374	-1.362	2.39e-01	0.561	-6.866	L5D6_OR_VS_L5D6_Ctr	noSig	PLCg
180	KWMTBOMO00180	0.457	3.076	2.737	4.70e-02	0.179	-5.137	L5D6_OR_VS_L5D6_Ctr	noSig	LOC101739325
181	KWMTBOMO00181	-0.456	3.463	-2.844	4.19e-02	0.164	-5.006	L5D6_OR_VS_L5D6_Ctr	noSig	LOC101742407
182	KWMTBOMO00182	0.001	0.245	0.009	9.93e-01	1	-7.814	L5D6_OR_VS_L5D6_Ctr	noSig	LOC101742896
183	KWMTBOMO00183	-0.117	0.105	-1.313	2.54e-01	0.587	-6.923	L5D6_OR_VS_L5D6_Ctr	noSig	NA
184	KWMTBOMO00184	-0.356	1.562	-2.492	6.18e-02	0.219	-5.443	L5D6_OR_VS_L5D6_Ctr	noSig	Fkbp13
185	KWMTBOMO00185	-0.11	0.055	-3.239	2.77e-02	0.121	-4.534	L5D6_OR_VS_L5D6_Ctr	noSig	NA
186	KWMTBOMO00186	-0.406	1.231	-1.999	1.10e-01	0.324	-6.074	L5D6_OR_VS_L5D6_Ctr	noSig	Hepa
187	KWMTBOMO00187	0.193	0.362	1.172	3.01e-01	0.631	-7.082	L5D6_OR_VS_L5D6_Ctr	noSig	Hig
188	KWMTBOMO00188	-0.967	1.155	-7.278	1.31e-03	0.0152	-0.939	L5D6_OR_VS_L5D6_Ctr	down	Cap-d3
189	KWMTBOMO00189	-0.283	0.384	-10.862	2.45e-04	0.00597	1.042	L5D6_OR_VS_L5D6_Ctr	noSig	Lap
190	KWMTBOMO00190	-0.192	0.809	-2.426	6.66e-02	0.232	-5.527	L5D6_OR_VS_L5D6_Ctr	noSig	Kettin
191	KWMTBOMO00191	-0.008	0.106	-0.183	8.63e-01	1	-7.793	L5D6_OR_VS_L5D6_Ctr	noSig	Titin2
192	KWMTBOMO00192	0.798	0.73	1.855	1.31e-01	0.366	-6.257	L5D6_OR_VS_L5D6_Ctr	noSig	Miple
193	KWMTBOMO00193	0	0	0	1.00e+00	1	-7.814	L5D6_OR_VS_L5D6_Ctr	noSig	NA
194	KWMTBOMO00194	0	0	0	1.00e+00	1	-7.814	L5D6_OR_VS_L5D6_Ctr	noSig	LOC101739467
195	KWMTBOMO00195	-0.353	2.551	-1.452	2.14e-01	0.518	-6.759	L5D6_OR_VS_L5D6_Ctr	noSig	Syx6
196	KWMTBOMO00196	-0.176	3.532	-0.881	4.24e-01	0.721	-7.376	L5D6_OR_VS_L5D6_Ctr	noSig	Pm-scl
197	KWMTBOMO00197	-0.189	3.947	-1.801	1.40e-01	0.383	-6.325	L5D6_OR_VS_L5D6_Ctr	noSig	NA
198	KWMTBOMO00198	-0.037	0.089	-0.36	7.35e-01	1	-7.735	L5D6_OR_VS_L5D6_Ctr	noSig	LOC101739607
199	KWMTBOMO00199	0.033	0.062	0.683	5.29e-01	0.848	-7.542	L5D6_OR_VS_L5D6_Ctr	noSig	Tkz
200	KWMTBOMO00200	-0.581	6.41	-5.326	4.58e-03	0.034	-2.424	L5D6_OR_VS_L5D6_Ctr	down	Ubcd4
201	KWMTBOMO00201	-0.1	6.01	-0.998	3.70e-01	0.649	-7.263	L5D6_OR_VS_L5D6_Ctr	noSig	LOC101743037
202	KWMTBOMO00202	0	0	0	1.00e+00	1	-7.814	L5D6_OR_VS_L5D6_Ctr	noSig	LOC101743368
203	KWMTBOMO00203	-0.602	3.069	-11.236	2.12e-04	0.00552	1.21	L5D6_OR_VS_L5D6_Ctr	down	LOC101743510
204	KWMTBOMO00204	-0.071	0.036	-1.047	3.49e-01	0.631	-7.214	L5D6_OR_VS_L5D6_Ctr	noSig	LOC101739748
205	KWMTBOMO00205	-1.436	2.382	-28.082	4.00e-06	0.00122	5.511	L5D6_OR_VS_L5D6_Ctr	down	LOC101739885
206	KWMTBOMO00206	-1.336	1.134	-3.788	1.63e-02	0.0818	-3.916	L5D6_OR_VS_L5D6_Ctr	noSig	NA
207	KWMTBOMO00207	-1.092	1.518	-2.894	3.97e-02	0.158	-4.945	L5D6_OR_VS_L5D6_Ctr	noSig	NA
208	KWMTBOMO00208	-0.385	0.715	-1.295	2.59e-01	0.596	-6.944	L5D6_OR_VS_L5D6_Ctr	noSig	LOC101743847
209	KWMTBOMO00209	-1.023	7.142	-10.394	2.95e-04	0.00661	0.823	L5D6_OR_VS_L5D6_Ctr	down	LOC101744139
210	KWMTBOMO00210	0.117	0.645	0.696	5.22e-01	0.84	-7.532	L5D6_OR_VS_L5D6_Ctr	noSig	DnaJ-17
211	KWMTBOMO00211	-0.486	0.706	-3.865	1.51e-02	0.0779	-3.833	L5D6_OR_VS_L5D6_Ctr	noSig	LOC101744420
212	KWMTBOMO00212	0	0	0	1.00e+00	1	-7.814	L5D6_OR_VS_L5D6_Ctr	noSig	LOC105842162
213	KWMTBOMO00213	-0.539	1.502	-3.348	2.48e-02	0.111	-4.407	L5D6_OR_VS_L5D6_Ctr	noSig	LOC101744713
214	KWMTBOMO00214	-0.104	0.149	-2.84	4.21e-02	0.165	-5.011	L5D6_OR_VS_L5D6_Ctr	noSig	LOC101744860
215	KWMTBOMO00215	0.024	0.053	0.47	6.61e-01	0.992	-7.682	L5D6_OR_VS_L5D6_Ctr	noSig	LOC101740018
216	KWMTBOMO00216	-0.297	0.334	-2.562	5.71e-02	0.206	-5.356	L5D6_OR_VS_L5D6_Ctr	noSig	LOC101740153
217	KWMTBOMO00217	-0.814	0.741	-2.591	5.53e-02	0.202	-5.319	L5D6_OR_VS_L5D6_Ctr	noSig	NA
218	KWMTBOMO00218	-0.404	0.415	-5.045	5.65e-03	0.0393	-2.673	L5D6_OR_VS_L5D6_Ctr	noSig	NA
219	KWMTBOMO00219	0.307	0.533	1.207	2.88e-01	0.631	-7.043	L5D6_OR_VS_L5D6_Ctr	noSig	LOC105842161
220	KWMTBOMO00220	-0.205	0.154	-1.108	3.25e-01	0.631	-7.151	L5D6_OR_VS_L5D6_Ctr	noSig	LOC101745000
221	KWMTBOMO00221	-0.103	0.052	-1.048	3.49e-01	0.631	-7.213	L5D6_OR_VS_L5D6_Ctr	noSig	LOC101740424
222	KWMTBOMO00222	0.165	2.488	1.645	1.69e-01	0.439	-6.523	L5D6_OR_VS_L5D6_Ctr	noSig	NA
223	KWMTBOMO00223	-0.25	2.989	-2.231	8.35e-02	0.273	-5.776	L5D6_OR_VS_L5D6_Ctr	noSig	Gk
224	KWMTBOMO00224	0.019	0.009	1.044	3.50e-01	0.631	-7.217	L5D6_OR_VS_L5D6_Ctr	noSig	Cyp305b1
225	KWMTBOMO00225	0.143	0.158	2.07	1.01e-01	0.306	-5.983	L5D6_OR_VS_L5D6_Ctr	noSig	NA
226	KWMTBOMO00226	0	0	0	1.00e+00	1	-7.814	L5D6_OR_VS_L5D6_Ctr	noSig	RDL2
227	KWMTBOMO00227	0	0	0	1.00e+00	1	-7.814	L5D6_OR_VS_L5D6_Ctr	noSig	LOC101745296
228	KWMTBOMO00228	0	0	0	1.00e+00	1	-7.814	L5D6_OR_VS_L5D6_Ctr	noSig	LOC101740691
229	KWMTBOMO00229	0	0	0	1.00e+00	1	-7.814	L5D6_OR_VS_L5D6_Ctr	noSig	LOC101740832
230	KWMTBOMO00230	0	0	0	1.00e+00	1	-7.814	L5D6_OR_VS_L5D6_Ctr	noSig	rdl1
231	KWMTBOMO00231	0	0	0	1.00e+00	1	-7.814	L5D6_OR_VS_L5D6_Ctr	noSig	LOC101740977
232	KWMTBOMO00232	0.051	0.054	1.763	1.46e-01	0.395	-6.374	L5D6_OR_VS_L5D6_Ctr	noSig	NA
233	KWMTBOMO00233	-0.196	0.173	-1.343	2.45e-01	0.571	-6.888	L5D6_OR_VS_L5D6_Ctr	noSig	NA
234	KWMTBOMO00234	-0.023	0.012	-1.046	3.50e-01	0.631	-7.216	L5D6_OR_VS_L5D6_Ctr	noSig	LOC101741118
235	KWMTBOMO00235	-0.601	0.735	-3.008	3.52e-02	0.144	-4.807	L5D6_OR_VS_L5D6_Ctr	noSig	LOC101745683
236	KWMTBOMO00236	-1.262	2.472	-11.697	1.78e-04	0.00512	1.41	L5D6_OR_VS_L5D6_Ctr	down	LOC101745832
237	KWMTBOMO00237	-0.204	4.338	-1.693	1.59e-01	0.421	-6.462	L5D6_OR_VS_L5D6_Ctr	noSig	LOC101746062
238	KWMTBOMO00238	0.879	3.395	4.91	6.27e-03	0.0421	-2.796	L5D6_OR_VS_L5D6_Ctr	up	Idgf
239	KWMTBOMO00239	0	0	0	1.00e+00	1	-7.814	L5D6_OR_VS_L5D6_Ctr	noSig	LOC101746302
240	KWMTBOMO00240	-0.047	0.08	-0.472	6.60e-01	0.991	-7.681	L5D6_OR_VS_L5D6_Ctr	noSig	LOC101741260
241	KWMTBOMO00241	0.259	0.394	1.563	1.87e-01	0.472	-6.623	L5D6_OR_VS_L5D6_Ctr	noSig	LOC101742576
242	KWMTBOMO00242	0.114	0.92	0.916	4.07e-01	0.7	-7.343	L5D6_OR_VS_L5D6_Ctr	noSig	LOC101746534
243	KWMTBOMO00243	0.05	0.025	1.047	3.49e-01	0.631	-7.214	L5D6_OR_VS_L5D6_Ctr	noSig	LOC101746670
244	KWMTBOMO00244	0.071	0.191	0.481	6.53e-01	0.984	-7.675	L5D6_OR_VS_L5D6_Ctr	noSig	Th
245	KWMTBOMO00245	0	0	0	1.00e+00	1	-7.814	L5D6_OR_VS_L5D6_Ctr	noSig	NA
246	KWMTBOMO00246	0.01	0.132	0.104	9.22e-01	1	-7.807	L5D6_OR_VS_L5D6_Ctr	noSig	BmMET2
247	KWMTBOMO00247	0.103	0.619	0.395	7.11e-01	1	-7.72	L5D6_OR_VS_L5D6_Ctr	noSig	LOC101746809
248	KWMTBOMO00248	1.278	0.639	7.329	1.27e-03	0.015	-0.904	L5D6_OR_VS_L5D6_Ctr	up	LOC100302628
249	KWMTBOMO00249	-0.378	0.599	-3.596	1.95e-02	0.0931	-4.127	L5D6_OR_VS_L5D6_Ctr	noSig	LOC101741399
250	KWMTBOMO00250	0	0	0	1.00e+00	1	-7.814	L5D6_OR_VS_L5D6_Ctr	noSig	LOC101746951
251	KWMTBOMO00251	0	0	0	1.00e+00	1	-7.814	L5D6_OR_VS_L5D6_Ctr	noSig	LOC105841711
252	KWMTBOMO00252	0	0	0	1.00e+00	1	-7.814	L5D6_OR_VS_L5D6_Ctr	noSig	LOC101741681
253	KWMTBOMO00253	0	0	0	1.00e+00	1	-7.814	L5D6_OR_VS_L5D6_Ctr	noSig	NA
254	KWMTBOMO00254	0.394	6.534	3.015	3.49e-02	0.143	-4.799	L5D6_OR_VS_L5D6_Ctr	noSig	Tpi
255	KWMTBOMO00255	0.046	0.894	0.17	8.72e-01	1	-7.796	L5D6_OR_VS_L5D6_Ctr	noSig	LOC101747083
256	KWMTBOMO00256	-0.271	2.714	-1.582	1.83e-01	0.464	-6.6	L5D6_OR_VS_L5D6_Ctr	noSig	LOC101747219
257	KWMTBOMO00257	0	0	0	1.00e+00	1	-7.814	L5D6_OR_VS_L5D6_Ctr	noSig	LOC101741824
258	KWMTBOMO00258	0.014	0.007	1.042	3.51e-01	0.631	-7.219	L5D6_OR_VS_L5D6_Ctr	noSig	LOC101735522
259	KWMTBOMO00259	0	0	0	1.00e+00	1	-7.814	L5D6_OR_VS_L5D6_Ctr	noSig	LOC101735659
260	KWMTBOMO00260	0	0	0	1.00e+00	1	-7.814	L5D6_OR_VS_L5D6_Ctr	noSig	NA
261	KWMTBOMO00261	0	0	0	1.00e+00	1	-7.814	L5D6_OR_VS_L5D6_Ctr	noSig	LOC101735933
262	KWMTBOMO00262	0	0	0	1.00e+00	1	-7.814	L5D6_OR_VS_L5D6_Ctr	noSig	NA
263	KWMTBOMO00263	0.404	0.202	1.923	1.21e-01	0.346	-6.171	L5D6_OR_VS_L5D6_Ctr	noSig	LOC105842174
264	KWMTBOMO00264	-0.09	0.19	-0.395	7.11e-01	1	-7.72	L5D6_OR_VS_L5D6_Ctr	noSig	LOC101736195
265	KWMTBOMO00265	-0.192	2.976	-0.812	4.59e-01	0.764	-7.437	L5D6_OR_VS_L5D6_Ctr	noSig	LOC692928
266	KWMTBOMO00266	0	0	0	1.00e+00	1	-7.814	L5D6_OR_VS_L5D6_Ctr	noSig	LOC101736368
267	KWMTBOMO00267	-0.383	1.959	-2.218	8.49e-02	0.276	-5.793	L5D6_OR_VS_L5D6_Ctr	noSig	LOC101736487
268	KWMTBOMO00268	0.183	0.27	0.731	5.02e-01	0.816	-7.505	L5D6_OR_VS_L5D6_Ctr	noSig	BmILP
269	KWMTBOMO00269	0.023	0.012	1.046	3.50e-01	0.631	-7.216	L5D6_OR_VS_L5D6_Ctr	noSig	LOC101736626
270	KWMTBOMO00270	1.515	3.054	5.445	4.20e-03	0.0322	-2.322	L5D6_OR_VS_L5D6_Ctr	up	LOC733047
271	KWMTBOMO00271	0.074	2.57	0.435	6.84e-01	1	-7.7	L5D6_OR_VS_L5D6_Ctr	noSig	LOC101736769
272	KWMTBOMO00272	-0.188	0.205	-2.535	5.89e-02	0.211	-5.39	L5D6_OR_VS_L5D6_Ctr	noSig	LOC101736897
273	KWMTBOMO00273	-0.421	0.771	-4.446	9.11e-03	0.0546	-3.237	L5D6_OR_VS_L5D6_Ctr	noSig	NA
274	KWMTBOMO00274	-0.385	0.872	-2.855	4.14e-02	0.163	-4.992	L5D6_OR_VS_L5D6_Ctr	noSig	LOC101737120
275	KWMTBOMO00275	-0.533	0.772	-3.688	1.79e-02	0.0876	-4.026	L5D6_OR_VS_L5D6_Ctr	noSig	LOC101741974
276	KWMTBOMO00276	-0.015	0.427	-0.056	9.58e-01	1	-7.812	L5D6_OR_VS_L5D6_Ctr	noSig	LOC101742114
277	KWMTBOMO00277	-0.564	1.643	-1.991	1.11e-01	0.327	-6.083	L5D6_OR_VS_L5D6_Ctr	noSig	LOC101737363
278	KWMTBOMO00278	-0.955	3.225	-11.189	2.16e-04	0.00554	1.19	L5D6_OR_VS_L5D6_Ctr	down	LOC101737505
279	KWMTBOMO00279	0.33	5.361	2.668	5.07e-02	0.19	-5.223	L5D6_OR_VS_L5D6_Ctr	noSig	LOC101737646
280	KWMTBOMO00280	-0.54	1.353	-4.163	1.16e-02	0.0649	-3.521	L5D6_OR_VS_L5D6_Ctr	noSig	LOC101737871
281	KWMTBOMO00281	-0.088	1.366	-0.468	6.62e-01	0.993	-7.683	L5D6_OR_VS_L5D6_Ctr	noSig	LOC101742555
282	KWMTBOMO00282	0	0	0	1.00e+00	1	-7.814	L5D6_OR_VS_L5D6_Ctr	noSig	LOC105842165
283	KWMTBOMO00283	0	0	0	1.00e+00	1	-7.814	L5D6_OR_VS_L5D6_Ctr	noSig	LOC101742700
284	KWMTBOMO00284	0	0	0	1.00e+00	1	-7.814	L5D6_OR_VS_L5D6_Ctr	noSig	NGR-B4
285	KWMTBOMO00285	0	0	0	1.00e+00	1	-7.814	L5D6_OR_VS_L5D6_Ctr	noSig	NA
286	KWMTBOMO00286	0	0	0	1.00e+00	1	-7.814	L5D6_OR_VS_L5D6_Ctr	noSig	NA
287	KWMTBOMO00287	0	0	0	1.00e+00	1	-7.814	L5D6_OR_VS_L5D6_Ctr	noSig	LOC101738006
288	KWMTBOMO00288	0	0	0	1.00e+00	1	-7.814	L5D6_OR_VS_L5D6_Ctr	noSig	NA
289	KWMTBOMO00289	-0.023	0.012	-1.046	3.50e-01	0.631	-7.216	L5D6_OR_VS_L5D6_Ctr	noSig	LOC101742848
290	KWMTBOMO00290	-0.641	2.759	-4.423	9.29e-03	0.0552	-3.26	L5D6_OR_VS_L5D6_Ctr	noSig	LOC101738134
291	KWMTBOMO00291	0.352	4.827	5.468	4.14e-03	0.0319	-2.303	L5D6_OR_VS_L5D6_Ctr	noSig	LOC692898
292	KWMTBOMO00292	0	0	0	1.00e+00	1	-7.814	L5D6_OR_VS_L5D6_Ctr	noSig	NA
293	KWMTBOMO00293	-0.553	3.206	-2.775	4.51e-02	0.174	-5.09	L5D6_OR_VS_L5D6_Ctr	noSig	LOC101738265
294	KWMTBOMO00294	-0.528	3.551	-3.332	2.52e-02	0.113	-4.426	L5D6_OR_VS_L5D6_Ctr	noSig	LOC101738622
295	KWMTBOMO00295	0	0	0	1.00e+00	1	-7.814	L5D6_OR_VS_L5D6_Ctr	noSig	LOC101738493
296	KWMTBOMO00296	0.1	0.1	1.747	1.49e-01	0.4	-6.394	L5D6_OR_VS_L5D6_Ctr	noSig	NA
297	KWMTBOMO00297	0.062	0.161	0.843	4.43e-01	0.745	-7.41	L5D6_OR_VS_L5D6_Ctr	noSig	NA
298	KWMTBOMO00298	0.056	0.028	1.824	1.36e-01	0.375	-6.296	L5D6_OR_VS_L5D6_Ctr	noSig	CPT1
299	KWMTBOMO00299	0.392	4.481	2.423	6.68e-02	0.232	-5.531	L5D6_OR_VS_L5D6_Ctr	noSig	LOC101742989
300	KWMTBOMO00300	-0.269	0.465	-0.792	4.69e-01	0.777	-7.455	L5D6_OR_VS_L5D6_Ctr	noSig	NA
301	KWMTBOMO00301	-0.514	3.902	-4.549	8.37e-03	0.0516	-3.137	L5D6_OR_VS_L5D6_Ctr	noSig	LOC101738899
302	KWMTBOMO00302	-0.014	4.023	-0.164	8.77e-01	1	-7.797	L5D6_OR_VS_L5D6_Ctr	noSig	LOC101739139
303	KWMTBOMO00303	-0.201	2.787	-1.547	1.91e-01	0.478	-6.644	L5D6_OR_VS_L5D6_Ctr	noSig	LOC101739551
304	KWMTBOMO00304	0	0	0	1.00e+00	1	-7.814	L5D6_OR_VS_L5D6_Ctr	noSig	NA
305	KWMTBOMO00305	-0.019	0.009	-1.044	3.50e-01	0.631	-7.217	L5D6_OR_VS_L5D6_Ctr	noSig	NA
306	KWMTBOMO00306	-0.067	0.034	-1.047	3.49e-01	0.631	-7.214	L5D6_OR_VS_L5D6_Ctr	noSig	LOC101743131
307	KWMTBOMO00307	0	0	0	1.00e+00	1	-7.814	L5D6_OR_VS_L5D6_Ctr	noSig	LOC101739695
308	KWMTBOMO00308	-0.222	0.369	-3.908	1.46e-02	0.0757	-3.788	L5D6_OR_VS_L5D6_Ctr	noSig	MSL1
309	KWMTBOMO00309	0.126	0.431	0.252	8.13e-01	1	-7.775	L5D6_OR_VS_L5D6_Ctr	noSig	NA
310	KWMTBOMO00310	0	0	0	1.00e+00	1	-7.814	L5D6_OR_VS_L5D6_Ctr	noSig	LOC101739837
311	KWMTBOMO00311	0.019	0.009	1.044	3.50e-01	0.631	-7.217	L5D6_OR_VS_L5D6_Ctr	noSig	LOC101740106
312	KWMTBOMO00312	0.014	0.007	1.042	3.51e-01	0.631	-7.219	L5D6_OR_VS_L5D6_Ctr	noSig	LOC101739975
313	KWMTBOMO00313	-0.088	0.044	-1.048	3.49e-01	0.631	-7.213	L5D6_OR_VS_L5D6_Ctr	noSig	LOC101740242
314	KWMTBOMO00314	-1.082	1.1	-9.201	4.94e-04	0.00876	0.217	L5D6_OR_VS_L5D6_Ctr	down	LOC101743416
315	KWMTBOMO00315	-0.141	3.537	-1.552	1.89e-01	0.476	-6.637	L5D6_OR_VS_L5D6_Ctr	noSig	LOC101740377
316	KWMTBOMO00316	0.05	0.025	1.047	3.49e-01	0.631	-7.214	L5D6_OR_VS_L5D6_Ctr	noSig	LOC101740601
317	KWMTBOMO00317	0	0	0	1.00e+00	1	-7.814	L5D6_OR_VS_L5D6_Ctr	noSig	LOC101740738
318	KWMTBOMO00318	0	0	0	1.00e+00	1	-7.814	L5D6_OR_VS_L5D6_Ctr	noSig	LOC101740877
319	KWMTBOMO00319	0.005	0.002	1	3.69e-01	0.649	-7.262	L5D6_OR_VS_L5D6_Ctr	noSig	LOC101743556
320	KWMTBOMO00320	0.084	0.042	1.048	3.49e-01	0.631	-7.213	L5D6_OR_VS_L5D6_Ctr	noSig	NA
321	KWMTBOMO00321	0.063	0.032	1.047	3.49e-01	0.631	-7.214	L5D6_OR_VS_L5D6_Ctr	noSig	LOC101741018
322	KWMTBOMO00322	0	0	0	1.00e+00	1	-7.814	L5D6_OR_VS_L5D6_Ctr	noSig	NA
323	KWMTBOMO00323	0.005	0.002	1	3.69e-01	0.649	-7.262	L5D6_OR_VS_L5D6_Ctr	noSig	LOC101743697
324	KWMTBOMO00324	-0.464	2.032	-1.552	1.89e-01	0.476	-6.637	L5D6_OR_VS_L5D6_Ctr	noSig	NA
325	KWMTBOMO00325	-0.363	1.944	-2.244	8.22e-02	0.27	-5.759	L5D6_OR_VS_L5D6_Ctr	noSig	LOC101741166
326	KWMTBOMO00326	-0.606	2.348	-2.346	7.30e-02	0.248	-5.629	L5D6_OR_VS_L5D6_Ctr	noSig	LOC101743848
327	KWMTBOMO00327	-0.828	1.134	-7.008	1.53e-03	0.0167	-1.122	L5D6_OR_VS_L5D6_Ctr	down	LOC101743995
328	KWMTBOMO00328	0.082	0.185	0.867	4.31e-01	0.73	-7.388	L5D6_OR_VS_L5D6_Ctr	noSig	LOC101741539
329	KWMTBOMO00329	0.739	0.37	11.276	2.09e-04	0.00549	1.228	L5D6_OR_VS_L5D6_Ctr	up	LOC101744140
330	KWMTBOMO00330	0	0	0	1.00e+00	1	-7.814	L5D6_OR_VS_L5D6_Ctr	noSig	LOC101744279
331	KWMTBOMO00331	-0.034	0.436	-0.244	8.18e-01	1	-7.778	L5D6_OR_VS_L5D6_Ctr	noSig	LOC101744421
332	KWMTBOMO00332	-0.787	1.399	-4.686	7.49e-03	0.0477	-3.005	L5D6_OR_VS_L5D6_Ctr	down	Nep-L
333	KWMTBOMO00333	-0.537	0.904	-4.459	9.02e-03	0.0542	-3.225	L5D6_OR_VS_L5D6_Ctr	noSig	NA
334	KWMTBOMO00334	-1.08	2.43	-5.781	3.32e-03	0.0278	-2.043	L5D6_OR_VS_L5D6_Ctr	down	LOC101741823
335	KWMTBOMO00335	0	0	0	1.00e+00	1	-7.814	L5D6_OR_VS_L5D6_Ctr	noSig	LOC101742068
336	KWMTBOMO00336	-1.584	4.27	-17.054	3.52e-05	0.00247	3.258	L5D6_OR_VS_L5D6_Ctr	down	LOC101742358
337	KWMTBOMO00337	-0.69	2.33	-2.036	1.05e-01	0.314	-6.025	L5D6_OR_VS_L5D6_Ctr	noSig	NA
338	KWMTBOMO00338	0.092	3.053	0.592	5.83e-01	0.91	-7.607	L5D6_OR_VS_L5D6_Ctr	noSig	LOC101744714
339	KWMTBOMO00339	0.908	9.415	10.378	2.97e-04	0.00661	0.815	L5D6_OR_VS_L5D6_Ctr	up	Ybp
340	KWMTBOMO00340	0.719	5.297	8.494	6.91e-04	0.0105	-0.179	L5D6_OR_VS_L5D6_Ctr	up	Cat
341	KWMTBOMO00341	0	0	0	1.00e+00	1	-7.814	L5D6_OR_VS_L5D6_Ctr	noSig	LOC101742649
342	KWMTBOMO00342	0.514	0.328	3.219	2.83e-02	0.122	-4.557	L5D6_OR_VS_L5D6_Ctr	noSig	be2
343	KWMTBOMO00343	0.023	0.012	1.046	3.50e-01	0.631	-7.216	L5D6_OR_VS_L5D6_Ctr	noSig	LOC101740035
344	KWMTBOMO00344	0.033	0.016	1.047	3.49e-01	0.631	-7.214	L5D6_OR_VS_L5D6_Ctr	noSig	LOC101745147
345	KWMTBOMO00345	0.221	2.727	0.698	5.20e-01	0.838	-7.53	L5D6_OR_VS_L5D6_Ctr	noSig	LOC101743038
346	KWMTBOMO00346	0	0	0	1.00e+00	1	-7.814	L5D6_OR_VS_L5D6_Ctr	noSig	LOC101742897
347	KWMTBOMO00347	0.154	3.462	1.574	1.84e-01	0.467	-6.611	L5D6_OR_VS_L5D6_Ctr	noSig	NA
348	KWMTBOMO00348	0.054	0.027	1.047	3.49e-01	0.631	-7.214	L5D6_OR_VS_L5D6_Ctr	noSig	LOC101743186
349	KWMTBOMO00349	0	0	0	1.00e+00	1	-7.814	L5D6_OR_VS_L5D6_Ctr	noSig	LOC101745297
350	KWMTBOMO00350	0.067	0.034	1.047	3.49e-01	0.631	-7.214	L5D6_OR_VS_L5D6_Ctr	noSig	LOC101743415
351	KWMTBOMO00351	0	0	0	1.00e+00	1	-7.814	L5D6_OR_VS_L5D6_Ctr	noSig	NA
352	KWMTBOMO00352	0.026	2.559	0.189	8.58e-01	1	-7.792	L5D6_OR_VS_L5D6_Ctr	noSig	LOC101743555
353	KWMTBOMO00353	-0.422	0.429	-4.365	9.76e-03	0.0574	-3.318	L5D6_OR_VS_L5D6_Ctr	noSig	LOC101745437
354	KWMTBOMO00354	0.028	0.014	1.046	3.50e-01	0.631	-7.215	L5D6_OR_VS_L5D6_Ctr	noSig	CPT2
355	KWMTBOMO00355	-0.115	0.076	-1.654	1.67e-01	0.436	-6.51	L5D6_OR_VS_L5D6_Ctr	noSig	NA
356	KWMTBOMO00356	-0.307	0.37	-2.919	3.86e-02	0.155	-4.914	L5D6_OR_VS_L5D6_Ctr	noSig	NA
357	KWMTBOMO00357	0	0	0	1.00e+00	1	-7.814	L5D6_OR_VS_L5D6_Ctr	noSig	LOC101740860
358	KWMTBOMO00358	-1.243	2.136	-5.001	5.84e-03	0.0402	-2.712	L5D6_OR_VS_L5D6_Ctr	down	LOC101744185
359	KWMTBOMO00359	-0.093	0.313	-0.302	7.76e-01	1	-7.758	L5D6_OR_VS_L5D6_Ctr	noSig	NA
360	KWMTBOMO00360	-0.277	0.139	-1.048	3.49e-01	0.631	-7.213	L5D6_OR_VS_L5D6_Ctr	noSig	NA
361	KWMTBOMO00361	0.304	0.694	0.857	4.36e-01	0.737	-7.398	L5D6_OR_VS_L5D6_Ctr	noSig	LOC101743792
362	KWMTBOMO00362	-0.439	4.055	-7.085	1.46e-03	0.0161	-1.069	L5D6_OR_VS_L5D6_Ctr	noSig	LOC101744330
363	KWMTBOMO00363	-0.199	0.485	-1.732	1.52e-01	0.406	-6.413	L5D6_OR_VS_L5D6_Ctr	noSig	LOC101745877
364	KWMTBOMO00364	-0.28	0.604	-2.397	6.89e-02	0.238	-5.564	L5D6_OR_VS_L5D6_Ctr	noSig	LOC101746015
365	KWMTBOMO00365	0.076	0.038	1.048	3.49e-01	0.631	-7.214	L5D6_OR_VS_L5D6_Ctr	noSig	LOC101744665
366	KWMTBOMO00366	-0.067	0.508	-0.439	6.81e-01	1	-7.698	L5D6_OR_VS_L5D6_Ctr	noSig	LOC101745047
367	KWMTBOMO00367	0	0	0	1.00e+00	1	-7.814	L5D6_OR_VS_L5D6_Ctr	noSig	NA
368	KWMTBOMO00368	0.039	0.958	0.158	8.81e-01	1	-7.798	L5D6_OR_VS_L5D6_Ctr	noSig	LOC101746155
369	KWMTBOMO00369	0	0	0	1.00e+00	1	-7.814	L5D6_OR_VS_L5D6_Ctr	noSig	LOC101745488
370	KWMTBOMO00370	0	0	0	1.00e+00	1	-7.814	L5D6_OR_VS_L5D6_Ctr	noSig	LOC101745729
371	KWMTBOMO00371	0	0	0	1.00e+00	1	-7.814	L5D6_OR_VS_L5D6_Ctr	noSig	NA
372	KWMTBOMO00372	0	0	0	1.00e+00	1	-7.814	L5D6_OR_VS_L5D6_Ctr	noSig	LOC101745876
373	KWMTBOMO00373	-1.31	4.441	-9.498	4.32e-04	0.0082	0.374	L5D6_OR_VS_L5D6_Ctr	down	LOC101746014
374	KWMTBOMO00374	-0.378	0.686	-2.451	6.48e-02	0.227	-5.496	L5D6_OR_VS_L5D6_Ctr	noSig	LOC101746723
375	KWMTBOMO00375	-0.053	5.023	-1.101	3.28e-01	0.631	-7.158	L5D6_OR_VS_L5D6_Ctr	noSig	LOC101746258
376	KWMTBOMO00376	0	0	0	1.00e+00	1	-7.814	L5D6_OR_VS_L5D6_Ctr	noSig	NA
377	KWMTBOMO00377	0	0	0	1.00e+00	1	-7.814	L5D6_OR_VS_L5D6_Ctr	noSig	NA
378	KWMTBOMO00378	-0.569	1.636	-6.839	1.69e-03	0.0178	-1.24	L5D6_OR_VS_L5D6_Ctr	down	NA
379	KWMTBOMO00379	-1.634	1.11	-17.644	3.03e-05	0.00237	3.42	L5D6_OR_VS_L5D6_Ctr	down	Ftz-f1
380	KWMTBOMO00380	0.572	3.971	3.213	2.84e-02	0.123	-4.564	L5D6_OR_VS_L5D6_Ctr	noSig	LOC732961
381	KWMTBOMO00381	0	0	0	1.00e+00	1	-7.814	L5D6_OR_VS_L5D6_Ctr	noSig	LOC101746998
382	KWMTBOMO00382	-1.174	0.766	-12.861	1.19e-04	0.00424	1.881	L5D6_OR_VS_L5D6_Ctr	down	PH
383	KWMTBOMO00383	-0.137	0.069	-1.048	3.49e-01	0.631	-7.213	L5D6_OR_VS_L5D6_Ctr	noSig	NA
384	KWMTBOMO00384	0	0	0	1.00e+00	1	-7.814	L5D6_OR_VS_L5D6_Ctr	noSig	NA
385	KWMTBOMO00385	0	0	0	1.00e+00	1	-7.814	L5D6_OR_VS_L5D6_Ctr	noSig	NA
386	KWMTBOMO00386	-0.074	0.037	-1.773	1.44e-01	0.391	-6.361	L5D6_OR_VS_L5D6_Ctr	noSig	LOC101747134
387	KWMTBOMO00387	-0.221	1.244	-0.611	5.71e-01	0.897	-7.594	L5D6_OR_VS_L5D6_Ctr	noSig	LOC101741189
388	KWMTBOMO00388	0.208	0.799	4.278	1.05e-02	0.0605	-3.405	L5D6_OR_VS_L5D6_Ctr	noSig	LOC101735340
389	KWMTBOMO00389	-0.632	0.415	-9.009	5.40e-04	0.00922	0.112	L5D6_OR_VS_L5D6_Ctr	down	LOC101746722
390	KWMTBOMO00390	-0.252	6.127	-1.653	1.67e-01	0.436	-6.512	L5D6_OR_VS_L5D6_Ctr	noSig	LOC101746861
391	KWMTBOMO00391	0.468	1.306	4.727	7.24e-03	0.0466	-2.966	L5D6_OR_VS_L5D6_Ctr	noSig	LOC110385812
392	KWMTBOMO00392	-0.788	4.184	-5.979	2.91e-03	0.0253	-1.884	L5D6_OR_VS_L5D6_Ctr	down	LOC101747133
393	KWMTBOMO00393	-0.329	1.403	-2.396	6.89e-02	0.238	-5.565	L5D6_OR_VS_L5D6_Ctr	noSig	LOC101746997
394	KWMTBOMO00394	0	0	0	1.00e+00	1	-7.814	L5D6_OR_VS_L5D6_Ctr	noSig	LOC101735479
395	KWMTBOMO00395	0	0	0	1.00e+00	1	-7.814	L5D6_OR_VS_L5D6_Ctr	noSig	LOC105842151
396	KWMTBOMO00396	0.033	0.017	2.028	1.06e-01	0.316	-6.036	L5D6_OR_VS_L5D6_Ctr	noSig	LOC101735430
397	KWMTBOMO00397	-0.67	0.683	-4.231	1.09e-02	0.0624	-3.452	L5D6_OR_VS_L5D6_Ctr	noSig	LOC101735703
398	KWMTBOMO00398	-0.135	2.652	-0.563	6.01e-01	0.929	-7.626	L5D6_OR_VS_L5D6_Ctr	noSig	LOC101735840
399	KWMTBOMO00399	-0.423	1.9	-1.688	1.60e-01	0.424	-6.469	L5D6_OR_VS_L5D6_Ctr	noSig	NA
400	KWMTBOMO00400	-0.048	0.115	-0.451	6.73e-01	1	-7.692	L5D6_OR_VS_L5D6_Ctr	noSig	LOC101735755
401	KWMTBOMO00401	-0.23	2.222	-0.871	4.29e-01	0.727	-7.384	L5D6_OR_VS_L5D6_Ctr	noSig	LOC101735887
402	KWMTBOMO00402	0.041	0.021	1.047	3.49e-01	0.631	-7.214	L5D6_OR_VS_L5D6_Ctr	noSig	LOC101736015
403	KWMTBOMO00403	-0.053	4.541	-0.266	8.02e-01	1	-7.771	L5D6_OR_VS_L5D6_Ctr	noSig	LOC101736151
404	KWMTBOMO00404	0	0	0	1.00e+00	1	-7.814	L5D6_OR_VS_L5D6_Ctr	noSig	LOC101736287
405	KWMTBOMO00405	0	0	0	1.00e+00	1	-7.814	L5D6_OR_VS_L5D6_Ctr	noSig	Or-1
406	KWMTBOMO00406	-0.735	0.625	-5.893	3.08e-03	0.0264	-1.953	L5D6_OR_VS_L5D6_Ctr	down	LOC101736103
407	KWMTBOMO00407	-0.58	1.201	-5.528	3.96e-03	0.0311	-2.252	L5D6_OR_VS_L5D6_Ctr	down	LOC101736416
408	KWMTBOMO00408	-0.542	1.702	-2.942	3.77e-02	0.152	-4.887	L5D6_OR_VS_L5D6_Ctr	noSig	LOC101736542
409	KWMTBOMO00409	0.046	0.023	1.047	3.49e-01	0.631	-7.214	L5D6_OR_VS_L5D6_Ctr	noSig	LOC101736369
410	KWMTBOMO00410	0	0	0	1.00e+00	1	-7.814	L5D6_OR_VS_L5D6_Ctr	noSig	LOC101736488
411	KWMTBOMO00411	-0.502	0.819	-3.482	2.18e-02	0.101	-4.255	L5D6_OR_VS_L5D6_Ctr	noSig	LOC101736677
412	KWMTBOMO00412	0	0	0	1.00e+00	1	-7.814	L5D6_OR_VS_L5D6_Ctr	noSig	LOC101736942
413	KWMTBOMO00413	0	0	0	1.00e+00	1	-7.814	L5D6_OR_VS_L5D6_Ctr	noSig	NA
414	KWMTBOMO00414	0	0	0	1.00e+00	1	-7.814	L5D6_OR_VS_L5D6_Ctr	noSig	NA
415	KWMTBOMO00415	0	0	0	1.00e+00	1	-7.814	L5D6_OR_VS_L5D6_Ctr	noSig	LOC101736770
416	KWMTBOMO00416	-0.183	0.092	-2.095	9.80e-02	0.304	-5.95	L5D6_OR_VS_L5D6_Ctr	noSig	NA
417	KWMTBOMO00417	-0.012	0.105	-0.097	9.27e-01	1	-7.808	L5D6_OR_VS_L5D6_Ctr	noSig	LOC101736898
418	KWMTBOMO00418	0	0	0	1.00e+00	1	-7.814	L5D6_OR_VS_L5D6_Ctr	noSig	NA
419	KWMTBOMO00419	0	0	0	1.00e+00	1	-7.814	L5D6_OR_VS_L5D6_Ctr	noSig	NA
420	KWMTBOMO00420	-0.151	0.099	-3.549	2.04e-02	0.0962	-4.179	L5D6_OR_VS_L5D6_Ctr	noSig	LOC110385027
421	KWMTBOMO00421	0	0	0	1.00e+00	1	-7.814	L5D6_OR_VS_L5D6_Ctr	noSig	LOC101737027
422	KWMTBOMO00422	0.033	0.016	1.047	3.49e-01	0.631	-7.214	L5D6_OR_VS_L5D6_Ctr	noSig	Fln
423	KWMTBOMO00423	-0.06	0.049	-2.565	5.69e-02	0.206	-5.352	L5D6_OR_VS_L5D6_Ctr	noSig	NA
424	KWMTBOMO00424	-0.198	0.099	-1.048	3.49e-01	0.631	-7.213	L5D6_OR_VS_L5D6_Ctr	noSig	LOC110385851
425	KWMTBOMO00425	-1.193	3.088	-4.684	7.50e-03	0.0477	-3.007	L5D6_OR_VS_L5D6_Ctr	down	LOC101737163
426	KWMTBOMO00426	-2.687	2.287	-20.891	1.46e-05	0.00196	4.212	L5D6_OR_VS_L5D6_Ctr	down	Per
427	KWMTBOMO00427	-1.005	4.175	-9.172	5.01e-04	0.00879	0.201	L5D6_OR_VS_L5D6_Ctr	down	Copg1
428	KWMTBOMO00428	0.071	0.09	0.885	4.22e-01	0.719	-7.372	L5D6_OR_VS_L5D6_Ctr	noSig	LOC101737214
429	KWMTBOMO00429	0	0	0	1.00e+00	1	-7.814	L5D6_OR_VS_L5D6_Ctr	noSig	NA
430	KWMTBOMO00430	0	0	0	1.00e+00	1	-7.814	L5D6_OR_VS_L5D6_Ctr	noSig	NA
431	KWMTBOMO00431	0	0	0	1.00e+00	1	-7.814	L5D6_OR_VS_L5D6_Ctr	noSig	NA
432	KWMTBOMO00432	-0.019	0.014	-0.816	4.57e-01	0.762	-7.434	L5D6_OR_VS_L5D6_Ctr	noSig	NA
433	KWMTBOMO00433	-0.116	0.171	-0.925	4.03e-01	0.695	-7.335	L5D6_OR_VS_L5D6_Ctr	noSig	NA
434	KWMTBOMO00434	-0.252	0.201	-3.89	1.48e-02	0.0766	-3.807	L5D6_OR_VS_L5D6_Ctr	noSig	NA
435	KWMTBOMO00435	-0.672	4.146	-4.756	7.08e-03	0.0458	-2.939	L5D6_OR_VS_L5D6_Ctr	down	LOC101737506
436	KWMTBOMO00436	0.014	0.007	1.042	3.51e-01	0.631	-7.219	L5D6_OR_VS_L5D6_Ctr	noSig	NA
437	KWMTBOMO00437	0.532	1.784	2.606	5.44e-02	0.199	-5.301	L5D6_OR_VS_L5D6_Ctr	noSig	LOC101737828
438	KWMTBOMO00438	-1.38	2.303	-13.469	9.75e-05	0.00379	2.108	L5D6_OR_VS_L5D6_Ctr	down	LOC101737959
439	KWMTBOMO00439	-0.906	2.786	-7.992	8.91e-04	0.0121	-0.48	L5D6_OR_VS_L5D6_Ctr	down	LOC101737920
440	KWMTBOMO00440	-0.006	0.068	-0.084	9.37e-01	1	-7.809	L5D6_OR_VS_L5D6_Ctr	noSig	NA
441	KWMTBOMO00441	0	0	0	1.00e+00	1	-7.814	L5D6_OR_VS_L5D6_Ctr	noSig	NA
442	KWMTBOMO00442	0	0	0	1.00e+00	1	-7.814	L5D6_OR_VS_L5D6_Ctr	noSig	LOC101738221
443	KWMTBOMO00443	0.118	0.059	1.269	2.67e-01	0.61	-6.973	L5D6_OR_VS_L5D6_Ctr	noSig	LOC101738052
444	KWMTBOMO00444	-0.177	0.67	-2.286	7.84e-02	0.26	-5.706	L5D6_OR_VS_L5D6_Ctr	noSig	LOC101738179
445	KWMTBOMO00445	-0.418	0.34	-6.333	2.31e-03	0.0216	-1.611	L5D6_OR_VS_L5D6_Ctr	noSig	NA
446	KWMTBOMO00446	-0.144	0.072	-1.601	1.78e-01	0.457	-6.576	L5D6_OR_VS_L5D6_Ctr	noSig	NA
447	KWMTBOMO00447	0	0	0	1.00e+00	1	-7.814	L5D6_OR_VS_L5D6_Ctr	noSig	LOC101738304
448	KWMTBOMO00448	-1.023	0.598	-6.189	2.53e-03	0.0231	-1.72	L5D6_OR_VS_L5D6_Ctr	down	NA
449	KWMTBOMO00449	0	0	0	1.00e+00	1	-7.814	L5D6_OR_VS_L5D6_Ctr	noSig	LOC105841794
450	KWMTBOMO00450	0.134	0.067	1.048	3.49e-01	0.631	-7.213	L5D6_OR_VS_L5D6_Ctr	noSig	LOC105842723
451	KWMTBOMO00451	-0.851	0.999	-2.909	3.91e-02	0.156	-4.927	L5D6_OR_VS_L5D6_Ctr	noSig	LOC105842806
452	KWMTBOMO00452	-0.103	0.052	-1.048	3.49e-01	0.631	-7.213	L5D6_OR_VS_L5D6_Ctr	noSig	LOC110386941
453	KWMTBOMO00453	-0.076	0.038	-1.048	3.49e-01	0.631	-7.214	L5D6_OR_VS_L5D6_Ctr	noSig	NA
454	KWMTBOMO00454	0.014	0.007	1.042	3.51e-01	0.631	-7.219	L5D6_OR_VS_L5D6_Ctr	noSig	LOC101738169
455	KWMTBOMO00455	-0.375	0.794	-6.822	1.71e-03	0.0179	-1.253	L5D6_OR_VS_L5D6_Ctr	noSig	NA
456	KWMTBOMO00456	-0.105	0.08	-1.244	2.76e-01	0.623	-7.001	L5D6_OR_VS_L5D6_Ctr	noSig	NA
457	KWMTBOMO00457	-0.074	0.078	-0.836	4.46e-01	0.75	-7.416	L5D6_OR_VS_L5D6_Ctr	noSig	LOC101737254
458	KWMTBOMO00458	-0.238	0.119	-1.048	3.49e-01	0.631	-7.213	L5D6_OR_VS_L5D6_Ctr	noSig	croc
459	KWMTBOMO00459	-0.031	1.564	-0.144	8.92e-01	1	-7.801	L5D6_OR_VS_L5D6_Ctr	noSig	LOC105841766
460	KWMTBOMO00460	-0.513	1.626	-5.679	3.56e-03	0.0289	-2.126	L5D6_OR_VS_L5D6_Ctr	down	LOC101737109
461	KWMTBOMO00461	0.075	1.04	0.271	7.99e-01	1	-7.769	L5D6_OR_VS_L5D6_Ctr	noSig	LOC732911
462	KWMTBOMO00462	0.325	3.829	1.648	1.68e-01	0.438	-6.518	L5D6_OR_VS_L5D6_Ctr	noSig	Tudor-SN
463	KWMTBOMO00463	-0.08	0.04	-1.048	3.49e-01	0.631	-7.213	L5D6_OR_VS_L5D6_Ctr	noSig	LOC101736715
464	KWMTBOMO00464	-0.148	0.871	-0.966	3.84e-01	0.669	-7.295	L5D6_OR_VS_L5D6_Ctr	noSig	LOC101736230
465	KWMTBOMO00465	-0.868	1.297	-4.917	6.24e-03	0.0419	-2.79	L5D6_OR_VS_L5D6_Ctr	down	LOC101736095
466	KWMTBOMO00466	0	0	0	1.00e+00	1	-7.814	L5D6_OR_VS_L5D6_Ctr	noSig	LOC101735879
467	KWMTBOMO00467	0	0	0	1.00e+00	1	-7.814	L5D6_OR_VS_L5D6_Ctr	noSig	LOC101737634
468	KWMTBOMO00468	-0.226	0.113	-1.048	3.49e-01	0.631	-7.213	L5D6_OR_VS_L5D6_Ctr	noSig	LOC101745339
469	KWMTBOMO00469	-0.412	0.441	-2.574	5.64e-02	0.205	-5.341	L5D6_OR_VS_L5D6_Ctr	noSig	LOC105841861
470	KWMTBOMO00470	-0.047	0.047	-2.618	5.37e-02	0.198	-5.286	L5D6_OR_VS_L5D6_Ctr	noSig	NA
471	KWMTBOMO00471	-0.533	0.56	-0.855	4.37e-01	0.738	-7.399	L5D6_OR_VS_L5D6_Ctr	noSig	NA
472	KWMTBOMO00472	-0.727	0.576	-8.877	5.75e-04	0.00945	0.039	L5D6_OR_VS_L5D6_Ctr	down	LOC101739761
473	KWMTBOMO00473	-0.514	3.656	-5.272	4.77e-03	0.0349	-2.472	L5D6_OR_VS_L5D6_Ctr	down	LOC733113
474	KWMTBOMO00474	-0.477	0.889	-2.395	6.91e-02	0.238	-5.567	L5D6_OR_VS_L5D6_Ctr	noSig	LOC101739895
475	KWMTBOMO00475	0	0	0	1.00e+00	1	-7.814	L5D6_OR_VS_L5D6_Ctr	noSig	NA
476	KWMTBOMO00476	0.008	0.315	0.099	9.26e-01	1	-7.808	L5D6_OR_VS_L5D6_Ctr	noSig	LOC101740160
477	KWMTBOMO00477	0.047	0.023	1.731	1.52e-01	0.406	-6.414	L5D6_OR_VS_L5D6_Ctr	noSig	NA
478	KWMTBOMO00478	-0.063	0.032	-1.047	3.49e-01	0.631	-7.214	L5D6_OR_VS_L5D6_Ctr	noSig	LOC101742079
479	KWMTBOMO00479	-0.317	0.158	-2.089	9.87e-02	0.304	-5.957	L5D6_OR_VS_L5D6_Ctr	noSig	LOC101740302
480	KWMTBOMO00480	0.067	0.034	1.047	3.49e-01	0.631	-7.214	L5D6_OR_VS_L5D6_Ctr	noSig	NA
481	KWMTBOMO00481	0	0	0	1.00e+00	1	-7.814	L5D6_OR_VS_L5D6_Ctr	noSig	NA
482	KWMTBOMO00482	-1.479	3.245	-58.289	1.63e-07	0.000394	7.946	L5D6_OR_VS_L5D6_Ctr	down	LOC110386707
483	KWMTBOMO00483	0	0	0	1.00e+00	1	-7.814	L5D6_OR_VS_L5D6_Ctr	noSig	NA
484	KWMTBOMO00484	0	0	0	1.00e+00	1	-7.814	L5D6_OR_VS_L5D6_Ctr	noSig	NA
485	KWMTBOMO00485	0	0	0	1.00e+00	1	-7.814	L5D6_OR_VS_L5D6_Ctr	noSig	LOC101742470
486	KWMTBOMO00486	-0.561	5.566	-10.466	2.87e-04	0.00648	0.857	L5D6_OR_VS_L5D6_Ctr	down	LOC101742319
487	KWMTBOMO00487	0.168	4.867	1.26	2.70e-01	0.615	-6.983	L5D6_OR_VS_L5D6_Ctr	noSig	LOC692792
488	KWMTBOMO00488	0	0	0	1.00e+00	1	-7.814	L5D6_OR_VS_L5D6_Ctr	noSig	Bbx-e1
489	KWMTBOMO00489	0	0	0	1.00e+00	1	-7.814	L5D6_OR_VS_L5D6_Ctr	noSig	LOC110386425
490	KWMTBOMO00490	0.005	0.031	0.15	8.88e-01	1	-7.8	L5D6_OR_VS_L5D6_Ctr	noSig	LOC101742858
491	KWMTBOMO00491	-0.836	2.792	-6.236	2.46e-03	0.0226	-1.684	L5D6_OR_VS_L5D6_Ctr	down	LOC101742611
492	KWMTBOMO00492	-0.673	1.993	-3.959	1.39e-02	0.0733	-3.734	L5D6_OR_VS_L5D6_Ctr	noSig	LOC101737612
493	KWMTBOMO00493	0	0	0	1.00e+00	1	-7.814	L5D6_OR_VS_L5D6_Ctr	noSig	LOC101740847
494	KWMTBOMO00494	0.882	3.58	6.084	2.71e-03	0.0242	-1.802	L5D6_OR_VS_L5D6_Ctr	up	LOC101740991
495	KWMTBOMO00495	-0.379	2.431	-3.594	1.95e-02	0.0931	-4.129	L5D6_OR_VS_L5D6_Ctr	noSig	LOC101740431
496	KWMTBOMO00496	-0.245	0.456	-1.351	2.42e-01	0.567	-6.879	L5D6_OR_VS_L5D6_Ctr	noSig	LOC101743000
497	KWMTBOMO00497	0.383	6.342	2.851	4.16e-02	0.163	-4.998	L5D6_OR_VS_L5D6_Ctr	noSig	LOC101743755
498	KWMTBOMO00498	0.319	0.247	3.416	2.32e-02	0.106	-4.33	L5D6_OR_VS_L5D6_Ctr	noSig	LOC101743521
499	KWMTBOMO00499	-0.413	3.84	-9.538	4.25e-04	0.00808	0.395	L5D6_OR_VS_L5D6_Ctr	noSig	LOC105842703
500	KWMTBOMO00500	-0.604	1.043	-4.37	9.72e-03	0.0572	-3.312	L5D6_OR_VS_L5D6_Ctr	noSig	Snf4agamma
501	KWMTBOMO00501	-1.397	3.884	-9.777	3.83e-04	0.0076	0.518	L5D6_OR_VS_L5D6_Ctr	down	NA
502	KWMTBOMO00502	-1.173	0.988	-5.33	4.57e-03	0.034	-2.421	L5D6_OR_VS_L5D6_Ctr	down	LOC101744006
503	KWMTBOMO00503	-0.678	0.414	-9.242	4.85e-04	0.0087	0.239	L5D6_OR_VS_L5D6_Ctr	down	LOC101740699
504	KWMTBOMO00504	0	0	0	1.00e+00	1	-7.814	L5D6_OR_VS_L5D6_Ctr	noSig	NA
505	KWMTBOMO00505	0.849	2.277	3.462	2.22e-02	0.103	-4.277	L5D6_OR_VS_L5D6_Ctr	noSig	LOC101744245
506	KWMTBOMO00506	-0.058	0.071	-1.113	3.23e-01	0.631	-7.145	L5D6_OR_VS_L5D6_Ctr	noSig	LOC101744484
507	KWMTBOMO00507	-0.031	0.035	-0.612	5.71e-01	0.897	-7.593	L5D6_OR_VS_L5D6_Ctr	noSig	LOC101740985
508	KWMTBOMO00508	-0.012	0.044	-0.243	8.19e-01	1	-7.778	L5D6_OR_VS_L5D6_Ctr	noSig	NA
509	KWMTBOMO00509	0	0	0	1.00e+00	1	-7.814	L5D6_OR_VS_L5D6_Ctr	noSig	NA
510	KWMTBOMO00510	-0.497	0.412	-8.133	8.28e-04	0.0117	-0.394	L5D6_OR_VS_L5D6_Ctr	noSig	LOC110386423
511	KWMTBOMO00511	-0.701	2.313	-3.251	2.74e-02	0.119	-4.52	L5D6_OR_VS_L5D6_Ctr	noSig	LOC101741127
512	KWMTBOMO00512	-1.828	3.771	-14.042	8.14e-05	0.00356	2.314	L5D6_OR_VS_L5D6_Ctr	down	LOC101744872
513	KWMTBOMO00513	-0.341	1.517	-2.799	4.40e-02	0.171	-5.061	L5D6_OR_VS_L5D6_Ctr	noSig	LOC101744727
514	KWMTBOMO00514	-0.388	0.788	-1.788	1.42e-01	0.387	-6.342	L5D6_OR_VS_L5D6_Ctr	noSig	LOC101739102
515	KWMTBOMO00515	0.092	0.046	1.048	3.49e-01	0.631	-7.213	L5D6_OR_VS_L5D6_Ctr	noSig	NA
516	KWMTBOMO00516	-0.643	1.366	-6.153	2.59e-03	0.0235	-1.748	L5D6_OR_VS_L5D6_Ctr	down	LOC101741411
517	KWMTBOMO00517	0	0	0	1.00e+00	1	-7.814	L5D6_OR_VS_L5D6_Ctr	noSig	NA
518	KWMTBOMO00518	0	0	0	1.00e+00	1	-7.814	L5D6_OR_VS_L5D6_Ctr	noSig	LOC101741693
519	KWMTBOMO00519	0	0	0	1.00e+00	1	-7.814	L5D6_OR_VS_L5D6_Ctr	noSig	LOC101745203
520	KWMTBOMO00520	0.136	1.96	0.595	5.81e-01	0.908	-7.605	L5D6_OR_VS_L5D6_Ctr	noSig	LOC101745353
521	KWMTBOMO00521	-0.825	1.013	-5.503	4.03e-03	0.0314	-2.273	L5D6_OR_VS_L5D6_Ctr	down	LOC101745497
522	KWMTBOMO00522	-0.324	0.38	-1.814	1.37e-01	0.379	-6.309	L5D6_OR_VS_L5D6_Ctr	noSig	LOC105842568
523	KWMTBOMO00523	-0.08	0.04	-1.048	3.49e-01	0.631	-7.213	L5D6_OR_VS_L5D6_Ctr	noSig	NA
524	KWMTBOMO00524	0	0	0	1.00e+00	1	-7.814	L5D6_OR_VS_L5D6_Ctr	noSig	LOC101745636
525	KWMTBOMO00525	-0.309	3.975	-2.861	4.11e-02	0.162	-4.985	L5D6_OR_VS_L5D6_Ctr	noSig	LOC101745785
526	KWMTBOMO00526	-1.046	1.776	-6.829	1.70e-03	0.0179	-1.248	L5D6_OR_VS_L5D6_Ctr	down	LOC101745930
527	KWMTBOMO00527	0.25	4.926	1.432	2.19e-01	0.527	-6.783	L5D6_OR_VS_L5D6_Ctr	noSig	LOC693096
528	KWMTBOMO00528	0.014	0.007	1.042	3.51e-01	0.631	-7.219	L5D6_OR_VS_L5D6_Ctr	noSig	LOC101741990
529	KWMTBOMO00529	0	0	0	1.00e+00	1	-7.814	L5D6_OR_VS_L5D6_Ctr	noSig	LOC101742131
530	KWMTBOMO00530	0.028	0.133	0.216	8.39e-01	1	-7.785	L5D6_OR_VS_L5D6_Ctr	noSig	LOC101746219
531	KWMTBOMO00531	0.15	5.944	2.869	4.08e-02	0.161	-4.976	L5D6_OR_VS_L5D6_Ctr	noSig	LOC101746877
532	KWMTBOMO00532	-0.631	0.576	-8.423	7.16e-04	0.0107	-0.221	L5D6_OR_VS_L5D6_Ctr	down	LOC101746737
533	KWMTBOMO00533	-0.088	0.399	-2.043	1.04e-01	0.313	-6.017	L5D6_OR_VS_L5D6_Ctr	noSig	LOC110386050
534	KWMTBOMO00534	-0.276	0.545	-0.763	4.85e-01	0.795	-7.479	L5D6_OR_VS_L5D6_Ctr	noSig	LOC100174850
535	KWMTBOMO00535	-1.232	1.604	-10.758	2.55e-04	0.00608	0.994	L5D6_OR_VS_L5D6_Ctr	down	LOC101742281
536	KWMTBOMO00536	0	0	0	1.00e+00	1	-7.814	L5D6_OR_VS_L5D6_Ctr	noSig	LOC101742423
537	KWMTBOMO00537	-0.392	1.016	-2.523	5.97e-02	0.213	-5.404	L5D6_OR_VS_L5D6_Ctr	noSig	LOC101742568
538	KWMTBOMO00538	-0.372	0.464	-2.018	1.07e-01	0.319	-6.049	L5D6_OR_VS_L5D6_Ctr	noSig	LOC101742709
539	KWMTBOMO00539	-0.654	2.35	-10.177	3.23e-04	0.00687	0.718	L5D6_OR_VS_L5D6_Ctr	down	LOC101743001
540	KWMTBOMO00540	-0.217	0.32	-2.881	4.03e-02	0.16	-4.962	L5D6_OR_VS_L5D6_Ctr	noSig	LOC101743144
541	KWMTBOMO00541	-1.515	0.853	-8	8.87e-04	0.0121	-0.475	L5D6_OR_VS_L5D6_Ctr	down	NA
542	KWMTBOMO00542	0.172	4.28	0.567	5.98e-01	0.927	-7.624	L5D6_OR_VS_L5D6_Ctr	noSig	LOC101735439
543	KWMTBOMO00543	0.276	0.679	0.906	4.12e-01	0.706	-7.353	L5D6_OR_VS_L5D6_Ctr	noSig	LOC101735714
544	KWMTBOMO00544	-0.226	5.788	-1.993	1.11e-01	0.326	-6.081	L5D6_OR_VS_L5D6_Ctr	noSig	LOC101735848
545	KWMTBOMO00545	2.377	3.581	7.289	1.30e-03	0.0151	-0.931	L5D6_OR_VS_L5D6_Ctr	up	Ldh
546	KWMTBOMO00546	-0.692	1.847	-6.858	1.67e-03	0.0177	-1.227	L5D6_OR_VS_L5D6_Ctr	down	NA
547	KWMTBOMO00547	-0.014	0.007	-1.042	3.51e-01	0.631	-7.219	L5D6_OR_VS_L5D6_Ctr	noSig	NA
548	KWMTBOMO00548	-0.093	1.482	-0.741	4.96e-01	0.809	-7.497	L5D6_OR_VS_L5D6_Ctr	noSig	LOC101743427
549	KWMTBOMO00549	-1.901	1.61	-9.576	4.18e-04	0.00802	0.415	L5D6_OR_VS_L5D6_Ctr	down	LOC101736297
550	KWMTBOMO00550	-0.076	0.973	-0.982	3.77e-01	0.659	-7.279	L5D6_OR_VS_L5D6_Ctr	noSig	LOC101743567
551	KWMTBOMO00551	-0.051	0.2	-0.319	7.65e-01	1	-7.752	L5D6_OR_VS_L5D6_Ctr	noSig	LOC101736424
552	KWMTBOMO00552	0.082	2.853	1.091	3.32e-01	0.631	-7.168	L5D6_OR_VS_L5D6_Ctr	noSig	LOC101743708
553	KWMTBOMO00553	-0.047	0.033	-1.645	1.69e-01	0.439	-6.522	L5D6_OR_VS_L5D6_Ctr	noSig	LOC110386823
554	KWMTBOMO00554	-0.33	0.212	-2.541	5.85e-02	0.21	-5.382	L5D6_OR_VS_L5D6_Ctr	noSig	LOC101743860
555	KWMTBOMO00555	0.028	0.014	1.046	3.50e-01	0.631	-7.215	L5D6_OR_VS_L5D6_Ctr	noSig	LOC101736736
556	KWMTBOMO00556	-0.103	0.976	-0.684	5.28e-01	0.848	-7.541	L5D6_OR_VS_L5D6_Ctr	noSig	LOC101736863
557	KWMTBOMO00557	-0.197	0.168	-4.331	1.00e-02	0.0586	-3.351	L5D6_OR_VS_L5D6_Ctr	noSig	NA
558	KWMTBOMO00558	-0.162	0.081	-1.824	1.36e-01	0.375	-6.297	L5D6_OR_VS_L5D6_Ctr	noSig	LOC110386422
559	KWMTBOMO00559	-0.152	0.2	-2.525	5.96e-02	0.213	-5.403	L5D6_OR_VS_L5D6_Ctr	noSig	NA
560	KWMTBOMO00560	0.047	0.023	2.091	9.85e-02	0.304	-5.955	L5D6_OR_VS_L5D6_Ctr	noSig	NA
561	KWMTBOMO00561	0.01	0.005	1.035	3.54e-01	0.631	-7.226	L5D6_OR_VS_L5D6_Ctr	noSig	NA
562	KWMTBOMO00562	-0.097	0.183	-0.701	5.19e-01	0.836	-7.528	L5D6_OR_VS_L5D6_Ctr	noSig	LOC101736996
563	KWMTBOMO00563	-0.035	0.041	-0.584	5.88e-01	0.915	-7.612	L5D6_OR_VS_L5D6_Ctr	noSig	NA
564	KWMTBOMO00564	0	0	0	1.00e+00	1	-7.814	L5D6_OR_VS_L5D6_Ctr	noSig	NA
565	KWMTBOMO00565	0	0	0	1.00e+00	1	-7.814	L5D6_OR_VS_L5D6_Ctr	noSig	NA
566	KWMTBOMO00566	0.037	0.019	1.047	3.49e-01	0.631	-7.214	L5D6_OR_VS_L5D6_Ctr	noSig	LOC101737229
567	KWMTBOMO00567	-0.046	0.051	-1.038	3.53e-01	0.631	-7.224	L5D6_OR_VS_L5D6_Ctr	noSig	LOC101744007
568	KWMTBOMO00568	0.226	1.29	1.314	2.53e-01	0.587	-6.922	L5D6_OR_VS_L5D6_Ctr	noSig	LOC101744151
569	KWMTBOMO00569	0.001	0.028	0.02	9.85e-01	1	-7.813	L5D6_OR_VS_L5D6_Ctr	noSig	NGR-B2
570	KWMTBOMO00570	-0.758	0.937	-6.513	2.06e-03	0.0202	-1.476	L5D6_OR_VS_L5D6_Ctr	down	NA
571	KWMTBOMO00571	0.023	0.012	1.046	3.50e-01	0.631	-7.216	L5D6_OR_VS_L5D6_Ctr	noSig	LOC101738639
572	KWMTBOMO00572	-0.009	0.167	-0.266	8.02e-01	1	-7.771	L5D6_OR_VS_L5D6_Ctr	noSig	LOC105842503
573	KWMTBOMO00573	-0.141	0.07	-1.048	3.49e-01	0.631	-7.213	L5D6_OR_VS_L5D6_Ctr	noSig	LOC101737608
574	KWMTBOMO00574	0.584	2.665	2.879	4.03e-02	0.16	-4.963	L5D6_OR_VS_L5D6_Ctr	noSig	LOC101737749
575	KWMTBOMO00575	0.554	2.036	1.485	2.06e-01	0.503	-6.719	L5D6_OR_VS_L5D6_Ctr	noSig	NA
576	KWMTBOMO00576	0.732	1.911	4.46	9.01e-03	0.0541	-3.224	L5D6_OR_VS_L5D6_Ctr	noSig	LOC101745012
577	KWMTBOMO00577	-0.059	0.171	-1.522	1.96e-01	0.487	-6.674	L5D6_OR_VS_L5D6_Ctr	noSig	NA
578	KWMTBOMO00578	0.229	0.991	0.799	4.65e-01	0.772	-7.448	L5D6_OR_VS_L5D6_Ctr	noSig	NA
579	KWMTBOMO00579	0.224	0.208	3.249	2.74e-02	0.12	-4.522	L5D6_OR_VS_L5D6_Ctr	noSig	LOC101737885
580	KWMTBOMO00580	-0.587	1.785	-3.925	1.43e-02	0.0751	-3.77	L5D6_OR_VS_L5D6_Ctr	noSig	LOC101738019
581	KWMTBOMO00581	-0.012	0.053	-0.196	8.53e-01	1	-7.79	L5D6_OR_VS_L5D6_Ctr	noSig	LOC101738235
582	KWMTBOMO00582	-0.433	0.765	-7.098	1.45e-03	0.016	-1.061	L5D6_OR_VS_L5D6_Ctr	noSig	LOC101745161
583	KWMTBOMO00583	-0.25	0.239	-2.389	6.95e-02	0.239	-5.574	L5D6_OR_VS_L5D6_Ctr	noSig	NA
584	KWMTBOMO00584	-0.267	1.286	-0.627	5.62e-01	0.887	-7.583	L5D6_OR_VS_L5D6_Ctr	noSig	LOC101738367
585	KWMTBOMO00585	0	0	0	1.00e+00	1	-7.814	L5D6_OR_VS_L5D6_Ctr	noSig	LOC101745307
586	KWMTBOMO00586	0	0	0	1.00e+00	1	-7.814	L5D6_OR_VS_L5D6_Ctr	noSig	NA
587	KWMTBOMO00587	0.033	0.016	1.047	3.49e-01	0.631	-7.214	L5D6_OR_VS_L5D6_Ctr	noSig	LOC101738771
588	KWMTBOMO00588	-0.335	1.987	-2.62	5.36e-02	0.197	-5.284	L5D6_OR_VS_L5D6_Ctr	noSig	LOC101739053
589	KWMTBOMO00589	-0.758	2.477	-4.443	9.13e-03	0.0546	-3.24	L5D6_OR_VS_L5D6_Ctr	noSig	LOC101745447
590	KWMTBOMO00590	-0.968	2.675	-5.052	5.62e-03	0.0391	-2.666	L5D6_OR_VS_L5D6_Ctr	down	LOC692752
591	KWMTBOMO00591	-0.449	3.751	-3.374	2.42e-02	0.109	-4.378	L5D6_OR_VS_L5D6_Ctr	noSig	LOC101739199
592	KWMTBOMO00592	-0.358	3.576	-1.365	2.38e-01	0.56	-6.862	L5D6_OR_VS_L5D6_Ctr	noSig	LOC100302108
593	KWMTBOMO00593	0	0	0	1.00e+00	1	-7.814	L5D6_OR_VS_L5D6_Ctr	noSig	LOC101745591
594	KWMTBOMO00594	0	0	0	1.00e+00	1	-7.814	L5D6_OR_VS_L5D6_Ctr	noSig	LOC101745743
595	KWMTBOMO00595	0	0	0	1.00e+00	1	-7.814	L5D6_OR_VS_L5D6_Ctr	noSig	LOC105842554
596	KWMTBOMO00596	0	0	0	1.00e+00	1	-7.814	L5D6_OR_VS_L5D6_Ctr	noSig	NA
597	KWMTBOMO00597	0	0	0	1.00e+00	1	-7.814	L5D6_OR_VS_L5D6_Ctr	noSig	LOC101739338
598	KWMTBOMO00598	0.01	0.037	0.25	8.14e-01	1	-7.776	L5D6_OR_VS_L5D6_Ctr	noSig	NA
599	KWMTBOMO00599	0.01	0.005	1.035	3.54e-01	0.631	-7.226	L5D6_OR_VS_L5D6_Ctr	noSig	LOC101746024
600	KWMTBOMO00600	0	0	0	1.00e+00	1	-7.814	L5D6_OR_VS_L5D6_Ctr	noSig	LOC101746166
601	KWMTBOMO00601	-0.152	0.222	-4.604	8.00e-03	0.05	-3.083	L5D6_OR_VS_L5D6_Ctr	noSig	NA
602	KWMTBOMO00602	-0.009	0.023	-0.284	7.89e-01	1	-7.765	L5D6_OR_VS_L5D6_Ctr	noSig	NA
603	KWMTBOMO00603	0	0	0	1.00e+00	1	-7.814	L5D6_OR_VS_L5D6_Ctr	noSig	NA
604	KWMTBOMO00604	0	0	0	1.00e+00	1	-7.814	L5D6_OR_VS_L5D6_Ctr	noSig	NA
605	KWMTBOMO00605	-0.088	0.086	-1.361	2.39e-01	0.562	-6.867	L5D6_OR_VS_L5D6_Ctr	noSig	LOC101739482
606	KWMTBOMO00606	-0.27	1.412	-1.253	2.73e-01	0.618	-6.991	L5D6_OR_VS_L5D6_Ctr	noSig	LOC101739618
607	KWMTBOMO00607	0.145	1.238	1.286	2.62e-01	0.601	-6.954	L5D6_OR_VS_L5D6_Ctr	noSig	NA
608	KWMTBOMO00608	0	0	0	1.00e+00	1	-7.814	L5D6_OR_VS_L5D6_Ctr	noSig	LOC105841445
609	KWMTBOMO00609	0.08	0.04	1.048	3.49e-01	0.631	-7.213	L5D6_OR_VS_L5D6_Ctr	noSig	NA
610	KWMTBOMO00610	0.019	0.009	1.044	3.50e-01	0.631	-7.217	L5D6_OR_VS_L5D6_Ctr	noSig	LOC105841448
611	KWMTBOMO00611	0.782	0.391	4.157	1.17e-02	0.0652	-3.527	L5D6_OR_VS_L5D6_Ctr	noSig	NA
612	KWMTBOMO00612	0.005	0.035	0.189	8.58e-01	1	-7.792	L5D6_OR_VS_L5D6_Ctr	noSig	NA
613	KWMTBOMO00613	0	0	0	1.00e+00	1	-7.814	L5D6_OR_VS_L5D6_Ctr	noSig	NA
614	KWMTBOMO00614	-0.192	0.115	-1.834	1.34e-01	0.373	-6.284	L5D6_OR_VS_L5D6_Ctr	noSig	LOC101745029
615	KWMTBOMO00615	-0.005	0.049	-0.123	9.08e-01	1	-7.804	L5D6_OR_VS_L5D6_Ctr	noSig	NA
616	KWMTBOMO00616	-0.179	0.2	-2.12	9.52e-02	0.301	-5.919	L5D6_OR_VS_L5D6_Ctr	noSig	NA
617	KWMTBOMO00617	-0.258	2.18	-2.004	1.09e-01	0.323	-6.067	L5D6_OR_VS_L5D6_Ctr	noSig	LOC101744889
618	KWMTBOMO00618	-0.133	0.314	-0.921	4.05e-01	0.697	-7.338	L5D6_OR_VS_L5D6_Ctr	noSig	NA
619	KWMTBOMO00619	-0.396	0.963	-5.636	3.67e-03	0.0294	-2.162	L5D6_OR_VS_L5D6_Ctr	noSig	LOC101746464
620	KWMTBOMO00620	-1.964	4.174	-32.262	2.18e-06	0.00103	6.07	L5D6_OR_VS_L5D6_Ctr	down	LOC101744744
621	KWMTBOMO00621	-1.108	2.697	-7.092	1.46e-03	0.0161	-1.064	L5D6_OR_VS_L5D6_Ctr	down	LOC101744602
622	KWMTBOMO00622	0.107	0.054	1.048	3.49e-01	0.631	-7.213	L5D6_OR_VS_L5D6_Ctr	noSig	LOC105841444
623	KWMTBOMO00623	-0.294	0.673	-1.275	2.66e-01	0.607	-6.966	L5D6_OR_VS_L5D6_Ctr	noSig	LOC101746325
624	KWMTBOMO00624	0	0	0	1.00e+00	1	-7.814	L5D6_OR_VS_L5D6_Ctr	noSig	LOC101744456
625	KWMTBOMO00625	-0.054	0.083	-1.49	2.04e-01	0.501	-6.713	L5D6_OR_VS_L5D6_Ctr	noSig	NA
626	KWMTBOMO00626	0	0	0	1.00e+00	1	-7.814	L5D6_OR_VS_L5D6_Ctr	noSig	NA
627	KWMTBOMO00627	0.441	2.788	2.027	1.06e-01	0.317	-6.037	L5D6_OR_VS_L5D6_Ctr	noSig	LOC101744218
628	KWMTBOMO00628	-0.046	0.023	-1.047	3.49e-01	0.631	-7.214	L5D6_OR_VS_L5D6_Ctr	noSig	LOC101746038
629	KWMTBOMO00629	0	0	0	1.00e+00	1	-7.814	L5D6_OR_VS_L5D6_Ctr	noSig	NA
630	KWMTBOMO00630	0	0	0	1.00e+00	1	-7.814	L5D6_OR_VS_L5D6_Ctr	noSig	NA
631	KWMTBOMO00631	0.653	1.373	3.209	2.86e-02	0.123	-4.569	L5D6_OR_VS_L5D6_Ctr	noSig	LOC101743877
632	KWMTBOMO00632	-0.062	0.082	-0.893	4.18e-01	0.714	-7.365	L5D6_OR_VS_L5D6_Ctr	noSig	NA
633	KWMTBOMO00633	0.013	0.753	0.048	9.64e-01	1	-7.812	L5D6_OR_VS_L5D6_Ctr	noSig	NA
634	KWMTBOMO00634	-0.036	0.231	-0.262	8.05e-01	1	-7.772	L5D6_OR_VS_L5D6_Ctr	noSig	NA
635	KWMTBOMO00635	0.019	0.009	1.044	3.50e-01	0.631	-7.217	L5D6_OR_VS_L5D6_Ctr	noSig	NA
636	KWMTBOMO00636	0.333	3.593	1.672	1.63e-01	0.43	-6.489	L5D6_OR_VS_L5D6_Ctr	noSig	LOC105841453
637	KWMTBOMO00637	-0.439	4.392	-1.789	1.42e-01	0.387	-6.341	L5D6_OR_VS_L5D6_Ctr	noSig	NA
638	KWMTBOMO00638	-0.533	4.14	-3.413	2.33e-02	0.106	-4.333	L5D6_OR_VS_L5D6_Ctr	noSig	COPB2
639	KWMTBOMO00639	-0.628	0.692	-4.794	6.87e-03	0.0449	-2.903	L5D6_OR_VS_L5D6_Ctr	down	LOC101745755
640	KWMTBOMO00640	-1.07	3.49	-6.089	2.70e-03	0.0242	-1.798	L5D6_OR_VS_L5D6_Ctr	down	LOC101743586
641	KWMTBOMO00641	-0.4	0.813	-4.013	1.33e-02	0.071	-3.677	L5D6_OR_VS_L5D6_Ctr	noSig	LOC105841451
642	KWMTBOMO00642	0.033	0.016	1.047	3.49e-01	0.631	-7.214	L5D6_OR_VS_L5D6_Ctr	noSig	NGR-A18
643	KWMTBOMO00643	-0.318	0.533	-3.154	3.02e-02	0.129	-4.633	L5D6_OR_VS_L5D6_Ctr	noSig	NA
644	KWMTBOMO00644	0.023	0.012	1.046	3.50e-01	0.631	-7.216	L5D6_OR_VS_L5D6_Ctr	noSig	os
645	KWMTBOMO00645	-0.272	0.277	-0.654	5.46e-01	0.868	-7.564	L5D6_OR_VS_L5D6_Ctr	noSig	NA
646	KWMTBOMO00646	0	0	0	1.00e+00	1	-7.814	L5D6_OR_VS_L5D6_Ctr	noSig	LOC101743217
647	KWMTBOMO00647	0	0	0	1.00e+00	1	-7.814	L5D6_OR_VS_L5D6_Ctr	noSig	NA
648	KWMTBOMO00648	0	0	0	1.00e+00	1	-7.814	L5D6_OR_VS_L5D6_Ctr	noSig	NA
649	KWMTBOMO00649	0	0	0	1.00e+00	1	-7.814	L5D6_OR_VS_L5D6_Ctr	noSig	LOC101742678
650	KWMTBOMO00650	-0.066	0.09	-0.564	6.01e-01	0.929	-7.626	L5D6_OR_VS_L5D6_Ctr	noSig	PAH
651	KWMTBOMO00651	-0.904	4.02	-4.889	6.38e-03	0.0425	-2.816	L5D6_OR_VS_L5D6_Ctr	down	Awh
652	KWMTBOMO00652	-0.691	1.017	-4.086	1.24e-02	0.0682	-3.601	L5D6_OR_VS_L5D6_Ctr	noSig	LOC101745607
653	KWMTBOMO00653	0.037	0.019	1.047	3.49e-01	0.631	-7.214	L5D6_OR_VS_L5D6_Ctr	noSig	LOC110385516
654	KWMTBOMO00654	-0.356	0.991	-1.552	1.89e-01	0.476	-6.637	L5D6_OR_VS_L5D6_Ctr	noSig	Cycb
655	KWMTBOMO00655	-0.116	0.711	-0.369	7.29e-01	1	-7.732	L5D6_OR_VS_L5D6_Ctr	noSig	LOC100101168
656	KWMTBOMO00656	0	0	0	1.00e+00	1	-7.814	L5D6_OR_VS_L5D6_Ctr	noSig	NA
657	KWMTBOMO00657	-0.023	0.03	-0.519	6.29e-01	0.958	-7.653	L5D6_OR_VS_L5D6_Ctr	noSig	LOC101742534
658	KWMTBOMO00658	0	0	0	1.00e+00	1	-7.814	L5D6_OR_VS_L5D6_Ctr	noSig	LOC101735489
659	KWMTBOMO00659	0	0	0	1.00e+00	1	-7.814	L5D6_OR_VS_L5D6_Ctr	noSig	NA
660	KWMTBOMO00660	-1.139	2.62	-7.32	1.28e-03	0.015	-0.91	L5D6_OR_VS_L5D6_Ctr	down	LOC101742096
661	KWMTBOMO00661	0.01	0.051	0.188	8.59e-01	1	-7.792	L5D6_OR_VS_L5D6_Ctr	noSig	LOC101741858
662	KWMTBOMO00662	0	0	0	1.00e+00	1	-7.814	L5D6_OR_VS_L5D6_Ctr	noSig	LOC101741710
663	KWMTBOMO00663	0	0	0	1.00e+00	1	-7.814	L5D6_OR_VS_L5D6_Ctr	noSig	LOC101741565
664	KWMTBOMO00664	0	0	0	1.00e+00	1	-7.814	L5D6_OR_VS_L5D6_Ctr	noSig	LOC101745324
665	KWMTBOMO00665	0	0	0	1.00e+00	1	-7.814	L5D6_OR_VS_L5D6_Ctr	noSig	Or-3
666	KWMTBOMO00666	-0.08	0.04	-1.048	3.49e-01	0.631	-7.213	L5D6_OR_VS_L5D6_Ctr	noSig	NA
667	KWMTBOMO00667	-0.546	0.297	-1.004	3.68e-01	0.649	-7.258	L5D6_OR_VS_L5D6_Ctr	noSig	NA
668	KWMTBOMO00668	-0.063	0.06	-1.244	2.76e-01	0.623	-7.001	L5D6_OR_VS_L5D6_Ctr	noSig	LOC110385823
669	KWMTBOMO00669	0.005	0.002	1	3.69e-01	0.649	-7.262	L5D6_OR_VS_L5D6_Ctr	noSig	LOC101742877
670	KWMTBOMO00670	0	0	0	1.00e+00	1	-7.814	L5D6_OR_VS_L5D6_Ctr	noSig	LOC101742726
671	KWMTBOMO00671	-0.049	1.491	-0.275	7.96e-01	1	-7.768	L5D6_OR_VS_L5D6_Ctr	noSig	LOC101735501
672	KWMTBOMO00672	-0.238	0.325	-11.594	1.85e-04	0.00518	1.366	L5D6_OR_VS_L5D6_Ctr	noSig	LOC110386603
673	KWMTBOMO00673	-0.009	0.037	-0.177	8.67e-01	1	-7.795	L5D6_OR_VS_L5D6_Ctr	noSig	LOC101747166
674	KWMTBOMO00674	0	0	0	1.00e+00	1	-7.814	L5D6_OR_VS_L5D6_Ctr	noSig	NA
675	KWMTBOMO00675	0.028	0.014	1.046	3.50e-01	0.631	-7.215	L5D6_OR_VS_L5D6_Ctr	noSig	NA
676	KWMTBOMO00676	0.076	1.199	0.51	6.34e-01	0.965	-7.659	L5D6_OR_VS_L5D6_Ctr	noSig	LOC101747027
677	KWMTBOMO00677	0.525	5.232	2.567	5.68e-02	0.206	-5.35	L5D6_OR_VS_L5D6_Ctr	noSig	LOC101742491
678	KWMTBOMO00678	-0.633	4.663	-5.238	4.89e-03	0.0355	-2.501	L5D6_OR_VS_L5D6_Ctr	down	LOC101746894
679	KWMTBOMO00679	0.268	3.35	3.606	1.93e-02	0.0925	-4.116	L5D6_OR_VS_L5D6_Ctr	noSig	NA
680	KWMTBOMO00680	0.331	3.645	2.273	7.95e-02	0.263	-5.722	L5D6_OR_VS_L5D6_Ctr	noSig	LOC101742339
681	KWMTBOMO00681	-0.302	1.501	-5.58	3.82e-03	0.0302	-2.208	L5D6_OR_VS_L5D6_Ctr	noSig	LOC101742200
682	KWMTBOMO00682	0.051	0.026	1.658	1.66e-01	0.435	-6.506	L5D6_OR_VS_L5D6_Ctr	noSig	LOC101746751
683	KWMTBOMO00683	0	0	0	1.00e+00	1	-7.814	L5D6_OR_VS_L5D6_Ctr	noSig	LOC101742051
684	KWMTBOMO00684	0	0	0	1.00e+00	1	-7.814	L5D6_OR_VS_L5D6_Ctr	noSig	LOC101746611
685	KWMTBOMO00685	0	0	0	1.00e+00	1	-7.814	L5D6_OR_VS_L5D6_Ctr	noSig	NA
686	KWMTBOMO00686	0.259	0.331	2.525	5.95e-02	0.213	-5.402	L5D6_OR_VS_L5D6_Ctr	noSig	LOC101746465
687	KWMTBOMO00687	0.661	8.044	2.794	4.42e-02	0.171	-5.067	L5D6_OR_VS_L5D6_Ctr	noSig	LOC101738423
688	KWMTBOMO00688	0.575	1.367	7.203	1.37e-03	0.0155	-0.989	L5D6_OR_VS_L5D6_Ctr	up	LOC101741660
689	KWMTBOMO00689	0.685	3.733	5.458	4.17e-03	0.0321	-2.311	L5D6_OR_VS_L5D6_Ctr	up	LOC101741519
690	KWMTBOMO00690	0	0	0	1.00e+00	1	-7.814	L5D6_OR_VS_L5D6_Ctr	noSig	NA
691	KWMTBOMO00691	0	0	0	1.00e+00	1	-7.814	L5D6_OR_VS_L5D6_Ctr	noSig	NA
692	KWMTBOMO00692	0	0	0	1.00e+00	1	-7.814	L5D6_OR_VS_L5D6_Ctr	noSig	NA
693	KWMTBOMO00693	-0.023	0.012	-1.046	3.50e-01	0.631	-7.216	L5D6_OR_VS_L5D6_Ctr	noSig	LOC101741243
694	KWMTBOMO00694	-0.095	0.17	-0.536	6.18e-01	0.947	-7.643	L5D6_OR_VS_L5D6_Ctr	noSig	LOC101746326
695	KWMTBOMO00695	-0.908	4.963	-7.444	1.19e-03	0.0144	-0.828	L5D6_OR_VS_L5D6_Ctr	down	LOC101746182
696	KWMTBOMO00696	0.028	0.136	0.196	8.53e-01	1	-7.79	L5D6_OR_VS_L5D6_Ctr	noSig	LOC101741103
697	KWMTBOMO00697	0.028	0.014	1.046	3.50e-01	0.631	-7.215	L5D6_OR_VS_L5D6_Ctr	noSig	NA
698	KWMTBOMO00698	0.093	0.305	0.451	6.73e-01	1	-7.692	L5D6_OR_VS_L5D6_Ctr	noSig	LOC105841470
699	KWMTBOMO00699	-0.642	3.006	-3.687	1.79e-02	0.0876	-4.027	L5D6_OR_VS_L5D6_Ctr	noSig	LOC101740962
700	KWMTBOMO00700	-0.196	1.657	-0.959	3.87e-01	0.673	-7.302	L5D6_OR_VS_L5D6_Ctr	noSig	NA
701	KWMTBOMO00701	0	0	0	1.00e+00	1	-7.814	L5D6_OR_VS_L5D6_Ctr	noSig	LOC105842336
702	KWMTBOMO00702	0.035	0.155	0.193	8.55e-01	1	-7.791	L5D6_OR_VS_L5D6_Ctr	noSig	LOC105841553
703	KWMTBOMO00703	0	0	0	1.00e+00	1	-7.814	L5D6_OR_VS_L5D6_Ctr	noSig	LOC101746039
704	KWMTBOMO00704	0.406	3.459	2.942	3.77e-02	0.152	-4.887	L5D6_OR_VS_L5D6_Ctr	noSig	LOC101740674
705	KWMTBOMO00705	0	0	0	1.00e+00	1	-7.814	L5D6_OR_VS_L5D6_Ctr	noSig	NA
706	KWMTBOMO00706	0.382	0.876	1.011	3.65e-01	0.645	-7.251	L5D6_OR_VS_L5D6_Ctr	noSig	LOC101740538
707	KWMTBOMO00707	-0.196	0.648	-1.006	3.67e-01	0.648	-7.256	L5D6_OR_VS_L5D6_Ctr	noSig	LOC101740401
708	KWMTBOMO00708	0.014	0.007	1.042	3.51e-01	0.631	-7.219	L5D6_OR_VS_L5D6_Ctr	noSig	LOC101745756
709	KWMTBOMO00709	-0.079	0.361	-0.472	6.60e-01	0.991	-7.681	L5D6_OR_VS_L5D6_Ctr	noSig	LOC101745608
710	KWMTBOMO00710	-0.153	0.348	-1.812	1.38e-01	0.379	-6.312	L5D6_OR_VS_L5D6_Ctr	noSig	Hmg-r
711	KWMTBOMO00711	-0.104	1.455	-0.395	7.12e-01	1	-7.72	L5D6_OR_VS_L5D6_Ctr	noSig	LOC101740183
712	KWMTBOMO00712	-1.375	4.128	-7.316	1.28e-03	0.015	-0.913	L5D6_OR_VS_L5D6_Ctr	down	LOC101745746
713	KWMTBOMO00713	-0.281	0.886	-1.263	2.69e-01	0.613	-6.98	L5D6_OR_VS_L5D6_Ctr	noSig	LOC101740050
714	KWMTBOMO00714	0	0	0	1.00e+00	1	-7.814	L5D6_OR_VS_L5D6_Ctr	noSig	LOC101745466
715	KWMTBOMO00715	-0.455	1.032	-5.19	5.07e-03	0.0364	-2.544	L5D6_OR_VS_L5D6_Ctr	noSig	NA
716	KWMTBOMO00716	-0.132	0.653	-0.838	4.45e-01	0.748	-7.414	L5D6_OR_VS_L5D6_Ctr	noSig	LOC101745325
717	KWMTBOMO00717	0.054	0.027	1.047	3.49e-01	0.631	-7.214	L5D6_OR_VS_L5D6_Ctr	noSig	LOC105841465
718	KWMTBOMO00718	-0.29	4.347	-1.648	1.68e-01	0.438	-6.518	L5D6_OR_VS_L5D6_Ctr	noSig	LOC101745030
719	KWMTBOMO00719	-0.014	0.112	-0.113	9.15e-01	1	-7.806	L5D6_OR_VS_L5D6_Ctr	noSig	LOC105841466
720	KWMTBOMO00720	0.477	0.449	3.142	3.06e-02	0.13	-4.648	L5D6_OR_VS_L5D6_Ctr	noSig	LOC101739914
721	KWMTBOMO00721	0.002	0.32	0.016	9.88e-01	1	-7.814	L5D6_OR_VS_L5D6_Ctr	noSig	LOC101739777
722	KWMTBOMO00722	-0.413	0.682	-3.982	1.36e-02	0.0722	-3.71	L5D6_OR_VS_L5D6_Ctr	noSig	LOC101739633
723	KWMTBOMO00723	-0.96	5.528	-7.723	1.03e-03	0.0132	-0.648	L5D6_OR_VS_L5D6_Ctr	down	Pdk
724	KWMTBOMO00724	0.022	2.065	0.077	9.42e-01	1	-7.81	L5D6_OR_VS_L5D6_Ctr	noSig	LOC101739395
725	KWMTBOMO00725	-0.367	0.867	-0.601	5.78e-01	0.904	-7.601	L5D6_OR_VS_L5D6_Ctr	noSig	LOC101739259
726	KWMTBOMO00726	0.497	5.405	2.829	4.25e-02	0.166	-5.024	L5D6_OR_VS_L5D6_Ctr	noSig	LOC101739119
727	KWMTBOMO00727	0.571	0.286	5.834	3.20e-03	0.0272	-2	L5D6_OR_VS_L5D6_Ctr	up	LOC101744603
728	KWMTBOMO00728	0	0	0	1.00e+00	1	-7.814	L5D6_OR_VS_L5D6_Ctr	noSig	LOC101738971
729	KWMTBOMO00729	0.154	0.248	2.57	5.66e-02	0.205	-5.346	L5D6_OR_VS_L5D6_Ctr	noSig	LOC105841468
730	KWMTBOMO00730	-0.79	3.991	-14.81	6.47e-05	0.00322	2.575	L5D6_OR_VS_L5D6_Ctr	down	LOC101738839
731	KWMTBOMO00731	0	0	0	1.00e+00	1	-7.814	L5D6_OR_VS_L5D6_Ctr	noSig	itg
732	KWMTBOMO00732	0.023	0.012	1.046	3.50e-01	0.631	-7.216	L5D6_OR_VS_L5D6_Ctr	noSig	LOC101738437
733	KWMTBOMO00733	0	0	0	1.00e+00	1	-7.814	L5D6_OR_VS_L5D6_Ctr	noSig	LOC101738165
734	KWMTBOMO00734	0	0	0	1.00e+00	1	-7.814	L5D6_OR_VS_L5D6_Ctr	noSig	LOC101737906
735	KWMTBOMO00735	0.866	0.612	4.14	1.18e-02	0.0659	-3.545	L5D6_OR_VS_L5D6_Ctr	noSig	LOC101737624
736	KWMTBOMO00736	0	0	0	1.00e+00	1	-7.814	L5D6_OR_VS_L5D6_Ctr	noSig	LOC101737482
737	KWMTBOMO00737	0	0	0	1.00e+00	1	-7.814	L5D6_OR_VS_L5D6_Ctr	noSig	LOC101737055
738	KWMTBOMO00738	0	0	0	1.00e+00	1	-7.814	L5D6_OR_VS_L5D6_Ctr	noSig	LOC101736796
739	KWMTBOMO00739	0	0	0	1.00e+00	1	-7.814	L5D6_OR_VS_L5D6_Ctr	noSig	LOC101736564
740	KWMTBOMO00740	0	0	0	1.00e+00	1	-7.814	L5D6_OR_VS_L5D6_Ctr	noSig	LOC101736313
741	KWMTBOMO00741	0	0	0	1.00e+00	1	-7.814	L5D6_OR_VS_L5D6_Ctr	noSig	NA
742	KWMTBOMO00742	0	0	0	1.00e+00	1	-7.814	L5D6_OR_VS_L5D6_Ctr	noSig	NA
743	KWMTBOMO00743	0	0	0	1.00e+00	1	-7.814	L5D6_OR_VS_L5D6_Ctr	noSig	NA
744	KWMTBOMO00744	0	0	0	1.00e+00	1	-7.814	L5D6_OR_VS_L5D6_Ctr	noSig	LOC101742977
745	KWMTBOMO00745	0	0	0	1.00e+00	1	-7.814	L5D6_OR_VS_L5D6_Ctr	noSig	NA
746	KWMTBOMO00746	0.142	0.425	1.139	3.13e-01	0.631	-7.117	L5D6_OR_VS_L5D6_Ctr	noSig	NA
747	KWMTBOMO00747	0	0	0	1.00e+00	1	-7.814	L5D6_OR_VS_L5D6_Ctr	noSig	NA
748	KWMTBOMO00748	-0.347	2.525	-4.054	1.28e-02	0.0694	-3.634	L5D6_OR_VS_L5D6_Ctr	noSig	LOC101741961
749	KWMTBOMO00749	0.046	0.13	0.535	6.19e-01	0.948	-7.644	L5D6_OR_VS_L5D6_Ctr	noSig	NA
750	KWMTBOMO00750	0.991	2.214	3.745	1.69e-02	0.0844	-3.962	L5D6_OR_VS_L5D6_Ctr	noSig	LOC101745190
751	KWMTBOMO00751	-1.04	8.736	-8.053	8.63e-04	0.0119	-0.442	L5D6_OR_VS_L5D6_Ctr	down	Oaz
752	KWMTBOMO00752	0	0	0	1.00e+00	1	-7.814	L5D6_OR_VS_L5D6_Ctr	noSig	NA
753	KWMTBOMO00753	0	0	0	1.00e+00	1	-7.814	L5D6_OR_VS_L5D6_Ctr	noSig	LOC101740390
754	KWMTBOMO00754	0	0	0	1.00e+00	1	-7.814	L5D6_OR_VS_L5D6_Ctr	noSig	LOC101740523
755	KWMTBOMO00755	0	0	0	1.00e+00	1	-7.814	L5D6_OR_VS_L5D6_Ctr	noSig	LOC101740664
756	KWMTBOMO00756	0	0	0	1.00e+00	1	-7.814	L5D6_OR_VS_L5D6_Ctr	noSig	LOC101739706
757	KWMTBOMO00757	0	0	0	1.00e+00	1	-7.814	L5D6_OR_VS_L5D6_Ctr	noSig	LOC101739848
758	KWMTBOMO00758	0	0	0	1.00e+00	1	-7.814	L5D6_OR_VS_L5D6_Ctr	noSig	LOC101739985
759	KWMTBOMO00759	-0.122	0.061	-1.048	3.49e-01	0.631	-7.213	L5D6_OR_VS_L5D6_Ctr	noSig	LOC101740255
760	KWMTBOMO00760	0.155	4.198	0.75	4.91e-01	0.804	-7.489	L5D6_OR_VS_L5D6_Ctr	noSig	Era.4
761	KWMTBOMO00761	0.1	0.05	1.91	1.22e-01	0.35	-6.187	L5D6_OR_VS_L5D6_Ctr	noSig	Erb.3
762	KWMTBOMO00762	0	0	0	1.00e+00	1	-7.814	L5D6_OR_VS_L5D6_Ctr	noSig	Era.1
763	KWMTBOMO00763	0	0	0	1.00e+00	1	-7.814	L5D6_OR_VS_L5D6_Ctr	noSig	Erb.2
764	KWMTBOMO00764	0	0	0	1.00e+00	1	-7.814	L5D6_OR_VS_L5D6_Ctr	noSig	5h4
765	KWMTBOMO00765	0	0	0	1.00e+00	1	-7.814	L5D6_OR_VS_L5D6_Ctr	noSig	LOC101740521
766	KWMTBOMO00766	0	0	0	1.00e+00	1	-7.814	L5D6_OR_VS_L5D6_Ctr	noSig	LOC101740806
767	KWMTBOMO00767	0	0	0	1.00e+00	1	-7.814	L5D6_OR_VS_L5D6_Ctr	noSig	LOC101740949
768	KWMTBOMO00768	0	0	0	1.00e+00	1	-7.814	L5D6_OR_VS_L5D6_Ctr	noSig	Era.5
769	KWMTBOMO00769	0	0	0	1.00e+00	1	-7.814	L5D6_OR_VS_L5D6_Ctr	noSig	NA
770	KWMTBOMO00770	0	0	0	1.00e+00	1	-7.814	L5D6_OR_VS_L5D6_Ctr	noSig	LOC101742521
771	KWMTBOMO00771	0	0	0	1.00e+00	1	-7.814	L5D6_OR_VS_L5D6_Ctr	noSig	LOC101741231
772	KWMTBOMO00772	0	0	0	1.00e+00	1	-7.814	L5D6_OR_VS_L5D6_Ctr	noSig	CPH1
773	KWMTBOMO00773	-0.176	0.667	-1.171	3.01e-01	0.631	-7.082	L5D6_OR_VS_L5D6_Ctr	noSig	LOC101742080
774	KWMTBOMO00774	0	0	0	1.00e+00	1	-7.814	L5D6_OR_VS_L5D6_Ctr	noSig	LOC101743380
775	KWMTBOMO00775	0.069	0.034	1.47	2.09e-01	0.51	-6.738	L5D6_OR_VS_L5D6_Ctr	noSig	LOC101743522
776	KWMTBOMO00776	-0.062	0.679	-0.497	6.43e-01	0.974	-7.667	L5D6_OR_VS_L5D6_Ctr	noSig	LOC101743658
777	KWMTBOMO00777	-0.458	2.316	-7.816	9.77e-04	0.0128	-0.59	L5D6_OR_VS_L5D6_Ctr	noSig	LOC101743808
778	KWMTBOMO00778	0.276	0.326	1.343	2.45e-01	0.571	-6.888	L5D6_OR_VS_L5D6_Ctr	noSig	NA
779	KWMTBOMO00779	-0.011	0.478	-0.017	9.88e-01	1	-7.814	L5D6_OR_VS_L5D6_Ctr	noSig	LOC105842583
780	KWMTBOMO00780	-0.302	1.311	-1.857	1.30e-01	0.366	-6.254	L5D6_OR_VS_L5D6_Ctr	noSig	LOC101742371
781	KWMTBOMO00781	0	0	0	1.00e+00	1	-7.814	L5D6_OR_VS_L5D6_Ctr	noSig	NA
782	KWMTBOMO00782	0.629	4.405	3.486	2.17e-02	0.101	-4.25	L5D6_OR_VS_L5D6_Ctr	noSig	LOC101742612
783	KWMTBOMO00783	-0.041	1.969	-0.228	8.30e-01	1	-7.782	L5D6_OR_VS_L5D6_Ctr	noSig	LOC692980
784	KWMTBOMO00784	-0.551	0.544	-3.952	1.40e-02	0.0735	-3.741	L5D6_OR_VS_L5D6_Ctr	noSig	LOC101742758
785	KWMTBOMO00785	-0.032	2.941	-0.247	8.16e-01	1	-7.777	L5D6_OR_VS_L5D6_Ctr	noSig	LOC101743957
786	KWMTBOMO00786	0.722	6.968	4.415	9.35e-03	0.0555	-3.267	L5D6_OR_VS_L5D6_Ctr	noSig	LOC693069
787	KWMTBOMO00787	-0.105	0.081	-1.365	2.38e-01	0.56	-6.862	L5D6_OR_VS_L5D6_Ctr	noSig	LOC110386069
788	KWMTBOMO00788	0.963	1.673	5.72	3.46e-03	0.0284	-2.092	L5D6_OR_VS_L5D6_Ctr	up	gly
789	KWMTBOMO00789	0.858	5.194	2.936	3.79e-02	0.152	-4.894	L5D6_OR_VS_L5D6_Ctr	noSig	LOC101743287
790	KWMTBOMO00790	0	0	0	1.00e+00	1	-7.814	L5D6_OR_VS_L5D6_Ctr	noSig	LOC101743428
791	KWMTBOMO00791	-0.285	5.318	-2.105	9.69e-02	0.304	-5.938	L5D6_OR_VS_L5D6_Ctr	noSig	LOC101744247
792	KWMTBOMO00792	0.08	0.09	1.019	3.61e-01	0.64	-7.243	L5D6_OR_VS_L5D6_Ctr	noSig	LOC733009
793	KWMTBOMO00793	0.813	1.754	4.465	8.97e-03	0.054	-3.219	L5D6_OR_VS_L5D6_Ctr	noSig	LOC101743807
794	KWMTBOMO00794	0.939	5.913	3.964	1.38e-02	0.0731	-3.728	L5D6_OR_VS_L5D6_Ctr	noSig	LOC732899
795	KWMTBOMO00795	-0.339	2.616	-1.576	1.84e-01	0.467	-6.608	L5D6_OR_VS_L5D6_Ctr	noSig	LOC101743956
796	KWMTBOMO00796	-0.063	0.032	-1.047	3.49e-01	0.631	-7.214	L5D6_OR_VS_L5D6_Ctr	noSig	NA
797	KWMTBOMO00797	0.046	0.023	1.047	3.49e-01	0.631	-7.214	L5D6_OR_VS_L5D6_Ctr	noSig	NA
798	KWMTBOMO00798	-0.014	0.012	-0.756	4.88e-01	0.8	-7.485	L5D6_OR_VS_L5D6_Ctr	noSig	LOC105842558
799	KWMTBOMO00799	0.48	0.738	3.394	2.37e-02	0.108	-4.355	L5D6_OR_VS_L5D6_Ctr	noSig	LOC101744534
800	KWMTBOMO00800	0.001	0.534	0.005	9.96e-01	1	-7.814	L5D6_OR_VS_L5D6_Ctr	noSig	LOC101744680
801	KWMTBOMO00801	-0.121	1.98	-0.616	5.68e-01	0.894	-7.591	L5D6_OR_VS_L5D6_Ctr	noSig	LOC101744105
802	KWMTBOMO00802	0	0	0	1.00e+00	1	-7.814	L5D6_OR_VS_L5D6_Ctr	noSig	LOC101744246
803	KWMTBOMO00803	0.01	0.07	0.264	8.04e-01	1	-7.771	L5D6_OR_VS_L5D6_Ctr	noSig	LOC101744821
804	KWMTBOMO00804	0	0	0	1.00e+00	1	-7.814	L5D6_OR_VS_L5D6_Ctr	noSig	NA
805	KWMTBOMO00805	0	0	0	1.00e+00	1	-7.814	L5D6_OR_VS_L5D6_Ctr	noSig	LOC101744389
806	KWMTBOMO00806	0	0	0	1.00e+00	1	-7.814	L5D6_OR_VS_L5D6_Ctr	noSig	NA
807	KWMTBOMO00807	0	0	0	1.00e+00	1	-7.814	L5D6_OR_VS_L5D6_Ctr	noSig	LOC101744533
808	KWMTBOMO00808	0	0	0	1.00e+00	1	-7.814	L5D6_OR_VS_L5D6_Ctr	noSig	LOC101744965
809	KWMTBOMO00809	-0.03	0.056	-0.38	7.22e-01	1	-7.727	L5D6_OR_VS_L5D6_Ctr	noSig	NA
810	KWMTBOMO00810	0.058	0.216	0.553	6.07e-01	0.936	-7.633	L5D6_OR_VS_L5D6_Ctr	noSig	NA
811	KWMTBOMO00811	0	0	0	1.00e+00	1	-7.814	L5D6_OR_VS_L5D6_Ctr	noSig	NA
812	KWMTBOMO00812	0	0	0	1.00e+00	1	-7.814	L5D6_OR_VS_L5D6_Ctr	noSig	NA
813	KWMTBOMO00813	-0.459	2.839	-2.696	4.92e-02	0.186	-5.189	L5D6_OR_VS_L5D6_Ctr	noSig	LOC101744679
814	KWMTBOMO00814	-0.149	2.706	-0.835	4.47e-01	0.75	-7.417	L5D6_OR_VS_L5D6_Ctr	noSig	NA
815	KWMTBOMO00815	-0.005	0.117	-0.111	9.17e-01	1	-7.806	L5D6_OR_VS_L5D6_Ctr	noSig	NA
816	KWMTBOMO00816	-0.214	0.145	-3.176	2.96e-02	0.127	-4.608	L5D6_OR_VS_L5D6_Ctr	noSig	LOC105841751
817	KWMTBOMO00817	-0.224	0.14	-3.228	2.80e-02	0.122	-4.547	L5D6_OR_VS_L5D6_Ctr	noSig	NA
818	KWMTBOMO00818	-0.033	0.016	-1.047	3.49e-01	0.631	-7.214	L5D6_OR_VS_L5D6_Ctr	noSig	LOC105842874
819	KWMTBOMO00819	-0.005	0.007	-0.461	6.67e-01	0.997	-7.686	L5D6_OR_VS_L5D6_Ctr	noSig	LOC101735948
820	KWMTBOMO00820	-0.023	0.17	-0.238	8.23e-01	1	-7.779	L5D6_OR_VS_L5D6_Ctr	noSig	LOC105842585
821	KWMTBOMO00821	0.024	0.012	1.968	1.14e-01	0.333	-6.112	L5D6_OR_VS_L5D6_Ctr	noSig	LOC101739604
822	KWMTBOMO00822	0	0	0	1.00e+00	1	-7.814	L5D6_OR_VS_L5D6_Ctr	noSig	LOC101745115
823	KWMTBOMO00823	0	0	0	1.00e+00	1	-7.814	L5D6_OR_VS_L5D6_Ctr	noSig	LOC101744964
824	KWMTBOMO00824	0	0	0	1.00e+00	1	-7.814	L5D6_OR_VS_L5D6_Ctr	noSig	LOC101745114
825	KWMTBOMO00825	0	0	0	1.00e+00	1	-7.814	L5D6_OR_VS_L5D6_Ctr	noSig	NA
826	KWMTBOMO00826	0.037	0.019	1.047	3.49e-01	0.631	-7.214	L5D6_OR_VS_L5D6_Ctr	noSig	LOC101745264
827	KWMTBOMO00827	0.037	0.019	1.047	3.49e-01	0.631	-7.214	L5D6_OR_VS_L5D6_Ctr	noSig	LOC101745637
828	KWMTBOMO00828	-0.092	0.046	-1.048	3.49e-01	0.631	-7.213	L5D6_OR_VS_L5D6_Ctr	noSig	LOC101745786
829	KWMTBOMO00829	0.109	0.268	0.574	5.94e-01	0.922	-7.619	L5D6_OR_VS_L5D6_Ctr	noSig	Hr3
830	KWMTBOMO00830	0.019	0.009	1.044	3.50e-01	0.631	-7.217	L5D6_OR_VS_L5D6_Ctr	noSig	LOC100037421
831	KWMTBOMO00831	0	0	0	1.00e+00	1	-7.814	L5D6_OR_VS_L5D6_Ctr	noSig	NA
832	KWMTBOMO00832	0	0	0	1.00e+00	1	-7.814	L5D6_OR_VS_L5D6_Ctr	noSig	NA
833	KWMTBOMO00833	-0.135	3.543	-0.962	3.86e-01	0.671	-7.299	L5D6_OR_VS_L5D6_Ctr	noSig	LOC101745407
834	KWMTBOMO00834	-0.624	1.071	-6.355	2.28e-03	0.0215	-1.594	L5D6_OR_VS_L5D6_Ctr	down	LOC101746268
835	KWMTBOMO00835	0	0	0	1.00e+00	1	-7.814	L5D6_OR_VS_L5D6_Ctr	noSig	LOC110385147
836	KWMTBOMO00836	-0.41	2.438	-2.37	7.11e-02	0.243	-5.598	L5D6_OR_VS_L5D6_Ctr	noSig	LOC101745695
837	KWMTBOMO00837	0.365	6.315	5.329	4.57e-03	0.034	-2.422	L5D6_OR_VS_L5D6_Ctr	noSig	LOC101746822
838	KWMTBOMO00838	0.838	12.179	17.755	2.95e-05	0.00237	3.45	L5D6_OR_VS_L5D6_Ctr	up	RpL23
839	KWMTBOMO00839	0.546	2.676	2.283	7.86e-02	0.261	-5.709	L5D6_OR_VS_L5D6_Ctr	noSig	NA
840	KWMTBOMO00840	0.15	0.589	0.558	6.04e-01	0.933	-7.63	L5D6_OR_VS_L5D6_Ctr	noSig	LOC101745843
841	KWMTBOMO00841	0.088	0.044	3.689	1.78e-02	0.0876	-4.024	L5D6_OR_VS_L5D6_Ctr	noSig	LOC101735440
842	KWMTBOMO00842	-0.069	2.224	-0.31	7.70e-01	1	-7.755	L5D6_OR_VS_L5D6_Ctr	noSig	LOC101741327
843	KWMTBOMO00843	-1.244	1.903	-5.616	3.73e-03	0.0297	-2.179	L5D6_OR_VS_L5D6_Ctr	down	LOC101746269
844	KWMTBOMO00844	0.024	1.066	0.115	9.13e-01	1	-7.806	L5D6_OR_VS_L5D6_Ctr	noSig	LOC101735576
845	KWMTBOMO00845	0	0	0	1.00e+00	1	-7.814	L5D6_OR_VS_L5D6_Ctr	noSig	NA
846	KWMTBOMO00846	0	0	0	1.00e+00	1	-7.814	L5D6_OR_VS_L5D6_Ctr	noSig	NA
847	KWMTBOMO00847	0.014	0.007	1.042	3.51e-01	0.631	-7.219	L5D6_OR_VS_L5D6_Ctr	noSig	NA
848	KWMTBOMO00848	0	0	0	1.00e+00	1	-7.814	L5D6_OR_VS_L5D6_Ctr	noSig	LOC101735715
849	KWMTBOMO00849	0	0	0	1.00e+00	1	-7.814	L5D6_OR_VS_L5D6_Ctr	noSig	NA
850	KWMTBOMO00850	0	0	0	1.00e+00	1	-7.814	L5D6_OR_VS_L5D6_Ctr	noSig	LOC101746546
851	KWMTBOMO00851	0	0	0	1.00e+00	1	-7.814	L5D6_OR_VS_L5D6_Ctr	noSig	NA
852	KWMTBOMO00852	0	0	0	1.00e+00	1	-7.814	L5D6_OR_VS_L5D6_Ctr	noSig	LOC101735849
853	KWMTBOMO00853	-0.225	6.231	-2.123	9.49e-02	0.3	-5.915	L5D6_OR_VS_L5D6_Ctr	noSig	LOC101735535
854	KWMTBOMO00854	-0.325	0.554	-2.142	9.28e-02	0.295	-5.891	L5D6_OR_VS_L5D6_Ctr	noSig	LOC101746683
855	KWMTBOMO00855	-0.152	0.217	-0.491	6.47e-01	0.977	-7.67	L5D6_OR_VS_L5D6_Ctr	noSig	LOC105842979
856	KWMTBOMO00856	0	0	0	1.00e+00	1	-7.814	L5D6_OR_VS_L5D6_Ctr	noSig	LOC105842574
857	KWMTBOMO00857	-0.092	0.046	-1.048	3.49e-01	0.631	-7.213	L5D6_OR_VS_L5D6_Ctr	noSig	LOC101736212
858	KWMTBOMO00858	-1.516	1.124	-7.403	1.22e-03	0.0145	-0.856	L5D6_OR_VS_L5D6_Ctr	down	LOC110385140
859	KWMTBOMO00859	0	0	0	1.00e+00	1	-7.814	L5D6_OR_VS_L5D6_Ctr	noSig	NA
860	KWMTBOMO00860	0.719	5.478	4.842	6.62e-03	0.0437	-2.859	L5D6_OR_VS_L5D6_Ctr	up	COPZ
861	KWMTBOMO00861	1.292	2.488	7.748	1.01e-03	0.0131	-0.632	L5D6_OR_VS_L5D6_Ctr	up	LOC733129
862	KWMTBOMO00862	-0.303	3.418	-2.235	8.31e-02	0.272	-5.771	L5D6_OR_VS_L5D6_Ctr	noSig	NA
863	KWMTBOMO00863	-0.102	0.125	-0.941	3.95e-01	0.684	-7.319	L5D6_OR_VS_L5D6_Ctr	noSig	NA
864	KWMTBOMO00864	0	0	0	1.00e+00	1	-7.814	L5D6_OR_VS_L5D6_Ctr	noSig	NA
865	KWMTBOMO00865	0	0	0	1.00e+00	1	-7.814	L5D6_OR_VS_L5D6_Ctr	noSig	NA
866	KWMTBOMO00866	-0.14	0.075	-3.508	2.12e-02	0.0992	-4.226	L5D6_OR_VS_L5D6_Ctr	noSig	LOC110385666
867	KWMTBOMO00867	0	0	0	1.00e+00	1	-7.814	L5D6_OR_VS_L5D6_Ctr	noSig	LOC101736342
868	KWMTBOMO00868	-0.023	0.136	-0.218	8.37e-01	1	-7.785	L5D6_OR_VS_L5D6_Ctr	noSig	LOC101736464
869	KWMTBOMO00869	0.014	0.007	1.042	3.51e-01	0.631	-7.219	L5D6_OR_VS_L5D6_Ctr	noSig	LOC101736595
870	KWMTBOMO00870	0	0	0	1.00e+00	1	-7.814	L5D6_OR_VS_L5D6_Ctr	noSig	NA
871	KWMTBOMO00871	0	0	0	1.00e+00	1	-7.814	L5D6_OR_VS_L5D6_Ctr	noSig	NA
872	KWMTBOMO00872	0	0	0	1.00e+00	1	-7.814	L5D6_OR_VS_L5D6_Ctr	noSig	Ci-13
873	KWMTBOMO00873	0	0	0	1.00e+00	1	-7.814	L5D6_OR_VS_L5D6_Ctr	noSig	NA
874	KWMTBOMO00874	-0.763	0.651	-6.841	1.69e-03	0.0178	-1.239	L5D6_OR_VS_L5D6_Ctr	down	LOC733136
875	KWMTBOMO00875	-0.489	1.396	-1.843	1.33e-01	0.37	-6.273	L5D6_OR_VS_L5D6_Ctr	noSig	NA
876	KWMTBOMO00876	-0.346	0.391	-1.926	1.20e-01	0.346	-6.167	L5D6_OR_VS_L5D6_Ctr	noSig	LOC101747094
877	KWMTBOMO00877	0.059	0.452	0.387	7.17e-01	1	-7.724	L5D6_OR_VS_L5D6_Ctr	noSig	NA
878	KWMTBOMO00878	0	0	0	1.00e+00	1	-7.814	L5D6_OR_VS_L5D6_Ctr	noSig	LOC105842577
879	KWMTBOMO00879	0.092	0.046	1.048	3.49e-01	0.631	-7.213	L5D6_OR_VS_L5D6_Ctr	noSig	LOC101736997
880	KWMTBOMO00880	0	0	0	1.00e+00	1	-7.814	L5D6_OR_VS_L5D6_Ctr	noSig	NA
881	KWMTBOMO00881	0.634	5.397	4.788	6.90e-03	0.045	-2.909	L5D6_OR_VS_L5D6_Ctr	up	ced-6
882	KWMTBOMO00882	0.046	0.21	0.324	7.61e-01	1	-7.75	L5D6_OR_VS_L5D6_Ctr	noSig	LOC101737272
883	KWMTBOMO00883	-0.629	3.651	-7.341	1.27e-03	0.0149	-0.896	L5D6_OR_VS_L5D6_Ctr	down	LOC101747230
884	KWMTBOMO00884	0.291	3.074	1.754	1.48e-01	0.398	-6.386	L5D6_OR_VS_L5D6_Ctr	noSig	LOC101737415
885	KWMTBOMO00885	0.782	2.371	2.023	1.07e-01	0.318	-6.043	L5D6_OR_VS_L5D6_Ctr	noSig	NA
886	KWMTBOMO00886	-2.114	3.132	-19.165	2.12e-05	0.00218	3.811	L5D6_OR_VS_L5D6_Ctr	down	LOC101735441
887	KWMTBOMO00887	-0.155	0.143	-1.737	1.51e-01	0.404	-6.407	L5D6_OR_VS_L5D6_Ctr	noSig	NA
888	KWMTBOMO00888	-0.974	1.485	-2.259	8.09e-02	0.267	-5.741	L5D6_OR_VS_L5D6_Ctr	noSig	NA
889	KWMTBOMO00889	-0.499	1.685	-7.078	1.47e-03	0.0162	-1.074	L5D6_OR_VS_L5D6_Ctr	noSig	LOC101737750
890	KWMTBOMO00890	-0.103	1.332	-0.581	5.90e-01	0.918	-7.615	L5D6_OR_VS_L5D6_Ctr	noSig	LOC101737886
891	KWMTBOMO00891	0	0.278	0.003	9.98e-01	1	-7.814	L5D6_OR_VS_L5D6_Ctr	noSig	TDRD12
892	KWMTBOMO00892	0.018	0.208	0.143	8.92e-01	1	-7.801	L5D6_OR_VS_L5D6_Ctr	noSig	CPH2
893	KWMTBOMO00893	-0.392	2.039	-2.089	9.87e-02	0.304	-5.958	L5D6_OR_VS_L5D6_Ctr	noSig	LOC110384750
894	KWMTBOMO00894	-0.1	0.05	-1.048	3.49e-01	0.631	-7.213	L5D6_OR_VS_L5D6_Ctr	noSig	NA
895	KWMTBOMO00895	-0.097	0.207	-0.394	7.12e-01	1	-7.72	L5D6_OR_VS_L5D6_Ctr	noSig	CPFL1
896	KWMTBOMO00896	-0.063	0.123	-0.368	7.30e-01	1	-7.732	L5D6_OR_VS_L5D6_Ctr	noSig	CPH3
897	KWMTBOMO00897	2.756	1.53	17.18	3.41e-05	0.00244	3.293	L5D6_OR_VS_L5D6_Ctr	up	CPH4
898	KWMTBOMO00898	-0.209	1.552	-1.014	3.63e-01	0.643	-7.248	L5D6_OR_VS_L5D6_Ctr	noSig	LOC101735716
899	KWMTBOMO00899	0	0	0	1.00e+00	1	-7.814	L5D6_OR_VS_L5D6_Ctr	noSig	LOC101735850
900	KWMTBOMO00900	-0.18	0.136	-1.548	1.90e-01	0.478	-6.643	L5D6_OR_VS_L5D6_Ctr	noSig	LOC101738020
901	KWMTBOMO00901	-0.456	2.471	-1.416	2.24e-01	0.535	-6.802	L5D6_OR_VS_L5D6_Ctr	noSig	NA
902	KWMTBOMO00902	-1.313	4.547	-15.791	4.91e-05	0.00288	2.887	L5D6_OR_VS_L5D6_Ctr	down	LOC101735982
903	KWMTBOMO00903	0.235	0.117	1.048	3.49e-01	0.631	-7.213	L5D6_OR_VS_L5D6_Ctr	noSig	SIFa
904	KWMTBOMO00904	0.961	1.227	1.922	1.21e-01	0.346	-6.172	L5D6_OR_VS_L5D6_Ctr	noSig	IMFa
905	KWMTBOMO00905	0.135	2.835	0.838	4.45e-01	0.748	-7.414	L5D6_OR_VS_L5D6_Ctr	noSig	LOC101736113
906	KWMTBOMO00906	-0.028	2.769	-0.169	8.74e-01	1	-7.796	L5D6_OR_VS_L5D6_Ctr	noSig	NA
907	KWMTBOMO00907	0.017	2.674	0.202	8.49e-01	1	-7.789	L5D6_OR_VS_L5D6_Ctr	noSig	NA
908	KWMTBOMO00908	-0.032	0.04	-1.101	3.28e-01	0.631	-7.158	L5D6_OR_VS_L5D6_Ctr	noSig	NA
909	KWMTBOMO00909	0	0	0	1.00e+00	1	-7.814	L5D6_OR_VS_L5D6_Ctr	noSig	NA
910	KWMTBOMO00910	-0.43	2.196	-2.36	7.19e-02	0.245	-5.611	L5D6_OR_VS_L5D6_Ctr	noSig	LOC101738281
911	KWMTBOMO00911	0.093	0.114	1.007	3.66e-01	0.647	-7.254	L5D6_OR_VS_L5D6_Ctr	noSig	LOC101738418
912	KWMTBOMO00912	0.15	0.075	1.893	1.25e-01	0.355	-6.209	L5D6_OR_VS_L5D6_Ctr	noSig	NA
913	KWMTBOMO00913	-0.501	2.063	-7.193	1.38e-03	0.0155	-0.996	L5D6_OR_VS_L5D6_Ctr	down	LOC101738552
914	KWMTBOMO00914	0	0	0	1.00e+00	1	-7.814	L5D6_OR_VS_L5D6_Ctr	noSig	LOC101736247
915	KWMTBOMO00915	0.507	0.653	3.697	1.77e-02	0.0872	-4.015	L5D6_OR_VS_L5D6_Ctr	noSig	Galpha73b
916	KWMTBOMO00916	0	0	0	1.00e+00	1	-7.814	L5D6_OR_VS_L5D6_Ctr	noSig	LOC101735384
917	KWMTBOMO00917	0.157	5.552	1.146	3.10e-01	0.631	-7.11	L5D6_OR_VS_L5D6_Ctr	noSig	NA
918	KWMTBOMO00918	-0.03	0.17	-0.158	8.82e-01	1	-7.799	L5D6_OR_VS_L5D6_Ctr	noSig	NA
919	KWMTBOMO00919	0.237	3.833	1.445	2.16e-01	0.521	-6.767	L5D6_OR_VS_L5D6_Ctr	noSig	UGT33R1
920	KWMTBOMO00920	-0.078	0.979	-0.368	7.30e-01	1	-7.732	L5D6_OR_VS_L5D6_Ctr	noSig	LOC105842582
921	KWMTBOMO00921	1.891	1.976	3.4	2.36e-02	0.107	-4.348	L5D6_OR_VS_L5D6_Ctr	noSig	NA
922	KWMTBOMO00922	-0.192	6.256	-1.181	2.98e-01	0.631	-7.071	L5D6_OR_VS_L5D6_Ctr	noSig	Cbp
923	KWMTBOMO00923	0.192	0.096	5.791	3.30e-03	0.0277	-2.035	L5D6_OR_VS_L5D6_Ctr	noSig	LOC692942
924	KWMTBOMO00924	0.603	1.804	3.334	2.52e-02	0.113	-4.424	L5D6_OR_VS_L5D6_Ctr	noSig	LOC101736380
925	KWMTBOMO00925	0	0	0	1.00e+00	1	-7.814	L5D6_OR_VS_L5D6_Ctr	noSig	LOC101739373
926	KWMTBOMO00926	0	0	0	1.00e+00	1	-7.814	L5D6_OR_VS_L5D6_Ctr	noSig	NA
927	KWMTBOMO00927	-0.4	3.276	-2.46	6.41e-02	0.225	-5.485	L5D6_OR_VS_L5D6_Ctr	noSig	LOC101739619
928	KWMTBOMO00928	0.186	2.245	1.251	2.74e-01	0.62	-6.994	L5D6_OR_VS_L5D6_Ctr	noSig	LOC101736347
929	KWMTBOMO00929	-0.147	0.115	-0.962	3.86e-01	0.671	-7.299	L5D6_OR_VS_L5D6_Ctr	noSig	NA
930	KWMTBOMO00930	-0.164	2.594	-1.326	2.50e-01	0.58	-6.908	L5D6_OR_VS_L5D6_Ctr	noSig	LOC101739762
931	KWMTBOMO00931	0	0	0	1.00e+00	1	-7.814	L5D6_OR_VS_L5D6_Ctr	noSig	LOC101739896
932	KWMTBOMO00932	-0.144	0.072	-1.048	3.49e-01	0.631	-7.213	L5D6_OR_VS_L5D6_Ctr	noSig	NA
933	KWMTBOMO00933	-0.246	0.245	-3.232	2.79e-02	0.121	-4.542	L5D6_OR_VS_L5D6_Ctr	noSig	LOC110385217
934	KWMTBOMO00934	0	0	0	1.00e+00	1	-7.814	L5D6_OR_VS_L5D6_Ctr	noSig	NA
935	KWMTBOMO00935	0	0	0	1.00e+00	1	-7.814	L5D6_OR_VS_L5D6_Ctr	noSig	NA
936	KWMTBOMO00936	-0.061	0.081	-0.524	6.26e-01	0.956	-7.651	L5D6_OR_VS_L5D6_Ctr	noSig	Inv
937	KWMTBOMO00937	0	0	0	1.00e+00	1	-7.814	L5D6_OR_VS_L5D6_Ctr	noSig	LOC105842576
938	KWMTBOMO00938	0.067	1.88	0.292	7.84e-01	1	-7.762	L5D6_OR_VS_L5D6_Ctr	noSig	LOC101740161
939	KWMTBOMO00939	0	0	0	1.00e+00	1	-7.814	L5D6_OR_VS_L5D6_Ctr	noSig	LOC101740031
940	KWMTBOMO00940	0.645	0.322	7.423	1.21e-03	0.0145	-0.842	L5D6_OR_VS_L5D6_Ctr	up	LOC101740752
941	KWMTBOMO00941	0.033	0.016	1.047	3.49e-01	0.631	-7.214	L5D6_OR_VS_L5D6_Ctr	noSig	LOC101740522
942	KWMTBOMO00942	-0.077	1.687	-0.755	4.89e-01	0.8	-7.485	L5D6_OR_VS_L5D6_Ctr	noSig	LOC101740389
943	KWMTBOMO00943	-0.46	0.469	-1.404	2.27e-01	0.54	-6.816	L5D6_OR_VS_L5D6_Ctr	noSig	LOC101736637
944	KWMTBOMO00944	0.445	0.793	0.715	5.11e-01	0.828	-7.518	L5D6_OR_VS_L5D6_Ctr	noSig	LOC101740894
945	KWMTBOMO00945	0	0	0	1.00e+00	1	-7.814	L5D6_OR_VS_L5D6_Ctr	noSig	LOC101741035
946	KWMTBOMO00946	0	0	0	1.00e+00	1	-7.814	L5D6_OR_VS_L5D6_Ctr	noSig	NPF2
947	KWMTBOMO00947	0	0	0	1.00e+00	1	-7.814	L5D6_OR_VS_L5D6_Ctr	noSig	LOC105842586
948	KWMTBOMO00948	-0.191	2.046	-0.813	4.58e-01	0.764	-7.436	L5D6_OR_VS_L5D6_Ctr	noSig	LOC101741323
949	KWMTBOMO00949	-0.533	1.334	-1.331	2.48e-01	0.577	-6.902	L5D6_OR_VS_L5D6_Ctr	noSig	NA
950	KWMTBOMO00950	-0.304	3.674	-1.683	1.61e-01	0.425	-6.474	L5D6_OR_VS_L5D6_Ctr	noSig	LOC101741550
951	KWMTBOMO00951	0.059	0.029	1.047	3.49e-01	0.631	-7.214	L5D6_OR_VS_L5D6_Ctr	noSig	LOC101741935
952	KWMTBOMO00952	-1.272	4.61	-7.582	1.11e-03	0.0138	-0.738	L5D6_OR_VS_L5D6_Ctr	down	LOC101741786
953	KWMTBOMO00953	-1.051	3.365	-5.574	3.84e-03	0.0304	-2.213	L5D6_OR_VS_L5D6_Ctr	down	LOC101736907
954	KWMTBOMO00954	1.574	1.808	11.641	1.82e-04	0.00517	1.387	L5D6_OR_VS_L5D6_Ctr	up	LOC101737039
955	KWMTBOMO00955	0.014	0.021	1.273	2.66e-01	0.608	-6.969	L5D6_OR_VS_L5D6_Ctr	noSig	LOC101737466
956	KWMTBOMO00956	0.028	0.051	0.596	5.80e-01	0.907	-7.604	L5D6_OR_VS_L5D6_Ctr	noSig	NA
957	KWMTBOMO00957	0	0	0	1.00e+00	1	-7.814	L5D6_OR_VS_L5D6_Ctr	noSig	NA
958	KWMTBOMO00958	0	0	0	1.00e+00	1	-7.814	L5D6_OR_VS_L5D6_Ctr	noSig	NA
959	KWMTBOMO00959	0	0	0	1.00e+00	1	-7.814	L5D6_OR_VS_L5D6_Ctr	noSig	NA
960	KWMTBOMO00960	0	0	0	1.00e+00	1	-7.814	L5D6_OR_VS_L5D6_Ctr	noSig	NA
961	KWMTBOMO00961	0	0	0	1.00e+00	1	-7.814	L5D6_OR_VS_L5D6_Ctr	noSig	LOC101742237
962	KWMTBOMO00962	-0.019	0.009	-1.044	3.50e-01	0.631	-7.217	L5D6_OR_VS_L5D6_Ctr	noSig	LOC101746904
963	KWMTBOMO00963	0	0	0	1.00e+00	1	-7.814	L5D6_OR_VS_L5D6_Ctr	noSig	NA
964	KWMTBOMO00964	0	0	0	1.00e+00	1	-7.814	L5D6_OR_VS_L5D6_Ctr	noSig	LOC101747037
965	KWMTBOMO00965	-0.618	2.717	-4.41	9.39e-03	0.0557	-3.272	L5D6_OR_VS_L5D6_Ctr	noSig	LOC101746764
966	KWMTBOMO00966	0	0	0	1.00e+00	1	-7.814	L5D6_OR_VS_L5D6_Ctr	noSig	NA
967	KWMTBOMO00967	-0.431	0.317	-3.806	1.60e-02	0.0809	-3.897	L5D6_OR_VS_L5D6_Ctr	noSig	LOC101745266
968	KWMTBOMO00968	0	0	0	1.00e+00	1	-7.814	L5D6_OR_VS_L5D6_Ctr	noSig	LOC101745133
969	KWMTBOMO00969	-2.441	1.649	-10.21	3.19e-04	0.00685	0.734	L5D6_OR_VS_L5D6_Ctr	down	NA
970	KWMTBOMO00970	-0.104	0.071	-0.876	4.26e-01	0.725	-7.38	L5D6_OR_VS_L5D6_Ctr	noSig	NA
971	KWMTBOMO00971	0.209	9.07	1.857	1.30e-01	0.366	-6.255	L5D6_OR_VS_L5D6_Ctr	noSig	LOC101742284
972	KWMTBOMO00972	-1.042	1.076	-4.833	6.66e-03	0.0439	-2.867	L5D6_OR_VS_L5D6_Ctr	down	LOC101742430
973	KWMTBOMO00973	-0.6	14.122	-7.572	1.11e-03	0.0138	-0.745	L5D6_OR_VS_L5D6_Ctr	down	LOC101743716
974	KWMTBOMO00974	1.211	11.723	27.02	4.74e-06	0.00129	5.35	L5D6_OR_VS_L5D6_Ctr	up	RpS21
975	KWMTBOMO00975	0.14	1.008	1.876	1.27e-01	0.36	-6.23	L5D6_OR_VS_L5D6_Ctr	noSig	LOC101736617
976	KWMTBOMO00976	0	0	0	1.00e+00	1	-7.814	L5D6_OR_VS_L5D6_Ctr	noSig	NA
977	KWMTBOMO00977	-0.62	4.747	-3.813	1.59e-02	0.0805	-3.89	L5D6_OR_VS_L5D6_Ctr	noSig	NA
978	KWMTBOMO00978	0.048	3.478	0.438	6.82e-01	1	-7.699	L5D6_OR_VS_L5D6_Ctr	noSig	LOC101736762
979	KWMTBOMO00979	-0.477	3.154	-3.073	3.29e-02	0.137	-4.73	L5D6_OR_VS_L5D6_Ctr	noSig	LOC101746290
980	KWMTBOMO00980	-0.406	1.133	-2.824	4.28e-02	0.167	-5.031	L5D6_OR_VS_L5D6_Ctr	noSig	LOC101736888
981	KWMTBOMO00981	0.012	0.143	0.083	9.38e-01	1	-7.809	L5D6_OR_VS_L5D6_Ctr	noSig	LOC101746426
982	KWMTBOMO00982	1.15	5.123	9.232	4.87e-04	0.0087	0.233	L5D6_OR_VS_L5D6_Ctr	up	LOC101737155
983	KWMTBOMO00983	0.05	0.025	1.047	3.49e-01	0.631	-7.214	L5D6_OR_VS_L5D6_Ctr	noSig	LOC101737300
984	KWMTBOMO00984	-0.063	0.032	-1.047	3.49e-01	0.631	-7.214	L5D6_OR_VS_L5D6_Ctr	noSig	LOC101746566
985	KWMTBOMO00985	0.011	0.52	0.043	9.68e-01	1	-7.813	L5D6_OR_VS_L5D6_Ctr	noSig	LOC101746802
986	KWMTBOMO00986	0.019	0.009	1.044	3.50e-01	0.631	-7.217	L5D6_OR_VS_L5D6_Ctr	noSig	LOC101746943
987	KWMTBOMO00987	0	0	0	1.00e+00	1	-7.814	L5D6_OR_VS_L5D6_Ctr	noSig	LOC101747076
988	KWMTBOMO00988	-0.378	2.488	-2.727	4.76e-02	0.181	-5.15	L5D6_OR_VS_L5D6_Ctr	noSig	NA
989	KWMTBOMO00989	-0.611	3.141	-7.271	1.32e-03	0.0152	-0.943	L5D6_OR_VS_L5D6_Ctr	down	LOC101737442
990	KWMTBOMO00990	-1.187	1.552	-9.041	5.32e-04	0.00912	0.13	L5D6_OR_VS_L5D6_Ctr	down	LOC101735380
991	KWMTBOMO00991	0	0	0	1.00e+00	1	-7.814	L5D6_OR_VS_L5D6_Ctr	noSig	LOC101735509
992	KWMTBOMO00992	0.206	0.883	1.835	1.34e-01	0.372	-6.282	L5D6_OR_VS_L5D6_Ctr	noSig	LOC100862750
993	KWMTBOMO00993	0	0	0	1.00e+00	1	-7.814	L5D6_OR_VS_L5D6_Ctr	noSig	LOC101737583
994	KWMTBOMO00994	-1.274	5.486	-9.456	4.41e-04	0.00825	0.353	L5D6_OR_VS_L5D6_Ctr	down	LOC101735745
995	KWMTBOMO00995	-0.458	1.231	-2.384	6.99e-02	0.24	-5.58	L5D6_OR_VS_L5D6_Ctr	noSig	LOC101735876
996	KWMTBOMO00996	-0.038	0.056	-0.48	6.54e-01	0.985	-7.676	L5D6_OR_VS_L5D6_Ctr	noSig	NA
997	KWMTBOMO00997	0	0	0	1.00e+00	1	-7.814	L5D6_OR_VS_L5D6_Ctr	noSig	LOC101736094
998	KWMTBOMO00998	-0.126	0.063	-1.048	3.49e-01	0.631	-7.213	L5D6_OR_VS_L5D6_Ctr	noSig	NA
999	KWMTBOMO00999	0.951	3.726	5.276	4.75e-03	0.0348	-2.468	L5D6_OR_VS_L5D6_Ctr	up	LOC101736228
1000	KWMTBOMO01000	-1.934	2.669	-6.115	2.66e-03	0.0239	-1.778	L5D6_OR_VS_L5D6_Ctr	down	LOC101737726
1001	KWMTBOMO01001	-0.613	15.458	-15.351	5.54e-05	0.00308	2.749	L5D6_OR_VS_L5D6_Ctr	down	P25
1002	KWMTBOMO01002	-1.258	2.259	-19.72	1.87e-05	0.00212	3.945	L5D6_OR_VS_L5D6_Ctr	down	LOC101737862
1003	KWMTBOMO01003	-0.55	4.476	-3.404	2.35e-02	0.107	-4.343	L5D6_OR_VS_L5D6_Ctr	noSig	LOC110385295
1004	KWMTBOMO01004	-1.131	4.777	-12.885	1.18e-04	0.00424	1.89	L5D6_OR_VS_L5D6_Ctr	down	LOC105841715
1005	KWMTBOMO01005	0.005	0.031	0.205	8.47e-01	1	-7.788	L5D6_OR_VS_L5D6_Ctr	noSig	LOC101736358
1006	KWMTBOMO01006	-0.08	1.225	-0.286	7.88e-01	1	-7.764	L5D6_OR_VS_L5D6_Ctr	noSig	LOC101736478
1007	KWMTBOMO01007	-0.706	2.83	-4.23	1.09e-02	0.0624	-3.453	L5D6_OR_VS_L5D6_Ctr	noSig	LOC100316860
1008	KWMTBOMO01008	-0.113	0.441	-0.855	4.37e-01	0.738	-7.399	L5D6_OR_VS_L5D6_Ctr	noSig	LOC101736913
1009	KWMTBOMO01009	-0.093	0.265	-0.607	5.74e-01	0.9	-7.597	L5D6_OR_VS_L5D6_Ctr	noSig	LOC101738867
1010	KWMTBOMO01010	0.251	0.237	2.231	8.36e-02	0.273	-5.777	L5D6_OR_VS_L5D6_Ctr	noSig	NA
1011	KWMTBOMO01011	0.037	0.019	1.047	3.49e-01	0.631	-7.214	L5D6_OR_VS_L5D6_Ctr	noSig	LOC101738727
1012	KWMTBOMO01012	0.01	0.005	1.035	3.54e-01	0.631	-7.226	L5D6_OR_VS_L5D6_Ctr	noSig	NA
1013	KWMTBOMO01013	0	0	0	1.00e+00	1	-7.814	L5D6_OR_VS_L5D6_Ctr	noSig	NA
1014	KWMTBOMO01014	0	0	0	1.00e+00	1	-7.814	L5D6_OR_VS_L5D6_Ctr	noSig	NA
1015	KWMTBOMO01015	-0.126	0.063	-1.048	3.49e-01	0.631	-7.213	L5D6_OR_VS_L5D6_Ctr	noSig	NA
1016	KWMTBOMO01016	0.35	0.175	2.304	7.67e-02	0.256	-5.682	L5D6_OR_VS_L5D6_Ctr	noSig	LOC101745514
1017	KWMTBOMO01017	-0.29	0.394	-2.039	1.05e-01	0.314	-6.022	L5D6_OR_VS_L5D6_Ctr	noSig	NA
1018	KWMTBOMO01018	-0.615	3.275	-4.786	6.91e-03	0.045	-2.911	L5D6_OR_VS_L5D6_Ctr	down	LOC101745658
1019	KWMTBOMO01019	-0.7	3.877	-4.686	7.49e-03	0.0477	-3.005	L5D6_OR_VS_L5D6_Ctr	down	LOC101745949
1020	KWMTBOMO01020	-0.913	3.07	-7.522	1.14e-03	0.014	-0.777	L5D6_OR_VS_L5D6_Ctr	down	RMI1
1021	KWMTBOMO01021	0.203	1.33	2.43	6.64e-02	0.231	-5.523	L5D6_OR_VS_L5D6_Ctr	noSig	LOC101746093
1022	KWMTBOMO01022	-0.013	2.933	-0.042	9.68e-01	1	-7.813	L5D6_OR_VS_L5D6_Ctr	noSig	LOC101738199
1023	KWMTBOMO01023	0.277	1.033	1.595	1.80e-01	0.459	-6.584	L5D6_OR_VS_L5D6_Ctr	noSig	NA
1024	KWMTBOMO01024	0.25	0.465	0.91	4.10e-01	0.703	-7.348	L5D6_OR_VS_L5D6_Ctr	noSig	LOC101736238
1025	KWMTBOMO01025	-0.156	0.111	-4.315	1.02e-02	0.0593	-3.367	L5D6_OR_VS_L5D6_Ctr	noSig	NA
1026	KWMTBOMO01026	0	0	0	1.00e+00	1	-7.814	L5D6_OR_VS_L5D6_Ctr	noSig	LOC101738215
1027	KWMTBOMO01027	0.052	0.409	0.411	7.01e-01	1	-7.712	L5D6_OR_VS_L5D6_Ctr	noSig	LOC101746237
1028	KWMTBOMO01028	0	0	0	1.00e+00	1	-7.814	L5D6_OR_VS_L5D6_Ctr	noSig	Or-35
1029	KWMTBOMO01029	0	0	0	1.00e+00	1	-7.814	L5D6_OR_VS_L5D6_Ctr	noSig	LOC101738432
1030	KWMTBOMO01030	0.013	0.445	0.126	9.05e-01	1	-7.804	L5D6_OR_VS_L5D6_Ctr	noSig	LOC101746376
1031	KWMTBOMO01031	0.343	0.171	6.604	1.95e-03	0.0195	-1.409	L5D6_OR_VS_L5D6_Ctr	noSig	LOC101738563
1032	KWMTBOMO01032	-0.885	2.142	-4.605	7.99e-03	0.05	-3.083	L5D6_OR_VS_L5D6_Ctr	noSig	LOC101746514
1033	KWMTBOMO01033	0	0	0	1.00e+00	1	-7.814	L5D6_OR_VS_L5D6_Ctr	noSig	NA
1034	KWMTBOMO01034	-0.314	0.863	-2.327	7.47e-02	0.252	-5.654	L5D6_OR_VS_L5D6_Ctr	noSig	LOC101746655
1035	KWMTBOMO01035	-1.077	1.891	-11.812	1.71e-04	0.00504	1.459	L5D6_OR_VS_L5D6_Ctr	down	LOC101738789
1036	KWMTBOMO01036	1.092	2.674	8.708	6.23e-04	0.00985	-0.056	L5D6_OR_VS_L5D6_Ctr	up	LOC101739065
1037	KWMTBOMO01037	-0.105	0.352	-1.054	3.46e-01	0.631	-7.206	L5D6_OR_VS_L5D6_Ctr	noSig	LOC101738925
1038	KWMTBOMO01038	0	0	0	1.00e+00	1	-7.814	L5D6_OR_VS_L5D6_Ctr	noSig	LOC105841296
1039	KWMTBOMO01039	-0.192	0.355	-0.584	5.88e-01	0.916	-7.612	L5D6_OR_VS_L5D6_Ctr	noSig	LOC100500750
1040	KWMTBOMO01040	-0.114	0.094	-0.769	4.81e-01	0.791	-7.474	L5D6_OR_VS_L5D6_Ctr	noSig	NA
1041	KWMTBOMO01041	-0.673	1.913	-7.039	1.50e-03	0.0165	-1.101	L5D6_OR_VS_L5D6_Ctr	down	LOC101739296
1042	KWMTBOMO01042	0.126	0.594	0.301	7.77e-01	1	-7.759	L5D6_OR_VS_L5D6_Ctr	noSig	LOC101746935
1043	KWMTBOMO01043	-3.693	5.531	-33.646	1.82e-06	0.00102	6.231	L5D6_OR_VS_L5D6_Ctr	down	LOC101739441
1044	KWMTBOMO01044	0	0	0	1.00e+00	1	-7.814	L5D6_OR_VS_L5D6_Ctr	noSig	NA
1045	KWMTBOMO01045	-0.192	1.266	-1.584	1.82e-01	0.464	-6.598	L5D6_OR_VS_L5D6_Ctr	noSig	LOC101739724
1046	KWMTBOMO01046	0.408	0.204	3.517	2.10e-02	0.0986	-4.215	L5D6_OR_VS_L5D6_Ctr	noSig	LOC101739864
1047	KWMTBOMO01047	-0.57	1.616	-5.665	3.60e-03	0.029	-2.138	L5D6_OR_VS_L5D6_Ctr	down	LOC101740129
1048	KWMTBOMO01048	-0.479	1.125	-1.43	2.20e-01	0.528	-6.785	L5D6_OR_VS_L5D6_Ctr	noSig	LOC101739997
1049	KWMTBOMO01049	0.256	3.018	1.202	2.90e-01	0.631	-7.048	L5D6_OR_VS_L5D6_Ctr	noSig	LOC101740268
1050	KWMTBOMO01050	0.052	0.395	0.811	4.59e-01	0.765	-7.438	L5D6_OR_VS_L5D6_Ctr	noSig	LOC101747067
1051	KWMTBOMO01051	0	0	0	1.00e+00	1	-7.814	L5D6_OR_VS_L5D6_Ctr	noSig	LOC110384826
1052	KWMTBOMO01052	-0.178	0.181	-3.957	1.39e-02	0.0733	-3.735	L5D6_OR_VS_L5D6_Ctr	noSig	LOC101747202
1053	KWMTBOMO01053	0.46	1.757	3.742	1.70e-02	0.0846	-3.966	L5D6_OR_VS_L5D6_Ctr	noSig	LOC101740490
1054	KWMTBOMO01054	-0.265	3.272	-0.901	4.14e-01	0.709	-7.357	L5D6_OR_VS_L5D6_Ctr	noSig	LOC101740631
1055	KWMTBOMO01055	0	11.395	0.003	9.98e-01	1	-7.814	L5D6_OR_VS_L5D6_Ctr	noSig	RpS26
1056	KWMTBOMO01056	-0.034	4.386	-0.19	8.58e-01	1	-7.792	L5D6_OR_VS_L5D6_Ctr	noSig	LOC101740771
1057	KWMTBOMO01057	-1.497	1.37	-6.698	1.84e-03	0.0188	-1.341	L5D6_OR_VS_L5D6_Ctr	down	LOC101740910
1058	KWMTBOMO01058	-0.091	0.069	-0.817	4.56e-01	0.761	-7.433	L5D6_OR_VS_L5D6_Ctr	noSig	NA
1059	KWMTBOMO01059	-0.073	1.592	-0.349	7.43e-01	1	-7.74	L5D6_OR_VS_L5D6_Ctr	noSig	LOC732951
1060	KWMTBOMO01060	0.084	2.559	0.252	8.13e-01	1	-7.775	L5D6_OR_VS_L5D6_Ctr	noSig	NA
1061	KWMTBOMO01061	-0.113	3.236	-0.496	6.44e-01	0.975	-7.667	L5D6_OR_VS_L5D6_Ctr	noSig	3HCD
1062	KWMTBOMO01062	-0.117	2.789	-0.522	6.27e-01	0.957	-7.652	L5D6_OR_VS_L5D6_Ctr	noSig	LOC101741053
1063	KWMTBOMO01063	0.042	3.759	0.322	7.62e-01	1	-7.751	L5D6_OR_VS_L5D6_Ctr	noSig	Jnk
1064	KWMTBOMO01064	-1.505	4.768	-9.999	3.48e-04	0.00717	0.63	L5D6_OR_VS_L5D6_Ctr	down	Lark
1065	KWMTBOMO01065	-0.186	5.433	-1.385	2.32e-01	0.55	-6.839	L5D6_OR_VS_L5D6_Ctr	noSig	LOC101741200
1066	KWMTBOMO01066	-0.381	0.191	-1.048	3.49e-01	0.631	-7.213	L5D6_OR_VS_L5D6_Ctr	noSig	NA
1067	KWMTBOMO01067	-0.071	0.219	-0.645	5.51e-01	0.873	-7.57	L5D6_OR_VS_L5D6_Ctr	noSig	NA
1068	KWMTBOMO01068	0.181	12.424	3.84	1.55e-02	0.0791	-3.86	L5D6_OR_VS_L5D6_Ctr	noSig	RpL34
1069	KWMTBOMO01069	0	0	0	1.00e+00	1	-7.814	L5D6_OR_VS_L5D6_Ctr	noSig	NA
1070	KWMTBOMO01070	0.516	3.979	8.429	7.14e-04	0.0107	-0.217	L5D6_OR_VS_L5D6_Ctr	up	LOC101741422
1071	KWMTBOMO01071	-0.513	1.509	-2.949	3.74e-02	0.151	-4.878	L5D6_OR_VS_L5D6_Ctr	noSig	LOC101741560
1072	KWMTBOMO01072	-0.307	1.93	-1.781	1.43e-01	0.389	-6.351	L5D6_OR_VS_L5D6_Ctr	noSig	LOC101735413
1073	KWMTBOMO01073	-0.62	2.495	-2.109	9.64e-02	0.304	-5.932	L5D6_OR_VS_L5D6_Ctr	noSig	LOC101735547
1074	KWMTBOMO01074	-0.702	1.997	-9.967	3.53e-04	0.00722	0.614	L5D6_OR_VS_L5D6_Ctr	down	LOC692909
1075	KWMTBOMO01075	0.015	0.986	0.076	9.43e-01	1	-7.81	L5D6_OR_VS_L5D6_Ctr	noSig	LOC101741707
1076	KWMTBOMO01076	-0.43	3.906	-5.566	3.86e-03	0.0305	-2.22	L5D6_OR_VS_L5D6_Ctr	noSig	LOC692855
1077	KWMTBOMO01077	-0.707	2.819	-1.344	2.44e-01	0.571	-6.887	L5D6_OR_VS_L5D6_Ctr	noSig	LOC101741855
1078	KWMTBOMO01078	-0.283	3.556	-2.326	7.48e-02	0.252	-5.654	L5D6_OR_VS_L5D6_Ctr	noSig	LOC101735688
1079	KWMTBOMO01079	-0.061	2.122	-0.162	8.78e-01	1	-7.798	L5D6_OR_VS_L5D6_Ctr	noSig	LOC101742147
1080	KWMTBOMO01080	0	0	0	1.00e+00	1	-7.814	L5D6_OR_VS_L5D6_Ctr	noSig	Cyp366a1
1081	KWMTBOMO01081	0	0	0	1.00e+00	1	-7.814	L5D6_OR_VS_L5D6_Ctr	noSig	NA
1082	KWMTBOMO01082	0	0	0	1.00e+00	1	-7.814	L5D6_OR_VS_L5D6_Ctr	noSig	Or-39
1083	KWMTBOMO01083	0	0	0	1.00e+00	1	-7.814	L5D6_OR_VS_L5D6_Ctr	noSig	Or-38
1084	KWMTBOMO01084	-0.22	1.183	-0.958	3.88e-01	0.673	-7.303	L5D6_OR_VS_L5D6_Ctr	noSig	LOC101742293
1085	KWMTBOMO01085	-0.247	0.203	-1.424	2.22e-01	0.531	-6.793	L5D6_OR_VS_L5D6_Ctr	noSig	LOC101742440
1086	KWMTBOMO01086	0.72	0.783	1.738	1.51e-01	0.404	-6.406	L5D6_OR_VS_L5D6_Ctr	noSig	LOC101742584
1087	KWMTBOMO01087	-0.616	1.704	-3.112	3.16e-02	0.133	-4.684	L5D6_OR_VS_L5D6_Ctr	noSig	LOC101742723
1088	KWMTBOMO01088	0.062	0.433	0.293	7.83e-01	1	-7.761	L5D6_OR_VS_L5D6_Ctr	noSig	LOC101735829
1089	KWMTBOMO01089	-0.143	2.577	-0.834	4.47e-01	0.751	-7.418	L5D6_OR_VS_L5D6_Ctr	noSig	LOC101743212
1090	KWMTBOMO01090	0.037	0.019	1.047	3.49e-01	0.631	-7.214	L5D6_OR_VS_L5D6_Ctr	noSig	LOC101736087
1091	KWMTBOMO01091	0.887	3.449	1.572	1.85e-01	0.468	-6.613	L5D6_OR_VS_L5D6_Ctr	noSig	LOC101743531
1092	KWMTBOMO01092	0.158	0.079	1.048	3.49e-01	0.631	-7.213	L5D6_OR_VS_L5D6_Ctr	noSig	NA
1093	KWMTBOMO01093	-0.06	0.089	-0.474	6.58e-01	0.99	-7.679	L5D6_OR_VS_L5D6_Ctr	noSig	NA
1094	KWMTBOMO01094	-0.073	0.093	-1.053	3.47e-01	0.631	-7.208	L5D6_OR_VS_L5D6_Ctr	noSig	LOC101736475
1095	KWMTBOMO01095	1.353	2.981	4.719	7.29e-03	0.0468	-2.974	L5D6_OR_VS_L5D6_Ctr	up	LOC101743670
1096	KWMTBOMO01096	-0.256	0.161	-1.684	1.61e-01	0.425	-6.473	L5D6_OR_VS_L5D6_Ctr	noSig	LOC101736753
1097	KWMTBOMO01097	0	0	0	1.00e+00	1	-7.814	L5D6_OR_VS_L5D6_Ctr	noSig	LOC101736879
1098	KWMTBOMO01098	0.048	1.31	0.146	8.90e-01	1	-7.801	L5D6_OR_VS_L5D6_Ctr	noSig	NA
1099	KWMTBOMO01099	0.297	1.826	0.603	5.76e-01	0.903	-7.6	L5D6_OR_VS_L5D6_Ctr	noSig	NA
1100	KWMTBOMO01100	-0.102	0.448	-0.269	8.00e-01	1	-7.77	L5D6_OR_VS_L5D6_Ctr	noSig	LOC101743819
1101	KWMTBOMO01101	0	0	0	1.00e+00	1	-7.814	L5D6_OR_VS_L5D6_Ctr	noSig	LOC105841304
1102	KWMTBOMO01102	0.014	0.03	0.324	7.61e-01	1	-7.75	L5D6_OR_VS_L5D6_Ctr	noSig	NA
1103	KWMTBOMO01103	0	0	0	1.00e+00	1	-7.814	L5D6_OR_VS_L5D6_Ctr	noSig	LOC105841299
1104	KWMTBOMO01104	0	0	0	1.00e+00	1	-7.814	L5D6_OR_VS_L5D6_Ctr	noSig	LOC110384836
1105	KWMTBOMO01105	0	0	0	1.00e+00	1	-7.814	L5D6_OR_VS_L5D6_Ctr	noSig	LOC101737013
1106	KWMTBOMO01106	0.226	0.366	1.649	1.68e-01	0.438	-6.518	L5D6_OR_VS_L5D6_Ctr	noSig	LOC101743967
1107	KWMTBOMO01107	0.019	0.105	0.135	8.98e-01	1	-7.802	L5D6_OR_VS_L5D6_Ctr	noSig	NA
1108	KWMTBOMO01108	0.019	0.009	1.044	3.50e-01	0.631	-7.217	L5D6_OR_VS_L5D6_Ctr	noSig	NA
1109	KWMTBOMO01109	0	0	0	1.00e+00	1	-7.814	L5D6_OR_VS_L5D6_Ctr	noSig	NA
1110	KWMTBOMO01110	-0.278	0.21	-1.41	2.25e-01	0.537	-6.809	L5D6_OR_VS_L5D6_Ctr	noSig	NA
1111	KWMTBOMO01111	0.05	0.025	1.047	3.49e-01	0.631	-7.214	L5D6_OR_VS_L5D6_Ctr	noSig	LOC101737289
1112	KWMTBOMO01112	-0.211	0.174	-1.414	2.24e-01	0.535	-6.804	L5D6_OR_VS_L5D6_Ctr	noSig	LOC101737431
1113	KWMTBOMO01113	-0.05	0.025	-1.047	3.49e-01	0.631	-7.214	L5D6_OR_VS_L5D6_Ctr	noSig	LOC101737572
1114	KWMTBOMO01114	0.037	6.305	0.184	8.62e-01	1	-7.793	L5D6_OR_VS_L5D6_Ctr	noSig	LOC101744256
1115	KWMTBOMO01115	1.262	4.345	6.705	1.83e-03	0.0188	-1.336	L5D6_OR_VS_L5D6_Ctr	up	LOC101744452
1116	KWMTBOMO01116	-0.054	0.064	-0.994	3.72e-01	0.652	-7.268	L5D6_OR_VS_L5D6_Ctr	noSig	LOC101744695
1117	KWMTBOMO01117	0	0	0	1.00e+00	1	-7.814	L5D6_OR_VS_L5D6_Ctr	noSig	LOC105841298
1118	KWMTBOMO01118	-0.093	1.746	-0.568	5.98e-01	0.926	-7.623	L5D6_OR_VS_L5D6_Ctr	noSig	Fah
1119	KWMTBOMO01119	0.364	1.048	2.616	5.38e-02	0.198	-5.288	L5D6_OR_VS_L5D6_Ctr	noSig	LOC101737715
1120	KWMTBOMO01120	-0.092	0.046	-2.094	9.81e-02	0.304	-5.951	L5D6_OR_VS_L5D6_Ctr	noSig	NA
1121	KWMTBOMO01121	-0.611	2.291	-6.093	2.70e-03	0.0242	-1.794	L5D6_OR_VS_L5D6_Ctr	down	LOC101737853
1122	KWMTBOMO01122	-2.14	1.493	-16.841	3.71e-05	0.00254	3.197	L5D6_OR_VS_L5D6_Ctr	down	LOC101745220
1123	KWMTBOMO01123	0.794	1.67	5.386	4.39e-03	0.033	-2.373	L5D6_OR_VS_L5D6_Ctr	up	LOC101745369
1124	KWMTBOMO01124	-1.01	1.973	-3.977	1.37e-02	0.0725	-3.715	L5D6_OR_VS_L5D6_Ctr	noSig	Apkc
1125	KWMTBOMO01125	-0.068	0.1	-0.658	5.43e-01	0.866	-7.56	L5D6_OR_VS_L5D6_Ctr	noSig	NA
1126	KWMTBOMO01126	0.004	0.156	0.043	9.68e-01	1	-7.813	L5D6_OR_VS_L5D6_Ctr	noSig	NA
1127	KWMTBOMO01127	-0.01	0.537	-0.041	9.69e-01	1	-7.813	L5D6_OR_VS_L5D6_Ctr	noSig	Apkc.1
1128	KWMTBOMO01128	0.08	0.933	0.4	7.08e-01	1	-7.718	L5D6_OR_VS_L5D6_Ctr	noSig	LOC101743030
1129	KWMTBOMO01129	-0.194	4.773	-1.661	1.66e-01	0.434	-6.502	L5D6_OR_VS_L5D6_Ctr	noSig	LOC732972
1130	KWMTBOMO01130	-0.536	0.494	-4.799	6.84e-03	0.0447	-2.899	L5D6_OR_VS_L5D6_Ctr	down	LOC100529238
1131	KWMTBOMO01131	0.316	9.704	3.718	1.74e-02	0.0861	-3.992	L5D6_OR_VS_L5D6_Ctr	noSig	LOC693075
1132	KWMTBOMO01132	0	0	0	1.00e+00	1	-7.814	L5D6_OR_VS_L5D6_Ctr	noSig	LOC101740728
1133	KWMTBOMO01133	-0.527	0.54	-4.044	1.29e-02	0.0697	-3.644	L5D6_OR_VS_L5D6_Ctr	noSig	LOC101736847
1134	KWMTBOMO01134	0	0	0	1.00e+00	1	-7.814	L5D6_OR_VS_L5D6_Ctr	noSig	LOC101736976
1135	KWMTBOMO01135	-0.344	0.979	-0.494	6.45e-01	0.975	-7.668	L5D6_OR_VS_L5D6_Ctr	noSig	LOC732945
1136	KWMTBOMO01136	-0.592	1.543	-4.63	7.83e-03	0.0493	-3.059	L5D6_OR_VS_L5D6_Ctr	down	LOC101737106
1137	KWMTBOMO01137	0.01	2.343	0.083	9.37e-01	1	-7.809	L5D6_OR_VS_L5D6_Ctr	noSig	NA
1138	KWMTBOMO01138	-0.444	0.222	-1.048	3.49e-01	0.631	-7.213	L5D6_OR_VS_L5D6_Ctr	noSig	LOC101741006
1139	KWMTBOMO01139	0.232	1.834	1.401	2.28e-01	0.541	-6.82	L5D6_OR_VS_L5D6_Ctr	noSig	LOC101741153
1140	KWMTBOMO01140	0.261	7.842	2.803	4.38e-02	0.17	-5.057	L5D6_OR_VS_L5D6_Ctr	noSig	LOC101737397
1141	KWMTBOMO01141	-0.262	0.335	-3.974	1.37e-02	0.0726	-3.718	L5D6_OR_VS_L5D6_Ctr	noSig	LOC101741433
1142	KWMTBOMO01142	-1.127	1.259	-4.545	8.40e-03	0.0516	-3.141	L5D6_OR_VS_L5D6_Ctr	noSig	LOC101737539
1143	KWMTBOMO01143	-1.015	1.665	-6.348	2.29e-03	0.0215	-1.599	L5D6_OR_VS_L5D6_Ctr	down	LOC101737684
1144	KWMTBOMO01144	-1.132	1.37	-4.421	9.31e-03	0.0553	-3.262	L5D6_OR_VS_L5D6_Ctr	noSig	NA
1145	KWMTBOMO01145	-1.253	1.026	-5.833	3.21e-03	0.0272	-2.001	L5D6_OR_VS_L5D6_Ctr	down	LOC101741572
1146	KWMTBOMO01146	-0.153	2.099	-1.615	1.75e-01	0.451	-6.559	L5D6_OR_VS_L5D6_Ctr	noSig	LOC101741718
1147	KWMTBOMO01147	0.033	5.475	0.296	7.81e-01	1	-7.761	L5D6_OR_VS_L5D6_Ctr	noSig	LOC101737820
1148	KWMTBOMO01148	0.097	11.201	2.53	5.93e-02	0.212	-5.397	L5D6_OR_VS_L5D6_Ctr	noSig	Rack1
1149	KWMTBOMO01149	0.161	1.139	0.939	3.96e-01	0.685	-7.321	L5D6_OR_VS_L5D6_Ctr	noSig	Mppd
1150	KWMTBOMO01150	0.228	2.949	0.746	4.94e-01	0.807	-7.493	L5D6_OR_VS_L5D6_Ctr	noSig	LOC101741866
1151	KWMTBOMO01151	-0.298	3.247	-0.855	4.37e-01	0.738	-7.4	L5D6_OR_VS_L5D6_Ctr	noSig	NA
1152	KWMTBOMO01152	-0.219	3.495	-1.035	3.54e-01	0.631	-7.227	L5D6_OR_VS_L5D6_Ctr	noSig	NA
1153	KWMTBOMO01153	0.112	2.733	0.587	5.86e-01	0.914	-7.611	L5D6_OR_VS_L5D6_Ctr	noSig	LOC101737952
1154	KWMTBOMO01154	-0.17	0.423	-1.208	2.88e-01	0.631	-7.041	L5D6_OR_VS_L5D6_Ctr	noSig	LOC101738086
1155	KWMTBOMO01155	0.255	3.78	1.794	1.41e-01	0.385	-6.335	L5D6_OR_VS_L5D6_Ctr	noSig	LOC101738343
1156	KWMTBOMO01156	1.145	4.956	8.435	7.12e-04	0.0107	-0.214	L5D6_OR_VS_L5D6_Ctr	up	LOC101738481
1157	KWMTBOMO01157	-0.803	4.055	-8.612	6.53e-04	0.0101	-0.111	L5D6_OR_VS_L5D6_Ctr	down	LOC101738609
1158	KWMTBOMO01158	0	0	0	1.00e+00	1	-7.814	L5D6_OR_VS_L5D6_Ctr	noSig	LOC110385209
1159	KWMTBOMO01159	0	0	0	1.00e+00	1	-7.814	L5D6_OR_VS_L5D6_Ctr	noSig	NA
1160	KWMTBOMO01160	-0.032	0.03	-0.69	5.25e-01	0.844	-7.537	L5D6_OR_VS_L5D6_Ctr	noSig	NA
1161	KWMTBOMO01161	0	0	0	1.00e+00	1	-7.814	L5D6_OR_VS_L5D6_Ctr	noSig	NA
1162	KWMTBOMO01162	0.418	0.937	3.902	1.47e-02	0.076	-3.794	L5D6_OR_VS_L5D6_Ctr	noSig	_Bre4
1163	KWMTBOMO01163	-0.141	0.112	-0.789	4.71e-01	0.778	-7.457	L5D6_OR_VS_L5D6_Ctr	noSig	LOC101738885
1164	KWMTBOMO01164	-0.073	3.065	-0.738	4.98e-01	0.811	-7.499	L5D6_OR_VS_L5D6_Ctr	noSig	LOC101740705
1165	KWMTBOMO01165	-0.338	7.913	-2.979	3.62e-02	0.147	-4.842	L5D6_OR_VS_L5D6_Ctr	noSig	LOC101739023
1166	KWMTBOMO01166	-0.507	0.581	-2.112	9.61e-02	0.303	-5.929	L5D6_OR_VS_L5D6_Ctr	noSig	NA
1167	KWMTBOMO01167	-0.457	0.485	-4.138	1.19e-02	0.066	-3.547	L5D6_OR_VS_L5D6_Ctr	noSig	LOC101742157
1168	KWMTBOMO01168	0	0	0	1.00e+00	1	-7.814	L5D6_OR_VS_L5D6_Ctr	noSig	NA
1169	KWMTBOMO01169	0.159	0.079	1.465	2.10e-01	0.512	-6.743	L5D6_OR_VS_L5D6_Ctr	noSig	LOC110385465
1170	KWMTBOMO01170	1.293	2.816	3.526	2.09e-02	0.098	-4.205	L5D6_OR_VS_L5D6_Ctr	noSig	Sod2
1171	KWMTBOMO01171	0.31	3.674	2.12	9.52e-02	0.301	-5.918	L5D6_OR_VS_L5D6_Ctr	noSig	LOC101739170
1172	KWMTBOMO01172	0.179	2.735	0.911	4.09e-01	0.702	-7.347	L5D6_OR_VS_L5D6_Ctr	noSig	LOC101739305
1173	KWMTBOMO01173	-1.086	1.831	-10.203	3.19e-04	0.00685	0.731	L5D6_OR_VS_L5D6_Ctr	down	LOC101742299
1174	KWMTBOMO01174	-0.422	2.727	-1.497	2.03e-01	0.498	-6.705	L5D6_OR_VS_L5D6_Ctr	noSig	LOC101739451
1175	KWMTBOMO01175	0.27	2.684	1.571	1.85e-01	0.468	-6.614	L5D6_OR_VS_L5D6_Ctr	noSig	LOC101739592
1176	KWMTBOMO01176	-0.041	0.021	-1.047	3.49e-01	0.631	-7.214	L5D6_OR_VS_L5D6_Ctr	noSig	LOC110385388
1177	KWMTBOMO01177	-0.087	4.485	-0.441	6.80e-01	1	-7.697	L5D6_OR_VS_L5D6_Ctr	noSig	LOC101739920
1178	KWMTBOMO01178	-0.066	0.24	-0.399	7.09e-01	1	-7.718	L5D6_OR_VS_L5D6_Ctr	noSig	NA
1179	KWMTBOMO01179	-0.384	3.206	-1.619	1.74e-01	0.45	-6.555	L5D6_OR_VS_L5D6_Ctr	noSig	NA
1180	KWMTBOMO01180	-1.253	2.173	-9.151	5.06e-04	0.00884	0.19	L5D6_OR_VS_L5D6_Ctr	down	LOC101740056
1181	KWMTBOMO01181	-0.092	0.046	-1.048	3.49e-01	0.631	-7.213	L5D6_OR_VS_L5D6_Ctr	noSig	LOC101742449
1182	KWMTBOMO01182	0.966	8.193	7.743	1.02e-03	0.0131	-0.636	L5D6_OR_VS_L5D6_Ctr	up	LOC692786
1183	KWMTBOMO01183	-0.71	2.465	-4.177	1.15e-02	0.0644	-3.507	L5D6_OR_VS_L5D6_Ctr	noSig	LOC101740189
1184	KWMTBOMO01184	0.088	0.044	1.048	3.49e-01	0.631	-7.213	L5D6_OR_VS_L5D6_Ctr	noSig	LOC101742593
1185	KWMTBOMO01185	0	0	0	1.00e+00	1	-7.814	L5D6_OR_VS_L5D6_Ctr	noSig	NA
1186	KWMTBOMO01186	0.226	1.23	1.01	3.65e-01	0.645	-7.251	L5D6_OR_VS_L5D6_Ctr	noSig	LOC101740456
1187	KWMTBOMO01187	-0.968	2.87	-5.38	4.41e-03	0.0331	-2.378	L5D6_OR_VS_L5D6_Ctr	down	LOC101740589
1188	KWMTBOMO01188	-1.065	1.875	-6.271	2.40e-03	0.0223	-1.657	L5D6_OR_VS_L5D6_Ctr	down	LOC101735512
1189	KWMTBOMO01189	0.578	4.4	2.697	4.92e-02	0.185	-5.188	L5D6_OR_VS_L5D6_Ctr	noSig	LOC101747176
1190	KWMTBOMO01190	-0.769	1.382	-8.858	5.80e-04	0.0095	0.028	L5D6_OR_VS_L5D6_Ctr	down	LOC101735649
1191	KWMTBOMO01191	-0.067	0.406	-0.723	5.06e-01	0.822	-7.511	L5D6_OR_VS_L5D6_Ctr	noSig	LOC101735791
1192	KWMTBOMO01192	-0.187	0.537	-1.712	1.56e-01	0.414	-6.438	L5D6_OR_VS_L5D6_Ctr	noSig	LOC101746500
1193	KWMTBOMO01193	-0.345	1.402	-1.403	2.27e-01	0.541	-6.817	L5D6_OR_VS_L5D6_Ctr	noSig	LOC101742348
1194	KWMTBOMO01194	0.308	1.494	3.142	3.06e-02	0.13	-4.647	L5D6_OR_VS_L5D6_Ctr	noSig	LOC733033
1195	KWMTBOMO01195	0	0	0	1.00e+00	1	-7.814	L5D6_OR_VS_L5D6_Ctr	noSig	NA
1196	KWMTBOMO01196	0	0	0	1.00e+00	1	-7.814	L5D6_OR_VS_L5D6_Ctr	noSig	LOC110386227
1197	KWMTBOMO01197	0.059	0.029	1.047	3.49e-01	0.631	-7.214	L5D6_OR_VS_L5D6_Ctr	noSig	NA
1198	KWMTBOMO01198	0.019	0.009	1.044	3.50e-01	0.631	-7.217	L5D6_OR_VS_L5D6_Ctr	noSig	LOC101744315
1199	KWMTBOMO01199	0.05	0.025	1.047	3.49e-01	0.631	-7.214	L5D6_OR_VS_L5D6_Ctr	noSig	NA
1200	KWMTBOMO01200	0	0	0	1.00e+00	1	-7.814	L5D6_OR_VS_L5D6_Ctr	noSig	NA
1201	KWMTBOMO01201	0	0	0	1.00e+00	1	-7.814	L5D6_OR_VS_L5D6_Ctr	noSig	NA
1202	KWMTBOMO01202	-0.149	0.12	-0.78	4.75e-01	0.784	-7.464	L5D6_OR_VS_L5D6_Ctr	noSig	NA
1203	KWMTBOMO01203	-0.011	0.496	-0.062	9.53e-01	1	-7.811	L5D6_OR_VS_L5D6_Ctr	noSig	NGR-A14
1204	KWMTBOMO01204	1.153	2.013	1.523	1.96e-01	0.487	-6.673	L5D6_OR_VS_L5D6_Ctr	noSig	LOC101741350
1205	KWMTBOMO01205	0	0	0	1.00e+00	1	-7.814	L5D6_OR_VS_L5D6_Ctr	noSig	NA
1206	KWMTBOMO01206	0.063	0.032	1.047	3.49e-01	0.631	-7.214	L5D6_OR_VS_L5D6_Ctr	noSig	LOC101741012
1207	KWMTBOMO01207	0	0	0	1.00e+00	1	-7.814	L5D6_OR_VS_L5D6_Ctr	noSig	NA
1208	KWMTBOMO01208	0.006	0.164	0.11	9.17e-01	1	-7.806	L5D6_OR_VS_L5D6_Ctr	noSig	NA
1209	KWMTBOMO01209	0	0	0	1.00e+00	1	-7.814	L5D6_OR_VS_L5D6_Ctr	noSig	NA
1210	KWMTBOMO01210	-0.046	0.088	-0.594	5.82e-01	0.909	-7.606	L5D6_OR_VS_L5D6_Ctr	noSig	NA
1211	KWMTBOMO01211	0.037	0.161	0.484	6.52e-01	0.983	-7.674	L5D6_OR_VS_L5D6_Ctr	noSig	NA
1212	KWMTBOMO01212	-0.178	3.266	-0.332	7.55e-01	1	-7.747	L5D6_OR_VS_L5D6_Ctr	noSig	LOC101737662
1213	KWMTBOMO01213	-0.004	0.272	-0.033	9.75e-01	1	-7.813	L5D6_OR_VS_L5D6_Ctr	noSig	LOC105842655
1214	KWMTBOMO01214	-0.232	0.412	-3.619	1.91e-02	0.0918	-4.102	L5D6_OR_VS_L5D6_Ctr	noSig	LOC101736910
1215	KWMTBOMO01215	0.005	0.021	0.16	8.80e-01	1	-7.798	L5D6_OR_VS_L5D6_Ctr	noSig	NA
1216	KWMTBOMO01216	0.07	0.287	0.211	8.42e-01	1	-7.787	L5D6_OR_VS_L5D6_Ctr	noSig	LOC110386591
1217	KWMTBOMO01217	0	0	0	1.00e+00	1	-7.814	L5D6_OR_VS_L5D6_Ctr	noSig	LOC110385930
1218	KWMTBOMO01218	0.144	0.072	2.867	4.09e-02	0.161	-4.978	L5D6_OR_VS_L5D6_Ctr	noSig	LOC101741769
1219	KWMTBOMO01219	-0.092	0.183	-1.663	1.65e-01	0.433	-6.5	L5D6_OR_VS_L5D6_Ctr	noSig	LOC101741488
1220	KWMTBOMO01220	0	0	0	1.00e+00	1	-7.814	L5D6_OR_VS_L5D6_Ctr	noSig	LOC101744615
1221	KWMTBOMO01221	0	0	0	1.00e+00	1	-7.814	L5D6_OR_VS_L5D6_Ctr	noSig	LOC101739560
1222	KWMTBOMO01222	0	0	0	1.00e+00	1	-7.814	L5D6_OR_VS_L5D6_Ctr	noSig	LOC101743853
1223	KWMTBOMO01223	-0.557	0.45	-2.753	4.62e-02	0.177	-5.118	L5D6_OR_VS_L5D6_Ctr	noSig	NA
1224	KWMTBOMO01224	-0.152	0.31	-2.089	9.87e-02	0.304	-5.958	L5D6_OR_VS_L5D6_Ctr	noSig	Ago3
1225	KWMTBOMO01225	-0.458	0.421	-0.708	5.15e-01	0.832	-7.523	L5D6_OR_VS_L5D6_Ctr	noSig	NA
1226	KWMTBOMO01226	0.741	4.023	2.483	6.25e-02	0.221	-5.455	L5D6_OR_VS_L5D6_Ctr	noSig	LOC101743701
1227	KWMTBOMO01227	0.473	0.55	1.536	1.93e-01	0.482	-6.656	L5D6_OR_VS_L5D6_Ctr	noSig	NA
1228	KWMTBOMO01228	0.64	0.387	3.45	2.24e-02	0.103	-4.291	L5D6_OR_VS_L5D6_Ctr	noSig	LOC101743559
1229	KWMTBOMO01229	-0.713	8.605	-10.853	2.46e-04	0.00597	1.038	L5D6_OR_VS_L5D6_Ctr	down	LOC101743420
1230	KWMTBOMO01230	-0.049	0.471	-0.491	6.47e-01	0.977	-7.67	L5D6_OR_VS_L5D6_Ctr	noSig	LOC101743279
1231	KWMTBOMO01231	0	0	0	1.00e+00	1	-7.814	L5D6_OR_VS_L5D6_Ctr	noSig	LOC101736207
1232	KWMTBOMO01232	-0.448	5.146	-3.022	3.46e-02	0.143	-4.79	L5D6_OR_VS_L5D6_Ctr	noSig	LOC101743136
1233	KWMTBOMO01233	0.036	0.534	0.103	9.23e-01	1	-7.807	L5D6_OR_VS_L5D6_Ctr	noSig	LOC101742993
1234	KWMTBOMO01234	-0.257	2.101	-1.217	2.85e-01	0.631	-7.032	L5D6_OR_VS_L5D6_Ctr	noSig	LOC101742852
1235	KWMTBOMO01235	0	0	0	1.00e+00	1	-7.814	L5D6_OR_VS_L5D6_Ctr	noSig	LOC101742703
1236	KWMTBOMO01236	-0.434	0.805	-9.904	3.62e-04	0.00734	0.582	L5D6_OR_VS_L5D6_Ctr	noSig	LOC101739146
1237	KWMTBOMO01237	-0.638	0.908	-1.762	1.46e-01	0.395	-6.375	L5D6_OR_VS_L5D6_Ctr	noSig	LOC110386171
1238	KWMTBOMO01238	0	0	0	1.00e+00	1	-7.814	L5D6_OR_VS_L5D6_Ctr	noSig	NA
1239	KWMTBOMO01239	0	0	0	1.00e+00	1	-7.814	L5D6_OR_VS_L5D6_Ctr	noSig	NA
1240	KWMTBOMO01240	-0.444	3.094	-2.559	5.73e-02	0.207	-5.359	L5D6_OR_VS_L5D6_Ctr	noSig	NA
1241	KWMTBOMO01241	-0.225	4.008	-1.871	1.28e-01	0.361	-6.236	L5D6_OR_VS_L5D6_Ctr	noSig	NA
1242	KWMTBOMO01242	-0.014	0.035	-0.563	6.01e-01	0.929	-7.626	L5D6_OR_VS_L5D6_Ctr	noSig	NA
1243	KWMTBOMO01243	-0.51	4.187	-4.449	9.09e-03	0.0545	-3.234	L5D6_OR_VS_L5D6_Ctr	noSig	LOC101738997
1244	KWMTBOMO01244	0	0	0	1.00e+00	1	-7.814	L5D6_OR_VS_L5D6_Ctr	noSig	NA
1245	KWMTBOMO01245	0.005	0.086	0.055	9.59e-01	1	-7.812	L5D6_OR_VS_L5D6_Ctr	noSig	NA
1246	KWMTBOMO01246	0.023	0.012	1.046	3.50e-01	0.631	-7.216	L5D6_OR_VS_L5D6_Ctr	noSig	NA
1247	KWMTBOMO01247	0.086	0.097	1.204	2.90e-01	0.631	-7.046	L5D6_OR_VS_L5D6_Ctr	noSig	LOC101742560
1248	KWMTBOMO01248	-0.119	0.092	-1.841	1.33e-01	0.371	-6.275	L5D6_OR_VS_L5D6_Ctr	noSig	NA
1249	KWMTBOMO01249	-0.185	1.702	-0.764	4.84e-01	0.794	-7.478	L5D6_OR_VS_L5D6_Ctr	noSig	NA
1250	KWMTBOMO01250	0	0	0	1.00e+00	1	-7.814	L5D6_OR_VS_L5D6_Ctr	noSig	NA
1251	KWMTBOMO01251	0.046	0.023	1.047	3.49e-01	0.631	-7.214	L5D6_OR_VS_L5D6_Ctr	noSig	NA
1252	KWMTBOMO01252	0.272	3.044	2.052	1.03e-01	0.31	-6.005	L5D6_OR_VS_L5D6_Ctr	noSig	PKG-I
1253	KWMTBOMO01253	0.051	0.058	2.293	7.77e-02	0.259	-5.696	L5D6_OR_VS_L5D6_Ctr	noSig	NA
1254	KWMTBOMO01254	-0.047	0.023	-2.091	9.85e-02	0.304	-5.955	L5D6_OR_VS_L5D6_Ctr	noSig	NA
1255	KWMTBOMO01255	-0.619	1.465	-5.064	5.57e-03	0.0389	-2.656	L5D6_OR_VS_L5D6_Ctr	down	LOC101742414
1256	KWMTBOMO01256	-1.017	0.649	-3.814	1.59e-02	0.0804	-3.888	L5D6_OR_VS_L5D6_Ctr	noSig	LOC101738723
1257	KWMTBOMO01257	-0.536	0.443	-4.177	1.15e-02	0.0644	-3.507	L5D6_OR_VS_L5D6_Ctr	noSig	NA
1258	KWMTBOMO01258	-0.182	0.105	-1.216	2.85e-01	0.631	-7.033	L5D6_OR_VS_L5D6_Ctr	noSig	LOC101742274
1259	KWMTBOMO01259	-0.787	0.512	-3.559	2.02e-02	0.0956	-4.168	L5D6_OR_VS_L5D6_Ctr	noSig	LOC101738588
1260	KWMTBOMO01260	0	0	0	1.00e+00	1	-7.814	L5D6_OR_VS_L5D6_Ctr	noSig	LOC732982
1261	KWMTBOMO01261	0	0	0	1.00e+00	1	-7.814	L5D6_OR_VS_L5D6_Ctr	noSig	LOC101742121
1262	KWMTBOMO01262	-0.084	0.042	-1.048	3.49e-01	0.631	-7.213	L5D6_OR_VS_L5D6_Ctr	noSig	Sp2
1263	KWMTBOMO01263	0.056	0.028	2.092	9.84e-02	0.304	-5.954	L5D6_OR_VS_L5D6_Ctr	noSig	sp3
1264	KWMTBOMO01264	0	0	0	1.00e+00	1	-7.814	L5D6_OR_VS_L5D6_Ctr	noSig	LOC101738457
1265	KWMTBOMO01265	0	0	0	1.00e+00	1	-7.814	L5D6_OR_VS_L5D6_Ctr	noSig	LOC101741981
1266	KWMTBOMO01266	0	0	0	1.00e+00	1	-7.814	L5D6_OR_VS_L5D6_Ctr	noSig	LOC101741552
1267	KWMTBOMO01267	0.028	0.014	1.046	3.50e-01	0.631	-7.215	L5D6_OR_VS_L5D6_Ctr	noSig	NA
1268	KWMTBOMO01268	1.248	0.624	2.077	1.00e-01	0.305	-5.974	L5D6_OR_VS_L5D6_Ctr	noSig	NA
1269	KWMTBOMO01269	0.019	0.009	1.044	3.50e-01	0.631	-7.217	L5D6_OR_VS_L5D6_Ctr	noSig	NPLP1
1270	KWMTBOMO01270	-0.118	0.447	-0.544	6.13e-01	0.941	-7.638	L5D6_OR_VS_L5D6_Ctr	noSig	LOC101741830
1271	KWMTBOMO01271	-0.19	7.097	-4.979	5.95e-03	0.0407	-2.733	L5D6_OR_VS_L5D6_Ctr	noSig	LOC101741544
1272	KWMTBOMO01272	-0.251	3.096	-1.049	3.49e-01	0.631	-7.212	L5D6_OR_VS_L5D6_Ctr	noSig	NA
1273	KWMTBOMO01273	0.132	12.035	2.84	4.20e-02	0.165	-5.01	L5D6_OR_VS_L5D6_Ctr	noSig	RpL13A
1274	KWMTBOMO01274	-0.335	5.783	-1.669	1.64e-01	0.431	-6.492	L5D6_OR_VS_L5D6_Ctr	noSig	LOC101741265
1275	KWMTBOMO01275	0	0	0	1.00e+00	1	-7.814	L5D6_OR_VS_L5D6_Ctr	noSig	NA
1276	KWMTBOMO01276	-0.544	3.649	-7.381	1.24e-03	0.0147	-0.87	L5D6_OR_VS_L5D6_Ctr	down	LOC101741028
1277	KWMTBOMO01277	-0.158	0.12	-1.529	1.95e-01	0.485	-6.666	L5D6_OR_VS_L5D6_Ctr	noSig	LOC101738057
1278	KWMTBOMO01278	1.147	3.602	2.659	5.13e-02	0.191	-5.234	L5D6_OR_VS_L5D6_Ctr	noSig	LOC101740657
1279	KWMTBOMO01279	0.348	0.174	1.048	3.49e-01	0.631	-7.213	L5D6_OR_VS_L5D6_Ctr	noSig	LOC105842400
1280	KWMTBOMO01280	0.107	4.443	0.679	5.31e-01	0.852	-7.545	L5D6_OR_VS_L5D6_Ctr	noSig	LOC101740517
1281	KWMTBOMO01281	-0.867	5.573	-13.588	9.38e-05	0.00373	2.152	L5D6_OR_VS_L5D6_Ctr	down	LOC692884
1282	KWMTBOMO01282	0	0	0	1.00e+00	1	-7.814	L5D6_OR_VS_L5D6_Ctr	noSig	NA
1283	KWMTBOMO01283	0.014	0.135	0.158	8.81e-01	1	-7.798	L5D6_OR_VS_L5D6_Ctr	noSig	NA
1284	KWMTBOMO01284	0.083	0.247	0.837	4.46e-01	0.749	-7.416	L5D6_OR_VS_L5D6_Ctr	noSig	NA
1285	KWMTBOMO01285	-0.051	0.054	-0.663	5.41e-01	0.862	-7.557	L5D6_OR_VS_L5D6_Ctr	noSig	LOC101740251
1286	KWMTBOMO01286	-0.755	2.596	-3.814	1.59e-02	0.0804	-3.888	L5D6_OR_VS_L5D6_Ctr	noSig	LOC101740113
1287	KWMTBOMO01287	0.813	6.243	7.149	1.41e-03	0.0157	-1.026	L5D6_OR_VS_L5D6_Ctr	up	LOC101737926
1288	KWMTBOMO01288	0	0	0	1.00e+00	1	-7.814	L5D6_OR_VS_L5D6_Ctr	noSig	LOC100529205
1289	KWMTBOMO01289	0.005	0.021	0.244	8.18e-01	1	-7.777	L5D6_OR_VS_L5D6_Ctr	noSig	LOC110386239
1290	KWMTBOMO01290	0.231	0.115	1.845	1.32e-01	0.369	-6.27	L5D6_OR_VS_L5D6_Ctr	noSig	NA
1291	KWMTBOMO01291	-1.374	2.101	-11.166	2.18e-04	0.00555	1.179	L5D6_OR_VS_L5D6_Ctr	down	LOC101739889
1292	KWMTBOMO01292	-0.051	0.145	-0.581	5.90e-01	0.918	-7.614	L5D6_OR_VS_L5D6_Ctr	noSig	NA
1293	KWMTBOMO01293	-0.023	0.012	-1.046	3.50e-01	0.631	-7.216	L5D6_OR_VS_L5D6_Ctr	noSig	NA
1294	KWMTBOMO01294	0.041	0.021	1.047	3.49e-01	0.631	-7.214	L5D6_OR_VS_L5D6_Ctr	noSig	LOC110386164
1295	KWMTBOMO01295	-0.037	0.052	-1.912	1.22e-01	0.349	-6.184	L5D6_OR_VS_L5D6_Ctr	noSig	LOC105841632
1296	KWMTBOMO01296	-0.331	1.792	-3.949	1.40e-02	0.0737	-3.744	L5D6_OR_VS_L5D6_Ctr	noSig	LOC101737655
1297	KWMTBOMO01297	0.056	0.853	0.203	8.48e-01	1	-7.789	L5D6_OR_VS_L5D6_Ctr	noSig	LOC101739473
1298	KWMTBOMO01298	0	0	0	1.00e+00	1	-7.814	L5D6_OR_VS_L5D6_Ctr	noSig	NA
1299	KWMTBOMO01299	-0.083	0.041	-2.094	9.82e-02	0.304	-5.951	L5D6_OR_VS_L5D6_Ctr	noSig	NA
1300	KWMTBOMO01300	-0.176	3.995	-1.189	2.95e-01	0.631	-7.062	L5D6_OR_VS_L5D6_Ctr	noSig	LOC101739090
1301	KWMTBOMO01301	-0.201	0.868	-1.042	3.51e-01	0.631	-7.219	L5D6_OR_VS_L5D6_Ctr	noSig	LOC101738678
1302	KWMTBOMO01302	-0.642	2.692	-5.402	4.34e-03	0.0328	-2.359	L5D6_OR_VS_L5D6_Ctr	down	LOC101738817
1303	KWMTBOMO01303	0.054	0.82	0.163	8.78e-01	1	-7.797	L5D6_OR_VS_L5D6_Ctr	noSig	LOC110386167
1304	KWMTBOMO01304	0.937	3.838	5.477	4.11e-03	0.0318	-2.295	L5D6_OR_VS_L5D6_Ctr	up	LOC101738358
1305	KWMTBOMO01305	-0.298	0.432	-1.276	2.65e-01	0.607	-6.966	L5D6_OR_VS_L5D6_Ctr	noSig	NA
1306	KWMTBOMO01306	0	0	0	1.00e+00	1	-7.814	L5D6_OR_VS_L5D6_Ctr	noSig	Mir2748
1307	KWMTBOMO01307	-0.481	0.535	-2.305	7.66e-02	0.256	-5.681	L5D6_OR_VS_L5D6_Ctr	noSig	NA
1308	KWMTBOMO01308	-0.019	0.143	-0.304	7.75e-01	1	-7.757	L5D6_OR_VS_L5D6_Ctr	noSig	NA
1309	KWMTBOMO01309	0.014	0.007	1.042	3.51e-01	0.631	-7.219	L5D6_OR_VS_L5D6_Ctr	noSig	LOC110386174
1310	KWMTBOMO01310	0	0	0	1.00e+00	1	-7.814	L5D6_OR_VS_L5D6_Ctr	noSig	LOC101738145
1311	KWMTBOMO01311	0	0	0	1.00e+00	1	-7.814	L5D6_OR_VS_L5D6_Ctr	noSig	NA
1312	KWMTBOMO01312	-0.293	6.006	-2.456	6.44e-02	0.226	-5.489	L5D6_OR_VS_L5D6_Ctr	noSig	LOC692958
1313	KWMTBOMO01313	-0.288	3.038	-0.742	4.96e-01	0.809	-7.496	L5D6_OR_VS_L5D6_Ctr	noSig	Cmc1
1314	KWMTBOMO01314	-0.301	1.964	-2.396	6.90e-02	0.238	-5.566	L5D6_OR_VS_L5D6_Ctr	noSig	LOC101738015
1315	KWMTBOMO01315	-0.955	5.197	-13.936	8.42e-05	0.00361	2.276	L5D6_OR_VS_L5D6_Ctr	down	LOC101742745
1316	KWMTBOMO01316	0	0	0	1.00e+00	1	-7.814	L5D6_OR_VS_L5D6_Ctr	noSig	NA
1317	KWMTBOMO01317	-0.274	3.687	-3.223	2.82e-02	0.122	-4.553	L5D6_OR_VS_L5D6_Ctr	noSig	LOC101737226
1318	KWMTBOMO01318	-1.061	1.505	-10.246	3.14e-04	0.00682	0.752	L5D6_OR_VS_L5D6_Ctr	down	LOC101737083
1319	KWMTBOMO01319	-0.59	1.106	-1.527	1.95e-01	0.486	-6.668	L5D6_OR_VS_L5D6_Ctr	noSig	NA
1320	KWMTBOMO01320	0.484	11.721	32.472	2.12e-06	0.00103	6.095	L5D6_OR_VS_L5D6_Ctr	noSig	RpL11
1321	KWMTBOMO01321	-0.482	0.783	-1.523	1.96e-01	0.487	-6.673	L5D6_OR_VS_L5D6_Ctr	noSig	NA
1322	KWMTBOMO01322	0.075	1.336	0.2	8.51e-01	1	-7.789	L5D6_OR_VS_L5D6_Ctr	noSig	NA
1323	KWMTBOMO01323	0.016	1.265	0.058	9.56e-01	1	-7.812	L5D6_OR_VS_L5D6_Ctr	noSig	LOC101737654
1324	KWMTBOMO01324	-0.097	0.229	-0.713	5.12e-01	0.829	-7.519	L5D6_OR_VS_L5D6_Ctr	noSig	LOC110386892
1325	KWMTBOMO01325	0.188	0.674	1.084	3.34e-01	0.631	-7.176	L5D6_OR_VS_L5D6_Ctr	noSig	LOC101737513
1326	KWMTBOMO01326	1.116	0.558	4.702	7.39e-03	0.0473	-2.99	L5D6_OR_VS_L5D6_Ctr	up	NA
1327	KWMTBOMO01327	-0.427	1.568	-2.099	9.76e-02	0.304	-5.945	L5D6_OR_VS_L5D6_Ctr	noSig	NA
1328	KWMTBOMO01328	-0.383	1.591	-3.436	2.28e-02	0.104	-4.307	L5D6_OR_VS_L5D6_Ctr	noSig	LOC101736949
1329	KWMTBOMO01329	0	0	0	1.00e+00	1	-7.814	L5D6_OR_VS_L5D6_Ctr	noSig	LOC101736819
1330	KWMTBOMO01330	0	0	0	1.00e+00	1	-7.814	L5D6_OR_VS_L5D6_Ctr	noSig	LOC101737374
1331	KWMTBOMO01331	-0.536	1.816	-3.968	1.38e-02	0.0728	-3.724	L5D6_OR_VS_L5D6_Ctr	noSig	LOC101737123
1332	KWMTBOMO01332	-0.599	2.114	-10.67	2.64e-04	0.00619	0.953	L5D6_OR_VS_L5D6_Ctr	down	NA
1333	KWMTBOMO01333	-1.082	3.247	-6.832	1.70e-03	0.0179	-1.246	L5D6_OR_VS_L5D6_Ctr	down	LOC101736729
1334	KWMTBOMO01334	-1.271	4.799	-10.469	2.86e-04	0.00648	0.859	L5D6_OR_VS_L5D6_Ctr	down	LOC101736586
1335	KWMTBOMO01335	0.223	6.16	1.938	1.18e-01	0.342	-6.152	L5D6_OR_VS_L5D6_Ctr	noSig	LOC692940
1336	KWMTBOMO01336	0	0	0	1.00e+00	1	-7.814	L5D6_OR_VS_L5D6_Ctr	noSig	LOC101736686
1337	KWMTBOMO01337	0	0	0	1.00e+00	1	-7.814	L5D6_OR_VS_L5D6_Ctr	noSig	LOC101736548
1338	KWMTBOMO01338	0	0	0	1.00e+00	1	-7.814	L5D6_OR_VS_L5D6_Ctr	noSig	LOC101736456
1339	KWMTBOMO01339	0	0	0	1.00e+00	1	-7.814	L5D6_OR_VS_L5D6_Ctr	noSig	NA
1340	KWMTBOMO01340	-2.548	3.511	-25.858	5.74e-06	0.00133	5.162	L5D6_OR_VS_L5D6_Ctr	down	NA
1341	KWMTBOMO01341	-3.286	2.913	-49.114	3.46e-07	0.000532	7.495	L5D6_OR_VS_L5D6_Ctr	down	LOC101736421
1342	KWMTBOMO01342	-0.154	0.119	-1.329	2.49e-01	0.578	-6.904	L5D6_OR_VS_L5D6_Ctr	noSig	LOC101739349
1343	KWMTBOMO01343	-0.108	0.101	-1.445	2.16e-01	0.521	-6.767	L5D6_OR_VS_L5D6_Ctr	noSig	LOC101737180
1344	KWMTBOMO01344	-0.593	2.713	-3.329	2.53e-02	0.113	-4.429	L5D6_OR_VS_L5D6_Ctr	noSig	LOC101736064
1345	KWMTBOMO01345	0.421	0.359	1.454	2.13e-01	0.517	-6.756	L5D6_OR_VS_L5D6_Ctr	noSig	LOC101735939
1346	KWMTBOMO01346	-1.091	3.472	-6.633	1.91e-03	0.0193	-1.388	L5D6_OR_VS_L5D6_Ctr	down	LOC101735811
1347	KWMTBOMO01347	0.171	2.395	1.05	3.48e-01	0.631	-7.211	L5D6_OR_VS_L5D6_Ctr	noSig	LOC101735666
1348	KWMTBOMO01348	-0.181	0.359	-0.706	5.16e-01	0.833	-7.524	L5D6_OR_VS_L5D6_Ctr	noSig	NA
1349	KWMTBOMO01349	-0.134	0.067	-1.841	1.33e-01	0.37	-6.275	L5D6_OR_VS_L5D6_Ctr	noSig	LOC101735348
1350	KWMTBOMO01350	-0.231	0.275	-1.099	3.28e-01	0.631	-7.159	L5D6_OR_VS_L5D6_Ctr	noSig	NA
1351	KWMTBOMO01351	-0.655	6.024	-6.19	2.53e-03	0.0231	-1.72	L5D6_OR_VS_L5D6_Ctr	down	LOC101746919
1352	KWMTBOMO01352	-0.42	3.415	-1.465	2.11e-01	0.512	-6.744	L5D6_OR_VS_L5D6_Ctr	noSig	LOC101747049
1353	KWMTBOMO01353	-0.099	0.48	-0.468	6.62e-01	0.993	-7.683	L5D6_OR_VS_L5D6_Ctr	noSig	LOC101736021
1354	KWMTBOMO01354	-0.261	1.763	-3.632	1.88e-02	0.0911	-4.087	L5D6_OR_VS_L5D6_Ctr	noSig	LOC101735893
1355	KWMTBOMO01355	0.144	1.055	0.791	4.69e-01	0.777	-7.455	L5D6_OR_VS_L5D6_Ctr	noSig	LOC101746778
1356	KWMTBOMO01356	0	0	0	1.00e+00	1	-7.814	L5D6_OR_VS_L5D6_Ctr	noSig	NA
1357	KWMTBOMO01357	0	0	0	1.00e+00	1	-7.814	L5D6_OR_VS_L5D6_Ctr	noSig	LOC101735622
1358	KWMTBOMO01358	0.126	0.162	1.204	2.89e-01	0.631	-7.046	L5D6_OR_VS_L5D6_Ctr	noSig	LOC101739034
1359	KWMTBOMO01359	-1.413	3.402	-5.416	4.29e-03	0.0326	-2.347	L5D6_OR_VS_L5D6_Ctr	down	LOC101746494
1360	KWMTBOMO01360	-0.479	0.366	-2.386	6.98e-02	0.24	-5.578	L5D6_OR_VS_L5D6_Ctr	noSig	LOC101746638
1361	KWMTBOMO01361	-0.907	4.177	-6.687	1.85e-03	0.0189	-1.349	L5D6_OR_VS_L5D6_Ctr	down	LOC732883
1362	KWMTBOMO01362	-0.454	1.745	-2.008	1.09e-01	0.322	-6.062	L5D6_OR_VS_L5D6_Ctr	noSig	LOC101746212
1363	KWMTBOMO01363	0	0	0	1.00e+00	1	-7.814	L5D6_OR_VS_L5D6_Ctr	noSig	twi
1364	KWMTBOMO01364	-0.046	0.033	-1.451	2.14e-01	0.518	-6.76	L5D6_OR_VS_L5D6_Ctr	noSig	NA
1365	KWMTBOMO01365	-0.131	0.668	-0.688	5.26e-01	0.845	-7.538	L5D6_OR_VS_L5D6_Ctr	noSig	LOC101745736
1366	KWMTBOMO01366	-0.969	2.385	-7.037	1.50e-03	0.0165	-1.102	L5D6_OR_VS_L5D6_Ctr	down	LOC101745979
1367	KWMTBOMO01367	-0.738	2.579	-11.183	2.16e-04	0.00554	1.187	L5D6_OR_VS_L5D6_Ctr	down	LOC101745583
1368	KWMTBOMO01368	-0.398	2.938	-1.238	2.78e-01	0.626	-7.008	L5D6_OR_VS_L5D6_Ctr	noSig	LOC110386132
1369	KWMTBOMO01369	0	0	0	1.00e+00	1	-7.814	L5D6_OR_VS_L5D6_Ctr	noSig	LOC101735487
1370	KWMTBOMO01370	-0.083	0.65	-0.588	5.85e-01	0.913	-7.609	L5D6_OR_VS_L5D6_Ctr	noSig	LOC101745440
1371	KWMTBOMO01371	0.185	0.093	1.048	3.49e-01	0.631	-7.213	L5D6_OR_VS_L5D6_Ctr	noSig	LOC101745197
1372	KWMTBOMO01372	-0.607	0.593	-5.342	4.53e-03	0.0338	-2.411	L5D6_OR_VS_L5D6_Ctr	down	NA
1373	KWMTBOMO01373	-0.189	0.094	-1.048	3.49e-01	0.631	-7.213	L5D6_OR_VS_L5D6_Ctr	noSig	NA
1374	KWMTBOMO01374	0.01	0.046	0.208	8.45e-01	1	-7.787	L5D6_OR_VS_L5D6_Ctr	noSig	NA
1375	KWMTBOMO01375	0.174	0.965	0.61	5.72e-01	0.898	-7.595	L5D6_OR_VS_L5D6_Ctr	noSig	LOC101745050
1376	KWMTBOMO01376	-0.054	0.142	-0.426	6.90e-01	1	-7.705	L5D6_OR_VS_L5D6_Ctr	noSig	LOC101744815
1377	KWMTBOMO01377	0	0	0	1.00e+00	1	-7.814	L5D6_OR_VS_L5D6_Ctr	noSig	NA
1378	KWMTBOMO01378	0	0	0	1.00e+00	1	-7.814	L5D6_OR_VS_L5D6_Ctr	noSig	LOC101744577
1379	KWMTBOMO01379	-0.403	1.886	-2.24	8.26e-02	0.271	-5.764	L5D6_OR_VS_L5D6_Ctr	noSig	LOC101744429
1380	KWMTBOMO01380	0.527	1.474	1.238	2.78e-01	0.626	-7.008	L5D6_OR_VS_L5D6_Ctr	noSig	NA
1381	KWMTBOMO01381	1.938	12.602	20.01	1.76e-05	0.00208	4.013	L5D6_OR_VS_L5D6_Ctr	up	RpL37A
1382	KWMTBOMO01382	-0.975	2.021	-5.917	3.03e-03	0.0261	-1.934	L5D6_OR_VS_L5D6_Ctr	down	LOC101744286
1383	KWMTBOMO01383	0.584	1.857	2.458	6.42e-02	0.226	-5.487	L5D6_OR_VS_L5D6_Ctr	noSig	NA
1384	KWMTBOMO01384	0.55	2.516	5.758	3.38e-03	0.028	-2.062	L5D6_OR_VS_L5D6_Ctr	up	LOC101744145
1385	KWMTBOMO01385	0.172	2.763	4.921	6.22e-03	0.0419	-2.786	L5D6_OR_VS_L5D6_Ctr	noSig	LOC101744000
1386	KWMTBOMO01386	-0.111	0.074	-0.886	4.21e-01	0.718	-7.371	L5D6_OR_VS_L5D6_Ctr	noSig	K5
1387	KWMTBOMO01387	-0.594	1.288	-4.176	1.15e-02	0.0644	-3.508	L5D6_OR_VS_L5D6_Ctr	noSig	LOC101743700
1388	KWMTBOMO01388	0	0	0	1.00e+00	1	-7.814	L5D6_OR_VS_L5D6_Ctr	noSig	NA
1389	KWMTBOMO01389	-0.035	0.046	-0.531	6.21e-01	0.95	-7.646	L5D6_OR_VS_L5D6_Ctr	noSig	LOC105842405
1390	KWMTBOMO01390	0.527	0.335	4.699	7.41e-03	0.0474	-2.993	L5D6_OR_VS_L5D6_Ctr	up	LOC101735349
1391	KWMTBOMO01391	0.092	0.065	2.866	4.09e-02	0.161	-4.979	L5D6_OR_VS_L5D6_Ctr	noSig	LOC110385653
1392	KWMTBOMO01392	0	0	0	1.00e+00	1	-7.814	L5D6_OR_VS_L5D6_Ctr	noSig	LOC101743472
1393	KWMTBOMO01393	-0.102	0.258	-0.328	7.58e-01	1	-7.749	L5D6_OR_VS_L5D6_Ctr	noSig	NA
1394	KWMTBOMO01394	0.067	0.034	1.047	3.49e-01	0.631	-7.214	L5D6_OR_VS_L5D6_Ctr	noSig	Run
1395	KWMTBOMO01395	-0.223	0.199	-2.591	5.53e-02	0.202	-5.32	L5D6_OR_VS_L5D6_Ctr	noSig	LOC101747006
1396	KWMTBOMO01396	-0.247	4.012	-2.083	9.94e-02	0.304	-5.965	L5D6_OR_VS_L5D6_Ctr	noSig	LOC101743092
1397	KWMTBOMO01397	0.001	0.277	0.004	9.97e-01	1	-7.814	L5D6_OR_VS_L5D6_Ctr	noSig	LOC101746731
1398	KWMTBOMO01398	-0.251	0.291	-1.132	3.16e-01	0.631	-7.124	L5D6_OR_VS_L5D6_Ctr	noSig	Mf-cpa
1399	KWMTBOMO01399	-0.007	0.179	-0.035	9.74e-01	1	-7.813	L5D6_OR_VS_L5D6_Ctr	noSig	NA
1400	KWMTBOMO01400	-0.319	1.084	-3.867	1.51e-02	0.0778	-3.832	L5D6_OR_VS_L5D6_Ctr	noSig	LOC101742807
1401	KWMTBOMO01401	0.018	0.489	0.067	9.50e-01	1	-7.811	L5D6_OR_VS_L5D6_Ctr	noSig	LOC101742559
1402	KWMTBOMO01402	-0.011	0.387	-0.103	9.23e-01	1	-7.807	L5D6_OR_VS_L5D6_Ctr	noSig	LOC101742413
1403	KWMTBOMO01403	-0.312	1.958	-1.166	3.03e-01	0.631	-7.088	L5D6_OR_VS_L5D6_Ctr	noSig	LOC101746590
1404	KWMTBOMO01404	0	0	0	1.00e+00	1	-7.814	L5D6_OR_VS_L5D6_Ctr	noSig	LOC110386274
1405	KWMTBOMO01405	0	0	0	1.00e+00	1	-7.814	L5D6_OR_VS_L5D6_Ctr	noSig	LOC101746308
1406	KWMTBOMO01406	2.444	1.488	8.054	8.63e-04	0.0119	-0.442	L5D6_OR_VS_L5D6_Ctr	up	LOC732955
1407	KWMTBOMO01407	-0.334	3.339	-1.81	1.38e-01	0.38	-6.315	L5D6_OR_VS_L5D6_Ctr	noSig	LOC101742077
1408	KWMTBOMO01408	-1.578	6.976	-5.376	4.42e-03	0.0332	-2.382	L5D6_OR_VS_L5D6_Ctr	down	E(spl)mbeta
1409	KWMTBOMO01409	-1.061	0.85	-4.055	1.28e-02	0.0693	-3.633	L5D6_OR_VS_L5D6_Ctr	noSig	E(spl)malpha
1410	KWMTBOMO01410	0	0	0	1.00e+00	1	-7.814	L5D6_OR_VS_L5D6_Ctr	noSig	NA
1411	KWMTBOMO01411	-0.081	0.108	-0.52	6.28e-01	0.958	-7.653	L5D6_OR_VS_L5D6_Ctr	noSig	LOC101741933
1412	KWMTBOMO01412	-1.431	1.179	-9.326	4.67e-04	0.00856	0.284	L5D6_OR_VS_L5D6_Ctr	down	LOC101741784
1413	KWMTBOMO01413	0.065	0.033	2.093	9.83e-02	0.304	-5.953	L5D6_OR_VS_L5D6_Ctr	noSig	LOC100302605
1414	KWMTBOMO01414	0.111	0.405	1.534	1.93e-01	0.483	-6.659	L5D6_OR_VS_L5D6_Ctr	noSig	LOC100302603
1415	KWMTBOMO01415	1.421	1.317	2.438	6.57e-02	0.229	-5.512	L5D6_OR_VS_L5D6_Ctr	noSig	NA
1416	KWMTBOMO01416	0	0	0	1.00e+00	1	-7.814	L5D6_OR_VS_L5D6_Ctr	noSig	NA
1417	KWMTBOMO01417	0	0	0	1.00e+00	1	-7.814	L5D6_OR_VS_L5D6_Ctr	noSig	LOC101740981
1418	KWMTBOMO01418	0	0	0	1.00e+00	1	-7.814	L5D6_OR_VS_L5D6_Ctr	noSig	LOC101741123
1419	KWMTBOMO01419	0.023	0.012	1.046	3.50e-01	0.631	-7.216	L5D6_OR_VS_L5D6_Ctr	noSig	LOC101746018
1420	KWMTBOMO01420	0.037	3.953	0.574	5.94e-01	0.922	-7.619	L5D6_OR_VS_L5D6_Ctr	noSig	LOC100174851
1421	KWMTBOMO01421	-0.01	0.014	-0.736	4.99e-01	0.813	-7.5	L5D6_OR_VS_L5D6_Ctr	noSig	LOC101745882
1422	KWMTBOMO01422	-0.007	0.213	-0.081	9.39e-01	1	-7.81	L5D6_OR_VS_L5D6_Ctr	noSig	LOC101740837
1423	KWMTBOMO01423	-0.854	3.775	-11.953	1.63e-04	0.00491	1.518	L5D6_OR_VS_L5D6_Ctr	down	LOC101740562
1424	KWMTBOMO01424	0.454	11.148	6.38	2.24e-03	0.0214	-1.575	L5D6_OR_VS_L5D6_Ctr	noSig	Ef1beta
1425	KWMTBOMO01425	0.656	1.975	2.236	8.30e-02	0.272	-5.77	L5D6_OR_VS_L5D6_Ctr	noSig	LOC101740340
1426	KWMTBOMO01426	-0.089	0.144	-0.437	6.83e-01	1	-7.699	L5D6_OR_VS_L5D6_Ctr	noSig	NA
1427	KWMTBOMO01427	0	0	0	1.00e+00	1	-7.814	L5D6_OR_VS_L5D6_Ctr	noSig	LOC101745584
1428	KWMTBOMO01428	-0.288	2.72	-1.071	3.40e-01	0.631	-7.189	L5D6_OR_VS_L5D6_Ctr	noSig	NA
1429	KWMTBOMO01429	0.252	2.076	1.297	2.59e-01	0.594	-6.941	L5D6_OR_VS_L5D6_Ctr	noSig	LOC101745441
1430	KWMTBOMO01430	-0.499	2.135	-2.547	5.81e-02	0.209	-5.375	L5D6_OR_VS_L5D6_Ctr	noSig	LOC101740208
1431	KWMTBOMO01431	0.465	5.276	3.105	3.18e-02	0.134	-4.692	L5D6_OR_VS_L5D6_Ctr	noSig	LOC101739703
1432	KWMTBOMO01432	0	0	0	1.00e+00	1	-7.814	L5D6_OR_VS_L5D6_Ctr	noSig	LOC101745301
1433	KWMTBOMO01433	-1.397	2.445	-11.205	2.14e-04	0.00553	1.197	L5D6_OR_VS_L5D6_Ctr	down	LOC101739559
1434	KWMTBOMO01434	-0.895	1.87	-10.803	2.51e-04	0.00602	1.015	L5D6_OR_VS_L5D6_Ctr	down	LOC101739194
1435	KWMTBOMO01435	-0.43	1.997	-3.091	3.23e-02	0.135	-4.708	L5D6_OR_VS_L5D6_Ctr	noSig	TOR2
1436	KWMTBOMO01436	-0.764	7.895	-7.924	9.23e-04	0.0123	-0.522	L5D6_OR_VS_L5D6_Ctr	down	LOC692798
1437	KWMTBOMO01437	-0.499	1.364	-5.647	3.64e-03	0.0293	-2.153	L5D6_OR_VS_L5D6_Ctr	noSig	TOR1
1438	KWMTBOMO01438	-0.761	3.829	-7.358	1.25e-03	0.0148	-0.885	L5D6_OR_VS_L5D6_Ctr	down	NA
1439	KWMTBOMO01439	-0.971	4.263	-12.48	1.35e-04	0.00453	1.732	L5D6_OR_VS_L5D6_Ctr	down	LOC101739047
1440	KWMTBOMO01440	-0.418	4.137	-2.839	4.21e-02	0.165	-5.012	L5D6_OR_VS_L5D6_Ctr	noSig	LOC101738677
1441	KWMTBOMO01441	0	0	0	1.00e+00	1	-7.814	L5D6_OR_VS_L5D6_Ctr	noSig	LOC101738547
1442	KWMTBOMO01442	-0.136	0.127	-0.701	5.19e-01	0.837	-7.528	L5D6_OR_VS_L5D6_Ctr	noSig	LOC101738413
1443	KWMTBOMO01443	0	0	0	1.00e+00	1	-7.814	L5D6_OR_VS_L5D6_Ctr	noSig	NA
1444	KWMTBOMO01444	-0.741	3.898	-8.379	7.32e-04	0.0108	-0.247	L5D6_OR_VS_L5D6_Ctr	down	LOC101745004
1445	KWMTBOMO01445	-0.686	0.831	-2.293	7.77e-02	0.259	-5.697	L5D6_OR_VS_L5D6_Ctr	noSig	LOC101738183
1446	KWMTBOMO01446	0.018	0.217	0.336	7.52e-01	1	-7.745	L5D6_OR_VS_L5D6_Ctr	noSig	LOC101744865
1447	KWMTBOMO01447	-0.117	0.35	-0.598	5.79e-01	0.906	-7.603	L5D6_OR_VS_L5D6_Ctr	noSig	NA
1448	KWMTBOMO01448	0	0	0	1.00e+00	1	-7.814	L5D6_OR_VS_L5D6_Ctr	noSig	LOC101738056
1449	KWMTBOMO01449	0	0	0	1.00e+00	1	-7.814	L5D6_OR_VS_L5D6_Ctr	noSig	NA
1450	KWMTBOMO01450	0	0	0	1.00e+00	1	-7.814	L5D6_OR_VS_L5D6_Ctr	noSig	NA
1451	KWMTBOMO01451	0.019	0.009	1.044	3.50e-01	0.631	-7.217	L5D6_OR_VS_L5D6_Ctr	noSig	NA
1452	KWMTBOMO01452	-1.2	3.66	-8.378	7.32e-04	0.0108	-0.247	L5D6_OR_VS_L5D6_Ctr	down	LOC101737924
1453	KWMTBOMO01453	0.41	0.629	1.535	1.93e-01	0.483	-6.658	L5D6_OR_VS_L5D6_Ctr	noSig	LOC101737791
1454	KWMTBOMO01454	-0.285	0.253	-1.476	2.08e-01	0.507	-6.729	L5D6_OR_VS_L5D6_Ctr	noSig	NA
1455	KWMTBOMO01455	-0.205	0.377	-0.431	6.87e-01	1	-7.702	L5D6_OR_VS_L5D6_Ctr	noSig	LOC101737653
1456	KWMTBOMO01456	-1.205	1.43	-14.256	7.63e-05	0.00344	2.388	L5D6_OR_VS_L5D6_Ctr	down	LOC101744578
1457	KWMTBOMO01457	-0.994	1.581	-7.323	1.28e-03	0.015	-0.909	L5D6_OR_VS_L5D6_Ctr	down	NA
1458	KWMTBOMO01458	0.014	0.007	1.042	3.51e-01	0.631	-7.219	L5D6_OR_VS_L5D6_Ctr	noSig	LOC101737512
1459	KWMTBOMO01459	0	0	0	1.00e+00	1	-7.814	L5D6_OR_VS_L5D6_Ctr	noSig	NA
1460	KWMTBOMO01460	0	0	0	1.00e+00	1	-7.814	L5D6_OR_VS_L5D6_Ctr	noSig	NA
1461	KWMTBOMO01461	-0.041	0.112	-0.472	6.59e-01	0.991	-7.681	L5D6_OR_VS_L5D6_Ctr	noSig	NA
1462	KWMTBOMO01462	0	0	0	1.00e+00	1	-7.814	L5D6_OR_VS_L5D6_Ctr	noSig	NGR-A34
1463	KWMTBOMO01463	-0.041	0.021	-1.047	3.49e-01	0.631	-7.214	L5D6_OR_VS_L5D6_Ctr	noSig	LOC101737373
1464	KWMTBOMO01464	0	0	0	1.00e+00	1	-7.814	L5D6_OR_VS_L5D6_Ctr	noSig	LOC101744430
1465	KWMTBOMO01465	0	0	0	1.00e+00	1	-7.814	L5D6_OR_VS_L5D6_Ctr	noSig	LOC101744146
1466	KWMTBOMO01466	0.059	0.029	1.047	3.49e-01	0.631	-7.214	L5D6_OR_VS_L5D6_Ctr	noSig	LOC105842389
1467	KWMTBOMO01467	0	0	0	1.00e+00	1	-7.814	L5D6_OR_VS_L5D6_Ctr	noSig	LOC105842394
1468	KWMTBOMO01468	0.241	1.635	0.848	4.40e-01	0.742	-7.406	L5D6_OR_VS_L5D6_Ctr	noSig	LOC101744001
1469	KWMTBOMO01469	0	0	0	1.00e+00	1	-7.814	L5D6_OR_VS_L5D6_Ctr	noSig	NA
1470	KWMTBOMO01470	0.019	0.009	1.044	3.50e-01	0.631	-7.217	L5D6_OR_VS_L5D6_Ctr	noSig	NGR-A15
1471	KWMTBOMO01471	-0.398	0.327	-8.663	6.37e-04	0.00995	-0.082	L5D6_OR_VS_L5D6_Ctr	noSig	NA
1472	KWMTBOMO01472	-0.35	4.613	-1.803	1.39e-01	0.382	-6.323	L5D6_OR_VS_L5D6_Ctr	noSig	LOC101735414
1473	KWMTBOMO01473	-2.989	2.106	-18.629	2.40e-05	0.00234	3.678	L5D6_OR_VS_L5D6_Ctr	down	ATOH8
1474	KWMTBOMO01474	-0.08	0.04	-1.048	3.49e-01	0.631	-7.213	L5D6_OR_VS_L5D6_Ctr	noSig	NA
1475	KWMTBOMO01475	0.01	0.005	1.035	3.54e-01	0.631	-7.226	L5D6_OR_VS_L5D6_Ctr	noSig	NA
1476	KWMTBOMO01476	0.139	0.137	0.814	4.57e-01	0.763	-7.435	L5D6_OR_VS_L5D6_Ctr	noSig	LOC101744454
1477	KWMTBOMO01477	0.092	0.046	1.048	3.49e-01	0.631	-7.213	L5D6_OR_VS_L5D6_Ctr	noSig	NA
1478	KWMTBOMO01478	-0.126	0.063	-1.048	3.49e-01	0.631	-7.213	L5D6_OR_VS_L5D6_Ctr	noSig	LOC101744216
1479	KWMTBOMO01479	-0.729	2.909	-1.763	1.46e-01	0.395	-6.374	L5D6_OR_VS_L5D6_Ctr	noSig	LOC101744073
1480	KWMTBOMO01480	-0.261	2.327	-1.364	2.38e-01	0.56	-6.863	L5D6_OR_VS_L5D6_Ctr	noSig	LOC101743924
1481	KWMTBOMO01481	-0.37	3.542	-2.435	6.59e-02	0.23	-5.515	L5D6_OR_VS_L5D6_Ctr	noSig	LOC101743775
1482	KWMTBOMO01482	0.83	2.002	6.713	1.82e-03	0.0187	-1.331	L5D6_OR_VS_L5D6_Ctr	up	LOC110384926
1483	KWMTBOMO01483	0.333	0.167	1.048	3.49e-01	0.631	-7.213	L5D6_OR_VS_L5D6_Ctr	noSig	LOC101743069
1484	KWMTBOMO01484	0.247	0.586	0.712	5.12e-01	0.829	-7.519	L5D6_OR_VS_L5D6_Ctr	noSig	LOC101742927
1485	KWMTBOMO01485	-0.292	1.11	-1.258	2.71e-01	0.616	-6.985	L5D6_OR_VS_L5D6_Ctr	noSig	LOC101742776
1486	KWMTBOMO01486	-1.231	4.179	-9.174	5.01e-04	0.00879	0.202	L5D6_OR_VS_L5D6_Ctr	down	LOC101742633
1487	KWMTBOMO01487	-1.206	1.54	-5.553	3.89e-03	0.0306	-2.231	L5D6_OR_VS_L5D6_Ctr	down	LOC101742487
1488	KWMTBOMO01488	-0.783	3.469	-4.002	1.34e-02	0.0714	-3.688	L5D6_OR_VS_L5D6_Ctr	noSig	LOC101742149
1489	KWMTBOMO01489	-0.958	3.562	-4.497	8.73e-03	0.053	-3.187	L5D6_OR_VS_L5D6_Ctr	noSig	NA
1490	KWMTBOMO01490	0.067	0.034	1.047	3.49e-01	0.631	-7.214	L5D6_OR_VS_L5D6_Ctr	noSig	LOC101747070
1491	KWMTBOMO01491	-0.483	2.698	-2.114	9.59e-02	0.302	-5.926	L5D6_OR_VS_L5D6_Ctr	noSig	LOC101742007
1492	KWMTBOMO01492	0.014	0.007	1.042	3.51e-01	0.631	-7.219	L5D6_OR_VS_L5D6_Ctr	noSig	NA
1493	KWMTBOMO01493	0	0	0	1.00e+00	1	-7.814	L5D6_OR_VS_L5D6_Ctr	noSig	NA
1494	KWMTBOMO01494	-0.477	0.818	-2.051	1.03e-01	0.31	-6.006	L5D6_OR_VS_L5D6_Ctr	noSig	LOC101741857
1495	KWMTBOMO01495	0	0	0	1.00e+00	1	-7.814	L5D6_OR_VS_L5D6_Ctr	noSig	LOC101741709
1496	KWMTBOMO01496	0	0	0	1.00e+00	1	-7.814	L5D6_OR_VS_L5D6_Ctr	noSig	NA
1497	KWMTBOMO01497	0	0	0	1.00e+00	1	-7.814	L5D6_OR_VS_L5D6_Ctr	noSig	LOC101741563
1498	KWMTBOMO01498	0	0	0	1.00e+00	1	-7.814	L5D6_OR_VS_L5D6_Ctr	noSig	NA
1499	KWMTBOMO01499	-0.043	0.127	-0.445	6.77e-01	1	-7.695	L5D6_OR_VS_L5D6_Ctr	noSig	NA
1500	KWMTBOMO01500	-0.043	0.214	-0.4	7.08e-01	1	-7.717	L5D6_OR_VS_L5D6_Ctr	noSig	NA
1501	KWMTBOMO01501	0	0	0	1.00e+00	1	-7.814	L5D6_OR_VS_L5D6_Ctr	noSig	LOC101741290
1502	KWMTBOMO01502	-0.883	6.489	-2.147	9.22e-02	0.294	-5.884	L5D6_OR_VS_L5D6_Ctr	noSig	GSTs2
1503	KWMTBOMO01503	-0.143	0.185	-1.068	3.41e-01	0.631	-7.193	L5D6_OR_VS_L5D6_Ctr	noSig	GSTs1
1504	KWMTBOMO01504	0	0	0	1.00e+00	1	-7.814	L5D6_OR_VS_L5D6_Ctr	noSig	LOC105841373
1505	KWMTBOMO01505	-0.485	1.858	-2.287	7.82e-02	0.26	-5.704	L5D6_OR_VS_L5D6_Ctr	noSig	LOC101741054
1506	KWMTBOMO01506	-0.937	1.516	-4.653	7.69e-03	0.0486	-3.037	L5D6_OR_VS_L5D6_Ctr	down	LOC101740913
1507	KWMTBOMO01507	0	0	0	1.00e+00	1	-7.814	L5D6_OR_VS_L5D6_Ctr	noSig	NA
1508	KWMTBOMO01508	0	0	0	1.00e+00	1	-7.814	L5D6_OR_VS_L5D6_Ctr	noSig	LOC101746937
1509	KWMTBOMO01509	0	0	0	1.00e+00	1	-7.814	L5D6_OR_VS_L5D6_Ctr	noSig	NA
1510	KWMTBOMO01510	0	0	0	1.00e+00	1	-7.814	L5D6_OR_VS_L5D6_Ctr	noSig	LOC101746797
1511	KWMTBOMO01511	0	0	0	1.00e+00	1	-7.814	L5D6_OR_VS_L5D6_Ctr	noSig	LOC101746657
1512	KWMTBOMO01512	-0.044	1.019	-0.144	8.92e-01	1	-7.801	L5D6_OR_VS_L5D6_Ctr	noSig	LOC101740774
1513	KWMTBOMO01513	-0.114	2.966	-1.124	3.19e-01	0.631	-7.134	L5D6_OR_VS_L5D6_Ctr	noSig	LOC101744016
1514	KWMTBOMO01514	-0.059	0.029	-1.047	3.49e-01	0.631	-7.214	L5D6_OR_VS_L5D6_Ctr	noSig	NA
1515	KWMTBOMO01515	0.053	2.325	0.209	8.44e-01	1	-7.787	L5D6_OR_VS_L5D6_Ctr	noSig	NA
1516	KWMTBOMO01516	0.281	4.269	2.399	6.87e-02	0.237	-5.562	L5D6_OR_VS_L5D6_Ctr	noSig	Scpx
1517	KWMTBOMO01517	0	0	0	1.00e+00	1	-7.814	L5D6_OR_VS_L5D6_Ctr	noSig	LOC101740400
1518	KWMTBOMO01518	-0.208	2.926	-2.191	8.75e-02	0.283	-5.827	L5D6_OR_VS_L5D6_Ctr	noSig	LOC101746516
1519	KWMTBOMO01519	-0.658	8.267	-10.191	3.21e-04	0.00686	0.725	L5D6_OR_VS_L5D6_Ctr	down	LOC101740269
1520	KWMTBOMO01520	-1.504	3.559	-4.743	7.15e-03	0.0461	-2.951	L5D6_OR_VS_L5D6_Ctr	down	NA
1521	KWMTBOMO01521	-3.127	5.198	-9.746	3.88e-04	0.00766	0.503	L5D6_OR_VS_L5D6_Ctr	down	LOC105842814
1522	KWMTBOMO01522	-2.721	6.927	-19.379	2.02e-05	0.00212	3.863	L5D6_OR_VS_L5D6_Ctr	down	LOC101739953
1523	KWMTBOMO01523	0	0	0	1.00e+00	1	-7.814	L5D6_OR_VS_L5D6_Ctr	noSig	LOC101746379
1524	KWMTBOMO01524	0.071	0.036	1.047	3.49e-01	0.631	-7.214	L5D6_OR_VS_L5D6_Ctr	noSig	LOC101739816
1525	KWMTBOMO01525	0.304	0.303	1.67	1.64e-01	0.431	-6.491	L5D6_OR_VS_L5D6_Ctr	noSig	LOC101739676
1526	KWMTBOMO01526	0	0	0	1.00e+00	1	-7.814	L5D6_OR_VS_L5D6_Ctr	noSig	LOC101746240
1527	KWMTBOMO01527	0	0	0	1.00e+00	1	-7.814	L5D6_OR_VS_L5D6_Ctr	noSig	LOC110384922
1528	KWMTBOMO01528	0.234	0.117	12.069	1.56e-04	0.0048	1.566	L5D6_OR_VS_L5D6_Ctr	noSig	LOC101739533
1529	KWMTBOMO01529	0	0	0	1.00e+00	1	-7.814	L5D6_OR_VS_L5D6_Ctr	noSig	LOC101739392
1530	KWMTBOMO01530	-0.679	4.307	-2.316	7.56e-02	0.254	-5.667	L5D6_OR_VS_L5D6_Ctr	noSig	NA
1531	KWMTBOMO01531	0.329	3.609	1.739	1.51e-01	0.403	-6.404	L5D6_OR_VS_L5D6_Ctr	noSig	LOC101739068
1532	KWMTBOMO01532	-0.947	1.621	-10.69	2.62e-04	0.00616	0.962	L5D6_OR_VS_L5D6_Ctr	down	LOC101746096
1533	KWMTBOMO01533	-0.557	1.756	-5.786	3.31e-03	0.0277	-2.039	L5D6_OR_VS_L5D6_Ctr	down	LOC101745952
1534	KWMTBOMO01534	-0.109	1.884	-0.549	6.10e-01	0.939	-7.635	L5D6_OR_VS_L5D6_Ctr	noSig	LOC101738928
1535	KWMTBOMO01535	0	0	0	1.00e+00	1	-7.814	L5D6_OR_VS_L5D6_Ctr	noSig	LOC110384920
1536	KWMTBOMO01536	0.459	0.23	2.89	3.99e-02	0.158	-4.95	L5D6_OR_VS_L5D6_Ctr	noSig	LOC101738792
1537	KWMTBOMO01537	0.13	0.065	1.048	3.49e-01	0.631	-7.213	L5D6_OR_VS_L5D6_Ctr	noSig	LOC101738434
1538	KWMTBOMO01538	1.807	0.904	4.357	9.82e-03	0.0578	-3.325	L5D6_OR_VS_L5D6_Ctr	noSig	LOC101738654
1539	KWMTBOMO01539	0.009	0.019	0.353	7.41e-01	1	-7.739	L5D6_OR_VS_L5D6_Ctr	noSig	NA
1540	KWMTBOMO01540	-0.15	0.144	-1.181	2.98e-01	0.631	-7.071	L5D6_OR_VS_L5D6_Ctr	noSig	NA
1541	KWMTBOMO01541	0	0	0	1.00e+00	1	-7.814	L5D6_OR_VS_L5D6_Ctr	noSig	SPI37
1542	KWMTBOMO01542	0.749	0.374	3.851	1.53e-02	0.0786	-3.848	L5D6_OR_VS_L5D6_Ctr	noSig	LOC101738162
1543	KWMTBOMO01543	-1.641	2.167	-7.362	1.25e-03	0.0148	-0.882	L5D6_OR_VS_L5D6_Ctr	down	LOC101738036
1544	KWMTBOMO01544	-0.027	0.091	-0.332	7.55e-01	1	-7.747	L5D6_OR_VS_L5D6_Ctr	noSig	NA
1545	KWMTBOMO01545	-0.255	0.128	-1.048	3.49e-01	0.631	-7.213	L5D6_OR_VS_L5D6_Ctr	noSig	LOC105841375
1546	KWMTBOMO01546	0.199	0.546	1.803	1.39e-01	0.382	-6.324	L5D6_OR_VS_L5D6_Ctr	noSig	NA
1547	KWMTBOMO01547	0.622	3.895	2.96	3.70e-02	0.15	-4.865	L5D6_OR_VS_L5D6_Ctr	noSig	LOC101745809
1548	KWMTBOMO01548	-0.158	0.378	-0.891	4.19e-01	0.715	-7.366	L5D6_OR_VS_L5D6_Ctr	noSig	NA
1549	KWMTBOMO01549	0.604	3.506	4.011	1.33e-02	0.0711	-3.679	L5D6_OR_VS_L5D6_Ctr	noSig	NA
1550	KWMTBOMO01550	0.137	0.069	1.048	3.49e-01	0.631	-7.213	L5D6_OR_VS_L5D6_Ctr	noSig	LOC101737675
1551	KWMTBOMO01551	0	0	0	1.00e+00	1	-7.814	L5D6_OR_VS_L5D6_Ctr	noSig	LOC101737434
1552	KWMTBOMO01552	0	0	0	1.00e+00	1	-7.814	L5D6_OR_VS_L5D6_Ctr	noSig	NA
1553	KWMTBOMO01553	0	0	0	1.00e+00	1	-7.814	L5D6_OR_VS_L5D6_Ctr	noSig	NA
1554	KWMTBOMO01554	-0.01	0.005	-1.035	3.54e-01	0.631	-7.226	L5D6_OR_VS_L5D6_Ctr	noSig	NA
1555	KWMTBOMO01555	0	0	0	1.00e+00	1	-7.814	L5D6_OR_VS_L5D6_Ctr	noSig	LOC101745659
1556	KWMTBOMO01556	0	0	0	1.00e+00	1	-7.814	L5D6_OR_VS_L5D6_Ctr	noSig	LOC105841377
1557	KWMTBOMO01557	-0.033	0.016	-1.047	3.49e-01	0.631	-7.214	L5D6_OR_VS_L5D6_Ctr	noSig	LOC101745515
1558	KWMTBOMO01558	0	0	0	1.00e+00	1	-7.814	L5D6_OR_VS_L5D6_Ctr	noSig	NA
1559	KWMTBOMO01559	0.041	0.021	1.047	3.49e-01	0.631	-7.214	L5D6_OR_VS_L5D6_Ctr	noSig	NA
1560	KWMTBOMO01560	0	0	0	1.00e+00	1	-7.814	L5D6_OR_VS_L5D6_Ctr	noSig	LOC101745371
1561	KWMTBOMO01561	0.01	0.585	0.086	9.35e-01	1	-7.809	L5D6_OR_VS_L5D6_Ctr	noSig	LOC101736415
1562	KWMTBOMO01562	0.051	0.026	1.9	1.24e-01	0.352	-6.199	L5D6_OR_VS_L5D6_Ctr	noSig	NA
1563	KWMTBOMO01563	-0.486	1.78	-3.307	2.59e-02	0.115	-4.455	L5D6_OR_VS_L5D6_Ctr	noSig	LOC101745221
1564	KWMTBOMO01564	0.125	1.027	0.423	6.92e-01	1	-7.706	L5D6_OR_VS_L5D6_Ctr	noSig	LOC101745072
1565	KWMTBOMO01565	-0.984	2.237	-5.658	3.62e-03	0.0292	-2.144	L5D6_OR_VS_L5D6_Ctr	down	NA
1566	KWMTBOMO01566	0.438	1.003	4.554	8.34e-03	0.0514	-3.132	L5D6_OR_VS_L5D6_Ctr	noSig	LOC105841831
1567	KWMTBOMO01567	-0.624	2.382	-3.225	2.81e-02	0.122	-4.55	L5D6_OR_VS_L5D6_Ctr	noSig	LOC101738850
1568	KWMTBOMO01568	0.038	0.019	2.089	9.88e-02	0.304	-5.958	L5D6_OR_VS_L5D6_Ctr	noSig	LOC100862792
1569	KWMTBOMO01569	0	0	0	1.00e+00	1	-7.814	L5D6_OR_VS_L5D6_Ctr	noSig	LOC101739406
1570	KWMTBOMO01570	0	0	0	1.00e+00	1	-7.814	L5D6_OR_VS_L5D6_Ctr	noSig	LOC101739266
1571	KWMTBOMO01571	-0.004	0.035	-0.101	9.24e-01	1	-7.807	L5D6_OR_VS_L5D6_Ctr	noSig	LOC101738711
1572	KWMTBOMO01572	-0.045	0.22	-1.339	2.46e-01	0.573	-6.893	L5D6_OR_VS_L5D6_Ctr	noSig	LOC101743122
1573	KWMTBOMO01573	0.038	2.349	0.169	8.74e-01	1	-7.796	L5D6_OR_VS_L5D6_Ctr	noSig	LOC101740477
1574	KWMTBOMO01574	-0.362	1.612	-0.914	4.08e-01	0.701	-7.345	L5D6_OR_VS_L5D6_Ctr	noSig	LOC101740616
1575	KWMTBOMO01575	-0.09	0.16	-1.131	3.16e-01	0.631	-7.126	L5D6_OR_VS_L5D6_Ctr	noSig	LOC101739129
1576	KWMTBOMO01576	-0.237	0.152	-6.661	1.88e-03	0.0191	-1.368	L5D6_OR_VS_L5D6_Ctr	noSig	LOC101739824
1577	KWMTBOMO01577	0	0	0	1.00e+00	1	-7.814	L5D6_OR_VS_L5D6_Ctr	noSig	LOC101737907
1578	KWMTBOMO01578	0.106	0.053	4.073	1.26e-02	0.0687	-3.614	L5D6_OR_VS_L5D6_Ctr	noSig	LOC101737769
1579	KWMTBOMO01579	-0.077	2.708	-0.944	3.94e-01	0.682	-7.317	L5D6_OR_VS_L5D6_Ctr	noSig	LOC101737629
1580	KWMTBOMO01580	0	0	0	1.00e+00	1	-7.814	L5D6_OR_VS_L5D6_Ctr	noSig	LOC101737486
1581	KWMTBOMO01581	-0.13	0.065	-1.048	3.49e-01	0.631	-7.213	L5D6_OR_VS_L5D6_Ctr	noSig	Jhdk
1582	KWMTBOMO01582	0	0	0	1.00e+00	1	-7.814	L5D6_OR_VS_L5D6_Ctr	noSig	LOC101737347
1583	KWMTBOMO01583	-0.17	0.132	-3.388	2.39e-02	0.108	-4.362	L5D6_OR_VS_L5D6_Ctr	noSig	NA
1584	KWMTBOMO01584	0.049	0.315	0.14	8.95e-01	1	-7.802	L5D6_OR_VS_L5D6_Ctr	noSig	NA
1585	KWMTBOMO01585	0	0	0	1.00e+00	1	-7.814	L5D6_OR_VS_L5D6_Ctr	noSig	NA
1586	KWMTBOMO01586	-1.163	1.331	-17.294	3.31e-05	0.00241	3.325	L5D6_OR_VS_L5D6_Ctr	down	NA
1587	KWMTBOMO01587	0.01	0.038	0.325	7.60e-01	1	-7.75	L5D6_OR_VS_L5D6_Ctr	noSig	NA
1588	KWMTBOMO01588	-0.375	0.446	-4.308	1.02e-02	0.0596	-3.374	L5D6_OR_VS_L5D6_Ctr	noSig	NA
1589	KWMTBOMO01589	-0.091	0.115	-1.434	2.19e-01	0.526	-6.781	L5D6_OR_VS_L5D6_Ctr	noSig	NA
1590	KWMTBOMO01590	-0.005	0.017	-0.206	8.46e-01	1	-7.788	L5D6_OR_VS_L5D6_Ctr	noSig	NA
1591	KWMTBOMO01591	-1.238	2.991	-8.295	7.63e-04	0.0111	-0.297	L5D6_OR_VS_L5D6_Ctr	down	serpin-15
1592	KWMTBOMO01592	0.041	6.505	0.317	7.66e-01	1	-7.753	L5D6_OR_VS_L5D6_Ctr	noSig	LOC101739125
1593	KWMTBOMO01593	-0.088	0.044	-1.048	3.49e-01	0.631	-7.213	L5D6_OR_VS_L5D6_Ctr	noSig	serpin-20
1594	KWMTBOMO01594	-0.448	0.547	-3.999	1.34e-02	0.0715	-3.692	L5D6_OR_VS_L5D6_Ctr	noSig	LOC105842102
1595	KWMTBOMO01595	0	0	0	1.00e+00	1	-7.814	L5D6_OR_VS_L5D6_Ctr	noSig	LOC101735803
1596	KWMTBOMO01596	0.01	0.005	1.035	3.54e-01	0.631	-7.226	L5D6_OR_VS_L5D6_Ctr	noSig	LOC101738846
1597	KWMTBOMO01597	-0.037	0.019	-1.047	3.49e-01	0.631	-7.214	L5D6_OR_VS_L5D6_Ctr	noSig	LOC101737199
1598	KWMTBOMO01598	-0.009	0.033	-0.203	8.48e-01	1	-7.789	L5D6_OR_VS_L5D6_Ctr	noSig	NA
1599	KWMTBOMO01599	-0.012	0.085	-0.182	8.64e-01	1	-7.793	L5D6_OR_VS_L5D6_Ctr	noSig	NA
1600	KWMTBOMO01600	0.005	0.021	0.16	8.80e-01	1	-7.798	L5D6_OR_VS_L5D6_Ctr	noSig	LOC101738302
1601	KWMTBOMO01601	-0.036	0.028	-0.812	4.58e-01	0.764	-7.437	L5D6_OR_VS_L5D6_Ctr	noSig	NA
1602	KWMTBOMO01602	0.033	0.016	1.047	3.49e-01	0.631	-7.214	L5D6_OR_VS_L5D6_Ctr	noSig	NA
1603	KWMTBOMO01603	0.014	0.007	1.042	3.51e-01	0.631	-7.219	L5D6_OR_VS_L5D6_Ctr	noSig	Alpm
1604	KWMTBOMO01604	-0.088	0.044	-1.048	3.49e-01	0.631	-7.213	L5D6_OR_VS_L5D6_Ctr	noSig	Alps
1605	KWMTBOMO01605	0	0	0	1.00e+00	1	-7.814	L5D6_OR_VS_L5D6_Ctr	noSig	NA
1606	KWMTBOMO01606	1.101	1.161	7.59	1.10e-03	0.0138	-0.733	L5D6_OR_VS_L5D6_Ctr	up	LOC101742458
1607	KWMTBOMO01607	-0.05	0.192	-0.42	6.94e-01	1	-7.708	L5D6_OR_VS_L5D6_Ctr	noSig	LOC101742796
1608	KWMTBOMO01608	0	0	0	1.00e+00	1	-7.814	L5D6_OR_VS_L5D6_Ctr	noSig	LOC101742943
1609	KWMTBOMO01609	0	0	0	1.00e+00	1	-7.814	L5D6_OR_VS_L5D6_Ctr	noSig	LOC100862797
1610	KWMTBOMO01610	-0.027	0.028	-0.651	5.48e-01	0.87	-7.566	L5D6_OR_VS_L5D6_Ctr	noSig	LOC101743082
1611	KWMTBOMO01611	0	0	0	1.00e+00	1	-7.814	L5D6_OR_VS_L5D6_Ctr	noSig	LOC105842097
1612	KWMTBOMO01612	0.037	0.019	1.047	3.49e-01	0.631	-7.214	L5D6_OR_VS_L5D6_Ctr	noSig	LOC101744760
1613	KWMTBOMO01613	-0.124	3.87	-0.859	4.35e-01	0.736	-7.396	L5D6_OR_VS_L5D6_Ctr	noSig	LOC101743230
1614	KWMTBOMO01614	-0.078	0.039	-2.084	9.93e-02	0.304	-5.964	L5D6_OR_VS_L5D6_Ctr	noSig	LOC101744903
1615	KWMTBOMO01615	0	0	0	1.00e+00	1	-7.814	L5D6_OR_VS_L5D6_Ctr	noSig	NA
1616	KWMTBOMO01616	0	0	0	1.00e+00	1	-7.814	L5D6_OR_VS_L5D6_Ctr	noSig	NA
1617	KWMTBOMO01617	0.346	0.635	1.336	2.47e-01	0.575	-6.896	L5D6_OR_VS_L5D6_Ctr	noSig	LOC101743508
1618	KWMTBOMO01618	0.314	3.823	2.04	1.05e-01	0.314	-6.021	L5D6_OR_VS_L5D6_Ctr	noSig	LOC101743741
1619	KWMTBOMO01619	0	0	0	1.00e+00	1	-7.814	L5D6_OR_VS_L5D6_Ctr	noSig	NA
1620	KWMTBOMO01620	-0.224	2.485	-0.977	3.79e-01	0.662	-7.285	L5D6_OR_VS_L5D6_Ctr	noSig	LOC101744183
1621	KWMTBOMO01621	0.664	8.319	3.288	2.64e-02	0.116	-4.477	L5D6_OR_VS_L5D6_Ctr	noSig	LOC105842089
1622	KWMTBOMO01622	1.431	1.527	2.703	4.88e-02	0.184	-5.18	L5D6_OR_VS_L5D6_Ctr	noSig	LOC101744416
1623	KWMTBOMO01623	-0.285	1.656	-1.646	1.69e-01	0.439	-6.521	L5D6_OR_VS_L5D6_Ctr	noSig	NA
1624	KWMTBOMO01624	-1.219	1.53	-5.941	2.98e-03	0.0258	-1.915	L5D6_OR_VS_L5D6_Ctr	down	LOC101745046
1625	KWMTBOMO01625	0.163	4.302	0.904	4.13e-01	0.707	-7.354	L5D6_OR_VS_L5D6_Ctr	noSig	LOC101744566
1626	KWMTBOMO01626	-0.101	0.069	-5.447	4.20e-03	0.0322	-2.321	L5D6_OR_VS_L5D6_Ctr	noSig	LOC101745344
1627	KWMTBOMO01627	0	0	0	1.00e+00	1	-7.814	L5D6_OR_VS_L5D6_Ctr	noSig	LOC101744902
1628	KWMTBOMO01628	0	0	0	1.00e+00	1	-7.814	L5D6_OR_VS_L5D6_Ctr	noSig	NA
1629	KWMTBOMO01629	0	0	0	1.00e+00	1	-7.814	L5D6_OR_VS_L5D6_Ctr	noSig	NA
1630	KWMTBOMO01630	0	0	0	1.00e+00	1	-7.814	L5D6_OR_VS_L5D6_Ctr	noSig	LOC101745623
1631	KWMTBOMO01631	0	0	0	1.00e+00	1	-7.814	L5D6_OR_VS_L5D6_Ctr	noSig	LOC101745917
1632	KWMTBOMO01632	0	0	0	1.00e+00	1	-7.814	L5D6_OR_VS_L5D6_Ctr	noSig	NA
1633	KWMTBOMO01633	0	0	0	1.00e+00	1	-7.814	L5D6_OR_VS_L5D6_Ctr	noSig	LOC101745293
1634	KWMTBOMO01634	-0.003	0.049	-0.062	9.54e-01	1	-7.811	L5D6_OR_VS_L5D6_Ctr	noSig	NA
1635	KWMTBOMO01635	0	0	0	1.00e+00	1	-7.814	L5D6_OR_VS_L5D6_Ctr	noSig	LOC101746347
1636	KWMTBOMO01636	0.01	0.005	1.035	3.54e-01	0.631	-7.226	L5D6_OR_VS_L5D6_Ctr	noSig	LOC110385716
1637	KWMTBOMO01637	-1.357	6.885	-7.803	9.84e-04	0.0129	-0.597	L5D6_OR_VS_L5D6_Ctr	down	NA
1638	KWMTBOMO01638	0	0	0	1.00e+00	1	-7.814	L5D6_OR_VS_L5D6_Ctr	noSig	LOC101745575
1639	KWMTBOMO01639	0	0	0	1.00e+00	1	-7.814	L5D6_OR_VS_L5D6_Ctr	noSig	LOC101745725
1640	KWMTBOMO01640	0	0	0	1.00e+00	1	-7.814	L5D6_OR_VS_L5D6_Ctr	noSig	LOC110385711
1641	KWMTBOMO01641	0.033	0.016	1.047	3.49e-01	0.631	-7.214	L5D6_OR_VS_L5D6_Ctr	noSig	LOC101746632
1642	KWMTBOMO01642	0	0	0	1.00e+00	1	-7.814	L5D6_OR_VS_L5D6_Ctr	noSig	LOC101746012
1643	KWMTBOMO01643	0.051	0.026	2.068	1.01e-01	0.306	-5.985	L5D6_OR_VS_L5D6_Ctr	noSig	LOC101745873
1644	KWMTBOMO01644	0.853	1.606	2.597	5.49e-02	0.201	-5.312	L5D6_OR_VS_L5D6_Ctr	noSig	LOC101746152
1645	KWMTBOMO01645	1.271	4.948	5.396	4.36e-03	0.0329	-2.364	L5D6_OR_VS_L5D6_Ctr	up	LOC692911
1646	KWMTBOMO01646	0.137	0.069	1.048	3.49e-01	0.631	-7.213	L5D6_OR_VS_L5D6_Ctr	noSig	LOC101746301
1647	KWMTBOMO01647	0	0	0	1.00e+00	1	-7.814	L5D6_OR_VS_L5D6_Ctr	noSig	NA
1648	KWMTBOMO01648	0.063	1.502	0.318	7.65e-01	1	-7.752	L5D6_OR_VS_L5D6_Ctr	noSig	LOC101746773
1649	KWMTBOMO01649	0.005	2.355	0.019	9.85e-01	1	-7.813	L5D6_OR_VS_L5D6_Ctr	noSig	LOC110385839
1650	KWMTBOMO01650	0.392	2.771	1.781	1.43e-01	0.389	-6.351	L5D6_OR_VS_L5D6_Ctr	noSig	LOC692874
1651	KWMTBOMO01651	-0.486	0.349	-3.106	3.17e-02	0.134	-4.69	L5D6_OR_VS_L5D6_Ctr	noSig	LOC101746914
1652	KWMTBOMO01652	0	0	0	1.00e+00	1	-7.814	L5D6_OR_VS_L5D6_Ctr	noSig	NA
1653	KWMTBOMO01653	-0.033	0.035	-1.062	3.43e-01	0.631	-7.199	L5D6_OR_VS_L5D6_Ctr	noSig	NA
1654	KWMTBOMO01654	0	0	0	1.00e+00	1	-7.814	L5D6_OR_VS_L5D6_Ctr	noSig	LOC110385707
1655	KWMTBOMO01655	0	0	0	1.00e+00	1	-7.814	L5D6_OR_VS_L5D6_Ctr	noSig	LOC101746771
1656	KWMTBOMO01656	-0.315	3.202	-0.535	6.19e-01	0.948	-7.644	L5D6_OR_VS_L5D6_Ctr	noSig	LOC105842075
1657	KWMTBOMO01657	-1.23	4.039	-5.7	3.51e-03	0.0286	-2.109	L5D6_OR_VS_L5D6_Ctr	down	LOC101746912
1658	KWMTBOMO01658	-0.674	4.877	-8.69	6.28e-04	0.0099	-0.066	L5D6_OR_VS_L5D6_Ctr	down	LOC101747044
1659	KWMTBOMO01659	-0.384	1.268	-7.209	1.36e-03	0.0155	-0.985	L5D6_OR_VS_L5D6_Ctr	noSig	LOC101747045
1660	KWMTBOMO01660	-0.65	1.682	-3.653	1.85e-02	0.0897	-4.063	L5D6_OR_VS_L5D6_Ctr	noSig	LOC101742717
1661	KWMTBOMO01661	-1.373	2.408	-8.239	7.85e-04	0.0113	-0.33	L5D6_OR_VS_L5D6_Ctr	down	LOC105842573
1662	KWMTBOMO01662	-0.645	6.039	-6.42	2.18e-03	0.021	-1.545	L5D6_OR_VS_L5D6_Ctr	down	LOC733058
1663	KWMTBOMO01663	0.056	1.682	0.355	7.39e-01	1	-7.738	L5D6_OR_VS_L5D6_Ctr	noSig	LOC101747183
1664	KWMTBOMO01664	0.636	0.871	1.02	3.61e-01	0.64	-7.242	L5D6_OR_VS_L5D6_Ctr	noSig	NA
1665	KWMTBOMO01665	-0.874	2.148	-5.131	5.30e-03	0.0376	-2.596	L5D6_OR_VS_L5D6_Ctr	down	LOC101735521
1666	KWMTBOMO01666	0.655	1.279	2.366	7.14e-02	0.244	-5.604	L5D6_OR_VS_L5D6_Ctr	noSig	LOC692907
1667	KWMTBOMO01667	-0.688	1.54	-5.983	2.90e-03	0.0253	-1.88	L5D6_OR_VS_L5D6_Ctr	down	LOC101735658
1668	KWMTBOMO01668	-0.867	2.801	-4.283	1.05e-02	0.0604	-3.4	L5D6_OR_VS_L5D6_Ctr	noSig	LOC101735476
1669	KWMTBOMO01669	-0.096	5.497	-1.076	3.38e-01	0.631	-7.184	L5D6_OR_VS_L5D6_Ctr	noSig	LOC732901
1670	KWMTBOMO01670	-1.257	2.176	-7.695	1.04e-03	0.0133	-0.666	L5D6_OR_VS_L5D6_Ctr	down	NA
1671	KWMTBOMO01671	-0.821	1.736	-5.175	5.12e-03	0.0367	-2.557	L5D6_OR_VS_L5D6_Ctr	down	LOC101735802
1672	KWMTBOMO01672	0.028	0.014	1.046	3.50e-01	0.631	-7.215	L5D6_OR_VS_L5D6_Ctr	noSig	NA
1673	KWMTBOMO01673	-0.063	0.096	-1.19	2.95e-01	0.631	-7.062	L5D6_OR_VS_L5D6_Ctr	noSig	NA
1674	KWMTBOMO01674	-0.127	0.073	-1.518	1.97e-01	0.489	-6.679	L5D6_OR_VS_L5D6_Ctr	noSig	NA
1675	KWMTBOMO01675	0.768	2.93	3.255	2.73e-02	0.119	-4.515	L5D6_OR_VS_L5D6_Ctr	noSig	LOC733127
1676	KWMTBOMO01676	-0.104	2.869	-0.385	7.18e-01	1	-7.724	L5D6_OR_VS_L5D6_Ctr	noSig	NA
1677	KWMTBOMO01677	-0.505	2.846	-4.972	5.98e-03	0.0408	-2.739	L5D6_OR_VS_L5D6_Ctr	down	LOC101735930
1678	KWMTBOMO01678	-0.489	1.594	-2.907	3.92e-02	0.156	-4.93	L5D6_OR_VS_L5D6_Ctr	noSig	NA
1679	KWMTBOMO01679	-0.21	2.679	-1.747	1.49e-01	0.4	-6.394	L5D6_OR_VS_L5D6_Ctr	noSig	NA
1680	KWMTBOMO01680	-0.088	0.09	-0.651	5.48e-01	0.87	-7.566	L5D6_OR_VS_L5D6_Ctr	noSig	NA
1681	KWMTBOMO01681	0	0	0	1.00e+00	1	-7.814	L5D6_OR_VS_L5D6_Ctr	noSig	LOC101736056
1682	KWMTBOMO01682	0	0	0	1.00e+00	1	-7.814	L5D6_OR_VS_L5D6_Ctr	noSig	LOC101735700
1683	KWMTBOMO01683	0.414	3.944	4.96	6.03e-03	0.041	-2.75	L5D6_OR_VS_L5D6_Ctr	noSig	LOC693040
1684	KWMTBOMO01684	-0.224	2.24	-1.477	2.08e-01	0.507	-6.729	L5D6_OR_VS_L5D6_Ctr	noSig	LOC101735838
1685	KWMTBOMO01685	-2.461	3.692	-14.205	7.75e-05	0.00347	2.37	L5D6_OR_VS_L5D6_Ctr	down	LOC101735970
1686	KWMTBOMO01686	0	0	0	1.00e+00	1	-7.814	L5D6_OR_VS_L5D6_Ctr	noSig	NA
1687	KWMTBOMO01687	-0.909	1.62	-3.063	3.32e-02	0.138	-4.742	L5D6_OR_VS_L5D6_Ctr	noSig	NA
1688	KWMTBOMO01688	0.799	5.472	4.586	8.12e-03	0.0506	-3.101	L5D6_OR_VS_L5D6_Ctr	noSig	LOC101736101
1689	KWMTBOMO01689	0.006	0.137	0.047	9.65e-01	1	-7.812	L5D6_OR_VS_L5D6_Ctr	noSig	NA
1690	KWMTBOMO01690	-0.418	1.374	-1.201	2.91e-01	0.631	-7.05	L5D6_OR_VS_L5D6_Ctr	noSig	LOC692869
1691	KWMTBOMO01691	0	0	0	1.00e+00	1	-7.814	L5D6_OR_VS_L5D6_Ctr	noSig	CTL6
1692	KWMTBOMO01692	0	0	0	1.00e+00	1	-7.814	L5D6_OR_VS_L5D6_Ctr	noSig	LOC101736237
1693	KWMTBOMO01693	0	0	0	1.00e+00	1	-7.814	L5D6_OR_VS_L5D6_Ctr	noSig	LOC100862767
1694	KWMTBOMO01694	0	0	0	1.00e+00	1	-7.814	L5D6_OR_VS_L5D6_Ctr	noSig	LOC101736367
1695	KWMTBOMO01695	-0.116	0.165	-0.923	4.04e-01	0.696	-7.337	L5D6_OR_VS_L5D6_Ctr	noSig	LOC101736451
1696	KWMTBOMO01696	-0.134	2.468	-1.2	2.91e-01	0.631	-7.051	L5D6_OR_VS_L5D6_Ctr	noSig	LOC101736578
1697	KWMTBOMO01697	0	0	0	1.00e+00	1	-7.814	L5D6_OR_VS_L5D6_Ctr	noSig	LOC101736579
1698	KWMTBOMO01698	-0.363	0.964	-2.161	9.07e-02	0.291	-5.866	L5D6_OR_VS_L5D6_Ctr	noSig	LOC110386676
1699	KWMTBOMO01699	0.763	1.624	7.966	9.03e-04	0.0122	-0.496	L5D6_OR_VS_L5D6_Ctr	up	LOC101736723
1700	KWMTBOMO01700	0.806	2.121	1.657	1.66e-01	0.435	-6.507	L5D6_OR_VS_L5D6_Ctr	noSig	LOC101736813
1701	KWMTBOMO01701	-0.039	0.139	-0.839	4.45e-01	0.748	-7.414	L5D6_OR_VS_L5D6_Ctr	noSig	LOC101736853
1702	KWMTBOMO01702	0	0	0	1.00e+00	1	-7.814	L5D6_OR_VS_L5D6_Ctr	noSig	LOC110385641
1703	KWMTBOMO01703	-0.059	0.029	-1.047	3.49e-01	0.631	-7.214	L5D6_OR_VS_L5D6_Ctr	noSig	NA
1704	KWMTBOMO01704	-0.119	0.059	-1.048	3.49e-01	0.631	-7.213	L5D6_OR_VS_L5D6_Ctr	noSig	NA
1705	KWMTBOMO01705	-0.414	3.926	-3.544	2.05e-02	0.0966	-4.185	L5D6_OR_VS_L5D6_Ctr	noSig	LOC101736940
1706	KWMTBOMO01706	-1.101	1.157	-10.491	2.84e-04	0.00645	0.869	L5D6_OR_VS_L5D6_Ctr	down	NA
1707	KWMTBOMO01707	-0.323	3.606	-1.381	2.34e-01	0.552	-6.844	L5D6_OR_VS_L5D6_Ctr	noSig	LOC101737117
1708	KWMTBOMO01708	-0.515	3.014	-2.697	4.92e-02	0.185	-5.187	L5D6_OR_VS_L5D6_Ctr	noSig	LOC101737161
1709	KWMTBOMO01709	1.413	3.145	12.041	1.58e-04	0.00482	1.554	L5D6_OR_VS_L5D6_Ctr	up	LOC101737308
1710	KWMTBOMO01710	0.231	0.115	3.247	2.75e-02	0.12	-4.524	L5D6_OR_VS_L5D6_Ctr	noSig	LOC101737450
1711	KWMTBOMO01711	0	0	0	1.00e+00	1	-7.814	L5D6_OR_VS_L5D6_Ctr	noSig	LOC101737591
1712	KWMTBOMO01712	-1.115	3.732	-6.271	2.40e-03	0.0223	-1.658	L5D6_OR_VS_L5D6_Ctr	down	NA
1713	KWMTBOMO01713	-0.03	0.081	-0.626	5.63e-01	0.887	-7.584	L5D6_OR_VS_L5D6_Ctr	noSig	NA
1714	KWMTBOMO01714	-0.556	3.407	-3.985	1.36e-02	0.0721	-3.706	L5D6_OR_VS_L5D6_Ctr	noSig	LOC101737261
1715	KWMTBOMO01715	-0.058	0.038	-0.89	4.19e-01	0.716	-7.367	L5D6_OR_VS_L5D6_Ctr	noSig	NA
1716	KWMTBOMO01716	-0.046	0.023	-1.047	3.49e-01	0.631	-7.214	L5D6_OR_VS_L5D6_Ctr	noSig	NA
1717	KWMTBOMO01717	-0.092	0.046	-1.048	3.49e-01	0.631	-7.213	L5D6_OR_VS_L5D6_Ctr	noSig	NA
1718	KWMTBOMO01718	1.487	1.95	10.107	3.32e-04	0.00702	0.683	L5D6_OR_VS_L5D6_Ctr	up	LOC101737733
1719	KWMTBOMO01719	0.487	1.981	2.804	4.37e-02	0.17	-5.055	L5D6_OR_VS_L5D6_Ctr	noSig	LOC101738131
1720	KWMTBOMO01720	-0.331	2.304	-2.6	5.47e-02	0.2	-5.308	L5D6_OR_VS_L5D6_Ctr	noSig	LOC101738262
1721	KWMTBOMO01721	-1.438	1.218	-23.269	9.10e-06	0.00153	4.7	L5D6_OR_VS_L5D6_Ctr	down	LOC101738489
1722	KWMTBOMO01722	-0.076	0.113	-0.47	6.61e-01	0.992	-7.682	L5D6_OR_VS_L5D6_Ctr	noSig	LOC101738619
1723	KWMTBOMO01723	1.614	1.403	6.378	2.24e-03	0.0214	-1.577	L5D6_OR_VS_L5D6_Ctr	up	LOC101737404
1724	KWMTBOMO01724	-0.059	0.029	-1.047	3.49e-01	0.631	-7.214	L5D6_OR_VS_L5D6_Ctr	noSig	NA
1725	KWMTBOMO01725	0.028	0.014	1.046	3.50e-01	0.631	-7.215	L5D6_OR_VS_L5D6_Ctr	noSig	NA
1726	KWMTBOMO01726	-0.099	0.154	-0.748	4.93e-01	0.805	-7.491	L5D6_OR_VS_L5D6_Ctr	noSig	NA
1727	KWMTBOMO01727	-0.078	0.167	-2.359	7.20e-02	0.245	-5.613	L5D6_OR_VS_L5D6_Ctr	noSig	NA
1728	KWMTBOMO01728	0.037	0.019	1.047	3.49e-01	0.631	-7.214	L5D6_OR_VS_L5D6_Ctr	noSig	NA
1729	KWMTBOMO01729	0	0	0	1.00e+00	1	-7.814	L5D6_OR_VS_L5D6_Ctr	noSig	NA
1730	KWMTBOMO01730	0	0	0	1.00e+00	1	-7.814	L5D6_OR_VS_L5D6_Ctr	noSig	ICE
1731	KWMTBOMO01731	0	0	0	1.00e+00	1	-7.814	L5D6_OR_VS_L5D6_Ctr	noSig	NA
1732	KWMTBOMO01732	-0.023	0.026	-0.602	5.77e-01	0.904	-7.6	L5D6_OR_VS_L5D6_Ctr	noSig	NA
1733	KWMTBOMO01733	-0.046	0.023	-1.047	3.49e-01	0.631	-7.214	L5D6_OR_VS_L5D6_Ctr	noSig	NA
1734	KWMTBOMO01734	-0.128	0.093	-2.229	8.37e-02	0.274	-5.778	L5D6_OR_VS_L5D6_Ctr	noSig	LOC101741818
1735	KWMTBOMO01735	-0.05	0.025	-1.047	3.49e-01	0.631	-7.214	L5D6_OR_VS_L5D6_Ctr	noSig	LOC105841580
1736	KWMTBOMO01736	-0.27	0.191	-3.815	1.59e-02	0.0804	-3.888	L5D6_OR_VS_L5D6_Ctr	noSig	NA
1737	KWMTBOMO01737	0	0	0	1.00e+00	1	-7.814	L5D6_OR_VS_L5D6_Ctr	noSig	LOC101737547
1738	KWMTBOMO01738	-0.013	5.534	-0.037	9.72e-01	1	-7.813	L5D6_OR_VS_L5D6_Ctr	noSig	LOC101738751
1739	KWMTBOMO01739	0.214	0.107	1.048	3.49e-01	0.631	-7.213	L5D6_OR_VS_L5D6_Ctr	noSig	LOC105842836
1740	KWMTBOMO01740	0	0	0	1.00e+00	1	-7.814	L5D6_OR_VS_L5D6_Ctr	noSig	NA
1741	KWMTBOMO01741	0.579	0.289	3.088	3.23e-02	0.135	-4.712	L5D6_OR_VS_L5D6_Ctr	noSig	LOC101738894
1742	KWMTBOMO01742	-1.056	5.93	-9.962	3.53e-04	0.00722	0.612	L5D6_OR_VS_L5D6_Ctr	down	LOC101739036
1743	KWMTBOMO01743	-0.099	0.292	-1.595	1.80e-01	0.459	-6.584	L5D6_OR_VS_L5D6_Ctr	noSig	LOC101739183
1744	KWMTBOMO01744	-0.147	0.336	-0.356	7.38e-01	1	-7.737	L5D6_OR_VS_L5D6_Ctr	noSig	NA
1745	KWMTBOMO01745	-0.043	0.054	-0.547	6.11e-01	0.939	-7.636	L5D6_OR_VS_L5D6_Ctr	noSig	LOC110385712
1746	KWMTBOMO01746	-0.46	2.747	-1.924	1.20e-01	0.346	-6.17	L5D6_OR_VS_L5D6_Ctr	noSig	NA
1747	KWMTBOMO01747	0	0	0	1.00e+00	1	-7.814	L5D6_OR_VS_L5D6_Ctr	noSig	LOC101737691
1748	KWMTBOMO01748	0.315	3.21	4.459	9.01e-03	0.0541	-3.224	L5D6_OR_VS_L5D6_Ctr	noSig	LOC101739506
1749	KWMTBOMO01749	0	0	0	1.00e+00	1	-7.814	L5D6_OR_VS_L5D6_Ctr	noSig	LOC110385721
1750	KWMTBOMO01750	0	0	0	1.00e+00	1	-7.814	L5D6_OR_VS_L5D6_Ctr	noSig	NA
1751	KWMTBOMO01751	0.106	4.009	0.684	5.28e-01	0.848	-7.541	L5D6_OR_VS_L5D6_Ctr	noSig	LOC101739790
1752	KWMTBOMO01752	-0.074	4.561	-0.795	4.67e-01	0.775	-7.452	L5D6_OR_VS_L5D6_Ctr	noSig	LOC101739522
1753	KWMTBOMO01753	-0.042	1.336	-0.161	8.79e-01	1	-7.798	L5D6_OR_VS_L5D6_Ctr	noSig	LOC101739928
1754	KWMTBOMO01754	-0.215	2.333	-1.319	2.52e-01	0.583	-6.916	L5D6_OR_VS_L5D6_Ctr	noSig	LOC101740551
1755	KWMTBOMO01755	0.331	1.739	2.349	7.28e-02	0.247	-5.626	L5D6_OR_VS_L5D6_Ctr	noSig	LOC101740688
1756	KWMTBOMO01756	-0.368	0.786	-2.482	6.25e-02	0.221	-5.457	L5D6_OR_VS_L5D6_Ctr	noSig	LOC101740931
1757	KWMTBOMO01757	0.635	8.371	5.786	3.31e-03	0.0277	-2.038	L5D6_OR_VS_L5D6_Ctr	up	eIF3h
1758	KWMTBOMO01758	0.054	0.027	1.047	3.49e-01	0.631	-7.214	L5D6_OR_VS_L5D6_Ctr	noSig	LOC101741073
1759	KWMTBOMO01759	0	0	0	1.00e+00	1	-7.814	L5D6_OR_VS_L5D6_Ctr	noSig	NA
1760	KWMTBOMO01760	-0.134	0.067	-1.048	3.49e-01	0.631	-7.213	L5D6_OR_VS_L5D6_Ctr	noSig	NA
1761	KWMTBOMO01761	-0.04	0.053	-0.872	4.28e-01	0.727	-7.384	L5D6_OR_VS_L5D6_Ctr	noSig	NA
1762	KWMTBOMO01762	-0.08	0.04	-1.048	3.49e-01	0.631	-7.213	L5D6_OR_VS_L5D6_Ctr	noSig	LOC101737825
1763	KWMTBOMO01763	-0.101	0.157	-0.868	4.30e-01	0.73	-7.388	L5D6_OR_VS_L5D6_Ctr	noSig	LOC101736598
1764	KWMTBOMO01764	-0.409	0.79	-2.677	5.03e-02	0.189	-5.212	L5D6_OR_VS_L5D6_Ctr	noSig	LOC101737957
1765	KWMTBOMO01765	0	0	0	1.00e+00	1	-7.814	L5D6_OR_VS_L5D6_Ctr	noSig	LOC101738090
1766	KWMTBOMO01766	0.374	0.337	2.545	5.83e-02	0.21	-5.378	L5D6_OR_VS_L5D6_Ctr	noSig	LOC101738219
1767	KWMTBOMO01767	-0.078	0.039	-1.564	1.86e-01	0.471	-6.622	L5D6_OR_VS_L5D6_Ctr	noSig	LOC101738350
1768	KWMTBOMO01768	0.019	0.009	1.044	3.50e-01	0.631	-7.217	L5D6_OR_VS_L5D6_Ctr	noSig	NA
1769	KWMTBOMO01769	-0.093	0.046	-4.335	1.00e-02	0.0585	-3.348	L5D6_OR_VS_L5D6_Ctr	noSig	LOC110385051
1770	KWMTBOMO01770	0	0	0	1.00e+00	1	-7.814	L5D6_OR_VS_L5D6_Ctr	noSig	LOC101738490
1771	KWMTBOMO01771	0	0	0	1.00e+00	1	-7.814	L5D6_OR_VS_L5D6_Ctr	noSig	WNT-1
1772	KWMTBOMO01772	0	0	0	1.00e+00	1	-7.814	L5D6_OR_VS_L5D6_Ctr	noSig	LOC101741216
1773	KWMTBOMO01773	0	0	0	1.00e+00	1	-7.814	L5D6_OR_VS_L5D6_Ctr	noSig	LOC101741036
1774	KWMTBOMO01774	-0.032	0.054	-0.856	4.36e-01	0.738	-7.399	L5D6_OR_VS_L5D6_Ctr	noSig	LOC101740895
1775	KWMTBOMO01775	0.085	2.06	0.437	6.83e-01	1	-7.699	L5D6_OR_VS_L5D6_Ctr	noSig	LOC101738752
1776	KWMTBOMO01776	0	0	0	1.00e+00	1	-7.814	L5D6_OR_VS_L5D6_Ctr	noSig	LOC101738896
1777	KWMTBOMO01777	-0.009	0.014	-0.462	6.66e-01	0.997	-7.686	L5D6_OR_VS_L5D6_Ctr	noSig	LOC101737976
1778	KWMTBOMO01778	0.002	0.16	0.022	9.83e-01	1	-7.813	L5D6_OR_VS_L5D6_Ctr	noSig	LOC100313953
1779	KWMTBOMO01779	-0.155	0.077	-1.048	3.49e-01	0.631	-7.213	L5D6_OR_VS_L5D6_Ctr	noSig	LOC101741357
1780	KWMTBOMO01780	0.126	0.063	1.048	3.49e-01	0.631	-7.213	L5D6_OR_VS_L5D6_Ctr	noSig	LOC101744875
1781	KWMTBOMO01781	0	0	0	1.00e+00	1	-7.814	L5D6_OR_VS_L5D6_Ctr	noSig	NA
1782	KWMTBOMO01782	-0.29	0.223	-1.246	2.75e-01	0.622	-7	L5D6_OR_VS_L5D6_Ctr	noSig	NA
1783	KWMTBOMO01783	-0.202	0.949	-0.395	7.11e-01	1	-7.72	L5D6_OR_VS_L5D6_Ctr	noSig	NA
1784	KWMTBOMO01784	-0.938	2.97	-3.564	2.01e-02	0.0953	-4.162	L5D6_OR_VS_L5D6_Ctr	noSig	LOC101739184
1785	KWMTBOMO01785	-0.525	3.581	-5.041	5.67e-03	0.0394	-2.676	L5D6_OR_VS_L5D6_Ctr	down	LOC101739321
1786	KWMTBOMO01786	0.014	0.007	1.042	3.51e-01	0.631	-7.219	L5D6_OR_VS_L5D6_Ctr	noSig	LOC101741442
1787	KWMTBOMO01787	-0.102	0.42	-0.328	7.58e-01	1	-7.748	L5D6_OR_VS_L5D6_Ctr	noSig	LOC101741583
1788	KWMTBOMO01788	-2.086	3.328	-24.438	7.35e-06	0.00142	4.917	L5D6_OR_VS_L5D6_Ctr	down	LOC101741727
1789	KWMTBOMO01789	0.916	4.781	4.137	1.19e-02	0.066	-3.548	L5D6_OR_VS_L5D6_Ctr	noSig	LOC692905
1790	KWMTBOMO01790	-0.45	3.728	-7.19	1.38e-03	0.0155	-0.998	L5D6_OR_VS_L5D6_Ctr	noSig	LOC101741876
1791	KWMTBOMO01791	-0.783	2.968	-2.923	3.85e-02	0.154	-4.91	L5D6_OR_VS_L5D6_Ctr	noSig	LOC110385726
1792	KWMTBOMO01792	0	0	0	1.00e+00	1	-7.814	L5D6_OR_VS_L5D6_Ctr	noSig	LOC105842950
1793	KWMTBOMO01793	-0.13	0.065	-2.092	9.84e-02	0.304	-5.955	L5D6_OR_VS_L5D6_Ctr	noSig	NA
1794	KWMTBOMO01794	-1.147	6.357	-4.866	6.49e-03	0.0431	-2.837	L5D6_OR_VS_L5D6_Ctr	down	LOC101742221
1795	KWMTBOMO01795	-0.252	0.755	-1.954	1.16e-01	0.337	-6.131	L5D6_OR_VS_L5D6_Ctr	noSig	LOC101742355
1796	KWMTBOMO01796	-0.6	2.182	-2.621	5.35e-02	0.197	-5.282	L5D6_OR_VS_L5D6_Ctr	noSig	LOC692987
1797	KWMTBOMO01797	-0.709	1.497	-1.513	1.99e-01	0.491	-6.685	L5D6_OR_VS_L5D6_Ctr	noSig	LOC101742507
1798	KWMTBOMO01798	-0.303	0.262	-2.766	4.56e-02	0.175	-5.101	L5D6_OR_VS_L5D6_Ctr	noSig	LOC101739883
1799	KWMTBOMO01799	-0.963	5.893	-7.856	9.57e-04	0.0126	-0.564	L5D6_OR_VS_L5D6_Ctr	down	LOC733131
1800	KWMTBOMO01800	-0.017	1.016	-0.053	9.60e-01	1	-7.812	L5D6_OR_VS_L5D6_Ctr	noSig	LOC733043
1801	KWMTBOMO01801	-0.187	0.173	-1.712	1.56e-01	0.414	-6.438	L5D6_OR_VS_L5D6_Ctr	noSig	LOC101742844
1802	KWMTBOMO01802	2.55	3.748	12.341	1.42e-04	0.00457	1.676	L5D6_OR_VS_L5D6_Ctr	up	LOC693077
1803	KWMTBOMO01803	-0.847	0.988	-3.016	3.49e-02	0.143	-4.798	L5D6_OR_VS_L5D6_Ctr	noSig	LOC101742986
1804	KWMTBOMO01804	-1.813	2.499	-18.687	2.36e-05	0.00232	3.693	L5D6_OR_VS_L5D6_Ctr	down	LOC101743271
1805	KWMTBOMO01805	-0.755	3.876	-4.9	6.32e-03	0.0423	-2.805	L5D6_OR_VS_L5D6_Ctr	down	LOC101743127
1806	KWMTBOMO01806	-0.087	3.245	-9.156	5.05e-04	0.00883	0.192	L5D6_OR_VS_L5D6_Ctr	noSig	LOC101743411
1807	KWMTBOMO01807	0	0	0	1.00e+00	1	-7.814	L5D6_OR_VS_L5D6_Ctr	noSig	CPR57
1808	KWMTBOMO01808	0.019	0.529	0.058	9.57e-01	1	-7.812	L5D6_OR_VS_L5D6_Ctr	noSig	LOC101743645
1809	KWMTBOMO01809	-0.019	0.173	-0.099	9.26e-01	1	-7.808	L5D6_OR_VS_L5D6_Ctr	noSig	NA
1810	KWMTBOMO01810	0	0	0	1.00e+00	1	-7.814	L5D6_OR_VS_L5D6_Ctr	noSig	NA
1811	KWMTBOMO01811	-0.687	1.483	-5.686	3.55e-03	0.0288	-2.12	L5D6_OR_VS_L5D6_Ctr	down	LOC101740151
1812	KWMTBOMO01812	0	0	0	1.00e+00	1	-7.814	L5D6_OR_VS_L5D6_Ctr	noSig	LOC101743892
1813	KWMTBOMO01813	-0.028	0.014	-1.046	3.50e-01	0.631	-7.215	L5D6_OR_VS_L5D6_Ctr	noSig	LOC101744036
1814	KWMTBOMO01814	-0.067	0.034	-1.047	3.49e-01	0.631	-7.214	L5D6_OR_VS_L5D6_Ctr	noSig	LOC692784
1815	KWMTBOMO01815	-0.699	1.814	-9.61	4.11e-04	0.00797	0.433	L5D6_OR_VS_L5D6_Ctr	down	LOC101735630
1816	KWMTBOMO01816	-0.69	2.74	-5.24	4.88e-03	0.0355	-2.5	L5D6_OR_VS_L5D6_Ctr	down	LOC105842295
1817	KWMTBOMO01817	0.235	3.097	1.974	1.13e-01	0.332	-6.105	L5D6_OR_VS_L5D6_Ctr	noSig	LOC101736027
1818	KWMTBOMO01818	-0.694	2.026	-3.237	2.78e-02	0.121	-4.536	L5D6_OR_VS_L5D6_Ctr	noSig	LOC101740295
1819	KWMTBOMO01819	-0.853	1.034	-4.907	6.29e-03	0.0421	-2.799	L5D6_OR_VS_L5D6_Ctr	down	LOC101740689
1820	KWMTBOMO01820	-0.321	0.709	-3.772	1.65e-02	0.0829	-3.933	L5D6_OR_VS_L5D6_Ctr	noSig	LOC101740165
1821	KWMTBOMO01821	-1.127	4.822	-10.685	2.63e-04	0.00616	0.96	L5D6_OR_VS_L5D6_Ctr	down	LOC101744329
1822	KWMTBOMO01822	0.04	0.218	0.134	8.99e-01	1	-7.803	L5D6_OR_VS_L5D6_Ctr	noSig	LOC101740975
1823	KWMTBOMO01823	-0.028	0.161	-0.357	7.37e-01	1	-7.737	L5D6_OR_VS_L5D6_Ctr	noSig	LOC105841392
1824	KWMTBOMO01824	-0.759	2.967	-11.406	1.99e-04	0.00533	1.285	L5D6_OR_VS_L5D6_Ctr	down	LOC101744473
1825	KWMTBOMO01825	0	0	0	1.00e+00	1	-7.814	L5D6_OR_VS_L5D6_Ctr	noSig	irp2
1826	KWMTBOMO01826	-1.122	1.509	-5.692	3.53e-03	0.0287	-2.115	L5D6_OR_VS_L5D6_Ctr	down	LOC732942
1827	KWMTBOMO01827	-2.115	2.538	-36.861	1.22e-06	0.000901	6.568	L5D6_OR_VS_L5D6_Ctr	down	LOC101744619
1828	KWMTBOMO01828	0	0	0	1.00e+00	1	-7.814	L5D6_OR_VS_L5D6_Ctr	noSig	LOC101744759
1829	KWMTBOMO01829	0.264	0.132	4.033	1.30e-02	0.0703	-3.656	L5D6_OR_VS_L5D6_Ctr	noSig	CTL5
1830	KWMTBOMO01830	-0.269	2.642	-2.752	4.63e-02	0.177	-5.119	L5D6_OR_VS_L5D6_Ctr	noSig	LOC101744997
1831	KWMTBOMO01831	0.297	4.263	2.742	4.68e-02	0.179	-5.132	L5D6_OR_VS_L5D6_Ctr	noSig	LOC101745143
1832	KWMTBOMO01832	-0.984	5.002	-6.926	1.61e-03	0.0172	-1.179	L5D6_OR_VS_L5D6_Ctr	down	LOC101745294
1833	KWMTBOMO01833	0.324	0.406	2.525	5.96e-02	0.213	-5.403	L5D6_OR_VS_L5D6_Ctr	noSig	NA
1834	KWMTBOMO01834	0	0	0	1.00e+00	1	-7.814	L5D6_OR_VS_L5D6_Ctr	noSig	LOC101745576
1835	KWMTBOMO01835	0	0	0	1.00e+00	1	-7.814	L5D6_OR_VS_L5D6_Ctr	noSig	LOC101745434
1836	KWMTBOMO01836	0.113	0.357	1.85	1.32e-01	0.367	-6.264	L5D6_OR_VS_L5D6_Ctr	noSig	LOC101741258
1837	KWMTBOMO01837	0.099	0.05	1.671	1.64e-01	0.43	-6.489	L5D6_OR_VS_L5D6_Ctr	noSig	NA
1838	KWMTBOMO01838	0	0	0	1.00e+00	1	-7.814	L5D6_OR_VS_L5D6_Ctr	noSig	LOC101741538
1839	KWMTBOMO01839	0	0	0	1.00e+00	1	-7.814	L5D6_OR_VS_L5D6_Ctr	noSig	LOC101741820
1840	KWMTBOMO01840	-0.265	1.385	-0.836	4.46e-01	0.75	-7.416	L5D6_OR_VS_L5D6_Ctr	noSig	LOC101741971
1841	KWMTBOMO01841	-0.007	2.122	-0.02	9.85e-01	1	-7.813	L5D6_OR_VS_L5D6_Ctr	noSig	LOC101745726
1842	KWMTBOMO01842	-1.79	2.829	-18.033	2.76e-05	0.00237	3.524	L5D6_OR_VS_L5D6_Ctr	down	Acci
1843	KWMTBOMO01843	-0.254	0.264	-2.235	8.31e-02	0.272	-5.771	L5D6_OR_VS_L5D6_Ctr	noSig	NA
1844	KWMTBOMO01844	-0.205	7.376	-3.871	1.51e-02	0.0776	-3.827	L5D6_OR_VS_L5D6_Ctr	noSig	LOC101745874
1845	KWMTBOMO01845	-0.247	0.232	-1.852	1.31e-01	0.367	-6.261	L5D6_OR_VS_L5D6_Ctr	noSig	LOC101746112
1846	KWMTBOMO01846	0	0	0	1.00e+00	1	-7.814	L5D6_OR_VS_L5D6_Ctr	noSig	NA
1847	KWMTBOMO01847	0	0	0	1.00e+00	1	-7.814	L5D6_OR_VS_L5D6_Ctr	noSig	NA
1848	KWMTBOMO01848	-0.056	0.028	-2.092	9.84e-02	0.304	-5.954	L5D6_OR_VS_L5D6_Ctr	noSig	LOC101742112
1849	KWMTBOMO01849	0	0	0	1.00e+00	1	-7.814	L5D6_OR_VS_L5D6_Ctr	noSig	LOC101742267
1850	KWMTBOMO01850	0	0	0	1.00e+00	1	-7.814	L5D6_OR_VS_L5D6_Ctr	noSig	LOC101742696
1851	KWMTBOMO01851	-0.554	3.678	-4.581	8.15e-03	0.0507	-3.105	L5D6_OR_VS_L5D6_Ctr	noSig	LOC101742845
1852	KWMTBOMO01852	-0.394	2.867	-3.758	1.67e-02	0.0836	-3.949	L5D6_OR_VS_L5D6_Ctr	noSig	LOC101746394
1853	KWMTBOMO01853	-0.488	0.677	-3.08	3.26e-02	0.136	-4.722	L5D6_OR_VS_L5D6_Ctr	noSig	NA
1854	KWMTBOMO01854	-0.401	0.601	-2.744	4.67e-02	0.178	-5.129	L5D6_OR_VS_L5D6_Ctr	noSig	NA
1855	KWMTBOMO01855	-0.831	4.959	-16.14	4.46e-05	0.00273	2.992	L5D6_OR_VS_L5D6_Ctr	down	USP
1856	KWMTBOMO01856	-0.14	1.761	-2.018	1.07e-01	0.319	-6.049	L5D6_OR_VS_L5D6_Ctr	noSig	LOC101746531
1857	KWMTBOMO01857	-0.562	0.663	-4.824	6.71e-03	0.0442	-2.876	L5D6_OR_VS_L5D6_Ctr	down	Fatp
1858	KWMTBOMO01858	-0.273	0.329	-4.104	1.22e-02	0.0673	-3.582	L5D6_OR_VS_L5D6_Ctr	noSig	LOC105841502
1859	KWMTBOMO01859	-1.005	2.568	-6.519	2.05e-03	0.0201	-1.472	L5D6_OR_VS_L5D6_Ctr	down	LOC101746772
1860	KWMTBOMO01860	-0.056	0.153	-0.594	5.82e-01	0.909	-7.606	L5D6_OR_VS_L5D6_Ctr	noSig	LOC101746913
1861	KWMTBOMO01861	-1.513	3.047	-12.695	1.26e-04	0.00439	1.816	L5D6_OR_VS_L5D6_Ctr	down	LOC101747130
1862	KWMTBOMO01862	-0.368	3.107	-2.749	4.65e-02	0.178	-5.123	L5D6_OR_VS_L5D6_Ctr	noSig	LOC101735337
1863	KWMTBOMO01863	-0.448	0.347	-2.229	8.38e-02	0.274	-5.779	L5D6_OR_VS_L5D6_Ctr	noSig	NA
1864	KWMTBOMO01864	0.028	0.014	2.084	9.94e-02	0.304	-5.965	L5D6_OR_VS_L5D6_Ctr	noSig	LOC101736924
1865	KWMTBOMO01865	0.023	0.012	1.046	3.50e-01	0.631	-7.216	L5D6_OR_VS_L5D6_Ctr	noSig	LOC105842948
1866	KWMTBOMO01866	0.171	1.469	1.041	3.52e-01	0.631	-7.22	L5D6_OR_VS_L5D6_Ctr	noSig	LOC101742987
1867	KWMTBOMO01867	-0.174	0.11	-7.632	1.08e-03	0.0136	-0.706	L5D6_OR_VS_L5D6_Ctr	noSig	LOC101735520
1868	KWMTBOMO01868	0.16	0.08	2.417	6.73e-02	0.233	-5.539	L5D6_OR_VS_L5D6_Ctr	noSig	NA
1869	KWMTBOMO01869	-0.834	0.613	-7.466	1.18e-03	0.0143	-0.814	L5D6_OR_VS_L5D6_Ctr	down	LOC105842092
1870	KWMTBOMO01870	0	0	0	1.00e+00	1	-7.814	L5D6_OR_VS_L5D6_Ctr	noSig	LOC101735801
1871	KWMTBOMO01871	-0.121	0.163	-0.992	3.73e-01	0.653	-7.27	L5D6_OR_VS_L5D6_Ctr	noSig	LOC101735929
1872	KWMTBOMO01872	0.177	5.73	3.641	1.87e-02	0.0905	-4.077	L5D6_OR_VS_L5D6_Ctr	noSig	LOC101736055
1873	KWMTBOMO01873	-0.151	0.076	-1.048	3.49e-01	0.631	-7.213	L5D6_OR_VS_L5D6_Ctr	noSig	NA
1874	KWMTBOMO01874	0.033	0.016	1.047	3.49e-01	0.631	-7.214	L5D6_OR_VS_L5D6_Ctr	noSig	LOC101736284
1875	KWMTBOMO01875	0.514	3.661	2.118	9.54e-02	0.301	-5.92	L5D6_OR_VS_L5D6_Ctr	noSig	LOC101736413
1876	KWMTBOMO01876	-0.633	0.483	-7.048	1.50e-03	0.0164	-1.095	L5D6_OR_VS_L5D6_Ctr	down	LOC101736539
1877	KWMTBOMO01877	0.118	2.198	1.369	2.37e-01	0.558	-6.858	L5D6_OR_VS_L5D6_Ctr	noSig	ccdc25
1878	KWMTBOMO01878	-1.246	2.44	-6.26	2.42e-03	0.0224	-1.666	L5D6_OR_VS_L5D6_Ctr	down	NA
1879	KWMTBOMO01879	0.292	4.61	2.106	9.67e-02	0.304	-5.936	L5D6_OR_VS_L5D6_Ctr	noSig	LOC101736852
1880	KWMTBOMO01880	0.65	2.313	4.464	8.98e-03	0.054	-3.219	L5D6_OR_VS_L5D6_Ctr	noSig	LOC101743553
1881	KWMTBOMO01881	-1.482	4.994	-25.491	6.11e-06	0.00136	5.101	L5D6_OR_VS_L5D6_Ctr	down	DnaJ-9
1882	KWMTBOMO01882	0	0	0	1.00e+00	1	-7.814	L5D6_OR_VS_L5D6_Ctr	noSig	LOC101737071
1883	KWMTBOMO01883	-1.681	2.731	-9.472	4.37e-04	0.00825	0.361	L5D6_OR_VS_L5D6_Ctr	down	LOC101743694
1884	KWMTBOMO01884	-0.111	0.083	-1.548	1.90e-01	0.478	-6.643	L5D6_OR_VS_L5D6_Ctr	noSig	CTL4
1885	KWMTBOMO01885	0.267	5.998	4.461	9.00e-03	0.0541	-3.222	L5D6_OR_VS_L5D6_Ctr	noSig	DnaJ-1
1886	KWMTBOMO01886	0.072	0.559	0.28	7.93e-01	1	-7.766	L5D6_OR_VS_L5D6_Ctr	noSig	LOC101737309
1887	KWMTBOMO01887	0	0	0	1.00e+00	1	-7.814	L5D6_OR_VS_L5D6_Ctr	noSig	LOC101737546
1888	KWMTBOMO01888	-0.666	2.269	-7.943	9.14e-04	0.0123	-0.51	L5D6_OR_VS_L5D6_Ctr	down	LOC101743842
1889	KWMTBOMO01889	-0.137	0.161	-0.913	4.09e-01	0.702	-7.346	L5D6_OR_VS_L5D6_Ctr	noSig	LOC101737784
1890	KWMTBOMO01890	0.165	0.424	0.789	4.70e-01	0.778	-7.457	L5D6_OR_VS_L5D6_Ctr	noSig	LOC101738004
1891	KWMTBOMO01891	0	0	0	1.00e+00	1	-7.814	L5D6_OR_VS_L5D6_Ctr	noSig	LOC101738132
1892	KWMTBOMO01892	-0.796	2.622	-3.925	1.43e-02	0.0751	-3.77	L5D6_OR_VS_L5D6_Ctr	noSig	LOC101738263
1893	KWMTBOMO01893	-1.742	3.703	-14.745	6.60e-05	0.00326	2.553	L5D6_OR_VS_L5D6_Ctr	down	LOC101743990
1894	KWMTBOMO01894	-1.899	4.285	-9.61	4.11e-04	0.00797	0.433	L5D6_OR_VS_L5D6_Ctr	down	LOC101738402
1895	KWMTBOMO01895	0.931	3.623	3.52	2.10e-02	0.0984	-4.212	L5D6_OR_VS_L5D6_Ctr	noSig	LOC101738669
1896	KWMTBOMO01896	-1.073	2.272	-5.768	3.35e-03	0.0279	-2.054	L5D6_OR_VS_L5D6_Ctr	down	LOC101738537
1897	KWMTBOMO01897	-0.198	1.391	-1.418	2.23e-01	0.534	-6.799	L5D6_OR_VS_L5D6_Ctr	noSig	LOC101744134
1898	KWMTBOMO01898	-0.179	0.089	-2.023	1.07e-01	0.318	-6.043	L5D6_OR_VS_L5D6_Ctr	noSig	LOC105842368
1899	KWMTBOMO01899	1.215	1.348	8.933	5.60e-04	0.00935	0.07	L5D6_OR_VS_L5D6_Ctr	up	LOC101744567
1900	KWMTBOMO01900	-0.093	0.166	-2.068	1.01e-01	0.306	-5.985	L5D6_OR_VS_L5D6_Ctr	noSig	NA
1901	KWMTBOMO01901	-0.31	0.529	-1.178	2.99e-01	0.631	-7.075	L5D6_OR_VS_L5D6_Ctr	noSig	NA
1902	KWMTBOMO01902	0.066	0.437	0.175	8.69e-01	1	-7.795	L5D6_OR_VS_L5D6_Ctr	noSig	LOC101736034
1903	KWMTBOMO01903	0.05	0.025	1.047	3.49e-01	0.631	-7.214	L5D6_OR_VS_L5D6_Ctr	noSig	NA
1904	KWMTBOMO01904	0.01	0.046	0.208	8.45e-01	1	-7.787	L5D6_OR_VS_L5D6_Ctr	noSig	LOC101744709
1905	KWMTBOMO01905	0	0	0	1.00e+00	1	-7.814	L5D6_OR_VS_L5D6_Ctr	noSig	LOC101744857
1906	KWMTBOMO01906	-0.101	0.084	-1.523	1.96e-01	0.487	-6.673	L5D6_OR_VS_L5D6_Ctr	noSig	NA
1907	KWMTBOMO01907	0.028	0.014	1.046	3.50e-01	0.631	-7.215	L5D6_OR_VS_L5D6_Ctr	noSig	Mir3324
1908	KWMTBOMO01908	0.687	1.159	4.535	8.46e-03	0.0518	-3.15	L5D6_OR_VS_L5D6_Ctr	noSig	LOC101739037
1909	KWMTBOMO01909	0.012	0.067	0.189	8.58e-01	1	-7.792	L5D6_OR_VS_L5D6_Ctr	noSig	LOC101744998
1910	KWMTBOMO01910	-0.063	0.274	-0.289	7.85e-01	1	-7.763	L5D6_OR_VS_L5D6_Ctr	noSig	LOC101739275
1911	KWMTBOMO01911	-0.203	0.121	-10.099	3.34e-04	0.00703	0.679	L5D6_OR_VS_L5D6_Ctr	noSig	NA
1912	KWMTBOMO01912	0.115	0.057	1.048	3.49e-01	0.631	-7.213	L5D6_OR_VS_L5D6_Ctr	noSig	NA
1913	KWMTBOMO01913	-0.592	4.032	-4.23	1.10e-02	0.0624	-3.453	L5D6_OR_VS_L5D6_Ctr	noSig	LOC101739416
1914	KWMTBOMO01914	-1.004	4.423	-11.695	1.79e-04	0.00512	1.409	L5D6_OR_VS_L5D6_Ctr	down	LOC101739548
1915	KWMTBOMO01915	1.269	1.047	2.779	4.49e-02	0.173	-5.085	L5D6_OR_VS_L5D6_Ctr	noSig	LOC101739791
1916	KWMTBOMO01916	0.471	6.644	7.561	1.12e-03	0.0138	-0.752	L5D6_OR_VS_L5D6_Ctr	noSig	LOC101745144
1917	KWMTBOMO01917	-0.424	1.421	-3.24	2.77e-02	0.12	-4.533	L5D6_OR_VS_L5D6_Ctr	noSig	LOC101740104
1918	KWMTBOMO01918	1.954	7.69	9.993	3.49e-04	0.00717	0.627	L5D6_OR_VS_L5D6_Ctr	up	LOC733070
1919	KWMTBOMO01919	-0.248	1.96	-2.28	7.89e-02	0.262	-5.713	L5D6_OR_VS_L5D6_Ctr	noSig	LOC101740238
1920	KWMTBOMO01920	-0.671	0.806	-5.821	3.23e-03	0.0272	-2.011	L5D6_OR_VS_L5D6_Ctr	down	LOC101740509
1921	KWMTBOMO01921	-0.487	2.424	-8.815	5.92e-04	0.00957	0.004	L5D6_OR_VS_L5D6_Ctr	noSig	LOC101740375
1922	KWMTBOMO01922	0.023	0.012	1.046	3.50e-01	0.631	-7.216	L5D6_OR_VS_L5D6_Ctr	noSig	LOC105842081
1923	KWMTBOMO01923	-0.802	2.846	-9.438	4.44e-04	0.00828	0.343	L5D6_OR_VS_L5D6_Ctr	down	LOC101740647
1924	KWMTBOMO01924	-1.253	2.827	-6.584	1.97e-03	0.0196	-1.424	L5D6_OR_VS_L5D6_Ctr	down	LOC732885
1925	KWMTBOMO01925	-0.1	0.87	-0.452	6.73e-01	1	-7.691	L5D6_OR_VS_L5D6_Ctr	noSig	LOC101740790
1926	KWMTBOMO01926	1.77	3.06	3.75	1.69e-02	0.0842	-3.958	L5D6_OR_VS_L5D6_Ctr	noSig	LOC101740932
1927	KWMTBOMO01927	-1.493	6.162	-19.983	1.77e-05	0.00208	4.007	L5D6_OR_VS_L5D6_Ctr	down	LOC693023
1928	KWMTBOMO01928	-0.465	4.212	-6.056	2.76e-03	0.0245	-1.824	L5D6_OR_VS_L5D6_Ctr	noSig	LOC101741308
1929	KWMTBOMO01929	0.362	2.313	3.096	3.21e-02	0.135	-4.702	L5D6_OR_VS_L5D6_Ctr	noSig	LOC101741636
1930	KWMTBOMO01930	-1.35	3.229	-19.732	1.87e-05	0.00212	3.948	L5D6_OR_VS_L5D6_Ctr	down	LOC101741495
1931	KWMTBOMO01931	-1.261	3.509	-9.611	4.11e-04	0.00797	0.433	L5D6_OR_VS_L5D6_Ctr	down	NA
1932	KWMTBOMO01932	0.78	4.849	4.342	9.95e-03	0.0582	-3.34	L5D6_OR_VS_L5D6_Ctr	noSig	LOC101741970
1933	KWMTBOMO01933	1.638	5.34	9.103	5.17e-04	0.00898	0.164	L5D6_OR_VS_L5D6_Ctr	up	LOC101741774
1934	KWMTBOMO01934	0.226	0.113	2.087	9.90e-02	0.304	-5.96	L5D6_OR_VS_L5D6_Ctr	noSig	NA
1935	KWMTBOMO01935	0.163	0.082	2.093	9.83e-02	0.304	-5.953	L5D6_OR_VS_L5D6_Ctr	noSig	NA
1936	KWMTBOMO01936	-0.84	4.037	-8.935	5.59e-04	0.00935	0.071	L5D6_OR_VS_L5D6_Ctr	down	LOC101742404
1937	KWMTBOMO01937	-0.839	1.39	-5.88	3.11e-03	0.0266	-1.963	L5D6_OR_VS_L5D6_Ctr	down	LOC101742645
1938	KWMTBOMO01938	-0.804	3.558	-6.622	1.93e-03	0.0194	-1.396	L5D6_OR_VS_L5D6_Ctr	down	LOC692918
1939	KWMTBOMO01939	0.218	4.27	1.428	2.20e-01	0.529	-6.787	L5D6_OR_VS_L5D6_Ctr	noSig	LOC101742797
1940	KWMTBOMO01940	-0.734	2.124	-4.169	1.15e-02	0.0647	-3.515	L5D6_OR_VS_L5D6_Ctr	noSig	pofut1
1941	KWMTBOMO01941	1.167	11.893	19.474	1.98e-05	0.00212	3.886	L5D6_OR_VS_L5D6_Ctr	up	RpL35
1942	KWMTBOMO01942	0	0	0	1.00e+00	1	-7.814	L5D6_OR_VS_L5D6_Ctr	noSig	LOC105842570
1943	KWMTBOMO01943	-0.198	0.099	-1.048	3.49e-01	0.631	-7.213	L5D6_OR_VS_L5D6_Ctr	noSig	LOC105842077
1944	KWMTBOMO01944	0.406	2.331	2.821	4.29e-02	0.168	-5.034	L5D6_OR_VS_L5D6_Ctr	noSig	LOC101743128
1945	KWMTBOMO01945	-0.468	0.698	-2.058	1.03e-01	0.309	-5.998	L5D6_OR_VS_L5D6_Ctr	noSig	LOC101743272
1946	KWMTBOMO01946	-0.178	1.034	-1.668	1.64e-01	0.431	-6.493	L5D6_OR_VS_L5D6_Ctr	noSig	LOC101743412
1947	KWMTBOMO01947	-0.364	2.503	-2.134	9.36e-02	0.297	-5.9	L5D6_OR_VS_L5D6_Ctr	noSig	LOC101745577
1948	KWMTBOMO01948	-1.121	2.597	-13.261	1.04e-04	0.00394	2.032	L5D6_OR_VS_L5D6_Ctr	down	LOC101743552
1949	KWMTBOMO01949	-0.037	0.019	-1.047	3.49e-01	0.631	-7.214	L5D6_OR_VS_L5D6_Ctr	noSig	LOC105842018
1950	KWMTBOMO01950	-0.829	0.756	-6.245	2.44e-03	0.0225	-1.678	L5D6_OR_VS_L5D6_Ctr	down	LOC733065
1951	KWMTBOMO01951	-0.634	0.509	-2.191	8.75e-02	0.283	-5.827	L5D6_OR_VS_L5D6_Ctr	noSig	LOC101743693
1952	KWMTBOMO01952	-0.973	2.392	-3.588	1.96e-02	0.0936	-4.136	L5D6_OR_VS_L5D6_Ctr	noSig	LOC101743942
1953	KWMTBOMO01953	-0.233	3.84	-4.025	1.31e-02	0.0705	-3.664	L5D6_OR_VS_L5D6_Ctr	noSig	LOC101744091
1954	KWMTBOMO01954	0	0	0	1.00e+00	1	-7.814	L5D6_OR_VS_L5D6_Ctr	noSig	LOC101744234
1955	KWMTBOMO01955	0.247	0.856	1.541	1.92e-01	0.48	-6.651	L5D6_OR_VS_L5D6_Ctr	noSig	LOC101744474
1956	KWMTBOMO01956	-0.544	2.453	-7.487	1.17e-03	0.0142	-0.8	L5D6_OR_VS_L5D6_Ctr	down	LOC101737999
1957	KWMTBOMO01957	0.061	0.03	2.076	1.00e-01	0.305	-5.975	L5D6_OR_VS_L5D6_Ctr	noSig	NA
1958	KWMTBOMO01958	0.046	0.917	0.265	8.03e-01	1	-7.771	L5D6_OR_VS_L5D6_Ctr	noSig	LOC101738345
1959	KWMTBOMO01959	-0.015	0.064	-0.209	8.43e-01	1	-7.787	L5D6_OR_VS_L5D6_Ctr	noSig	NA
1960	KWMTBOMO01960	-0.621	0.545	-3.615	1.91e-02	0.0921	-4.106	L5D6_OR_VS_L5D6_Ctr	noSig	LOC101740476
1961	KWMTBOMO01961	-0.86	2.57	-3.766	1.66e-02	0.0832	-3.94	L5D6_OR_VS_L5D6_Ctr	noSig	LOC101740615
1962	KWMTBOMO01962	-0.302	1.184	-1.3	2.58e-01	0.593	-6.937	L5D6_OR_VS_L5D6_Ctr	noSig	LOC101740986
1963	KWMTBOMO01963	0.033	0.016	1.047	3.49e-01	0.631	-7.214	L5D6_OR_VS_L5D6_Ctr	noSig	NA
1964	KWMTBOMO01964	0.702	0.351	4.209	1.12e-02	0.0632	-3.475	L5D6_OR_VS_L5D6_Ctr	noSig	LOC101741788
1965	KWMTBOMO01965	-0.927	3.106	-8.672	6.34e-04	0.00993	-0.077	L5D6_OR_VS_L5D6_Ctr	down	LOC101735329
1966	KWMTBOMO01966	-0.254	0.948	-2.221	8.45e-02	0.276	-5.789	L5D6_OR_VS_L5D6_Ctr	noSig	LOC101735555
1967	KWMTBOMO01967	0.037	0.064	0.628	5.61e-01	0.886	-7.582	L5D6_OR_VS_L5D6_Ctr	noSig	LOC101736891
1968	KWMTBOMO01968	-0.015	0.11	-0.251	8.13e-01	1	-7.775	L5D6_OR_VS_L5D6_Ctr	noSig	LOC101735695
1969	KWMTBOMO01969	-0.084	0.061	-1.325	2.50e-01	0.58	-6.909	L5D6_OR_VS_L5D6_Ctr	noSig	LOC101735833
1970	KWMTBOMO01970	-0.467	0.294	-2.115	9.58e-02	0.302	-5.925	L5D6_OR_VS_L5D6_Ctr	noSig	LOC101736482
1971	KWMTBOMO01971	-0.408	5.988	-3.961	1.39e-02	0.0732	-3.731	L5D6_OR_VS_L5D6_Ctr	noSig	LOC101736364
1972	KWMTBOMO01972	0.646	4.129	2.307	7.64e-02	0.256	-5.678	L5D6_OR_VS_L5D6_Ctr	noSig	LOC101739103
1973	KWMTBOMO01973	0.61	0.718	2.41	6.79e-02	0.235	-5.548	L5D6_OR_VS_L5D6_Ctr	noSig	LOC101736620
1974	KWMTBOMO01974	0	0	0	1.00e+00	1	-7.814	L5D6_OR_VS_L5D6_Ctr	noSig	NA
1975	KWMTBOMO01975	0.567	0.852	2	1.10e-01	0.324	-6.073	L5D6_OR_VS_L5D6_Ctr	noSig	Let-2
1976	KWMTBOMO01976	0.158	1.688	0.667	5.38e-01	0.86	-7.554	L5D6_OR_VS_L5D6_Ctr	noSig	LOC101736233
1977	KWMTBOMO01977	0.117	2.624	0.454	6.72e-01	1	-7.691	L5D6_OR_VS_L5D6_Ctr	noSig	LOC101746270
1978	KWMTBOMO01978	-0.444	2.791	-4.278	1.05e-02	0.0605	-3.404	L5D6_OR_VS_L5D6_Ctr	noSig	LOC101746643
1979	KWMTBOMO01979	-0.757	3.017	-6.611	1.94e-03	0.0195	-1.404	L5D6_OR_VS_L5D6_Ctr	down	LOC101746127
1980	KWMTBOMO01980	-0.05	0.025	-1.047	3.49e-01	0.631	-7.214	L5D6_OR_VS_L5D6_Ctr	noSig	LOC101741843
1981	KWMTBOMO01981	-0.185	0.157	-0.766	4.83e-01	0.793	-7.476	L5D6_OR_VS_L5D6_Ctr	noSig	LOC101739340
1982	KWMTBOMO01982	0.196	2.664	2.503	6.10e-02	0.217	-5.43	L5D6_OR_VS_L5D6_Ctr	noSig	LOC101741232
1983	KWMTBOMO01983	-0.205	0.703	-1.121	3.20e-01	0.631	-7.136	L5D6_OR_VS_L5D6_Ctr	noSig	LOC101744558
1984	KWMTBOMO01984	-0.726	3.306	-3.483	2.17e-02	0.101	-4.254	L5D6_OR_VS_L5D6_Ctr	noSig	LOC101744846
1985	KWMTBOMO01985	0	0	0	1.00e+00	1	-7.814	L5D6_OR_VS_L5D6_Ctr	noSig	NA
1986	KWMTBOMO01986	-0.26	0.288	-1.818	1.37e-01	0.377	-6.305	L5D6_OR_VS_L5D6_Ctr	noSig	NGR-A31
1987	KWMTBOMO01987	0	0	0	1.00e+00	1	-7.814	L5D6_OR_VS_L5D6_Ctr	noSig	NA
1988	KWMTBOMO01988	0.014	0.526	0.094	9.29e-01	1	-7.808	L5D6_OR_VS_L5D6_Ctr	noSig	LOC100533206
1989	KWMTBOMO01989	0.009	4.648	0.085	9.36e-01	1	-7.809	L5D6_OR_VS_L5D6_Ctr	noSig	LOC101746317
1990	KWMTBOMO01990	-0.064	0.051	-1.472	2.09e-01	0.509	-6.734	L5D6_OR_VS_L5D6_Ctr	noSig	LOC101746456
1991	KWMTBOMO01991	-0.38	0.378	-10.78	2.53e-04	0.00604	1.004	L5D6_OR_VS_L5D6_Ctr	noSig	LOC101743398
1992	KWMTBOMO01992	0	0	0	1.00e+00	1	-7.814	L5D6_OR_VS_L5D6_Ctr	noSig	LOC101743678
1993	KWMTBOMO01993	-0.268	3.242	-1.636	1.71e-01	0.443	-6.533	L5D6_OR_VS_L5D6_Ctr	noSig	SRC
1994	KWMTBOMO01994	-0.081	3.043	-0.294	7.82e-01	1	-7.761	L5D6_OR_VS_L5D6_Ctr	noSig	NA
1995	KWMTBOMO01995	-0.604	2.411	-4.388	9.57e-03	0.0564	-3.294	L5D6_OR_VS_L5D6_Ctr	noSig	NA
1996	KWMTBOMO01996	-0.545	2.948	-19.598	1.92e-05	0.00212	3.916	L5D6_OR_VS_L5D6_Ctr	down	LOC101741810
1997	KWMTBOMO01997	-1.15	4.093	-13.992	8.27e-05	0.00358	2.296	L5D6_OR_VS_L5D6_Ctr	down	LOC101742102
1998	KWMTBOMO01998	0	0	0	1.00e+00	1	-7.814	L5D6_OR_VS_L5D6_Ctr	noSig	LOC101743827
1999	KWMTBOMO01999	-0.917	3.573	-2.788	4.45e-02	0.172	-5.075	L5D6_OR_VS_L5D6_Ctr	noSig	LOC101737857
[truncated: 14,880 more rows]

## Sheet: 3-L5D6 Yki knockout
	gene_name	logFC	AveExpr	t	P.Value	adj.P.Val	B	Compare	Sign_group	NCBI_id
1	KWMTBOMO00001	0.218	0.34	1.628	1.72e-01	0.422	-6.596	L5D6_KO_VS_L5D6_Ctr	noSig	LOC101740329
2	KWMTBOMO00002	-0.054	0.027	-1.05	3.48e-01	0.61	-7.264	L5D6_KO_VS_L5D6_Ctr	noSig	NA
3	KWMTBOMO00003	0.083	0.041	2.115	9.54e-02	0.293	-5.976	L5D6_KO_VS_L5D6_Ctr	noSig	LOC101741181
4	KWMTBOMO00004	0.444	2.018	4.011	1.31e-02	0.0743	-3.723	L5D6_KO_VS_L5D6_Ctr	noSig	LOC101739479
5	KWMTBOMO00005	0.09	1.831	0.518	6.29e-01	0.929	-7.707	L5D6_KO_VS_L5D6_Ctr	noSig	NA
6	KWMTBOMO00006	-0.803	4.079	-16.821	3.58e-05	0.00298	3.2	L5D6_KO_VS_L5D6_Ctr	down	LOC101741407
7	KWMTBOMO00007	-0.614	1.705	-6.191	2.48e-03	0.026	-1.753	L5D6_KO_VS_L5D6_Ctr	down	LOC101739615
8	KWMTBOMO00008	-0.274	0.537	-8.181	7.89e-04	0.0137	-0.391	L5D6_KO_VS_L5D6_Ctr	noSig	NA
9	KWMTBOMO00009	0	0	0	1.00e+00	1	-7.866	L5D6_KO_VS_L5D6_Ctr	noSig	NA
10	KWMTBOMO00010	-0.018	0.038	-0.706	5.16e-01	0.804	-7.577	L5D6_KO_VS_L5D6_Ctr	noSig	NA
11	KWMTBOMO00011	0	0	0	1.00e+00	1	-7.866	L5D6_KO_VS_L5D6_Ctr	noSig	LOC101741740
12	KWMTBOMO00012	-0.505	0.414	-1.939	1.18e-01	0.328	-6.202	L5D6_KO_VS_L5D6_Ctr	noSig	NA
13	KWMTBOMO00013	-0.607	0.304	-2.101	9.70e-02	0.293	-5.994	L5D6_KO_VS_L5D6_Ctr	noSig	NA
14	KWMTBOMO00014	-0.927	1.409	-5.611	3.68e-03	0.0331	-2.22	L5D6_KO_VS_L5D6_Ctr	down	NA
15	KWMTBOMO00015	-0.396	0.272	-1.353	2.41e-01	0.537	-6.929	L5D6_KO_VS_L5D6_Ctr	noSig	LOC101739758
16	KWMTBOMO00016	0.156	0.21	2.223	8.40e-02	0.269	-5.837	L5D6_KO_VS_L5D6_Ctr	noSig	NA
17	KWMTBOMO00017	0.028	0.014	1.047	3.49e-01	0.61	-7.267	L5D6_KO_VS_L5D6_Ctr	noSig	LOC101741886
18	KWMTBOMO00018	-0.026	0.05	-0.374	7.26e-01	1	-7.782	L5D6_KO_VS_L5D6_Ctr	noSig	LOC101742177
19	KWMTBOMO00019	2.302	1.151	2.913	3.86e-02	0.155	-4.971	L5D6_KO_VS_L5D6_Ctr	noSig	tan
20	KWMTBOMO00020	1.65	7.022	11.171	2.11e-04	0.00688	1.167	L5D6_KO_VS_L5D6_Ctr	up	LOC101742318
21	KWMTBOMO00021	0.557	2.884	2.721	4.76e-02	0.179	-5.207	L5D6_KO_VS_L5D6_Ctr	noSig	LOC732936
22	KWMTBOMO00022	-0.845	2.122	-2.646	5.17e-02	0.19	-5.3	L5D6_KO_VS_L5D6_Ctr	noSig	LOC101742469
23	KWMTBOMO00023	-0.854	0.611	-4.765	6.93e-03	0.0497	-2.971	L5D6_KO_VS_L5D6_Ctr	down	LOC101740028
24	KWMTBOMO00024	-1.197	1.095	-8.971	5.36e-04	0.0113	0.068	L5D6_KO_VS_L5D6_Ctr	down	LOC101740159
25	KWMTBOMO00025	-0.046	0.023	-1.049	3.48e-01	0.61	-7.264	L5D6_KO_VS_L5D6_Ctr	noSig	LOC101742610
26	KWMTBOMO00026	0	0	0	1.00e+00	1	-7.866	L5D6_KO_VS_L5D6_Ctr	noSig	LOC101742756
27	KWMTBOMO00027	-0.099	0.186	-0.691	5.24e-01	0.813	-7.588	L5D6_KO_VS_L5D6_Ctr	noSig	LOC101740430
28	KWMTBOMO00028	0	0	0	1.00e+00	1	-7.866	L5D6_KO_VS_L5D6_Ctr	noSig	LOC101743052
29	KWMTBOMO00029	0	0	0	1.00e+00	1	-7.866	L5D6_KO_VS_L5D6_Ctr	noSig	LOC101742910
30	KWMTBOMO00030	0	0	0	1.00e+00	1	-7.866	L5D6_KO_VS_L5D6_Ctr	noSig	NA
31	KWMTBOMO00031	-0.433	0.426	-2.86	4.09e-02	0.161	-5.036	L5D6_KO_VS_L5D6_Ctr	noSig	LOC101740565
32	KWMTBOMO00032	0.033	0.016	1.048	3.49e-01	0.61	-7.266	L5D6_KO_VS_L5D6_Ctr	noSig	NA
33	KWMTBOMO00033	0	0	0	1.00e+00	1	-7.866	L5D6_KO_VS_L5D6_Ctr	noSig	LOC101743283
34	KWMTBOMO00034	0	0	0	1.00e+00	1	-7.866	L5D6_KO_VS_L5D6_Ctr	noSig	NA
35	KWMTBOMO00035	0.019	0.009	1.043	3.51e-01	0.61	-7.271	L5D6_KO_VS_L5D6_Ctr	noSig	LOC101739644
36	KWMTBOMO00036	-0.041	0.021	-1.049	3.48e-01	0.61	-7.265	L5D6_KO_VS_L5D6_Ctr	noSig	LOC101740839
37	KWMTBOMO00037	0.037	0.019	1.049	3.48e-01	0.61	-7.265	L5D6_KO_VS_L5D6_Ctr	noSig	LOC101743424
38	KWMTBOMO00038	-0.031	0.039	-0.549	6.10e-01	0.91	-7.687	L5D6_KO_VS_L5D6_Ctr	noSig	NA
39	KWMTBOMO00039	0.994	2.738	3.81	1.58e-02	0.0835	-3.938	L5D6_KO_VS_L5D6_Ctr	noSig	LOC101743564
40	KWMTBOMO00040	-0.106	0.067	-1.426	2.21e-01	0.504	-6.843	L5D6_KO_VS_L5D6_Ctr	noSig	LOC101741126
41	KWMTBOMO00041	0	0	0	1.00e+00	1	-7.866	L5D6_KO_VS_L5D6_Ctr	noSig	NA
42	KWMTBOMO00042	0	0	0	1.00e+00	1	-7.866	L5D6_KO_VS_L5D6_Ctr	noSig	LOC101743705
43	KWMTBOMO00043	-0.279	0.695	-0.583	5.88e-01	0.885	-7.665	L5D6_KO_VS_L5D6_Ctr	noSig	NA
44	KWMTBOMO00044	-0.975	0.755	-1.699	1.58e-01	0.397	-6.506	L5D6_KO_VS_L5D6_Ctr	noSig	LOC101743858
45	KWMTBOMO00045	-0.168	1.577	-1.047	3.49e-01	0.61	-7.267	L5D6_KO_VS_L5D6_Ctr	noSig	LOC101744149
46	KWMTBOMO00046	-0.898	1.111	-1.927	1.20e-01	0.331	-6.217	L5D6_KO_VS_L5D6_Ctr	noSig	NA
47	KWMTBOMO00047	-0.393	2.929	-1.516	1.98e-01	0.465	-6.734	L5D6_KO_VS_L5D6_Ctr	noSig	LOC101744289
48	KWMTBOMO00048	0.282	0.141	3.381	2.38e-02	0.11	-4.416	L5D6_KO_VS_L5D6_Ctr	noSig	NA
49	KWMTBOMO00049	0	0	0	1.00e+00	1	-7.866	L5D6_KO_VS_L5D6_Ctr	noSig	NA
50	KWMTBOMO00050	0.836	0.885	3.492	2.14e-02	0.102	-4.29	L5D6_KO_VS_L5D6_Ctr	noSig	LOC101741268
51	KWMTBOMO00051	-0.346	2.557	-2.384	6.96e-02	0.235	-5.631	L5D6_KO_VS_L5D6_Ctr	noSig	LOC101744433
52	KWMTBOMO00052	-0.878	1.425	-5.055	5.53e-03	0.043	-2.703	L5D6_KO_VS_L5D6_Ctr	down	LOC101744817
53	KWMTBOMO00053	0	0	0	1.00e+00	1	-7.866	L5D6_KO_VS_L5D6_Ctr	noSig	L130
54	KWMTBOMO00054	0	0	0	1.00e+00	1	-7.866	L5D6_KO_VS_L5D6_Ctr	noSig	NA
55	KWMTBOMO00055	0.005	0.002	0.947	3.93e-01	0.657	-7.366	L5D6_KO_VS_L5D6_Ctr	noSig	LOC101741548
56	KWMTBOMO00056	-0.111	0.111	-0.97	3.82e-01	0.645	-7.344	L5D6_KO_VS_L5D6_Ctr	noSig	LOC101741691
57	KWMTBOMO00057	-0.967	3.056	-15.961	4.50e-05	0.00321	2.943	L5D6_KO_VS_L5D6_Ctr	down	LOC101736132
58	KWMTBOMO00058	0.035	0.122	0.472	6.59e-01	0.96	-7.733	L5D6_KO_VS_L5D6_Ctr	noSig	NA
59	KWMTBOMO00059	-0.235	0.545	-2.524	5.93e-02	0.21	-5.453	L5D6_KO_VS_L5D6_Ctr	noSig	Bmptp-Z
60	KWMTBOMO00060	-1.204	2.976	-8.831	5.72e-04	0.0117	-0.011	L5D6_KO_VS_L5D6_Ctr	down	LOC105842517
61	KWMTBOMO00061	-0.33	0.486	-5.201	4.95e-03	0.0402	-2.573	L5D6_KO_VS_L5D6_Ctr	noSig	LOC101741988
62	KWMTBOMO00062	0	0	0	1.00e+00	1	-7.866	L5D6_KO_VS_L5D6_Ctr	noSig	NA
63	KWMTBOMO00063	-0.745	0.665	-1.339	2.45e-01	0.543	-6.945	L5D6_KO_VS_L5D6_Ctr	noSig	NA
64	KWMTBOMO00064	-0.694	2.172	-2.857	4.11e-02	0.161	-5.039	L5D6_KO_VS_L5D6_Ctr	noSig	LOC101745111
65	KWMTBOMO00065	-1.071	3.063	-3.262	2.69e-02	0.12	-4.555	L5D6_KO_VS_L5D6_Ctr	noSig	LOC101745262
66	KWMTBOMO00066	0.08	0.04	1.05	3.48e-01	0.61	-7.263	L5D6_KO_VS_L5D6_Ctr	noSig	LOC110386353
67	KWMTBOMO00067	0.179	5.64	1.446	2.15e-01	0.495	-6.818	L5D6_KO_VS_L5D6_Ctr	noSig	LOC101745405
68	KWMTBOMO00068	0.095	4.091	0.42	6.94e-01	0.989	-7.76	L5D6_KO_VS_L5D6_Ctr	noSig	BLOS2
69	KWMTBOMO00069	-0.018	0.023	-0.541	6.15e-01	0.915	-7.693	L5D6_KO_VS_L5D6_Ctr	noSig	LOC101742128
70	KWMTBOMO00070	0	0	0	1.00e+00	1	-7.866	L5D6_KO_VS_L5D6_Ctr	noSig	LOC101742648
71	KWMTBOMO00071	0.033	0.016	1.048	3.49e-01	0.61	-7.266	L5D6_KO_VS_L5D6_Ctr	noSig	NA
72	KWMTBOMO00072	-2.009	1.07	-16.324	4.08e-05	0.0031	3.053	L5D6_KO_VS_L5D6_Ctr	down	NA
73	KWMTBOMO00073	0.01	0.005	1.021	3.60e-01	0.616	-7.293	L5D6_KO_VS_L5D6_Ctr	noSig	LOC105842242
74	KWMTBOMO00074	0.144	0.131	1.278	2.64e-01	0.575	-7.016	L5D6_KO_VS_L5D6_Ctr	noSig	NA
75	KWMTBOMO00075	-0.045	0.175	-0.534	6.19e-01	0.919	-7.697	L5D6_KO_VS_L5D6_Ctr	noSig	NA
76	KWMTBOMO00076	-0.172	0.086	-1.05	3.48e-01	0.61	-7.263	L5D6_KO_VS_L5D6_Ctr	noSig	LOC101745545
77	KWMTBOMO00077	-0.014	0.007	-1.037	3.53e-01	0.61	-7.277	L5D6_KO_VS_L5D6_Ctr	noSig	LOC101742420
78	KWMTBOMO00078	0.037	0.019	1.049	3.48e-01	0.61	-7.265	L5D6_KO_VS_L5D6_Ctr	noSig	NA
79	KWMTBOMO00079	-0.224	0.472	-1.574	1.84e-01	0.443	-6.662	L5D6_KO_VS_L5D6_Ctr	noSig	LOC101745928
80	KWMTBOMO00080	-0.35	1.444	-7.942	8.93e-04	0.0146	-0.538	L5D6_KO_VS_L5D6_Ctr	noSig	LOC101742566
81	KWMTBOMO00081	0.381	3.723	5.114	5.28e-03	0.0417	-2.65	L5D6_KO_VS_L5D6_Ctr	noSig	LOC101746314
82	KWMTBOMO00082	2.045	1.568	3.653	1.83e-02	0.0917	-4.11	L5D6_KO_VS_L5D6_Ctr	noSig	LOC101735720
83	KWMTBOMO00083	0.472	2.607	2.96	3.67e-02	0.15	-4.913	L5D6_KO_VS_L5D6_Ctr	noSig	NA
84	KWMTBOMO00084	-0.322	0.257	-1.145	3.11e-01	0.61	-7.163	L5D6_KO_VS_L5D6_Ctr	noSig	NA
85	KWMTBOMO00085	-0.274	0.4	-1.592	1.80e-01	0.436	-6.641	L5D6_KO_VS_L5D6_Ctr	noSig	LOC101746452
86	KWMTBOMO00086	-0.055	0.138	-0.592	5.83e-01	0.879	-7.66	L5D6_KO_VS_L5D6_Ctr	noSig	LOC101746594
87	KWMTBOMO00087	0	0	0	1.00e+00	1	-7.866	L5D6_KO_VS_L5D6_Ctr	noSig	NA
88	KWMTBOMO00088	0	0	0	1.00e+00	1	-7.866	L5D6_KO_VS_L5D6_Ctr	noSig	LOC101746820
89	KWMTBOMO00089	-1.234	1.13	-12.43	1.33e-04	0.00532	1.702	L5D6_KO_VS_L5D6_Ctr	down	LOC101742707
90	KWMTBOMO00090	-0.506	0.711	-2.923	3.82e-02	0.154	-4.958	L5D6_KO_VS_L5D6_Ctr	noSig	LOC101742856
91	KWMTBOMO00091	0.664	0.503	4.918	6.14e-03	0.046	-2.828	L5D6_KO_VS_L5D6_Ctr	up	LOC101742998
92	KWMTBOMO00092	0.476	2.218	1.595	1.79e-01	0.435	-6.636	L5D6_KO_VS_L5D6_Ctr	noSig	LOC101739801
93	KWMTBOMO00093	-0.38	1.567	-0.76	4.86e-01	0.771	-7.534	L5D6_KO_VS_L5D6_Ctr	noSig	NA
94	KWMTBOMO00094	0.235	1.647	2.204	8.59e-02	0.273	-5.861	L5D6_KO_VS_L5D6_Ctr	noSig	LOC101746961
95	KWMTBOMO00095	-0.245	0.155	-1.362	2.39e-01	0.532	-6.918	L5D6_KO_VS_L5D6_Ctr	noSig	NA
96	KWMTBOMO00096	0	0	0	1.00e+00	1	-7.866	L5D6_KO_VS_L5D6_Ctr	noSig	LOC100750224
97	KWMTBOMO00097	-0.345	5.319	-1.678	1.62e-01	0.404	-6.533	L5D6_KO_VS_L5D6_Ctr	noSig	LOC101735670
98	KWMTBOMO00098	-1.349	2.541	-5.538	3.87e-03	0.0344	-2.282	L5D6_KO_VS_L5D6_Ctr	down	LOC101735897
99	KWMTBOMO00099	-1.409	2.53	-9.485	4.23e-04	0.00979	0.347	L5D6_KO_VS_L5D6_Ctr	down	LOC101736024
100	KWMTBOMO00100	-0.17	0.337	-1.407	2.26e-01	0.513	-6.865	L5D6_KO_VS_L5D6_Ctr	noSig	LOC101743284
101	KWMTBOMO00101	0.073	0.055	1.649	1.68e-01	0.415	-6.569	L5D6_KO_VS_L5D6_Ctr	noSig	NA
102	KWMTBOMO00102	0.559	0.464	6.338	2.26e-03	0.0246	-1.641	L5D6_KO_VS_L5D6_Ctr	up	LOC101743425
103	KWMTBOMO00103	0	0	0	1.00e+00	1	-7.866	L5D6_KO_VS_L5D6_Ctr	noSig	LOC101736161
104	KWMTBOMO00104	-0.078	1.368	-0.434	6.85e-01	0.98	-7.753	L5D6_KO_VS_L5D6_Ctr	noSig	LOC101736377
105	KWMTBOMO00105	-0.749	1.89	-2.763	4.54e-02	0.173	-5.154	L5D6_KO_VS_L5D6_Ctr	noSig	LOC101736593
106	KWMTBOMO00106	0.548	2.216	1.945	1.17e-01	0.326	-6.194	L5D6_KO_VS_L5D6_Ctr	noSig	LOC101736825
107	KWMTBOMO00107	-0.14	0.207	-2.443	6.50e-02	0.224	-5.555	L5D6_KO_VS_L5D6_Ctr	noSig	NA
108	KWMTBOMO00108	0.637	1.906	1.516	1.98e-01	0.465	-6.733	L5D6_KO_VS_L5D6_Ctr	noSig	NA
109	KWMTBOMO00109	-0.453	0.535	-2.327	7.44e-02	0.246	-5.704	L5D6_KO_VS_L5D6_Ctr	noSig	LOC101743706
110	KWMTBOMO00110	0	0	0	1.00e+00	1	-7.866	L5D6_KO_VS_L5D6_Ctr	noSig	LOC101737036
111	KWMTBOMO00111	0.125	0.134	1.642	1.69e-01	0.417	-6.578	L5D6_KO_VS_L5D6_Ctr	noSig	Bmap-A
112	KWMTBOMO00112	-0.081	0.069	-1.387	2.31e-01	0.521	-6.888	L5D6_KO_VS_L5D6_Ctr	noSig	ap
113	KWMTBOMO00113	0	0	0	1.00e+00	1	-7.866	L5D6_KO_VS_L5D6_Ctr	noSig	LOC105842502
114	KWMTBOMO00114	-0.054	0.027	-1.05	3.48e-01	0.61	-7.264	L5D6_KO_VS_L5D6_Ctr	noSig	NA
115	KWMTBOMO00115	0	0	0	1.00e+00	1	-7.866	L5D6_KO_VS_L5D6_Ctr	noSig	NA
116	KWMTBOMO00116	0.043	0.183	0.451	6.73e-01	0.97	-7.744	L5D6_KO_VS_L5D6_Ctr	noSig	NA
117	KWMTBOMO00117	0.12	0.101	1.184	2.96e-01	0.61	-7.12	L5D6_KO_VS_L5D6_Ctr	noSig	NA
118	KWMTBOMO00118	-0.065	0.032	-1.89	1.25e-01	0.339	-6.264	L5D6_KO_VS_L5D6_Ctr	noSig	LOC101744290
119	KWMTBOMO00119	0	0	0	1.00e+00	1	-7.866	L5D6_KO_VS_L5D6_Ctr	noSig	LOC101744434
120	KWMTBOMO00120	-0.253	0.127	-1.676	1.62e-01	0.405	-6.536	L5D6_KO_VS_L5D6_Ctr	noSig	LOC101744584
121	KWMTBOMO00121	0	0	0	1.00e+00	1	-7.866	L5D6_KO_VS_L5D6_Ctr	noSig	LOC101737320
122	KWMTBOMO00122	0.135	1.741	0.513	6.33e-01	0.933	-7.71	L5D6_KO_VS_L5D6_Ctr	noSig	LOC101737462
123	KWMTBOMO00123	0.019	0.052	0.662	5.41e-01	0.833	-7.61	L5D6_KO_VS_L5D6_Ctr	noSig	LOC101737605
124	KWMTBOMO00124	-0.46	2.356	-2.204	8.59e-02	0.273	-5.862	L5D6_KO_VS_L5D6_Ctr	noSig	LOC101744726
125	KWMTBOMO00125	0	0	0	1.00e+00	1	-7.866	L5D6_KO_VS_L5D6_Ctr	noSig	NA
126	KWMTBOMO00126	0	0	0	1.00e+00	1	-7.866	L5D6_KO_VS_L5D6_Ctr	noSig	Mtnr
127	KWMTBOMO00127	-0.21	0.662	-2.426	6.63e-02	0.227	-5.577	L5D6_KO_VS_L5D6_Ctr	noSig	LOC101737840
128	KWMTBOMO00128	0.059	0.354	0.237	8.23e-01	1	-7.832	L5D6_KO_VS_L5D6_Ctr	noSig	NA
129	KWMTBOMO00129	-0.77	1.612	-3.488	2.14e-02	0.102	-4.294	L5D6_KO_VS_L5D6_Ctr	noSig	LOC101737973
130	KWMTBOMO00130	0.445	1.574	1.633	1.71e-01	0.42	-6.589	L5D6_KO_VS_L5D6_Ctr	noSig	NA
131	KWMTBOMO00131	0.427	2.477	2.672	5.03e-02	0.186	-5.268	L5D6_KO_VS_L5D6_Ctr	noSig	LOC101744871
132	KWMTBOMO00132	0	0	0	1.00e+00	1	-7.866	L5D6_KO_VS_L5D6_Ctr	noSig	LOC105842495
133	KWMTBOMO00133	0	0	0	1.00e+00	1	-7.866	L5D6_KO_VS_L5D6_Ctr	noSig	NA
134	KWMTBOMO00134	0	0	0	1.00e+00	1	-7.866	L5D6_KO_VS_L5D6_Ctr	noSig	NA
135	KWMTBOMO00135	-0.763	1.073	-15.237	5.51e-05	0.00354	2.715	L5D6_KO_VS_L5D6_Ctr	down	LOC101745159
136	KWMTBOMO00136	0.028	0.038	1.03	3.56e-01	0.614	-7.284	L5D6_KO_VS_L5D6_Ctr	noSig	NA
137	KWMTBOMO00137	-0.304	0.227	-0.825	4.52e-01	0.731	-7.478	L5D6_KO_VS_L5D6_Ctr	noSig	NA
138	KWMTBOMO00138	-0.071	0.036	-1.05	3.48e-01	0.61	-7.264	L5D6_KO_VS_L5D6_Ctr	noSig	NA
139	KWMTBOMO00139	-0.467	1.114	-1.687	1.60e-01	0.402	-6.522	L5D6_KO_VS_L5D6_Ctr	noSig	NA
140	KWMTBOMO00140	0	0	0	1.00e+00	1	-7.866	L5D6_KO_VS_L5D6_Ctr	noSig	LOC101745445
141	KWMTBOMO00141	-0.015	1.376	-0.039	9.71e-01	1	-7.865	L5D6_KO_VS_L5D6_Ctr	noSig	LOC101738102
142	KWMTBOMO00142	0	0	0	1.00e+00	1	-7.866	L5D6_KO_VS_L5D6_Ctr	noSig	LOC101738234
143	KWMTBOMO00143	0	0	0	1.00e+00	1	-7.866	L5D6_KO_VS_L5D6_Ctr	noSig	NA
144	KWMTBOMO00144	-0.103	0.052	-1.05	3.48e-01	0.61	-7.263	L5D6_KO_VS_L5D6_Ctr	noSig	NA
145	KWMTBOMO00145	0.014	0.017	1.381	2.33e-01	0.524	-6.895	L5D6_KO_VS_L5D6_Ctr	noSig	LOC101738460
146	KWMTBOMO00146	0.065	0.033	2.096	9.76e-02	0.293	-6	L5D6_KO_VS_L5D6_Ctr	noSig	LOC101738591
147	KWMTBOMO00147	0.846	4.429	5.132	5.21e-03	0.0414	-2.634	L5D6_KO_VS_L5D6_Ctr	up	LOC732866
148	KWMTBOMO00148	0.515	1.8	2.928	3.80e-02	0.153	-4.953	L5D6_KO_VS_L5D6_Ctr	noSig	LOC101738820
149	KWMTBOMO00149	-0.332	0.303	-1.446	2.15e-01	0.495	-6.818	L5D6_KO_VS_L5D6_Ctr	noSig	NA
150	KWMTBOMO00150	-0.201	0.491	-1.079	3.36e-01	0.61	-7.233	L5D6_KO_VS_L5D6_Ctr	noSig	NA
151	KWMTBOMO00151	0	0	0	1.00e+00	1	-7.866	L5D6_KO_VS_L5D6_Ctr	noSig	LOC101739052
152	KWMTBOMO00152	-0.191	0.096	-2.095	9.77e-02	0.293	-6.001	L5D6_KO_VS_L5D6_Ctr	noSig	LOC101739198
153	KWMTBOMO00153	-1.201	2.087	-8.523	6.64e-04	0.0125	-0.187	L5D6_KO_VS_L5D6_Ctr	down	LOC101745741
154	KWMTBOMO00154	0.218	3.421	2.593	5.49e-02	0.198	-5.367	L5D6_KO_VS_L5D6_Ctr	noSig	LOC101739335
155	KWMTBOMO00155	0.108	0.948	0.548	6.11e-01	0.911	-7.688	L5D6_KO_VS_L5D6_Ctr	noSig	LOC101745886
156	KWMTBOMO00156	0.074	0.037	2.053	1.03e-01	0.298	-6.055	L5D6_KO_VS_L5D6_Ctr	noSig	nwk
157	KWMTBOMO00157	-1.554	1.803	-12.282	1.40e-04	0.00546	1.642	L5D6_KO_VS_L5D6_Ctr	down	LOC101746022
158	KWMTBOMO00158	-1.606	3.04	-40.305	7.75e-07	0.000503	6.984	L5D6_KO_VS_L5D6_Ctr	down	LOC101746164
159	KWMTBOMO00159	0.873	0.436	4.545	8.29e-03	0.0554	-3.183	L5D6_KO_VS_L5D6_Ctr	noSig	LOC733108
160	KWMTBOMO00160	-1.955	1.446	-11.224	2.06e-04	0.00682	1.191	L5D6_KO_VS_L5D6_Ctr	down	LOC101746595
161	KWMTBOMO00161	-0.034	0.372	-0.427	6.89e-01	0.984	-7.757	L5D6_KO_VS_L5D6_Ctr	noSig	NA
162	KWMTBOMO00162	-0.013	0.081	-0.152	8.86e-01	1	-7.852	L5D6_KO_VS_L5D6_Ctr	noSig	NA
163	KWMTBOMO00163	0.318	0.159	4.425	9.16e-03	0.059	-3.3	L5D6_KO_VS_L5D6_Ctr	noSig	NA
164	KWMTBOMO00164	-0.222	0.265	-1.632	1.71e-01	0.421	-6.591	L5D6_KO_VS_L5D6_Ctr	noSig	NA
165	KWMTBOMO00165	0	0	0	1.00e+00	1	-7.866	L5D6_KO_VS_L5D6_Ctr	noSig	LOC101738352
166	KWMTBOMO00166	0	0	0	1.00e+00	1	-7.866	L5D6_KO_VS_L5D6_Ctr	noSig	LOC101738623
167	KWMTBOMO00167	-0.679	2.739	-6.284	2.34e-03	0.0252	-1.682	L5D6_KO_VS_L5D6_Ctr	down	LOC101738756
168	KWMTBOMO00168	-0.539	1.128	-2.815	4.30e-02	0.166	-5.09	L5D6_KO_VS_L5D6_Ctr	noSig	DnaJ-18
169	KWMTBOMO00169	-0.587	1.605	-3.513	2.09e-02	0.1	-4.266	L5D6_KO_VS_L5D6_Ctr	noSig	LOC101741679
170	KWMTBOMO00170	0.028	0.014	1.047	3.49e-01	0.61	-7.267	L5D6_KO_VS_L5D6_Ctr	noSig	LOC101741586
171	KWMTBOMO00171	-0.009	0.019	-0.353	7.40e-01	1	-7.791	L5D6_KO_VS_L5D6_Ctr	noSig	LOC100174848
172	KWMTBOMO00172	0	0	0	1.00e+00	1	-7.866	L5D6_KO_VS_L5D6_Ctr	noSig	LOC110385829
173	KWMTBOMO00173	0	0	0	1.00e+00	1	-7.866	L5D6_KO_VS_L5D6_Ctr	noSig	NA
174	KWMTBOMO00174	-0.054	0.027	-1.05	3.48e-01	0.61	-7.264	L5D6_KO_VS_L5D6_Ctr	noSig	LOC101739187
175	KWMTBOMO00175	-0.022	0.039	-0.405	7.04e-01	0.996	-7.768	L5D6_KO_VS_L5D6_Ctr	noSig	NA
176	KWMTBOMO00176	-0.257	1.028	-0.625	5.63e-01	0.857	-7.637	L5D6_KO_VS_L5D6_Ctr	noSig	LOC101741973
177	KWMTBOMO00177	-0.621	0.408	-3.635	1.86e-02	0.0927	-4.13	L5D6_KO_VS_L5D6_Ctr	noSig	LOC101742113
178	KWMTBOMO00178	-1.138	1.133	-4.978	5.86e-03	0.0446	-2.773	L5D6_KO_VS_L5D6_Ctr	down	NA
179	KWMTBOMO00179	-0.775	1.125	-4.131	1.18e-02	0.0689	-3.598	L5D6_KO_VS_L5D6_Ctr	noSig	PLCg
180	KWMTBOMO00180	-0.105	2.795	-0.529	6.23e-01	0.923	-7.7	L5D6_KO_VS_L5D6_Ctr	noSig	LOC101739325
181	KWMTBOMO00181	-0.675	3.353	-5.125	5.24e-03	0.0415	-2.641	L5D6_KO_VS_L5D6_Ctr	down	LOC101742407
182	KWMTBOMO00182	1.759	1.125	5.551	3.83e-03	0.0342	-2.27	L5D6_KO_VS_L5D6_Ctr	up	LOC101742896
183	KWMTBOMO00183	-0.031	0.148	-0.273	7.97e-01	1	-7.821	L5D6_KO_VS_L5D6_Ctr	noSig	NA
184	KWMTBOMO00184	-0.11	1.685	-1.155	3.07e-01	0.61	-7.153	L5D6_KO_VS_L5D6_Ctr	noSig	Fkbp13
185	KWMTBOMO00185	-0.086	0.067	-2.401	6.83e-02	0.232	-5.61	L5D6_KO_VS_L5D6_Ctr	noSig	NA
186	KWMTBOMO00186	-0.501	1.184	-2.295	7.72e-02	0.253	-5.745	L5D6_KO_VS_L5D6_Ctr	noSig	Hepa
187	KWMTBOMO00187	0.011	0.27	0.047	9.64e-01	1	-7.865	L5D6_KO_VS_L5D6_Ctr	noSig	Hig
188	KWMTBOMO00188	-1.134	1.072	-10.434	2.82e-04	0.00797	0.824	L5D6_KO_VS_L5D6_Ctr	down	Cap-d3
189	KWMTBOMO00189	-0.3	0.376	-9.547	4.12e-04	0.0097	0.379	L5D6_KO_VS_L5D6_Ctr	noSig	Lap
190	KWMTBOMO00190	-0.438	0.685	-3.955	1.38e-02	0.077	-3.782	L5D6_KO_VS_L5D6_Ctr	noSig	Kettin
191	KWMTBOMO00191	0.293	0.256	4.831	6.58e-03	0.0479	-2.91	L5D6_KO_VS_L5D6_Ctr	noSig	Titin2
192	KWMTBOMO00192	2.47	1.566	7.601	1.07e-03	0.0162	-0.755	L5D6_KO_VS_L5D6_Ctr	up	Miple
193	KWMTBOMO00193	0	0	0	1.00e+00	1	-7.866	L5D6_KO_VS_L5D6_Ctr	noSig	NA
194	KWMTBOMO00194	0	0	0	1.00e+00	1	-7.866	L5D6_KO_VS_L5D6_Ctr	noSig	LOC101739467
195	KWMTBOMO00195	-0.689	2.383	-3.231	2.77e-02	0.122	-4.59	L5D6_KO_VS_L5D6_Ctr	noSig	Syx6
196	KWMTBOMO00196	-0.121	3.559	-0.538	6.17e-01	0.917	-7.695	L5D6_KO_VS_L5D6_Ctr	noSig	Pm-scl
197	KWMTBOMO00197	-0.036	4.023	-0.226	8.32e-01	1	-7.835	L5D6_KO_VS_L5D6_Ctr	noSig	NA
198	KWMTBOMO00198	-0.016	0.099	-0.141	8.94e-01	1	-7.854	L5D6_KO_VS_L5D6_Ctr	noSig	LOC101739607
199	KWMTBOMO00199	-0.046	0.023	-1.049	3.48e-01	0.61	-7.264	L5D6_KO_VS_L5D6_Ctr	noSig	Tkz
200	KWMTBOMO00200	-1.198	6.101	-13.562	9.13e-05	0.00457	2.137	L5D6_KO_VS_L5D6_Ctr	down	Ubcd4
201	KWMTBOMO00201	-0.202	5.959	-2.41	6.75e-02	0.23	-5.597	L5D6_KO_VS_L5D6_Ctr	noSig	LOC101743037
202	KWMTBOMO00202	0	0	0	1.00e+00	1	-7.866	L5D6_KO_VS_L5D6_Ctr	noSig	LOC101743368
203	KWMTBOMO00203	-1.065	2.838	-7.363	1.22e-03	0.0174	-0.911	L5D6_KO_VS_L5D6_Ctr	down	LOC101743510
204	KWMTBOMO00204	-0.034	0.054	-0.449	6.75e-01	0.971	-7.745	L5D6_KO_VS_L5D6_Ctr	noSig	LOC101739748
205	KWMTBOMO00205	-0.805	2.698	-14.185	7.52e-05	0.00415	2.361	L5D6_KO_VS_L5D6_Ctr	down	LOC101739885
206	KWMTBOMO00206	-0.889	1.358	-2.502	6.09e-02	0.214	-5.482	L5D6_KO_VS_L5D6_Ctr	noSig	NA
207	KWMTBOMO00207	-0.671	1.728	-3.417	2.30e-02	0.107	-4.375	L5D6_KO_VS_L5D6_Ctr	noSig	NA
208	KWMTBOMO00208	-0.002	0.906	-0.006	9.96e-01	1	-7.866	L5D6_KO_VS_L5D6_Ctr	noSig	LOC101743847
209	KWMTBOMO00209	-0.913	7.197	-7.146	1.38e-03	0.0185	-1.058	L5D6_KO_VS_L5D6_Ctr	down	LOC101744139
210	KWMTBOMO00210	-0.126	0.524	-0.826	4.51e-01	0.73	-7.477	L5D6_KO_VS_L5D6_Ctr	noSig	DnaJ-17
211	KWMTBOMO00211	-0.214	0.842	-1.301	2.57e-01	0.562	-6.989	L5D6_KO_VS_L5D6_Ctr	noSig	LOC101744420
212	KWMTBOMO00212	0	0	0	1.00e+00	1	-7.866	L5D6_KO_VS_L5D6_Ctr	noSig	LOC105842162
213	KWMTBOMO00213	-0.216	1.664	-1.26	2.70e-01	0.585	-7.036	L5D6_KO_VS_L5D6_Ctr	noSig	LOC101744713
214	KWMTBOMO00214	0.058	0.23	1.927	1.20e-01	0.331	-6.217	L5D6_KO_VS_L5D6_Ctr	noSig	LOC101744860
215	KWMTBOMO00215	0.06	0.072	1.426	2.21e-01	0.504	-6.843	L5D6_KO_VS_L5D6_Ctr	noSig	LOC101740018
216	KWMTBOMO00216	-0.455	0.255	-4.769	6.91e-03	0.0496	-2.968	L5D6_KO_VS_L5D6_Ctr	noSig	LOC101740153
217	KWMTBOMO00217	-0.398	0.949	-1.324	2.50e-01	0.551	-6.962	L5D6_KO_VS_L5D6_Ctr	noSig	NA
218	KWMTBOMO00218	-0.197	0.518	-1.732	1.52e-01	0.386	-6.465	L5D6_KO_VS_L5D6_Ctr	noSig	NA
219	KWMTBOMO00219	0.283	0.521	1.006	3.66e-01	0.624	-7.308	L5D6_KO_VS_L5D6_Ctr	noSig	LOC105842161
220	KWMTBOMO00220	-0.166	0.174	-0.868	4.30e-01	0.704	-7.44	L5D6_KO_VS_L5D6_Ctr	noSig	LOC101745000
221	KWMTBOMO00221	-0.049	0.079	-0.44	6.81e-01	0.976	-7.75	L5D6_KO_VS_L5D6_Ctr	noSig	LOC101740424
222	KWMTBOMO00222	0.107	2.459	0.329	7.58e-01	1	-7.801	L5D6_KO_VS_L5D6_Ctr	noSig	NA
223	KWMTBOMO00223	-0.467	2.88	-2.29	7.76e-02	0.254	-5.751	L5D6_KO_VS_L5D6_Ctr	noSig	Gk
224	KWMTBOMO00224	0.041	0.021	1.049	3.48e-01	0.61	-7.265	L5D6_KO_VS_L5D6_Ctr	noSig	Cyp305b1
225	KWMTBOMO00225	0.17	0.171	2.113	9.56e-02	0.293	-5.978	L5D6_KO_VS_L5D6_Ctr	noSig	NA
226	KWMTBOMO00226	0	0	0	1.00e+00	1	-7.866	L5D6_KO_VS_L5D6_Ctr	noSig	RDL2
227	KWMTBOMO00227	0	0	0	1.00e+00	1	-7.866	L5D6_KO_VS_L5D6_Ctr	noSig	LOC101745296
228	KWMTBOMO00228	0	0	0	1.00e+00	1	-7.866	L5D6_KO_VS_L5D6_Ctr	noSig	LOC101740691
229	KWMTBOMO00229	0.229	0.114	4.373	9.57e-03	0.0607	-3.352	L5D6_KO_VS_L5D6_Ctr	noSig	LOC101740832
230	KWMTBOMO00230	0	0	0	1.00e+00	1	-7.866	L5D6_KO_VS_L5D6_Ctr	noSig	rdl1
231	KWMTBOMO00231	0	0	0	1.00e+00	1	-7.866	L5D6_KO_VS_L5D6_Ctr	noSig	LOC101740977
232	KWMTBOMO00232	0.603	0.329	3.753	1.66e-02	0.0865	-3.999	L5D6_KO_VS_L5D6_Ctr	noSig	NA
233	KWMTBOMO00233	0.307	0.425	2.089	9.84e-02	0.293	-6.008	L5D6_KO_VS_L5D6_Ctr	noSig	NA
234	KWMTBOMO00234	0.014	0.031	0.478	6.55e-01	0.956	-7.73	L5D6_KO_VS_L5D6_Ctr	noSig	LOC101741118
235	KWMTBOMO00235	-0.645	0.713	-3.197	2.87e-02	0.125	-4.631	L5D6_KO_VS_L5D6_Ctr	noSig	LOC101745683
236	KWMTBOMO00236	-1.099	2.553	-11.927	1.59e-04	0.00591	1.495	L5D6_KO_VS_L5D6_Ctr	down	LOC101745832
237	KWMTBOMO00237	0.826	4.853	4.944	6.02e-03	0.0452	-2.805	L5D6_KO_VS_L5D6_Ctr	up	LOC101746062
238	KWMTBOMO00238	1.994	3.952	6.348	2.24e-03	0.0245	-1.633	L5D6_KO_VS_L5D6_Ctr	up	Idgf
239	KWMTBOMO00239	0.05	0.025	1.049	3.48e-01	0.61	-7.264	L5D6_KO_VS_L5D6_Ctr	noSig	LOC101746302
240	KWMTBOMO00240	-0.048	0.08	-0.461	6.66e-01	0.967	-7.739	L5D6_KO_VS_L5D6_Ctr	noSig	LOC101741260
241	KWMTBOMO00241	0.617	0.573	4.326	9.97e-03	0.0622	-3.399	L5D6_KO_VS_L5D6_Ctr	noSig	LOC101742576
242	KWMTBOMO00242	0.008	0.867	0.048	9.64e-01	1	-7.865	L5D6_KO_VS_L5D6_Ctr	noSig	LOC101746534
243	KWMTBOMO00243	0	0	0	1.00e+00	1	-7.866	L5D6_KO_VS_L5D6_Ctr	noSig	LOC101746670
244	KWMTBOMO00244	0.968	0.639	3.398	2.34e-02	0.108	-4.396	L5D6_KO_VS_L5D6_Ctr	noSig	Th
245	KWMTBOMO00245	0.165	0.083	1.05	3.48e-01	0.61	-7.263	L5D6_KO_VS_L5D6_Ctr	noSig	NA
246	KWMTBOMO00246	-0.032	0.111	-0.301	7.77e-01	1	-7.811	L5D6_KO_VS_L5D6_Ctr	noSig	BmMET2
247	KWMTBOMO00247	0.014	0.574	0.071	9.46e-01	1	-7.863	L5D6_KO_VS_L5D6_Ctr	noSig	LOC101746809
248	KWMTBOMO00248	1.386	0.693	6.535	1.99e-03	0.0227	-1.493	L5D6_KO_VS_L5D6_Ctr	up	LOC100302628
249	KWMTBOMO00249	-0.683	0.447	-9.069	5.12e-04	0.011	0.122	L5D6_KO_VS_L5D6_Ctr	down	LOC101741399
250	KWMTBOMO00250	0	0	0	1.00e+00	1	-7.866	L5D6_KO_VS_L5D6_Ctr	noSig	LOC101746951
251	KWMTBOMO00251	0	0	0	1.00e+00	1	-7.866	L5D6_KO_VS_L5D6_Ctr	noSig	LOC105841711
252	KWMTBOMO00252	0	0	0	1.00e+00	1	-7.866	L5D6_KO_VS_L5D6_Ctr	noSig	LOC101741681
253	KWMTBOMO00253	0	0	0	1.00e+00	1	-7.866	L5D6_KO_VS_L5D6_Ctr	noSig	NA
254	KWMTBOMO00254	-0.039	6.317	-0.17	8.73e-01	1	-7.848	L5D6_KO_VS_L5D6_Ctr	noSig	Tpi
255	KWMTBOMO00255	0.079	0.911	0.219	8.36e-01	1	-7.837	L5D6_KO_VS_L5D6_Ctr	noSig	LOC101747083
256	KWMTBOMO00256	-0.728	2.485	-3	3.52e-02	0.145	-4.865	L5D6_KO_VS_L5D6_Ctr	noSig	LOC101747219
257	KWMTBOMO00257	0	0	0	1.00e+00	1	-7.866	L5D6_KO_VS_L5D6_Ctr	noSig	LOC101741824
258	KWMTBOMO00258	0.069	0.034	1.473	2.08e-01	0.484	-6.786	L5D6_KO_VS_L5D6_Ctr	noSig	LOC101735522
259	KWMTBOMO00259	0	0	0	1.00e+00	1	-7.866	L5D6_KO_VS_L5D6_Ctr	noSig	LOC101735659
260	KWMTBOMO00260	0	0	0	1.00e+00	1	-7.866	L5D6_KO_VS_L5D6_Ctr	noSig	NA
261	KWMTBOMO00261	0	0	0	1.00e+00	1	-7.866	L5D6_KO_VS_L5D6_Ctr	noSig	LOC101735933
262	KWMTBOMO00262	0.166	0.083	1.807	1.38e-01	0.361	-6.37	L5D6_KO_VS_L5D6_Ctr	noSig	NA
263	KWMTBOMO00263	0.507	0.254	1.92	1.21e-01	0.333	-6.226	L5D6_KO_VS_L5D6_Ctr	noSig	LOC105842174
264	KWMTBOMO00264	-0.04	0.215	-0.157	8.82e-01	1	-7.851	L5D6_KO_VS_L5D6_Ctr	noSig	LOC101736195
265	KWMTBOMO00265	0.14	3.142	0.403	7.06e-01	0.997	-7.768	L5D6_KO_VS_L5D6_Ctr	noSig	LOC692928
266	KWMTBOMO00266	0.1	0.05	1.799	1.40e-01	0.364	-6.381	L5D6_KO_VS_L5D6_Ctr	noSig	LOC101736368
267	KWMTBOMO00267	-0.012	2.145	-0.057	9.57e-01	1	-7.864	L5D6_KO_VS_L5D6_Ctr	noSig	LOC101736487
268	KWMTBOMO00268	1.387	0.872	2.219	8.44e-02	0.27	-5.842	L5D6_KO_VS_L5D6_Ctr	noSig	BmILP
269	KWMTBOMO00269	0.059	0.029	1.05	3.48e-01	0.61	-7.264	L5D6_KO_VS_L5D6_Ctr	noSig	LOC101736626
[truncated: 16,610 more rows]

## Sheet: 4-gene expression
The TPM expression of genes related to the development of the SG and silk protein synthesis
[truncated: 66 more rows]
