# Supplementary material for: A silkworm model reveals coordinated cellular communities and conserved Hippo regulation in silk production
Source: Research Square preprint supplement (doi:10.21203/rs.3.rs-7747598/v1), 2025-10-01
Supplement: Supplementary file 21 [file Supplementary Data 13.xlsx]

## Sheet: main
Supplementary Data 13. Functional enrichment analysis of DEGs identified in PSGs from L5D3 YkiOE, L5D6 YkiOE and L5D6 YkiKO larvae.
1	Representative GO terms for L5D3 YkiOE
2	Representative GO terms for L5D6 YkiOE
3	Representative GO terms for L5D6 YkiKO
4	KEGG pathways for L5D3 YkiOE
5	KEGG pathways for L5D6 YkiOE
6	KEGG pathways for L5D6 YkiKO

## Sheet: 1-GO-L5D3 Yki overexpressing
		ONTOLOGY	ID	Description	GeneRatio	BgRatio	pvalue	p.adjust	qvalue	geneID	Count
up-regulated	BP.GO:1901566	BP	GO:1901566	organonitrogen compound biosynthetic process	0.619047619047619	0.107798960138648	1.9151197340868e-08	1.81936374738246e-06	1.35066339140859e-06	RpL23/RpS21/RpL37A/LOC101736101/LOC732934/RpL36A/RpP1/RpL29/RpS20/RpL36/RpL37/RpL32/LOC778519	13
	BP.GO:0006412	BP	GO:0006412	translation	0.476190476190476	0.0596187175043328	8.73451494956311e-08	3.01174103483875e-06	2.23586315051741e-06	RpL23/RpS21/RpL37A/RpL36A/RpP1/RpL29/RpS20/RpL36/RpL37/RpL32	10
	BP.GO:0043043	BP	GO:0043043	peptide biosynthetic process	0.476190476190476	0.0603119584055459	9.76400169420867e-08	3.01174103483875e-06	2.23586315051741e-06	RpL23/RpS21/RpL37A/RpL36A/RpP1/RpL29/RpS20/RpL36/RpL37/RpL32	10
	BP.GO:0006518	BP	GO:0006518	peptide metabolic process	0.476190476190476	0.0630849220103986	1.50401088043309e-07	3.01174103483875e-06	2.23586315051741e-06	RpL23/RpS21/RpL37A/RpL36A/RpP1/RpL29/RpS20/RpL36/RpL37/RpL32	10
	BP.GO:0043604	BP	GO:0043604	amide biosynthetic process	0.476190476190476	0.0634315424610052	1.58512686044145e-07	3.01174103483875e-06	2.23586315051741e-06	RpL23/RpS21/RpL37A/RpL36A/RpP1/RpL29/RpS20/RpL36/RpL37/RpL32	10
	BP.GO:0044271	BP	GO:0044271	cellular nitrogen compound biosynthetic process	0.666666666666667	0.160138648180243	2.38775758160756e-07	3.78061617087864e-06	2.80666242048608e-06	RpL23/RpS21/RpL37A/LOC732934/LOC732959/RpL36A/RpP1/RpL29/RpS20/RpL36/LOC101738724/RpL37/RpL32/LOC778519	14
	BP.GO:0043603	BP	GO:0043603	amide metabolic process	0.476190476190476	0.0696707105719237	3.87854713765177e-07	5.26374254395597e-06	3.90770914620554e-06	RpL23/RpS21/RpL37A/RpL36A/RpP1/RpL29/RpS20/RpL36/RpL37/RpL32	10
	BP.GO:0046034	BP	GO:0046034	ATP metabolic process	0.0952380952380952	0.00381282495667244	0.00266858134132096	0.0295688782675662	0.0219514110130408	LOC732934/LOC778519	2
	CC.GO:0005840	CC	GO:0005840	ribosome	0.407407407407407	0.0385136967724437	1.44591620795893e-09	8.96468048934538e-08	7.00127848064325e-08	RpL23/RpS21/RpL37A/LOC692701/RpL36A/RpP1/RpL29/RpS20/RpL36/RpL37/RpL32	11
	CC.GO:0043228	CC	GO:0043228	non-membrane-bounded organelle	0.444444444444444	0.105234608082452	6.23595209839523e-06	0.000128876343366835	0.000100650454921467	RpL23/RpS21/RpL37A/LOC732959/LOC692701/RpL36A/RpP1/RpL29/RpS20/RpL36/RpL37/RpL32	12
	CC.GO:0043232	CC	GO:0043232	intracellular non-membrane-bounded organelle	0.444444444444444	0.105234608082452	6.23595209839523e-06	0.000128876343366835	0.000100650454921467	RpL23/RpS21/RpL37A/LOC732959/LOC692701/RpL36A/RpP1/RpL29/RpS20/RpL36/RpL37/RpL32	12
	CC.GO:1990904	CC	GO:1990904	ribonucleoprotein complex	0.296296296296296	0.0585842148087876	0.00010262998976831	0.0015907648414088	0.00124236303403743	RpL23/RpS21/RpL36A/RpP1/RpL29/RpS20/RpL37/RpL32	8
	CC.GO:0033177	CC	GO:0033177	proton-transporting two-sector ATPase complex, proton-transporting domain	0.0740740740740741	0.0037971250339029	0.00445218876614434	0.0528447662159592	0.0412709549394588	LOC732934/LOC778519	2
	CC.GO:0045259	CC	GO:0045259	proton-transporting ATP synthase complex	0.0740740740740741	0.00406834825061025	0.0051140096338025	0.0528447662159592	0.0412709549394588	LOC732934/LOC778519	2
	CC.GO:0016469	CC	GO:0016469	proton-transporting two-sector ATPase complex	0.0740740740740741	0.00732302685109845	0.0161964061959527	0.132578711482638	0.103541947847222	LOC732934/LOC778519	2
	CC.GO:0098796	CC	GO:0098796	membrane protein complex	0.148148148148148	0.0385136967724437	0.018569120603515	0.132578711482638	0.103541947847222	LOC101736101/LOC732934/LOC101746113/LOC778519	4
	MF.GO:0003735	MF	GO:0003735	structural constituent of ribosome	0.476190476190476	0.0294475541494281	9.07148441926083e-11	3.08430470254868e-09	2.5782113612636e-09	RpL23/RpS21/RpL37A/RpL36A/RpP1/RpL29/RpS20/RpL36/RpL37/RpL32	10
	MF.GO:0005198	MF	GO:0005198	structural molecule activity	0.523809523809524	0.0888293988805062	3.66168998381179e-07	6.22487297248004e-06	5.20345418752201e-06	RpL23/RpS21/RpL37A/RpL36A/RpP1/RpL29/RpS20/RpL36/RpL37/RpL32/Hsp19.9	11
	MF.GO:0015078	MF	GO:0015078	proton transmembrane transporter activity	0.0952380952380952	0.00997809686055001	0.0180962058926141	0.190057985220156	0.158872000029233	LOC732934/LOC778519	2
	MF.GO:0030545	MF	GO:0030545	signaling receptor regulator activity	0.0952380952380952	0.0138719883183256	0.0335396444506158	0.190057985220156	0.158872000029233	LOC100862756/Dpp	2
	MF.GO:0030546	MF	GO:0030546	signaling receptor activator activity	0.0952380952380952	0.0138719883183256	0.0335396444506158	0.190057985220156	0.158872000029233	LOC100862756/Dpp	2
	MF.GO:0048018	MF	GO:0048018	receptor ligand activity	0.0952380952380952	0.0138719883183256	0.0335396444506158	0.190057985220156	0.158872000029233	LOC100862756/Dpp	2
	MF.GO:0005102	MF	GO:0005102	signaling receptor binding	0.0952380952380952	0.0167924069116573	0.0475302075789641	0.230861008240683	0.19297979017023	LOC100862756/Dpp	2
	MF.GO:0022890	MF	GO:0022890	inorganic cation transmembrane transporter activity	0.0952380952380952	0.020199561937211	0.066074033919294	0.249613017028444	0.208654843955665	LOC732934/LOC778519	2
down-regulated	BP.GO:0016070	BP	GO:0016070	RNA metabolic process	0.269230769230769	0.143847487001733	1.12169550258938e-07	5.12614844683345e-05	4.77015771627482e-05	LOC101745832/Per/LOC100529238/LOC101737924/LOC101738262/LOC101739548/LOC101740375/LOC693023/LOC692918/LOC692885/LOC101737741/LOC101737224/LOC101744864/LOC101742229/LOC101737028/LOC101737367/LOC693102/LOC101735663/rcd1/LOC101745903/LOC101745129/LOC101742563/LOC101743195/Rbmx2/LOC101743389/LOC732920/LOC101743557/LOC101737159/LOC101741135/LOC101740037/LOC101735634/LOC101740070/LOC101745439/LOC101741…	63
	BP.GO:0006352	BP	GO:0006352	DNA-templated transcription initiation	0.0384615384615385	0.00831889081455806	5.78015971623199e-05	0.0132076649515901	0.0122904448703038	LOC101745832/LOC101737741/LOC101742229/LOC101745903/LOC101745439/LOC101741347/LOC101741862/LOC101742930/RPA43_N	9
	BP.GO:0006367	BP	GO:0006367	transcription initiation at RNA polymerase II promoter	0.0213675213675214	0.00346620450606586	0.000604292703901596	0.0886884430814777	0.0825293815614811	LOC101745832/LOC101737741/LOC101745439/LOC101741347/LOC101742930	5
	BP.GO:0034660	BP	GO:0034660	ncRNA metabolic process	0.0683760683760684	0.0287694974003466	0.000776266460231752	0.0886884430814777	0.0825293815614811	LOC101737924/LOC101740375/LOC693023/LOC692885/LOC101742563/LOC101743195/LOC101740070/LOC692808/LOC692991/LOC101746130/LOC101737306/LOC101736638/Elp1/LOC101741861/LOC101740812/LOC101739383	16
	BP.GO:0006418	BP	GO:0006418	tRNA aminoacylation for protein translation	0.0256410256410256	0.00658578856152513	0.00294064166689508	0.173033100368928	0.161016636068288	LOC101737924/LOC693023/LOC692991/LOC101737306/LOC101741861/LOC101740812	6
	BP.GO:0043038	BP	GO:0043038	amino acid activation	0.0256410256410256	0.00693240901213172	0.00392079279764392	0.173033100368928	0.161016636068288	LOC101737924/LOC693023/LOC692991/LOC101737306/LOC101741861/LOC101740812	6
	BP.GO:0043039	BP	GO:0043039	tRNA aminoacylation	0.0256410256410256	0.00693240901213172	0.00392079279764392	0.173033100368928	0.161016636068288	LOC101737924/LOC693023/LOC692991/LOC101737306/LOC101741861/LOC101740812	6
	BP.GO:0033036	BP	GO:0033036	macromolecule localization	0.0982905982905983	0.0558058925476603	0.00448340842761037	0.173033100368928	0.161016636068288	LOC101743173/LOC101741777/LOC101745731/Vps4/LOC101736857/LOC101746557/LOC101739513/LOC101738331/LOC101737710/LOC101737752/LOC101743265/LOC101737012/LOC101740461/LOC732950/LOC101746631/LOC101735417/Sec61alpha/Vta1/LOC101743073/LOC101736916/LOC101739859/Srp54/LOC101740528	23
	CC.GO:0005667	CC	GO:0005667	transcription regulator complex	0.034965034965035	0.00895036615134255	0.000125001112762926	0.0142501268549736	0.0115790504454079	LOC101745832/LOC101737741/LOC101742229/LOC101745439/LOC101741347/LOC101742930/Aly/LOC101736484/LOC692891/LOC101736158	10
	CC.GO:0090575	CC	GO:0090575	RNA polymerase II transcription regulator complex	0.0244755244755245	0.00515324111743965	0.000350516042450288	0.0195339352647303	0.01587244970726	LOC101745832/LOC101737741/LOC101745439/LOC101741347/LOC101742930/LOC101736484/LOC101736158	7
	CC.GO:0140513	CC	GO:0140513	nuclear protein-containing complex	0.0804195804195804	0.0387849199891511	0.000514050928019217	0.0195339352647303	0.01587244970726	LOC101745832/LOC101740375/LOC101744476/LOC101737741/LOC101738766/LOC101742226/LOC101735663/LOC101740978/LOC101740037/LOC101745439/LOC101741347/LOC101742930/LOC101738712/LOC101743265/LOC101745714/LOC101736484/LOC692891/LOC101744152/LOC101741204/LOC101736158/LOC101740057/LOC101743073/LOC101742271	23
	CC.GO:1990234	CC	GO:1990234	transferase complex	0.0594405594405594	0.0254949823704909	0.000720237139552154	0.0205267584772364	0.016679175863313	LOC101745832/LOC101747224/LOC101737741/LOC101744864/LOC101738766/LOC101742226/LOC101737159/LOC101745439/LOC101741347/LOC101742930/RPA43_N/LOC101736484/LOC101747121/LOC101744152/LOC101741088/LOC101738415/LOC101740494	17
	CC.GO:0140535	CC	GO:0140535	intracellular protein-containing complex	0.0804195804195804	0.0404122592893952	0.000931027118000932	0.0210973117357735	0.0171427833125399	LOC101745832/LOC101746211/LOC101737741/LOC101737171/LOC101742226/rcd1/LOC101735320/LOC101742661/LOC101737159/LOC767622/LOC101745439/LOC101741347/LOC101742930/LOC692808/LOC101744510/LOC101741071/LOC778515/RPA43_N/LOC101736484/LOC101747121/LOC101744152/Elp1/LOC101741088	23
	CC.GO:0012505	CC	GO:0012505	endomembrane system	0.118881118881119	0.069704366693789	0.00111038482819861	0.0210973117357735	0.0171427833125399	LOC692928/ccdc25/LOC101743173/LOC101737171/LOC693109/LOC101743324/LOC732862/Vps4/LOC101736585/LOC101746557/LOC101745690/LOC101739513/LOC101737710/Cpr/LOC101740181/LOC101746238/LOC778461/LOC101739145/LOC101740964/LOC101738346/LOC101743265/LOC101736188/LOC732950/LOC101736850/LOC101743406/LOC101742178/LOC101738335/Vta1/LOC101743073/LOC101738415/LOC101739859/Srp54/LOC101740528/LOC101741333	34
	CC.GO:0061695	CC	GO:0061695	transferase complex, transferring phosphorus-containing groups	0.0384615384615385	0.0141036072687822	0.00171297220917645	0.0278969759780165	0.0226679029184252	LOC101745832/LOC101737741/LOC101742226/LOC101737159/LOC101745439/LOC101741347/LOC101742930/RPA43_N/LOC101736484/LOC101744152/LOC101740494	11
	CC.GO:0000428	CC	GO:0000428	DNA-directed RNA polymerase complex	0.0314685314685315	0.0111201518850014	0.00342371583532761	0.043367067247483	0.0352382448548338	LOC101745832/LOC101737741/LOC101737159/LOC101745439/LOC101741347/LOC101742930/RPA43_N/LOC101736484/LOC101744152	9
	MF.GO:0140640	MF	GO:0140640	catalytic activity, acting on a nucleic acid	0.0919117647058824	0.0374787052810903	1.89538999160632e-05	0.00407508848195358	0.00379077998321263	LOC101737924/LOC693023/LOC692885/LOC101744385/CHD1/LOC101746400/LOC101735809/LOC101736858/LOC101737159/LOC101743750/LOC101740070/LOC101746121/LOC101741322/LOC101738338/LOC101744510/LOC692991/LOC101738648/LOC101736557/LOC101737477/LOC101737306/LOC101739562/LOC101744152/LOC101741861/LOC101740812/Rad51	25
	MF.GO:0003723	MF	GO:0003723	RNA binding	0.117647058823529	0.0627889997566318	0.000314787458326738	0.0338396517701244	0.0314787458326738	LOC101743700/LOC101738262/Acci/LOC101739548/LOC693023/LOC101738766/LOC101744385/LOC101741777/LOC101735663/LOC101746400/LOC101735809/LOC101743195/LOC733049/LOC101747007/Rbmx2/LOC101745195/LOC101741135/LOC101740439/LOC101735634/LOC101745950/LOC101745279/LOC101738485/LOC101738259/LOC692853/LOC101737306/Nol8/LOC101739432/LOC101742271/Srp54/LOC101735632/LOC101740758/LOC101745546	32
	MF.GO:0140098	MF	GO:0140098	catalytic activity, acting on RNA	0.0625	0.0267705037722074	0.000767273791094304	0.0445413272784042	0.0414337928171202	LOC101737924/LOC693023/LOC692885/LOC101735809/LOC101736858/LOC101737159/LOC101743750/LOC101740070/LOC101746121/LOC101744510/LOC692991/LOC101738648/LOC101737477/LOC101737306/LOC101744152/LOC101741861/LOC101740812	17
	MF.GO:0004812	MF	GO:0004812	aminoacyl-tRNA ligase activity	0.0220588235294118	0.00462399610610854	0.001035844820428	0.0445413272784042	0.0414337928171202	LOC101737924/LOC693023/LOC692991/LOC101737306/LOC101741861/LOC101740812	6
	MF.GO:0016875	MF	GO:0016875	ligase activity, forming carbon-oxygen bonds	0.0220588235294118	0.00462399610610854	0.001035844820428	0.0445413272784042	0.0414337928171202	LOC101737924/LOC693023/LOC692991/LOC101737306/LOC101741861/LOC101740812	6
	MF.GO:0019899	MF	GO:0019899	enzyme binding	0.0220588235294118	0.00486736432221952	0.00139873002495241	0.0499227863834097	0.0464398012868928	LOC101745726/LOC101739193/Cdc37/LOC101736051/LOC101742908/LOC101741088	6
	MF.GO:0140101	MF	GO:0140101	catalytic activity, acting on a tRNA	0.0294117647058824	0.00851788756388416	0.00162539304504125	0.0499227863834097	0.0464398012868928	LOC101737924/LOC693023/LOC692885/LOC101736858/LOC692991/LOC101737306/LOC101741861/LOC101740812	8
	MF.GO:0004386	MF	GO:0004386	helicase activity	0.0294117647058824	0.0107082015088829	0.00728520633390712	0.195789920223754	0.182130158347678	LOC101744385/CHD1/LOC101746400/LOC101735809/LOC101743750/LOC101746121/LOC101738338/LOC101737477	8

## Sheet: 2-GO-L5D6 Yki overexpressing
		ONTOLOGY	ID	Description	GeneRatio	BgRatio	pvalue	p.adjust	qvalue	geneID	Count
up-regulated	BP.GO:0006518	BP	GO:0006518	peptide metabolic process	0.270114942528736	0.0630849220103986	1.435928154234e-19	4.65240721971816e-17	3.79387333381825e-17	RpL23/RpS21/RpL37A/eIF3h/RpL35/LOC692906/RpL15/RpS27/RpL27/LOC692977/RpS14/RpS15A/RpL18/RpL36A/LOC692779/RpL31/LOC778464/RpL27A/RpS16/RpS3/eIF3i/RpL5/RpS8/RpP1/LOC101744517/RpLP2/RpL38/eIF3-S7/RpL29/LOC101738101/RpL22/LOC733116/RpS19/RpL12/RpS12/RpS20/RpS17/RpL36/RpL20/RpL37/RpS4/RpL26/RpS30/RpL32/LOC101737987/RpS11/LOC733122	47
	BP.GO:0043603	BP	GO:0043603	amide metabolic process	0.281609195402299	0.0696707105719237	2.96379949784754e-19	4.80135518651301e-17	3.91533512610385e-17	RpL23/RpS21/RpL37A/eIF3h/RpL35/LOC692906/RpL15/LOC733134/RpS27/RpL27/LOC692977/RpS14/RpS15A/RpL18/RpL36A/LOC692779/RpL31/LOC778464/RpL27A/L(b002)/RpS16/RpS3/eIF3i/RpL5/RpS8/RpP1/LOC101744517/RpLP2/RpL38/eIF3-S7/RpL29/LOC101738101/RpL22/LOC733116/RpS19/RpL12/RpS12/RpS20/RpS17/RpL36/RpL20/RpL37/RpS4/RpL26/RpS30/RpL32/LOC101737987/RpS11/LOC733122	49
	BP.GO:1901566	BP	GO:1901566	organonitrogen compound biosynthetic process	0.344827586206897	0.107798960138648	2.79336635291716e-18	3.01683566115053e-16	2.46012264765687e-16	LOC101740991/gly/RpL23/RpS21/RpL37A/eIF3h/RpL35/LOC732934/adk2/LOC101735807/Pts/AK/RpL15/LOC733134/RpS27/LOC692925/RpL27/RpS14/RpS15A/RpL18/RpL36A/LOC692779/RpL31/RpL27A/L(b002)/RpS16/RpS3/eIF3i/RpL5/LOC100101186/RpS8/RpP1/LOC101744517/RpLP2/RpL38/LOC101744632/eIF3-S7/RpL29/RpL22/LOC733116/RpS19/RpL12/RpS12/RpS20/RpS17/RpL36/RpL20/RpL37/RpS4/RpL26/RpS30/LOC101744040/RpL32/LOC101737987/LOC778517/L…	60
	BP.GO:0043604	BP	GO:0043604	amide biosynthetic process	0.258620689655172	0.0634315424610052	8.56760899974225e-18	6.93976328979122e-16	5.65913120772449e-16	RpL23/RpS21/RpL37A/eIF3h/RpL35/RpL15/LOC733134/RpS27/RpL27/RpS14/RpS15A/RpL18/RpL36A/LOC692779/RpL31/RpL27A/L(b002)/RpS16/RpS3/eIF3i/RpL5/RpS8/RpP1/LOC101744517/RpLP2/RpL38/eIF3-S7/RpL29/RpL22/LOC733116/RpS19/RpL12/RpS12/RpS20/RpS17/RpL36/RpL20/RpL37/RpS4/RpL26/RpS30/RpL32/LOC101737987/RpS11/LOC733122	45
	BP.GO:0006412	BP	GO:0006412	translation	0.247126436781609	0.0596187175043328	2.78226174340438e-17	1.80290560972604e-15	1.47020567914631e-15	RpL23/RpS21/RpL37A/eIF3h/RpL35/RpL15/RpS27/RpL27/RpS14/RpS15A/RpL18/RpL36A/LOC692779/RpL31/RpL27A/RpS16/RpS3/eIF3i/RpL5/RpS8/RpP1/LOC101744517/RpLP2/RpL38/eIF3-S7/RpL29/RpL22/LOC733116/RpS19/RpL12/RpS12/RpS20/RpS17/RpL36/RpL20/RpL37/RpS4/RpL26/RpS30/RpL32/LOC101737987/RpS11/LOC733122	43
	BP.GO:0043043	BP	GO:0043043	peptide biosynthetic process	0.247126436781609	0.0603119584055459	4.46687547702434e-17	2.41211275759314e-15	1.96699253461949e-15	RpL23/RpS21/RpL37A/eIF3h/RpL35/RpL15/RpS27/RpL27/RpS14/RpS15A/RpL18/RpL36A/LOC692779/RpL31/RpL27A/RpS16/RpS3/eIF3i/RpL5/RpS8/RpP1/LOC101744517/RpLP2/RpL38/eIF3-S7/RpL29/RpL22/LOC733116/RpS19/RpL12/RpS12/RpS20/RpS17/RpL36/RpL20/RpL37/RpS4/RpL26/RpS30/RpL32/LOC101737987/RpS11/LOC733122	43
	BP.GO:0044271	BP	GO:0044271	cellular nitrogen compound biosynthetic process	0.350574712643678	0.160138648180243	1.5343637968995e-10	7.10191243136342e-09	5.79135809055301e-09	LOC101740991/LOC101741660/RpL23/RpS21/RpL37A/eIF3h/RpL35/LOC732934/adk2/Pts/RpL15/LOC733134/RpS27/LOC692925/RpL27/RpS14/RpS15A/RpL18/LOC101740207/RpL36A/LOC692779/RpL31/RpL27A/L(b002)/RpS16/RpS3/eIF3i/RpL5/LOC100101186/RpS8/RpP1/LOC101744517/RpLP2/RpL38/LOC101744632/eIF3-S7/RpL29/RpL22/LOC733116/RpS19/RpL12/RpS12/RpS20/RpS17/RpL36/LOC101738724/RpL20/RpL37/RpS4/RpL26/RpS30/RpL32/LOC101743500/LOC10…	61
	BP.GO:0022613	BP	GO:0022613	ribonucleoprotein complex biogenesis	0.109195402298851	0.0266897746967071	6.03495088140914e-08	2.4441551069707e-06	1.99312193583381e-06	LOC101742458/eIF3h/RpL35/RpL7Ae/LOC101745565/LOC732986/LOC101736576/RpL7A/eIF3i/LOC101739155/LOC101744517/eIF3-S7/LOC101746845/LOC101744676/LOC733116/LOC692935/Tinp1/LOC101738785/LOC733122	19
	CC.GO:1990904	CC	GO:1990904	ribonucleoprotein complex	0.272727272727273	0.0585842148087876	2.7138205301301e-25	2.87664976193791e-23	1.65685884997417e-23	RpL23/RpS21/LOC732955/LOC101742458/eIF3h/RpL35/RpL15/RpS27/RpL27/LOC732924/RpS14/RpS15A/RpL7Ae/RpL18/RpL36A/LOC692779/LOC101745565/LOC101738344/LOC732986/RpL31/RpL27A/RpS16/RpS3/LOC101736447/RpL7A/eIF3i/RpL5/RpL30/RpS8/RpP1/LOC101744517/RpLP2/RpL38/eIF3-S7/RpL29/LOC101746845/LOC101744676/RpL22/LOC733116/LOC101737395/RpS19/RpL12/RpS12/RpS20/RpS17/RpL20/RpL37/LOC732985/RpS4/RpL26/RpS30/Tinp1/RpL32/…	57
	CC.GO:0005840	CC	GO:0005840	ribosome	0.205741626794258	0.0385136967724437	1.53144080641373e-21	8.11663627399276e-20	4.67492456694717e-20	RpL23/RpS21/RpL37A/RpL35/RpL15/RpS27/RpL27/LOC692701/RpS14/RpS15A/RpL7Ae/RpL18/RpL36A/LOC692779/RpL31/RpL27A/RpS16/RpS3/RpL7A/RpL5/RpL30/RpS8/RpP1/RpLP2/RpL38/RpL29/RpL22/LOC101737395/RpS19/RpL12/RpS12/RpS20/RpS17/RpL36/RpL20/RpL37/RpS4/RpL26/RpS30/RpL32/LOC101737987/RpS25/RpS11	43
	CC.GO:0043228	CC	GO:0043228	non-membrane-bounded organelle	0.253588516746411	0.105234608082452	2.35658267140021e-10	6.24494407921055e-09	3.59688934055821e-09	RpL23/RpS21/RpL37A/LOC101742458/RpL35/RpL15/LOC101738992/RpS27/RpL27/LOC692701/RpS14/RpS15A/RpL7Ae/RpL18/RpL36A/LOC692779/LOC101745565/LOC732986/RpL31/RpL27A/LOC101746034/RpS16/RpS3/RpL7A/RpL5/RpL30/RpS8/RpP1/RpLP2/RpL38/RpL29/RpL22/LOC101737395/RpS19/RpL12/RpS12/RpS20/RpS17/RpL36/RpL20/RpL37/LOC692935/RpS4/RpL26/RpS30/Tinp1/LOC101738785/LOC100101180/RpL32/LOC101737987/RpS25/Tua1/RpS11	53
	CC.GO:0043232	CC	GO:0043232	intracellular non-membrane-bounded organelle	0.253588516746411	0.105234608082452	2.35658267140021e-10	6.24494407921055e-09	3.59688934055821e-09	RpL23/RpS21/RpL37A/LOC101742458/RpL35/RpL15/LOC101738992/RpS27/RpL27/LOC692701/RpS14/RpS15A/RpL7Ae/RpL18/RpL36A/LOC692779/LOC101745565/LOC732986/RpL31/RpL27A/LOC101746034/RpS16/RpS3/RpL7A/RpL5/RpL30/RpS8/RpP1/RpLP2/RpL38/RpL29/RpL22/LOC101737395/RpS19/RpL12/RpS12/RpS20/RpS17/RpL36/RpL20/RpL37/LOC692935/RpS4/RpL26/RpS30/Tinp1/LOC101738785/LOC100101180/RpL32/LOC101737987/RpS25/Tua1/RpS11	53
	CC.GO:0005829	CC	GO:0005829	cytosol	0.0526315789473684	0.0116625983184161	1.72254079205692e-05	0.000304315539930056	0.000175276080595266	RpS21/RpL35/adk2/LOC692797/RpS3/RpL7A/RpL30/RpP1/RpLP2/LOC101746384/LOC101740502	11
	CC.GO:0098800	CC	GO:0098800	inner mitochondrial membrane protein complex	0.0526315789473684	0.0116625983184161	1.72254079205692e-05	0.000304315539930056	0.000175276080595266	LOC732934/Uccr/LOC692925/LOC101738229/LOC101738548/LOC101745824/LOC101736448/LOC780848/LOC100134926/LOC778517/LOC778519	11
	CC.GO:0022626	CC	GO:0022626	cytosolic ribosome	0.0287081339712919	0.0032546786004882	2.14246758050825e-05	0.000324430805048392	0.000186861834089441	RpL35/RpS3/RpL7A/RpL30/RpP1/RpLP2	6
	CC.GO:0098796	CC	GO:0098796	membrane protein complex	0.100478468899522	0.0385136967724437	3.56363294021855e-05	0.00033493517139511	0.00019291201530205	COPZ/LOC692911/LOC733070/LOC692906/LOC732934/Uccr/LOC692925/LOC101738229/LOC101738548/LOC692977/LOC100101165/LOC101745824/LOC778464/LOC101736448/LOC101744632/LOC101738101/LOC780848/LOC100134926/LOC101742176/LOC778517/LOC778519	21
	MF.GO:0003735	MF	GO:0003735	structural constituent of ribosome	0.191176470588235	0.0294475541494281	1.00861621338612e-22	1.67430291422096e-20	1.61378594141779e-20	RpL23/RpS21/RpL37A/RpL35/RpL15/RpS27/RpL27/RpS14/RpS15A/RpL18/RpL36A/LOC692779/LOC101738983/RpL31/RpL27A/RpS16/RpS3/RpL5/RpL30/RpS8/RpP1/RpLP2/RpL38/RpL29/RpL22/RpS19/RpL12/RpS12/RpS20/RpS17/RpL36/RpL20/RpL37/RpS4/RpL26/RpS30/RpL32/LOC101737987/RpS11	39
	MF.GO:0003723	MF	GO:0003723	RNA binding	0.161764705882353	0.0627889997566318	2.47659409067377e-07	2.05557309525922e-05	1.98127527253901e-05	LOC732955/LOC101742458/LOC101737404/LOC732980/LOC100037428/Spx/LOC732924/VIG/RpL7Ae/LOC101740207/LOC778469/Rsf1/LOC101743111/LOC732886/RpS3/LOC101736576/RpL7A/RpL5/RpL30/LOC101745600/LOC101744517/eIF3-S7/LOC101746845/LOC101744676/LOC101745118/RpL20/RpL37/LOC732985/RpS4/RpL26/LOC101738785/Pabp/LOC733122	33
	MF.GO:0005198	MF	GO:0005198	structural molecule activity	0.196078431372549	0.0888293988805062	7.77749699002609e-07	4.3035483344811e-05	4.14799839468058e-05	RpL23/RpS21/RpL37A/RpL35/RpL15/RpS27/RpL27/RpS14/RpS15A/RpL18/RpL36A/LOC692779/LOC101738983/RpL31/RpL27A/RpS16/RpS3/RpL5/RpL30/RpS8/RpP1/RpLP2/RpL38/RpL29/RpL22/RpS19/RpL12/RpS12/RpS20/RpS17/RpL36/RpL20/RpL37/RpS4/RpL26/RpS30/RpL32/LOC101737987/Tua1/RpS11	40
	MF.GO:0003743	MF	GO:0003743	translation initiation factor activity	0.0392156862745098	0.00949136042832806	0.000522121154613911	0.0216680279164773	0.0208848461845564	eIF3h/LOC100037428/LOC732886/eIF3i/LOC101744517/eIF3-S7/LOC733116/LOC733122	8
	MF.GO:0019843	MF	GO:0019843	rRNA binding	0.0245098039215686	0.00413725967388659	0.00108872830577464	0.036145779751718	0.0348393057847885	LOC101736576/RpL5/RpL20/RpL37/RpS4	5
	MF.GO:0008135	MF	GO:0008135	translation factor activity, RNA binding	0.0392156862745098	0.0133852518861037	0.00522018295154071	0.107660289485225	0.103768953720698	eIF3h/LOC100037428/LOC732886/eIF3i/LOC101744517/eIF3-S7/LOC733116/LOC733122	8
	MF.GO:0090079	MF	GO:0090079	translation regulator activity, nucleic acid binding	0.0392156862745098	0.0133852518861037	0.00522018295154071	0.107660289485225	0.103768953720698	eIF3h/LOC100037428/LOC732886/eIF3i/LOC101744517/eIF3-S7/LOC733116/LOC733122	8
	MF.GO:0016853	MF	GO:0016853	isomerase activity	0.0392156862745098	0.0136286201022147	0.00583700364678929	0.107660289485225	0.103768953720698	LOC101745369/LOC101737404/ERp57/LOC692898/LOC101743182/LOC101746142/LOC101744742/Fkbp12	8
down-regulated	BP.GO:0016070	BP	GO:0016070	RNA metabolic process	0.246031746031746	0.143847487001733	8.97398281727212e-09	4.19084997566608e-06	3.68405610393277e-06	LOC101745832/Per/LOC101745755/LOC101742096/LOC101738789/LOC101739296/LOC100529238/E(spl)mbeta/LOC101737924/LOC101735802/LOC101743127/LOC732942/LOC101743842/LOC101739548/LOC693023/LOC692918/LOC101737999/LOC101737224/LOC101736453/LOC101744864/LOC101739085/LOC101737028/LOC101737367/LOC693102/LOC101738475/FRSB/LOC101745129/LOC101742563/LOC101744339/LOC101744431/LOC101743389/LOC101741286/Rel/LOC101743…	93
	BP.GO:0051252	BP	GO:0051252	regulation of RNA metabolic process	0.113756613756614	0.0561525129982669	1.73230412666369e-06	0.000319933291580706	0.000281244187346952	Per/LOC101742096/LOC101738789/LOC101739296/LOC100529238/E(spl)mbeta/LOC101735802/LOC101737999/LOC101736453/LOC101739085/LOC101737028/LOC101737367/LOC101745129/LOC101743389/LOC101741286/Rel/LOC101745399/LOC693081/Dorsal/LOC100862747/LOC101741483/LOC101745231/LOC101736526/LOC101737954/BmEts2/E74/LOC101745620/LOC101737259/LOC101740737/LOC101746052/LOC101738425/Elf/LOC101742520/MOF/LOC101740596/LOC10…	43
	BP.GO:0032774	BP	GO:0032774	RNA biosynthetic process	0.132275132275132	0.0703639514731369	2.65252945966027e-06	0.000319933291580706	0.000281244187346952	LOC101745832/Per/LOC101745755/LOC101742096/LOC101738789/LOC101739296/LOC100529238/E(spl)mbeta/LOC101735802/LOC101743127/LOC732942/LOC692918/LOC101737999/LOC101736453/LOC101739085/LOC101737028/LOC101738475/LOC101744339/LOC101743389/LOC101741286/Rel/LOC101737159/LOC101745399/LOC101745439/LOC693081/Dorsal/LOC100862747/LOC101741483/Tbp/LOC101745231/LOC101736526/LOC101737954/BmEts2/Aly/E74/LOC10174562…	50
	BP.GO:0019219	BP	GO:0019219	regulation of nucleobase-containing compound metabolic process	0.116402116402116	0.0589254766031196	2.74032797927799e-06	0.000319933291580706	0.000281244187346952	Per/LOC101742096/LOC101738789/LOC101739296/LOC100529238/E(spl)mbeta/LOC101735802/LOC101737999/LOC101736453/LOC101739085/LOC101737028/LOC101737367/LOC101745129/LOC101743389/LOC101741286/Rel/LOC101736870/LOC101745399/LOC693081/Dorsal/LOC100862747/LOC101741483/LOC101745231/LOC101736526/LOC101737954/BmEts2/E74/LOC101745620/LOC101737259/LOC101740737/LOC101746052/LOC101738425/Elf/LOC101742520/MOF/LOC10…	44
	BP.GO:0006351	BP	GO:0006351	DNA-templated transcription	0.12962962962963	0.0700173310225303	5.41119979724049e-06	0.000484946126121668	0.000426302240927422	LOC101745832/Per/LOC101745755/LOC101742096/LOC101738789/LOC101739296/LOC100529238/E(spl)mbeta/LOC101735802/LOC732942/LOC692918/LOC101737999/LOC101736453/LOC101739085/LOC101737028/LOC101738475/LOC101744339/LOC101743389/LOC101741286/Rel/LOC101737159/LOC101745399/LOC101745439/LOC693081/Dorsal/LOC100862747/LOC101741483/Tbp/LOC101745231/LOC101736526/LOC101737954/BmEts2/Aly/E74/LOC101745620/LOC10173725…	49
	BP.GO:0034654	BP	GO:0034654	nucleobase-containing compound biosynthetic process	0.156084656084656	0.0904679376083189	6.28439621784688e-06	0.000484946126121668	0.000426302240927422	LOC101745832/LOC101746722/Per/LOC101745755/LOC101742096/LOC101738789/LOC101739296/LOC100529238/E(spl)mbeta/LOC105841836/LOC101735802/LOC101743127/LOC732942/LOC692918/LOC101737999/LOC101736453/LOC101739085/RnrS/LOC101737028/LOC101738475/LOC101744339/LOC101738185/LOC101743389/LOC101741286/Rel/LOC101737159/Kmo/LOC101745399/LOC101745439/LOC693081/Dorsal/LOC100862747/LOC101741483/Tbp/LOC101745231/LOC1…	59
	BP.GO:0018130	BP	GO:0018130	heterocycle biosynthetic process	0.164021164021164	0.097053726169844	7.26899974914706e-06	0.000484946126121668	0.000426302240927422	LOC101745832/LOC101746722/Per/LOC101745755/LOC101742096/LOC101738789/LOC101739296/LOC100529238/E(spl)mbeta/LOC105841836/LOC101735802/LOC101743127/LOC732942/LOC692918/LOC101737999/LOC101736453/LOC101739085/RnrS/LOC101737028/LOC101738475/LOC101744339/LOC101738185/mal/LOC101743389/LOC101741286/Rel/LOC101737159/Kmo/LOC101745399/LOC101745439/LOC693081/Dorsal/LOC100862747/LOC101741483/Tbp/LOC101745231/…	62
	BP.GO:0019438	BP	GO:0019438	aromatic compound biosynthetic process	0.161375661375661	0.0963604852686308	1.19119601678577e-05	0.00069536067479869	0.000611271640192695	LOC101745832/LOC101746722/Per/LOC101745755/LOC101742096/LOC101738789/LOC101739296/LOC100529238/E(spl)mbeta/LOC105841836/LOC101735802/LOC101743127/LOC732942/LOC692918/LOC101737999/LOC101736453/LOC101739085/RnrS/LOC101737028/LOC101738475/LOC101744339/LOC101738185/LOC101743389/LOC101741286/Rel/LOC101737159/Kmo/LOC101745399/LOC101745439/LOC693081/Dorsal/LOC100862747/LOC101741483/Tbp/LOC101745231/LOC1…	61
	CC.GO:0005694	CC	GO:0005694	chromosome	0.0399159663865546	0.0206129644697586	0.00282244532149196	0.20436142375444	0.188883472532987	LOC100529238/LOC101743127/CHD1/LOC101738562/his2Av/LOC101743239/LOC101744580/LOC101742823/LOC101740470/LOC101745231/LOC101741391/LOC101736557/LOC101738260/LOC101736052/MOF/LOC101747121/LOC101736998/LOC101741204/LOC100101155	19
	CC.GO:1990234	CC	GO:1990234	transferase complex	0.046218487394958	0.0254949823704909	0.00332294997974699	0.20436142375444	0.188883472532987	LOC101745832/LOC101745755/LOC101739047/LOC101743127/LOC101744864/LOC101738475/LOC101737813/LOC101744339/LOC101737159/LOC101745439/Tbp/LOC101745231/LOC101741391/RPA43_N/LOC101747121/LOC101736998/Pka-r2/LOC101737997/LOC101741088/LOC692537/LOC101742619/LOC101740494	22
	CC.GO:0099023	CC	GO:0099023	vesicle tethering complex	0.0105042016806723	0.0037971250339029	0.0259341956485945	0.363891088260184	0.336330659239194	LOC101737710/LOC101746141/LOC101738058/LOC101743825/LOC101738335	5
	CC.GO:0012506	CC	GO:0012506	vesicle membrane	0.0210084033613445	0.010848928668294	0.0270923384675254	0.363891088260184	0.336330659239194	Copg1/LOC101747044/LOC101742404/LOC101739143/LOC101743173/LOC693109/LOC101739513/LOC101736188/LOC101736850/Vta1	10
	CC.GO:0030659	CC	GO:0030659	cytoplasmic vesicle membrane	0.0210084033613445	0.010848928668294	0.0270923384675254	0.363891088260184	0.336330659239194	Copg1/LOC101747044/LOC101742404/LOC101739143/LOC101743173/LOC693109/LOC101739513/LOC101736188/LOC101736850/Vta1	10
	CC.GO:0090575	CC	GO:0090575	RNA polymerase II transcription regulator complex	0.0126050420168067	0.00515324111743965	0.0277561539085269	0.363891088260184	0.336330659239194	LOC101745832/LOC101745755/LOC101744339/LOC101745439/Tbp/LOC101745815	6
	CC.GO:0005654	CC	GO:0005654	nucleoplasm	0.023109243697479	0.0124762679685381	0.0287104583397552	0.363891088260184	0.336330659239194	LOC101745832/LOC101745755/LOC101738475/LOC101744339/Rad23/LOC101745439/Tbp/LOC101736526/LOC101736311/LOC101742163/LOC101742619	11
	CC.GO:0000123	CC	GO:0000123	histone acetyltransferase complex	0.00840336134453781	0.0027122321670735	0.0303948453885508	0.363891088260184	0.336330659239194	LOC101745231/LOC101741391/LOC101747121/LOC101736998	4
	MF.GO:0008270	MF	GO:0008270	zinc ion binding	0.0973282442748092	0.0564614261377464	3.92934340963713e-05	0.0105306403378275	0.00980267776930526	LOC101739885/Ftz-f1/LOC101740699/Lark/LOC101739559/LOC692798/LOC101745004/LOC105841836/LOC732942/USP/LOC101740647/LOC693023/LOC101744961/LOC101736823/LOC692876/LOC101746862/LOC101745249/LOC101741379/LOC101743063/LOC101744339/LOC101738069/Adamts-1/EcR/LOC101744303/LOC105841979/LOC101743046/LOC101740210/LOC100862747/LOC732944/LOC100862757/LOC101735776/LOC101740684/Grf/LOC101743317/LOC100862770/LOC1…	51
	MF.GO:0032559	MF	GO:0032559	adenyl ribonucleotide binding	0.139312977099237	0.0949136042832806	0.000259559119595519	0.0265043946727501	0.0246721977118687	Ubcd4/LOC101746722/Pdk/LOC101737924/LOC693023/CHD1/LOC101742601/MCAK/FRSB/LOC101737313/LOC101737738/LOC101742244/LOC101745443/LOC101738185/DnaJ-2/LOC101746775/CDC2L1/Khc/LOC732871/LOC101736870/LOC101744022/TOP2/LOC101746121/LOC101741322/LOC101738264/LOC101738338/LOC101738887/LOC101745384/LOC101745869/LOC101735515/HSP70/LOC692991/LOC101746484/LOC100862753/LOC101746856/LOC101740061/LOC101735425/LOC…	73
	MF.GO:0030554	MF	GO:0030554	adenyl nucleotide binding	0.146946564885496	0.102458018982721	0.000371338171764051	0.0265043946727501	0.0246721977118687	Ubcd4/LOC101746722/LOC733113/Pdk/LOC101737924/LOC693023/CHD1/LOC101742601/MCAK/FRSB/LOC101737313/LOC101737738/LOC101742244/LOC101745443/LOC101738185/DnaJ-2/LOC101746775/CDC2L1/Khc/LOC732871/LOC101736870/LOC101744022/TOP2/LOC101746121/LOC101741322/LOC101738264/LOC101738338/LOC101738887/LOC101745384/LOC101745869/LOC101735515/HSP70/LOC692991/LOC101746484/LOC100862753/LOC101746856/LOC101740061/LOC101…	77
	MF.GO:0005524	MF	GO:0005524	ATP binding	0.135496183206107	0.0929666585543928	0.0003955879801903	0.0265043946727501	0.0246721977118687	Ubcd4/LOC101746722/Pdk/LOC101737924/LOC693023/CHD1/LOC101742601/MCAK/FRSB/LOC101737313/LOC101737738/LOC101742244/LOC101745443/LOC101738185/DnaJ-2/LOC101746775/CDC2L1/Khc/LOC732871/LOC101736870/LOC101744022/TOP2/LOC101746121/LOC101741322/LOC101738264/LOC101738338/LOC101738887/LOC101745384/LOC101745869/LOC101735515/HSP70/LOC692991/LOC101746484/LOC100862753/LOC101746856/LOC101740061/LOC101735425/LOC…	71
	MF.GO:0140657	MF	GO:0140657	ATP-dependent activity	0.0687022900763359	0.0411292285227549	0.00103130607512876	0.0516432562537644	0.0480732589636378	LOC733031/LOC732966/CHD1/MCAK/LOC732990/LOC101746419/LOC101742516/Khc/LOC732871/LOC101736870/TOP2/LOC101738676/LOC101746121/LOC101741322/LOC101738338/LOC101738887/LOC101745384/HSP70/LOC101746484/LOC101746856/LOC101736557/LOC101737477/LOC101738749/LOC100126867/LOC101740890/LOC101736100/LOC101742699/LOC101738203/LOC100862772/dcr-2/LOC101738315/LOC101746103/LOC101744685/Hsp90/LOC733093/Hsp70	36
	MF.GO:0005543	MF	GO:0005543	phospholipid binding	0.0190839694656489	0.00657094183499635	0.00115619230418876	0.0516432562537644	0.0480732589636378	LOC101739143/LOC101743769/LOC101743448/LOC101742967/Anxb13/LOC101738643/LOC101746218/LOC101746390/LOC101740506/LOC101742411	10
	MF.GO:0043565	MF	GO:0043565	sequence-specific DNA binding	0.0324427480916031	0.0153321976149915	0.00170480886404863	0.0601391404379921	0.0559818392922393	Ftz-f1/LOC101735802/USP/HSFd/LOC101742823/Rel/EcR/Dorsal/BmEts2/E74/Grf/LOC101745620/LOC101738425/LOC101738203/LOC101743421/SGF1/LOC101746416	17
	MF.GO:0019787	MF	GO:0019787	ubiquitin-like protein transferase activity	0.0209923664122137	0.00803115113166221	0.00179519822202961	0.0601391404379921	0.0559818392922393	Ubcd4/LOC101737506/LOC101739047/LOC101745249/LOC100101162/LOC101743046/LOC101741949/LOC101737494/LOC101736311/LOC101738241/LOC101741924	11

## Sheet: 3-GO-L5D6 Yki knockout
		ONTOLOGY	ID	Description	GeneRatio	BgRatio	pvalue	p.adjust	qvalue	geneID	Count
up-regulated	BP.GO:1901566	BP	GO:1901566	organonitrogen compound biosynthetic process	0.273127753303965	0.107798960138648	2.2976550469393e-13	9.16764363728779e-11	8.1264431133853e-11	LOC101738265/LOC101739633/LOC101739864/RpS26/LOC693075/LOC101739592/LOC101736101/eIF3h/RpL35/RpS18/LOC732934/LOC101740455/LOC101745402/RpL19/adk2/LOC692801/AK/LOC733134/LOC692925/Psat1/RpL23A/LOC778504/LOC100101181/RpL18/LOC101745929/LOC733122/LOC692779/RpL21/L(b002)/RpL28/LOC692991/LOC101739135/eIF3i/LOC100101186/RpS8/RpP1/RpL35A/RpL6/eIF3c/RpLP2/LOC101744632/eIF3-S7/RpL29/RpSA/eIF3-S9/RpS24/LOC…	62
	BP.GO:0006518	BP	GO:0006518	peptide metabolic process	0.18942731277533	0.0630849220103986	6.85787147319119e-12	1.11355717926037e-09	9.87086696297281e-10	LOC101739633/RpS26/LOC693075/eIF3h/RpL35/RpS18/RpL19/LOC692977/RpL23A/RpL18/LOC101745929/LOC733122/LOC692779/RpL21/RpL28/LOC692991/LOC101739135/eIF3i/RpS8/RpP1/RpL35A/RpL6/eIF3c/RpLP2/eIF3-S7/RpL29/RpSA/LOC101738101/eIF3-S9/RpS24/LOC101743384/tef2/RpS12/RpS7/RpS20/RpL37/eIF3g/RpS4/RpL26/RpL18A/RpS30/RpS13/LOC101737987	43
	BP.GO:0043604	BP	GO:0043604	amide biosynthetic process	0.18942731277533	0.0634315424610052	8.37261037037872e-12	1.11355717926037e-09	9.87086696297281e-10	LOC101739633/RpS26/LOC693075/eIF3h/RpL35/RpS18/RpL19/LOC733134/RpL23A/RpL18/LOC101745929/LOC733122/LOC692779/RpL21/L(b002)/RpL28/LOC692991/LOC101739135/eIF3i/RpS8/RpP1/RpL35A/RpL6/eIF3c/RpLP2/eIF3-S7/RpL29/RpSA/eIF3-S9/RpS24/LOC101743384/tef2/RpS12/RpS7/RpS20/RpL37/eIF3g/RpS4/RpL26/RpL18A/RpS30/RpS13/LOC101737987	43
	BP.GO:0043603	BP	GO:0043603	amide metabolic process	0.198237885462555	0.0696707105719237	1.52935978192316e-11	1.35641490876006e-09	1.2023622459923e-09	LOC101739633/RpS26/LOC693075/eIF3h/RpL35/RpS18/RpL19/LOC733134/LOC692977/RpL23A/RpL18/LOC101745929/LOC733122/LOC692779/RpL21/L(b002)/RpL28/LOC692991/LOC101739135/eIF3i/RpS8/RpP1/RpL35A/RpL6/eIF3c/RpLP2/eIF3-S7/RpL29/RpSA/LOC101738101/eIF3-S9/RpS24/LOC101743384/tef2/RpS12/RpS7/RpS20/RpL37/eIF3g/RpS4/RpL26/RpL18A/RpS30/RpS13/LOC101737987	45
	BP.GO:0006412	BP	GO:0006412	translation	0.180616740088106	0.0596187175043328	1.6997680560903e-11	1.35641490876006e-09	1.2023622459923e-09	LOC101739633/RpS26/LOC693075/eIF3h/RpL35/RpS18/RpL19/RpL23A/RpL18/LOC101745929/LOC733122/LOC692779/RpL21/RpL28/LOC692991/LOC101739135/eIF3i/RpS8/RpP1/RpL35A/RpL6/eIF3c/RpLP2/eIF3-S7/RpL29/RpSA/eIF3-S9/RpS24/LOC101743384/tef2/RpS12/RpS7/RpS20/RpL37/eIF3g/RpS4/RpL26/RpL18A/RpS30/RpS13/LOC101737987	41
	BP.GO:0043043	BP	GO:0043043	peptide biosynthetic process	0.180616740088106	0.0603119584055459	2.54033491875808e-11	1.68932272097413e-09	1.49746058368898e-09	LOC101739633/RpS26/LOC693075/eIF3h/RpL35/RpS18/RpL19/RpL23A/RpL18/LOC101745929/LOC733122/LOC692779/RpL21/RpL28/LOC692991/LOC101739135/eIF3i/RpS8/RpP1/RpL35A/RpL6/eIF3c/RpLP2/eIF3-S7/RpL29/RpSA/eIF3-S9/RpS24/LOC101743384/tef2/RpS12/RpS7/RpS20/RpL37/eIF3g/RpS4/RpL26/RpL18A/RpS30/RpS13/LOC101737987	41
	BP.GO:0009144	BP	GO:0009144	purine nucleoside triphosphate metabolic process	0.039647577092511	0.0048526863084922	1.40205125469711e-07	6.99273063280182e-06	6.19854238918721e-06	LOC101739864/LOC732934/adk2/LOC692925/LOC100101181/LOC100101186/LOC101744632/LOC778517/LOC778519	9
	BP.GO:0009205	BP	GO:0009205	purine ribonucleoside triphosphate metabolic process	0.039647577092511	0.0048526863084922	1.40205125469711e-07	6.99273063280182e-06	6.19854238918721e-06	LOC101739864/LOC732934/adk2/LOC692925/LOC100101181/LOC100101186/LOC101744632/LOC778517/LOC778519	9
	CC.GO:1990904	CC	GO:1990904	ribonucleoprotein complex	0.179577464788732	0.0585842148087876	4.17245876298741e-14	5.34074721662388e-12	3.64541134029426e-12	RpS26/LOC732955/LOC101742458/eIF3h/RpL35/RpS18/LOC101740588/RpL19/LOC732924/RpL23A/LOC101746688/RpL7Ae/RpL18/LOC101745929/LOC733122/LOC692779/RpL21/RpL28/LOC101736447/RpL7A/LOC101739135/eIF3i/RpL30/RpS8/RpP1/RpP0/RpL35A/RpL6/eIF3c/RpLP2/eIF3-S7/RpL29/RpSA/eIF3-S9/RpS24/RpS12/RpS7/LOC101736232/RpS20/LOC101740781/RpL37/eIF3g/LOC732985/RpS4/RpL26/RpL18A/RpS30/RpS13/Tinp1/LOC101737987/RpS25	51
	CC.GO:0005840	CC	GO:0005840	ribosome	0.126760563380282	0.0385136967724437	4.02547198686634e-11	1.7175347143963e-09	1.17233043828037e-09	RpS26/RpL35/RpS18/LOC101740588/RpL19/LOC692701/RpL23A/RpL7Ae/RpL18/LOC692779/RpS10/RpL21/RpL28/RpL7A/LOC101739135/RpL30/RpS8/RpP1/RpP0/RpL35A/RpL6/RpLP2/RpL29/RpSA/RpS24/RpS12/RpS7/RpS20/RpL37/RpS4/RpL26/RpL18A/RpS30/RpS13/LOC101737987/RpS25	36
	CC.GO:0098796	CC	GO:0098796	membrane protein complex	0.126760563380282	0.0385136967724437	4.02547198686634e-11	1.7175347143963e-09	1.17233043828037e-09	LOC101743287/LOC101739703/LOC692911/LOC101736101/LOC733070/LOC732934/LOC101740455/LOC101745402/Uccr/LOC778510/LOC100134927/LOC692925/LOC101738229/LOC101738548/Atpsyn-beta/LOC692977/LOC100101181/LOC101746113/LOC100101165/LOC101744608/LOC101737762/LOC101744632/LOC101738101/LOC692926/LOC733045/LOC692985/LOC780848/LOC101745480/LOC100134926/Ndufa13/LOC101742176/LOC101736787/COPD/LOC778517/LOC778519/LO…	36
	CC.GO:0098800	CC	GO:0098800	inner mitochondrial membrane protein complex	0.0598591549295775	0.0116625983184161	4.98214843026646e-09	1.59428749768527e-07	1.08820610450557e-07	LOC101743287/LOC732934/Uccr/LOC778510/LOC100134927/LOC692925/LOC101738229/LOC101738548/LOC100101181/LOC101744608/LOC101737762/LOC780848/LOC101745480/LOC100134926/Ndufa13/LOC778517/LOC778519	17
	CC.GO:0045259	CC	GO:0045259	proton-transporting ATP synthase complex	0.0352112676056338	0.00406834825061025	1.34125494384917e-08	3.11183900468236e-07	2.12403484694602e-07	LOC732934/LOC692925/Atpsyn-beta/LOC100101181/LOC100101165/LOC101744632/LOC692926/LOC778517/LOC778519/LOC732965	10
	CC.GO:0070469	CC	GO:0070469	respirasome	0.0633802816901408	0.0138323840520749	1.45867453344486e-08	3.11183900468236e-07	2.12403484694602e-07	LOC101739119/LOC101743287/LOC101738358/LOC100134921/Uccr/LOC778510/LOC100134927/LOC101738229/LOC101738548/LOC101744608/LOC101746922/LOC733018/LOC780848/LOC101745480/LOC100134926/LOC101737774/Ndufa13/LOC101742176	18
	CC.GO:0098798	CC	GO:0098798	mitochondrial protein-containing complex	0.0633802816901408	0.0143748304854896	2.92975586129459e-08	5.35726786065297e-07	3.65668776672859e-07	LOC101743287/LOC732934/Uccr/LOC778510/LOC100134927/LOC692925/LOC101738229/LOC101738548/LOC100101181/LOC101744608/LOC101737762/LOC780848/LOC101745480/LOC100134926/Ndufa13/LOC101736787/LOC778517/LOC778519	18
	CC.GO:0005743	CC	GO:0005743	mitochondrial inner membrane	0.0915492957746479	0.0309194467046379	2.55154374925029e-07	4.08246999880046e-06	2.78655435773387e-06	LOC101739119/LOC101743287/LOC100134921/LOC732934/Uccr/LOC778510/LOC100134927/LOC692925/LOC101738229/LOC101738548/LOC100101181/LOC100127128/LOC101744608/LOC101737762/LOC101746922/LOC733018/LOC693099/LOC780848/LOC101745480/LOC100134926/LOC101746562/LOC101737774/Ndufa13/LOC733114/LOC778517/LOC778519	26
	MF.GO:0008135	MF	GO:0008135	translation factor activity, RNA binding	0.0635451505016722	0.0133852518861037	3.44378551262268e-09	2.75313618297597e-07	2.5646354755249e-07	LOC693075/Ef1beta/eIF3h/EF1a/LOC778479/LOC101745929/LOC733122/LOC732886/eIF3i/eIF3c/eIF3-S7/eIF3-S9/Ef-1g/tef2/LOC733143/LOC732913/eIF3g/Sui1/LOC101740634	19
	MF.GO:0090079	MF	GO:0090079	translation regulator activity, nucleic acid binding	0.0635451505016722	0.0133852518861037	3.44378551262268e-09	2.75313618297597e-07	2.5646354755249e-07	LOC693075/Ef1beta/eIF3h/EF1a/LOC778479/LOC101745929/LOC733122/LOC732886/eIF3i/eIF3c/eIF3-S7/eIF3-S9/Ef-1g/tef2/LOC733143/LOC732913/eIF3g/Sui1/LOC101740634	19
	MF.GO:0003735	MF	GO:0003735	structural constituent of ribosome	0.096989966555184	0.0294475541494281	4.33208868929725e-09	2.75313618297597e-07	2.5646354755249e-07	RpS26/RpL35/RpS18/RpL19/RpL23A/RpL18/LOC692779/RpL21/RpL28/LOC101739135/RpL30/RpS8/RpP1/RpL35A/RpL6/RpLP2/RpL29/RpSA/RpS24/RpS12/RpS7/RpS20/RpL37/RpS4/RpL26/RpL18A/RpS30/RpS13/LOC101737987	29
	MF.GO:0045182	MF	GO:0045182	translation regulator activity	0.0635451505016722	0.0136286201022147	4.8728074034973e-09	2.75313618297597e-07	2.5646354755249e-07	LOC693075/Ef1beta/eIF3h/EF1a/LOC778479/LOC101745929/LOC733122/LOC732886/eIF3i/eIF3c/eIF3-S7/eIF3-S9/Ef-1g/tef2/LOC733143/LOC732913/eIF3g/Sui1/LOC101740634	19
	MF.GO:0003743	MF	GO:0003743	translation initiation factor activity	0.0468227424749164	0.00949136042832806	2.47038959368612e-07	1.11661609634613e-05	1.04016403944679e-05	LOC693075/eIF3h/LOC778479/LOC101745929/LOC733122/LOC732886/eIF3i/eIF3c/eIF3-S7/eIF3-S9/LOC733143/LOC732913/eIF3g/Sui1	14
	MF.GO:0015078	MF	GO:0015078	proton transmembrane transporter activity	0.040133779264214	0.00997809686055001	2.04855609189661e-05	0.000771622794614388	0.000718791611191791	LOC100134921/LOC732934/LOC692925/Atpsyn-beta/LOC100101181/LOC100101165/LOC692926/LOC692985/LOC733114/LOC778517/LOC778519/LOC732965	12
	MF.GO:0003746	MF	GO:0003746	translation elongation factor activity	0.020066889632107	0.00316378680944269	0.000156484728995405	0.00505222125042307	0.00470630763895954	LOC693075/Ef1beta/EF1a/Ef-1g/tef2/LOC101740634	6
	MF.GO:0015252	MF	GO:0015252	proton channel activity	0.0167224080267559	0.00267705037722073	0.000632498116106546	0.0178680717800099	0.0166446872659617	Atpsyn-beta/LOC100101165/LOC692926/LOC733114/LOC732965	5
down-regulated	BP.GO:0035556	BP	GO:0035556	intracellular signal transduction	0.0700389105058366	0.0253032928942808	4.23842821653422e-05	0.0171656342769636	0.0157044919181057	PLCg/LOC101742319/rock1/LOC693109/LOC101739193/Galpha12/Cna/LOC101746458/ask1/LOC101736540/PLCb1/rptor/LOC101741690/LOC101742699/LOC101741506/LOC692901/LOC101743947/LOC101744693	18
	BP.GO:0016310	BP	GO:0016310	phosphorylation	0.116731517509728	0.058578856152513	0.000127857940239991	0.0258912328985981	0.0236873657707772	Pdk/LOC100316860/LOC692855/TOR2/TOR1/rock1/LOC101742601/LOC101737738/Cpkc/Pdxk/LOC101746775/LOC101744022/LOC101744627/ask1/LOC101744568/PKG-I/LOC100862753/LOC101736326/dbt/LOC101745335/LOC101746320/LOC100862655/LOC101739746/Lkb1/CaMKII/LOC100527944/LOC101743583/LOC692899/LOC101740283/LOC101738251	30
	BP.GO:0007264	BP	GO:0007264	small GTPase mediated signal transduction	0.0350194552529183	0.00901213171577123	0.000247356343576669	0.0278536376371553	0.0254827302099511	LOC101742319/rock1/LOC693109/LOC101739193/Galpha12/LOC101736540/LOC692901/LOC101743947/LOC101744693	9
	BP.GO:0007265	BP	GO:0007265	Ras protein signal transduction	0.0233463035019455	0.00415944540727903	0.000275097655675608	0.0278536376371553	0.0254827302099511	rock1/LOC693109/Galpha12/LOC692901/LOC101743947/LOC101744693	6
	BP.GO:0006796	BP	GO:0006796	phosphate-containing compound metabolic process	0.171206225680934	0.107798960138648	0.000824502544303293	0.0667847060885668	0.0610999780199493	PLCg/Pdk/LOC100316860/LOC692855/TOR2/TOR1/rock1/RnrS/LOC101742601/LOC101737738/Cpkc/Pdxk/LOC101738115/LOC101746775/LOC101744022/LOC101744627/ask1/LOC101744568/LOC101736970/LOC101746390/LOC101735515/LOC101740233/LOC101747123/LOC101740712/PKG-I/LOC100862753/AGPAT3/LOC101736326/LOC101746631/dbt/LOC101745335/LOC101746320/LOC100862655/LOC101739746/Lkb1/CaMKII/LOC100527944/LOC101743583/LOC692899/LOC101…	44
	BP.GO:0006793	BP	GO:0006793	phosphorus metabolic process	0.171206225680934	0.109532062391681	0.00116328542440562	0.0686466464998613	0.0628034296762863	PLCg/Pdk/LOC100316860/LOC692855/TOR2/TOR1/rock1/RnrS/LOC101742601/LOC101737738/Cpkc/Pdxk/LOC101738115/LOC101746775/LOC101744022/LOC101744627/ask1/LOC101744568/LOC101736970/LOC101746390/LOC101735515/LOC101740233/LOC101747123/LOC101740712/PKG-I/LOC100862753/AGPAT3/LOC101736326/LOC101746631/dbt/LOC101745335/LOC101746320/LOC100862655/LOC101739746/Lkb1/CaMKII/LOC100527944/LOC101743583/LOC692899/LOC101…	44
	BP.GO:0006468	BP	GO:0006468	protein phosphorylation	0.0817120622568093	0.0405545927209705	0.00118648524814575	0.0686466464998613	0.0628034296762863	LOC100316860/rock1/LOC101742601/LOC101737738/Cpkc/LOC101744627/ask1/LOC101744568/PKG-I/LOC100862753/LOC101736326/dbt/LOC101746320/LOC100862655/LOC101739746/Lkb1/CaMKII/LOC100527944/LOC101743583/LOC101740283/LOC101738251	21
	BP.GO:0043412	BP	GO:0043412	macromolecule modification	0.171206225680934	0.113344887348354	0.00236990464470348	0.119976422638114	0.109764004596793	LOC101741407/LOC101736542/LOC100316860/LOC101743092/rock1/LOC101742601/LOC101737738/Cpkc/LOC101744431/LOC101743894/LOC101744303/LOC100101162/LOC101735634/LOC101743046/LOC101742905/LOC101744627/ask1/LOC101744568/LOC101738068/LOC101740712/PKG-I/LOC100862753/LOC101743548/LOC100862796/LOC101736326/Bm_Bre5/dbt/LOC101739561/Smurf2/MOF/LOC101735969/LOC101746320/LOC100862655/LOC101739746/LOC101741924/Lkb…	44
	CC.GO:0098588	CC	GO:0098588	bounding membrane of organelle	0.059375	0.0322755627881747	0.00611340379639244	0.309088769877007	0.295778727155031	LOC101735897/LOC101737109/LOC101735893/LOC101744145/LOC101746912/LOC101747044/LOC693109/LOC101743258/LOC101739513/LOC101742516/LOC101737843/LOC101739145/VATPc/Bm_Bre5/LOC101743861/LOC733000/LOC692858/LOC733007/LOC101739954	19
	CC.GO:0005819	CC	GO:0005819	spindle	0.0125	0.0027122321670735	0.00766949642260149	0.309088769877007	0.295778727155031	LOC101735329/LOC101736809/LOC101746567/LOC101740668	4
	CC.GO:0005856	CC	GO:0005856	cytoskeleton	0.05625	0.03173311635476	0.0110317724407097	0.309088769877007	0.295778727155031	LOC101741407/LOC101738677/LOC101735329/rock1/LOC101743323/LOC101743258/Khc/LOC101735742/LOC101736809/LOC101746567/LOC693103/LOC101746320/LOC101742699/LOC733028/LOC101735452/LOC101736118/LOC101740668/LOC101745742	18
	CC.GO:0033176	CC	GO:0033176	proton-transporting V-type ATPase complex	0.0125	0.00298345538378085	0.0112395916318912	0.309088769877007	0.295778727155031	LOC732966/LOC101742516/VATPc/LOC692859	4
	CC.GO:0005815	CC	GO:0005815	microtubule organizing center	0.015625	0.00515324111743965	0.0200510276064523	0.38076157313206	0.364365141753168	LOC101735329/LOC101743258/LOC101736809/LOC101746567/LOC101740668	5
	CC.GO:0005794	CC	GO:0005794	Golgi apparatus	0.040625	0.0225115269867101	0.0249950363376434	0.38076157313206	0.364365141753168	LOC101735893/LOC101744145/LOC101737710/LOC101735890/LOC101746238/LOC101739145/LOC101738068/LOC692860/Bm_Bre5/LOC101743861/LOC733000/LOC101738315/LOC101739954	13
	CC.GO:0033177	CC	GO:0033177	proton-transporting two-sector ATPase complex, proton-transporting domain	0.0125	0.0037971250339029	0.0276917507732408	0.38076157313206	0.364365141753168	LOC732966/LOC101742516/VATPc/LOC692859	4
	CC.GO:0099023	CC	GO:0099023	vesicle tethering complex	0.0125	0.0037971250339029	0.0276917507732408	0.38076157313206	0.364365141753168	LOC101737710/LOC692860/LOC101746141/LOC101738058	4
	MF.GO:0032559	MF	GO:0032559	adenyl ribonucleotide binding	0.177325581395349	0.0949136042832806	4.48710092811378e-07	6.06977207799716e-05	5.04955571853754e-05	Ubcd4/Pdk/LOC101743956/LOC100316860/LOC692855/TOR2/TOR1/LOC101737924/LOC693023/rock1/CHD1/LOC101742601/LOC101737738/Cpkc/Pdxk/LOC101735864/LOC101738115/DnaJ-2/LOC101746775/Khc/LOC101736039/LOC101744022/TOP2/LOC101746121/LOC101744627/ask1/LOC101744568/LOC101746706/LOC101737111/LOC101745384/LOC101744798/LOC101735515/LOC101746988/PKG-I/LOC100862753/LOC101736831/LOC101736326/dbt/LOC101745335/LOC10174…	61
	MF.GO:0005524	MF	GO:0005524	ATP binding	0.174418604651163	0.0929666585543928	4.89497748225578e-07	6.06977207799716e-05	5.04955571853754e-05	Ubcd4/Pdk/LOC100316860/LOC692855/TOR2/TOR1/LOC101737924/LOC693023/rock1/CHD1/LOC101742601/LOC101737738/Cpkc/Pdxk/LOC101735864/LOC101738115/DnaJ-2/LOC101746775/Khc/LOC101736039/LOC101744022/TOP2/LOC101746121/LOC101744627/ask1/LOC101744568/LOC101746706/LOC101737111/LOC101745384/LOC101744798/LOC101735515/LOC101746988/PKG-I/LOC100862753/LOC101736831/LOC101736326/dbt/LOC101745335/LOC101741300/LOC10174…	60
	MF.GO:0030554	MF	GO:0030554	adenyl nucleotide binding	0.183139534883721	0.102458018982721	1.4138113208716e-06	0.000116875069192052	9.72305329441521e-05	Ubcd4/Pdk/LOC101743956/LOC100316860/LOC692855/TOR2/TOR1/LOC101737924/LOC693023/rock1/CHD1/LOC101742601/LOC101737738/Cpkc/Pdxk/LOC101735864/LOC101738115/DnaJ-2/LOC101746775/Khc/LOC101736039/LOC101744022/TOP2/LOC101746121/LOC101744627/ask1/LOC101744568/LOC101746706/LOC101737111/LOC101745384/LOC101744798/LOC101735515/LOC101746988/PKG-I/LOC100862753/LOC101736831/LOC101736326/dbt/LOC101745335/LOC10174…	63
	MF.GO:0016773	MF	GO:0016773	phosphotransferase activity, alcohol group as acceptor	0.0813953488372093	0.0348016549038696	1.30950388361406e-05	0.000768308884633844	0.000639170379406763	Pdk/LOC100316860/LOC692855/TOR2/TOR1/rock1/LOC101742601/LOC101737738/Cpkc/Pdxk/LOC101738115/LOC101744627/ask1/LOC101744568/PKG-I/LOC100862753/LOC101736326/dbt/LOC101745335/LOC101746320/LOC100862655/LOC101739746/Lkb1/CaMKII/LOC100527944/LOC101743583/LOC101740283/LOC101738251	28
	MF.GO:0016301	MF	GO:0016301	kinase activity	0.0959302325581395	0.0447797517644196	1.5490098480521e-05	0.000768308884633844	0.000639170379406763	Pdk/LOC100316860/LOC692855/TOR2/TOR1/rock1/LOC101742601/LOC101737738/Cpkc/Pdxk/LOC101738115/LOC101746775/LOC101744022/LOC101744627/ask1/LOC101744568/PKG-I/LOC100862753/LOC101736326/dbt/LOC101745335/LOC101741300/LOC101746320/LOC100862655/LOC101739746/Lkb1/CaMKII/LOC100527944/LOC101743583/LOC692899/LOC101740283/LOC101738251/htra2	33
	MF.GO:0004672	MF	GO:0004672	protein kinase activity	0.0697674418604651	0.0284740812849842	2.48056901393112e-05	0.00102530185909153	0.000852967590755263	Pdk/LOC100316860/TOR2/TOR1/rock1/LOC101742601/LOC101737738/Cpkc/LOC101744627/ask1/LOC101744568/PKG-I/LOC100862753/LOC101736326/dbt/LOC101746320/LOC100862655/LOC101739746/Lkb1/CaMKII/LOC100527944/LOC101743583/LOC101740283/LOC101738251	24
	MF.GO:0016772	MF	GO:0016772	transferase activity, transferring phosphorus-containing groups	0.107558139534884	0.0559746897055245	5.78542711457117e-05	0.00204969417773379	0.00170517851797887	Pdk/LOC100316860/LOC692855/TOR2/TOR1/rock1/LOC101742601/LOC101737738/LOC692837/Cpkc/Pdxk/LOC101738115/LOC101739491/LOC101746775/LOC101746744/LOC101744022/LOC101744627/ask1/LOC101744568/LOC101747123/PKG-I/LOC100862753/LOC101736326/dbt/LOC101745335/LOC101741300/LOC101746320/LOC100862655/LOC101739746/Lkb1/CaMKII/LOC100527944/LOC101743583/LOC692899/LOC101740283/LOC101738251/htra2	37
	MF.GO:0004842	MF	GO:0004842	ubiquitin-protein transferase activity	0.0290697674418605	0.0070576782672183	7.00141584914105e-05	0.00217043891323373	0.00180562829793638	Ubcd4/LOC101737506/LOC101747110/LOC101743894/LOC100101162/LOC101743046/LOC101736311/Smurf2/LOC101740542/LOC101741924	10

## Sheet: 4-KEGG-L5D3 Yki overexpressing
	category	subcategory	ID	Description	GeneRatio	BgRatio	pvalue	p.adjust	qvalue	geneID	Count
up-regulated	Genetic Information Processing	Translation	bmor03010	Ribosome - Bombyx mori (domestic silkworm)	2025-11-24	271/3672	3.04618898607961e-07	5.17852127633534e-06	4.48912061106469e-06	692699/692689/692710/692701/778454/778451/693065/778514/692708/692709/778453	11
	Environmental Information Processing	Signal transduction	bmor04392	Hippo signaling pathway - multiple species - Bombyx mori (domestic silkworm)	2025-02-24	13/3672	0.00305664864322641	0.0259815134674245	0.0225226742132472	101744950/101747103	2
	Genetic Information Processing	Folding, sorting and degradation	bmor04141	Protein processing in endoplasmic reticulum - Bombyx mori (domestic silkworm)	2025-03-24	128/3672	0.0490927839123233	0.216285980394431	0.187492490744398	101736101/692533/692591	3
	Environmental Information Processing	Signal transduction	bmor04391	Hippo signaling pathway - fly - Bombyx mori (domestic silkworm)	2025-02-24	56/3672	0.0508908189163366	0.216285980394431	0.187492490744398	101744950/101747103	2
	Organismal Systems	Aging	bmor04213	Longevity regulating pathway - multiple species - Bombyx mori (domestic silkworm)	2025-02-24	81/3672	0.0970775657910659	0.325032001765734	0.281761487598779	692533/692591	2
	Organismal Systems	Development and regeneration	bmor04320	Dorso-ventral axis formation - Bombyx mori (domestic silkworm)	2025-01-24	22/3672	0.134699394577367	0.325032001765734	0.281761487598779	101735954	1
	Environmental Information Processing	Signaling molecules and interaction	bmor04512	ECM-receptor interaction - Bombyx mori (domestic silkworm)	2025-01-24	24/3672	0.146042827809725	0.325032001765734	0.281761487598779	101746113	1
	Environmental Information Processing	Signal transduction	bmor04341	Hedgehog signaling pathway - fly - Bombyx mori (domestic silkworm)	2025-01-24	31/3672	0.184633189585221	0.325032001765734	0.281761487598779	100270781	1
	Metabolism	Glycan biosynthesis and metabolism	bmor00510	N-Glycan biosynthesis - Bombyx mori (domestic silkworm)	2025-01-24	35/3672	0.205928522028715	0.325032001765734	0.281761487598779	101736101	1
	Genetic Information Processing	Transcription	bmor03022	Basal transcription factors - Bombyx mori (domestic silkworm)	2025-01-24	35/3672	0.205928522028715	0.325032001765734	0.281761487598779	732959	1
	Metabolism	Energy metabolism	bmor00190	Oxidative phosphorylation - Bombyx mori (domestic silkworm)	2025-02-24	131/3672	0.210314824671946	0.325032001765734	0.281761487598779	732934/778519	2
	Metabolism	Glycan biosynthesis and metabolism	bmor00513	Various types of N-glycan biosynthesis - Bombyx mori (domestic silkworm)	2025-01-24	44/3672	0.251911563730627	0.348714339137736	0.302291067983177	101736101	1
	Environmental Information Processing	Signal transduction	bmor04350	TGF-beta signaling pathway - Bombyx mori (domestic silkworm)	2025-01-24	47/3672	0.266663906399445	0.348714339137736	0.302291067983177	100270781	1
	Genetic Information Processing	Folding, sorting and degradation	bmor03018	RNA degradation - Bombyx mori (domestic silkworm)	2025-01-24	56/3672	0.309266905482357	0.375538385228576	0.32554411103406	101744020	1
	Cellular Processes	Transport and catabolism	bmor04148	Efferocytosis - Bombyx mori (domestic silkworm)	2025-01-24	69/3672	0.366640473968345	0.398492003257729	0.345441984248186	100415789	1
	NA	NA	bmor04820	Cytoskeleton in muscle cells - Bombyx mori (domestic silkworm)	2025-01-24	71/3672	0.375051297183745	0.398492003257729	0.345441984248186	101746113	1
	Environmental Information Processing	Signal transduction	bmor04013	MAPK signaling pathway - fly - Bombyx mori (domestic silkworm)	2025-01-24	78/3672	0.403654304594627	0.403654304594627	0.349917044230637	100270781	1
down-regulated	Genetic Information Processing	Folding, sorting and degradation	bmor04120	Ubiquitin mediated proteolysis - Bombyx mori (domestic silkworm)	16/268	90/3672	0.000641114382357248	0.0371486872698245	0.0352287219249166	101741122/101742898/101743201/101736244/100862757/101742453/101746780/101740454/101739884/101742698/101745295/101738440/101741088/100529214/100852386/101745791	16
	Genetic Information Processing	Transcription	bmor03022	Basal transcription factors - Bombyx mori (domestic silkworm)	9/268	35/3672	0.000669345716573415	0.0371486872698245	0.0352287219249166	101745832/101735666/101746127/101737741/101745439/101741347/101741862/101742930/101736484	9
	Genetic Information Processing	Translation	bmor00970	Aminoacyl-tRNA biosynthesis - Bombyx mori (domestic silkworm)	9/268	39/3672	0.00155073733162583	0.0573772812701555	0.0544118361973974	101737924/693023/101739579/692991/101737306/101740690/101742308/101741861/101740812	9
	Genetic Information Processing	Replication and repair	bmor03460	Fanconi anemia pathway - Bombyx mori (domestic silkworm)	8/268	34/3672	0.00247285827061483	0.0686218170095616	0.0650752176477587	101737985/101743797/101741322/101742198/101744626/101740307/693041/101740968	8
	Cellular Processes	Transport and catabolism	bmor04144	Endocytosis - Bombyx mori (domestic silkworm)	17/268	117/3672	0.00431712877127562	0.0958402587223189	0.0908869215005395	101742319/101743173/101743746/100313493/101739513/101742311/100144600/101737965/101737168/101739687/101744291/100862757/732988/101741967/732946/101736916/732877	17
	Genetic Information Processing	Folding, sorting and degradation	bmor04130	SNARE interactions in vesicular transport - Bombyx mori (domestic silkworm)	5/268	21/3672	0.0153816530733204	0.284560581856428	0.269853562689832	732925/101741305/732950/101738668/101736850	5
	Genetic Information Processing	Translation	bmor03015	mRNA surveillance pathway - Bombyx mori (domestic silkworm)	10/268	70/3672	0.0289611766814301	0.404162836780519	0.383274382911825	692918/101741929/693102/101736857/733049/732920/101742768/101743604/101735812/101742144	10
	Genetic Information Processing	Translation	bmor03013	Nucleocytoplasmic transport - Bombyx mori (domestic silkworm)	11/268	80/3672	0.0291288531012987	0.404162836780519	0.383274382911825	101741929/101742253/101741777/693102/101736857/733049/101743265/101735812/101743073/101742144/101737307	11
	Genetic Information Processing	Replication and repair	bmor03430	Mismatch repair - Bombyx mori (domestic silkworm)	4/268	18/3672	0.0375816413913174	0.463506910492915	0.439551361301958	101742226/101741322/101736557/101740968	4
	Metabolism	Global and overview maps	bmor01250	Biosynthesis of nucleotide sugars - Bombyx mori (domestic silkworm)	5/268	27/3672	0.0427044109643336	0.474018961704103	0.449520115414038	101745110/101746744/101740507/101737280/101746316	5
	Genetic Information Processing	Folding, sorting and degradation	bmor03060	Protein export - Bombyx mori (domestic silkworm)	5/268	28/3672	0.0490082958720044	0.494538258344772	0.468978907866071	692928/101746557/101736319/733068/778481	5
	Genetic Information Processing	Replication and repair	bmor03410	Base excision repair - Bombyx mori (domestic silkworm)	5/268	30/3672	0.063176106169641	0.526638333370456	0.499419946297255	101742226/101739679/101736557/101740063/692827	5
	Metabolism	Amino acid metabolism	bmor00330	Arginine and proline metabolism - Bombyx mori (domestic silkworm)	5/268	31/3672	0.0710381152830157	0.526638333370456	0.499419946297255	101738901/101745536/101735616/101742094/101741966	5
	Environmental Information Processing	Signal transduction	bmor04341	Hedgehog signaling pathway - fly - Bombyx mori (domestic silkworm)	5/268	31/3672	0.0710381152830157	0.526638333370456	0.499419946297255	101737144/101745828/101745289/692728/101746466	5
	Genetic Information Processing	Replication and repair	bmor03420	Nucleotide excision repair - Bombyx mori (domestic silkworm)	7/268	51/3672	0.0746309912873926	0.526638333370456	0.499419946297255	101746067/101739752/101742226/101743797/101742198/101736557/101744152	7
	Metabolism	Lipid metabolism	bmor00564	Glycerophospholipid metabolism - Bombyx mori (domestic silkworm)	9/268	72/3672	0.0761522521466379	0.526638333370456	0.499419946297255	101743990/692517/101745087/101741049/101746631/101745999/101740252/101739124/101745230	9
	Genetic Information Processing	Folding, sorting and degradation	bmor04141	Protein processing in endoplasmic reticulum - Bombyx mori (domestic silkworm)	14/268	128/3672	0.0806563213270067	0.526638333370456	0.499419946297255	101746534/101745731/732862/101746261/101746557/778461/100302620/101746780/101737157/101745295/733068/101741763/101738119/100852386	14
	Genetic Information Processing	Replication and repair	bmor03030	DNA replication - Bombyx mori (domestic silkworm)	5/268	34/3672	0.097666484859303	0.597897201577143	0.566995923733659	101742226/101746695/101736756/101738648/101736557	5
	Environmental Information Processing	Signal transduction	bmor04330	Notch signaling pathway - Bombyx mori (domestic silkworm)	4/268	25/3672	0.10454979322577	0.597897201577143	0.566995923733659	101736421/101746037/101742356/101744564	4
	Cellular Processes	Transport and catabolism	bmor04140	Autophagy - animal - Bombyx mori (domestic silkworm)	12/268	111/3672	0.107729225509395	0.597897201577143	0.566995923733659	100379191/101744668/101740181/100862757/101736697/101738668/101735550/101736850/101742698/101741647/732877/100216350	12
	Metabolism	Carbohydrate metabolism	bmor00520	Amino sugar and nucleotide sugar metabolism - Bombyx mori (domestic silkworm)	5/268	36/3672	0.117845388132612	0.617416827614988	0.585506711820756	101745110/101746744/101740507/101737280/101746316	5
	Cellular Processes	Cell growth and death	bmor04215	Apoptosis - multiple species - Bombyx mori (domestic silkworm)	3/268	17/3672	0.122370902770538	0.617416827614988	0.585506711820756	100141428/100529236/100529214	3
	Organismal Systems	Immune system	bmor04620	Toll-like receptor signaling pathway - Bombyx mori (domestic silkworm)	4/268	29/3672	0.157174763614549	0.758539076574565	0.719335302583751	101746674/100141428/100862757/100529236	4
	Genetic Information Processing	Transcription	bmor03020	RNA polymerase - Bombyx mori (domestic silkworm)	4/268	30/3672	0.171636095529151	0.793816941822323	0.752789892671715	101746067/101737159/100379192/101744152	4
	Genetic Information Processing	Replication and repair	bmor03440	Homologous recombination - Bombyx mori (domestic silkworm)	4/268	31/3672	0.18653950001006	0.828235380044666	0.785429473726568	101742226/101744626/101740057/693041	4
	Organismal Systems	Environmental adaptation	bmor04711	Circadian rhythm - fly - Bombyx mori (domestic silkworm)	2/268	12/3672	0.216609081470856	0.924754155510192	0.876959844011562	692522/692728	2
	Genetic Information Processing	Chromosome	bmor03082	ATP-dependent chromatin remodeling - Bombyx mori (domestic silkworm)	7/268	68/3672	0.22499433175511	0.924976697215453	0.877170884035517	101741028/101738766/101740978/101737615/101743098/101739754/100529122	7
	Metabolism	Glycan biosynthesis and metabolism	bmor00563	Glycosylphosphatidylinositol (GPI)-anchor biosynthesis - Bombyx mori (domestic silkworm)	3/268	23/3672	0.233401134507408	0.925268783225794	0.877447874087998	101742462/101737110/101737839	3
	Metabolism	Glycan biosynthesis and metabolism	bmor00534	Glycosaminoglycan biosynthesis - heparan sulfate / heparin - Bombyx mori (domestic silkworm)	2/268	14/3672	0.272354849486823	0.999998779956959	0.948315580803185	101739145/101743406	2
	Metabolism	Amino acid metabolism	bmor00260	Glycine, serine and threonine metabolism - Bombyx mori (domestic silkworm)	4/268	37/3672	0.282903003054586	0.999998779956959	0.948315580803185	101744557/692964/101735616/101736114	4
	Metabolism	Metabolism of cofactors and vitamins	bmor00670	One carbon pool by folate - Bombyx mori (domestic silkworm)	3/268	26/3672	0.294252936704366	0.999998779956959	0.948315580803185	101735616/101747054/692944	3
	Metabolism	Amino acid metabolism	bmor00270	Cysteine and methionine metabolism - Bombyx mori (domestic silkworm)	4/268	38/3672	0.299735830971966	0.999998779956959	0.948315580803185	692964/733082/101742094/692944	4
	Metabolism	Amino acid metabolism	bmor00310	Lysine degradation - Bombyx mori (domestic silkworm)	4/268	39/3672	0.316683798132118	0.999998779956959	0.948315580803185	101747228/101735616/101735557/101738260	4
	Genetic Information Processing	Information processing in viruses	bmor03250	Viral life cycle - HIV-1 - Bombyx mori (domestic silkworm)	3/268	28/3672	0.335411385122319	0.999998779956959	0.948315580803185	101737028/100313493/101743185	3
	Cellular Processes	Transport and catabolism	bmor04142	Lysosome - Bombyx mori (domestic silkworm)	10/268	119/3672	0.368647049119181	0.999998779956959	0.948315580803185	105842703/101742516/693101/101737544/101741653/101737012/101740461/101743409/101741915/101735961	10
	Metabolism	Glycan biosynthesis and metabolism	bmor00531	Glycosaminoglycan degradation - Bombyx mori (domestic silkworm)	2/268	18/3672	0.3823886480283	0.999998779956959	0.948315580803185	100141461/101737544	2
	Genetic Information Processing	Folding, sorting and degradation	bmor03018	RNA degradation - Bombyx mori (domestic silkworm)	5/268	56/3672	0.388767419519151	0.999998779956959	0.948315580803185	100384888/101745129/101743557/101742881/101744510	5
	NA	NA	bmor03272	Virion - Hepatitis viruses - Bombyx mori (domestic silkworm)	3/268	32/3672	0.416976825837353	0.999998779956959	0.948315580803185	101740730/100313493/693101	3
	Metabolism	Glycan biosynthesis and metabolism	bmor00514	Other types of O-glycan biosynthesis - Bombyx mori (domestic silkworm)	2/268	21/3672	0.460175936262804	0.999998779956959	0.948315580803185	101746748/692681	2
	Metabolism	Glycan biosynthesis and metabolism	bmor00510	N-Glycan biosynthesis - Bombyx mori (domestic silkworm)	3/268	35/3672	0.476006180777649	0.999998779956959	0.948315580803185	101746534/101740964/101738398	3
	Cellular Processes	Transport and catabolism	bmor04136	Autophagy - other - Bombyx mori (domestic silkworm)	2/268	23/3672	0.508775361265197	0.999998779956959	0.948315580803185	101744668/100216350	2
	Genetic Information Processing	Chromosome	bmor03083	Polycomb repressive complex - Bombyx mori (domestic silkworm)	3/268	38/3672	0.532146822141746	0.999998779956959	0.948315580803185	100529121/101737127/100529122	3
	Organismal Systems	Immune system	bmor04624	Toll and Imd signaling pathway - Bombyx mori (domestic silkworm)	5/268	67/3672	0.547459271237936	0.999998779956959	0.948315580803185	692372/101746674/100141428/100529236/100529214	5
	Genetic Information Processing	Folding, sorting and degradation	bmor03050	Proteasome - Bombyx mori (domestic silkworm)	3/268	39/3672	0.550102074142548	0.999998779956959	0.948315580803185	101746211/101735320/778515	3
	Organismal Systems	Digestive system	bmor04977	Vitamin digestion and absorption - Bombyx mori (domestic silkworm)	2/268	25/3672	0.554436789067446	0.999998779956959	0.948315580803185	101740730/101737889	2
	Metabolism	Amino acid metabolism	bmor00340	Histidine metabolism - Bombyx mori (domestic silkworm)	1/268	11/3672	0.566047185242064	0.999998779956959	0.948315580803185	101735616	1
	Metabolism	Metabolism of terpenoids and polyketides	bmor00900	Terpenoid backbone biosynthesis - Bombyx mori (domestic silkworm)	2/268	26/3672	0.576118776764369	0.999998779956959	0.948315580803185	692501/101738415	2
	Metabolism	Carbohydrate metabolism	bmor00640	Propanoate metabolism - Bombyx mori (domestic silkworm)	2/268	27/3672	0.597022924639362	0.999998779956959	0.948315580803185	101746722/101744373	2
	Environmental Information Processing	Signal transduction	bmor04392	Hippo signaling pathway - multiple species - Bombyx mori (domestic silkworm)	1/268	13/3672	0.627263949919122	0.999998779956959	0.948315580803185	692728	1
	Metabolism	Global and overview maps	bmor01232	Nucleotide metabolism - Bombyx mori (domestic silkworm)	4/268	59/3672	0.634704783709715	0.999998779956959	0.948315580803185	101739864/693084/101740233/101738667	4
	Metabolism	Amino acid metabolism	bmor00250	Alanine, aspartate and glutamate metabolism - Bombyx mori (domestic silkworm)	2/268	30/3672	0.655066603565331	0.999998779956959	0.948315580803185	101746741/101741966	2
	Metabolism	Carbohydrate metabolism	bmor00010	Glycolysis / Gluconeogenesis - Bombyx mori (domestic silkworm)	3/268	46/3672	0.663691115799855	0.999998779956959	0.948315580803185	101746722/101735616/101739930	3
	Cellular Processes	Cell growth and death	bmor04214	Apoptosis - fly - Bombyx mori (domestic silkworm)	3/268	46/3672	0.663691115799855	0.999998779956959	0.948315580803185	101735759/100141428/100862757	3
	Environmental Information Processing	Signal transduction	bmor04068	FoxO signaling pathway - Bombyx mori (domestic silkworm)	5/268	78/3672	0.683851298394315	0.999998779956959	0.948315580803185	101744333/101737550/101737015/100126177/692728	5
	Metabolism	Metabolism of cofactors and vitamins	bmor00760	Nicotinate and nicotinamide metabolism - Bombyx mori (domestic silkworm)	1/268	16/3672	0.703332901224982	0.999998779956959	0.948315580803185	692483	1
	Metabolism	Amino acid metabolism	bmor00380	Tryptophan metabolism - Bombyx mori (domestic silkworm)	2/268	33/3672	0.706261044957395	0.999998779956959	0.948315580803185	101747228/101735616	2
	Metabolism	Nucleotide metabolism	bmor00240	Pyrimidine metabolism - Bombyx mori (domestic silkworm)	2/268	34/3672	0.721864129483825	0.999998779956959	0.948315580803185	101739864/101738667	2
	Metabolism	Lipid metabolism	bmor00061	Fatty acid biosynthesis - Bombyx mori (domestic silkworm)	1/268	17/3672	0.72507983297326	0.999998779956959	0.948315580803185	101742305	1
	Metabolism	Glycan biosynthesis and metabolism	bmor00541	Biosynthesis of various nucleotide sugars - Bombyx mori (domestic silkworm)	1/268	17/3672	0.72507983297326	0.999998779956959	0.948315580803185	101746744	1
	Metabolism	Carbohydrate metabolism	bmor00020	Citrate cycle (TCA cycle) - Bombyx mori (domestic silkworm)	2/268	36/3672	0.750981510559395	0.999998779956959	0.948315580803185	101744373/101746165	2
	Metabolism	Lipid metabolism	bmor00071	Fatty acid degradation - Bombyx mori (domestic silkworm)	2/268	36/3672	0.750981510559395	0.999998779956959	0.948315580803185	101747228/101735616	2
	NA	NA	bmor04981	Folate transport and metabolism - Bombyx mori (domestic silkworm)	1/268	19/3672	0.763923463373425	0.999998779956959	0.948315580803185	692944	1
	Metabolism	Metabolism of other amino acids	bmor00480	Glutathione metabolism - Bombyx mori (domestic silkworm)	3/268	55/3672	0.777160403716867	0.999998779956959	0.948315580803185	101746394/101738819/101742094	3
	Human Diseases	Infectious disease: bacterial	bmor05100	Bacterial invasion of epithelial cells - Bombyx mori (domestic silkworm)	2/268	38/3672	0.77744526488955	0.999998779956959	0.948315580803185	101742319/732988	2
	Metabolism	Lipid metabolism	bmor00590	Arachidonic acid metabolism - Bombyx mori (domestic silkworm)	3/268	56/3672	0.787595418248782	0.999998779956959	0.948315580803185	101738819/101746631/101742192	3
	Metabolism	Lipid metabolism	bmor00600	Sphingolipid metabolism - Bombyx mori (domestic silkworm)	2/268	39/3672	0.789734086011009	0.999998779956959	0.948315580803185	101743119/101739124	2
	Metabolism	Carbohydrate metabolism	bmor00620	Pyruvate metabolism - Bombyx mori (domestic silkworm)	2/268	39/3672	0.789734086011009	0.999998779956959	0.948315580803185	101746722/101735616	2
	Environmental Information Processing	Signal transduction	bmor04150	mTOR signaling pathway - Bombyx mori (domestic silkworm)	6/268	107/3672	0.805086903988552	0.999998779956959	0.948315580803185	101740238/101742902/100379191/101742661/101741932/101741071	6
	Metabolism	Carbohydrate metabolism	bmor00051	Fructose and mannose metabolism - Bombyx mori (domestic silkworm)	1/268	22/3672	0.812175787619733	0.999998779956959	0.948315580803185	101737280	1
	Metabolism	Carbohydrate metabolism	bmor00052	Galactose metabolism - Bombyx mori (domestic silkworm)	1/268	22/3672	0.812175787619733	0.999998779956959	0.948315580803185	101746316	1
	Metabolism	Lipid metabolism	bmor00592	alpha-Linolenic acid metabolism - Bombyx mori (domestic silkworm)	1/268	22/3672	0.812175787619733	0.999998779956959	0.948315580803185	101746631	1
	Cellular Processes	Transport and catabolism	bmor04146	Peroxisome - Bombyx mori (domestic silkworm)	6/268	109/3672	0.819065537993062	0.999998779956959	0.948315580803185	101742645/101736242/101737343/101746741/101746999/101743280	6
	Cellular Processes	Transport and catabolism	bmor04145	Phagosome - Bombyx mori (domestic silkworm)	4/268	77/3672	0.824963101155376	0.999998779956959	0.948315580803185	101740730/101742516/733068/101741915	4
	Environmental Information Processing	Signal transduction	bmor04310	Wnt signaling pathway - Bombyx mori (domestic silkworm)	4/268	77/3672	0.824963101155376	0.999998779956959	0.948315580803185	101740238/101737550/692577/692728	4
	Metabolism	Carbohydrate metabolism	bmor00562	Inositol phosphate metabolism - Bombyx mori (domestic silkworm)	2/268	43/3672	0.83310642235017	0.999998779956959	0.948315580803185	101739930/101744751	2
	Metabolism	Glycan biosynthesis and metabolism	bmor00511	Other glycan degradation - Bombyx mori (domestic silkworm)	1/268	26/3672	0.861573919656596	0.999998779956959	0.948315580803185	101746737	1
	Metabolism	Carbohydrate metabolism	bmor00030	Pentose phosphate pathway - Bombyx mori (domestic silkworm)	1/268	27/3672	0.87174895792649	0.999998779956959	0.948315580803185	101746394	1
	Metabolism	Metabolism of cofactors and vitamins	bmor00130	Ubiquinone and other terpenoid-quinone biosynthesis - Bombyx mori (domestic silkworm)	1/268	27/3672	0.87174895792649	0.999998779956959	0.948315580803185	101747145	1
	Metabolism	Global and overview maps	bmor01200	Carbon metabolism - Bombyx mori (domestic silkworm)	6/268	119/3672	0.877468636708881	0.999998779956959	0.948315580803185	101746722/101746394/101744557/692964/101744373/101746165	6
	Metabolism	Metabolism of cofactors and vitamins	bmor00790	Folate biosynthesis - Bombyx mori (domestic silkworm)	1/268	28/3672	0.881178664174967	0.999998779956959	0.948315580803185	101742526	1
	Metabolism	Lipid metabolism	bmor00561	Glycerolipid metabolism - Bombyx mori (domestic silkworm)	2/268	49/3672	0.883170821545276	0.999998779956959	0.948315580803185	101735616/101745230	2
	Metabolism	Global and overview maps	bmor01230	Biosynthesis of amino acids - Bombyx mori (domestic silkworm)	3/268	69/3672	0.889902974912994	0.999998779956959	0.948315580803185	101745536/101744557/692964	3
	Genetic Information Processing	Translation	bmor03008	Ribosome biogenesis in eukaryotes - Bombyx mori (domestic silkworm)	10/268	188/3672	0.892139993202161	0.999998779956959	0.948315580803185	101736857/101742366/101745950/101738143/101739095/101746130/101746348/101740296/101737534/101745671	10
	Metabolism	Lipid metabolism	bmor01040	Biosynthesis of unsaturated fatty acids - Bombyx mori (domestic silkworm)	2/268	51/3672	0.896511610894856	0.999998779956959	0.948315580803185	101736567/101744618	2
	Metabolism	Carbohydrate metabolism	bmor00053	Ascorbate and aldarate metabolism - Bombyx mori (domestic silkworm)	2/268	52/3672	0.902638905291675	0.999998779956959	0.948315580803185	101735616/100174975	2
	Metabolism	Lipid metabolism	bmor00565	Ether lipid metabolism - Bombyx mori (domestic silkworm)	1/268	31/3672	0.905520357147565	0.999998779956959	0.948315580803185	101746631	1
	Metabolism	Lipid metabolism	bmor00062	Fatty acid elongation - Bombyx mori (domestic silkworm)	1/268	32/3672	0.912474640115006	0.999998779956959	0.948315580803185	101744618	1
	Metabolism	Metabolism of other amino acids	bmor00410	beta-Alanine metabolism - Bombyx mori (domestic silkworm)	1/268	33/3672	0.918918814963682	0.999998779956959	0.948315580803185	101735616	1
	Metabolism	Metabolism of cofactors and vitamins	bmor00830	Retinol metabolism - Bombyx mori (domestic silkworm)	2/268	55/3672	0.919053063724143	0.999998779956959	0.948315580803185	101741725/100174975	2
	Cellular Processes	Transport and catabolism	bmor04137	Mitophagy - animal - Bombyx mori (domestic silkworm)	2/268	56/3672	0.923921865408416	0.999998779956959	0.948315580803185	101737157/101742698	2
	Environmental Information Processing	Signal transduction	bmor04391	Hippo signaling pathway - fly - Bombyx mori (domestic silkworm)	2/268	56/3672	0.923921865408416	0.999998779956959	0.948315580803185	692728/101747095	2
	Genetic Information Processing	Transcription	bmor03040	Spliceosome - Bombyx mori (domestic silkworm)	10/268	201/3672	0.931944399278826	0.999998779956959	0.948315580803185	101740129/101743775/101739416/101743469/101740068/101735663/733049/101737477/101742693/101742271	10
	Metabolism	Global and overview maps	bmor01240	Biosynthesis of cofactors - Bombyx mori (domestic silkworm)	7/268	155/3672	0.944059882757732	0.999998779956959	0.948315580803185	101739864/692964/101741725/101737280/101736382/101747145/100174975	7
	Metabolism	Amino acid metabolism	bmor00280	Valine, leucine and isoleucine degradation - Bombyx mori (domestic silkworm)	1/268	40/3672	0.952558602982882	0.999998779956959	0.948315580803185	101735616	1
	Metabolism	Carbohydrate metabolism	bmor00630	Glyoxylate and dicarboxylate metabolism - Bombyx mori (domestic silkworm)	1/268	40/3672	0.952558602982882	0.999998779956959	0.948315580803185	101746722	1
	Environmental Information Processing	Membrane transport	bmor02010	ABC transporters - Bombyx mori (domestic silkworm)	1/268	40/3672	0.952558602982882	0.999998779956959	0.948315580803185	101741923	1
	Metabolism	Global and overview maps	bmor01212	Fatty acid metabolism - Bombyx mori (domestic silkworm)	3/268	85/3672	0.954250076935707	0.999998779956959	0.948315580803185	101736567/101742305/101744618	3
	Metabolism	Glycan biosynthesis and metabolism	bmor00513	Various types of N-glycan biosynthesis - Bombyx mori (domestic silkworm)	1/268	44/3672	0.965090722275453	0.999998779956959	0.948315580803185	101746534	1
	Metabolism	Xenobiotics biodegradation and metabolism	bmor00983	Drug metabolism - other enzymes - Bombyx mori (domestic silkworm)	3/268	91/3672	0.967598083407772	0.999998779956959	0.948315580803185	101739864/101740233/100174975	3
	Metabolism	Nucleotide metabolism	bmor00230	Purine metabolism - Bombyx mori (domestic silkworm)	3/268	94/3672	0.972806671066367	0.999998779956959	0.948315580803185	101739864/693084/101740233	3
	Organismal Systems	Aging	bmor04213	Longevity regulating pathway - multiple species - Bombyx mori (domestic silkworm)	2/268	81/3672	0.984856171273679	0.999998779956959	0.948315580803185	101744333/100126177	2
	Metabolism	Metabolism of cofactors and vitamins	bmor00860	Porphyrin metabolism - Bombyx mori (domestic silkworm)	1/268	55/3672	0.985009826615582	0.999998779956959	0.948315580803185	100174975	1
	Cellular Processes	Cell motility	bmor04814	Motor proteins - Bombyx mori (domestic silkworm)	3/268	106/3672	0.986730028255822	0.999998779956959	0.948315580803185	101741495/100144600/101743227	3
	Metabolism	Carbohydrate metabolism	bmor00040	Pentose and glucuronate interconversions - Bombyx mori (domestic silkworm)	1/268	57/3672	0.987149195329419	0.999998779956959	0.948315580803185	100174975	1
	Metabolism	Xenobiotics biodegradation and metabolism	bmor00982	Drug metabolism - cytochrome P450 - Bombyx mori (domestic silkworm)	1/268	62/3672	0.991258799188086	0.999998779956959	0.948315580803185	100174975	1
	Metabolism	Xenobiotics biodegradation and metabolism	bmor00980	Metabolism of xenobiotics by cytochrome P450 - Bombyx mori (domestic silkworm)	1/268	67/3672	0.994057478532832	0.999998779956959	0.948315580803185	100174975	1
	Cellular Processes	Transport and catabolism	bmor04148	Efferocytosis - Bombyx mori (domestic silkworm)	1/268	69/3672	0.994908298251019	0.999998779956959	0.948315580803185	692871	1
	Metabolism	Energy metabolism	bmor00190	Oxidative phosphorylation - Bombyx mori (domestic silkworm)	3/268	131/3672	0.997226158203695	0.999998779956959	0.948315580803185	101742516/101741915/101746165	3
	Environmental Information Processing	Signal transduction	bmor04013	MAPK signaling pathway - fly - Bombyx mori (domestic silkworm)	1/268	78/3672	0.997462547842867	0.999998779956959	0.948315580803185	100862757	1
	Environmental Information Processing	Signaling molecules and interaction	bmor04080	Neuroactive ligand-receptor interaction - Bombyx mori (domestic silkworm)	1/268	93/3672	0.999208346375381	0.999998779956959	0.948315580803185	692962	1
	Genetic Information Processing	Translation	bmor03010	Ribosome - Bombyx mori (domestic silkworm)	4/268	271/3672	0.999998779956959	0.999998779956959	0.948315580803185	692667/101745964/101739965/101744358	4

## Sheet: 5-KEGG-L5D6 Yki overexpressing
	category	subcategory	ID	Description	GeneRatio	BgRatio	pvalue	p.adjust	qvalue	geneID	Count
up-regulated	Genetic Information Processing	Translation	bmor03010	Ribosome - Bombyx mori (domestic silkworm)	43/188	271/3672	3.88121156016781e-12	3.95883579137116e-10	3.95883579137116e-10	692699/692689/692710/692706/692670/692724/692703/692701/692654/732857/692694/778454/692779/101738983/778452/693067/693058/692712/692662/692557/692705/692717/778451/692692/693118/693065/692698/101737395/692721/692666/732856/778514/692719/692708/692841/692709/692714/692702/692726/778453/101737987/692723/692653	43
	Metabolism	Energy metabolism	bmor00190	Oxidative phosphorylation - Bombyx mori (domestic silkworm)	22/188	131/3672	4.66739954937658e-07	2.38037377018206e-05	2.38037377018206e-05	101738358/101741774/732934/751613/692925/101738229/101738548/101740204/100101165/101745824/101737782/101736448/101744632/780848/100134926/101746562/101741007/733114/101742176/101746156/778517/778519	22
	Genetic Information Processing	Folding, sorting and degradation	bmor03060	Protein export - Bombyx mori (domestic silkworm)	7/188	28/3672	0.000389773248573704	0.0132522904515059	0.0132522904515059	733070/692906/732924/692977/733141/778464/101738101	7
	Metabolism	Metabolism of cofactors and vitamins	bmor00785	Lipoic acid metabolism - Bombyx mori (domestic silkworm)	3/188	19/3672	0.0699474284728945	0.98414230401902	0.98414230401902	733134/101735920/100101211	3
	Metabolism	Carbohydrate metabolism	bmor00010	Glycolysis / Gluconeogenesis - Bombyx mori (domestic silkworm)	5/188	46/3672	0.0837454733626382	0.98414230401902	0.98414230401902	100124423/692786/733134/100101211/732915	5
	Metabolism	Global and overview maps	bmor01240	Biosynthesis of cofactors - Bombyx mori (domestic silkworm)	12/188	155/3672	0.0969926002240099	0.98414230401902	0.98414230401902	100329147/692791/101735934/101735920/100101186/101745043/101745817/100862843/101740272/100174975/101746962/100862845	12
	Metabolism	Carbohydrate metabolism	bmor00020	Citrate cycle (TCA cycle) - Bombyx mori (domestic silkworm)	4/188	36/3672	0.109646883631602	0.98414230401902	0.98414230401902	733134/100101211/101744897/101742176	4
	Metabolism	Lipid metabolism	bmor00071	Fatty acid degradation - Bombyx mori (domestic silkworm)	4/188	36/3672	0.109646883631602	0.98414230401902	0.98414230401902	101738882/101735662/100500748/105841738	4
	Metabolism	Carbohydrate metabolism	bmor00620	Pyruvate metabolism - Bombyx mori (domestic silkworm)	4/188	39/3672	0.136417639412162	0.98414230401902	0.98414230401902	100124423/733134/100101211/101744897	4
	Environmental Information Processing	Signal transduction	bmor04392	Hippo signaling pathway - multiple species - Bombyx mori (domestic silkworm)	2/188	13/3672	0.140530154936018	0.98414230401902	0.98414230401902	100144579/101747103	2
	Genetic Information Processing	Information processing in viruses	bmor03250	Viral life cycle - HIV-1 - Bombyx mori (domestic silkworm)	3/188	28/3672	0.170310311446996	0.98414230401902	0.98414230401902	692898/692970/692448	3
	Metabolism	Metabolism of cofactors and vitamins	bmor00730	Thiamine metabolism - Bombyx mori (domestic silkworm)	2/188	15/3672	0.177224514395118	0.98414230401902	0.98414230401902	100329147/692857	2
	Metabolism	Xenobiotics biodegradation and metabolism	bmor00983	Drug metabolism - other enzymes - Bombyx mori (domestic silkworm)	7/188	91/3672	0.182634997721641	0.98414230401902	0.98414230401902	101744452/692678/100101186/101746194/100862843/100174975/100862845	7
	Metabolism	Metabolism of cofactors and vitamins	bmor00760	Nicotinate and nicotinamide metabolism - Bombyx mori (domestic silkworm)	2/188	16/3672	0.196086892776056	0.98414230401902	0.98414230401902	101746518/101746962	2
	Genetic Information Processing	Folding, sorting and degradation	bmor04141	Protein processing in endoplasmic reticulum - Bombyx mori (domestic silkworm)	9/188	128/3672	0.206890500312834	0.98414230401902	0.98414230401902	101737155/733070/692887/692546/732862/733141/693079/692879/101737669	9
	Metabolism	Xenobiotics biodegradation and metabolism	bmor00982	Drug metabolism - cytochrome P450 - Bombyx mori (domestic silkworm)	5/188	62/3672	0.209541159799043	0.98414230401902	0.98414230401902	692678/101746194/100862843/100174975/100862845	5
	Metabolism	Amino acid metabolism	bmor00380	Tryptophan metabolism - Bombyx mori (domestic silkworm)	3/188	33/3672	0.237327139883751	0.98414230401902	0.98414230401902	692456/101745777/101745043	3
	Metabolism	Xenobiotics biodegradation and metabolism	bmor00980	Metabolism of xenobiotics by cytochrome P450 - Bombyx mori (domestic silkworm)	5/188	67/3672	0.257479484690623	0.98414230401902	0.98414230401902	692678/101746194/100862843/100174975/100862845	5
	Metabolism	Global and overview maps	bmor01200	Carbon metabolism - Bombyx mori (domestic silkworm)	8/188	119/3672	0.263178199924078	0.98414230401902	0.98414230401902	692456/692786/733134/101735662/100101211/101744897/732915/101742176	8
	Metabolism	Carbohydrate metabolism	bmor00053	Ascorbate and aldarate metabolism - Bombyx mori (domestic silkworm)	4/188	52/3672	0.274958016246961	0.98414230401902	0.98414230401902	100862843/101740272/100174975/100862845	4
	Metabolism	Metabolism of cofactors and vitamins	bmor00860	Porphyrin metabolism - Bombyx mori (domestic silkworm)	4/188	55/3672	0.310045617032959	0.98414230401902	0.98414230401902	100862843/101736226/100174975/100862845	4
	Metabolism	Carbohydrate metabolism	bmor00040	Pentose and glucuronate interconversions - Bombyx mori (domestic silkworm)	4/188	57/3672	0.333687212391862	0.98414230401902	0.98414230401902	100862843/101740272/100174975/100862845	4
	Metabolism	Global and overview maps	bmor01232	Nucleotide metabolism - Bombyx mori (domestic silkworm)	4/188	59/3672	0.357415753688723	0.98414230401902	0.98414230401902	101744452/100329147/101735934/100101186	4
	Cellular Processes	Transport and catabolism	bmor04145	Phagosome - Bombyx mori (domestic silkworm)	5/188	77/3672	0.35930010954718	0.98414230401902	0.98414230401902	733070/733141/693031/101744837/692428	5
	Environmental Information Processing	Signal transduction	bmor04330	Notch signaling pathway - Bombyx mori (domestic silkworm)	2/188	25/3672	0.368930059982251	0.98414230401902	0.98414230401902	101740207/692897	2
	NA	NA	bmor04382	Cornified envelope formation - Bombyx mori (domestic silkworm)	3/188	43/3672	0.379319134219535	0.98414230401902	0.98414230401902	101738407/101742786/692448	3
	Genetic Information Processing	Translation	bmor03013	Nucleocytoplasmic transport - Bombyx mori (domestic silkworm)	5/188	80/3672	0.390430164608319	0.98414230401902	0.98414230401902	692986/692970/101745770/101747136/101743523	5
	Metabolism	Carbohydrate metabolism	bmor00640	Propanoate metabolism - Bombyx mori (domestic silkworm)	2/188	27/3672	0.405962028089283	0.98414230401902	0.98414230401902	100124423/101735662	2
	Metabolism	Metabolism of cofactors and vitamins	bmor00790	Folate biosynthesis - Bombyx mori (domestic silkworm)	2/188	28/3672	0.424089083215612	0.98414230401902	0.98414230401902	692791/101741518	2
	Metabolism	Global and overview maps	bmor01212	Fatty acid metabolism - Bombyx mori (domestic silkworm)	5/188	85/3672	0.442019926281653	0.98414230401902	0.98414230401902	101738882/101735662/692518/100500748/105841738	5
	Genetic Information Processing	Transcription	bmor03020	RNA polymerase - Bombyx mori (domestic silkworm)	2/188	30/3672	0.459460666666161	0.98414230401902	0.98414230401902	101745151/101741478	2
	Metabolism	Amino acid metabolism	bmor00360	Phenylalanine metabolism - Bombyx mori (domestic silkworm)	1/188	12/3672	0.468279304777861	0.98414230401902	0.98414230401902	101745777	1
	Genetic Information Processing	Replication and repair	bmor03440	Homologous recombination - Bombyx mori (domestic silkworm)	2/188	31/3672	0.476671637448381	0.98414230401902	0.98414230401902	692385/101745991	2
	Metabolism	Lipid metabolism	bmor00062	Fatty acid elongation - Bombyx mori (domestic silkworm)	2/188	32/3672	0.493547779768528	0.98414230401902	0.98414230401902	100500748/105841738	2
	Metabolism	Glycan biosynthesis and metabolism	bmor00534	Glycosaminoglycan biosynthesis - heparan sulfate / heparin - Bombyx mori (domestic silkworm)	1/188	14/3672	0.521508310597351	0.98414230401902	0.98414230401902	101737390	1
	Metabolism	Metabolism of cofactors and vitamins	bmor00830	Retinol metabolism - Bombyx mori (domestic silkworm)	3/188	55/3672	0.540830639767377	0.98414230401902	0.98414230401902	100862843/100174975/100862845	3
	Metabolism	Glycan biosynthesis and metabolism	bmor00510	N-Glycan biosynthesis - Bombyx mori (domestic silkworm)	2/188	35/3672	0.542067479376349	0.98414230401902	0.98414230401902	100653407/692887	2
	Metabolism	Energy metabolism	bmor00910	Nitrogen metabolism - Bombyx mori (domestic silkworm)	1/188	15/3672	0.546100010326082	0.98414230401902	0.98414230401902	101744734	1
	Genetic Information Processing	Folding, sorting and degradation	bmor03018	RNA degradation - Bombyx mori (domestic silkworm)	3/188	56/3672	0.553225789474857	0.98414230401902	0.98414230401902	732955/101736615/778529	3
	Cellular Processes	Transport and catabolism	bmor04137	Mitophagy - animal - Bombyx mori (domestic silkworm)	3/188	56/3672	0.553225789474857	0.98414230401902	0.98414230401902	101736427/692779/101741275	3
	Environmental Information Processing	Signal transduction	bmor04391	Hippo signaling pathway - fly - Bombyx mori (domestic silkworm)	3/188	56/3672	0.553225789474857	0.98414230401902	0.98414230401902	100144579/101747103/778465	3
	Metabolism	Global and overview maps	bmor01210	2-Oxocarboxylic acid metabolism - Bombyx mori (domestic silkworm)	2/188	36/3672	0.557513789588593	0.98414230401902	0.98414230401902	733134/100101211	2
	Metabolism	Amino acid metabolism	bmor00270	Cysteine and methionine metabolism - Bombyx mori (domestic silkworm)	2/188	38/3672	0.587289538748029	0.98414230401902	0.98414230401902	100124423/101737039	2
	Metabolism	Lipid metabolism	bmor00061	Fatty acid biosynthesis - Bombyx mori (domestic silkworm)	1/188	17/3672	0.591574909351319	0.98414230401902	0.98414230401902	101738882	1
	Metabolism	Glycan biosynthesis and metabolism	bmor00541	Biosynthesis of various nucleotide sugars - Bombyx mori (domestic silkworm)	1/188	17/3672	0.591574909351319	0.98414230401902	0.98414230401902	101740272	1
	Cellular Processes	Cell growth and death	bmor04215	Apoptosis - multiple species - Bombyx mori (domestic silkworm)	1/188	17/3672	0.591574909351319	0.98414230401902	0.98414230401902	101738358	1
	Metabolism	Lipid metabolism	bmor00600	Sphingolipid metabolism - Bombyx mori (domestic silkworm)	2/188	39/3672	0.601614934836436	0.98414230401902	0.98414230401902	101742786/101744040	2
	Metabolism	Amino acid metabolism	bmor00280	Valine, leucine and isoleucine degradation - Bombyx mori (domestic silkworm)	2/188	40/3672	0.615564592016619	0.98414230401902	0.98414230401902	100500748/105841738	2
	Metabolism	Carbohydrate metabolism	bmor00630	Glyoxylate and dicarboxylate metabolism - Bombyx mori (domestic silkworm)	2/188	40/3672	0.615564592016619	0.98414230401902	0.98414230401902	692456/101745043	2
	Metabolism	Glycan biosynthesis and metabolism	bmor00513	Various types of N-glycan biosynthesis - Bombyx mori (domestic silkworm)	2/188	44/3672	0.667633331424582	0.98414230401902	0.98414230401902	100653407/692887	2
	Metabolism	Glycan biosynthesis and metabolism	bmor00514	Other types of O-glycan biosynthesis - Bombyx mori (domestic silkworm)	1/188	21/3672	0.669372044899603	0.98414230401902	0.98414230401902	101744145	1
	Genetic Information Processing	Folding, sorting and degradation	bmor04130	SNARE interactions in vesicular transport - Bombyx mori (domestic silkworm)	1/188	21/3672	0.669372044899603	0.98414230401902	0.98414230401902	101745699	1
	Cellular Processes	Transport and catabolism	bmor04140	Autophagy - animal - Bombyx mori (domestic silkworm)	5/188	111/3672	0.680616203365449	0.98414230401902	0.98414230401902	692779/101735336/692390/693031/101738071	5
	Metabolism	Carbohydrate metabolism	bmor00051	Fructose and mannose metabolism - Bombyx mori (domestic silkworm)	1/188	22/3672	0.686396984795214	0.98414230401902	0.98414230401902	732915	1
	Metabolism	Lipid metabolism	bmor00592	alpha-Linolenic acid metabolism - Bombyx mori (domestic silkworm)	1/188	22/3672	0.686396984795214	0.98414230401902	0.98414230401902	101735662	1
	Metabolism	Glycan biosynthesis and metabolism	bmor00563	Glycosylphosphatidylinositol (GPI)-anchor biosynthesis - Bombyx mori (domestic silkworm)	1/188	23/3672	0.702549688044118	0.98414230401902	0.98414230401902	101737110	1
	Cellular Processes	Transport and catabolism	bmor04136	Autophagy - other - Bombyx mori (domestic silkworm)	1/188	23/3672	0.702549688044118	0.98414230401902	0.98414230401902	101738071	1
	Genetic Information Processing	Translation	bmor03015	mRNA surveillance pathway - Bombyx mori (domestic silkworm)	3/188	70/3672	0.704482641776439	0.98414230401902	0.98414230401902	692986/101745600/778529	3
	Genetic Information Processing	Transcription	bmor03040	Spliceosome - Bombyx mori (domestic silkworm)	9/188	201/3672	0.712168654687152	0.98414230401902	0.98414230401902	732955/732980/101738204/733079/692972/778469/101738344/101736447/732985	9
	Environmental Information Processing	Signaling molecules and interaction	bmor04512	ECM-receptor interaction - Bombyx mori (domestic silkworm)	1/188	24/3672	0.717874615050889	0.98414230401902	0.98414230401902	101745246	1
	Metabolism	Nucleotide metabolism	bmor00230	Purine metabolism - Bombyx mori (domestic silkworm)	4/188	94/3672	0.718379481755044	0.98414230401902	0.98414230401902	101744452/100329147/101735934/100101186	4
	Metabolism	Lipid metabolism	bmor00561	Glycerolipid metabolism - Bombyx mori (domestic silkworm)	2/188	49/3672	0.72458154385272	0.98414230401902	0.98414230401902	101739608/101740254	2
	Organismal Systems	Digestive system	bmor04977	Vitamin digestion and absorption - Bombyx mori (domestic silkworm)	1/188	25/3672	0.732413971512082	0.98414230401902	0.98414230401902	101744837	1
	Cellular Processes	Transport and catabolism	bmor04142	Lysosome - Bombyx mori (domestic silkworm)	5/188	119/3672	0.738706516284398	0.98414230401902	0.98414230401902	101742786/692390/100101154/101747227/693031	5
	Metabolism	Lipid metabolism	bmor01040	Biosynthesis of unsaturated fatty acids - Bombyx mori (domestic silkworm)	2/188	51/3672	0.744957832772519	0.98414230401902	0.98414230401902	101735662/692518	2
	Metabolism	Glycan biosynthesis and metabolism	bmor00511	Other glycan degradation - Bombyx mori (domestic silkworm)	1/188	26/3672	0.746207822171728	0.98414230401902	0.98414230401902	101742786	1
	Metabolism	Metabolism of cofactors and vitamins	bmor00670	One carbon pool by folate - Bombyx mori (domestic silkworm)	1/188	26/3672	0.746207822171728	0.98414230401902	0.98414230401902	101737039	1
	Metabolism	Carbohydrate metabolism	bmor00030	Pentose phosphate pathway - Bombyx mori (domestic silkworm)	1/188	27/3672	0.759294198867206	0.98414230401902	0.98414230401902	732915	1
	Metabolism	Global and overview maps	bmor01250	Biosynthesis of nucleotide sugars - Bombyx mori (domestic silkworm)	1/188	27/3672	0.759294198867206	0.98414230401902	0.98414230401902	101740272	1
	Environmental Information Processing	Signal transduction	bmor04068	FoxO signaling pathway - Bombyx mori (domestic silkworm)	3/188	78/3672	0.771703493942312	0.98414230401902	0.98414230401902	692456/692560/101741790	3
	Metabolism	Metabolism of other amino acids	bmor00480	Glutathione metabolism - Bombyx mori (domestic silkworm)	2/188	55/3672	0.781869653164979	0.98414230401902	0.98414230401902	692678/101746194	2
	Metabolism	Amino acid metabolism	bmor00330	Arginine and proline metabolism - Bombyx mori (domestic silkworm)	1/188	31/3672	0.805260055564179	0.98414230401902	0.98414230401902	692924	1
	Environmental Information Processing	Signal transduction	bmor04341	Hedgehog signaling pathway - fly - Bombyx mori (domestic silkworm)	1/188	31/3672	0.805260055564179	0.98414230401902	0.98414230401902	101743039	1
	Environmental Information Processing	Signal transduction	bmor04150	mTOR signaling pathway - Bombyx mori (domestic silkworm)	4/188	107/3672	0.807358838116015	0.98414230401902	0.98414230401902	101739424/692560/100037428/101741790	4
	NA	NA	bmor03272	Virion - Hepatitis viruses - Bombyx mori (domestic silkworm)	1/188	32/3672	0.815315290267264	0.98414230401902	0.98414230401902	101744837	1
	Metabolism	Metabolism of other amino acids	bmor00410	beta-Alanine metabolism - Bombyx mori (domestic silkworm)	1/188	33/3672	0.824853951099615	0.98414230401902	0.98414230401902	101735662	1
	Metabolism	Nucleotide metabolism	bmor00240	Pyrimidine metabolism - Bombyx mori (domestic silkworm)	1/188	34/3672	0.833902441672099	0.98414230401902	0.98414230401902	100101186	1
	Genetic Information Processing	Transcription	bmor03022	Basal transcription factors - Bombyx mori (domestic silkworm)	1/188	35/3672	0.842485822916092	0.98414230401902	0.98414230401902	101743500	1
	Genetic Information Processing	Folding, sorting and degradation	bmor04120	Ubiquitin mediated proteolysis - Bombyx mori (domestic silkworm)	3/188	90/3672	0.84872258808567	0.98414230401902	0.98414230401902	101741790/692779/733026	3
	Metabolism	Amino acid metabolism	bmor00350	Tyrosine metabolism - Bombyx mori (domestic silkworm)	1/188	36/3672	0.850627881011163	0.98414230401902	0.98414230401902	101745777	1
	Metabolism	Carbohydrate metabolism	bmor00520	Amino sugar and nucleotide sugar metabolism - Bombyx mori (domestic silkworm)	1/188	36/3672	0.850627881011163	0.98414230401902	0.98414230401902	101740272	1
	Metabolism	Amino acid metabolism	bmor00260	Glycine, serine and threonine metabolism - Bombyx mori (domestic silkworm)	1/188	37/3672	0.858351191893975	0.98414230401902	0.98414230401902	693077	1
	Genetic Information Processing	Chromosome	bmor03083	Polycomb repressive complex - Bombyx mori (domestic silkworm)	1/188	38/3672	0.865677182519541	0.98414230401902	0.98414230401902	100862746	1
	Genetic Information Processing	Translation	bmor00970	Aminoacyl-tRNA biosynthesis - Bombyx mori (domestic silkworm)	1/188	39/3672	0.872626189037517	0.98414230401902	0.98414230401902	101739599	1
	Genetic Information Processing	Folding, sorting and degradation	bmor03050	Proteasome - Bombyx mori (domestic silkworm)	1/188	39/3672	0.872626189037517	0.98414230401902	0.98414230401902	732876	1
	Metabolism	Lipid metabolism	bmor00564	Glycerophospholipid metabolism - Bombyx mori (domestic silkworm)	2/188	72/3672	0.891330277239762	0.98414230401902	0.98414230401902	101739608/101740254	2
	Metabolism	Carbohydrate metabolism	bmor00562	Inositol phosphate metabolism - Bombyx mori (domestic silkworm)	1/188	43/3672	0.897023935775617	0.98414230401902	0.98414230401902	101745369	1
	Cellular Processes	Cell growth and death	bmor04214	Apoptosis - fly - Bombyx mori (domestic silkworm)	1/188	46/3672	0.912217129577016	0.98414230401902	0.98414230401902	101738358	1
	Environmental Information Processing	Signal transduction	bmor04070	Phosphatidylinositol signaling system - Bombyx mori (domestic silkworm)	1/188	47/3672	0.916768475313232	0.98414230401902	0.98414230401902	101740114	1
	Cellular Processes	Transport and catabolism	bmor04146	Peroxisome - Bombyx mori (domestic silkworm)	3/188	109/3672	0.924918234198741	0.98414230401902	0.98414230401902	692456/101738882/101735662	3
	Organismal Systems	Aging	bmor04213	Longevity regulating pathway - multiple species - Bombyx mori (domestic silkworm)	2/188	81/3672	0.926126324929065	0.98414230401902	0.98414230401902	692456/692560	2
	Genetic Information Processing	Translation	bmor03008	Ribosome biogenesis in eukaryotes - Bombyx mori (domestic silkworm)	6/188	188/3672	0.928007913620525	0.98414230401902	0.98414230401902	101742458/101735934/692970/692972/101745565/101746947	6
	Genetic Information Processing	Replication and repair	bmor03420	Nucleotide excision repair - Bombyx mori (domestic silkworm)	1/188	51/3672	0.932743449373432	0.98414230401902	0.98414230401902	101741478	1
	Cellular Processes	Transport and catabolism	bmor04144	Endocytosis - Bombyx mori (domestic silkworm)	3/188	117/3672	0.944924808787311	0.98414230401902	0.98414230401902	101737365/101742650/101741584	3
	Metabolism	Lipid metabolism	bmor00590	Arachidonic acid metabolism - Bombyx mori (domestic silkworm)	1/188	56/3672	0.948489561610042	0.98414230401902	0.98414230401902	101744069	1
	Metabolism	Global and overview maps	bmor01230	Biosynthesis of amino acids - Bombyx mori (domestic silkworm)	1/188	69/3672	0.974299513373141	0.98414230401902	0.98414230401902	692786	1
	Cellular Processes	Transport and catabolism	bmor04148	Efferocytosis - Bombyx mori (domestic silkworm)	1/188	69/3672	0.974299513373141	0.98414230401902	0.98414230401902	100415789	1
	Cellular Processes	Cell motility	bmor04814	Motor proteins - Bombyx mori (domestic silkworm)	2/188	106/3672	0.975841623881298	0.98414230401902	0.98414230401902	101737198/692428	2
	NA	NA	bmor04820	Cytoskeleton in muscle cells - Bombyx mori (domestic silkworm)	1/188	71/3672	0.976911931579467	0.98414230401902	0.98414230401902	101738553	1
	NA	NA	bmor04081	Hormone signaling - Bombyx mori (domestic silkworm)	1/188	73/3672	0.97926006984975	0.98414230401902	0.98414230401902	692560	1
	Environmental Information Processing	Signal transduction	bmor04310	Wnt signaling pathway - Bombyx mori (domestic silkworm)	1/188	77/3672	0.983267268256054	0.98414230401902	0.98414230401902	101741833	1
	Environmental Information Processing	Signal transduction	bmor04013	MAPK signaling pathway - fly - Bombyx mori (domestic silkworm)	1/188	78/3672	0.98414230401902	0.98414230401902	0.98414230401902	101738782	1
down-regulated	Genetic Information Processing	Folding, sorting and degradation	bmor04141	Protein processing in endoplasmic reticulum - Bombyx mori (domestic silkworm)	42/493	128/3672	7.55821074512192e-09	9.22101710904874e-07	8.27425176308084e-07	101739047/101741436/692539/101736652/101746261/101735495/692990/101735890/733039/100328606/100101162/101740210/101746859/101738264/101745384/101743683/101736274/692373/100862753/100302620/101737435/101746780/101736135/101738189/101737157/100862772/692629/101746543/101736562/100302619/101736558/100852386/101736224/692533/692420/733093/692822/692488/692487/101737887/778499/101739594	42
	Cellular Processes	Transport and catabolism	bmor04144	Endocytosis - Bombyx mori (domestic silkworm)	37/493	117/3672	1.8285221388041e-07	1.1153985046705e-05	1.00087527597698e-05	101742319/101738552/101745658/101746919/733058/101743173/101737319/101742207/101743746/101736709/101739513/101740393/101736454/101741262/100144600/101737965/101737168/101739687/101744291/101746390/100862757/732902/751839/101739334/101739657/101746168/101744535/101743249/101737683/100862772/732946/101742411/101736916/101740115/733093/692822/733063	37
	Genetic Information Processing	Folding, sorting and degradation	bmor04120	Ubiquitin mediated proteolysis - Bombyx mori (domestic silkworm)	26/493	90/3672	7.5092178507113e-05	0.0030537485926226	0.00274020581218939	100141465/101739047/101740509/101738475/101739389/101735782/101744303/101742775/101736244/101738264/101735478/100862757/101742453/101743548/101737533/101736311/101746780/101743486/101742698/692915/101741088/100529214/692576/101739865/100852386/101741287	26
	Organismal Systems	Immune system	bmor04620	Toll-like receptor signaling pathway - Bombyx mori (domestic silkworm)	11/493	29/3672	0.000805691969761276	0.0245736050777189	0.0220505170671507	100158253/100124425/100141428/101741278/100862757/101736389/100862753/100141438/101736835/100529236/101745667	11
	Genetic Information Processing	Chromosome	bmor03082	ATP-dependent chromatin remodeling - Bombyx mori (domestic silkworm)	19/493	68/3672	0.00109044875558892	0.0266069496363697	0.0238750885434206	101743995/101742611/101735441/101741028/101744221/733117/101745976/101741800/101737615/101739938/101745231/101744024/101741792/101737502/100145915/100145916/101739754/100529122/101739097	19
	Genetic Information Processing	Translation	bmor00970	Aminoacyl-tRNA biosynthesis - Bombyx mori (domestic silkworm)	12/493	39/3672	0.00376123394196968	0.0764784234867168	0.0686260228008503	101737924/693023/101736198/100499569/101746989/692991/693097/101740690/101742308/101741861/101740812/101735767	12
	Cellular Processes	Cell growth and death	bmor04214	Apoptosis - fly - Bombyx mori (domestic silkworm)	13/493	46/3672	0.00586811465260551	0.102272855373982	0.0917720186272141	693034/101743323/101742244/100141428/692756/100862757/101744411/693011/100862753/101736835/692520/100862754/101743155	13
	Organismal Systems	Aging	bmor04213	Longevity regulating pathway - multiple species - Bombyx mori (domestic silkworm)	19/493	81/3672	0.00915638745814101	0.13963490873665	0.125297933637719	101739615/100145904/100158253/101744333/101741436/101736652/101741278/101736445/101744252/100141438/692520/100862772/692754/692533/733093/692822/692488/692487/778499	19
	Cellular Processes	Transport and catabolism	bmor04140	Autophagy - animal - Bombyx mori (domestic silkworm)	24/493	111/3672	0.0105621035181581	0.14317518102392	0.128474709460636	101745952/101745433/100158253/101736823/100379191/101745443/101740181/101741278/692938/101741949/100862757/101739907/732902/101738668/101740354/101740612/101736850/101738047/100141438/101740636/101742698/692520/101738071/692559	24
	Cellular Processes	Transport and catabolism	bmor04137	Mitophagy - animal - Bombyx mori (domestic silkworm)	14/493	56/3672	0.0136460099156578	0.152966041430107	0.137260296020113	733058/101736823/101736701/101736709/692938/101746633/732902/101736506/101736835/101737157/101741924/101742698/692520/101743571	14
	Genetic Information Processing	Transcription	bmor03022	Basal transcription factors - Bombyx mori (domestic silkworm)	10/493	35/3672	0.0138415648155192	0.152966041430107	0.137260296020113	101745832/101745755/101746127/101743512/101745654/101744339/101745439/692612/101744550/101745815	10
	Organismal Systems	Environmental adaptation	bmor04711	Circadian rhythm - fly - Bombyx mori (domestic silkworm)	5/493	12/3672	0.0150458401406662	0.152966041430107	0.137260296020113	692522/101742096/733065/692728/101746519	5
	Environmental Information Processing	Signal transduction	bmor04070	Phosphatidylinositol signaling system - Bombyx mori (domestic silkworm)	12/493	47/3672	0.0183725232899093	0.172419064720688	0.154715985599237	101740910/101745952/101735658/100158253/101746775/105842530/101741278/101742216/101745288/101740354/101745335/101739314	12
	Genetic Information Processing	Chromosome	bmor03083	Polycomb repressive complex - Bombyx mori (domestic silkworm)	10/493	38/3672	0.0246167317341841	0.200216084771364	0.179658954410887	100529124/101745949/101737999/101739798/101735345/101738264/100862747/101744944/101737525/100529122	10
	Human Diseases	Infectious disease: bacterial	bmor05100	Bacterial invasion of epithelial cells - Bombyx mori (domestic silkworm)	10/493	38/3672	0.0246167317341841	0.200216084771364	0.179658954410887	101742319/100158253/101744450/101741278/101740267/751839/100145915/100145916/101739657/101744535	10
	Genetic Information Processing	Information processing in viruses	bmor03250	Viral life cycle - HIV-1 - Bombyx mori (domestic silkworm)	8/493	28/3672	0.0266455915949705	0.20317263591165	0.182311942491903	101746595/101747230/101737028/101742207/101744944/101744401/101743249/101743185	8
	Metabolism	Amino acid metabolism	bmor00310	Lysine degradation - Bombyx mori (domestic silkworm)	10/493	39/3672	0.0292760899891233	0.210098998745473	0.188527142964014	100141463/101738271/101742231/101736107/101735557/101738260/101739605/101737263/101737053/101747197	10
	Metabolism	Nucleotide metabolism	bmor00240	Pyrimidine metabolism - Bombyx mori (domestic silkworm)	9/493	34/3672	0.0311204591698513	0.210927556595659	0.189270628869271	692798/100873153/101744022/101736970/101738667/101743270/101741300/101737692/101742594	9
	Environmental Information Processing	Signal transduction	bmor04068	FoxO signaling pathway - Bombyx mori (domestic silkworm)	16/493	78/3672	0.0514600354275203	0.330427595903025	0.296501035150256	100145904/101738552/101745952/100158253/101744333/101737550/101737015/101741278/101739346/692938/101746293/101744944/692728/100141438/692520/101736570	16
	Genetic Information Processing	Translation	bmor03013	Nucleocytoplasmic transport - Bombyx mori (domestic silkworm)	16/493	80/3672	0.0626932679051242	0.382428934221258	0.343163150638575	101746595/101741929/732872/693102/101735669/101739355/101745770/101735469/101744401/101737898/101739030/101739167/101741753/101735812/101743073/101737307	16
	Genetic Information Processing	Translation	bmor03015	mRNA surveillance pathway - Bombyx mori (domestic silkworm)	14/493	70/3672	0.0783342088230311	0.455084451257609	0.408358782836854	692918/101741929/693102/101737436/101739213/101744068/101739716/692806/101739030/101739167/100127018/101743604/101735812/101740532	14
	Cellular Processes	Transport and catabolism	bmor04145	Phagosome - Bombyx mori (domestic silkworm)	15/493	77/3672	0.0844077492206927	0.468079336587478	0.420019421959428	733031/101745433/733058/732966/732990/101742516/101738141/101741734/101736274/732902/100145915/100145916/101742268/692629/101741915	15
	Metabolism	Carbohydrate metabolism	bmor00520	Amino sugar and nucleotide sugar metabolism - Bombyx mori (domestic silkworm)	8/493	36/3672	0.0999873000065283	0.512082052905588	0.45950417171856	693039/101746744/693032/101737108/101746460/101740507/101746316/101745054	8
	Organismal Systems	Immune system	bmor04624	Toll and Imd signaling pathway - Bombyx mori (domestic silkworm)	13/493	67/3672	0.105932	0.512082052905588	0.45950417171856	101743223/100124425/100141428/101735584/692440/101738264/100862753/101736835/100529236/101737382/100529214/101743155/101745667	13
	Cellular Processes	Transport and catabolism	bmor04142	Lysosome - Bombyx mori (domestic silkworm)	21/493	119/3672	0.11059027778079	0.512082052905588	0.45950417171856	733031/101745433/101739036/732966/101737816/101746186/101742516/101738141/101743490/692847/101736905/693032/101740461/101736893/100271726/101745680/101742059/101741318/101744899/101741915/101735961	21
	Environmental Information Processing	Signal transduction	bmor04341	Hedgehog signaling pathway - fly - Bombyx mori (domestic silkworm)	7/493	31/3672	0.111983011154882	0.512082052905588	0.45950417171856	101742384/101744135/101737144/101745289/692728/101746466/692674	7
	Metabolism	Carbohydrate metabolism	bmor00562	Inositol phosphate metabolism - Bombyx mori (domestic silkworm)	9/493	43/3672	0.113329634659433	0.512082052905588	0.45950417171856	101740910/101745952/101735658/101739930/105842530/101741278/101742216/101740354/101739314	9
	Environmental Information Processing	Signal transduction	bmor04150	mTOR signaling pathway - Bombyx mori (domestic silkworm)	19/493	107/3672	0.119122348996674	0.512695683646654	0.460054798095358	733031/101745952/101746912/100158253/101742902/101739980/100379191/732990/101745443/101736611/101739189/101741278/101741932/101739907/101736536/100141438/101739657/692520/101736570	19
	Environmental Information Processing	Signal transduction	bmor04391	Hippo signaling pathway - fly - Bombyx mori (domestic silkworm)	11/493	56/3672	0.121870285456991	0.512695683646654	0.460054798095358	101745685/101742244/101741262/101743174/101741252/101745387/100145915/100145916/692728/101742023/101740701	11
	Environmental Information Processing	Signal transduction	bmor04013	MAPK signaling pathway - fly - Bombyx mori (domestic silkworm)	14/493	78/3672	0.154447025739595	0.60343372760414	0.541476338833741	101742601/101743223/101744813/101738264/100862757/101736934/100862753/101735425/101736835/101743676/692520/101736570/101743155/100302610	14
	Metabolism	Metabolism of cofactors and vitamins	bmor00760	Nicotinate and nicotinamide metabolism - Bombyx mori (domestic silkworm)	4/493	16/3672	0.157477797383705	0.60343372760414	0.541476338833741	101746269/101736818/101735515/692483	4
	Metabolism	Lipid metabolism	bmor00564	Glycerophospholipid metabolism - Bombyx mori (domestic silkworm)	13/493	72/3672	0.160508002143891	0.60343372760414	0.541476338833741	101743990/101737816/101743589/101736119/692950/101746390/101745288/101746851/101741580/101741049/101746631/101745999/101745335	13
	Organismal Systems	Development and regeneration	bmor04320	Dorso-ventral axis formation - Bombyx mori (domestic silkworm)	5/493	22/3672	0.163223877138825	0.60343372760414	0.541476338833741	100125336/101743312/101736934/692520/101736570	5
	Cellular Processes	Cell growth and death	bmor04215	Apoptosis - multiple species - Bombyx mori (domestic silkworm)	4/493	17/3672	0.185412774990389	0.652016475446858	0.585070866664998	100141428/100529236/100529214/692576	4
	Cellular Processes	Transport and catabolism	bmor04136	Autophagy - other - Bombyx mori (domestic silkworm)	5/493	23/3672	0.187053906890492	0.652016475446858	0.585070866664998	101745443/692938/101741949/101740636/101738071	5
	Genetic Information Processing	Replication and repair	bmor03410	Base excision repair - Bombyx mori (domestic silkworm)	6/493	30/3672	0.206776851968468	0.689606751202198	0.618801571398003	101739679/101736557/692827/100862754/101737342/101735453	6
	Genetic Information Processing	Folding, sorting and degradation	bmor03018	RNA degradation - Bombyx mori (domestic silkworm)	10/493	56/3672	0.211388240885972	0.689606751202198	0.618801571398003	101741379/101745129/101738383/101743557/101742881/101736134/101739698/101739862/101745059/101739826	10
	Genetic Information Processing	Replication and repair	bmor03430	Mismatch repair - Bombyx mori (domestic silkworm)	4/493	18/3672	0.214795545456422	0.689606751202198	0.618801571398003	692484/101741322/101741887/101736557	4
	Genetic Information Processing	Replication and repair	bmor03440	Homologous recombination - Bombyx mori (domestic silkworm)	6/493	31/3672	0.229527373763728	0.718008707671149	0.644287364950815	692484/101744768/101735478/101738749/100126867/101745604	6
	Environmental Information Processing	Signal transduction	bmor04330	Notch signaling pathway - Bombyx mori (domestic silkworm)	5/493	25/3672	0.238018382267667	0.725956065916385	0.651418730416774	101736421/101745094/101744944/101743676/101739954	5
	Environmental Information Processing	Signal transduction	bmor04392	Hippo signaling pathway - multiple species - Bombyx mori (domestic silkworm)	3/493	13/3672	0.249008419987666	0.740951883865737	0.664874856963215	101742244/101741252/692728	3
	Metabolism	Global and overview maps	bmor01232	Nucleotide metabolism - Bombyx mori (domestic silkworm)	10/493	59/3672	0.262279498803605	0.761859496524756	0.68363578635526	692798/100873153/101744022/101736818/101736970/101740233/101738667/101741300/101741248/101746046	10
	Metabolism	Global and overview maps	bmor01250	Biosynthesis of nucleotide sugars - Bombyx mori (domestic silkworm)	5/493	27/3672	0.292222242470812	0.82909566468463	0.743968499803292	101746744/101740507/101746316/101745054/101736830	5
	Genetic Information Processing	Replication and repair	bmor03460	Fanconi anemia pathway - Bombyx mori (domestic silkworm)	6/493	34/3672	0.30177347952137	0.836735556854708	0.750823968187141	101737985/692484/101741322/101735478/100126867/100620066	6
	Cellular Processes	Transport and catabolism	bmor04148	Efferocytosis - Bombyx mori (domestic silkworm)	11/493	69/3672	0.317736771553022	0.86141969176597	0.77297366646817	101737109/733058/101742404/101737816/101741199/100526764/732902/101735519/101740612/101738047/692629	11
	Genetic Information Processing	Replication and repair	bmor03420	Nucleotide excision repair - Bombyx mori (domestic silkworm)	8/493	51/3672	0.3762485755249	0.997876656826909	0.895419950905941	101746067/101739752/101744339/692484/100328606/101736557/101745815/101741287	8
	Metabolism	Carbohydrate metabolism	bmor00500	Starch and sucrose metabolism - Bombyx mori (domestic silkworm)	4/493	24/3672	0.405822926625517	0.999999999999998	0.897325280414148	101741984/101736905/101745054/692454	4
	Organismal Systems	Sensory system	bmor04745	Phototransduction - fly - Bombyx mori (domestic silkworm)	4/493	25/3672	0.437785696979394	0.999999999999998	0.897325280414148	101739468/692442/100145915/100145916	4
	Metabolism	Glycan biosynthesis and metabolism	bmor00531	Glycosaminoglycan degradation - Bombyx mori (domestic silkworm)	3/493	18/3672	0.442541998987024	0.999999999999998	0.897325280414148	693032/101745680/101742059	3
	Metabolism	Metabolism of cofactors and vitamins	bmor00770	Pantothenate and CoA biosynthesis - Bombyx mori (domestic silkworm)	3/493	18/3672	0.442541998987024	0.999999999999998	0.897325280414148	101738185/101737692/101742594	3
	Metabolism	Glycan biosynthesis and metabolism	bmor00511	Other glycan degradation - Bombyx mori (domestic silkworm)	4/493	26/3672	0.469236961025042	0.999999999999998	0.897325280414148	101746737/101743490/101746114/693032	4
	Genetic Information Processing	Replication and repair	bmor03030	DNA replication - Bombyx mori (domestic silkworm)	5/493	34/3672	0.488196302923596	0.999999999999998	0.897325280414148	101743127/692484/101746695/101736557/101741108	5
	Cellular Processes	Cell motility	bmor04814	Motor proteins - Bombyx mori (domestic silkworm)	14/493	106/3672	0.571038670745557	0.999999999999998	0.897325280414148	101741495/101738943/101739468/101736491/101743085/100144601/101741734/100144600/101743227/101738291/100145915/100145916/101742268/101742699	14
	Metabolism	Glycan biosynthesis and metabolism	bmor00534	Glycosaminoglycan biosynthesis - heparan sulfate / heparin - Bombyx mori (domestic silkworm)	2/493	14/3672	0.579090467231792	0.999999999999998	0.897325280414148	101739145/101743047	2
	Metabolism	Carbohydrate metabolism	bmor00052	Galactose metabolism - Bombyx mori (domestic silkworm)	3/493	22/3672	0.582666508050804	0.999999999999998	0.897325280414148	101736905/101746316/101745054	3
	Genetic Information Processing	Transcription	bmor03020	RNA polymerase - Bombyx mori (domestic silkworm)	4/493	30/3672	0.587167867999686	0.999999999999998	0.897325280414148	101746067/101746840/101737159/100379192	4
	Metabolism	Amino acid metabolism	bmor00270	Cysteine and methionine metabolism - Bombyx mori (domestic silkworm)	5/493	38/3672	0.591876764138637	0.999999999999998	0.897325280414148	733082/101745635/101742094/101745237/101742616	5
	Environmental Information Processing	Signal transduction	bmor04310	Wnt signaling pathway - Bombyx mori (domestic silkworm)	10/493	77/3672	0.596983210883883	0.999999999999998	0.897325280414148	101738552/101737550/692577/101744450/101744944/692728/101739657/101736835/101743676/101739954	10
	Metabolism	Lipid metabolism	bmor00600	Sphingolipid metabolism - Bombyx mori (domestic silkworm)	5/493	39/3672	0.615934422779789	0.999999999999998	0.897325280414148	101741167/101743812/101746114/693032/101746851	5
	Genetic Information Processing	Folding, sorting and degradation	bmor03050	Proteasome - Bombyx mori (domestic silkworm)	5/493	39/3672	0.615934422779789	0.999999999999998	0.897325280414148	733131/101746211/778515/692900/693113	5
	Metabolism	Energy metabolism	bmor00910	Nitrogen metabolism - Bombyx mori (domestic silkworm)	2/493	15/3672	0.617900312520617	0.999999999999998	0.897325280414148	692876/101738069	2
	Environmental Information Processing	Signal transduction	bmor04350	TGF-beta signaling pathway - Bombyx mori (domestic silkworm)	6/493	47/3672	0.618450209893114	0.999999999999998	0.897325280414148	101745746/101738552/101737999/693081/101744944/101739657	6
	Environmental Information Processing	Membrane transport	bmor02010	ABC transporters - Bombyx mori (domestic silkworm)	5/493	40/3672	0.639140683804763	0.999999999999998	0.897325280414148	101745183/101738887/101741720/101739808/101743689	5
	NA	NA	bmor03272	Virion - Hepatitis viruses - Bombyx mori (domestic silkworm)	4/493	32/3672	0.640067613240939	0.999999999999998	0.897325280414148	101745433/101742207/692847/101743249	4
	Environmental Information Processing	Signaling molecules and interaction	bmor04512	ECM-receptor interaction - Bombyx mori (domestic silkworm)	3/493	24/3672	0.643782490402947	0.999999999999998	0.897325280414148	101746961/101747051/100862837	3
	Metabolism	Glycan biosynthesis and metabolism	bmor00541	Biosynthesis of various nucleotide sugars - Bombyx mori (domestic silkworm)	2/493	17/3672	0.687141380850847	0.999999999999998	0.897325280414148	101746744/101736830	2
	Metabolism	Metabolism of terpenoids and polyketides	bmor00900	Terpenoid backbone biosynthesis - Bombyx mori (domestic silkworm)	3/493	26/3672	0.698303744999743	0.999999999999998	0.897325280414148	101737879/692501/692537	3
	Metabolism	Carbohydrate metabolism	bmor00640	Propanoate metabolism - Bombyx mori (domestic silkworm)	3/493	27/3672	0.723088946941054	0.999999999999998	0.897325280414148	101746722/101744675/101740061	3
	Metabolism	Carbohydrate metabolism	bmor00020	Citrate cycle (TCA cycle) - Bombyx mori (domestic silkworm)	4/493	36/3672	0.731860151746276	0.999999999999998	0.897325280414148	101735811/101740061/100329146/101746165	4
	Metabolism	Carbohydrate metabolism	bmor00010	Glycolysis / Gluconeogenesis - Bombyx mori (domestic silkworm)	5/493	46/3672	0.75918132561667	0.999999999999998	0.897325280414148	101746722/101739930/101746527/101745054/101746883	5
	Metabolism	Metabolism of other amino acids	bmor00480	Glutathione metabolism - Bombyx mori (domestic silkworm)	6/493	55/3672	0.767124808553524	0.999999999999998	0.897325280414148	733113/100873153/101742623/692941/101742094/101745237	6
	Metabolism	Glycan biosynthesis and metabolism	bmor00514	Other types of O-glycan biosynthesis - Bombyx mori (domestic silkworm)	2/493	21/3672	0.794672219237381	0.999999999999998	0.897325280414148	100141463/101737525	2
	Genetic Information Processing	Folding, sorting and degradation	bmor04130	SNARE interactions in vesicular transport - Bombyx mori (domestic silkworm)	2/493	21/3672	0.794672219237381	0.999999999999998	0.897325280414148	101738668/101736850	2
	Metabolism	Lipid metabolism	bmor00565	Ether lipid metabolism - Bombyx mori (domestic silkworm)	3/493	31/3672	0.806547870974994	0.999999999999998	0.897325280414148	101736689/101746390/101746631	3
	Metabolism	Lipid metabolism	bmor00561	Glycerolipid metabolism - Bombyx mori (domestic silkworm)	5/493	49/3672	0.806741729022764	0.999999999999998	0.897325280414148	101745288/101741580/101745335/100141426/101746883	5
	Metabolism	Lipid metabolism	bmor00592	alpha-Linolenic acid metabolism - Bombyx mori (domestic silkworm)	2/493	22/3672	0.815872790356039	0.999999999999998	0.897325280414148	101744675/101746631	2
	Metabolism	Metabolism of other amino acids	bmor00410	beta-Alanine metabolism - Bombyx mori (domestic silkworm)	3/493	33/3672	0.839667285643573	0.999999999999998	0.897325280414148	101744675/101737692/101742594	3
	NA	NA	bmor04382	Cornified envelope formation - Bombyx mori (domestic silkworm)	4/493	43/3672	0.848405118973763	0.999999999999998	0.897325280414148	100174941/101746772/101746114/101739716	4
	NA	NA	bmor04820	Cytoskeleton in muscle cells - Bombyx mori (domestic silkworm)	7/493	71/3672	0.85883054313841	0.999999999999998	0.897325280414148	101737442/101743323/101747051/101743312/100145915/100145916/101746046	7
	Metabolism	Glycan biosynthesis and metabolism	bmor00510	N-Glycan biosynthesis - Bombyx mori (domestic silkworm)	3/493	35/3672	0.867775324159044	0.999999999999998	0.897325280414148	101737122/101739008/733008	3
	NA	NA	bmor04081	Hormone signaling - Bombyx mori (domestic silkworm)	7/493	73/3672	0.877453195420804	0.999999999999998	0.897325280414148	101739615/100158253/692442/101741278/101744252/101739657/733012	7
	Metabolism	Xenobiotics biodegradation and metabolism	bmor00983	Drug metabolism - other enzymes - Bombyx mori (domestic silkworm)	9/493	91/3672	0.879808297690479	0.999999999999998	0.897325280414148	692798/100873153/101744022/692941/101736970/101740233/100862820/101737692/101742594	9
	Metabolism	Carbohydrate metabolism	bmor00030	Pentose phosphate pathway - Bombyx mori (domestic silkworm)	2/493	27/3672	0.895091181350062	0.999999999999998	0.897325280414148	733113/101739194	2
	Metabolism	Metabolism of cofactors and vitamins	bmor00130	Ubiquinone and other terpenoid-quinone biosynthesis - Bombyx mori (domestic silkworm)	2/493	27/3672	0.895091181350062	0.999999999999998	0.897325280414148	101746908/101747041	2
	Metabolism	Nucleotide metabolism	bmor00230	Purine metabolism - Bombyx mori (domestic silkworm)	9/493	94/3672	0.901497977703391	0.999999999999998	0.897325280414148	101739615/100873153/101736818/101740233/101744252/101741300/101741248/101735940/101746046	9
	Genetic Information Processing	Folding, sorting and degradation	bmor03060	Protein export - Bombyx mori (domestic silkworm)	2/493	28/3672	0.906539847538223	0.999999999999998	0.897325280414148	692373/101736319	2
	Metabolism	Lipid metabolism	bmor00061	Fatty acid biosynthesis - Bombyx mori (domestic silkworm)	1/493	17/3672	0.914278256031811	0.999999999999998	0.897325280414148	101742305	1
	Metabolism	Amino acid metabolism	bmor00250	Alanine, aspartate and glutamate metabolism - Bombyx mori (domestic silkworm)	2/493	30/3672	0.926018592690327	0.999999999999998	0.897325280414148	101746741/101746890	2
	NA	NA	bmor04082	Neuroactive ligand signaling - Bombyx mori (domestic silkworm)	6/493	71/3672	0.929677414896536	0.999999999999998	0.897325280414148	101739615/692442/101744252/101745328/101741951/733012	6
	NA	NA	bmor04981	Folate transport and metabolism - Bombyx mori (domestic silkworm)	1/493	19/3672	0.935846340449943	0.999999999999998	0.897325280414148	101743689	1
	Metabolism	Global and overview maps	bmor01200	Carbon metabolism - Bombyx mori (domestic silkworm)	11/493	119/3672	0.938895444196077	0.999999999999998	0.897325280414148	101746722/733113/101735811/101744675/101746890/101745635/101740061/101746527/101745054/100329146/101746165	11
	Metabolism	Lipid metabolism	bmor00062	Fatty acid elongation - Bombyx mori (domestic silkworm)	2/493	32/3672	0.941623818555691	0.999999999999998	0.897325280414148	101739036/101744618	2
	Metabolism	Glycan biosynthesis and metabolism	bmor00513	Various types of N-glycan biosynthesis - Bombyx mori (domestic silkworm)	3/493	44/3672	0.947240739740935	0.999999999999998	0.897325280414148	101737122/693032/101739008	3
	Metabolism	Carbohydrate metabolism	bmor00051	Fructose and mannose metabolism - Bombyx mori (domestic silkworm)	1/493	22/3672	0.958478025702969	0.999999999999998	0.897325280414148	101745054	1
	Metabolism	Lipid metabolism	bmor00071	Fatty acid degradation - Bombyx mori (domestic silkworm)	2/493	36/3672	0.963956732041241	0.999999999999998	0.897325280414148	101737109/101744675	2
	Metabolism	Global and overview maps	bmor01210	2-Oxocarboxylic acid metabolism - Bombyx mori (domestic silkworm)	2/493	36/3672	0.963956732041241	0.999999999999998	0.897325280414148	101746890/100329146	2
	Metabolism	Glycan biosynthesis and metabolism	bmor00563	Glycosylphosphatidylinositol (GPI)-anchor biosynthesis - Bombyx mori (domestic silkworm)	1/493	23/3672	0.96408633620391	0.999999999999998	0.897325280414148	101741111	1
	Metabolism	Amino acid metabolism	bmor00260	Glycine, serine and threonine metabolism - Bombyx mori (domestic silkworm)	2/493	37/3672	0.968099921486538	0.999999999999998	0.897325280414148	101736114/101742616	2
	Metabolism	Amino acid metabolism	bmor00220	Arginine biosynthesis - Bombyx mori (domestic silkworm)	1/493	24/3672	0.968938470008095	0.999999999999998	0.897325280414148	101746890	1
	Metabolism	Carbohydrate metabolism	bmor00620	Pyruvate metabolism - Bombyx mori (domestic silkworm)	2/493	39/3672	0.975054559127753	0.999999999999998	0.897325280414148	101746722/101746883	2
	Metabolism	Lipid metabolism	bmor01040	Biosynthesis of unsaturated fatty acids - Bombyx mori (domestic silkworm)	3/493	51/3672	0.975349713357699	0.999999999999998	0.897325280414148	101744675/101744618/101745499	3
	Metabolism	Metabolism of cofactors and vitamins	bmor00670	One carbon pool by folate - Bombyx mori (domestic silkworm)	1/493	26/3672	0.976767641350967	0.999999999999998	0.897325280414148	101742616	1
	Metabolism	Global and overview maps	bmor01212	Fatty acid metabolism - Bombyx mori (domestic silkworm)	6/493	85/3672	0.979271998936139	0.999999999999998	0.897325280414148	101737109/101739036/101744675/101742305/101744618/101745499	6
	Metabolism	Metabolism of cofactors and vitamins	bmor00790	Folate biosynthesis - Bombyx mori (domestic silkworm)	1/493	28/3672	0.982626421292786	0.999999999999998	0.897325280414148	100134930	1
	Metabolism	Metabolism of cofactors and vitamins	bmor00860	Porphyrin metabolism - Bombyx mori (domestic silkworm)	3/493	55/3672	0.984270624578536	0.999999999999998	0.897325280414148	100862820/692932/732916	3
	Cellular Processes	Transport and catabolism	bmor04146	Peroxisome - Bombyx mori (domestic silkworm)	8/493	109/3672	0.985110770174348	0.999999999999998	0.897325280414148	105842517/692884/101742645/101744675/101746741/101746999/101745499/101743537	8
	Metabolism	Lipid metabolism	bmor00590	Arachidonic acid metabolism - Bombyx mori (domestic silkworm)	3/493	56/3672	0.985961973636911	0.999999999999998	0.897325280414148	101746631/101745595/101742192	3
	Metabolism	Carbohydrate metabolism	bmor00040	Pentose and glucuronate interconversions - Bombyx mori (domestic silkworm)	3/493	57/3672	0.987478283866974	0.999999999999998	0.897325280414148	100862820/101740023/101746883	3
	Metabolism	Global and overview maps	bmor01230	Biosynthesis of amino acids - Bombyx mori (domestic silkworm)	4/493	69/3672	0.987982795647941	0.999999999999998	0.897325280414148	101746890/101745635/100329146/101742616	4
	Metabolism	Amino acid metabolism	bmor00330	Arginine and proline metabolism - Bombyx mori (domestic silkworm)	1/493	31/3672	0.988768353591274	0.999999999999998	0.897325280414148	101742094	1
	Metabolism	Amino acid metabolism	bmor00380	Tryptophan metabolism - Bombyx mori (domestic silkworm)	1/493	33/3672	0.991604378970763	0.999999999999998	0.897325280414148	692509	1
	Metabolism	Energy metabolism	bmor00190	Oxidative phosphorylation - Bombyx mori (domestic silkworm)	9/493	131/3672	0.994735934155089	0.999999999999998	0.897325280414148	733031/101735811/101740562/732966/732990/101742516/101738141/101741915/101746165	9
	Metabolism	Carbohydrate metabolism	bmor00053	Ascorbate and aldarate metabolism - Bombyx mori (domestic silkworm)	2/493	52/3672	0.995178500150698	0.999999999999998	0.897325280414148	100862820/101746883	2
	Metabolism	Carbohydrate metabolism	bmor00630	Glyoxylate and dicarboxylate metabolism - Bombyx mori (domestic silkworm)	1/493	40/3672	0.996972415895881	0.999999999999998	0.897325280414148	101746722	1
	Metabolism	Xenobiotics biodegradation and metabolism	bmor00982	Drug metabolism - cytochrome P450 - Bombyx mori (domestic silkworm)	2/493	62/3672	0.99869236205481	0.999999999999998	0.897325280414148	692941/100862820	2
	Genetic Information Processing	Transcription	bmor03040	Spliceosome - Bombyx mori (domestic silkworm)	14/493	201/3672	0.999010478112953	0.999999999999998	0.897325280414148	101740129/733142/101743516/101738436/101735469/733053/101740684/101737477/100862772/101743561/101742271/101746103/733093/692822	14
	Metabolism	Xenobiotics biodegradation and metabolism	bmor00980	Metabolism of xenobiotics by cytochrome P450 - Bombyx mori (domestic silkworm)	2/493	67/3672	0.999325852989149	0.999999999999998	0.897325280414148	692941/100862820	2
	Metabolism	Metabolism of cofactors and vitamins	bmor00830	Retinol metabolism - Bombyx mori (domestic silkworm)	1/493	55/3672	0.999662090203904	0.999999999999998	0.897325280414148	100862820	1
	Metabolism	Global and overview maps	bmor01240	Biosynthesis of cofactors - Bombyx mori (domestic silkworm)	8/493	155/3672	0.999824797843185	0.999999999999998	0.897325280414148	101746269/101738185/692509/101735515/100862820/101745237/692932/101746883	8
	Genetic Information Processing	Translation	bmor03008	Ribosome biogenesis in eukaryotes - Bombyx mori (domestic silkworm)	9/493	188/3672	0.99998206023051	0.999999999999998	0.897325280414148	101735526/101742366/101745253/101746403/101738143/101739030/101736366/101739167/101735374	9
	Environmental Information Processing	Signaling molecules and interaction	bmor04080	Neuroactive ligand-receptor interaction - Bombyx mori (domestic silkworm)	1/493	93/3672	0.999998749293143	0.999999999999998	0.897325280414148	101745328	1
	Genetic Information Processing	Translation	bmor03010	Ribosome - Bombyx mori (domestic silkworm)	3/493	271/3672	0.999999999999998	0.999999999999998	0.897325280414148	692667/692700/732873	3

## Sheet: 6-KEGG-L5D6 Yki knockout
	category	subcategory	ID	Description	GeneRatio	BgRatio	pvalue	p.adjust	qvalue	geneID	Count
up-regulated	Metabolism	Energy metabolism	bmor00190	Oxidative phosphorylation - Bombyx mori (domestic silkworm)	45/274	131/3672	6.218552211155e-20	7.27570608705135e-18	6.67676132145063e-18	100302108/101739119/101738358/100174851/100134921/732934/751613/778510/100134927/101738009/692925/101738229/101738548/732989/101742139/100101181/733123/100127128/100127121/100101165/101744608/101738045/101737782/101746922/101744632/733018/693099/692926/101738954/692985/780848/101745480/100134926/101746562/101737774/692866/101741007/733114/101742176/101746156/732900/101746782/778517/778519/732965	45
	Metabolism	Carbohydrate metabolism	bmor00010	Glycolysis / Gluconeogenesis - Bombyx mori (domestic silkworm)	12/274	46/3672	9.12538929983016e-05	0.00464004070242665	0.00425806704136319	100124423/733134/100037426/100101211/101741280/778467/693076/692988/733130/778462/732915/692608	12
	Genetic Information Processing	Folding, sorting and degradation	bmor03060	Protein export - Bombyx mori (domestic silkworm)	9/274	28/3672	0.000122623359785961	0.00464004070242665	0.00425806704136319	733070/732924/692977/733141/101738101/101746206/733068/101738661/101746382	9
	Genetic Information Processing	Translation	bmor03010	Ribosome - Bombyx mori (domestic silkworm)	37/274	271/3672	0.000158633870168433	0.00464004070242665	0.00425806704136319	693066/692706/692720/101740588/692696/101736455/692701/692700/692694/692779/693068/692697/692704/692662/101739135/692705/692717/778451/692657/692707/692660/692692/693065/692424/100101150/101737237/732856/692716/778514/692709/692714/692702/692695/692726/778455/101737987/692723	37
	Cellular Processes	Transport and catabolism	bmor04145	Phagosome - Bombyx mori (domestic silkworm)	15/274	77/3672	0.000434382244788125	0.0101645445280421	0.00932778715123974	733070/692429/100313947/733141/101746381/100145915/100145916/101738908/101743002/692985/692432/692511/733068/101746782/692428	15
	Metabolism	Carbohydrate metabolism	bmor00020	Citrate cycle (TCA cycle) - Bombyx mori (domestic silkworm)	9/274	36/3672	0.000982137127807444	0.0177247497741878	0.0162656273231413	733134/101735810/100101211/101738186/733130/101739299/692608/101742176/101736268	9
	Genetic Information Processing	Folding, sorting and degradation	bmor04141	Protein processing in endoplasmic reticulum - Bombyx mori (domestic silkworm)	20/274	128/3672	0.001060455114695	0.0177247497741878	0.0162656273231413	100126162/101736101/733070/101740455/101745402/692887/692546/101742383/732862/692436/778504/692673/692594/101746859/733141/101747213/101743498/733068/101738661/101738119	20
	Environmental Information Processing	Signaling molecules and interaction	bmor04512	ECM-receptor interaction - Bombyx mori (domestic silkworm)	7/274	24/3672	0.00136598538950255	0.0199775363214748	0.0183329618064816	101742998/101741524/100313947/101746113/100862837/101743002/101743808	7
	Metabolism	Global and overview maps	bmor01200	Carbon metabolism - Bombyx mori (domestic silkworm)	18/274	119/3672	0.00272092802648932	0.0353720643443611	0.0324601940002234	732869/692939/733134/692848/101735810/100037426/692964/100101211/778467/693076/101745599/101738186/778462/732915/101739299/692608/101742176/101736268	18
	Metabolism	Global and overview maps	bmor01210	2-Oxocarboxylic acid metabolism - Bombyx mori (domestic silkworm)	7/274	36/3672	0.0152255260793342	0.17813865512821	0.163474069483378	732869/733134/100101211/101738186/101739299/692608/101736268	7
	Metabolism	Global and overview maps	bmor01230	Biosynthesis of amino acids - Bombyx mori (domestic silkworm)	10/274	69/3672	0.0302926265834426	0.318420602062638	0.292207839949519	101738265/732869/692801/692848/100037426/692964/778467/693076/101738186/101739299	10
	Metabolism	Amino acid metabolism	bmor00380	Tryptophan metabolism - Bombyx mori (domestic silkworm)	6/274	33/3672	0.0326585232884757	0.318420602062638	0.292207839949519	101745777/101745043/101745599/692988/692608/101736268	6
	Metabolism	Glycan biosynthesis and metabolism	bmor00510	N-Glycan biosynthesis - Bombyx mori (domestic silkworm)	6/274	35/3672	0.0422730776657383	0.375764841443707	0.344831433443618	101736101/101740455/101745402/692887/778504/101747213	6
	Metabolism	Carbohydrate metabolism	bmor00030	Pentose phosphate pathway - Bombyx mori (domestic silkworm)	5/274	27/3672	0.0463083440472987	0.375764841443707	0.344831433443618	692848/778467/101739464/778462/732915	5
	Metabolism	Metabolism of cofactors and vitamins	bmor00785	Lipoic acid metabolism - Bombyx mori (domestic silkworm)	4/274	19/3672	0.0481749796722702	0.375764841443707	0.344831433443618	733134/100101211/692608/101736268	4
	Metabolism	Amino acid metabolism	bmor00360	Phenylalanine metabolism - Bombyx mori (domestic silkworm)	3/274	12/3672	0.0546132762249861	0.399359582395211	0.366483827299249	101745777/732869/692890	3
	Metabolism	Amino acid metabolism	bmor00310	Lysine degradation - Bombyx mori (domestic silkworm)	6/274	39/3672	0.0663808744256719	0.431475683766867	0.395956093065411	101743644/101745599/692988/692608/101736268/101742724	6
	Metabolism	Carbohydrate metabolism	bmor00620	Pyruvate metabolism - Bombyx mori (domestic silkworm)	6/274	39/3672	0.0663808744256719	0.431475683766867	0.395956093065411	100124423/733134/100101211/692988/733130/692608	6
	Metabolism	Carbohydrate metabolism	bmor00051	Fructose and mannose metabolism - Bombyx mori (domestic silkworm)	4/274	22/3672	0.0763937656315213	0.470424767309894	0.431698841795855	778467/100529206/732915/101736565	4
	Metabolism	Energy metabolism	bmor00910	Nitrogen metabolism - Bombyx mori (domestic silkworm)	3/274	15/3672	0.0958607897956596	0.560785620304609	0.514621082060909	101738265/692939/101744734	3
	Metabolism	Glycan biosynthesis and metabolism	bmor00513	Various types of N-glycan biosynthesis - Bombyx mori (domestic silkworm)	6/274	44/3672	0.105782501894427	0.589359653411805	0.540842866828647	101736101/101740455/101745402/692887/778504/101747213	6
	Cellular Processes	Transport and catabolism	bmor04137	Mitophagy - animal - Bombyx mori (domestic silkworm)	7/274	56/3672	0.120339684051502	0.639988319728444	0.587303721208288	100126162/101739767/692594/692779/692538/101736701/101736787	7
	Genetic Information Processing	Chromosome	bmor03082	ATP-dependent chromatin remodeling - Bombyx mori (domestic silkworm)	8/274	68/3672	0.131058818718972	0.666690512613902	0.61180775786431	101742611/101743114/101735816/101744024/100145915/100145916/100271910/101743297	8
	Metabolism	Carbohydrate metabolism	bmor00640	Propanoate metabolism - Bombyx mori (domestic silkworm)	4/274	27/3672	0.137656630137319	0.671076071919428	0.615832292719583	100124423/101735810/101745599/692608	4
	Metabolism	Amino acid metabolism	bmor00270	Cysteine and methionine metabolism - Bombyx mori (domestic silkworm)	5/274	38/3672	0.149532175597172	0.699810581794767	0.64220134361733	100124423/100101173/732869/692801/692964	5
	Genetic Information Processing	Translation	bmor00970	Aminoacyl-tRNA biosynthesis - Bombyx mori (domestic silkworm)	5/274	39/3672	0.161760308122393	0.72792138655077	0.667998033541867	101739633/692991/101742209/101743384/101739247	5
	Metabolism	Amino acid metabolism	bmor00280	Valine, leucine and isoleucine degradation - Bombyx mori (domestic silkworm)	5/274	40/3672	0.174377052055222	0.742128999851383	0.681036059242834	101746258/101745599/105841738/692988/692608	5
	Metabolism	Global and overview maps	bmor01240	Biosynthesis of cofactors - Bombyx mori (domestic silkworm)	15/274	155/3672	0.177603521331955	0.742128999851383	0.681036059242834	101739864/101739592/100329147/692593/101747022/692964/101742139/100101186/101745043/692988/692608/100862843/100862815/101739247/100862845	15
	Metabolism	Carbohydrate metabolism	bmor00052	Galactose metabolism - Bombyx mori (domestic silkworm)	3/274	22/3672	0.22324153774219	0.85350157795338	0.783240314451145	100302607/101741280/101736565	3
	Metabolism	Metabolism of cofactors and vitamins	bmor00860	Porphyrin metabolism - Bombyx mori (domestic silkworm)	6/274	55/3672	0.224370395145098	0.85350157795338	0.783240314451145	692593/101742139/100862843/100862815/101739247/100862845	6
	Genetic Information Processing	Folding, sorting and degradation	bmor04120	Ubiquitin mediated proteolysis - Bombyx mori (domestic silkworm)	9/274	90/3672	0.226141443731237	0.85350157795338	0.783240314451145	101741946/101738475/101746688/101741790/101743805/692779/692788/101739449/101740849	9
	Environmental Information Processing	Signal transduction	bmor04391	Hippo signaling pathway - fly - Bombyx mori (domestic silkworm)	6/274	56/3672	0.23685408047633	0.858333950321618	0.787674880187179	100126162/101737820/692854/778465/100145915/100145916	6
	Genetic Information Processing	Translation	bmor03013	Nucleocytoplasmic transport - Bombyx mori (domestic silkworm)	8/274	80/3672	0.244462517108929	0.858333950321618	0.787674880187179	693059/692970/101742757/101741033/101745770/101740958/692969/101739989	8
	Metabolism	Carbohydrate metabolism	bmor00040	Pentose and glucuronate interconversions - Bombyx mori (domestic silkworm)	6/274	57/3672	0.249545718920835	0.858333950321618	0.787674880187179	692593/100529206/100862843/100862815/101736565/100862845	6
	Metabolism	Amino acid metabolism	bmor00220	Arginine biosynthesis - Bombyx mori (domestic silkworm)	3/274	24/3672	0.264308393008563	0.858333950321618	0.787674880187179	101738265/732869/692939	3
	NA	NA	bmor04820	Cytoskeleton in muscle cells - Bombyx mori (domestic silkworm)	7/274	71/3672	0.276991110212396	0.858333950321618	0.787674880187179	101746632/100037426/100313947/101746113/100145915/100145916/101743002	7
	Metabolism	Lipid metabolism	bmor00071	Fatty acid degradation - Bombyx mori (domestic silkworm)	4/274	36/3672	0.279592341011275	0.858333950321618	0.787674880187179	101746258/101745599/105841738/692988	4
	Organismal Systems	Sensory system	bmor04745	Phototransduction - fly - Bombyx mori (domestic silkworm)	3/274	25/3672	0.285187554983496	0.858333950321618	0.787674880187179	100145915/100145916/692927	3
	Metabolism	Amino acid metabolism	bmor00260	Glycine, serine and threonine metabolism - Bombyx mori (domestic silkworm)	4/274	37/3672	0.296789401940854	0.858333950321618	0.787674880187179	692801/692964/693076/692608	4
	Metabolism	Metabolism of cofactors and vitamins	bmor00670	One carbon pool by folate - Bombyx mori (domestic silkworm)	3/274	26/3672	0.306195903366138	0.858333950321618	0.787674880187179	100101173/692801/692608	3
	Metabolism	Metabolism of cofactors and vitamins	bmor00730	Thiamine metabolism - Bombyx mori (domestic silkworm)	2/274	15/3672	0.309617561821493	0.858333950321618	0.787674880187179	100329147/101747022	2
	Human Diseases	Infectious disease: bacterial	bmor05100	Bacterial invasion of epithelial cells - Bombyx mori (domestic silkworm)	4/274	38/3672	0.314113781510698	0.858333950321618	0.787674880187179	100313947/101746381/100145915/100145916	4
	Metabolism	Xenobiotics biodegradation and metabolism	bmor00982	Drug metabolism - cytochrome P450 - Bombyx mori (domestic silkworm)	6/274	62/3672	0.315456067212218	0.858333950321618	0.787674880187179	692593/692684/100862843/100862815/100862845/692521	6
	Metabolism	Carbohydrate metabolism	bmor00053	Ascorbate and aldarate metabolism - Bombyx mori (domestic silkworm)	5/274	52/3672	0.346457811445318	0.8740754132999	0.802120487238774	692593/692988/100862843/100862815/100862845	5
	Genetic Information Processing	Information processing in viruses	bmor03250	Viral life cycle - HIV-1 - Bombyx mori (domestic silkworm)	3/274	28/3672	0.348324479478038	0.8740754132999	0.802120487238774	101745628/692970/101738908	3
	Metabolism	Carbohydrate metabolism	bmor00630	Glyoxylate and dicarboxylate metabolism - Bombyx mori (domestic silkworm)	4/274	40/3672	0.348986557594742	0.8740754132999	0.802120487238774	101738265/101745043/101738186/692608	4
	Cellular Processes	Cell growth and death	bmor04215	Apoptosis - multiple species - Bombyx mori (domestic silkworm)	2/274	17/3672	0.365789686698313	0.8740754132999	0.802120487238774	100126162/101738358	2
	Metabolism	Xenobiotics biodegradation and metabolism	bmor00983	Drug metabolism - other enzymes - Bombyx mori (domestic silkworm)	8/274	91/3672	0.36820550802868	0.8740754132999	0.802120487238774	101739864/692593/692684/100101186/100862843/100862815/100862845/692521	8
	Organismal Systems	Immune system	bmor04620	Toll-like receptor signaling pathway - Bombyx mori (domestic silkworm)	3/274	29/3672	0.369318957779666	0.8740754132999	0.802120487238774	100126162/101746381/100529234	3
	Metabolism	Xenobiotics biodegradation and metabolism	bmor00980	Metabolism of xenobiotics by cytochrome P450 - Bombyx mori (domestic silkworm)	6/274	67/3672	0.383720862853392	0.8740754132999	0.802120487238774	692593/692684/100862843/100862815/100862845/692521	6
	Metabolism	Amino acid metabolism	bmor00250	Alanine, aspartate and glutamate metabolism - Bombyx mori (domestic silkworm)	3/274	30/3672	0.390191133176008	0.8740754132999	0.802120487238774	101738265/732869/692939	3
	Cellular Processes	Cell motility	bmor04814	Motor proteins - Bombyx mori (domestic silkworm)	9/274	106/3672	0.393902938862953	0.8740754132999	0.802120487238774	692429/733135/101742895/692955/100145915/100145916/692432/692511/692428	9
	NA	NA	bmor04382	Cornified envelope formation - Bombyx mori (domestic silkworm)	4/274	43/3672	0.401306529288423	0.8740754132999	0.802120487238774	101742998/101737820/101741185/101742624	4
	Genetic Information Processing	Folding, sorting and degradation	bmor03018	RNA degradation - Bombyx mori (domestic silkworm)	5/274	56/3672	0.407459896890203	0.8740754132999	0.802120487238774	732955/778529/101745492/100037426/101736615	5
	Metabolism	Amino acid metabolism	bmor00330	Arginine and proline metabolism - Bombyx mori (domestic silkworm)	3/274	31/3672	0.410890151551235	0.8740754132999	0.802120487238774	732869/692924/692988	3
	NA	NA	bmor04981	Folate transport and metabolism - Bombyx mori (domestic silkworm)	2/274	19/3672	0.420129540134639	0.877770646352729	0.805511524318294	100736431/101744514	2
	Metabolism	Lipid metabolism	bmor00062	Fatty acid elongation - Bombyx mori (domestic silkworm)	3/274	32/3672	0.431369808046323	0.885443290200348	0.812552547012465	101742899/101745599/105841738	3
	Metabolism	Lipid metabolism	bmor00100	Steroid biosynthesis - Bombyx mori (domestic silkworm)	2/274	21/3672	0.472004215864825	0.952146435451457	0.873764610130892	101739402/101738979	2
	Metabolism	Amino acid metabolism	bmor00350	Tyrosine metabolism - Bombyx mori (domestic silkworm)	3/274	36/3672	0.510324863298898	0.999293675474521	0.917030633363933	101745777/732869/692890	3
	Metabolism	Glycan biosynthesis and metabolism	bmor00563	Glycosylphosphatidylinositol (GPI)-anchor biosynthesis - Bombyx mori (domestic silkworm)	2/274	23/3672	0.520999266700392	0.999293675474521	0.917030633363933	101737110/733045	2
	Cellular Processes	Transport and catabolism	bmor04136	Autophagy - other - Bombyx mori (domestic silkworm)	2/274	23/3672	0.520999266700392	0.999293675474521	0.917030633363933	101737820/101738071	2
	Environmental Information Processing	Signal transduction	bmor04013	MAPK signaling pathway - fly - Bombyx mori (domestic silkworm)	6/274	78/3672	0.531679851735513	0.999329653775172	0.917063649888147	100126162/101737820/692736/101741316/692854/101746381	6
	Metabolism	Amino acid metabolism	bmor00340	Histidine metabolism - Bombyx mori (domestic silkworm)	1/274	11/3672	0.574399481821455	0.999329653775172	0.917063649888147	692988	1
	Metabolism	Metabolism of cofactors and vitamins	bmor00830	Retinol metabolism - Bombyx mori (domestic silkworm)	4/274	55/3672	0.596288490652517	0.999329653775172	0.917063649888147	692593/100862843/100862815/100862845	4
	Organismal Systems	Environmental adaptation	bmor04711	Circadian rhythm - fly - Bombyx mori (domestic silkworm)	1/274	12/3672	0.606252675479177	0.999329653775172	0.917063649888147	101738787	1
	Metabolism	Metabolism of cofactors and vitamins	bmor00790	Folate biosynthesis - Bombyx mori (domestic silkworm)	2/274	28/3672	0.629588740254263	0.999329653775172	0.917063649888147	101747022/101736565	2
	Cellular Processes	Transport and catabolism	bmor04142	Lysosome - Bombyx mori (domestic silkworm)	8/274	119/3672	0.674318685939972	0.999329653775172	0.917063649888147	100302607/692847/101736893/692390/732926/101747227/101739402/692768	8
	Cellular Processes	Cell growth and death	bmor04214	Apoptosis - fly - Bombyx mori (domestic silkworm)	3/274	46/3672	0.678729292716072	0.999329653775172	0.917063649888147	100126162/101738358/692594	3
	Metabolism	Carbohydrate metabolism	bmor00650	Butanoate metabolism - Bombyx mori (domestic silkworm)	1/274	15/3672	0.688250043929001	0.999329653775172	0.917063649888147	101745599	1
	Environmental Information Processing	Signal transduction	bmor04150	mTOR signaling pathway - Bombyx mori (domestic silkworm)	7/274	107/3672	0.697726057109738	0.999329653775172	0.917063649888147	101743877/101739424/778479/101741790/692985/732913/101742323	7
	Metabolism	Metabolism of terpenoids and polyketides	bmor00981	Insect hormone biosynthesis - Bombyx mori (domestic silkworm)	2/274	32/3672	0.701942210916728	0.999329653775172	0.917063649888147	100036578/692988	2
	NA	NA	bmor03272	Virion - Hepatitis viruses - Bombyx mori (domestic silkworm)	2/274	32/3672	0.701942210916728	0.999329653775172	0.917063649888147	692847/732926	2
	Metabolism	Metabolism of cofactors and vitamins	bmor00760	Nicotinate and nicotinamide metabolism - Bombyx mori (domestic silkworm)	1/274	16/3672	0.711607847583213	0.999329653775172	0.917063649888147	101739592	1
	Metabolism	Metabolism of other amino acids	bmor00410	beta-Alanine metabolism - Bombyx mori (domestic silkworm)	2/274	33/3672	0.718094069351105	0.999329653775172	0.917063649888147	101745599/692988	2
	Metabolism	Lipid metabolism	bmor00561	Glycerolipid metabolism - Bombyx mori (domestic silkworm)	3/274	49/3672	0.720042847911632	0.999329653775172	0.917063649888147	101739608/692988/101736565	3
	Metabolism	Glycan biosynthesis and metabolism	bmor00541	Biosynthesis of various nucleotide sugars - Bombyx mori (domestic silkworm)	1/274	17/3672	0.733221482638519	0.999329653775172	0.917063649888147	101739659	1
	Metabolism	Nucleotide metabolism	bmor00240	Pyrimidine metabolism - Bombyx mori (domestic silkworm)	2/274	34/3672	0.733505662014801	0.999329653775172	0.917063649888147	101739864/100101186	2
	Cellular Processes	Transport and catabolism	bmor04140	Autophagy - animal - Bombyx mori (domestic silkworm)	7/274	111/3672	0.733907687706762	0.999329653775172	0.917063649888147	100126162/101737820/101740181/692779/692390/692768/101738071	7
	Metabolism	Glycan biosynthesis and metabolism	bmor00531	Glycosaminoglycan degradation - Bombyx mori (domestic silkworm)	1/274	18/3672	0.753220747688327	0.999329653775172	0.917063649888147	100302607	1
	Metabolism	Metabolism of cofactors and vitamins	bmor00770	Pantothenate and CoA biosynthesis - Bombyx mori (domestic silkworm)	1/274	18/3672	0.753220747688327	0.999329653775172	0.917063649888147	692988	1
	Cellular Processes	Transport and catabolism	bmor04148	Efferocytosis - Bombyx mori (domestic silkworm)	4/274	69/3672	0.768833186810257	0.999329653775172	0.917063649888147	100134921/100302733/101746381/101739402	4
	Metabolism	Global and overview maps	bmor01212	Fatty acid metabolism - Bombyx mori (domestic silkworm)	5/274	85/3672	0.772138760802119	0.999329653775172	0.917063649888147	101746258/101742899/101743452/101745599/105841738	5
	Genetic Information Processing	Folding, sorting and degradation	bmor03050	Proteasome - Bombyx mori (domestic silkworm)	2/274	39/3672	0.800196963589333	0.999329653775172	0.917063649888147	100101166/101740220	2
	Genetic Information Processing	Folding, sorting and degradation	bmor04130	SNARE interactions in vesicular transport - Bombyx mori (domestic silkworm)	1/274	21/3672	0.804690127156305	0.999329653775172	0.917063649888147	101742448	1
	Environmental Information Processing	Membrane transport	bmor02010	ABC transporters - Bombyx mori (domestic silkworm)	2/274	40/3672	0.811619481267456	0.999329653775172	0.917063649888147	100736431/101744514	2
	Metabolism	Global and overview maps	bmor01232	Nucleotide metabolism - Bombyx mori (domestic silkworm)	3/274	59/3672	0.828325459833949	0.999329653775172	0.917063649888147	101739864/100329147/100101186	3
	Genetic Information Processing	Transcription	bmor03040	Spliceosome - Bombyx mori (domestic silkworm)	12/274	201/3672	0.832702327522264	0.999329653775172	0.917063649888147	732955/101738204/733079/692436/101746688/692972/101742757/101736447/101736232/101740781/732985/101735548	12
	Environmental Information Processing	Signal transduction	bmor04310	Wnt signaling pathway - Bombyx mori (domestic silkworm)	4/274	77/3672	0.83811146171614	0.999329653775172	0.917063649888147	100126162/692538/101746381/100174824	4
	Environmental Information Processing	Signal transduction	bmor04068	FoxO signaling pathway - Bombyx mori (domestic silkworm)	4/274	78/3672	0.845418728591881	0.999329653775172	0.917063649888147	100126162/692736/101741790/733130	4
	Metabolism	Carbohydrate metabolism	bmor00500	Starch and sucrose metabolism - Bombyx mori (domestic silkworm)	1/274	24/3672	0.845455728295575	0.999329653775172	0.917063649888147	778462	1
	Environmental Information Processing	Signal transduction	bmor04330	Notch signaling pathway - Bombyx mori (domestic silkworm)	1/274	25/3672	0.857063494317234	0.999329653775172	0.917063649888147	692897	1
	Metabolism	Glycan biosynthesis and metabolism	bmor00511	Other glycan degradation - Bombyx mori (domestic silkworm)	1/274	26/3672	0.867802348870861	0.999329653775172	0.917063649888147	100302607	1
	Environmental Information Processing	Signal transduction	bmor04070	Phosphatidylinositol signaling system - Bombyx mori (domestic silkworm)	2/274	47/3672	0.876494406010082	0.999329653775172	0.917063649888147	105842530/692927	2
	Metabolism	Global and overview maps	bmor01250	Biosynthesis of nucleotide sugars - Bombyx mori (domestic silkworm)	1/274	27/3672	0.877737114753852	0.999329653775172	0.917063649888147	778462	1
	Organismal Systems	Immune system	bmor04624	Toll and Imd signaling pathway - Bombyx mori (domestic silkworm)	3/274	67/3672	0.887128436101724	0.999329653775172	0.917063649888147	100126162/101738894/692372	3
	Metabolism	Lipid metabolism	bmor01040	Biosynthesis of unsaturated fatty acids - Bombyx mori (domestic silkworm)	2/274	51/3672	0.903641161679734	0.999329653775172	0.917063649888147	101742899/101743452	2
	Genetic Information Processing	Translation	bmor03015	mRNA surveillance pathway - Bombyx mori (domestic silkworm)	3/274	70/3672	0.904078391721823	0.999329653775172	0.917063649888147	101737820/778529/101739989	3
	Genetic Information Processing	Replication and repair	bmor03440	Homologous recombination - Bombyx mori (domestic silkworm)	1/274	31/3672	0.910570382360759	0.999329653775172	0.917063649888147	692385	1
	Metabolism	Metabolism of other amino acids	bmor00480	Glutathione metabolism - Bombyx mori (domestic silkworm)	2/274	55/3672	0.925146753762313	0.999329653775172	0.917063649888147	692684/692521	2
	Genetic Information Processing	Replication and repair	bmor03030	DNA replication - Bombyx mori (domestic silkworm)	1/274	34/3672	0.929283696292075	0.999329653775172	0.917063649888147	101735774	1
	Genetic Information Processing	Replication and repair	bmor03460	Fanconi anemia pathway - Bombyx mori (domestic silkworm)	1/274	34/3672	0.929283696292075	0.999329653775172	0.917063649888147	101736682	1
	Genetic Information Processing	Transcription	bmor03022	Basal transcription factors - Bombyx mori (domestic silkworm)	1/274	35/3672	0.93460977304193	0.999329653775172	0.917063649888147	101743500	1
	Metabolism	Carbohydrate metabolism	bmor00520	Amino sugar and nucleotide sugar metabolism - Bombyx mori (domestic silkworm)	1/274	36/3672	0.939536064542208	0.999329653775172	0.917063649888147	778462	1
	Genetic Information Processing	Chromosome	bmor03083	Polycomb repressive complex - Bombyx mori (domestic silkworm)	1/274	38/3672	0.948306689853598	0.999329653775172	0.917063649888147	692538	1
	Organismal Systems	Aging	bmor04213	Longevity regulating pathway - multiple species - Bombyx mori (domestic silkworm)	3/274	81/3672	0.94832185895898	0.999329653775172	0.917063649888147	692736/101742383/692436	3
	Metabolism	Lipid metabolism	bmor00600	Sphingolipid metabolism - Bombyx mori (domestic silkworm)	1/274	39/3672	0.952204314228973	0.999329653775172	0.917063649888147	100302607	1
	Metabolism	Carbohydrate metabolism	bmor00562	Inositol phosphate metabolism - Bombyx mori (domestic silkworm)	1/274	43/3672	0.965077238772801	0.999329653775172	0.917063649888147	105842530	1
	NA	NA	bmor04082	Neuroactive ligand signaling - Bombyx mori (domestic silkworm)	2/274	71/3672	0.973687706089658	0.999329653775172	0.917063649888147	100856802/101740811	2
	Environmental Information Processing	Signal transduction	bmor04350	TGF-beta signaling pathway - Bombyx mori (domestic silkworm)	1/274	47/3672	0.974492251937511	0.999329653775172	0.917063649888147	101737820	1
	Metabolism	Nucleotide metabolism	bmor00230	Purine metabolism - Bombyx mori (domestic silkworm)	3/274	94/3672	0.976033140262137	0.999329653775172	0.917063649888147	101739864/100329147/100101186	3
	Cellular Processes	Transport and catabolism	bmor04144	Endocytosis - Bombyx mori (domestic silkworm)	4/274	117/3672	0.979570145199826	0.999329653775172	0.917063649888147	101742296/692436/101738908/101740777	4
	Genetic Information Processing	Replication and repair	bmor03420	Nucleotide excision repair - Bombyx mori (domestic silkworm)	1/274	51/3672	0.981375742368303	0.999329653775172	0.917063649888147	101741946	1
	Cellular Processes	Transport and catabolism	bmor04146	Peroxisome - Bombyx mori (domestic silkworm)	3/274	109/3672	0.990515592566982	0.999329653775172	0.917063649888147	692736/101745831/692638	3
	Metabolism	Lipid metabolism	bmor00564	Glycerophospholipid metabolism - Bombyx mori (domestic silkworm)	1/274	72/3672	0.996448761329569	0.999329653775172	0.917063649888147	101739608	1
	NA	NA	bmor04081	Hormone signaling - Bombyx mori (domestic silkworm)	1/274	73/3672	0.996719050050596	0.999329653775172	0.917063649888147	101740811	1
	Genetic Information Processing	Translation	bmor03008	Ribosome biogenesis in eukaryotes - Bombyx mori (domestic silkworm)	5/274	188/3672	0.998931211005016	0.999329653775172	0.917063649888147	101741801/101742458/692970/692972/692538	5
	Environmental Information Processing	Signaling molecules and interaction	bmor04080	Neuroactive ligand-receptor interaction - Bombyx mori (domestic silkworm)	1/274	93/3672	0.999329653775172	0.999329653775172	0.917063649888147	692746	1
down-regulated	Genetic Information Processing	Folding, sorting and degradation	bmor04141	Protein processing in endoplasmic reticulum - Bombyx mori (domestic silkworm)	26/351	128/3672	0.000131458275376247	0.0153806182190209	0.0138377131974997	101740377/692539/101746557/692990/101735890/100101162/101740210/100529210/101745384/101736274/100862753/100302620/101738074/101746780/101738189/101737157/101745295/101746338/100302619/101736558/692533/692420/733093/692488/692487/778499	26
	Cellular Processes	Transport and catabolism	bmor04144	Endocytosis - Bombyx mori (domestic silkworm)	23/351	117/3672	0.000529059948093095	0.0211053674943988	0.0189881848802508	101742319/101738552/101738677/101737319/101742207/101745374/101739513/101740393/101742750/101736454/101741262/100144600/101737965/101744291/101746390/732902/101741967/100272227/101740542/101737683/101744693/733093/733063	23
	Genetic Information Processing	Folding, sorting and degradation	bmor04120	Ubiquitin mediated proteolysis - Bombyx mori (domestic silkworm)	19/351	90/3672	0.000644907642313586	0.0211053674943988	0.0189881848802508	100141465/101739053/101735782/101743894/101744303/101736301/101735478/101742453/101743548/101736311/100272227/101746780/101740542/101739884/101742698/101745295/101741088/100529214/692576	19
	Environmental Information Processing	Signal transduction	bmor04310	Wnt signaling pathway - Bombyx mori (domestic silkworm)	17/351	77/3672	0.000721551025449531	0.0211053674943988	0.0189881848802508	101738552/692526/101737550/692577/101744450/101736301/101740097/100329153/101744944/101745556/692728/101743676/100462731/101743371/101739954/101742450/101738442	17
	Environmental Information Processing	Signal transduction	bmor04070	Phosphatidylinositol signaling system - Bombyx mori (domestic silkworm)	12/351	47/3672	0.00114585296862247	0.0242222789282313	0.0217924236871177	100329155/101746568/692526/101746775/101741278/100329153/101742216/101745288/101744653/101745335/101739169/101743221	12
	Cellular Processes	Transport and catabolism	bmor04140	Autophagy - animal - Bombyx mori (domestic silkworm)	21/351	111/3672	0.00153934708041806	0.0242222789282313	0.0217924236871177	101742407/101740431/100431180/100431179/101743043/101741278/101741938/101746532/101736697/732902/101742921/101745914/100463495/101745506/100141438/101742698/100145906/101741647/101743947/101747035/101739525	21
	Environmental Information Processing	Signal transduction	bmor04330	Notch signaling pathway - Bombyx mori (domestic silkworm)	8/351	25/3672	0.00162017537483023	0.0242222789282313	0.0217924236871177	101736421/101742356/101745094/101744944/101744564/101743676/101742770/101739954	8
	Cellular Processes	Transport and catabolism	bmor04137	Mitophagy - animal - Bombyx mori (domestic silkworm)	13/351	56/3672	0.00186325222524856	0.0242222789282313	0.0217924236871177	101740431/101743043/101737843/101736301/101741938/732902/100272227/101736506/101737157/101741924/101742698/101739525/101736006	13
	Environmental Information Processing	Signal transduction	bmor04391	Hippo signaling pathway - fly - Bombyx mori (domestic silkworm)	13/351	56/3672	0.00186325222524856	0.0242222789282313	0.0217924236871177	101745221/100144579/101745685/101741262/101744950/101743174/101747103/101745387/692728/101742023/101745665/101740520/101740701	13
	Organismal Systems	Environmental adaptation	bmor04711	Circadian rhythm - fly - Bombyx mori (domestic silkworm)	5/351	12/3672	0.00348594779717248	0.0372223915186683	0.0334884314158059	692522/733065/101743989/692728/101746519	5
	Organismal Systems	Aging	bmor04213	Longevity regulating pathway - multiple species - Bombyx mori (domestic silkworm)	16/351	81/3672	0.00349954108295172	0.0372223915186683	0.0334884314158059	101739615/100431180/100431179/101744333/101741278/101739269/101736445/101744252/100463495/100141438/692754/692533/733093/692488/692487/778499	16
	Environmental Information Processing	Signal transduction	bmor04013	MAPK signaling pathway - fly - Bombyx mori (domestic silkworm)	15/351	78/3672	0.00602358509994203	0.0587299547244348	0.0528384657889652	101746155/101743924/101742601/101744813/101736301/100529210/101740002/101737822/100862753/101735877/101740276/100862655/101743676/101743695/101740492	15
	Metabolism	Amino acid metabolism	bmor00310	Lysine degradation - Bombyx mori (domestic silkworm)	9/351	39/3672	0.00954691248676022	0.085922212380842	0.0773029351154674	100141463/101738271/101736339/101742231/101736107/101738260/101737263/101737053/101747197	9
	Metabolism	Carbohydrate metabolism	bmor00562	Inositol phosphate metabolism - Bombyx mori (domestic silkworm)	9/351	43/3672	0.018075546643915	0.151059925524147	0.135906365743722	100329155/101746568/101741278/100329153/101742216/101744653/101737113/101739169/101743221	9
	Human Diseases	Infectious disease: bacterial	bmor05100	Bacterial invasion of epithelial cells - Bombyx mori (domestic silkworm)	8/351	38/3672	0.0244057570305463	0.190364904838261	0.171268470389798	101742319/101738677/101743527/101744450/101741278/101741145/101744627/101736001	8
	Environmental Information Processing	Signal transduction	bmor04392	Hippo signaling pathway - multiple species - Bombyx mori (domestic silkworm)	4/351	13/3672	0.0292311830040434	0.213753025717067	0.192310414500285	100144579/101744950/101747103/692728	4
	Genetic Information Processing	Information processing in viruses	bmor03250	Viral life cycle - HIV-1 - Bombyx mori (domestic silkworm)	6/351	28/3672	0.0450822918567861	0.310272243955528	0.279147317998676	101746595/101742207/101740002/101744944/101744401/101740554	6
	Organismal Systems	Immune system	bmor04620	Toll-like receptor signaling pathway - Bombyx mori (domestic silkworm)	6/351	29/3672	0.0524552193392775	0.340958925705304	0.306755668650746	101743924/101741278/100862753/101735877/100141438/100529236	6
	Genetic Information Processing	Chromosome	bmor03083	Polycomb repressive complex - Bombyx mori (domestic silkworm)	7/351	38/3672	0.0649136648115804	0.399731514892364	0.359632492030916	100529124/101740295/101745326/100529123/101744944/100529125/100529122	7
	Environmental Information Processing	Signal transduction	bmor04341	Hedgehog signaling pathway - fly - Bombyx mori (domestic silkworm)	6/351	31/3672	0.0692819758118086	0.400481228759454	0.360306998434057	101745289/692728/100272227/101746020/101746466/692674	6
	Cellular Processes	Cell growth and death	bmor04215	Apoptosis - multiple species - Bombyx mori (domestic silkworm)	4/351	17/3672	0.0718812461875943	0.400481228759454	0.360306998434057	100529236/100529214/692576/100533207	4
	Environmental Information Processing	Membrane transport	bmor02010	ABC transporters - Bombyx mori (domestic silkworm)	7/351	40/3672	0.0815191393869124	0.433533604921307	0.390043729123983	101736039/101745183/101746706/101741720/101740098/101736702/101735894	7
	Metabolism	Nucleotide metabolism	bmor00240	Pyrimidine metabolism - Bombyx mori (domestic silkworm)	6/351	34/3672	0.0997076236341538	0.507208346312869	0.456327796952649	100873153/101744022/101736970/101741300/101744387/101742594	6
	Cellular Processes	Transport and catabolism	bmor04148	Efferocytosis - Bombyx mori (domestic silkworm)	10/351	69/3672	0.117989937663901	0.554955678228583	0.499285360529539	101737109/101741199/100526764/101737822/101746988/732902/101746320/732996/100462731/101739525	10
	Environmental Information Processing	Signal transduction	bmor04068	FoxO signaling pathway - Bombyx mori (domestic silkworm)	11/351	78/3672	0.120678225252934	0.554955678228583	0.499285360529539	101738552/101744333/101737550/101741278/101741938/101739346/101746293/101744944/692728/100141438/100145906	11
	Metabolism	Carbohydrate metabolism	bmor00520	Amino sugar and nucleotide sugar metabolism - Bombyx mori (domestic silkworm)	6/351	36/3672	0.123323484050796	0.554955678228583	0.499285360529539	101746744/693032/101746460/101740507/101746316/101745054	6
	Metabolism	Glycan biosynthesis and metabolism	bmor00514	Other types of O-glycan biosynthesis - Bombyx mori (domestic silkworm)	4/351	21/3672	0.134229981967673	0.581663255193248	0.523313769854474	100141463/101736677/101735893/101744145	4
	Cellular Processes	Cell growth and death	bmor04214	Apoptosis - fly - Bombyx mori (domestic silkworm)	7/351	46/3672	0.14444093710416	0.603556772899525	0.543011041744961	101743924/101743323/101737843/100529210/100862753/101737038/100533207	7
	NA	NA	bmor04081	Hormone signaling - Bombyx mori (domestic silkworm)	10/351	73/3672	0.154646415288921	0.616403304265301	0.554568874732614	101739615/100862775/101741278/100329153/101739269/692605/101744252/101746320/100145906/733012	10
	Cellular Processes	Transport and catabolism	bmor04142	Lysosome - Bombyx mori (domestic silkworm)	15/351	119/3672	0.160239507341478	0.616403304265301	0.554568874732614	101739036/732966/101741883/101742516/101743490/101742239/101736903/693032/778463/101740461/101742786/101742059/692859/101741318/101744899	15
	Genetic Information Processing	Folding, sorting and degradation	bmor03050	Proteasome - Bombyx mori (domestic silkworm)	6/351	39/3672	0.163320533608755	0.616403304265301	0.554568874732614	733131/101746211/101735320/692900/101745357/692836	6
	Cellular Processes	Transport and catabolism	bmor04136	Autophagy - other - Bombyx mori (domestic silkworm)	4/351	23/3672	0.171489236068361	0.627007519374945	0.56410932917224	101740431/100431180/100431179/100463495	4
	Metabolism	Metabolism of cofactors and vitamins	bmor00760	Nicotinate and nicotinamide metabolism - Bombyx mori (domestic silkworm)	3/351	16/3672	0.191831215013403	0.660189184811064	0.593962379497133	101735515/101744387/692483	3
	Genetic Information Processing	Chromosome	bmor03082	ATP-dependent chromatin remodeling - Bombyx mori (domestic silkworm)	9/351	68/3672	0.197371995129136	0.660189184811064	0.593962379497133	101745407/101735441/101741800/101737615/101744024/101744798/101740505/101739754/100529122	9
	Metabolism	Global and overview maps	bmor01232	Nucleotide metabolism - Bombyx mori (domestic silkworm)	8/351	59/3672	0.197492491182797	0.660189184811064	0.593962379497133	692855/100873153/101744022/101736970/101740233/101741300/101744387/101746046	8
	Environmental Information Processing	Signal transduction	bmor04150	mTOR signaling pathway - Bombyx mori (domestic silkworm)	13/351	107/3672	0.218638065397231	0.710573712541002	0.639292588880794	100431180/100431179/101746912/692526/101736611/101739189/101741278/101740097/101742921/100463495/101745506/100141438/100145906	13
	Metabolism	Glycan biosynthesis and metabolism	bmor00511	Other glycan degradation - Bombyx mori (domestic silkworm)	4/351	26/3672	0.23294191965687	0.736600124320373	0.662708164030925	101743490/693032/101742786/101742100	4
	Metabolism	Global and overview maps	bmor01250	Biosynthesis of nucleotide sugars - Bombyx mori (domestic silkworm)	4/351	27/3672	0.254520282417877	0.783654553760305	0.705042333567526	101746744/101740507/101746316/101745054	4
	Metabolism	Nucleotide metabolism	bmor00230	Purine metabolism - Bombyx mori (domestic silkworm)	11/351	94/3672	0.284195428038131	0.852586284114392	0.767059184988207	101739615/692855/100873153/101742215/101739269/101740233/101744252/101741300/101735940/101744387/101746046	11
	Cellular Processes	Cell motility	bmor04814	Motor proteins - Bombyx mori (domestic silkworm)	12/351	106/3672	0.311414049261856	0.898599110118242	0.80845623942262	101736113/101737161/101741495/101738943/101743647/101743085/100144600/101745193/101738291/101746355/101742699/101739780	12
	Genetic Information Processing	Translation	bmor00970	Aminoacyl-tRNA biosynthesis - Bombyx mori (domestic silkworm)	5/351	39/3672	0.31489370525511	0.898599110118242	0.80845623942262	101737924/693023/101737111/101741861/101740812	5
	Metabolism	Lipid metabolism	bmor00565	Ether lipid metabolism - Bombyx mori (domestic silkworm)	4/351	31/3672	0.343783268421511	0.957681962031351	0.861612201557671	101736689/101746390/101747123/101746631	4
	Metabolism	Lipid metabolism	bmor00564	Glycerophospholipid metabolism - Bombyx mori (domestic silkworm)	8/351	72/3672	0.382396572069197	0.999999978687771	0.899685091037131	101746390/101745288/101747123/101741580/101746631/101744653/101745335/101736679	8
	Metabolism	Glycan biosynthesis and metabolism	bmor00534	Glycosaminoglycan biosynthesis - heparan sulfate / heparin - Bombyx mori (domestic silkworm)	2/351	14/3672	0.392706902777643	0.999999978687771	0.899685091037131	101739145/101741346	2
	Metabolism	Metabolism of other amino acids	bmor00480	Glutathione metabolism - Bombyx mori (domestic silkworm)	6/351	55/3672	0.431492407457258	0.999999978687771	0.899685091037131	692543/100873153/101742094/101743790/732996/101745237	6
	Organismal Systems	Sensory system	bmor04745	Phototransduction - fly - Bombyx mori (domestic silkworm)	3/351	25/3672	0.43293289494561	0.999999978687771	0.899685091037131	692526/100329153/100462731	3
	Genetic Information Processing	Transcription	bmor03022	Basal transcription factors - Bombyx mori (domestic silkworm)	4/351	35/3672	0.433731867316897	0.999999978687771	0.899685091037131	101745832/101745755/101745944/101745815	4
	Cellular Processes	Transport and catabolism	bmor04145	Phagosome - Bombyx mori (domestic silkworm)	8/351	77/3672	0.457864450808176	0.999999978687771	0.899685091037131	101742407/101737161/732966/101742516/778463/101736274/732902/692859	8
	Environmental Information Processing	Signal transduction	bmor04350	TGF-beta signaling pathway - Bombyx mori (domestic silkworm)	5/351	47/3672	0.471680655075078	0.999999978687771	0.899685091037131	101745746/101738552/100529202/101744944/100272227	5
	Metabolism	Glycan biosynthesis and metabolism	bmor00531	Glycosaminoglycan degradation - Bombyx mori (domestic silkworm)	2/351	18/3672	0.524776395665646	0.999999978687771	0.899685091037131	693032/101742059	2
	Metabolism	Metabolism of cofactors and vitamins	bmor00770	Pantothenate and CoA biosynthesis - Bombyx mori (domestic silkworm)	2/351	18/3672	0.524776395665646	0.999999978687771	0.899685091037131	101746479/101742594	2
	NA	NA	bmor04082	Neuroactive ligand signaling - Bombyx mori (domestic silkworm)	7/351	71/3672	0.52522181513807	0.999999978687771	0.899685091037131	101739615/692526/100329153/101739269/101744252/101745328/733012	7
	Genetic Information Processing	Replication and repair	bmor03420	Nucleotide excision repair - Bombyx mori (domestic silkworm)	5/351	51/3672	0.546269739420129	0.999999978687771	0.899685091037131	101746067/101739752/101745944/692837/101745815	5
	Metabolism	Amino acid metabolism	bmor00330	Arginine and proline metabolism - Bombyx mori (domestic silkworm)	3/351	31/3672	0.580405962988297	0.999999978687771	0.899685091037131	101742094/101742434/732996	3
	Metabolism	Lipid metabolism	bmor00062	Fatty acid elongation - Bombyx mori (domestic silkworm)	3/351	32/3672	0.602544591061537	0.999999978687771	0.899685091037131	101739036/101736903/101744618	3
	Genetic Information Processing	Folding, sorting and degradation	bmor04130	SNARE interactions in vesicular transport - Bombyx mori (domestic silkworm)	2/351	21/3672	0.610367508955767	0.999999978687771	0.899685091037131	101742407/101747035	2
	Genetic Information Processing	Folding, sorting and degradation	bmor03018	RNA degradation - Bombyx mori (domestic silkworm)	5/351	56/3672	0.631817186231882	0.999999978687771	0.899685091037131	101745129/101738383/101743557/101744020/101746473	5
	Metabolism	Carbohydrate metabolism	bmor00051	Fructose and mannose metabolism - Bombyx mori (domestic silkworm)	2/351	22/3672	0.636165861372114	0.999999978687771	0.899685091037131	101738115/101745054	2
	Metabolism	Carbohydrate metabolism	bmor00052	Galactose metabolism - Bombyx mori (domestic silkworm)	2/351	22/3672	0.636165861372114	0.999999978687771	0.899685091037131	101746316/101745054	2
	Organismal Systems	Development and regeneration	bmor04320	Dorso-ventral axis formation - Bombyx mori (domestic silkworm)	2/351	22/3672	0.636165861372114	0.999999978687771	0.899685091037131	101741218/733133	2
	Genetic Information Processing	Translation	bmor03013	Nucleocytoplasmic transport - Bombyx mori (domestic silkworm)	7/351	80/3672	0.655061742619362	0.999999978687771	0.899685091037131	101746595/101735669/101740002/101744401/101737898/101735812/101737801	7
	Genetic Information Processing	Translation	bmor03015	mRNA surveillance pathway - Bombyx mori (domestic silkworm)	6/351	70/3672	0.672198581908311	0.999999978687771	0.899685091037131	101737436/101739213/732981/733078/101735812/101740520	6
	Metabolism	Carbohydrate metabolism	bmor00500	Starch and sucrose metabolism - Bombyx mori (domestic silkworm)	2/351	24/3672	0.683718139717425	0.999999978687771	0.899685091037131	101745054/692454	2
	NA	NA	bmor04820	Cytoskeleton in muscle cells - Bombyx mori (domestic silkworm)	6/351	71/3672	0.685765668071718	0.999999978687771	0.899685091037131	101737442/101743475/101743323/101735742/101746046/101736001	6
	Metabolism	Amino acid metabolism	bmor00270	Cysteine and methionine metabolism - Bombyx mori (domestic silkworm)	3/351	38/3672	0.718652607872078	0.999999978687771	0.899685091037131	101742094/101745237/101742616	3
	Metabolism	Lipid metabolism	bmor00600	Sphingolipid metabolism - Bombyx mori (domestic silkworm)	3/351	39/3672	0.735206380318045	0.999999978687771	0.899685091037131	101741167/693032/101742786	3
	Metabolism	Metabolism of cofactors and vitamins	bmor00130	Ubiquinone and other terpenoid-quinone biosynthesis - Bombyx mori (domestic silkworm)	2/351	27/3672	0.745386737642928	0.999999978687771	0.899685091037131	101746908/101747041	2
	Metabolism	Carbohydrate metabolism	bmor00650	Butanoate metabolism - Bombyx mori (domestic silkworm)	1/351	15/3672	0.779109587119097	0.999999978687771	0.899685091037131	101737459	1
	Metabolism	Energy metabolism	bmor00910	Nitrogen metabolism - Bombyx mori (domestic silkworm)	1/351	15/3672	0.779109587119097	0.999999978687771	0.899685091037131	692876	1
	Organismal Systems	Immune system	bmor04624	Toll and Imd signaling pathway - Bombyx mori (domestic silkworm)	5/351	67/3672	0.781890046907795	0.999999978687771	0.899685091037131	101743924/692440/100862753/100529236/100529214	5
	NA	NA	bmor04382	Cornified envelope formation - Bombyx mori (domestic silkworm)	3/351	43/3672	0.793823590407279	0.999999978687771	0.899685091037131	101746772/101742786/101740520	3
	Genetic Information Processing	Transcription	bmor03020	RNA polymerase - Bombyx mori (domestic silkworm)	2/351	30/3672	0.796469887530795	0.999999978687771	0.899685091037131	101746067/692837	2
	Genetic Information Processing	Replication and repair	bmor03410	Base excision repair - Bombyx mori (domestic silkworm)	2/351	30/3672	0.796469887530795	0.999999978687771	0.899685091037131	101739679/101735453	2
	Metabolism	Glycan biosynthesis and metabolism	bmor00513	Various types of N-glycan biosynthesis - Bombyx mori (domestic silkworm)	3/351	44/3672	0.806672093652476	0.999999978687771	0.899685091037131	693032/101738068/101742100	3
	Metabolism	Glycan biosynthesis and metabolism	bmor00541	Biosynthesis of various nucleotide sugars - Bombyx mori (domestic silkworm)	1/351	17/3672	0.819482199766986	0.999999978687771	0.899685091037131	101746744	1
	Genetic Information Processing	Replication and repair	bmor03430	Mismatch repair - Bombyx mori (domestic silkworm)	1/351	18/3672	0.836817835302359	0.999999978687771	0.899685091037131	101741887	1
	Metabolism	Metabolism of other amino acids	bmor00410	beta-Alanine metabolism - Bombyx mori (domestic silkworm)	2/351	33/3672	0.838285574046141	0.999999978687771	0.899685091037131	101737113/101742594	2
	Genetic Information Processing	Replication and repair	bmor03460	Fanconi anemia pathway - Bombyx mori (domestic silkworm)	2/351	34/3672	0.850399542316671	0.999999978687771	0.899685091037131	101735478/100620066	2
	NA	NA	bmor04981	Folate transport and metabolism - Bombyx mori (domestic silkworm)	1/351	19/3672	0.852492969349669	0.999999978687771	0.899685091037131	101746706	1
	Metabolism	Lipid metabolism	bmor00561	Glycerolipid metabolism - Bombyx mori (domestic silkworm)	3/351	49/3672	0.861201338240911	0.999999978687771	0.899685091037131	101745288/101741580/101745335	3
	Metabolism	Amino acid metabolism	bmor00350	Tyrosine metabolism - Bombyx mori (domestic silkworm)	2/351	36/3672	0.872184259237761	0.999999978687771	0.899685091037131	693082/101747176	2
	Metabolism	Xenobiotics biodegradation and metabolism	bmor00983	Drug metabolism - other enzymes - Bombyx mori (domestic silkworm)	6/351	91/3672	0.880411819539393	0.999999978687771	0.899685091037131	100873153/101744022/101736970/101740233/101743790/101742594	6
	Metabolism	Amino acid metabolism	bmor00260	Glycine, serine and threonine metabolism - Bombyx mori (domestic silkworm)	2/351	37/3672	0.881948545624391	0.999999978687771	0.899685091037131	693077/101742616	2
	Metabolism	Lipid metabolism	bmor00592	alpha-Linolenic acid metabolism - Bombyx mori (domestic silkworm)	1/351	22/3672	0.891067623165304	0.999999978687771	0.899685091037131	101746631	1
	Metabolism	Glycan biosynthesis and metabolism	bmor00563	Glycosylphosphatidylinositol (GPI)-anchor biosynthesis - Bombyx mori (domestic silkworm)	1/351	23/3672	0.901543038033517	0.999999978687771	0.899685091037131	101741111	1
	Metabolism	Amino acid metabolism	bmor00280	Valine, leucine and isoleucine degradation - Bombyx mori (domestic silkworm)	2/351	40/3672	0.907256579413126	0.999999978687771	0.899685091037131	101737113/101737459	2
	Environmental Information Processing	Signaling molecules and interaction	bmor04512	ECM-receptor interaction - Bombyx mori (domestic silkworm)	1/351	24/3672	0.91101368578639	0.999999978687771	0.899685091037131	101743808	1
	Metabolism	Lipid metabolism	bmor00590	Arachidonic acid metabolism - Bombyx mori (domestic silkworm)	3/351	56/3672	0.914766072516636	0.999999978687771	0.899685091037131	692543/101746631/101745595	3
	Organismal Systems	Digestive system	bmor04977	Vitamin digestion and absorption - Bombyx mori (domestic silkworm)	1/351	25/3672	0.919575691348062	0.999999978687771	0.899685091037131	101746706	1
	Metabolism	Metabolism of cofactors and vitamins	bmor00670	One carbon pool by folate - Bombyx mori (domestic silkworm)	1/351	26/3672	0.927316007316482	0.999999978687771	0.899685091037131	101742616	1
	Metabolism	Metabolism of terpenoids and polyketides	bmor00900	Terpenoid backbone biosynthesis - Bombyx mori (domestic silkworm)	1/351	26/3672	0.927316007316482	0.999999978687771	0.899685091037131	692501	1
	Metabolism	Carbohydrate metabolism	bmor00640	Propanoate metabolism - Bombyx mori (domestic silkworm)	1/351	27/3672	0.934313286919311	0.999999978687771	0.899685091037131	101737113	1
	Metabolism	Metabolism of cofactors and vitamins	bmor00790	Folate biosynthesis - Bombyx mori (domestic silkworm)	1/351	28/3672	0.940638674104859	0.999999978687771	0.899685091037131	101745478	1
	Genetic Information Processing	Folding, sorting and degradation	bmor03060	Protein export - Bombyx mori (domestic silkworm)	1/351	28/3672	0.940638674104859	0.999999978687771	0.899685091037131	101746557	1
	Genetic Information Processing	Replication and repair	bmor03440	Homologous recombination - Bombyx mori (domestic silkworm)	1/351	31/3672	0.956196828976491	0.999999978687771	0.899685091037131	101735478	1
	NA	NA	bmor03272	Virion - Hepatitis viruses - Bombyx mori (domestic silkworm)	1/351	32/3672	0.960419546095209	0.999999978687771	0.899685091037131	101742207	1
	Genetic Information Processing	Replication and repair	bmor03030	DNA replication - Bombyx mori (domestic silkworm)	1/351	34/3672	0.967685829400684	0.999999978687771	0.899685091037131	101743127	1
	Metabolism	Global and overview maps	bmor01212	Fatty acid metabolism - Bombyx mori (domestic silkworm)	4/351	85/3672	0.968865508120964	0.999999978687771	0.899685091037131	101737109/101739036/101736903/101744618	4
	Metabolism	Carbohydrate metabolism	bmor00020	Citrate cycle (TCA cycle) - Bombyx mori (domestic silkworm)	1/351	36/3672	0.9736212458143	0.999999978687771	0.899685091037131	101740956	1
	Metabolism	Lipid metabolism	bmor00071	Fatty acid degradation - Bombyx mori (domestic silkworm)	1/351	36/3672	0.9736212458143	0.999999978687771	0.899685091037131	101737109	1
	Metabolism	Global and overview maps	bmor01210	2-Oxocarboxylic acid metabolism - Bombyx mori (domestic silkworm)	1/351	36/3672	0.9736212458143	0.999999978687771	0.899685091037131	101740956	1
	Metabolism	Carbohydrate metabolism	bmor00630	Glyoxylate and dicarboxylate metabolism - Bombyx mori (domestic silkworm)	1/351	40/3672	0.98242790056771	0.999999978687771	0.899685091037131	101740956	1
	Metabolism	Xenobiotics biodegradation and metabolism	bmor00982	Drug metabolism - cytochrome P450 - Bombyx mori (domestic silkworm)	2/351	62/3672	0.985681769076485	0.999999978687771	0.899685091037131	692543/101743790	2
	Metabolism	Carbohydrate metabolism	bmor00010	Glycolysis / Gluconeogenesis - Bombyx mori (domestic silkworm)	1/351	46/3672	0.990454604871602	0.999999978687771	0.899685091037131	101745054	1
	Metabolism	Xenobiotics biodegradation and metabolism	bmor00980	Metabolism of xenobiotics by cytochrome P450 - Bombyx mori (domestic silkworm)	2/351	67/3672	0.990802477122785	0.999999978687771	0.899685091037131	692543/101743790	2
	Metabolism	Global and overview maps	bmor01230	Biosynthesis of amino acids - Bombyx mori (domestic silkworm)	2/351	69/3672	0.992305882251012	0.999999978687771	0.899685091037131	101740956/101742616	2
	Metabolism	Lipid metabolism	bmor01040	Biosynthesis of unsaturated fatty acids - Bombyx mori (domestic silkworm)	1/351	51/3672	0.99426434587005	0.999999978687771	0.899685091037131	101744618	1
	Metabolism	Metabolism of cofactors and vitamins	bmor00860	Porphyrin metabolism - Bombyx mori (domestic silkworm)	1/351	55/3672	0.996185983484325	0.999999978687771	0.899685091037131	732916	1
	Metabolism	Carbohydrate metabolism	bmor00040	Pentose and glucuronate interconversions - Bombyx mori (domestic silkworm)	1/351	57/3672	0.996890396583585	0.999999978687771	0.899685091037131	101737103	1
	Metabolism	Energy metabolism	bmor00190	Oxidative phosphorylation - Bombyx mori (domestic silkworm)	4/351	131/3672	0.99910148016942	0.999999978687771	0.899685091037131	732966/101742516/778463/692859	4
	Environmental Information Processing	Signaling molecules and interaction	bmor04080	Neuroactive ligand-receptor interaction - Bombyx mori (domestic silkworm)	2/351	93/3672	0.999142363098615	0.999999978687771	0.899685091037131	692524/101745328	2
	Metabolism	Global and overview maps	bmor01240	Biosynthesis of cofactors - Bombyx mori (domestic silkworm)	5/351	155/3672	0.999466210208172	0.999999978687771	0.899685091037131	693009/101735515/101745237/101745478/101746479	5
	Metabolism	Global and overview maps	bmor01200	Carbon metabolism - Bombyx mori (domestic silkworm)	3/351	119/3672	0.999487858749127	0.999999978687771	0.899685091037131	101740956/101737113/101745054	3
	Cellular Processes	Transport and catabolism	bmor04146	Peroxisome - Bombyx mori (domestic silkworm)	2/351	109/3672	0.999809620044251	0.999999978687771	0.899685091037131	105842517/101739578	2
	Genetic Information Processing	Transcription	bmor03040	Spliceosome - Bombyx mori (domestic silkworm)	6/351	201/3672	0.999946239586922	0.999999978687771	0.899685091037131	101740068/101735663/101735777/733053/101737821/733093	6
	Genetic Information Processing	Translation	bmor03008	Ribosome biogenesis in eukaryotes - Bombyx mori (domestic silkworm)	3/351	188/3672	0.999999103713105	0.999999978687771	0.899685091037131	101746403/101740002/101746473	3
	Genetic Information Processing	Translation	bmor03010	Ribosome - Bombyx mori (domestic silkworm)	5/351	271/3672	0.999999978687771	0.999999978687771	0.899685091037131	100101149/692664/693118/732873/692653	5
