# Supplementary material for: A silkworm model reveals coordinated cellular communities and conserved Hippo regulation in silk production
Source: Research Square preprint supplement (doi:10.21203/rs.3.rs-7747598/v1), 2025-10-01
Supplement: Supplementary file 25 [file Supplementary Data 14.xlsx]

## Sheet: main
Supplementary Data 14. Enrichment analysis of intersecting DEGs in PSGs from L5D6 YkiOE and L5D6 YkiKO larvae.

## Sheet: Enrichment analysis 
	category	subcategory	ID	Description	GeneRatio	BgRatio	pvalue	p.adjust	qvalue	geneID	Count
bmor04141	Genetic Information Processing	Folding, sorting and degradation	bmor04141	Protein processing in endoplasmic reticulum - Bombyx mori (domestic silkworm)	26/288	128/3672	3.87239450362223e-06	0.000464687340434668	0.000444306316731393	733070/692539/692887/692546/732862/692990/101735890/100101162/101740210/101746859/733141/101745384/101736274/100862753/100302620/101746780/101738189/101737157/100302619/101736558/692533/692420/733093/692488/692487/778499	26
bmor04391	Environmental Information Processing	Signal transduction	bmor04391	Hippo signaling pathway - fly - Bombyx mori (domestic silkworm)	12/288	56/3672	0.00104043240362954	0.0624259442177724	0.059687964208221	100144579/101745685/101741262/101743174/101747103/101745387/778465/100145915/100145916/692728/101742023/101740701	12
bmor00190	Metabolism	Energy metabolism	bmor00190	Oxidative phosphorylation - Bombyx mori (domestic silkworm)	20/288	131/3672	0.00260533536868186	0.104213414747275	0.0996426509425695	101738358/732966/732934/751613/692925/101738229/101738548/101742516/100101165/101737782/101744632/780848/100134926/101746562/101741007/733114/101742176/101746156/778517/778519	20
bmor04120	Genetic Information Processing	Folding, sorting and degradation	bmor04120	Ubiquitin mediated proteolysis - Bombyx mori (domestic silkworm)	15/288	90/3672	0.0037757381675349	0.113272145026047	0.108304068489817	100141465/101738475/101735782/101744303/101741790/101735478/692779/101742453/101743548/101736311/101746780/101742698/101741088/100529214/692576	15
bmor00310	Metabolism	Amino acid metabolism	bmor00310	Lysine degradation - Bombyx mori (domestic silkworm)	8/288	39/3672	0.0093378345128698	0.189762000966503	0.18143910618727	100141463/101738271/101742231/101736107/101738260/101737263/101737053/101747197	8
bmor04330	Environmental Information Processing	Signal transduction	bmor04330	Notch signaling pathway - Bombyx mori (domestic silkworm)	6/288	25/3672	0.0109259221800134	0.189762000966503	0.18143910618727	101736421/101745094/101744944/101743676/692897/101739954	6
bmor04711	Organismal Systems	Environmental adaptation	bmor04711	Circadian rhythm - fly - Bombyx mori (domestic silkworm)	4/288	12/3672	0.0110694500563793	0.189762000966503	0.18143910618727	692522/733065/692728/101746519	4
bmor04144	Cellular Processes	Transport and catabolism	bmor04144	Endocytosis - Bombyx mori (domestic silkworm)	16/288	117/3672	0.0189805484841187	0.284708227261781	0.272221024311703	101742319/101738552/101737319/101742207/101739513/101740393/101736454/101741262/100144600/101737965/101744291/101746390/732902/101737683/733093/733063	16
bmor04213	Organismal Systems	Aging	bmor04213	Longevity regulating pathway - multiple species - Bombyx mori (domestic silkworm)	12/288	81/3672	0.0225277991699435	0.300370655599247	0.287196504037876	101739615/101744333/101741278/101736445/101744252/100141438/692754/692533/733093/692488/692487/778499	12
bmor04215	Cellular Processes	Cell growth and death	bmor04215	Apoptosis - multiple species - Bombyx mori (domestic silkworm)	4/288	17/3672	0.0390073827865185	0.468088593438222	0.447558391971633	101738358/100529236/100529214/692576	4
bmor00240	Metabolism	Nucleotide metabolism	bmor00240	Pyrimidine metabolism - Bombyx mori (domestic silkworm)	6/288	34/3672	0.0458944950601725	0.500667218838245	0.478708130292708	100873153/101744022/101736970/100101186/101741300/101742594	6
bmor00520	Metabolism	Carbohydrate metabolism	bmor00520	Amino sugar and nucleotide sugar metabolism - Bombyx mori (domestic silkworm)	6/288	36/3672	0.0583549339957157	0.542862639055112	0.519052874184273	101746744/693032/101746460/101740507/101746316/101745054	6
bmor03060	Genetic Information Processing	Folding, sorting and degradation	bmor03060	Protein export - Bombyx mori (domestic silkworm)	5/288	28/3672	0.0633339745564297	0.542862639055112	0.519052874184273	733070/732924/692977/733141/101738101	5
bmor03250	Genetic Information Processing	Information processing in viruses	bmor03250	Viral life cycle - HIV-1 - Bombyx mori (domestic silkworm)	5/288	28/3672	0.0633339745564297	0.542862639055112	0.519052874184273	101746595/101742207/692970/101744944/101744401	5
bmor04392	Environmental Information Processing	Signal transduction	bmor04392	Hippo signaling pathway - multiple species - Bombyx mori (domestic silkworm)	3/288	13/3672	0.0758377537773205	0.54359549819589	0.51975359038028	100144579/101747103/692728	3
bmor04142	Cellular Processes	Transport and catabolism	bmor04142	Lysosome - Bombyx mori (domestic silkworm)	14/288	119/3672	0.079813341567163	0.54359549819589	0.51975359038028	101739036/732966/101742516/101743490/692847/693032/101740461/101736893/101742786/692390/101742059/101747227/101741318/101744899	14
bmor04068	Environmental Information Processing	Signal transduction	bmor04068	FoxO signaling pathway - Bombyx mori (domestic silkworm)	10/288	78/3672	0.0814382138297882	0.54359549819589	0.51975359038028	101738552/101744333/101737550/101741278/101741790/101739346/101746293/101744944/692728/100141438	10
bmor03082	Genetic Information Processing	Chromosome	bmor03082	ATP-dependent chromatin remodeling - Bombyx mori (domestic silkworm)	9/288	68/3672	0.0815393247293834	0.54359549819589	0.51975359038028	101742611/101735441/101741800/101737615/101744024/100145915/100145916/101739754/100529122	9
bmor01232	Metabolism	Global and overview maps	bmor01232	Nucleotide metabolism - Bombyx mori (domestic silkworm)	8/288	59/3672	0.0871618070851976	0.550495623695985	0.526351078797038	100873153/100329147/101744022/101736970/101740233/100101186/101741300/101746046	8
bmor04145	Cellular Processes	Transport and catabolism	bmor04145	Phagosome - Bombyx mori (domestic silkworm)	9/288	77/3672	0.146040549017033	0.876243294102197	0.837811570676662	733070/732966/101742516/733141/101736274/732902/100145915/100145916/692428	9
bmor01250	Metabolism	Global and overview maps	bmor01250	Biosynthesis of nucleotide sugars - Bombyx mori (domestic silkworm)	4/288	27/3672	0.15690285243039	0.896587728173655	0.857263705008144	101746744/101740507/101746316/101745054	4
bmor05100	Human Diseases	Infectious disease: bacterial	bmor05100	Bacterial invasion of epithelial cells - Bombyx mori (domestic silkworm)	5/288	38/3672	0.173301592224157	0.943013025458753	0.901652805043895	101742319/101744450/101741278/100145915/100145916	5
bmor00970	Genetic Information Processing	Translation	bmor00970	Aminoacyl-tRNA biosynthesis - Bombyx mori (domestic silkworm)	5/288	39/3672	0.186950166807775	0.943013025458753	0.901652805043895	101737924/693023/692991/101741861/101740812	5
bmor04620	Organismal Systems	Immune system	bmor04620	Toll-like receptor signaling pathway - Bombyx mori (domestic silkworm)	4/288	29/3672	0.188602605091751	0.943013025458753	0.901652805043895	101741278/100862753/100141438/100529236	4
bmor04341	Environmental Information Processing	Signal transduction	bmor04341	Hedgehog signaling pathway - fly - Bombyx mori (domestic silkworm)	4/288	31/3672	0.222133521451737	0.999881689017954	0.956027228973307	101745289/692728/101746466/692674	4
bmor04310	Environmental Information Processing	Signal transduction	bmor04310	Wnt signaling pathway - Bombyx mori (domestic silkworm)	8/288	77/3672	0.254229397618653	0.999881689017954	0.956027228973307	101738552/101737550/692577/101744450/101744944/692728/101743676/101739954	8
bmor03018	Genetic Information Processing	Folding, sorting and degradation	bmor03018	RNA degradation - Bombyx mori (domestic silkworm)	6/288	56/3672	0.273468256957921	0.999881689017954	0.956027228973307	732955/101745129/101738383/101743557/101736615/778529	6
bmor04137	Cellular Processes	Transport and catabolism	bmor04137	Mitophagy - animal - Bombyx mori (domestic silkworm)	6/288	56/3672	0.273468256957921	0.999881689017954	0.956027228973307	692779/732902/101736506/101737157/101741924/101742698	6
bmor00010	Metabolism	Carbohydrate metabolism	bmor00010	Glycolysis / Gluconeogenesis - Bombyx mori (domestic silkworm)	5/288	46/3672	0.291223818276819	0.999881689017954	0.956027228973307	100124423/733134/100101211/732915/101745054	5
bmor03022	Genetic Information Processing	Transcription	bmor03022	Basal transcription factors - Bombyx mori (domestic silkworm)	4/288	35/3672	0.293016509160052	0.999881689017954	0.956027228973307	101745832/101745755/101745815/101743500	4
bmor04070	Environmental Information Processing	Signal transduction	bmor04070	Phosphatidylinositol signaling system - Bombyx mori (domestic silkworm)	5/288	47/3672	0.306984500616083	0.999881689017954	0.956027228973307	101746775/101741278/101742216/101745288/101745335	5
bmor00230	Metabolism	Nucleotide metabolism	bmor00230	Purine metabolism - Bombyx mori (domestic silkworm)	9/288	94/3672	0.315669436216277	0.999881689017954	0.956027228973307	101739615/100873153/100329147/101740233/100101186/101744252/101741300/101735940/101746046	9
bmor00910	Metabolism	Energy metabolism	bmor00910	Nitrogen metabolism - Bombyx mori (domestic silkworm)	2/288	15/3672	0.331422343197367	0.999881689017954	0.956027228973307	692876/101744734	2
bmor00511	Metabolism	Glycan biosynthesis and metabolism	bmor00511	Other glycan degradation - Bombyx mori (domestic silkworm)	3/288	26/3672	0.33419125261263	0.999881689017954	0.956027228973307	101743490/693032/101742786	3
bmor00270	Metabolism	Amino acid metabolism	bmor00270	Cysteine and methionine metabolism - Bombyx mori (domestic silkworm)	4/288	38/3672	0.347945676861017	0.999881689017954	0.956027228973307	100124423/101742094/101745237/101742616	4
bmor00760	Metabolism	Metabolism of cofactors and vitamins	bmor00760	Nicotinate and nicotinamide metabolism - Bombyx mori (domestic silkworm)	2/288	16/3672	0.360898183997549	0.999881689017954	0.956027228973307	101735515/692483	2
bmor00531	Metabolism	Glycan biosynthesis and metabolism	bmor00531	Glycosaminoglycan degradation - Bombyx mori (domestic silkworm)	2/288	18/3672	0.418262726092814	0.999881689017954	0.956027228973307	693032/101742059	2
bmor00983	Metabolism	Xenobiotics biodegradation and metabolism	bmor00983	Drug metabolism - other enzymes - Bombyx mori (domestic silkworm)	8/288	91/3672	0.422607035300491	0.999881689017954	0.956027228973307	100873153/101744022/101736970/101740233/100101186/100862843/101742594/100862845	8
bmor03013	Genetic Information Processing	Translation	bmor03013	Nucleocytoplasmic transport - Bombyx mori (domestic silkworm)	7/288	80/3672	0.439796933577995	0.999881689017954	0.956027228973307	101746595/101735669/692970/101745770/101744401/101737898/101735812	7
bmor00565	Metabolism	Lipid metabolism	bmor00565	Ether lipid metabolism - Bombyx mori (domestic silkworm)	3/288	31/3672	0.44341393263104	0.999881689017954	0.956027228973307	101736689/101746390/101746631	3
bmor00785	Metabolism	Metabolism of cofactors and vitamins	bmor00785	Lipoic acid metabolism - Bombyx mori (domestic silkworm)	2/288	19/3672	0.445963272228963	0.999881689017954	0.956027228973307	733134/100101211	2
bmor04814	Cellular Processes	Cell motility	bmor04814	Motor proteins - Bombyx mori (domestic silkworm)	9/288	106/3672	0.453389861529525	0.999881689017954	0.956027228973307	101741495/101738943/101743085/100144600/101738291/100145915/100145916/101742699/692428	9
bmor00062	Metabolism	Lipid metabolism	bmor00062	Fatty acid elongation - Bombyx mori (domestic silkworm)	3/288	32/3672	0.464513206037865	0.999881689017954	0.956027228973307	101739036/101744618/105841738	3
bmor03010	Genetic Information Processing	Translation	bmor03010	Ribosome - Bombyx mori (domestic silkworm)	22/288	271/3672	0.465863184090915	0.999881689017954	0.956027228973307	692706/692701/692700/692694/692779/692662/692705/692717/778451/692692/693118/693065/732856/778514/692709/692714/692702/692726/101737987/732873/692723/692653	22
bmor00514	Metabolism	Glycan biosynthesis and metabolism	bmor00514	Other types of O-glycan biosynthesis - Bombyx mori (domestic silkworm)	2/288	21/3672	0.499060571468289	0.999881689017954	0.956027228973307	100141463/101744145	2
bmor00564	Metabolism	Lipid metabolism	bmor00564	Glycerophospholipid metabolism - Bombyx mori (domestic silkworm)	6/288	72/3672	0.501557059539795	0.999881689017954	0.956027228973307	101739608/101746390/101745288/101741580/101746631/101745335	6
bmor00051	Metabolism	Carbohydrate metabolism	bmor00051	Fructose and mannose metabolism - Bombyx mori (domestic silkworm)	2/288	22/3672	0.524364336363698	0.999881689017954	0.956027228973307	732915/101745054	2
bmor00052	Metabolism	Carbohydrate metabolism	bmor00052	Galactose metabolism - Bombyx mori (domestic silkworm)	2/288	22/3672	0.524364336363698	0.999881689017954	0.956027228973307	101746316/101745054	2
bmor00561	Metabolism	Lipid metabolism	bmor00561	Glycerolipid metabolism - Bombyx mori (domestic silkworm)	4/288	49/3672	0.543385354774704	0.999881689017954	0.956027228973307	101739608/101745288/101741580/101745335	4
bmor00020	Metabolism	Carbohydrate metabolism	bmor00020	Citrate cycle (TCA cycle) - Bombyx mori (domestic silkworm)	3/288	36/3672	0.545022271383477	0.999881689017954	0.956027228973307	733134/100101211/101742176	3
bmor00563	Metabolism	Glycan biosynthesis and metabolism	bmor00563	Glycosylphosphatidylinositol (GPI)-anchor biosynthesis - Bombyx mori (domestic silkworm)	2/288	23/3672	0.54879592191333	0.999881689017954	0.956027228973307	101737110/101741111	2
bmor00500	Metabolism	Carbohydrate metabolism	bmor00500	Starch and sucrose metabolism - Bombyx mori (domestic silkworm)	2/288	24/3672	0.572336103665224	0.999881689017954	0.956027228973307	101745054/692454	2
bmor03083	Genetic Information Processing	Chromosome	bmor03083	Polycomb repressive complex - Bombyx mori (domestic silkworm)	3/288	38/3672	0.582555274267927	0.999881689017954	0.956027228973307	100529124/101744944/100529122	3
bmor04745	Organismal Systems	Sensory system	bmor04745	Phototransduction - fly - Bombyx mori (domestic silkworm)	2/288	25/3672	0.594974001562783	0.999881689017954	0.956027228973307	100145915/100145916	2
bmor00600	Metabolism	Lipid metabolism	bmor00600	Sphingolipid metabolism - Bombyx mori (domestic silkworm)	3/288	39/3672	0.6005727834799	0.999881689017954	0.956027228973307	101741167/693032/101742786	3
bmor00620	Metabolism	Carbohydrate metabolism	bmor00620	Pyruvate metabolism - Bombyx mori (domestic silkworm)	3/288	39/3672	0.6005727834799	0.999881689017954	0.956027228973307	100124423/733134/100101211	3
bmor03050	Genetic Information Processing	Folding, sorting and degradation	bmor03050	Proteasome - Bombyx mori (domestic silkworm)	3/288	39/3672	0.6005727834799	0.999881689017954	0.956027228973307	733131/101746211/692900	3
bmor00360	Metabolism	Amino acid metabolism	bmor00360	Phenylalanine metabolism - Bombyx mori (domestic silkworm)	1/288	12/3672	0.625314922784668	0.999881689017954	0.956027228973307	101745777	1
bmor00130	Metabolism	Metabolism of cofactors and vitamins	bmor00130	Ubiquinone and other terpenoid-quinone biosynthesis - Bombyx mori (domestic silkworm)	2/288	27/3672	0.637534184882487	0.999881689017954	0.956027228973307	101746908/101747041	2
bmor04140	Cellular Processes	Transport and catabolism	bmor04140	Autophagy - animal - Bombyx mori (domestic silkworm)	8/288	111/3672	0.652509389352923	0.999881689017954	0.956027228973307	101740181/101741278/692779/732902/692390/100141438/101742698/101738071	8
bmor04820	NA	NA	bmor04820	Cytoskeleton in muscle cells - Bombyx mori (domestic silkworm)	5/288	71/3672	0.665203172998003	0.999881689017954	0.956027228973307	101737442/101743323/100145915/100145916/101746046	5
bmor00534	Metabolism	Glycan biosynthesis and metabolism	bmor00534	Glycosaminoglycan biosynthesis - heparan sulfate / heparin - Bombyx mori (domestic silkworm)	1/288	14/3672	0.681969171835626	0.999881689017954	0.956027228973307	101739145	1
bmor03410	Genetic Information Processing	Replication and repair	bmor03410	Base excision repair - Bombyx mori (domestic silkworm)	2/288	30/3672	0.694694237137381	0.999881689017954	0.956027228973307	101739679/101735453	2
bmor00730	Metabolism	Metabolism of cofactors and vitamins	bmor00730	Thiamine metabolism - Bombyx mori (domestic silkworm)	1/288	15/3672	0.707008231024074	0.999881689017954	0.956027228973307	100329147	1
bmor04214	Cellular Processes	Cell growth and death	bmor04214	Apoptosis - fly - Bombyx mori (domestic silkworm)	3/288	46/3672	0.711951547670786	0.999881689017954	0.956027228973307	101738358/101743323/100862753	3
bmor00330	Metabolism	Amino acid metabolism	bmor00330	Arginine and proline metabolism - Bombyx mori (domestic silkworm)	2/288	31/3672	0.712023913310233	0.999881689017954	0.956027228973307	692924/101742094	2
bmor03440	Genetic Information Processing	Replication and repair	bmor03440	Homologous recombination - Bombyx mori (domestic silkworm)	2/288	31/3672	0.712023913310233	0.999881689017954	0.956027228973307	101735478/692385	2
bmor04350	Environmental Information Processing	Signal transduction	bmor04350	TGF-beta signaling pathway - Bombyx mori (domestic silkworm)	3/288	47/3672	0.725741248714885	0.999881689017954	0.956027228973307	101745746/101738552/101744944	3
bmor03272	NA	NA	bmor03272	Virion - Hepatitis viruses - Bombyx mori (domestic silkworm)	2/288	32/3672	0.72852462712839	0.999881689017954	0.956027228973307	101742207/692847	2
bmor00380	Metabolism	Amino acid metabolism	bmor00380	Tryptophan metabolism - Bombyx mori (domestic silkworm)	2/288	33/3672	0.744219315294601	0.999881689017954	0.956027228973307	101745777/101745043	2
bmor04150	Environmental Information Processing	Signal transduction	bmor04150	mTOR signaling pathway - Bombyx mori (domestic silkworm)	7/288	107/3672	0.746745338955361	0.999881689017954	0.956027228973307	101746912/101739424/101736611/101739189/101741278/101741790/100141438	7
bmor00541	Metabolism	Glycan biosynthesis and metabolism	bmor00541	Biosynthesis of various nucleotide sugars - Bombyx mori (domestic silkworm)	1/288	17/3672	0.751344902803091	0.999881689017954	0.956027228973307	101746744	1
bmor03460	Genetic Information Processing	Replication and repair	bmor03460	Fanconi anemia pathway - Bombyx mori (domestic silkworm)	2/288	34/3672	0.759132422869683	0.999881689017954	0.956027228973307	101735478/100620066	2
bmor00770	Metabolism	Metabolism of cofactors and vitamins	bmor00770	Pantothenate and CoA biosynthesis - Bombyx mori (domestic silkworm)	1/288	18/3672	0.770937972021343	0.999881689017954	0.956027228973307	101742594	1
bmor03430	Genetic Information Processing	Replication and repair	bmor03430	Mismatch repair - Bombyx mori (domestic silkworm)	1/288	18/3672	0.770937972021343	0.999881689017954	0.956027228973307	101741887	1
bmor03420	Genetic Information Processing	Replication and repair	bmor03420	Nucleotide excision repair - Bombyx mori (domestic silkworm)	3/288	51/3672	0.775785485697757	0.999881689017954	0.956027228973307	101746067/101739752/101745815	3
bmor04624	Organismal Systems	Immune system	bmor04624	Toll and Imd signaling pathway - Bombyx mori (domestic silkworm)	4/288	67/3672	0.783083400355232	0.999881689017954	0.956027228973307	692440/100862753/100529236/100529214	4
bmor00071	Metabolism	Lipid metabolism	bmor00071	Fatty acid degradation - Bombyx mori (domestic silkworm)	2/288	36/3672	0.786717013196501	0.999881689017954	0.956027228973307	101737109/105841738	2
bmor01210	Metabolism	Global and overview maps	bmor01210	2-Oxocarboxylic acid metabolism - Bombyx mori (domestic silkworm)	2/288	36/3672	0.786717013196501	0.999881689017954	0.956027228973307	733134/100101211	2
bmor00260	Metabolism	Amino acid metabolism	bmor00260	Glycine, serine and threonine metabolism - Bombyx mori (domestic silkworm)	2/288	37/3672	0.799441787439368	0.999881689017954	0.956027228973307	693077/101742616	2
bmor04148	Cellular Processes	Transport and catabolism	bmor04148	Efferocytosis - Bombyx mori (domestic silkworm)	4/288	69/3672	0.802262710505011	0.999881689017954	0.956027228973307	101737109/101741199/100526764/732902	4
bmor00480	Metabolism	Metabolism of other amino acids	bmor00480	Glutathione metabolism - Bombyx mori (domestic silkworm)	3/288	55/3672	0.818109346893686	0.999881689017954	0.956027228973307	100873153/101742094/101745237	3
bmor00860	Metabolism	Metabolism of cofactors and vitamins	bmor00860	Porphyrin metabolism - Bombyx mori (domestic silkworm)	3/288	55/3672	0.818109346893686	0.999881689017954	0.956027228973307	732916/100862843/100862845	3
bmor04082	NA	NA	bmor04082	Neuroactive ligand signaling - Bombyx mori (domestic silkworm)	4/288	71/3672	0.820051200789417	0.999881689017954	0.956027228973307	101739615/101744252/101745328/733012	4
bmor02010	Environmental Information Processing	Membrane transport	bmor02010	ABC transporters - Bombyx mori (domestic silkworm)	2/288	40/3672	0.833671900917243	0.999881689017954	0.956027228973307	101745183/101741720	2
bmor00592	Metabolism	Lipid metabolism	bmor00592	alpha-Linolenic acid metabolism - Bombyx mori (domestic silkworm)	1/288	22/3672	0.835079622970524	0.999881689017954	0.956027228973307	101746631	1
bmor04081	NA	NA	bmor04081	Hormone signaling - Bombyx mori (domestic silkworm)	4/288	73/3672	0.836505977961401	0.999881689017954	0.956027228973307	101739615/101741278/101744252/733012	4
bmor04136	Cellular Processes	Transport and catabolism	bmor04136	Autophagy - other - Bombyx mori (domestic silkworm)	1/288	23/3672	0.848092518473124	0.999881689017954	0.956027228973307	101738071	1
bmor04512	Environmental Information Processing	Signaling molecules and interaction	bmor04512	ECM-receptor interaction - Bombyx mori (domestic silkworm)	1/288	24/3672	0.860081927812598	0.999881689017954	0.956027228973307	100862837	1
bmor00562	Metabolism	Carbohydrate metabolism	bmor00562	Inositol phosphate metabolism - Bombyx mori (domestic silkworm)	2/288	43/3672	0.862551806706724	0.999881689017954	0.956027228973307	101741278/101742216	2
bmor04382	NA	NA	bmor04382	Cornified envelope formation - Bombyx mori (domestic silkworm)	2/288	43/3672	0.862551806706724	0.999881689017954	0.956027228973307	101746772/101742786	2
bmor00513	Metabolism	Glycan biosynthesis and metabolism	bmor00513	Various types of N-glycan biosynthesis - Bombyx mori (domestic silkworm)	2/288	44/3672	0.871111863303326	0.999881689017954	0.956027228973307	692887/693032	2
bmor04013	Environmental Information Processing	Signal transduction	bmor04013	MAPK signaling pathway - fly - Bombyx mori (domestic silkworm)	4/288	78/3672	0.872221079334927	0.999881689017954	0.956027228973307	101742601/101744813/100862753/101743676	4
bmor00670	Metabolism	Metabolism of cofactors and vitamins	bmor00670	One carbon pool by folate - Bombyx mori (domestic silkworm)	1/288	26/3672	0.881304979170249	0.999881689017954	0.956027228973307	101742616	1
bmor00900	Metabolism	Metabolism of terpenoids and polyketides	bmor00900	Terpenoid backbone biosynthesis - Bombyx mori (domestic silkworm)	1/288	26/3672	0.881304979170249	0.999881689017954	0.956027228973307	692501	1
bmor00030	Metabolism	Carbohydrate metabolism	bmor00030	Pentose phosphate pathway - Bombyx mori (domestic silkworm)	1/288	27/3672	0.890680778950547	0.999881689017954	0.956027228973307	732915	1
bmor00640	Metabolism	Carbohydrate metabolism	bmor00640	Propanoate metabolism - Bombyx mori (domestic silkworm)	1/288	27/3672	0.890680778950547	0.999881689017954	0.956027228973307	100124423	1
bmor01212	Metabolism	Global and overview maps	bmor01212	Fatty acid metabolism - Bombyx mori (domestic silkworm)	4/288	85/3672	0.910844177742744	0.999881689017954	0.956027228973307	101737109/101739036/101744618/105841738	4
bmor03020	Genetic Information Processing	Transcription	bmor03020	RNA polymerase - Bombyx mori (domestic silkworm)	1/288	30/3672	0.914606016306454	0.999881689017954	0.956027228973307	101746067	1
bmor03015	Genetic Information Processing	Translation	bmor03015	mRNA surveillance pathway - Bombyx mori (domestic silkworm)	3/288	70/3672	0.921584367714867	0.999881689017954	0.956027228973307	101737436/101735812/778529	3
bmor00053	Metabolism	Carbohydrate metabolism	bmor00053	Ascorbate and aldarate metabolism - Bombyx mori (domestic silkworm)	2/288	52/3672	0.923828921632846	0.999881689017954	0.956027228973307	100862843/100862845	2
bmor00410	Metabolism	Metabolism of other amino acids	bmor00410	beta-Alanine metabolism - Bombyx mori (domestic silkworm)	1/288	33/3672	0.933309205419065	0.999881689017954	0.956027228973307	101742594	1
bmor00830	Metabolism	Metabolism of cofactors and vitamins	bmor00830	Retinol metabolism - Bombyx mori (domestic silkworm)	2/288	55/3672	0.937756097301155	0.999881689017954	0.956027228973307	100862843/100862845	2
bmor03030	Genetic Information Processing	Replication and repair	bmor03030	DNA replication - Bombyx mori (domestic silkworm)	1/288	34/3672	0.938587289738744	0.999881689017954	0.956027228973307	101743127	1
bmor00590	Metabolism	Lipid metabolism	bmor00590	Arachidonic acid metabolism - Bombyx mori (domestic silkworm)	2/288	56/3672	0.941837066035294	0.999881689017954	0.956027228973307	101746631/101745595	2
bmor00510	Metabolism	Glycan biosynthesis and metabolism	bmor00510	N-Glycan biosynthesis - Bombyx mori (domestic silkworm)	1/288	35/3672	0.943448988626935	0.999881689017954	0.956027228973307	692887	1
bmor00040	Metabolism	Carbohydrate metabolism	bmor00040	Pentose and glucuronate interconversions - Bombyx mori (domestic silkworm)	2/288	57/3672	0.945663589816178	0.999881689017954	0.956027228973307	100862843/100862845	2
bmor00350	Metabolism	Amino acid metabolism	bmor00350	Tyrosine metabolism - Bombyx mori (domestic silkworm)	1/288	36/3672	0.947927045067805	0.999881689017954	0.956027228973307	101745777	1
bmor00982	Metabolism	Xenobiotics biodegradation and metabolism	bmor00982	Drug metabolism - cytochrome P450 - Bombyx mori (domestic silkworm)	2/288	62/3672	0.961467016425656	0.999881689017954	0.956027228973307	100862843/100862845	2
bmor00280	Metabolism	Amino acid metabolism	bmor00280	Valine, leucine and isoleucine degradation - Bombyx mori (domestic silkworm)	1/288	40/3672	0.962571981740207	0.999881689017954	0.956027228973307	105841738	1
bmor00630	Metabolism	Carbohydrate metabolism	bmor00630	Glyoxylate and dicarboxylate metabolism - Bombyx mori (domestic silkworm)	1/288	40/3672	0.962571981740207	0.999881689017954	0.956027228973307	101745043	1
bmor01200	Metabolism	Global and overview maps	bmor01200	Carbon metabolism - Bombyx mori (domestic silkworm)	5/288	119/3672	0.963327283191884	0.999881689017954	0.956027228973307	733134/100101211/732915/101745054/101742176	5
bmor01240	Metabolism	Global and overview maps	bmor01240	Biosynthesis of cofactors - Bombyx mori (domestic silkworm)	7/288	155/3672	0.966464867982253	0.999881689017954	0.956027228973307	100329147/101735515/100101186/101745043/101745237/100862843/100862845	7
bmor00980	Metabolism	Xenobiotics biodegradation and metabolism	bmor00980	Metabolism of xenobiotics by cytochrome P450 - Bombyx mori (domestic silkworm)	2/288	67/3672	0.972815817422599	0.999881689017954	0.956027228973307	100862843/100862845	2
bmor01040	Metabolism	Lipid metabolism	bmor01040	Biosynthesis of unsaturated fatty acids - Bombyx mori (domestic silkworm)	1/288	51/3672	0.984935524891176	0.999881689017954	0.956027228973307	101744618	1
bmor03040	Genetic Information Processing	Transcription	bmor03040	Spliceosome - Bombyx mori (domestic silkworm)	8/288	201/3672	0.992107775959715	0.999881689017954	0.956027228973307	732955/101738204/733079/692972/101736447/733053/732985/733093	8
bmor01230	Metabolism	Global and overview maps	bmor01230	Biosynthesis of amino acids - Bombyx mori (domestic silkworm)	1/288	69/3672	0.996623356474631	0.999881689017954	0.956027228973307	101742616	1
bmor04080	Environmental Information Processing	Signaling molecules and interaction	bmor04080	Neuroactive ligand-receptor interaction - Bombyx mori (domestic silkworm)	1/288	93/3672	0.999545803000855	0.999881689017954	0.956027228973307	101745328	1
bmor03008	Genetic Information Processing	Translation	bmor03008	Ribosome biogenesis in eukaryotes - Bombyx mori (domestic silkworm)	4/288	188/3672	0.999866824590535	0.999881689017954	0.956027228973307	101742458/692970/692972/101746403	4
bmor04146	Cellular Processes	Transport and catabolism	bmor04146	Peroxisome - Bombyx mori (domestic silkworm)	1/288	109/3672	0.999881689017954	0.999881689017954	0.956027228973307	105842517	1
