# Supplementary material for: A silkworm model reveals coordinated cellular communities and conserved Hippo regulation in silk production
Source: Research Square preprint supplement (doi:10.21203/rs.3.rs-7747598/v1), 2025-10-01
Supplement: Supplementary file 29 [file Supplementary Data 15.xlsx]

## Sheet: main
Supplementary Data 15. Enrichment of seven cell types across high-yield and low-yield silk strains.

## Sheet: Cell type enrichment in samples
	CellType	Sample	ratio	Group
1	CBCs	SRR1767680	0.267023750965721	MuHigh
2	CSSs	SRR1767680	0.0498907011295859	MuHigh
3	ECRs	SRR1767680	0.106263415904059	MuHigh
4	ESMs	SRR1767680	0.282046418665126	MuHigh
5	FBSs	SRR1767680	0.112886829027554	MuHigh
6	HMSs	SRR1767680	0.109132877042498	MuHigh
7	NCSs	SRR1767680	0.0727560072654554	MuHigh
8	CBCs	SRR16350306	0.396042687663672	MuHigh
9	CSSs	SRR16350306	0	MuHigh
10	ECRs	SRR16350306	0.0882531969747209	MuHigh
11	ESMs	SRR16350306	0.23675061738972	MuHigh
12	FBSs	SRR16350306	0.241094104258757	MuHigh
13	HMSs	SRR16350306	0	MuHigh
14	NCSs	SRR16350306	0.0378593937131299	MuHigh
15	CBCs	SRR16350307	0.354810441833235	MuHigh
16	CSSs	SRR16350307	0	MuHigh
17	ECRs	SRR16350307	0.0990932822132385	MuHigh
18	ESMs	SRR16350307	0.266391407498049	MuHigh
19	FBSs	SRR16350307	0.232531488476526	MuHigh
20	HMSs	SRR16350307	0	MuHigh
21	NCSs	SRR16350307	0.047173379978952	MuHigh
22	CBCs	SRR16350309	0.312640690083098	MuHigh
23	CSSs	SRR16350309	0	MuHigh
24	ECRs	SRR16350309	0.0803898711068605	MuHigh
25	ESMs	SRR16350309	0.321625600397749	MuHigh
26	FBSs	SRR16350309	0.216950024070845	MuHigh
27	HMSs	SRR16350309	0	MuHigh
28	NCSs	SRR16350309	0.0683938143414476	MuHigh
29	CBCs	SRR16350310	0.177909282789588	MuHigh
30	CSSs	SRR16350310	0	MuHigh
31	ECRs	SRR16350310	0.0669704052826206	MuHigh
32	ESMs	SRR16350310	0.443217282680304	MuHigh
33	FBSs	SRR16350310	0.170905979173641	MuHigh
34	HMSs	SRR16350310	0	MuHigh
35	NCSs	SRR16350310	0.140997050073847	MuHigh
36	CBCs	SRR16350311	0.181132600146633	MuHigh
37	CSSs	SRR16350311	0	MuHigh
38	ECRs	SRR16350311	0.0723228767811764	MuHigh
39	ESMs	SRR16350311	0.433345874608717	MuHigh
40	FBSs	SRR16350311	0.171151981047574	MuHigh
41	HMSs	SRR16350311	0	MuHigh
42	NCSs	SRR16350311	0.1420466674159	MuHigh
43	CBCs	SRR16350313	0.201125015731123	MuHigh
44	CSSs	SRR16350313	0	MuHigh
45	ECRs	SRR16350313	0.0626824551059768	MuHigh
46	ESMs	SRR16350313	0.429618847333428	MuHigh
47	FBSs	SRR16350313	0.179350678705658	MuHigh
48	HMSs	SRR16350313	0	MuHigh
49	NCSs	SRR16350313	0.127223003123814	MuHigh
50	CBCs	SRR16350314	0.218324575006469	MuHigh
51	CSSs	SRR16350314	0.0029827525453397	MuHigh
52	ECRs	SRR16350314	0.0631683348052111	MuHigh
53	ESMs	SRR16350314	0.406149956987648	MuHigh
54	FBSs	SRR16350314	0.172875948566158	MuHigh
55	HMSs	SRR16350314	0	MuHigh
56	NCSs	SRR16350314	0.136498432089175	MuHigh
57	CBCs	SRR16350315	0.271028354700056	MuHigh
58	CSSs	SRR16350315	0	MuHigh
59	ECRs	SRR16350315	0.0751019424229339	MuHigh
60	ESMs	SRR16350315	0.365515043531592	MuHigh
61	FBSs	SRR16350315	0.217142766162789	MuHigh
62	HMSs	SRR16350315	0	MuHigh
63	NCSs	SRR16350315	0.0712118931826292	MuHigh
64	CBCs	SRR16350316	0.275602898223106	MuHigh
65	CSSs	SRR16350316	0	MuHigh
66	ECRs	SRR16350316	0.0728370329432812	MuHigh
67	ESMs	SRR16350316	0.358884521506602	MuHigh
68	FBSs	SRR16350316	0.209702661572287	MuHigh
69	HMSs	SRR16350316	0	MuHigh
70	NCSs	SRR16350316	0.0829728857547238	MuHigh
71	CBCs	SRR16350317	0.316173870393009	MuHigh
72	CSSs	SRR16350317	0	MuHigh
73	ECRs	SRR16350317	0.0882428267468657	MuHigh
74	ESMs	SRR16350317	0.306711657778233	MuHigh
75	FBSs	SRR16350317	0.222231865388943	MuHigh
76	HMSs	SRR16350317	0	MuHigh
77	NCSs	SRR16350317	0.0666397796929498	MuHigh
78	CBCs	SRR16350318	0.252085812758885	MuHigh
79	CSSs	SRR16350318	0	MuHigh
80	ECRs	SRR16350318	0.0871789104536358	MuHigh
81	ESMs	SRR16350318	0.360456941749899	MuHigh
82	FBSs	SRR16350318	0.20454677258367	MuHigh
83	HMSs	SRR16350318	0	MuHigh
84	NCSs	SRR16350318	0.0957315624539111	MuHigh
85	CBCs	SRR22571454	0.419673029848165	MuHigh
86	CSSs	SRR22571454	0.0676303997382501	MuHigh
87	ECRs	SRR22571454	0.0129792981387519	MuHigh
88	ESMs	SRR22571454	0.253329946218442	MuHigh
89	FBSs	SRR22571454	0.24638732605639	MuHigh
90	HMSs	SRR22571454	0	MuHigh
91	NCSs	SRR22571454	0	MuHigh
92	CBCs	SRR22571455	0.383711809383122	MuHigh
93	CSSs	SRR22571455	0.0612000323073734	MuHigh
94	ECRs	SRR22571455	0.0291802751293792	MuHigh
95	ESMs	SRR22571455	0.276962516800736	MuHigh
96	FBSs	SRR22571455	0.245632701150091	MuHigh
97	HMSs	SRR22571455	0	MuHigh
98	NCSs	SRR22571455	0.0033126652292981	MuHigh
99	CBCs	SRR22571456	0.334150504904353	MuHigh
100	CSSs	SRR22571456	0	MuHigh
101	ECRs	SRR22571456	0.0881261253892918	MuHigh
102	ESMs	SRR22571456	0.293994461927726	MuHigh
103	FBSs	SRR22571456	0.225016751389684	MuHigh
104	HMSs	SRR22571456	0	MuHigh
105	NCSs	SRR22571456	0.0587121563889445	MuHigh
106	CBCs	SRR22571457	0.482231120999064	MuHigh
107	CSSs	SRR22571457	0.0899227780095527	MuHigh
108	ECRs	SRR22571457	0	MuHigh
109	ESMs	SRR22571457	0.18368501343666	MuHigh
110	FBSs	SRR22571457	0.244161087554724	MuHigh
111	HMSs	SRR22571457	0	MuHigh
112	NCSs	SRR22571457	0	MuHigh
113	CBCs	SRR6516056	0.399775220378285	MuLow
114	CSSs	SRR6516056	0.00634241951042641	MuLow
115	ECRs	SRR6516056	0.0829103050889552	MuLow
116	ESMs	SRR6516056	0.250414495850839	MuLow
117	FBSs	SRR6516056	0.225359067154803	MuLow
118	HMSs	SRR6516056	0	MuLow
119	NCSs	SRR6516056	0.0351984920166912	MuLow
120	CBCs	SRR6516057	0.313609765755318	MuLow
121	CSSs	SRR6516057	0.0114720266961449	MuLow
122	ECRs	SRR6516057	0.0954643591151024	MuLow
123	ESMs	SRR6516057	0.25876051697782	MuLow
124	FBSs	SRR6516057	0.134713174295264	MuLow
125	HMSs	SRR6516057	0	MuLow
126	NCSs	SRR6516057	0.18598015716035	MuLow
127	CBCs	SRR6516058	0.486704782888409	MuLow
128	CSSs	SRR6516058	0.0212167850226058	MuLow
129	ECRs	SRR6516058	0.113127022632007	MuLow
130	ESMs	SRR6516058	0.0762390835958636	MuLow
131	FBSs	SRR6516058	0.18262647649401	MuLow
132	HMSs	SRR6516058	0	MuLow
133	NCSs	SRR6516058	0.120085849367104	MuLow
134	CBCs	SRR6516059	0.445301663874013	MuLow
135	CSSs	SRR6516059	0	MuLow
136	ECRs	SRR6516059	0.0827161012339152	MuLow
137	ESMs	SRR6516059	0.210566641671942	MuLow
138	FBSs	SRR6516059	0.243997723157263	MuLow
139	HMSs	SRR6516059	0	MuLow
140	NCSs	SRR6516059	0.0174178700628672	MuLow
141	CBCs	SRR6516062	0.242177101435547	MuLow
142	CSSs	SRR6516062	0.0518900995061398	MuLow
143	ECRs	SRR6516062	0	MuLow
144	ESMs	SRR6516062	0.382784573949927	MuLow
145	FBSs	SRR6516062	0.185186829629683	MuLow
146	HMSs	SRR6516062	0.0999762836959634	MuLow
147	NCSs	SRR6516062	0.0379851117827399	MuLow
148	CBCs	SRR6516063	0.182788732864101	MuLow
149	CSSs	SRR6516063	0.0430783601898038	MuLow
150	ECRs	SRR6516063	0	MuLow
151	ESMs	SRR6516063	0.444481901252969	MuLow
152	FBSs	SRR6516063	0.177131808432171	MuLow
153	HMSs	SRR6516063	0.111320479109036	MuLow
154	NCSs	SRR6516063	0.041198718151919	MuLow
155	CBCs	SRR6516066	0.22112361614152	MuLow
156	CSSs	SRR6516066	0.0663936612427879	MuLow
157	ECRs	SRR6516066	0	MuLow
158	ESMs	SRR6516066	0.403289773181331	MuLow
159	FBSs	SRR6516066	0.182023616985029	MuLow
160	HMSs	SRR6516066	0.0905626260635675	MuLow
161	NCSs	SRR6516066	0.0366067063857647	MuLow
162	CBCs	SRR6002262	0.0676161623354076	MuLow
163	CSSs	SRR6002262	0.0437733607124617	MuLow
164	ECRs	SRR6002262	0	MuLow
165	ESMs	SRR6002262	0.570312855389077	MuLow
166	FBSs	SRR6002262	0.135053671373903	MuLow
167	HMSs	SRR6002262	0.0882220812997587	MuLow
168	NCSs	SRR6002262	0.0950218688893923	MuLow
169	CBCs	SRR6002263	0.0767570217613386	MuLow
170	CSSs	SRR6002263	0.0389923997886185	MuLow
171	ECRs	SRR6002263	0	MuLow
172	ESMs	SRR6002263	0.560549686186858	MuLow
173	FBSs	SRR6002263	0.134940278592628	MuLow
174	HMSs	SRR6002263	0.103549406081508	MuLow
175	NCSs	SRR6002263	0.0852112075890486	MuLow
176	CBCs	SRR24187219	0.143549946460872	MuLow
177	CSSs	SRR24187219	0.0319910949173121	MuLow
178	ECRs	SRR24187219	0	MuLow
179	ESMs	SRR24187219	0.491057548715533	MuLow
180	FBSs	SRR24187219	0.159083758798374	MuLow
181	HMSs	SRR24187219	0.0855364362853016	MuLow
182	NCSs	SRR24187219	0.0887812148226072	MuLow
183	CBCs	SRR24187223	0.182390669488518	MuLow
184	CSSs	SRR24187223	0.0014042467654172	MuLow
185	ECRs	SRR24187223	0.0898995583187465	MuLow
186	ESMs	SRR24187223	0.385786641841948	MuLow
187	FBSs	SRR24187223	0.0780009240618115	MuLow
188	HMSs	SRR24187223	0.0443645922578415	MuLow
189	NCSs	SRR24187223	0.218153367265718	MuLow
190	CBCs	SRR24187224	0.190467650049784	MuLow
191	CSSs	SRR24187224	0.0299264525634753	MuLow
192	ECRs	SRR24187224	0.0689344463364963	MuLow
193	ESMs	SRR24187224	0.392295121754137	MuLow
194	FBSs	SRR24187224	0.0817745538064231	MuLow
195	HMSs	SRR24187224	0.0584417166836428	MuLow
196	NCSs	SRR24187224	0.178160058806041	MuLow
197	CBCs	SRR24187225	0.213671898224817	MuLow
198	CSSs	SRR24187225	0.0215756554320647	MuLow
199	ECRs	SRR24187225	0.0758713218300195	MuLow
200	ESMs	SRR24187225	0.363341693386932	MuLow
201	FBSs	SRR24187225	0.0751757350749055	MuLow
202	HMSs	SRR24187225	0.0628786898850978	MuLow
203	NCSs	SRR24187225	0.187485006166164	MuLow
204	CBCs	SRR24187226	0.247521322974992	MuLow
205	CSSs	SRR24187226	0.0233758506835638	MuLow
206	ECRs	SRR24187226	0	MuLow
207	ESMs	SRR24187226	0.380781395684267	MuLow
208	FBSs	SRR24187226	0.160718449307995	MuLow
209	HMSs	SRR24187226	0.124766701200153	MuLow
210	NCSs	SRR24187226	0.0628362801490296	MuLow
211	CBCs	SRR24187230	0.306463034565249	MuLow
212	CSSs	SRR24187230	0.0407593588983168	MuLow
213	ECRs	SRR24187230	0	MuLow
214	ESMs	SRR24187230	0.316315026904735	MuLow
215	FBSs	SRR24187230	0.170438327944478	MuLow
216	HMSs	SRR24187230	0.11287127742341	MuLow
217	NCSs	SRR24187230	0.0531529742638121	MuLow
218	CBCs	SRR26898930	0.167794964234614	MuLow
219	CSSs	SRR26898930	0.0416289594250845	MuLow
220	ECRs	SRR26898930	0	MuLow
221	ESMs	SRR26898930	0.461321912794008	MuLow
222	FBSs	SRR26898930	0.16918696715362	MuLow
223	HMSs	SRR26898930	0.103614684656647	MuLow
224	NCSs	SRR26898930	0.0564525117360268	MuLow
225	CBCs	SRR26898931	0.116124442418754	MuLow
226	CSSs	SRR26898931	0.033525103894996	MuLow
227	ECRs	SRR26898931	0	MuLow
228	ESMs	SRR26898931	0.51447360775377	MuLow
229	FBSs	SRR26898931	0.153472535724549	MuLow
230	HMSs	SRR26898931	0.141976390822387	MuLow
231	NCSs	SRR26898931	0.0404279193855448	MuLow
232	CBCs	SRR26898932	0.13572384217678	MuLow
233	CSSs	SRR26898932	0.0341366745491218	MuLow
234	ECRs	SRR26898932	0	MuLow
235	ESMs	SRR26898932	0.496033917881574	MuLow
236	FBSs	SRR26898932	0.156672741388367	MuLow
237	HMSs	SRR26898932	0.133207120211665	MuLow
238	NCSs	SRR26898932	0.0442257037924932	MuLow
239	CBCs	SRR26898933	0.0998033870297096	MuLow
240	CSSs	SRR26898933	0.035719967603808	MuLow
241	ECRs	SRR26898933	0	MuLow
242	ESMs	SRR26898933	0.531770099693235	MuLow
243	FBSs	SRR26898933	0.154520809265488	MuLow
244	HMSs	SRR26898933	0.134155719307112	MuLow
245	NCSs	SRR26898933	0.0440300171006469	MuLow
246	CBCs	SRR26898937	0.299299639391997	MuLow
247	CSSs	SRR26898937	0.0238194410511926	MuLow
248	ECRs	SRR26898937	0	MuLow
249	ESMs	SRR26898937	0.317747063147924	MuLow
250	FBSs	SRR26898937	0.158013716849234	MuLow
251	HMSs	SRR26898937	0.201120139559654	MuLow
252	NCSs	SRR26898937	0	MuLow
253	CBCs	SRR26898941	0.234620741415635	MuLow
254	CSSs	SRR26898941	0.0297387657473846	MuLow
255	ECRs	SRR26898941	0	MuLow
256	ESMs	SRR26898941	0.385520161052922	MuLow
257	FBSs	SRR26898941	0.184030617705034	MuLow
258	HMSs	SRR26898941	0.13637579776885	MuLow
259	NCSs	SRR26898941	0.0297139163101753	MuLow
260	CBCs	SRR26898942	0.277320810102179	MuLow
261	CSSs	SRR26898942	0.0266187204727128	MuLow
262	ECRs	SRR26898942	0	MuLow
263	ESMs	SRR26898942	0.340263807872784	MuLow
264	FBSs	SRR26898942	0.177238311405322	MuLow
265	HMSs	SRR26898942	0.161026150578714	MuLow
266	NCSs	SRR26898942	0.0175321995682876	MuLow
267	CBCs	SRR26898943	0.196298088079527	MuLow
268	CSSs	SRR26898943	0.0301506219844317	MuLow
269	ECRs	SRR26898943	0	MuLow
270	ESMs	SRR26898943	0.426727724152344	MuLow
271	FBSs	SRR26898943	0.174605105003557	MuLow
272	HMSs	SRR26898943	0.142117893640126	MuLow
273	NCSs	SRR26898943	0.0301005671400159	MuLow
274	CBCs	SRR26898944	0.168045486594345	MuLow
275	CSSs	SRR26898944	0.0362641953764319	MuLow
276	ECRs	SRR26898944	0	MuLow
277	ESMs	SRR26898944	0.460590413988533	MuLow
278	FBSs	SRR26898944	0.151559252322414	MuLow
279	HMSs	SRR26898944	0.143178852275755	MuLow
280	NCSs	SRR26898944	0.0403617994425207	MuLow
281	CBCs	SRR26898945	0.190415648879069	MuLow
282	CSSs	SRR26898945	0.0341894647632885	MuLow
283	ECRs	SRR26898945	0	MuLow
284	ESMs	SRR26898945	0.436228655026053	MuLow
285	FBSs	SRR26898945	0.146473681294223	MuLow
286	HMSs	SRR26898945	0.169037340969022	MuLow
287	NCSs	SRR26898945	0.0236552090683444	MuLow
288	CBCs	SRR26898946	0.33856370674881	MuLow
289	CSSs	SRR26898946	0.0245695153015055	MuLow
290	ECRs	SRR26898946	0	MuLow
291	ESMs	SRR26898946	0.27472557438453	MuLow
292	FBSs	SRR26898946	0.164559785866348	MuLow
293	HMSs	SRR26898946	0.197581417698807	MuLow
294	NCSs	SRR26898946	0	MuLow
295	CBCs	SRR26898947	0.379428720067833	MuLow
296	CSSs	SRR26898947	0.020331848270765	MuLow
297	ECRs	SRR26898947	0	MuLow
298	ESMs	SRR26898947	0.23513008037639	MuLow
299	FBSs	SRR26898947	0.165262656197132	MuLow
300	HMSs	SRR26898947	0.19984669508788	MuLow
301	NCSs	SRR26898947	0	MuLow
302	CBCs	SRR16350308	0.271765698551962	MuLow
303	CSSs	SRR16350308	0	MuLow
304	ECRs	SRR16350308	0.0751318817742941	MuLow
305	ESMs	SRR16350308	0.34392677608928	MuLow
306	FBSs	SRR16350308	0.183082506235561	MuLow
307	HMSs	SRR16350308	0	MuLow
308	NCSs	SRR16350308	0.126093137348903	MuLow
309	CBCs	SRR16350319	0.324369050980621	MuLow
310	CSSs	SRR16350319	0	MuLow
311	ECRs	SRR16350319	0.0805095019803561	MuLow
312	ESMs	SRR16350319	0.308566747813095	MuLow
313	FBSs	SRR16350319	0.229119778630469	MuLow
314	HMSs	SRR16350319	0	MuLow
315	NCSs	SRR16350319	0.0574349205954587	MuLow
316	CBCs	SRR16350320	0.288801635176622	MuLow
317	CSSs	SRR16350320	0	MuLow
318	ECRs	SRR16350320	0.0672855521238664	MuLow
319	ESMs	SRR16350320	0.345949295750086	MuLow
320	FBSs	SRR16350320	0.198353824430175	MuLow
321	HMSs	SRR16350320	0	MuLow
322	NCSs	SRR16350320	0.0996096925192516	MuLow
323	CBCs	SRR22421164	0.278496566583617	MuLow
324	CSSs	SRR22421164	0.0258890517163351	MuLow
325	ECRs	SRR22421164	0	MuLow
326	ESMs	SRR22421164	0.339753724992115	MuLow
327	FBSs	SRR22421164	0.167869580026426	MuLow
328	HMSs	SRR22421164	0.182468786325586	MuLow
329	NCSs	SRR22421164	0.00552229035592186	MuLow
330	CBCs	SRR22421165	0.393337329575137	MuLow
331	CSSs	SRR22421165	0.0175622279327223	MuLow
332	ECRs	SRR22421165	0	MuLow
333	ESMs	SRR22421165	0.215179611865415	MuLow
334	FBSs	SRR22421165	0.167353473975571	MuLow
335	HMSs	SRR22421165	0.206567356651154	MuLow
336	NCSs	SRR22421165	0	MuLow
337	CBCs	SRR22421166	0.364460276765926	MuLow
338	CSSs	SRR22421166	0.0186870790209873	MuLow
339	ECRs	SRR22421166	0	MuLow
340	ESMs	SRR22421166	0.246091263456084	MuLow
341	FBSs	SRR22421166	0.170975272245499	MuLow
342	HMSs	SRR22421166	0.199786108511504	MuLow
343	NCSs	SRR22421166	0	MuLow
344	CBCs	SRR27341416	0.285186010271647	MuLow
345	CSSs	SRR27341416	0.0661915237065481	MuLow
346	ECRs	SRR27341416	0	MuLow
347	ESMs	SRR27341416	0.331060526826606	MuLow
348	FBSs	SRR27341416	0.1515911704243	MuLow
349	HMSs	SRR27341416	0.1659707687709	MuLow
350	NCSs	SRR27341416	0	MuLow
351	CBCs	SRR27341417	0.281126340742216	MuLow
352	CSSs	SRR27341417	0.0686031012443988	MuLow
353	ECRs	SRR27341417	0	MuLow
354	ESMs	SRR27341417	0.336727169488877	MuLow
355	FBSs	SRR27341417	0.154198332302074	MuLow
356	HMSs	SRR27341417	0.159345056222434	MuLow
357	NCSs	SRR27341417	0	MuLow
358	CBCs	SRR27341418	0.299351298215184	MuLow
359	CSSs	SRR27341418	0.0660287373668805	MuLow
360	ECRs	SRR27341418	0	MuLow
361	ESMs	SRR27341418	0.31641837410077	MuLow
362	FBSs	SRR27341418	0.153499573633683	MuLow
363	HMSs	SRR27341418	0.164702016683482	MuLow
364	NCSs	SRR27341418	0	MuLow
365	CBCs	SRR21798272	0.399107198351695	MuLow
366	CSSs	SRR21798272	0	MuLow
367	ECRs	SRR21798272	0.0793065416156016	MuLow
368	ESMs	SRR21798272	0.247382428155594	MuLow
369	FBSs	SRR21798272	0.225958686612155	MuLow
370	HMSs	SRR21798272	0	MuLow
371	NCSs	SRR21798272	0.0482451452649551	MuLow
372	CBCs	SRR21798273	0.41771625344086	MuLow
373	CSSs	SRR21798273	0	MuLow
374	ECRs	SRR21798273	0.0768644852847173	MuLow
375	ESMs	SRR21798273	0.235051840482593	MuLow
376	FBSs	SRR21798273	0.2294360034148	MuLow
377	HMSs	SRR21798273	0	MuLow
378	NCSs	SRR21798273	0.0409314173770297	MuLow
379	CBCs	SRR21798274	0.437955303230865	MuLow
380	CSSs	SRR21798274	0	MuLow
381	ECRs	SRR21798274	0.0785939601435564	MuLow
382	ESMs	SRR21798274	0.219189752671841	MuLow
383	FBSs	SRR21798274	0.249167108110813	MuLow
384	HMSs	SRR21798274	0	MuLow
385	NCSs	SRR21798274	0.015093875842925	MuLow
