# Supplementary material for: A silkworm model reveals coordinated cellular communities and conserved Hippo regulation in silk production
Source: Research Square preprint supplement (doi:10.21203/rs.3.rs-7747598/v1), 2025-10-01
Supplement: Supplementary file 33 [file Supplementary Data 16.xlsx]

## Sheet: main
Supplementary Data 16. Bulk RNA-seq datasets used for the Scissor and CIBERSORTx analyses.
1	Used for Scissor
2	Used for CIBERSORTx

## Sheet: 1-Scissor
1	SRR1592737
2	SRR1592738
3	SRR1619431
4	SRR1619469
5	CRR084828
6	CRR084829
7	CRR084830
8	CRR084831
9	CRR084832
10	CRR084833
11	CRR084834
12	CRR084835
13	CRR084836
14	CRR084837
15	CRR084838
16	CRR084839
17	SRR1592681
18	SRR1592710
19	SRR8910706
20	SRR8910707
21	SRR8910708
22	SRR8910709
23	SRR8910710
24	SRR8910711
25	SRR8910712
26	SRR6516052
27	SRR6516053
28	SRR6516054
29	SRR6516055
30	SRR6516060
31	SRR6516061
32	SRR6516064
33	SRR6516065
34	SRR6002264
35	SRR6002265
36	SRR24187220
37	SRR24187221
38	SRR24187222
39	SRR24187227
40	SRR24187228
41	SRR24187229
42	SRR15522085
43	SRR22286487
44	SRR22286488
45	SRR22286489
46	SRR22286490
47	SRR26898934
48	SRR26898935
49	SRR26898936
50	SRR25433531
51	SRR25433532
52	SRR25433533
53	SRR25433534
54	SRR25433535
55	SRR25433536
56	CRR084814
57	CRR084815
58	CRR084816
59	CRR084817
60	CRR084818
61	CRR084819
62	CRR084820
63	CRR084821
64	CRR084822
65	CRR084823
66	CRR084824
67	CRR084825
68	CRR084826
69	CRR084827
70	SRR23385163
71	SRR23385164
72	SRR23385165
73	SRR23385166
74	SRR23385167
75	SRR23385168
76	SRR22421167
77	SRR22421168
78	SRR22421169
79	SRR27341413
80	SRR27341414
81	SRR27341415
82	SRR21798269
83	SRR21798270
84	SRR21798271
85	SRR15000411
86	SRR15000412
87	SRR15000413

## Sheet: 2-CIBERSORTx 
1	SRR1767680
2	SRR16350306
3	SRR16350307
4	SRR16350309
5	SRR16350310
6	SRR16350311
7	SRR16350313
8	SRR16350314
9	SRR16350315
10	SRR16350316
11	SRR16350317
12	SRR16350318
13	SRR22571454
14	SRR22571455
15	SRR22571456
16	SRR22571457
17	SRR6516056
18	SRR6516057
19	SRR6516058
20	SRR6516059
21	SRR6516062
22	SRR6516063
23	SRR6516066
24	SRR6002262
25	SRR6002263
26	SRR24187219
27	SRR24187223
28	SRR24187224
29	SRR24187225
30	SRR24187226
31	SRR24187230
32	SRR26898930
33	SRR26898931
34	SRR26898932
35	SRR26898933
36	SRR26898937
37	SRR26898941
38	SRR26898942
39	SRR26898943
40	SRR26898944
41	SRR26898945
42	SRR26898946
43	SRR26898947
44	SRR16350308
45	SRR16350319
46	SRR16350320
47	SRR22421164
48	SRR22421165
49	SRR22421166
50	SRR27341416
51	SRR27341417
52	SRR27341418
53	SRR21798272
54	SRR21798273
55	SRR21798274
