# Supplementary material for: A silkworm model reveals coordinated cellular communities and conserved Hippo regulation in silk production
Source: Research Square preprint supplement (doi:10.21203/rs.3.rs-7747598/v1), 2025-10-01
Supplement: Supplementary file 37 [file Supplementary Data 17.xlsx]

## Sheet: main
Supplementary Data 17. Gene sets related to the metabolism of xenobiotics by cytochrome P450, the ribosome pathway, fibroin genes and the Hippo signaling pathway.
1	Metabolism of xenobiotics by cytochrome P450
2	Ribosome pathway
3	fibroin genes
4	Hippo signaling pathway

## Sheet: 1-metabolism by cytochrome P45 
1	KWMTBOMO04061
2	KWMTBOMO06565
3	KWMTBOMO03300
4	KWMTBOMO04709
5	KWMTBOMO04062
6	KWMTBOMO12651
7	KWMTBOMO13242
8	KWMTBOMO15198
9	KWMTBOMO16421
10	KWMTBOMO04049
11	KWMTBOMO04051
12	KWMTBOMO04052
13	KWMTBOMO04050
14	KWMTBOMO16419
15	KWMTBOMO16418
16	KWMTBOMO16423
17	KWMTBOMO16413
18	KWMTBOMO00917
19	KWMTBOMO16416
20	KWMTBOMO16417
21	KWMTBOMO04486
22	KWMTBOMO04058
23	KWMTBOMO14759
24	KWMTBOMO14755
25	KWMTBOMO10971
26	KWMTBOMO10970
27	KWMTBOMO10968
28	KWMTBOMO10972
29	KWMTBOMO07079
30	KWMTBOMO07508
31	KWMTBOMO15290
32	KWMTBOMO16420
33	KWMTBOMO04488
34	KWMTBOMO00919
35	KWMTBOMO14756
36	KWMTBOMO16422
37	KWMTBOMO11356
38	KWMTBOMO05460
39	KWMTBOMO02945
40	KWMTBOMO10969
41	KWMTBOMO02076
42	KWMTBOMO12245
43	KWMTBOMO01607
44	KWMTBOMO08999
45	KWMTBOMO02879
46	KWMTBOMO15867
47	KWMTBOMO11295
48	KWMTBOMO03671
49	KWMTBOMO01502
50	KWMTBOMO04057
51	KWMTBOMO01503
52	KWMTBOMO03501
53	KWMTBOMO04064
54	KWMTBOMO06566
55	KWMTBOMO06567
56	KWMTBOMO15683
57	KWMTBOMO03670
58	KWMTBOMO14663
59	KWMTBOMO06377

## Sheet: 2-ribosome pathway
1	KWMTBOMO01068
2	KWMTBOMO10591
3	KWMTBOMO09231
4	KWMTBOMO15498
5	KWMTBOMO11085
6	KWMTBOMO02140
7	KWMTBOMO04712
8	KWMTBOMO06026
9	KWMTBOMO03666
10	KWMTBOMO03868
11	KWMTBOMO15274
12	KWMTBOMO11607
13	KWMTBOMO10723
14	KWMTBOMO11614
15	KWMTBOMO07760
16	KWMTBOMO10960
17	KWMTBOMO08767
18	KWMTBOMO02099
19	KWMTBOMO10324
20	KWMTBOMO07869
21	KWMTBOMO05791
22	KWMTBOMO02426
23	KWMTBOMO07727
24	KWMTBOMO02066
25	KWMTBOMO15848
26	KWMTBOMO12470
27	KWMTBOMO16195
28	KWMTBOMO12478
29	KWMTBOMO10898
30	KWMTBOMO09537
31	KWMTBOMO11555
32	KWMTBOMO16321
33	KWMTBOMO07815
34	KWMTBOMO09686
35	KWMTBOMO07419
36	KWMTBOMO15175
37	KWMTBOMO10248
38	KWMTBOMO08797
39	KWMTBOMO05979
40	KWMTBOMO16357
41	KWMTBOMO05280
42	KWMTBOMO09300
43	KWMTBOMO02006
44	KWMTBOMO06229
45	KWMTBOMO09442
46	KWMTBOMO11985
47	KWMTBOMO08699
48	KWMTBOMO08983
49	KWMTBOMO07200
50	KWMTBOMO09232
51	KWMTBOMO11678
52	KWMTBOMO02724
53	KWMTBOMO01273
54	KWMTBOMO06721
55	KWMTBOMO03314
56	KWMTBOMO12428
57	KWMTBOMO00974
58	KWMTBOMO12483
59	KWMTBOMO09876
60	KWMTBOMO01320
61	KWMTBOMO06480
62	KWMTBOMO13800
63	KWMTBOMO02477
64	KWMTBOMO08100
65	KWMTBOMO10509
66	KWMTBOMO00838
67	KWMTBOMO05675
68	KWMTBOMO05068
69	KWMTBOMO13569
70	KWMTBOMO04742
71	KWMTBOMO08399
72	KWMTBOMO08961
73	KWMTBOMO01941
74	KWMTBOMO09360
75	KWMTBOMO12706
76	KWMTBOMO13074
77	KWMTBOMO01381
78	KWMTBOMO08543
79	KWMTBOMO14169
80	KWMTBOMO13455
81	KWMTBOMO08894
82	KWMTBOMO12018
83	KWMTBOMO09205
84	KWMTBOMO11255
85	KWMTBOMO12460
86	KWMTBOMO02059
87	KWMTBOMO11021
88	KWMTBOMO08666
89	KWMTBOMO15114
90	KWMTBOMO03951
91	KWMTBOMO13859
92	KWMTBOMO07367
93	KWMTBOMO13070
94	KWMTBOMO08440
95	KWMTBOMO10211
96	KWMTBOMO01055
97	KWMTBOMO08064
98	KWMTBOMO07772
99	KWMTBOMO10049
100	KWMTBOMO07688
101	KWMTBOMO12497
102	KWMTBOMO11987
103	KWMTBOMO05723
104	KWMTBOMO15090
105	KWMTBOMO07547
106	KWMTBOMO15620
107	KWMTBOMO10686
108	KWMTBOMO12495
109	KWMTBOMO10547
110	KWMTBOMO09230
111	KWMTBOMO07888
112	KWMTBOMO14639
113	KWMTBOMO06974
114	KWMTBOMO13960
115	KWMTBOMO12287
116	KWMTBOMO05048

## Sheet: 3-fibroin genes
1	KWMTBOMO15365
2	KWMTBOMO08464
3	KWMTBOMO01001

## Sheet: 4-Hippo signaling pathway
1	KWMTBOMO01063
2	KWMTBOMO02380
3	KWMTBOMO02820
4	KWMTBOMO16159
5	KWMTBOMO04835
6	KWMTBOMO10174
7	KWMTBOMO10175
8	KWMTBOMO02440
9	KWMTBOMO06883
10	KWMTBOMO14224
11	KWMTBOMO14979
12	KWMTBOMO01147
13	KWMTBOMO14951
14	KWMTBOMO03175
15	KWMTBOMO02162
16	KWMTBOMO15593
17	KWMTBOMO16216
18	KWMTBOMO08031
19	KWMTBOMO05628
20	KWMTBOMO15768
21	KWMTBOMO15769
22	KWMTBOMO12815
23	KWMTBOMO10730
24	KWMTBOMO03624
25	KWMTBOMO10159
26	KWMTBOMO09197
27	KWMTBOMO07386
28	KWMTBOMO13602
29	KWMTBOMO07268
30	KWMTBOMO00173
31	KWMTBOMO05184
32	KWMTBOMO07994
33	KWMTBOMO11863
34	KWMTBOMO02766
35	KWMTBOMO09494
36	KWMTBOMO07201
37	KWMTBOMO07169
38	KWMTBOMO01563
39	KWMTBOMO08587
40	KWMTBOMO12846
41	KWMTBOMO03449
42	KWMTBOMO07045
43	KWMTBOMO15172
44	KWMTBOMO11427
45	KWMTBOMO08339
46	KWMTBOMO01124
47	KWMTBOMO10308
48	KWMTBOMO01771
49	KWMTBOMO02638
50	KWMTBOMO03013
51	KWMTBOMO09980
