# Supplementary material for: A silkworm model reveals coordinated cellular communities and conserved Hippo regulation in silk production
Source: Research Square preprint supplement (doi:10.21203/rs.3.rs-7747598/v1), 2025-10-01
Supplement: Supplementary file 41 [file Supplementary Data 18.xlsx]

## Sheet: main
Supplementary Data 18. Phenotype information of the bulk RNA-seq data used for the Scissor analysis.

## Sheet: Phenotype information
	Species	State
SRR1592737	B. mandarina	0
SRR1592738	B. mandarina	0
SRR1619431	B. mandarina	0
SRR1619469	B. mandarina	0
CRR084828	B. mandarina	0
CRR084829	B. mandarina	0
CRR084830	B. mandarina	0
CRR084831	B. mandarina	0
CRR084832	B. mandarina	0
CRR084833	B. mandarina	0
CRR084834	B. mandarina	0
CRR084835	B. mandarina	0
CRR084836	B. mandarina	0
CRR084837	B. mandarina	0
CRR084838	B. mandarina	0
CRR084839	B. mandarina	0
SRR1592681	B. mori	1
SRR1592710	B. mori	1
SRR8910706	B. mori	1
SRR8910707	B. mori	1
SRR8910708	B. mori	1
SRR8910709	B. mori	1
SRR8910710	B. mori	1
SRR8910711	B. mori	1
SRR8910712	B. mori	1
SRR6516052	B. mori	1
SRR6516053	B. mori	1
SRR6516054	B. mori	1
SRR6516055	B. mori	1
SRR6516060	B. mori	1
SRR6516061	B. mori	1
SRR6516064	B. mori	1
SRR6516065	B. mori	1
SRR6002264	B. mori	1
SRR6002265	B. mori	1
SRR24187220	B. mori	1
SRR24187221	B. mori	1
SRR24187222	B. mori	1
SRR24187227	B. mori	1
SRR24187228	B. mori	1
SRR24187229	B. mori	1
SRR15522085	B. mori	1
SRR22286487	B. mori	1
SRR22286488	B. mori	1
SRR22286489	B. mori	1
SRR22286490	B. mori	1
SRR26898934	B. mori	1
SRR26898935	B. mori	1
SRR26898936	B. mori	1
SRR25433531	B. mori	1
SRR25433532	B. mori	1
SRR25433533	B. mori	1
SRR25433534	B. mori	1
SRR25433535	B. mori	1
SRR25433536	B. mori	1
CRR084814	B. mori	1
CRR084815	B. mori	1
CRR084816	B. mori	1
CRR084817	B. mori	1
CRR084818	B. mori	1
CRR084819	B. mori	1
CRR084820	B. mori	1
CRR084821	B. mori	1
CRR084822	B. mori	1
CRR084823	B. mori	1
CRR084824	B. mori	1
CRR084825	B. mori	1
CRR084826	B. mori	1
CRR084827	B. mori	1
SRR23385163	B. mori	1
SRR23385164	B. mori	1
SRR23385165	B. mori	1
SRR23385166	B. mori	1
SRR23385167	B. mori	1
SRR23385168	B. mori	1
SRR22421167	B. mori	1
SRR22421168	B. mori	1
SRR22421169	B. mori	1
SRR27341413	B. mori	1
SRR27341414	B. mori	1
SRR27341415	B. mori	1
SRR21798269	B. mori	1
SRR21798270	B. mori	1
SRR21798271	B. mori	1
SRR15000411	B. mori	1
SRR15000412	B. mori	1
SRR15000413	B. mori	1
