# Supplementary material for: A silkworm model reveals coordinated cellular communities and conserved Hippo regulation in silk production
Source: Research Square preprint supplement (doi:10.21203/rs.3.rs-7747598/v1), 2025-10-01
Supplement: Supplementary file 45 [file Supplementary Data 19.xlsx]

## Sheet: main
Supplementary Data 19. TFs identified in the SG of B. mori.

## Sheet: TFs
	Silkbase_id
1	KWMTBOMO00024
2	KWMTBOMO00031
3	KWMTBOMO00050
4	KWMTBOMO00051
5	KWMTBOMO00061
6	KWMTBOMO00064
7	KWMTBOMO00089
8	KWMTBOMO00096
9	KWMTBOMO00111
10	KWMTBOMO00112
11	KWMTBOMO00151
12	KWMTBOMO00165
13	KWMTBOMO00166
14	KWMTBOMO00171
15	KWMTBOMO00203
16	KWMTBOMO00215
17	KWMTBOMO00220
18	KWMTBOMO00221
19	KWMTBOMO00245
20	KWMTBOMO00246
21	KWMTBOMO00276
22	KWMTBOMO00301
23	KWMTBOMO00314
24	KWMTBOMO00339
25	KWMTBOMO00351
26	KWMTBOMO00352
27	KWMTBOMO00363
28	KWMTBOMO00366
29	KWMTBOMO00379
30	KWMTBOMO00395
31	KWMTBOMO00398
32	KWMTBOMO00399
33	KWMTBOMO00402
34	KWMTBOMO00447
35	KWMTBOMO00449
36	KWMTBOMO00458
37	KWMTBOMO00493
38	KWMTBOMO00511
39	KWMTBOMO00518
40	KWMTBOMO00519
41	KWMTBOMO00584
42	KWMTBOMO00585
43	KWMTBOMO00589
44	KWMTBOMO00593
45	KWMTBOMO00628
46	KWMTBOMO00651
47	KWMTBOMO00654
48	KWMTBOMO00660
49	KWMTBOMO00678
50	KWMTBOMO00681
51	KWMTBOMO00682
52	KWMTBOMO00707
53	KWMTBOMO00714
54	KWMTBOMO00719
55	KWMTBOMO00720
56	KWMTBOMO00721
57	KWMTBOMO00774
58	KWMTBOMO00829
59	KWMTBOMO00833
60	KWMTBOMO00857
61	KWMTBOMO00859
62	KWMTBOMO00879
63	KWMTBOMO00902
64	KWMTBOMO00913
65	KWMTBOMO00914
66	KWMTBOMO00931
67	KWMTBOMO00934
68	KWMTBOMO00935
69	KWMTBOMO00936
70	KWMTBOMO00950
71	KWMTBOMO00955
72	KWMTBOMO00992
73	KWMTBOMO01034
74	KWMTBOMO01036
75	KWMTBOMO01078
76	KWMTBOMO01096
77	KWMTBOMO01119
78	KWMTBOMO01121
79	KWMTBOMO01122
80	KWMTBOMO01132
81	KWMTBOMO01186
82	KWMTBOMO01219
83	KWMTBOMO01220
84	KWMTBOMO01221
85	KWMTBOMO01222
86	KWMTBOMO01236
87	KWMTBOMO01265
88	KWMTBOMO01266
89	KWMTBOMO01318
90	KWMTBOMO01349
91	KWMTBOMO01350
92	KWMTBOMO01356
93	KWMTBOMO01357
94	KWMTBOMO01362
95	KWMTBOMO01363
96	KWMTBOMO01366
97	KWMTBOMO01389
98	KWMTBOMO01394
99	KWMTBOMO01395
100	KWMTBOMO01408
101	KWMTBOMO01412
102	KWMTBOMO01413
103	KWMTBOMO01414
104	KWMTBOMO01425
105	KWMTBOMO01444
106	KWMTBOMO01458
107	KWMTBOMO01468
108	KWMTBOMO01473
109	KWMTBOMO01625
110	KWMTBOMO01668
111	KWMTBOMO01671
112	KWMTBOMO01693
113	KWMTBOMO01701
114	KWMTBOMO01705
115	KWMTBOMO01737
116	KWMTBOMO01749
117	KWMTBOMO01758
118	KWMTBOMO01760
119	KWMTBOMO01762
120	KWMTBOMO01794
121	KWMTBOMO01827
122	KWMTBOMO01850
123	KWMTBOMO01855
124	KWMTBOMO01879
125	KWMTBOMO01948
126	KWMTBOMO01954
127	KWMTBOMO01956
128	KWMTBOMO01960
129	KWMTBOMO01993
130	KWMTBOMO02002
131	KWMTBOMO02012
132	KWMTBOMO02016
133	KWMTBOMO02033
134	KWMTBOMO02046
135	KWMTBOMO02050
136	KWMTBOMO02077
137	KWMTBOMO02100
138	KWMTBOMO02105
139	KWMTBOMO02106
140	KWMTBOMO02132
141	KWMTBOMO02186
142	KWMTBOMO02188
143	KWMTBOMO02189
144	KWMTBOMO02220
145	KWMTBOMO02229
146	KWMTBOMO02243
147	KWMTBOMO02244
148	KWMTBOMO02267
149	KWMTBOMO02272
150	KWMTBOMO02277
151	KWMTBOMO02290
152	KWMTBOMO02291
153	KWMTBOMO02292
154	KWMTBOMO02293
155	KWMTBOMO02310
156	KWMTBOMO02360
157	KWMTBOMO02380
158	KWMTBOMO02382
159	KWMTBOMO02385
160	KWMTBOMO02424
161	KWMTBOMO02473
162	KWMTBOMO02474
163	KWMTBOMO02502
164	KWMTBOMO02504
165	KWMTBOMO02509
166	KWMTBOMO02516
167	KWMTBOMO02574
168	KWMTBOMO02579
169	KWMTBOMO02719
170	KWMTBOMO02730
171	KWMTBOMO02734
172	KWMTBOMO02736
173	KWMTBOMO02738
174	KWMTBOMO02743
175	KWMTBOMO02748
176	KWMTBOMO02764
177	KWMTBOMO02772
178	KWMTBOMO02774
179	KWMTBOMO02790
180	KWMTBOMO02797
181	KWMTBOMO02820
182	KWMTBOMO02834
183	KWMTBOMO02858
184	KWMTBOMO02885
185	KWMTBOMO02915
186	KWMTBOMO02916
187	KWMTBOMO02926
188	KWMTBOMO02933
189	KWMTBOMO03091
190	KWMTBOMO03102
191	KWMTBOMO03119
192	KWMTBOMO03145
193	KWMTBOMO03202
194	KWMTBOMO03214
195	KWMTBOMO03217
196	KWMTBOMO03231
197	KWMTBOMO03238
198	KWMTBOMO03240
199	KWMTBOMO03268
200	KWMTBOMO03281
201	KWMTBOMO03283
202	KWMTBOMO03284
203	KWMTBOMO03288
204	KWMTBOMO03289
205	KWMTBOMO03297
206	KWMTBOMO03312
207	KWMTBOMO03318
208	KWMTBOMO03338
209	KWMTBOMO03339
210	KWMTBOMO03353
211	KWMTBOMO03357
212	KWMTBOMO03359
213	KWMTBOMO03360
214	KWMTBOMO03361
215	KWMTBOMO03362
216	KWMTBOMO03365
217	KWMTBOMO03366
218	KWMTBOMO03368
219	KWMTBOMO03369
220	KWMTBOMO03371
221	KWMTBOMO03372
222	KWMTBOMO03373
223	KWMTBOMO03376
224	KWMTBOMO03381
225	KWMTBOMO03391
226	KWMTBOMO03417
227	KWMTBOMO03418
228	KWMTBOMO03477
229	KWMTBOMO03624
230	KWMTBOMO03663
231	KWMTBOMO03664
232	KWMTBOMO03668
233	KWMTBOMO03679
234	KWMTBOMO03695
235	KWMTBOMO03749
236	KWMTBOMO03750
237	KWMTBOMO03752
238	KWMTBOMO03777
239	KWMTBOMO03788
240	KWMTBOMO03822
241	KWMTBOMO03850
242	KWMTBOMO03856
243	KWMTBOMO03869
244	KWMTBOMO03880
245	KWMTBOMO03979
246	KWMTBOMO04009
247	KWMTBOMO04021
248	KWMTBOMO04027
249	KWMTBOMO04041
250	KWMTBOMO04042
251	KWMTBOMO04084
252	KWMTBOMO04103
253	KWMTBOMO04106
254	KWMTBOMO04133
255	KWMTBOMO04166
256	KWMTBOMO04174
257	KWMTBOMO04184
258	KWMTBOMO04261
259	KWMTBOMO04306
260	KWMTBOMO04326
261	KWMTBOMO04332
262	KWMTBOMO04338
263	KWMTBOMO04365
264	KWMTBOMO04388
265	KWMTBOMO04407
266	KWMTBOMO04429
267	KWMTBOMO04442
268	KWMTBOMO04483
269	KWMTBOMO04507
270	KWMTBOMO04574
271	KWMTBOMO04591
272	KWMTBOMO04612
273	KWMTBOMO04634
274	KWMTBOMO04637
275	KWMTBOMO04674
276	KWMTBOMO04675
277	KWMTBOMO04677
278	KWMTBOMO04720
279	KWMTBOMO04721
280	KWMTBOMO04724
281	KWMTBOMO04744
282	KWMTBOMO04801
283	KWMTBOMO04908
284	KWMTBOMO04910
285	KWMTBOMO04947
286	KWMTBOMO04954
287	KWMTBOMO04995
288	KWMTBOMO05040
289	KWMTBOMO05058
290	KWMTBOMO05076
291	KWMTBOMO05079
292	KWMTBOMO05086
293	KWMTBOMO05143
294	KWMTBOMO05152
295	KWMTBOMO05170
296	KWMTBOMO05206
297	KWMTBOMO05232
298	KWMTBOMO05255
299	KWMTBOMO05269
300	KWMTBOMO05279
301	KWMTBOMO05366
302	KWMTBOMO05383
303	KWMTBOMO05404
304	KWMTBOMO05407
305	KWMTBOMO05418
306	KWMTBOMO05445
307	KWMTBOMO05461
308	KWMTBOMO05504
309	KWMTBOMO05533
310	KWMTBOMO05580
311	KWMTBOMO05605
312	KWMTBOMO05621
313	KWMTBOMO05671
314	KWMTBOMO05681
315	KWMTBOMO05716
316	KWMTBOMO05718
317	KWMTBOMO05747
318	KWMTBOMO05767
319	KWMTBOMO05807
320	KWMTBOMO05808
321	KWMTBOMO05819
322	KWMTBOMO05841
323	KWMTBOMO05846
324	KWMTBOMO05847
325	KWMTBOMO05890
326	KWMTBOMO05926
327	KWMTBOMO05951
328	KWMTBOMO05977
329	KWMTBOMO05989
330	KWMTBOMO06036
331	KWMTBOMO06037
332	KWMTBOMO06071
333	KWMTBOMO06074
334	KWMTBOMO06080
335	KWMTBOMO06085
336	KWMTBOMO06087
337	KWMTBOMO06089
338	KWMTBOMO06090
339	KWMTBOMO06092
340	KWMTBOMO06093
341	KWMTBOMO06117
342	KWMTBOMO06119
343	KWMTBOMO06120
344	KWMTBOMO06123
345	KWMTBOMO06125
346	KWMTBOMO06127
347	KWMTBOMO06128
348	KWMTBOMO06129
349	KWMTBOMO06130
350	KWMTBOMO06131
351	KWMTBOMO06133
352	KWMTBOMO06134
353	KWMTBOMO06167
354	KWMTBOMO06169
355	KWMTBOMO06185
356	KWMTBOMO06186
357	KWMTBOMO06187
358	KWMTBOMO06189
359	KWMTBOMO06191
360	KWMTBOMO06192
361	KWMTBOMO06193
362	KWMTBOMO06194
363	KWMTBOMO06195
364	KWMTBOMO06196
365	KWMTBOMO06200
366	KWMTBOMO06201
367	KWMTBOMO06202
368	KWMTBOMO06203
369	KWMTBOMO06205
370	KWMTBOMO06207
371	KWMTBOMO06219
372	KWMTBOMO06240
373	KWMTBOMO06241
374	KWMTBOMO06247
375	KWMTBOMO06250
376	KWMTBOMO06256
377	KWMTBOMO06264
378	KWMTBOMO06269
379	KWMTBOMO06276
380	KWMTBOMO06288
381	KWMTBOMO06310
382	KWMTBOMO06338
383	KWMTBOMO06339
384	KWMTBOMO06340
385	KWMTBOMO06342
386	KWMTBOMO06372
387	KWMTBOMO06403
388	KWMTBOMO06455
389	KWMTBOMO06479
390	KWMTBOMO06536
391	KWMTBOMO06556
392	KWMTBOMO06559
393	KWMTBOMO06584
394	KWMTBOMO06713
395	KWMTBOMO06717
396	KWMTBOMO06739
397	KWMTBOMO06745
398	KWMTBOMO06747
399	KWMTBOMO06767
400	KWMTBOMO06821
401	KWMTBOMO06852
402	KWMTBOMO06883
403	KWMTBOMO06920
404	KWMTBOMO06921
405	KWMTBOMO06924
406	KWMTBOMO06958
407	KWMTBOMO06968
408	KWMTBOMO06969
409	KWMTBOMO06982
410	KWMTBOMO06993
411	KWMTBOMO07048
412	KWMTBOMO07055
413	KWMTBOMO07058
414	KWMTBOMO07077
415	KWMTBOMO07091
416	KWMTBOMO07092
417	KWMTBOMO07110
418	KWMTBOMO07115
419	KWMTBOMO07186
420	KWMTBOMO07222
421	KWMTBOMO07223
422	KWMTBOMO07225
423	KWMTBOMO07252
424	KWMTBOMO07265
425	KWMTBOMO07338
426	KWMTBOMO07379
427	KWMTBOMO07389
428	KWMTBOMO07392
429	KWMTBOMO07397
430	KWMTBOMO07403
431	KWMTBOMO07416
432	KWMTBOMO07464
433	KWMTBOMO07505
434	KWMTBOMO07506
435	KWMTBOMO07507
436	KWMTBOMO07551
437	KWMTBOMO07613
438	KWMTBOMO07638
439	KWMTBOMO07709
440	KWMTBOMO07730
441	KWMTBOMO07731
442	KWMTBOMO07734
443	KWMTBOMO07735
444	KWMTBOMO07782
445	KWMTBOMO07793
446	KWMTBOMO07798
447	KWMTBOMO07825
448	KWMTBOMO07831
449	KWMTBOMO07843
450	KWMTBOMO07844
451	KWMTBOMO07861
452	KWMTBOMO07863
453	KWMTBOMO07910
454	KWMTBOMO07931
455	KWMTBOMO07945
456	KWMTBOMO07973
457	KWMTBOMO07974
458	KWMTBOMO07975
459	KWMTBOMO07976
460	KWMTBOMO08001
461	KWMTBOMO08005
462	KWMTBOMO08022
463	KWMTBOMO08031
464	KWMTBOMO08128
465	KWMTBOMO08131
466	KWMTBOMO08165
467	KWMTBOMO08171
468	KWMTBOMO08173
469	KWMTBOMO08179
470	KWMTBOMO08272
471	KWMTBOMO08275
472	KWMTBOMO08283
473	KWMTBOMO08295
474	KWMTBOMO08297
475	KWMTBOMO08307
476	KWMTBOMO08328
477	KWMTBOMO08361
478	KWMTBOMO08398
479	KWMTBOMO08403
480	KWMTBOMO08406
481	KWMTBOMO08471
482	KWMTBOMO08507
483	KWMTBOMO08511
484	KWMTBOMO08577
485	KWMTBOMO08597
486	KWMTBOMO08598
487	KWMTBOMO08603
488	KWMTBOMO08612
489	KWMTBOMO08619
490	KWMTBOMO08651
491	KWMTBOMO08662
492	KWMTBOMO08664
493	KWMTBOMO08696
494	KWMTBOMO08718
495	KWMTBOMO08723
496	KWMTBOMO08726
497	KWMTBOMO08766
498	KWMTBOMO08770
499	KWMTBOMO08777
500	KWMTBOMO08794
501	KWMTBOMO08795
502	KWMTBOMO08800
503	KWMTBOMO08812
504	KWMTBOMO08821
505	KWMTBOMO08824
506	KWMTBOMO08827
507	KWMTBOMO08847
508	KWMTBOMO08863
509	KWMTBOMO08866
510	KWMTBOMO08933
511	KWMTBOMO08935
512	KWMTBOMO08936
513	KWMTBOMO08947
514	KWMTBOMO08958
515	KWMTBOMO08984
516	KWMTBOMO09004
517	KWMTBOMO09006
518	KWMTBOMO09010
519	KWMTBOMO09011
520	KWMTBOMO09013
521	KWMTBOMO09032
522	KWMTBOMO09109
523	KWMTBOMO09116
524	KWMTBOMO09123
525	KWMTBOMO09213
526	KWMTBOMO09226
527	KWMTBOMO09235
528	KWMTBOMO09238
529	KWMTBOMO09258
530	KWMTBOMO09272
531	KWMTBOMO09296
532	KWMTBOMO09301
533	KWMTBOMO09364
534	KWMTBOMO09366
535	KWMTBOMO09368
536	KWMTBOMO09369
537	KWMTBOMO09382
538	KWMTBOMO09428
539	KWMTBOMO09441
540	KWMTBOMO09450
541	KWMTBOMO09472
542	KWMTBOMO09500
543	KWMTBOMO09501
544	KWMTBOMO09509
545	KWMTBOMO09534
546	KWMTBOMO09557
547	KWMTBOMO09611
548	KWMTBOMO09619
549	KWMTBOMO09628
550	KWMTBOMO09637
551	KWMTBOMO09738
552	KWMTBOMO09739
553	KWMTBOMO09740
554	KWMTBOMO09744
555	KWMTBOMO09753
556	KWMTBOMO09786
557	KWMTBOMO09806
558	KWMTBOMO09820
559	KWMTBOMO09826
560	KWMTBOMO09828
561	KWMTBOMO09840
562	KWMTBOMO09880
563	KWMTBOMO09924
564	KWMTBOMO09933
565	KWMTBOMO09956
566	KWMTBOMO09977
567	KWMTBOMO09982
568	KWMTBOMO10003
569	KWMTBOMO10004
570	KWMTBOMO10087
571	KWMTBOMO10089
572	KWMTBOMO10090
573	KWMTBOMO10150
574	KWMTBOMO10151
575	KWMTBOMO10159
576	KWMTBOMO10170
577	KWMTBOMO10171
578	KWMTBOMO10172
579	KWMTBOMO10182
580	KWMTBOMO10214
581	KWMTBOMO10218
582	KWMTBOMO10302
583	KWMTBOMO10307
584	KWMTBOMO10331
585	KWMTBOMO10413
586	KWMTBOMO10414
587	KWMTBOMO10421
588	KWMTBOMO10429
589	KWMTBOMO10440
590	KWMTBOMO10441
591	KWMTBOMO10472
592	KWMTBOMO10487
593	KWMTBOMO10528
594	KWMTBOMO10539
595	KWMTBOMO10592
596	KWMTBOMO10630
597	KWMTBOMO10656
598	KWMTBOMO10677
599	KWMTBOMO10681
600	KWMTBOMO10682
601	KWMTBOMO10684
602	KWMTBOMO10685
603	KWMTBOMO10712
604	KWMTBOMO10721
605	KWMTBOMO10738
606	KWMTBOMO10777
607	KWMTBOMO10783
608	KWMTBOMO10786
609	KWMTBOMO10815
610	KWMTBOMO10837
611	KWMTBOMO10839
612	KWMTBOMO10840
613	KWMTBOMO10847
614	KWMTBOMO10848
615	KWMTBOMO10893
616	KWMTBOMO10906
617	KWMTBOMO10947
618	KWMTBOMO10954
619	KWMTBOMO10989
620	KWMTBOMO10990
621	KWMTBOMO11010
622	KWMTBOMO11030
623	KWMTBOMO11044
624	KWMTBOMO11050
625	KWMTBOMO11063
626	KWMTBOMO11087
627	KWMTBOMO11248
628	KWMTBOMO11257
629	KWMTBOMO11294
630	KWMTBOMO11400
631	KWMTBOMO11408
632	KWMTBOMO11425
633	KWMTBOMO11491
634	KWMTBOMO11567
635	KWMTBOMO11568
636	KWMTBOMO11600
637	KWMTBOMO11631
638	KWMTBOMO11650
639	KWMTBOMO11664
640	KWMTBOMO11697
641	KWMTBOMO11717
642	KWMTBOMO11732
643	KWMTBOMO11744
644	KWMTBOMO11747
645	KWMTBOMO11757
646	KWMTBOMO11822
647	KWMTBOMO11827
648	KWMTBOMO11839
649	KWMTBOMO11840
650	KWMTBOMO11841
651	KWMTBOMO11842
652	KWMTBOMO11917
653	KWMTBOMO11957
654	KWMTBOMO11983
655	KWMTBOMO11999
656	KWMTBOMO12007
657	KWMTBOMO12020
658	KWMTBOMO12021
659	KWMTBOMO12077
660	KWMTBOMO12079
661	KWMTBOMO12084
662	KWMTBOMO12108
663	KWMTBOMO12196
664	KWMTBOMO12206
665	KWMTBOMO12458
666	KWMTBOMO12525
667	KWMTBOMO12612
668	KWMTBOMO12616
669	KWMTBOMO12619
670	KWMTBOMO12655
671	KWMTBOMO12657
672	KWMTBOMO12662
673	KWMTBOMO12689
674	KWMTBOMO12696
675	KWMTBOMO12710
676	KWMTBOMO12727
677	KWMTBOMO12729
678	KWMTBOMO12738
679	KWMTBOMO12770
680	KWMTBOMO12814
681	KWMTBOMO12836
682	KWMTBOMO12859
683	KWMTBOMO12906
684	KWMTBOMO12908
685	KWMTBOMO12961
686	KWMTBOMO12968
687	KWMTBOMO13054
688	KWMTBOMO13080
689	KWMTBOMO13118
690	KWMTBOMO13123
691	KWMTBOMO13124
692	KWMTBOMO13125
693	KWMTBOMO13133
694	KWMTBOMO13185
695	KWMTBOMO13187
696	KWMTBOMO13189
697	KWMTBOMO13192
698	KWMTBOMO13303
699	KWMTBOMO13309
700	KWMTBOMO13328
701	KWMTBOMO13333
702	KWMTBOMO13366
703	KWMTBOMO13404
704	KWMTBOMO13419
705	KWMTBOMO13456
706	KWMTBOMO13459
707	KWMTBOMO13464
708	KWMTBOMO13545
709	KWMTBOMO13575
710	KWMTBOMO13577
711	KWMTBOMO13720
712	KWMTBOMO13726
713	KWMTBOMO13731
714	KWMTBOMO13733
715	KWMTBOMO13737
716	KWMTBOMO13740
717	KWMTBOMO13769
718	KWMTBOMO13776
719	KWMTBOMO13785
720	KWMTBOMO13837
721	KWMTBOMO13845
722	KWMTBOMO13888
723	KWMTBOMO13931
724	KWMTBOMO13933
725	KWMTBOMO13953
726	KWMTBOMO13964
727	KWMTBOMO14012
728	KWMTBOMO14022
729	KWMTBOMO14023
730	KWMTBOMO14025
731	KWMTBOMO14040
732	KWMTBOMO14053
733	KWMTBOMO14119
734	KWMTBOMO14120
735	KWMTBOMO14133
736	KWMTBOMO14150
737	KWMTBOMO14151
738	KWMTBOMO14159
739	KWMTBOMO14162
740	KWMTBOMO14176
741	KWMTBOMO14180
742	KWMTBOMO14207
743	KWMTBOMO14225
744	KWMTBOMO14226
745	KWMTBOMO14232
746	KWMTBOMO14273
747	KWMTBOMO14274
748	KWMTBOMO14284
749	KWMTBOMO14285
750	KWMTBOMO14303
751	KWMTBOMO14310
752	KWMTBOMO14345
753	KWMTBOMO14349
754	KWMTBOMO14364
755	KWMTBOMO14365
756	KWMTBOMO14384
757	KWMTBOMO14437
758	KWMTBOMO14445
759	KWMTBOMO14448
760	KWMTBOMO14449
761	KWMTBOMO14466
762	KWMTBOMO14484
763	KWMTBOMO14488
764	KWMTBOMO14524
765	KWMTBOMO14535
766	KWMTBOMO14537
767	KWMTBOMO14555
768	KWMTBOMO14565
769	KWMTBOMO14572
770	KWMTBOMO14573
771	KWMTBOMO14574
772	KWMTBOMO14576
773	KWMTBOMO14578
774	KWMTBOMO14579
775	KWMTBOMO14580
776	KWMTBOMO14581
777	KWMTBOMO14583
778	KWMTBOMO14585
779	KWMTBOMO14586
780	KWMTBOMO14587
781	KWMTBOMO14590
782	KWMTBOMO14591
783	KWMTBOMO14592
784	KWMTBOMO14593
785	KWMTBOMO14594
786	KWMTBOMO14596
787	KWMTBOMO14598
788	KWMTBOMO14601
789	KWMTBOMO14604
790	KWMTBOMO14605
791	KWMTBOMO14607
792	KWMTBOMO14626
793	KWMTBOMO14662
794	KWMTBOMO14682
795	KWMTBOMO14744
796	KWMTBOMO14748
797	KWMTBOMO14750
798	KWMTBOMO14753
799	KWMTBOMO14768
800	KWMTBOMO14794
801	KWMTBOMO14816
802	KWMTBOMO14837
803	KWMTBOMO14838
804	KWMTBOMO14855
805	KWMTBOMO14869
806	KWMTBOMO14886
807	KWMTBOMO14890
808	KWMTBOMO14891
809	KWMTBOMO14892
810	KWMTBOMO14895
811	KWMTBOMO14897
812	KWMTBOMO14913
813	KWMTBOMO14923
814	KWMTBOMO14948
815	KWMTBOMO14977
816	KWMTBOMO14979
817	KWMTBOMO14989
818	KWMTBOMO15047
819	KWMTBOMO15061
820	KWMTBOMO15102
821	KWMTBOMO15130
822	KWMTBOMO15132
823	KWMTBOMO15161
824	KWMTBOMO15162
825	KWMTBOMO15178
826	KWMTBOMO15181
827	KWMTBOMO15188
828	KWMTBOMO15201
829	KWMTBOMO15203
830	KWMTBOMO15211
831	KWMTBOMO15212
832	KWMTBOMO15220
833	KWMTBOMO15249
834	KWMTBOMO15317
835	KWMTBOMO15319
836	KWMTBOMO15329
837	KWMTBOMO15340
838	KWMTBOMO15363
839	KWMTBOMO15368
840	KWMTBOMO15373
841	KWMTBOMO15377
842	KWMTBOMO15391
843	KWMTBOMO15394
844	KWMTBOMO15395
845	KWMTBOMO15402
846	KWMTBOMO15408
847	KWMTBOMO15479
848	KWMTBOMO15556
849	KWMTBOMO15563
850	KWMTBOMO15599
851	KWMTBOMO15602
852	KWMTBOMO15603
853	KWMTBOMO15605
854	KWMTBOMO15606
855	KWMTBOMO15608
856	KWMTBOMO15609
857	KWMTBOMO15619
858	KWMTBOMO15627
859	KWMTBOMO15632
860	KWMTBOMO15633
861	KWMTBOMO15637
862	KWMTBOMO15640
863	KWMTBOMO15644
864	KWMTBOMO15645
865	KWMTBOMO15654
866	KWMTBOMO15655
867	KWMTBOMO15674
868	KWMTBOMO15713
869	KWMTBOMO15767
870	KWMTBOMO15776
871	KWMTBOMO15794
872	KWMTBOMO15856
873	KWMTBOMO15862
874	KWMTBOMO15864
875	KWMTBOMO15866
876	KWMTBOMO15931
877	KWMTBOMO15935
878	KWMTBOMO15936
879	KWMTBOMO15943
880	KWMTBOMO15960
881	KWMTBOMO15965
882	KWMTBOMO16016
883	KWMTBOMO16025
884	KWMTBOMO16036
885	KWMTBOMO16041
886	KWMTBOMO16044
887	KWMTBOMO16058
888	KWMTBOMO16059
889	KWMTBOMO16060
890	KWMTBOMO16068
891	KWMTBOMO16070
892	KWMTBOMO16083
893	KWMTBOMO16084
894	KWMTBOMO16127
895	KWMTBOMO16158
896	KWMTBOMO16160
897	KWMTBOMO16163
898	KWMTBOMO16182
899	KWMTBOMO16231
900	KWMTBOMO16254
901	KWMTBOMO16264
902	KWMTBOMO16350
903	KWMTBOMO16390
904	KWMTBOMO16407
905	KWMTBOMO16431
906	KWMTBOMO16435
907	KWMTBOMO16452
908	KWMTBOMO16476
909	KWMTBOMO16482
910	KWMTBOMO16483
911	KWMTBOMO16491
912	KWMTBOMO16507
913	KWMTBOMO16514
914	KWMTBOMO16519
915	KWMTBOMO16531
916	KWMTBOMO16561
917	KWMTBOMO16562
918	KWMTBOMO16569
919	KWMTBOMO16570
920	KWMTBOMO16571
921	KWMTBOMO16572
922	KWMTBOMO16577
923	KWMTBOMO16597
924	KWMTBOMO16627
925	KWMTBOMO16629
926	KWMTBOMO16643
927	KWMTBOMO16649
928	KWMTBOMO16653
929	KWMTBOMO16656
930	KWMTBOMO16668
931	KWMTBOMO16721
932	KWMTBOMO16751
933	KWMTBOMO16788
934	KWMTBOMO16816
935	KWMTBOMO16831
936	KWMTBOMO16836
937	KWMTBOMO16851
938	KWMTBOMO16869
939	KWMTBOMO16879
