# Supplementary material for: A silkworm model reveals coordinated cellular communities and conserved Hippo regulation in silk production
Source: Research Square preprint supplement (doi:10.21203/rs.3.rs-7747598/v1), 2025-10-01
Supplement: Supplementary file 49 [file Supplementary Data 2.xlsx]

## Sheet: main
Supplementary Data 2. Numbers of Scissor+/Scissor- cells in each sample and cell type.
1	sample
2	cell type

## Sheet: Sample
	B. mori_L5D3	B. mori_L5D5	B. mandarina_L5D6
Scissor+ cells	1556	959	34
Scissor- cells	303	287	1027
Bacground cells	18178	13526	3607

## Sheet: Cell type
	CBCs	ESMs	ECRs	NCSs	CSSs	FBSs	HMSs
Scissor+ cells	431	968	2	141	821	117	69
Scissor- cells	403	50	0	709	226	226	3
Bacground cells	11231	13169	29	3248	1231	6152	251
