# Supplementary material for: A silkworm model reveals coordinated cellular communities and conserved Hippo regulation in silk production
Source: Research Square preprint supplement (doi:10.21203/rs.3.rs-7747598/v1), 2025-10-01
Supplement: Supplementary file 53 [file Supplementary Data 3.xlsx]

## Sheet: main
Supplementary Data 3. DEGs identified in Scissor+ cells.
1	CBCs
2	ESMs
3	NCSs
4	CSSs
5	all Scissor+ cells

## Sheet: 1-CBCs
gene_name	p_val	avg_log2FC	pct.1	pct.2	p_val_adj	CellType	Compare
KWMTBOMO13619	5.699787395508e-05	8.96666511027709	0.039	0	0.962124112361751	CBCs	Scissor_pos_VS_Scissor_neg
KWMTBOMO06216	5.37356924209304e-15	8.50092146836642	0.223	0.045	9.07058488065305e-11	CBCs	Scissor_pos_VS_Scissor_neg
KWMTBOMO11817	2.42936712840085e-06	7.75237321664839	0.1	0.022	0.0410077171274064	CBCs	Scissor_pos_VS_Scissor_neg
KWMTBOMO08318	0.00109929736996223	7.26531732585207	0.032	0.002	1	CBCs	Scissor_pos_VS_Scissor_neg
KWMTBOMO09802	1.23787779445527e-23	6.99997539052807	0.227	0.002	2.0895377170405e-19	CBCs	Scissor_pos_VS_Scissor_neg
KWMTBOMO06311	0.00144355216079953	6.68235702502275	0.046	0.01	1	CBCs	Scissor_pos_VS_Scissor_neg
KWMTBOMO09262	3.21321270645059e-12	6.56052625255957	0.114	0	5.4239030484886e-08	CBCs	Scissor_pos_VS_Scissor_neg
KWMTBOMO03537	0.00125670853047866	6.26719797866961	0.026	0	1	CBCs	Scissor_pos_VS_Scissor_neg
KWMTBOMO03422	0.00361825824276788	6.26074922888951	0.032	0.005	1	CBCs	Scissor_pos_VS_Scissor_neg
KWMTBOMO00823	0.000446356607575778	6.12220251785994	0.03	0	1	CBCs	Scissor_pos_VS_Scissor_neg
KWMTBOMO16125	5.12292802159951e-69	5.96879873437825	0.615	0.045	8.64750250045997e-65	CBCs	Scissor_pos_VS_Scissor_neg
KWMTBOMO02539	0.000542799999656335	5.69694180836699	0.046	0.007	1	CBCs	Scissor_pos_VS_Scissor_neg
KWMTBOMO16051	8.21062563221159e-07	5.67259108923102	0.065	0.002	0.0138595360671732	CBCs	Scissor_pos_VS_Scissor_neg
KWMTBOMO03035	0.0302854399528515	5.62216875730787	0.012	0	1	CBCs	Scissor_pos_VS_Scissor_neg
KWMTBOMO04682	9.7917620370767e-33	5.59751579719489	0.327	0.012	1.65284943185855e-28	CBCs	Scissor_pos_VS_Scissor_neg
KWMTBOMO10145	6.52802592261606e-08	5.53588040117049	0.093	0.01	0.00110193077573759	CBCs	Scissor_pos_VS_Scissor_neg
KWMTBOMO04644	5.56637687179602e-31	5.5199111321916	0.32	0.017	9.39604415959169e-27	CBCs	Scissor_pos_VS_Scissor_neg
KWMTBOMO14524	0.000159297526334512	5.51002500922165	0.035	0	1	CBCs	Scissor_pos_VS_Scissor_neg
KWMTBOMO13147	9.52664666444199e-05	5.49031505146417	0.037	0	1	CBCs	Scissor_pos_VS_Scissor_neg
KWMTBOMO00971	0.00110903287433181	5.41976514681504	0.032	0.002	1	CBCs	Scissor_pos_VS_Scissor_neg
KWMTBOMO00973	0.00183816362082275	5.40183156013022	0.03	0.002	1	CBCs	Scissor_pos_VS_Scissor_neg
KWMTBOMO10267	3.94226787537862e-15	5.29467417229518	0.16	0.007	6.65454817363911e-11	CBCs	Scissor_pos_VS_Scissor_neg
KWMTBOMO14940	2.33969664722294e-06	5.25233362793396	0.06	0.002	0.0394940794051231	CBCs	Scissor_pos_VS_Scissor_neg
KWMTBOMO00355	1.4252015897222e-06	5.24293491208083	0.079	0.01	0.0240574028345108	CBCs	Scissor_pos_VS_Scissor_neg
KWMTBOMO08292	4.64712886243522e-36	5.15114637425275	0.362	0.017	7.84435351979064e-32	CBCs	Scissor_pos_VS_Scissor_neg
KWMTBOMO12431	1.03131537203286e-08	5.13959158769476	0.09	0.005	0.000174086034799146	CBCs	Scissor_pos_VS_Scissor_neg
KWMTBOMO07701	1.65203264763689e-05	5.12664536215896	0.063	0.007	0.278863110921106	CBCs	Scissor_pos_VS_Scissor_neg
KWMTBOMO13517	0.00613869898597124	5.11315030430194	0.035	0.007	1	CBCs	Scissor_pos_VS_Scissor_neg
KWMTBOMO04643	2.12208559677508e-46	5.08431775884269	0.494	0.067	3.58208048735633e-42	CBCs	Scissor_pos_VS_Scissor_neg
KWMTBOMO15816	0.0697747317362809	5.0755383872897	0.019	0.005	1	CBCs	Scissor_pos_VS_Scissor_neg
KWMTBOMO10016	2.76393541588348e-37	5.0736144169379	0.36	0.01	4.66552298201132e-33	CBCs	Scissor_pos_VS_Scissor_neg
KWMTBOMO13471	0.0021145652843118	5.06025755391511	0.023	0	1	CBCs	Scissor_pos_VS_Scissor_neg
KWMTBOMO05947	0.00074837974451262	5.05407619179815	0.028	0	1	CBCs	Scissor_pos_VS_Scissor_neg
KWMTBOMO16126	9.6050713810973e-96	5.05400332580381	0.826	0.181	1.62133604912922e-91	CBCs	Scissor_pos_VS_Scissor_neg
KWMTBOMO04166	0.000141108777879439	5.03028324535851	0.042	0.002	1	CBCs	Scissor_pos_VS_Scissor_neg
KWMTBOMO12218	9.09312849612167e-09	4.9874388418753	0.107	0.012	0.000153492009014534	CBCs	Scissor_pos_VS_Scissor_neg
KWMTBOMO05451	2.04160335346513e-05	4.96176153942646	0.044	0	0.344622646064914	CBCs	Scissor_pos_VS_Scissor_neg
KWMTBOMO04133	0.000446356607575778	4.94480393843174	0.03	0	1	CBCs	Scissor_pos_VS_Scissor_neg
KWMTBOMO04920	0.11870659584091	4.94090321359311	0.012	0.002	1	CBCs	Scissor_pos_VS_Scissor_neg
KWMTBOMO05210	2.38773110536527e-28	4.91737060498355	0.295	0.015	4.03049010585657e-24	CBCs	Scissor_pos_VS_Scissor_neg
KWMTBOMO13606	1.02560138291324e-15	4.86617	0.23	0.045	1.73121513435755e-11	CBCs	Scissor_pos_VS_Scissor_neg
KWMTBOMO15549	0.0021145652843118	4.85014003001065	0.023	0	1	CBCs	Scissor_pos_VS_Scissor_neg
KWMTBOMO00505	0.00183816362082275	4.82978465656316	0.03	0.002	1	CBCs	Scissor_pos_VS_Scissor_neg
KWMTBOMO05904	3.88263715917512e-06	4.81134975766153	0.058	0.002	0.065538915246876	CBCs	Scissor_pos_VS_Scissor_neg
KWMTBOMO03713	8.29439422836343e-20	4.76834599029288	0.26	0.04	1.40009374574775e-15	CBCs	Scissor_pos_VS_Scissor_neg
KWMTBOMO03280	3.31320730962285e-39	4.7431830662324	0.492	0.109	5.59269393864338e-35	CBCs	Scissor_pos_VS_Scissor_neg
KWMTBOMO07702	0.00356730598030463	4.7225345131593	0.021	0	1	CBCs	Scissor_pos_VS_Scissor_neg
KWMTBOMO03508	0.00074837974451262	4.70111447001453	0.028	0	1	CBCs	Scissor_pos_VS_Scissor_neg
KWMTBOMO01538	2.52857235006969e-42	4.68741636404524	0.652	0.362	4.26823012691763e-38	CBCs	Scissor_pos_VS_Scissor_neg
KWMTBOMO04134	1.79933417575994e-09	4.68740441496583	0.093	0.002	3.03727608868278e-05	CBCs	Scissor_pos_VS_Scissor_neg
KWMTBOMO11245	0.0175619753015271	4.68104666892406	0.014	0	1	CBCs	Scissor_pos_VS_Scissor_neg
KWMTBOMO09443	0.00109929736996223	4.67199493963768	0.032	0.002	1	CBCs	Scissor_pos_VS_Scissor_neg
KWMTBOMO02194	3.06664095883841e-07	4.66650747595215	0.07	0.002	0.00517648993851924	CBCs	Scissor_pos_VS_Scissor_neg
KWMTBOMO01543	0.0560150198234352	4.63351898317544	0.028	0.01	1	CBCs	Scissor_pos_VS_Scissor_neg
KWMTBOMO07664	0.0102673972666825	4.59639169339029	0.016	0	1	CBCs	Scissor_pos_VS_Scissor_neg
KWMTBOMO16605	9.64261638797463e-48	4.55928368156049	0.48	0.037	1.62767364629012e-43	CBCs	Scissor_pos_VS_Scissor_neg
KWMTBOMO11865	0.0102673972666825	4.55643906951816	0.016	0	1	CBCs	Scissor_pos_VS_Scissor_neg
KWMTBOMO01218	2.6409482391802e-06	4.51869232228684	0.081	0.012	0.0445792062773618	CBCs	Scissor_pos_VS_Scissor_neg
KWMTBOMO04797	0.000900796121587958	4.50598501774077	0.044	0.007	1	CBCs	Scissor_pos_VS_Scissor_neg
KWMTBOMO07637	0.00864036650257211	4.50063247246585	0.023	0.002	1	CBCs	Scissor_pos_VS_Scissor_neg
KWMTBOMO07756	6.46167377518037e-05	4.49708015910057	0.051	0.005	1	CBCs	Scissor_pos_VS_Scissor_neg
KWMTBOMO08319	0.11870659584091	4.49457970114453	0.012	0.002	1	CBCs	Scissor_pos_VS_Scissor_neg
KWMTBOMO10575	0.0175619753015271	4.45867662641797	0.014	0	1	CBCs	Scissor_pos_VS_Scissor_neg
KWMTBOMO04375	0.00234262116231335	4.39011082007724	0.044	0.01	1	CBCs	Scissor_pos_VS_Scissor_neg
KWMTBOMO07981	0.00371223890725057	4.32434473964592	0.058	0.02	1	CBCs	Scissor_pos_VS_Scissor_neg
KWMTBOMO15882	0.00515197517627048	4.32003670043505	0.026	0.002	1	CBCs	Scissor_pos_VS_Scissor_neg
KWMTBOMO05535	0.11870659584091	4.30606584518698	0.012	0.002	1	CBCs	Scissor_pos_VS_Scissor_neg
KWMTBOMO06495	0.0145144146931957	4.30563322008848	0.021	0.002	1	CBCs	Scissor_pos_VS_Scissor_neg
KWMTBOMO01102	0.0698214809286295	4.28222444010124	0.014	0.002	1	CBCs	Scissor_pos_VS_Scissor_neg
KWMTBOMO10384	0.000111877558282391	4.24041773794239	0.049	0.005	1	CBCs	Scissor_pos_VS_Scissor_neg
KWMTBOMO05046	1.00177087947341e-13	4.23975611845631	0.218	0.05	1.69098924455112e-09	CBCs	Scissor_pos_VS_Scissor_neg
KWMTBOMO13236	4.28055328110228e-29	4.23457314886109	0.401	0.089	7.22557393850065e-25	CBCs	Scissor_pos_VS_Scissor_neg
KWMTBOMO03244	1.0012558086136e-21	4.22725759611091	0.32	0.072	1.69011980493975e-17	CBCs	Scissor_pos_VS_Scissor_neg
KWMTBOMO03163	5.34494862975429e-63	4.20579625393976	0.615	0.072	9.02227328702524e-59	CBCs	Scissor_pos_VS_Scissor_neg
KWMTBOMO01537	3.43993635531926e-55	4.15629689698772	0.842	0.762	5.80661256777891e-51	CBCs	Scissor_pos_VS_Scissor_neg
KWMTBOMO05607	1.42610360538859e-05	4.1408298331601	0.058	0.005	0.240726288589594	CBCs	Scissor_pos_VS_Scissor_neg
KWMTBOMO01521	0.0021145652843118	4.13065139351419	0.023	0	1	CBCs	Scissor_pos_VS_Scissor_neg
KWMTBOMO07892	0.0175619753015271	4.12958344108994	0.014	0	1	CBCs	Scissor_pos_VS_Scissor_neg
KWMTBOMO13850	1.26828723480441e-23	4.12917089537169	0.327	0.062	2.14086885234984e-19	CBCs	Scissor_pos_VS_Scissor_neg
KWMTBOMO14769	0.107662797035567	4.12313460954052	0.028	0.012	1	CBCs	Scissor_pos_VS_Scissor_neg
KWMTBOMO06937	0.154981206814689	4.12261872318112	0.019	0.007	1	CBCs	Scissor_pos_VS_Scissor_neg
KWMTBOMO12638	0.0412351733493382	4.10882501717878	0.016	0.002	1	CBCs	Scissor_pos_VS_Scissor_neg
KWMTBOMO09874	2.22569721770728e-12	4.1063921496424	0.162	0.022	3.75697690348988e-08	CBCs	Scissor_pos_VS_Scissor_neg
KWMTBOMO02417	0.00236641161048396	4.08959599374522	0.044	0.01	1	CBCs	Scissor_pos_VS_Scissor_neg
KWMTBOMO02330	0.0302854399528515	4.06557522238555	0.012	0	1	CBCs	Scissor_pos_VS_Scissor_neg
KWMTBOMO03158	5.22119999339024e-09	4.0561177759848	0.1	0.007	8.81338558884273e-05	CBCs	Scissor_pos_VS_Scissor_neg
KWMTBOMO16237	5.75409545011417e-16	4.04514287404432	0.278	0.077	9.71291311979272e-12	CBCs	Scissor_pos_VS_Scissor_neg
KWMTBOMO10529	0.0100308148068657	4.03578305094661	0.032	0.007	1	CBCs	Scissor_pos_VS_Scissor_neg
KWMTBOMO04140	4.14070476621879e-06	4.0250742049775	0.058	0.002	0.0698950964537731	CBCs	Scissor_pos_VS_Scissor_neg
KWMTBOMO14100	0.0698214809286295	3.99656919297621	0.014	0.002	1	CBCs	Scissor_pos_VS_Scissor_neg
KWMTBOMO15805	0.0701026724223592	3.97601468803508	0.014	0.002	1	CBCs	Scissor_pos_VS_Scissor_neg
KWMTBOMO08422	0.00183816362082275	3.9741641586339	0.03	0.002	1	CBCs	Scissor_pos_VS_Scissor_neg
KWMTBOMO03847	2.01347934871283e-05	3.9633173575319	0.072	0.012	0.339875314062726	CBCs	Scissor_pos_VS_Scissor_neg
KWMTBOMO03719	0.00307586758170832	3.94858611364092	0.028	0.002	1	CBCs	Scissor_pos_VS_Scissor_neg
KWMTBOMO03325	7.96960981066002e-06	3.93902639370306	0.077	0.012	0.134527013603941	CBCs	Scissor_pos_VS_Scissor_neg
KWMTBOMO15255	0.0412351733493382	3.92853412004735	0.016	0.002	1	CBCs	Scissor_pos_VS_Scissor_neg
KWMTBOMO05182	0.0175619753015271	3.91874055559489	0.014	0	1	CBCs	Scissor_pos_VS_Scissor_neg
KWMTBOMO04013	1.15142689235221e-06	3.90419469766127	0.123	0.035	0.0194360859429053	CBCs	Scissor_pos_VS_Scissor_neg
KWMTBOMO04698	0.00191199284759618	3.90407229896477	0.03	0.002	1	CBCs	Scissor_pos_VS_Scissor_neg
KWMTBOMO07405	0.042889139958132	3.86806475861419	0.021	0.005	1	CBCs	Scissor_pos_VS_Scissor_neg
KWMTBOMO14698	1.47222935222573e-23	3.84990278750278	0.404	0.136	2.48512314655703e-19	CBCs	Scissor_pos_VS_Scissor_neg
KWMTBOMO10104	0.00603855253925883	3.8412269834278	0.019	0	1	CBCs	Scissor_pos_VS_Scissor_neg
KWMTBOMO04836	1.72974686631506e-08	3.82677648517242	0.151	0.04	0.000291981271033982	CBCs	Scissor_pos_VS_Scissor_neg
KWMTBOMO14805	0.00145305341957285	3.82622012534784	0.042	0.007	1	CBCs	Scissor_pos_VS_Scissor_neg
KWMTBOMO15445	0.11870659584091	3.82406104009814	0.012	0.002	1	CBCs	Scissor_pos_VS_Scissor_neg
KWMTBOMO10919	0.0412351733493382	3.82163218057207	0.016	0.002	1	CBCs	Scissor_pos_VS_Scissor_neg
KWMTBOMO06289	0.12962228330198	3.80339215704696	0.023	0.01	1	CBCs	Scissor_pos_VS_Scissor_neg
KWMTBOMO10565	8.13516456192914e-08	3.80323034347277	0.116	0.022	0.00137321577805364	CBCs	Scissor_pos_VS_Scissor_neg
KWMTBOMO10012	0.000838087198910347	3.79610906185263	0.039	0.005	1	CBCs	Scissor_pos_VS_Scissor_neg
KWMTBOMO07409	7.5530907916624e-05	3.78677729069446	0.074	0.017	1	CBCs	Scissor_pos_VS_Scissor_neg
KWMTBOMO10015	0.181899047327933	3.76768140549794	0.014	0.005	1	CBCs	Scissor_pos_VS_Scissor_neg
KWMTBOMO03354	3.71076222007718e-11	3.75512391309729	0.151	0.022	6.26376662749028e-07	CBCs	Scissor_pos_VS_Scissor_neg
KWMTBOMO01204	1.98007317040584e-27	3.75030340617011	0.432	0.124	3.34236351164506e-23	CBCs	Scissor_pos_VS_Scissor_neg
KWMTBOMO14258	0.0302854399528515	3.73748389192113	0.012	0	1	CBCs	Scissor_pos_VS_Scissor_neg
KWMTBOMO10240	4.48769513527232e-07	3.7369851705878	0.074	0.005	0.00757522938833968	CBCs	Scissor_pos_VS_Scissor_neg
KWMTBOMO00828	0.194389028929614	3.71669923930632	0.021	0.01	1	CBCs	Scissor_pos_VS_Scissor_neg
KWMTBOMO12058	0.00221259881195232	3.7158392049317	0.035	0.005	1	CBCs	Scissor_pos_VS_Scissor_neg
KWMTBOMO10353	1.44252366833421e-07	3.70779028543013	0.095	0.012	0.00243497995214814	CBCs	Scissor_pos_VS_Scissor_neg
KWMTBOMO10356	6.72229856792852e-10	3.70295105318667	0.188	0.055	1.13472399826633e-05	CBCs	Scissor_pos_VS_Scissor_neg
KWMTBOMO11852	0.000352491266726378	3.6728149540642	0.086	0.03	1	CBCs	Scissor_pos_VS_Scissor_neg
KWMTBOMO08527	0.0302854399528515	3.65387729474496	0.012	0	1	CBCs	Scissor_pos_VS_Scissor_neg
KWMTBOMO02791	0.00606975816639174	3.62753468595147	0.03	0.005	1	CBCs	Scissor_pos_VS_Scissor_neg
KWMTBOMO00906	0.315517100553298	3.6261040010712	0.03	0.02	1	CBCs	Scissor_pos_VS_Scissor_neg
KWMTBOMO05888	7.17360523532873e-05	3.61625269424951	0.051	0.005	1	CBCs	Scissor_pos_VS_Scissor_neg
KWMTBOMO14102	0.11870659584091	3.60961494498555	0.012	0.002	1	CBCs	Scissor_pos_VS_Scissor_neg
KWMTBOMO02863	0.00188708584099344	3.60911039843932	0.03	0.002	1	CBCs	Scissor_pos_VS_Scissor_neg
KWMTBOMO05249	0.0249469307081533	3.59416532974524	0.019	0.002	1	CBCs	Scissor_pos_VS_Scissor_neg
KWMTBOMO05948	7.97017122723246e-08	3.58411337157653	0.158	0.05	0.00134536490315684	CBCs	Scissor_pos_VS_Scissor_neg
KWMTBOMO09507	0.0002145429239697	3.5807626015838	0.051	0.007	1	CBCs	Scissor_pos_VS_Scissor_neg
KWMTBOMO06502	1.13360396787634e-05	3.57813422911841	0.065	0.007	0.191352349777526	CBCs	Scissor_pos_VS_Scissor_neg
KWMTBOMO10018	0.0302854399528515	3.57761978842718	0.012	0	1	CBCs	Scissor_pos_VS_Scissor_neg
KWMTBOMO16422	0.0698214809286295	3.54438205646952	0.014	0.002	1	CBCs	Scissor_pos_VS_Scissor_neg
KWMTBOMO14490	0.182457374171397	3.53842764784439	0.014	0.005	1	CBCs	Scissor_pos_VS_Scissor_neg
KWMTBOMO13158	0.0145144146931957	3.53700054233712	0.021	0.002	1	CBCs	Scissor_pos_VS_Scissor_neg
KWMTBOMO13810	0.158797152951492	3.52712038712174	0.026	0.012	1	CBCs	Scissor_pos_VS_Scissor_neg
KWMTBOMO01099	0.0302854399528515	3.52540572361248	0.012	0	1	CBCs	Scissor_pos_VS_Scissor_neg
KWMTBOMO14264	0.00999678817474101	3.5247706572919	0.032	0.007	1	CBCs	Scissor_pos_VS_Scissor_neg
KWMTBOMO12376	0.00098573272773916	3.51894063365836	0.077	0.027	1	CBCs	Scissor_pos_VS_Scissor_neg
KWMTBOMO09512	0.00142444122787742	3.51446301001279	0.051	0.012	1	CBCs	Scissor_pos_VS_Scissor_neg
KWMTBOMO12164	0.000458612552616354	3.50572816708417	0.081	0.027	1	CBCs	Scissor_pos_VS_Scissor_neg
KWMTBOMO03904	8.05364941283067e-33	3.50092719441577	0.466	0.124	1.35945602088582e-28	CBCs	Scissor_pos_VS_Scissor_neg
KWMTBOMO15122	0.000938274434280418	3.50024159101799	0.044	0.007	1	CBCs	Scissor_pos_VS_Scissor_neg
KWMTBOMO07218	0.0104731795168563	3.49440587524582	0.049	0.017	1	CBCs	Scissor_pos_VS_Scissor_neg
KWMTBOMO09228	4.96881954772401e-11	3.48724690095073	0.179	0.04	8.38736739655813e-07	CBCs	Scissor_pos_VS_Scissor_neg
KWMTBOMO06268	0.927222435196993	3.48602673826359	0.014	0.015	1	CBCs	Scissor_pos_VS_Scissor_neg
KWMTBOMO13681	0.0697747317362809	3.47790911487624	0.019	0.005	1	CBCs	Scissor_pos_VS_Scissor_neg
KWMTBOMO08722	0.0102673972666825	3.46184023152159	0.016	0	1	CBCs	Scissor_pos_VS_Scissor_neg
KWMTBOMO15792	8.96051690847954e-06	3.4615238838133	0.121	0.04	0.151253525415135	CBCs	Scissor_pos_VS_Scissor_neg
KWMTBOMO06130	7.87258203564541e-06	3.45069234713015	0.072	0.01	0.132889184761695	CBCs	Scissor_pos_VS_Scissor_neg
KWMTBOMO06571	0.530659254588328	3.44157778673024	0.012	0.007	1	CBCs	Scissor_pos_VS_Scissor_neg
KWMTBOMO04642	0.0102673972666825	3.42893932116283	0.016	0	1	CBCs	Scissor_pos_VS_Scissor_neg
KWMTBOMO10020	0.358731606917525	3.41821669379775	0.014	0.007	1	CBCs	Scissor_pos_VS_Scissor_neg
KWMTBOMO03017	0.0159399411874706	3.40833946989857	0.03	0.007	1	CBCs	Scissor_pos_VS_Scissor_neg
KWMTBOMO02973	0.0102673972666825	3.39817522497708	0.016	0	1	CBCs	Scissor_pos_VS_Scissor_neg
KWMTBOMO09508	0.00187136072556678	3.39600753699141	0.058	0.017	1	CBCs	Scissor_pos_VS_Scissor_neg
KWMTBOMO01942	0.119171507293392	3.38013211655584	0.012	0.002	1	CBCs	Scissor_pos_VS_Scissor_neg
KWMTBOMO06606	5.16029229014153e-09	3.37590251132166	0.246	0.112	8.7105733857589e-05	CBCs	Scissor_pos_VS_Scissor_neg
KWMTBOMO04289	0.00603855253925883	3.34283395856323	0.019	0	1	CBCs	Scissor_pos_VS_Scissor_neg
KWMTBOMO00557	0.0364585221017701	3.3423280166504	0.03	0.01	1	CBCs	Scissor_pos_VS_Scissor_neg
KWMTBOMO01536	1.75628250107908e-17	3.34135242155159	0.262	0.055	2.96460486182148e-13	CBCs	Scissor_pos_VS_Scissor_neg
KWMTBOMO07692	0.00864036650257211	3.3410864244075	0.023	0.002	1	CBCs	Scissor_pos_VS_Scissor_neg
KWMTBOMO01620	0.0100920110006009	3.33851924457378	0.077	0.037	1	CBCs	Scissor_pos_VS_Scissor_neg
KWMTBOMO13529	0.000202956012520259	3.33732993716608	0.07	0.017	1	CBCs	Scissor_pos_VS_Scissor_neg
KWMTBOMO11854	5.26174080728064e-05	3.33154641238908	0.118	0.045	0.888181848268972	CBCs	Scissor_pos_VS_Scissor_neg
KWMTBOMO01330	1.69336281452284e-07	3.3308633232868	0.079	0.005	0.00285839643091455	CBCs	Scissor_pos_VS_Scissor_neg
KWMTBOMO16471	1.88520432617516e-10	3.32477426138093	0.211	0.067	3.18222490258366e-06	CBCs	Scissor_pos_VS_Scissor_neg
KWMTBOMO10217	1.18282366442531e-06	3.31832446953632	0.169	0.069	0.0199660634554993	CBCs	Scissor_pos_VS_Scissor_neg
KWMTBOMO09803	0.358731606917525	3.31637954133291	0.014	0.007	1	CBCs	Scissor_pos_VS_Scissor_neg
KWMTBOMO14024	3.29903202433867e-40	3.31381517559148	0.582	0.228	5.56876605708368e-36	CBCs	Scissor_pos_VS_Scissor_neg
KWMTBOMO16870	0.0175619753015271	3.30312387937997	0.014	0	1	CBCs	Scissor_pos_VS_Scissor_neg
KWMTBOMO09952	1.57347511038399e-56	3.29172769291465	0.733	0.345	2.65602598632817e-52	CBCs	Scissor_pos_VS_Scissor_neg
KWMTBOMO12370	0.0491073777470112	3.28782157959767	0.032	0.012	1	CBCs	Scissor_pos_VS_Scissor_neg
KWMTBOMO00843	0.287191128479641	3.28500350715997	0.079	0.065	1	CBCs	Scissor_pos_VS_Scissor_neg
KWMTBOMO11206	0.413319075649526	3.2790196055862	0.016	0.01	1	CBCs	Scissor_pos_VS_Scissor_neg
KWMTBOMO00940	0.0102673972666825	3.27600226134898	0.016	0	1	CBCs	Scissor_pos_VS_Scissor_neg
KWMTBOMO16333	1.18496018063577e-05	3.27504694674499	0.088	0.02	0.200021278491317	CBCs	Scissor_pos_VS_Scissor_neg
KWMTBOMO14259	0.00192036203821689	3.27467447472942	0.03	0.002	1	CBCs	Scissor_pos_VS_Scissor_neg
KWMTBOMO16210	0.921713739869754	3.27088989614653	0.021	0.022	1	CBCs	Scissor_pos_VS_Scissor_neg
KWMTBOMO01591	0.0181566852532313	3.27036580809411	0.042	0.015	1	CBCs	Scissor_pos_VS_Scissor_neg
KWMTBOMO14088	7.32420284807955e-06	3.26190104580099	0.09	0.02	0.123632544075583	CBCs	Scissor_pos_VS_Scissor_neg
KWMTBOMO03544	0.0433397292282939	3.26120454757107	0.021	0.005	1	CBCs	Scissor_pos_VS_Scissor_neg
KWMTBOMO10146	4.45535208687345e-06	3.26066761655361	0.074	0.01	0.0752063432264238	CBCs	Scissor_pos_VS_Scissor_neg
KWMTBOMO13799	0.023879723129627	3.25867773397396	0.051	0.022	1	CBCs	Scissor_pos_VS_Scissor_neg
KWMTBOMO13306	0.648119975181151	3.25657456700989	0.039	0.035	1	CBCs	Scissor_pos_VS_Scissor_neg
KWMTBOMO11014	0.0883116105632711	3.25192257690924	0.026	0.01	1	CBCs	Scissor_pos_VS_Scissor_neg
KWMTBOMO06410	0.530659254588328	3.24755989384025	0.012	0.007	1	CBCs	Scissor_pos_VS_Scissor_neg
KWMTBOMO13528	0.291891273950445	3.23529778811083	0.012	0.005	1	CBCs	Scissor_pos_VS_Scissor_neg
KWMTBOMO09283	0.0109737696261957	3.23199060611468	0.088	0.047	1	CBCs	Scissor_pos_VS_Scissor_neg
KWMTBOMO06539	0.647737562730228	3.22782652745846	0.007	0.01	1	CBCs	Scissor_pos_VS_Scissor_neg
KWMTBOMO03940	3.94581800836464e-08	3.22354046615796	0.116	0.02	0.000666054079811952	CBCs	Scissor_pos_VS_Scissor_neg
KWMTBOMO16709	2.53064032745879e-12	3.22270702633264	0.211	0.052	4.27172087275044e-08	CBCs	Scissor_pos_VS_Scissor_neg
KWMTBOMO11238	9.35670020678302e-49	3.21783802387544	0.666	0.29	1.57941099490497e-44	CBCs	Scissor_pos_VS_Scissor_neg
KWMTBOMO03899	6.8943498117645e-14	3.20519297306583	0.295	0.109	1.16376624822585e-09	CBCs	Scissor_pos_VS_Scissor_neg
KWMTBOMO16106	0.238840601918992	3.19512783509101	0.016	0.007	1	CBCs	Scissor_pos_VS_Scissor_neg
KWMTBOMO14843	0.00114960826117125	3.19255092380685	0.1	0.045	1	CBCs	Scissor_pos_VS_Scissor_neg
KWMTBOMO16481	1.75470393107314e-07	3.19147	0.155	0.05	0.00296194023565147	CBCs	Scissor_pos_VS_Scissor_neg
KWMTBOMO09996	0.000980147750298112	3.19130717925774	0.049	0.01	1	CBCs	Scissor_pos_VS_Scissor_neg
KWMTBOMO15451	0.181899047327933	3.17180823720662	0.014	0.005	1	CBCs	Scissor_pos_VS_Scissor_neg
KWMTBOMO04750	0.09959988319439	3.15164085366452	0.051	0.03	1	CBCs	Scissor_pos_VS_Scissor_neg
KWMTBOMO16307	0.0587727213181407	3.14764457313578	0.058	0.032	1	CBCs	Scissor_pos_VS_Scissor_neg
KWMTBOMO08914	0.0412351733493382	3.13649559577194	0.016	0.002	1	CBCs	Scissor_pos_VS_Scissor_neg
KWMTBOMO01661	0.0205085053368334	3.12340601618682	0.037	0.012	1	CBCs	Scissor_pos_VS_Scissor_neg
KWMTBOMO03071	2.60319323530932e-35	3.10603864100258	0.631	0.313	4.39419018120213e-31	CBCs	Scissor_pos_VS_Scissor_neg
KWMTBOMO06201	0.29139946272886	3.1005327209771	0.028	0.017	1	CBCs	Scissor_pos_VS_Scissor_neg
KWMTBOMO16206	0.018549572391598	3.09334335265479	0.042	0.015	1	CBCs	Scissor_pos_VS_Scissor_neg
KWMTBOMO12377	3.09773853744723e-07	3.08492879753287	0.19	0.079	0.00522898265121092	CBCs	Scissor_pos_VS_Scissor_neg
KWMTBOMO04189	5.21108846564872e-18	3.08147608607108	0.367	0.139	8.79631733001505e-14	CBCs	Scissor_pos_VS_Scissor_neg
KWMTBOMO12566	2.36120825361713e-06	3.07480540456649	0.234	0.132	0.0398571953210572	CBCs	Scissor_pos_VS_Scissor_neg
KWMTBOMO16358	0.290227605968481	3.07442329309089	0.012	0.005	1	CBCs	Scissor_pos_VS_Scissor_neg
KWMTBOMO13553	0.469081132075353	3.07044527898131	0.009	0.015	1	CBCs	Scissor_pos_VS_Scissor_neg
KWMTBOMO04495	0.0245345930501802	3.0703905746176	0.019	0.002	1	CBCs	Scissor_pos_VS_Scissor_neg
KWMTBOMO08544	0.62648382110884	3.06749485438026	0.016	0.012	1	CBCs	Scissor_pos_VS_Scissor_neg
KWMTBOMO13428	0.903827995340852	3.06151306026651	0.026	0.025	1	CBCs	Scissor_pos_VS_Scissor_neg
KWMTBOMO11211	0.0561707966562743	3.06049827538049	0.028	0.01	1	CBCs	Scissor_pos_VS_Scissor_neg
KWMTBOMO09268	0.0175619753015271	3.05326463054993	0.014	0	1	CBCs	Scissor_pos_VS_Scissor_neg
KWMTBOMO08240	0.157392916749703	3.0516196718916	0.067	0.047	1	CBCs	Scissor_pos_VS_Scissor_neg
KWMTBOMO14110	0.0706678434777487	3.03886423020525	0.014	0.002	1	CBCs	Scissor_pos_VS_Scissor_neg
KWMTBOMO16312	0.000134565394671212	3.03661595209297	0.121	0.05	1	CBCs	Scissor_pos_VS_Scissor_neg
KWMTBOMO13914	0.000699484709472509	3.03160989240795	0.079	0.027	1	CBCs	Scissor_pos_VS_Scissor_neg
KWMTBOMO16083	0.833970974892861	3.02207986712443	0.014	0.012	1	CBCs	Scissor_pos_VS_Scissor_neg
KWMTBOMO12421	0.0302854399528515	3.01666938502594	0.012	0	1	CBCs	Scissor_pos_VS_Scissor_neg
KWMTBOMO11425	0.042059171797245	3.00242656990065	0.044	0.02	1	CBCs	Scissor_pos_VS_Scissor_neg
KWMTBOMO12385	0.362949327840607	3.00195603666919	0.023	0.015	1	CBCs	Scissor_pos_VS_Scissor_neg
KWMTBOMO15735	1.63487025456847e-06	3.00074342370719	0.2	0.094	0.0275966098971158	CBCs	Scissor_pos_VS_Scissor_neg
KWMTBOMO08172	0.0703847925624142	2.99549708719076	0.014	0.002	1	CBCs	Scissor_pos_VS_Scissor_neg
KWMTBOMO15037	0.0302854399528515	2.99376033777166	0.012	0	1	CBCs	Scissor_pos_VS_Scissor_neg
KWMTBOMO05725	0.00226904750042426	2.99217935459167	0.065	0.022	1	CBCs	Scissor_pos_VS_Scissor_neg
KWMTBOMO14220	4.09972912727968e-12	2.98757884059711	0.237	0.072	6.9203427668481e-08	CBCs	Scissor_pos_VS_Scissor_neg
KWMTBOMO08825	0.625495771066965	2.98708716265645	0.016	0.012	1	CBCs	Scissor_pos_VS_Scissor_neg
KWMTBOMO15770	3.47976318313954e-07	2.97938524429157	0.195	0.082	0.00587384025313955	CBCs	Scissor_pos_VS_Scissor_neg
KWMTBOMO14606	0.00053207135368034	2.97494436185775	0.042	0.005	1	CBCs	Scissor_pos_VS_Scissor_neg
KWMTBOMO05876	0.00886462412214851	2.97479354253258	0.023	0.002	1	CBCs	Scissor_pos_VS_Scissor_neg
KWMTBOMO05599	0.000217448998283269	2.96356365047235	0.1	0.037	1	CBCs	Scissor_pos_VS_Scissor_neg
KWMTBOMO11699	0.62648382110884	2.96286952039817	0.016	0.012	1	CBCs	Scissor_pos_VS_Scissor_neg
KWMTBOMO10570	0.0703847925624142	2.95882518502966	0.014	0.002	1	CBCs	Scissor_pos_VS_Scissor_neg
KWMTBOMO02701	0.119637844491741	2.95228808723677	0.012	0.002	1	CBCs	Scissor_pos_VS_Scissor_neg
KWMTBOMO05582	0.000109498913278682	2.95094142096337	0.132	0.06	1	CBCs	Scissor_pos_VS_Scissor_neg
KWMTBOMO15342	2.4000910885192e-06	2.94904014961813	0.172	0.072	0.0405135375742041	CBCs	Scissor_pos_VS_Scissor_neg
KWMTBOMO05209	6.13063526880153e-13	2.94887902206287	0.329	0.151	1.0348512333737e-08	CBCs	Scissor_pos_VS_Scissor_neg
KWMTBOMO08384	0.528770984565897	2.94580286194783	0.023	0.017	1	CBCs	Scissor_pos_VS_Scissor_neg
KWMTBOMO00150	0.742173898112679	2.94359100583263	0.028	0.025	1	CBCs	Scissor_pos_VS_Scissor_neg
KWMTBOMO01867	0.000424096851531156	2.94095068863611	0.086	0.03	1	CBCs	Scissor_pos_VS_Scissor_neg
KWMTBOMO14159	0.362949327840607	2.93926220307629	0.023	0.015	1	CBCs	Scissor_pos_VS_Scissor_neg
KWMTBOMO01695	0.395852162902957	2.9358882825387	0.026	0.017	1	CBCs	Scissor_pos_VS_Scissor_neg
KWMTBOMO15168	0.0297955569731124	2.9353078974432	0.093	0.057	1	CBCs	Scissor_pos_VS_Scissor_neg
KWMTBOMO05551	0.0302854399528515	2.92833820477808	0.012	0	1	CBCs	Scissor_pos_VS_Scissor_neg
KWMTBOMO10358	9.29256734803311e-14	2.92516643740577	0.265	0.082	1.56858536834799e-09	CBCs	Scissor_pos_VS_Scissor_neg
KWMTBOMO05997	0.0264627300139987	2.9250380264379	0.023	0.005	1	CBCs	Scissor_pos_VS_Scissor_neg
KWMTBOMO02875	0.296307534933931	2.92439515835336	0.039	0.027	1	CBCs	Scissor_pos_VS_Scissor_neg
KWMTBOMO04704	0.0302854399528515	2.92423439374408	0.012	0	1	CBCs	Scissor_pos_VS_Scissor_neg
KWMTBOMO09305	0.10973478556216	2.92225151842291	0.028	0.012	1	CBCs	Scissor_pos_VS_Scissor_neg
KWMTBOMO13901	1.42653919252073e-09	2.91943943607705	0.248	0.107	2.40799815697499e-05	CBCs	Scissor_pos_VS_Scissor_neg
KWMTBOMO13409	0.0109944427961636	2.91658591942932	0.088	0.047	1	CBCs	Scissor_pos_VS_Scissor_neg
KWMTBOMO01227	0.570844854508654	2.9143388942267	0.049	0.042	1	CBCs	Scissor_pos_VS_Scissor_neg
KWMTBOMO11278	0.872927497397654	2.91143813836373	0.019	0.017	1	CBCs	Scissor_pos_VS_Scissor_neg
KWMTBOMO16406	0.753266920849894	2.91125017212264	0.026	0.03	1	CBCs	Scissor_pos_VS_Scissor_neg
KWMTBOMO11033	3.17455661931489e-21	2.90733390040837	0.427	0.169	5.35865157340354e-17	CBCs	Scissor_pos_VS_Scissor_neg
KWMTBOMO06271	0.0549461369369921	2.90709676180801	0.056	0.03	1	CBCs	Scissor_pos_VS_Scissor_neg
KWMTBOMO03909	0.00787047017913029	2.90614318191263	0.121	0.072	1	CBCs	Scissor_pos_VS_Scissor_neg
KWMTBOMO04695	0.00347516019112559	2.9046747245389	0.084	0.037	1	CBCs	Scissor_pos_VS_Scissor_neg
KWMTBOMO11174	3.36232698232471e-06	2.90349754735152	0.153	0.06	0.0567560794616412	CBCs	Scissor_pos_VS_Scissor_neg
KWMTBOMO14012	0.694303682619126	2.89851868967689	0.012	0.015	1	CBCs	Scissor_pos_VS_Scissor_neg
KWMTBOMO04167	0.617401253647532	2.89757441750394	0.032	0.027	1	CBCs	Scissor_pos_VS_Scissor_neg
KWMTBOMO00995	0.0262204573459837	2.89288578824665	0.028	0.007	1	CBCs	Scissor_pos_VS_Scissor_neg
KWMTBOMO06334	0.560525062559147	2.88531728342985	0.026	0.02	1	CBCs	Scissor_pos_VS_Scissor_neg
KWMTBOMO10115	0.625495771066965	2.87936654885545	0.016	0.012	1	CBCs	Scissor_pos_VS_Scissor_neg
KWMTBOMO13917	0.0275676837942292	2.87593299246861	0.039	0.015	1	CBCs	Scissor_pos_VS_Scissor_neg
KWMTBOMO07000	0.494292114094622	2.87383251908665	0.021	0.015	1	CBCs	Scissor_pos_VS_Scissor_neg
KWMTBOMO04516	0.0215164086323356	2.86948826425201	0.065	0.032	1	CBCs	Scissor_pos_VS_Scissor_neg
KWMTBOMO01565	0.11870659584091	2.86857965698407	0.012	0.002	1	CBCs	Scissor_pos_VS_Scissor_neg
KWMTBOMO04640	0.0436423388355589	2.8628490150032	0.021	0.005	1	CBCs	Scissor_pos_VS_Scissor_neg
KWMTBOMO14044	0.398292183574606	2.86006822158274	0.039	0.03	1	CBCs	Scissor_pos_VS_Scissor_neg
KWMTBOMO14138	1.11002643591891e-13	2.85841543870439	0.304	0.117	1.87372462383113e-09	CBCs	Scissor_pos_VS_Scissor_neg
KWMTBOMO13300	0.916580906981044	2.85542415783137	0.023	0.025	1	CBCs	Scissor_pos_VS_Scissor_neg
KWMTBOMO08512	0.12010561000211	2.8553725361918	0.012	0.002	1	CBCs	Scissor_pos_VS_Scissor_neg
KWMTBOMO09778	8.74320010316772e-05	2.84750532060877	0.253	0.176	1	CBCs	Scissor_pos_VS_Scissor_neg
KWMTBOMO11260	0.000432919155911562	2.83612359989283	0.093	0.035	1	CBCs	Scissor_pos_VS_Scissor_neg
KWMTBOMO04537	0.00429109008647903	2.83542067442274	0.065	0.025	1	CBCs	Scissor_pos_VS_Scissor_neg
KWMTBOMO06057	0.547397814803017	2.83004668121433	0.016	0.022	1	CBCs	Scissor_pos_VS_Scissor_neg
KWMTBOMO06116	0.378368223465145	2.82732004346562	0.037	0.027	1	CBCs	Scissor_pos_VS_Scissor_neg
KWMTBOMO10595	0.674841413060777	2.82419660546774	0.009	0.012	1	CBCs	Scissor_pos_VS_Scissor_neg
KWMTBOMO10193	0.237828121832916	2.82171339268629	0.044	0.03	1	CBCs	Scissor_pos_VS_Scissor_neg
KWMTBOMO10313	0.0698214809286295	2.81717400929806	0.014	0.002	1	CBCs	Scissor_pos_VS_Scissor_neg
KWMTBOMO05137	0.000123752083808756	2.81555419552663	0.114	0.045	1	CBCs	Scissor_pos_VS_Scissor_neg
KWMTBOMO08559	0.86997543685469	2.81367357363798	0.019	0.017	1	CBCs	Scissor_pos_VS_Scissor_neg
KWMTBOMO07271	0.0770923442905491	2.8132471849843	0.079	0.052	1	CBCs	Scissor_pos_VS_Scissor_neg
KWMTBOMO10205	0.00394551019626197	2.79883793399793	0.037	0.007	1	CBCs	Scissor_pos_VS_Scissor_neg
KWMTBOMO13470	0.290227605968481	2.79735203911441	0.012	0.005	1	CBCs	Scissor_pos_VS_Scissor_neg
KWMTBOMO14480	0.414983319600644	2.79644968325532	0.016	0.01	1	CBCs	Scissor_pos_VS_Scissor_neg
KWMTBOMO12055	0.00570816318945923	2.79534357847182	0.067	0.027	1	CBCs	Scissor_pos_VS_Scissor_neg
KWMTBOMO08918	0.00131337163843382	2.78852215126928	0.162	0.099	1	CBCs	Scissor_pos_VS_Scissor_neg
KWMTBOMO01522	0.00211885618073997	2.78754621014709	0.172	0.112	1	CBCs	Scissor_pos_VS_Scissor_neg
KWMTBOMO13000	0.0754841249646886	2.78404241120486	0.037	0.017	1	CBCs	Scissor_pos_VS_Scissor_neg
KWMTBOMO10140	0.000108825722389885	2.77886829412996	0.081	0.022	1	CBCs	Scissor_pos_VS_Scissor_neg
KWMTBOMO03939	3.86964193609623e-06	2.77706992456569	0.118	0.035	0.0653195558813044	CBCs	Scissor_pos_VS_Scissor_neg
KWMTBOMO01623	0.920806412476538	2.77427590658279	0.021	0.022	1	CBCs	Scissor_pos_VS_Scissor_neg
KWMTBOMO02841	0.11870659584091	2.77053218213893	0.012	0.002	1	CBCs	Scissor_pos_VS_Scissor_neg
KWMTBOMO03907	0.0406085437921783	2.76218829443411	0.026	0.007	1	CBCs	Scissor_pos_VS_Scissor_neg
KWMTBOMO05556	0.00392973884053032	2.75921797756883	0.058	0.02	1	CBCs	Scissor_pos_VS_Scissor_neg
KWMTBOMO09107	0.0709587346560349	2.75703584856203	0.019	0.005	1	CBCs	Scissor_pos_VS_Scissor_neg
KWMTBOMO07228	0.0742690079077768	2.7489542191683	0.03	0.012	1	CBCs	Scissor_pos_VS_Scissor_neg
KWMTBOMO03156	0.112116674161337	2.74823048628844	0.044	0.025	1	CBCs	Scissor_pos_VS_Scissor_neg
KWMTBOMO14365	0.831699287449214	2.74443085487772	0.014	0.012	1	CBCs	Scissor_pos_VS_Scissor_neg
KWMTBOMO10797	0.358731606917525	2.74342342970509	0.014	0.007	1	CBCs	Scissor_pos_VS_Scissor_neg
KWMTBOMO03714	1.14900975410381e-13	2.74017224990073	0.327	0.139	1.93952846492723e-09	CBCs	Scissor_pos_VS_Scissor_neg
KWMTBOMO01621	2.42286239587432e-18	2.73588542205503	0.439	0.223	4.08979172423585e-14	CBCs	Scissor_pos_VS_Scissor_neg
KWMTBOMO03894	0.0431357649862952	2.72356419963954	0.07	0.04	1	CBCs	Scissor_pos_VS_Scissor_neg
KWMTBOMO08668	0.929366296450814	2.72355609438596	0.037	0.037	1	CBCs	Scissor_pos_VS_Scissor_neg
KWMTBOMO04012	0.00116516490539797	2.71635502205289	0.1	0.045	1	CBCs	Scissor_pos_VS_Scissor_neg
KWMTBOMO06792	0.0287308139194038	2.71169981054608	0.039	0.015	1	CBCs	Scissor_pos_VS_Scissor_neg
KWMTBOMO16423	0.11870659584091	2.71093452578779	0.012	0.002	1	CBCs	Scissor_pos_VS_Scissor_neg
KWMTBOMO02688	0.0869219141706239	2.71006132019653	0.039	0.02	1	CBCs	Scissor_pos_VS_Scissor_neg
KWMTBOMO09877	0.935497062824192	2.70993964956431	0.009	0.01	1	CBCs	Scissor_pos_VS_Scissor_neg
KWMTBOMO01905	0.290227605968481	2.7020436623271	0.012	0.005	1	CBCs	Scissor_pos_VS_Scissor_neg
KWMTBOMO08674	8.35166729529687e-06	2.7018723340695	0.142	0.055	0.140976143944611	CBCs	Scissor_pos_VS_Scissor_neg
KWMTBOMO13361	0.647737562730228	2.70125849305143	0.007	0.01	1	CBCs	Scissor_pos_VS_Scissor_neg
KWMTBOMO04614	0.00113746913558381	2.70025664727362	0.065	0.02	1	CBCs	Scissor_pos_VS_Scissor_neg
KWMTBOMO16169	1.14751344703034e-06	2.69705638213745	0.237	0.129	0.0193700269858721	CBCs	Scissor_pos_VS_Scissor_neg
KWMTBOMO10597	0.153082626983718	2.69042051564146	0.032	0.017	1	CBCs	Scissor_pos_VS_Scissor_neg
KWMTBOMO11540	0.12010561000211	2.68879408728307	0.012	0.002	1	CBCs	Scissor_pos_VS_Scissor_neg
KWMTBOMO03094	0.156137177763027	2.68247114430058	0.065	0.045	1	CBCs	Scissor_pos_VS_Scissor_neg
KWMTBOMO01203	8.1012998965998e-10	2.68227447826219	0.248	0.102	1.36749942254605e-05	CBCs	Scissor_pos_VS_Scissor_neg
KWMTBOMO06199	7.4844899405025e-18	2.67704090894438	0.413	0.194	1.26338190195682e-13	CBCs	Scissor_pos_VS_Scissor_neg
KWMTBOMO01568	0.0266382156742392	2.67522719245141	0.104	0.067	1	CBCs	Scissor_pos_VS_Scissor_neg
KWMTBOMO04939	0.710773380629107	2.66812581899542	0.023	0.02	1	CBCs	Scissor_pos_VS_Scissor_neg
KWMTBOMO12630	0.925282547446166	2.66610018522654	0.037	0.04	1	CBCs	Scissor_pos_VS_Scissor_neg
KWMTBOMO14503	0.0183561649497895	2.66520382947245	0.088	0.05	1	CBCs	Scissor_pos_VS_Scissor_neg
KWMTBOMO12135	0.0759855186798698	2.66125047652172	0.037	0.017	1	CBCs	Scissor_pos_VS_Scissor_neg
KWMTBOMO02807	0.0017645858447038	2.66095491905644	0.088	0.037	1	CBCs	Scissor_pos_VS_Scissor_neg
KWMTBOMO10178	0.00429109008647903	2.65603931654593	0.065	0.025	1	CBCs	Scissor_pos_VS_Scissor_neg
KWMTBOMO10746	0.0950776046850907	2.65597656998383	0.06	0.037	1	CBCs	Scissor_pos_VS_Scissor_neg
KWMTBOMO01043	0.659838624086767	2.65458821039869	0.019	0.015	1	CBCs	Scissor_pos_VS_Scissor_neg
KWMTBOMO09224	0.237626091856573	2.65079496728936	0.016	0.007	1	CBCs	Scissor_pos_VS_Scissor_neg
KWMTBOMO04249	9.61242774993209e-05	2.64675851139943	0.239	0.156	1	CBCs	Scissor_pos_VS_Scissor_neg
KWMTBOMO13334	0.546080702135115	2.64292447336194	0.044	0.037	1	CBCs	Scissor_pos_VS_Scissor_neg
KWMTBOMO16093	7.95354409929564e-06	2.63815153287367	0.139	0.052	0.13425582439611	CBCs	Scissor_pos_VS_Scissor_neg
KWMTBOMO09533	0.122621334709237	2.62884833643963	0.067	0.045	1	CBCs	Scissor_pos_VS_Scissor_neg
KWMTBOMO15947	0.542262706352596	2.62872221727938	0.037	0.047	1	CBCs	Scissor_pos_VS_Scissor_neg
KWMTBOMO16305	0.114330397539471	2.62471218767981	0.097	0.072	1	CBCs	Scissor_pos_VS_Scissor_neg
KWMTBOMO08908	0.930696521706727	2.62135795578883	0.012	0.012	1	CBCs	Scissor_pos_VS_Scissor_neg
KWMTBOMO02451	0.0786841225596484	2.60832582607214	0.093	0.065	1	CBCs	Scissor_pos_VS_Scissor_neg
KWMTBOMO14702	0.000389239973501262	2.60806811106659	0.132	0.065	1	CBCs	Scissor_pos_VS_Scissor_neg
KWMTBOMO02643	0.930696521706727	2.60798757525213	0.012	0.012	1	CBCs	Scissor_pos_VS_Scissor_neg
KWMTBOMO12877	0.151081696944793	2.60702429609971	0.051	0.032	1	CBCs	Scissor_pos_VS_Scissor_neg
KWMTBOMO14882	0.471160998741763	2.59863085809667	0.032	0.025	1	CBCs	Scissor_pos_VS_Scissor_neg
KWMTBOMO05945	0.41415070305872	2.59714852582318	0.016	0.01	1	CBCs	Scissor_pos_VS_Scissor_neg
KWMTBOMO11236	0.500600410517792	2.59295952215749	0.012	0.017	1	CBCs	Scissor_pos_VS_Scissor_neg
KWMTBOMO06869	0.918362963196749	2.59096525429968	0.014	0.015	1	CBCs	Scissor_pos_VS_Scissor_neg
KWMTBOMO10594	0.585436801268653	2.59005354880666	0.014	0.01	1	CBCs	Scissor_pos_VS_Scissor_neg
KWMTBOMO08232	0.67977766446128	2.58548970549898	0.042	0.05	1	CBCs	Scissor_pos_VS_Scissor_neg
KWMTBOMO06683	0.183577838256153	2.58547970507268	0.014	0.005	1	CBCs	Scissor_pos_VS_Scissor_neg
KWMTBOMO10009	0.647737562730228	2.58463550459157	0.007	0.01	1	CBCs	Scissor_pos_VS_Scissor_neg
KWMTBOMO00073	0.000234773447311737	2.57628745451057	0.139	0.067	1	CBCs	Scissor_pos_VS_Scissor_neg
KWMTBOMO13797	0.0267205545959509	2.56986423779083	0.121	0.082	1	CBCs	Scissor_pos_VS_Scissor_neg
KWMTBOMO12971	0.029492807636898	2.56859536034721	0.07	0.037	1	CBCs	Scissor_pos_VS_Scissor_neg
KWMTBOMO10630	0.424687728491271	2.56769283371328	0.028	0.02	1	CBCs	Scissor_pos_VS_Scissor_neg
KWMTBOMO09630	0.745308731675943	2.55967717758757	0.028	0.025	1	CBCs	Scissor_pos_VS_Scissor_neg
KWMTBOMO08086	0.11337161480943	2.5537207748619	0.016	0.005	1	CBCs	Scissor_pos_VS_Scissor_neg
KWMTBOMO08747	1.6505627594519e-08	2.55100433969664	0.125	0.022	0.000278614993795482	CBCs	Scissor_pos_VS_Scissor_neg
KWMTBOMO14854	0.539707939182673	2.54830398194926	0.042	0.035	1	CBCs	Scissor_pos_VS_Scissor_neg
KWMTBOMO08841	0.381933149826651	2.54521862872474	0.037	0.027	1	CBCs	Scissor_pos_VS_Scissor_neg
KWMTBOMO09431	0.46255226622382	2.54413751071538	0.019	0.012	1	CBCs	Scissor_pos_VS_Scissor_neg
KWMTBOMO16268	0.175015966797042	2.53668179901406	0.072	0.052	1	CBCs	Scissor_pos_VS_Scissor_neg
KWMTBOMO12919	0.659838624086767	2.53537142397681	0.019	0.015	1	CBCs	Scissor_pos_VS_Scissor_neg
KWMTBOMO16482	0.290227605968481	2.53417202747837	0.012	0.005	1	CBCs	Scissor_pos_VS_Scissor_neg
KWMTBOMO09069	1.21286665553671e-06	2.52199039776564	0.211	0.102	0.0204731891454597	CBCs	Scissor_pos_VS_Scissor_neg
KWMTBOMO04756	0.0899780910978168	2.52180368675153	0.151	0.124	1	CBCs	Scissor_pos_VS_Scissor_neg
KWMTBOMO12386	0.793736225773863	2.5196754467942	0.037	0.042	1	CBCs	Scissor_pos_VS_Scissor_neg
KWMTBOMO13505	0.427211272946272	2.51849005911078	0.007	0.012	1	CBCs	Scissor_pos_VS_Scissor_neg
KWMTBOMO06299	0.00350488195926496	2.51666447490393	0.063	0.022	1	CBCs	Scissor_pos_VS_Scissor_neg
KWMTBOMO15708	0.570774670252337	2.51372277995877	0.042	0.052	1	CBCs	Scissor_pos_VS_Scissor_neg
KWMTBOMO08131	0.0144315884019245	2.51223507365273	0.039	0.012	1	CBCs	Scissor_pos_VS_Scissor_neg
KWMTBOMO00027	0.329742349353868	2.50826594290543	0.021	0.012	1	CBCs	Scissor_pos_VS_Scissor_neg
KWMTBOMO01793	0.0302854399528515	2.50798758676448	0.012	0	1	CBCs	Scissor_pos_VS_Scissor_neg
KWMTBOMO07341	0.808232670729402	2.50718685798684	0.012	0.01	1	CBCs	Scissor_pos_VS_Scissor_neg
KWMTBOMO14979	0.816220203620993	2.50410040911516	0.053	0.052	1	CBCs	Scissor_pos_VS_Scissor_neg
KWMTBOMO00792	0.000298583267633586	2.50286644540202	0.095	0.035	1	CBCs	Scissor_pos_VS_Scissor_neg
KWMTBOMO00428	0.803255625710975	2.50006803432188	0.012	0.01	1	CBCs	Scissor_pos_VS_Scissor_neg
KWMTBOMO11839	0.923899015989807	2.49674897016673	0.014	0.015	1	CBCs	Scissor_pos_VS_Scissor_neg
KWMTBOMO07189	0.0131439648613058	2.49595505602271	0.081	0.042	1	CBCs	Scissor_pos_VS_Scissor_neg
KWMTBOMO13577	0.469081132075353	2.49570281467712	0.009	0.015	1	CBCs	Scissor_pos_VS_Scissor_neg
KWMTBOMO06986	0.113005855979149	2.49517308284189	0.016	0.005	1	CBCs	Scissor_pos_VS_Scissor_neg
KWMTBOMO09472	6.46869830413833e-07	2.49454658066097	0.309	0.201	0.0109191627373855	CBCs	Scissor_pos_VS_Scissor_neg
KWMTBOMO11396	0.291058640597536	2.49410649495739	0.012	0.005	1	CBCs	Scissor_pos_VS_Scissor_neg
KWMTBOMO01243	0.668555573356125	2.4908445265086	0.046	0.042	1	CBCs	Scissor_pos_VS_Scissor_neg
KWMTBOMO02795	0.087613962862063	2.49006959630349	0.026	0.01	1	CBCs	Scissor_pos_VS_Scissor_neg
KWMTBOMO06027	0.0345339244680103	2.49002129094967	0.074	0.042	1	CBCs	Scissor_pos_VS_Scissor_neg
KWMTBOMO14443	0.711624751243805	2.47884970172068	0.023	0.02	1	CBCs	Scissor_pos_VS_Scissor_neg
KWMTBOMO13342	0.324282974049775	2.46773763611766	0.03	0.02	1	CBCs	Scissor_pos_VS_Scissor_neg
KWMTBOMO09933	0.00447418457048523	2.46482423946648	0.095	0.047	1	CBCs	Scissor_pos_VS_Scissor_neg
KWMTBOMO16025	0.297160964177917	2.46425189220429	0.039	0.027	1	CBCs	Scissor_pos_VS_Scissor_neg
KWMTBOMO11653	8.11482515380327e-06	2.46045610647536	0.155	0.065	0.136978248596199	CBCs	Scissor_pos_VS_Scissor_neg
KWMTBOMO05905	0.50062807811445	2.45579479592812	0.021	0.015	1	CBCs	Scissor_pos_VS_Scissor_neg
KWMTBOMO03985	0.893757268018829	2.45445317507017	0.023	0.022	1	CBCs	Scissor_pos_VS_Scissor_neg
KWMTBOMO13286	2.6435949333985e-12	2.45149018132491	0.311	0.132	4.46238824757668e-08	CBCs	Scissor_pos_VS_Scissor_neg
KWMTBOMO12710	0.674841413060777	2.45009904489388	0.009	0.012	1	CBCs	Scissor_pos_VS_Scissor_neg
KWMTBOMO00241	0.184139978011581	2.44785267076981	0.014	0.005	1	CBCs	Scissor_pos_VS_Scissor_neg
KWMTBOMO02745	9.65248440780412e-18	2.44647725326627	0.432	0.213	1.62933936803734e-13	CBCs	Scissor_pos_VS_Scissor_neg
KWMTBOMO12393	8.62832446119756e-18	2.44600141427418	0.476	0.263	1.45646116905015e-13	CBCs	Scissor_pos_VS_Scissor_neg
KWMTBOMO08412	0.00248101596402612	2.44376829194287	0.072	0.027	1	CBCs	Scissor_pos_VS_Scissor_neg
KWMTBOMO12667	4.14935655647447e-07	2.4421233669712	0.281	0.169	0.00700411386732891	CBCs	Scissor_pos_VS_Scissor_neg
KWMTBOMO07535	0.114105929747633	2.43963134758838	0.016	0.005	1	CBCs	Scissor_pos_VS_Scissor_neg
KWMTBOMO12115	0.0240600496840462	2.43957399689024	0.086	0.05	1	CBCs	Scissor_pos_VS_Scissor_neg
KWMTBOMO13846	0.504746788053897	2.43875747385348	0.03	0.04	1	CBCs	Scissor_pos_VS_Scissor_neg
KWMTBOMO09013	0.215953061013428	2.4324815811101	0.03	0.017	1	CBCs	Scissor_pos_VS_Scissor_neg
KWMTBOMO07893	0.854278096296384	2.43117229291899	0.016	0.015	1	CBCs	Scissor_pos_VS_Scissor_neg
KWMTBOMO13973	0.647737562730228	2.42745927219406	0.007	0.01	1	CBCs	Scissor_pos_VS_Scissor_neg
KWMTBOMO11906	0.0419170955721656	2.42452723508454	0.016	0.002	1	CBCs	Scissor_pos_VS_Scissor_neg
KWMTBOMO14959	0.916209050882962	2.42282178082696	0.035	0.037	1	CBCs	Scissor_pos_VS_Scissor_neg
KWMTBOMO03906	0.000449723283727032	2.41641610439427	0.093	0.035	1	CBCs	Scissor_pos_VS_Scissor_neg
KWMTBOMO06532	0.00336725868700013	2.41232881234794	0.158	0.102	1	CBCs	Scissor_pos_VS_Scissor_neg
KWMTBOMO06159	0.71990309101008	2.4021350975605	0.107	0.127	1	CBCs	Scissor_pos_VS_Scissor_neg
KWMTBOMO07068	0.930696521706727	2.40121502627469	0.012	0.012	1	CBCs	Scissor_pos_VS_Scissor_neg
KWMTBOMO14289	0.921750373116893	2.39489723241751	0.023	0.025	1	CBCs	Scissor_pos_VS_Scissor_neg
KWMTBOMO04536	5.21404203579008e-14	2.39436029558328	0.448	0.285	8.80130295641365e-10	CBCs	Scissor_pos_VS_Scissor_neg
KWMTBOMO05648	0.583659296061441	2.39141182031962	0.053	0.047	1	CBCs	Scissor_pos_VS_Scissor_neg
KWMTBOMO01986	0.113005855979149	2.38921275800336	0.016	0.005	1	CBCs	Scissor_pos_VS_Scissor_neg
KWMTBOMO12691	0.352562714584961	2.3869335593085	0.049	0.037	1	CBCs	Scissor_pos_VS_Scissor_neg
KWMTBOMO13702	0.19763463164962	2.38143403497497	0.021	0.01	1	CBCs	Scissor_pos_VS_Scissor_neg
KWMTBOMO14255	0.00192036203821689	2.38068432080706	0.03	0.002	1	CBCs	Scissor_pos_VS_Scissor_neg
KWMTBOMO05523	0.173037914822472	2.37849556876765	0.007	0.017	1	CBCs	Scissor_pos_VS_Scissor_neg
KWMTBOMO05753	0.195312326855978	2.3759275203265	0.021	0.01	1	CBCs	Scissor_pos_VS_Scissor_neg
KWMTBOMO03609	0.0498812822307614	2.37443680352541	0.032	0.012	1	CBCs	Scissor_pos_VS_Scissor_neg
KWMTBOMO14097	0.0995715123645854	2.37161997497521	0.06	0.037	1	CBCs	Scissor_pos_VS_Scissor_neg
KWMTBOMO11270	0.237626091856573	2.37059490362621	0.016	0.007	1	CBCs	Scissor_pos_VS_Scissor_neg
KWMTBOMO02659	0.243891406775064	2.36705173522196	0.072	0.055	1	CBCs	Scissor_pos_VS_Scissor_neg
KWMTBOMO15045	0.526062234423228	2.36571597774727	0.014	0.02	1	CBCs	Scissor_pos_VS_Scissor_neg
KWMTBOMO12116	0.450661140266351	2.36273187427838	0.03	0.022	1	CBCs	Scissor_pos_VS_Scissor_neg
KWMTBOMO12094	0.463369332428952	2.35968608537232	0.019	0.012	1	CBCs	Scissor_pos_VS_Scissor_neg
KWMTBOMO01608	0.360417404658314	2.35804836296943	0.014	0.007	1	CBCs	Scissor_pos_VS_Scissor_neg
KWMTBOMO04017	1.09148173066618e-05	2.3573207354656	0.241	0.141	0.184242116136452	CBCs	Scissor_pos_VS_Scissor_neg
KWMTBOMO03559	0.19322223916806	2.35604775840052	0.063	0.045	1	CBCs	Scissor_pos_VS_Scissor_neg
KWMTBOMO09428	0.399678286835376	2.35517139683858	0.026	0.017	1	CBCs	Scissor_pos_VS_Scissor_neg
KWMTBOMO12046	0.0012301118851112	2.3541828783892	0.125	0.065	1	CBCs	Scissor_pos_VS_Scissor_neg
KWMTBOMO13614	0.532895328121505	2.35354764889882	0.012	0.007	1	CBCs	Scissor_pos_VS_Scissor_neg
KWMTBOMO00498	4.55357711392613e-06	2.35191787392225	0.174	0.077	0.0768643816830731	CBCs	Scissor_pos_VS_Scissor_neg
KWMTBOMO05886	0.14119537102336	2.34973747839832	0.039	0.022	1	CBCs	Scissor_pos_VS_Scissor_neg
KWMTBOMO13993	0.768915997233323	2.34747545882938	0.032	0.03	1	CBCs	Scissor_pos_VS_Scissor_neg
KWMTBOMO14318	0.53244861589191	2.34652472386304	0.035	0.045	1	CBCs	Scissor_pos_VS_Scissor_neg
KWMTBOMO16670	0.729159333894324	2.34648147054034	0.026	0.022	1	CBCs	Scissor_pos_VS_Scissor_neg
KWMTBOMO16240	0.132244120418265	2.34586389333043	0.005	0.015	1	CBCs	Scissor_pos_VS_Scissor_neg
KWMTBOMO09779	0.0952234129213082	2.34142427628324	0.313	0.345	1	CBCs	Scissor_pos_VS_Scissor_neg
KWMTBOMO11178	0.758305375143092	2.33970251962404	0.028	0.032	1	CBCs	Scissor_pos_VS_Scissor_neg
KWMTBOMO09473	0.388608160234957	2.33863482169057	0.037	0.027	1	CBCs	Scissor_pos_VS_Scissor_neg
KWMTBOMO11063	0.21076326674723	2.33782335416845	0.039	0.025	1	CBCs	Scissor_pos_VS_Scissor_neg
KWMTBOMO08648	4.2272275791737e-05	2.33609859858307	0.316	0.241	0.71355601536452	CBCs	Scissor_pos_VS_Scissor_neg
KWMTBOMO11586	0.187061960920563	2.3346384787232	0.095	0.074	1	CBCs	Scissor_pos_VS_Scissor_neg
KWMTBOMO08233	0.113738305590644	2.33419748415548	0.016	0.005	1	CBCs	Scissor_pos_VS_Scissor_neg
KWMTBOMO14937	0.220213568417462	2.3219325444468	0.053	0.037	1	CBCs	Scissor_pos_VS_Scissor_neg
KWMTBOMO00459	0.156909937125328	2.32159262829756	0.002	0.01	1	CBCs	Scissor_pos_VS_Scissor_neg
KWMTBOMO10635	0.166613099995395	2.31986624349339	0.028	0.047	1	CBCs	Scissor_pos_VS_Scissor_neg
KWMTBOMO10120	0.0218720040170561	2.31932409489401	0.132	0.092	1	CBCs	Scissor_pos_VS_Scissor_neg
KWMTBOMO11727	0.426220035317418	2.31135977804027	0.007	0.012	1	CBCs	Scissor_pos_VS_Scissor_neg
KWMTBOMO10376	5.4143799011267e-18	2.31103474416508	0.51	0.333	9.13947327310186e-14	CBCs	Scissor_pos_VS_Scissor_neg
KWMTBOMO07794	0.0170513002125283	2.31038515742965	0.053	0.022	1	CBCs	Scissor_pos_VS_Scissor_neg
KWMTBOMO06194	0.933458878185995	2.31002782912556	0.032	0.032	1	CBCs	Scissor_pos_VS_Scissor_neg
KWMTBOMO10588	0.930696521706727	2.30822574116386	0.012	0.012	1	CBCs	Scissor_pos_VS_Scissor_neg
KWMTBOMO10184	0.805743164567022	2.30777210026047	0.012	0.01	1	CBCs	Scissor_pos_VS_Scissor_neg
KWMTBOMO04715	0.544289054155831	2.30746859764744	0.042	0.035	1	CBCs	Scissor_pos_VS_Scissor_neg
KWMTBOMO15240	0.862178225314862	2.30446281244771	0.065	0.072	1	CBCs	Scissor_pos_VS_Scissor_neg
KWMTBOMO02380	0.468144925106275	2.30293401935405	0.009	0.015	1	CBCs	Scissor_pos_VS_Scissor_neg
KWMTBOMO15781	0.769158769093608	2.29918980735591	0.123	0.129	1	CBCs	Scissor_pos_VS_Scissor_neg
KWMTBOMO02404	0.0678465489191855	2.29915967944009	0.06	0.035	1	CBCs	Scissor_pos_VS_Scissor_neg
KWMTBOMO09614	0.00059557566494947	2.29905271556158	0.06	0.015	1	CBCs	Scissor_pos_VS_Scissor_neg
KWMTBOMO16284	0.658902743437983	2.29786507838213	0.019	0.015	1	CBCs	Scissor_pos_VS_Scissor_neg
KWMTBOMO07090	0.193928582856436	2.29681319846564	0.021	0.01	1	CBCs	Scissor_pos_VS_Scissor_neg
KWMTBOMO04179	0.528770984565897	2.29183203429781	0.023	0.017	1	CBCs	Scissor_pos_VS_Scissor_neg
KWMTBOMO12913	0.0716770095124258	2.28863876431776	0.019	0.005	1	CBCs	Scissor_pos_VS_Scissor_neg
KWMTBOMO09110	0.628461932114919	2.28791210386624	0.016	0.012	1	CBCs	Scissor_pos_VS_Scissor_neg
KWMTBOMO03346	0.786583174054671	2.2849757804833	0.039	0.045	1	CBCs	Scissor_pos_VS_Scissor_neg
KWMTBOMO04778	0.477872150684348	2.27517385315877	0.044	0.057	1	CBCs	Scissor_pos_VS_Scissor_neg
KWMTBOMO15050	0.0339328869784543	2.26762717374703	0.081	0.047	1	CBCs	Scissor_pos_VS_Scissor_neg
KWMTBOMO08641	1.59295194967727e-07	2.2657731581269	0.183	0.069	0.00268890289105523	CBCs	Scissor_pos_VS_Scissor_neg
KWMTBOMO12171	0.498919329466202	2.26543950920215	0.049	0.062	1	CBCs	Scissor_pos_VS_Scissor_neg
KWMTBOMO00886	0.432593849717059	2.26519323553638	0.053	0.069	1	CBCs	Scissor_pos_VS_Scissor_neg
KWMTBOMO07192	0.000204519187084727	2.26018343736175	0.255	0.181	1	CBCs	Scissor_pos_VS_Scissor_neg
KWMTBOMO06982	0.182844719606229	2.25368173599917	0.125	0.107	1	CBCs	Scissor_pos_VS_Scissor_neg
KWMTBOMO08288	0.290227605968481	2.25259007094176	0.012	0.005	1	CBCs	Scissor_pos_VS_Scissor_neg
KWMTBOMO01175	0.00964078043508202	2.2504391044813	0.239	0.199	1	CBCs	Scissor_pos_VS_Scissor_neg
KWMTBOMO14785	0.463491701694363	2.24838734970301	0.023	0.032	1	CBCs	Scissor_pos_VS_Scissor_neg
KWMTBOMO03888	0.565042955941363	2.24704071358769	0.019	0.025	1	CBCs	Scissor_pos_VS_Scissor_neg
KWMTBOMO06607	0.037811604752786	2.23849746049829	0.086	0.052	1	CBCs	Scissor_pos_VS_Scissor_neg
KWMTBOMO15052	0.915087205815658	2.2377504643143	0.039	0.042	1	CBCs	Scissor_pos_VS_Scissor_neg
KWMTBOMO05787	0.388002812548653	2.23753858812246	0.044	0.06	1	CBCs	Scissor_pos_VS_Scissor_neg
KWMTBOMO12926	0.673940034271415	2.23623857638192	0.019	0.015	1	CBCs	Scissor_pos_VS_Scissor_neg
KWMTBOMO05968	0.296519044640839	2.22990717291629	0.028	0.017	1	CBCs	Scissor_pos_VS_Scissor_neg
KWMTBOMO06117	0.414686886964852	2.22874708985964	0.039	0.03	1	CBCs	Scissor_pos_VS_Scissor_neg
KWMTBOMO03118	0.491512086314066	2.22856940239728	0.035	0.027	1	CBCs	Scissor_pos_VS_Scissor_neg
KWMTBOMO10494	0.288477794849266	2.22817416561401	0.07	0.055	1	CBCs	Scissor_pos_VS_Scissor_neg
KWMTBOMO01880	0.752377474762217	2.22770345423667	0.028	0.025	1	CBCs	Scissor_pos_VS_Scissor_neg
KWMTBOMO15429	0.0706678434777487	2.2265539451389	0.014	0.002	1	CBCs	Scissor_pos_VS_Scissor_neg
KWMTBOMO00250	0.19810150735764	2.22510219637866	0.021	0.01	1	CBCs	Scissor_pos_VS_Scissor_neg
KWMTBOMO12305	0.712858240278793	2.22234431426687	0.095	0.094	1	CBCs	Scissor_pos_VS_Scissor_neg
KWMTBOMO14073	0.918297654479115	2.22108583110633	0.026	0.027	1	CBCs	Scissor_pos_VS_Scissor_neg
KWMTBOMO13217	0.748903296936298	2.22085860462489	0.023	0.027	1	CBCs	Scissor_pos_VS_Scissor_neg
KWMTBOMO00130	0.927222435196993	2.2148855896441	0.014	0.015	1	CBCs	Scissor_pos_VS_Scissor_neg
KWMTBOMO12764	0.0428503529516114	2.21395757610951	0.021	0.047	1	CBCs	Scissor_pos_VS_Scissor_neg
KWMTBOMO16054	0.0592069336162054	2.21250430802535	0.148	0.117	1	CBCs	Scissor_pos_VS_Scissor_neg
KWMTBOMO01824	0.531776695786839	2.20925766002609	0.012	0.007	1	CBCs	Scissor_pos_VS_Scissor_neg
KWMTBOMO10110	0.929483814424006	2.20849029503112	0.012	0.012	1	CBCs	Scissor_pos_VS_Scissor_neg
KWMTBOMO10176	0.00166586533013389	2.20445632452643	0.237	0.179	1	CBCs	Scissor_pos_VS_Scissor_neg
KWMTBOMO08435	0.0338949161423925	2.20302900760957	0.095	0.06	1	CBCs	Scissor_pos_VS_Scissor_neg
KWMTBOMO09346	0.573998105833434	2.20288864425229	0.128	0.127	1	CBCs	Scissor_pos_VS_Scissor_neg
KWMTBOMO12130	0.531776695786839	2.19731881851425	0.012	0.007	1	CBCs	Scissor_pos_VS_Scissor_neg
KWMTBOMO03900	1.23930227884728e-13	2.19555538039792	0.469	0.337	2.09194224669421e-09	CBCs	Scissor_pos_VS_Scissor_neg
KWMTBOMO15317	0.00984571378730217	2.19367706415509	0.165	0.117	1	CBCs	Scissor_pos_VS_Scissor_neg
KWMTBOMO09688	0.566055192359397	2.18486594984772	0.046	0.04	1	CBCs	Scissor_pos_VS_Scissor_neg
KWMTBOMO02822	0.722666834345612	2.18148916643217	0.019	0.022	1	CBCs	Scissor_pos_VS_Scissor_neg
KWMTBOMO05734	0.524122575136829	2.18093765197977	0.197	0.208	1	CBCs	Scissor_pos_VS_Scissor_neg
KWMTBOMO14699	0.596773191285583	2.18036795216136	0.056	0.05	1	CBCs	Scissor_pos_VS_Scissor_neg
KWMTBOMO04514	0.106083174709223	2.18019276579315	0.074	0.05	1	CBCs	Scissor_pos_VS_Scissor_neg
KWMTBOMO10592	0.350298608581722	2.1776688258282	0.046	0.035	1	CBCs	Scissor_pos_VS_Scissor_neg
KWMTBOMO08151	0.745691738984408	2.17690976830938	0.023	0.027	1	CBCs	Scissor_pos_VS_Scissor_neg
KWMTBOMO04653	0.291542097657178	2.17366869967584	0.016	0.027	1	CBCs	Scissor_pos_VS_Scissor_neg
KWMTBOMO14741	0.000156219061119483	2.17351670550095	0.109	0.042	1	CBCs	Scissor_pos_VS_Scissor_neg
KWMTBOMO14303	0.800169865936965	2.17275959727984	0.042	0.04	1	CBCs	Scissor_pos_VS_Scissor_neg
KWMTBOMO00148	0.102770214014477	2.17081285904539	0.021	0.007	1	CBCs	Scissor_pos_VS_Scissor_neg
KWMTBOMO05642	0.427211272946272	2.16963442159417	0.007	0.012	1	CBCs	Scissor_pos_VS_Scissor_neg
KWMTBOMO04786	0.681307793125639	2.16902105576333	0.044	0.04	1	CBCs	Scissor_pos_VS_Scissor_neg
KWMTBOMO00382	0.920733527351666	2.16841586880764	0.044	0.047	1	CBCs	Scissor_pos_VS_Scissor_neg
KWMTBOMO14472	0.0322704895194157	2.16675989053883	0.063	0.032	1	CBCs	Scissor_pos_VS_Scissor_neg
KWMTBOMO07478	0.924822380934858	2.16571854690218	0.016	0.017	1	CBCs	Scissor_pos_VS_Scissor_neg
KWMTBOMO10003	0.509970938735528	2.15586770177069	0.03	0.04	1	CBCs	Scissor_pos_VS_Scissor_neg
KWMTBOMO06711	0.0221381337683106	2.15400647374846	0.107	0.067	1	CBCs	Scissor_pos_VS_Scissor_neg
KWMTBOMO14163	0.141053510215869	2.15084501430501	0.158	0.136	1	CBCs	Scissor_pos_VS_Scissor_neg
KWMTBOMO06666	1.58935860704925e-80	2.15080696830324	0.93	0.747	2.68283732869913e-76	CBCs	Scissor_pos_VS_Scissor_neg
KWMTBOMO14326	0.210647658493458	2.1492721278262	0.026	0.042	1	CBCs	Scissor_pos_VS_Scissor_neg
KWMTBOMO03246	0.706066411551931	2.14628178243379	0.074	0.087	1	CBCs	Scissor_pos_VS_Scissor_neg
KWMTBOMO01418	0.0824907635967434	2.14504236616968	0.046	0.025	1	CBCs	Scissor_pos_VS_Scissor_neg
KWMTBOMO11474	0.684185175952074	2.14022005639767	0.021	0.017	1	CBCs	Scissor_pos_VS_Scissor_neg
KWMTBOMO12401	0.0070439692753786	2.13942807186734	0.232	0.184	1	CBCs	Scissor_pos_VS_Scissor_neg
KWMTBOMO07377	0.916432317391877	2.13863692807725	0.026	0.025	1	CBCs	Scissor_pos_VS_Scissor_neg
KWMTBOMO05252	0.132577891798408	2.13847637764894	0.058	0.037	1	CBCs	Scissor_pos_VS_Scissor_neg
KWMTBOMO01837	0.587536760979144	2.13687933726018	0.014	0.01	1	CBCs	Scissor_pos_VS_Scissor_neg
KWMTBOMO02747	0.933552337022077	2.13514216504715	0.037	0.037	1	CBCs	Scissor_pos_VS_Scissor_neg
KWMTBOMO04809	0.275107392690994	2.13455389420392	0.007	0.015	1	CBCs	Scissor_pos_VS_Scissor_neg
KWMTBOMO01592	0.204931556997184	2.12977151677439	0.016	0.03	1	CBCs	Scissor_pos_VS_Scissor_neg
KWMTBOMO10910	0.156909937125328	2.12893310415608	0.002	0.01	1	CBCs	Scissor_pos_VS_Scissor_neg
KWMTBOMO02808	0.0308995506354732	2.12837619578193	0.046	0.02	1	CBCs	Scissor_pos_VS_Scissor_neg
KWMTBOMO03122	0.140211719442839	2.1260557129377	0.049	0.077	1	CBCs	Scissor_pos_VS_Scissor_neg
KWMTBOMO05223	0.545787006805811	2.12564852932809	0.016	0.022	1	CBCs	Scissor_pos_VS_Scissor_neg
KWMTBOMO14262	0.919690094385369	2.12447501108303	0.016	0.017	1	CBCs	Scissor_pos_VS_Scissor_neg
KWMTBOMO03110	0.576914112044136	2.12314745388336	0.021	0.027	1	CBCs	Scissor_pos_VS_Scissor_neg
KWMTBOMO00199	0.831699287449214	2.12271935875934	0.014	0.012	1	CBCs	Scissor_pos_VS_Scissor_neg
KWMTBOMO07524	0.0714369255402773	2.12167166786476	0.019	0.005	1	CBCs	Scissor_pos_VS_Scissor_neg
KWMTBOMO12029	0.0768290178260356	2.12159269247109	0.063	0.037	1	CBCs	Scissor_pos_VS_Scissor_neg
KWMTBOMO01191	0.428203852402907	2.12032512240425	0.007	0.012	1	CBCs	Scissor_pos_VS_Scissor_neg
KWMTBOMO09218	0.181899047327933	2.11976562631567	0.014	0.005	1	CBCs	Scissor_pos_VS_Scissor_neg
KWMTBOMO13249	0.00669116096542894	2.1195357434339	0.019	0.055	1	CBCs	Scissor_pos_VS_Scissor_neg
KWMTBOMO02439	0.68395067677677	2.1186102282766	0.044	0.052	1	CBCs	Scissor_pos_VS_Scissor_neg
KWMTBOMO09832	0.0688900161825938	2.11445638738595	0.012	0.03	1	CBCs	Scissor_pos_VS_Scissor_neg
KWMTBOMO09743	0.53430146547801	2.11401325207855	0.039	0.032	1	CBCs	Scissor_pos_VS_Scissor_neg
KWMTBOMO06516	0.923795666349451	2.11245394863542	0.016	0.017	1	CBCs	Scissor_pos_VS_Scissor_neg
KWMTBOMO15074	0.000269178174489884	2.11071566297509	0.183	0.107	1	CBCs	Scissor_pos_VS_Scissor_neg
KWMTBOMO09589	0.156909937125328	2.1102235856749	0.002	0.01	1	CBCs	Scissor_pos_VS_Scissor_neg
KWMTBOMO01531	0.924847084406617	2.1094729413012	0.026	0.025	1	CBCs	Scissor_pos_VS_Scissor_neg
KWMTBOMO13930	0.371802880567051	2.10922865618593	0.005	0.01	1	CBCs	Scissor_pos_VS_Scissor_neg
KWMTBOMO14976	0.238232800507487	2.10651675029488	0.016	0.007	1	CBCs	Scissor_pos_VS_Scissor_neg
KWMTBOMO13658	0.291891273950445	2.10576484115108	0.012	0.005	1	CBCs	Scissor_pos_VS_Scissor_neg
KWMTBOMO14573	0.58648634542646	2.0986466387754	0.014	0.01	1	CBCs	Scissor_pos_VS_Scissor_neg
KWMTBOMO06121	0.854688719151016	2.09639876462962	0.067	0.074	1	CBCs	Scissor_pos_VS_Scissor_neg
KWMTBOMO04784	0.935497062824192	2.09335253176771	0.009	0.01	1	CBCs	Scissor_pos_VS_Scissor_neg
KWMTBOMO09155	0.107095246101661	2.09127841233102	0.007	0.02	1	CBCs	Scissor_pos_VS_Scissor_neg
KWMTBOMO00550	0.916545465305838	2.08684966864847	0.028	0.03	1	CBCs	Scissor_pos_VS_Scissor_neg
KWMTBOMO10144	0.00362808741209177	2.08602430078283	0.125	0.072	1	CBCs	Scissor_pos_VS_Scissor_neg
KWMTBOMO03790	0.101421512407505	2.0857450369064	0.072	0.047	1	CBCs	Scissor_pos_VS_Scissor_neg
KWMTBOMO05877	0.00955745447136067	2.0840826044969	0.176	0.127	1	CBCs	Scissor_pos_VS_Scissor_neg
KWMTBOMO15431	0.775966373406581	2.08386679278568	0.032	0.037	1	CBCs	Scissor_pos_VS_Scissor_neg
KWMTBOMO05866	0.119171507293392	2.0782609503583	0.012	0.002	1	CBCs	Scissor_pos_VS_Scissor_neg
KWMTBOMO09432	0.647737562730228	2.07669319453672	0.007	0.01	1	CBCs	Scissor_pos_VS_Scissor_neg
KWMTBOMO05418	0.454620629438336	2.07122422314298	0.042	0.055	1	CBCs	Scissor_pos_VS_Scissor_neg
KWMTBOMO06994	0.416651517718444	2.06946946551297	0.016	0.01	1	CBCs	Scissor_pos_VS_Scissor_neg
KWMTBOMO09805	0.803255625710975	2.06804967010559	0.012	0.01	1	CBCs	Scissor_pos_VS_Scissor_neg
KWMTBOMO12587	9.42124423587805e-07	2.06789317238228	0.35	0.256	0.0159030602701622	CBCs	Scissor_pos_VS_Scissor_neg
KWMTBOMO07428	1.25392767036321e-19	2.06721385451377	0.645	0.561	2.11662990757311e-15	CBCs	Scissor_pos_VS_Scissor_neg
KWMTBOMO02926	0.263664478570257	2.06578903555797	0.046	0.067	1	CBCs	Scissor_pos_VS_Scissor_neg
KWMTBOMO02103	0.125280919375505	2.06458202739699	0.014	0.03	1	CBCs	Scissor_pos_VS_Scissor_neg
KWMTBOMO03197	0.200865064858062	2.06389843925871	0.081	0.062	1	CBCs	Scissor_pos_VS_Scissor_neg
KWMTBOMO01998	0.41748709809997	2.06126636703626	0.016	0.01	1	CBCs	Scissor_pos_VS_Scissor_neg
KWMTBOMO00579	0.500600410517792	2.06067093775247	0.012	0.017	1	CBCs	Scissor_pos_VS_Scissor_neg
KWMTBOMO15659	0.936322952238048	2.0583060699022	0.056	0.057	1	CBCs	Scissor_pos_VS_Scissor_neg
KWMTBOMO16477	0.156950166003933	2.05806542847466	0.042	0.025	1	CBCs	Scissor_pos_VS_Scissor_neg
KWMTBOMO05064	0.00798951142790757	2.0579114895073	0.165	0.114	1	CBCs	Scissor_pos_VS_Scissor_neg
KWMTBOMO06611	1.87061451566776e-09	2.05783262309829	0.459	0.35	3.15759730244717e-05	CBCs	Scissor_pos_VS_Scissor_neg
KWMTBOMO11738	2.77512373445246e-08	2.05273677842864	0.401	0.293	0.000468440886375576	CBCs	Scissor_pos_VS_Scissor_neg
KWMTBOMO03763	4.12278086246018e-08	2.05238879365201	0.339	0.223	0.000695925409583278	CBCs	Scissor_pos_VS_Scissor_neg
KWMTBOMO09010	0.709380853146234	2.05097553161481	0.014	0.017	1	CBCs	Scissor_pos_VS_Scissor_neg
KWMTBOMO00950	0.484022726673193	2.05058376406074	0.028	0.037	1	CBCs	Scissor_pos_VS_Scissor_neg
KWMTBOMO07131	0.64216668390873	2.04910384526769	0.086	0.102	1	CBCs	Scissor_pos_VS_Scissor_neg
KWMTBOMO12195	0.134825284344961	2.04811534038696	0.109	0.084	1	CBCs	Scissor_pos_VS_Scissor_neg
KWMTBOMO13151	0.0746405074348012	2.04475495617241	0.03	0.012	1	CBCs	Scissor_pos_VS_Scissor_neg
KWMTBOMO00993	0.674841413060777	2.04370239594439	0.009	0.012	1	CBCs	Scissor_pos_VS_Scissor_neg
KWMTBOMO11112	0.407054577616575	2.04306834889683	0.088	0.077	1	CBCs	Scissor_pos_VS_Scissor_neg
KWMTBOMO03449	0.288318936058824	2.04064476579043	0.051	0.072	1	CBCs	Scissor_pos_VS_Scissor_neg
KWMTBOMO13579	0.366700107597815	2.03989241580402	0.035	0.025	1	CBCs	Scissor_pos_VS_Scissor_neg
KWMTBOMO07403	0.750906382464431	2.03787305780206	0.028	0.032	1	CBCs	Scissor_pos_VS_Scissor_neg
KWMTBOMO07904	0.0576328511047268	2.03747034125699	0.262	0.251	1	CBCs	Scissor_pos_VS_Scissor_neg
KWMTBOMO04741	0.758573918637013	2.03442350848088	0.09	0.104	1	CBCs	Scissor_pos_VS_Scissor_neg
KWMTBOMO05730	6.8705069888479e-05	2.03431795107444	0.237	0.151	1	CBCs	Scissor_pos_VS_Scissor_neg
KWMTBOMO10244	0.922529043598145	2.03176866146626	0.032	0.035	1	CBCs	Scissor_pos_VS_Scissor_neg
KWMTBOMO11714	0.468144925106275	2.03156495853514	0.009	0.015	1	CBCs	Scissor_pos_VS_Scissor_neg
KWMTBOMO04202	0.627121974245568	2.03146023344666	0.03	0.037	1	CBCs	Scissor_pos_VS_Scissor_neg
KWMTBOMO04884	0.0122739634254738	2.03005431854787	0.016	0.047	1	CBCs	Scissor_pos_VS_Scissor_neg
KWMTBOMO13472	0.130935627495239	2.02845419225899	0.023	0.01	1	CBCs	Scissor_pos_VS_Scissor_neg
KWMTBOMO06128	0.469445507059354	2.02772029394998	0.051	0.042	1	CBCs	Scissor_pos_VS_Scissor_neg
KWMTBOMO05483	0.0592244899310139	2.02402585338367	0.09	0.06	1	CBCs	Scissor_pos_VS_Scissor_neg
KWMTBOMO07556	0.132244120418265	2.02258273073737	0.005	0.015	1	CBCs	Scissor_pos_VS_Scissor_neg
KWMTBOMO13168	0.92003925266815	2.01928262453815	0.028	0.027	1	CBCs	Scissor_pos_VS_Scissor_neg
KWMTBOMO01819	0.330583236686395	2.01753452812775	0.021	0.032	1	CBCs	Scissor_pos_VS_Scissor_neg
KWMTBOMO12898	0.218997801060739	2.01585042766004	0.06	0.087	1	CBCs	Scissor_pos_VS_Scissor_neg
KWMTBOMO00235	0.691081145701122	2.0150909028727	0.012	0.015	1	CBCs	Scissor_pos_VS_Scissor_neg
KWMTBOMO09560	0.10908394219822	2.01220245722449	0.074	0.05	1	CBCs	Scissor_pos_VS_Scissor_neg
KWMTBOMO06706	0.0119997189143189	2.01032383409667	0.109	0.065	1	CBCs	Scissor_pos_VS_Scissor_neg
KWMTBOMO05980	0.011274003874787	2.00801566771329	0.179	0.132	1	CBCs	Scissor_pos_VS_Scissor_neg
KWMTBOMO06932	0.0647907476265304	2.00764706768865	0.142	0.109	1	CBCs	Scissor_pos_VS_Scissor_neg
KWMTBOMO01122	0.836122080970544	2.00753534200281	0.056	0.055	1	CBCs	Scissor_pos_VS_Scissor_neg
KWMTBOMO02904	0.0016363878363196	2.00733573249361	0.223	0.159	1	CBCs	Scissor_pos_VS_Scissor_neg
KWMTBOMO14695	0.105704438358857	2.00378706075807	0.056	0.089	1	CBCs	Scissor_pos_VS_Scissor_neg
KWMTBOMO05205	0.39140358901964	2.00101820269196	0.167	0.166	1	CBCs	Scissor_pos_VS_Scissor_neg
KWMTBOMO07243	0.920477574802451	2.00041136108796	0.037	0.04	1	CBCs	Scissor_pos_VS_Scissor_neg
KWMTBOMO09782	0.737330927753558	1.99983812417849	0.026	0.022	1	CBCs	Scissor_pos_VS_Scissor_neg
KWMTBOMO15012	0.921163825886659	1.99797389350411	0.037	0.04	1	CBCs	Scissor_pos_VS_Scissor_neg
KWMTBOMO08531	0.0452240018234361	1.99627543705412	0.005	0.02	1	CBCs	Scissor_pos_VS_Scissor_neg
KWMTBOMO12010	0.415724634349674	1.99457712415558	0.039	0.03	1	CBCs	Scissor_pos_VS_Scissor_neg
KWMTBOMO07762	0.0278674426288004	1.99438558416179	0.012	0.035	1	CBCs	Scissor_pos_VS_Scissor_neg
KWMTBOMO07958	0.549465808358595	1.99379408143267	0.042	0.035	1	CBCs	Scissor_pos_VS_Scissor_neg
KWMTBOMO16445	0.00442276733602023	1.99355299786313	0.274	0.228	1	CBCs	Scissor_pos_VS_Scissor_neg
KWMTBOMO12922	0.49971398153726	1.99158141423952	0.012	0.017	1	CBCs	Scissor_pos_VS_Scissor_neg
KWMTBOMO15377	0.895517737960689	1.9889852102545	0.023	0.022	1	CBCs	Scissor_pos_VS_Scissor_neg
KWMTBOMO04612	0.417187502375367	1.98813662780997	0.065	0.055	1	CBCs	Scissor_pos_VS_Scissor_neg
KWMTBOMO02416	0.934518803137026	1.98686245971048	0.053	0.057	1	CBCs	Scissor_pos_VS_Scissor_neg
KWMTBOMO08278	0.291058640597536	1.98447342710493	0.012	0.005	1	CBCs	Scissor_pos_VS_Scissor_neg
KWMTBOMO05387	0.833970974892861	1.98446119661495	0.014	0.012	1	CBCs	Scissor_pos_VS_Scissor_neg
KWMTBOMO11041	0.495224606425695	1.98401898649029	0.028	0.037	1	CBCs	Scissor_pos_VS_Scissor_neg
KWMTBOMO15231	0.223295002387661	1.98322604081999	0.005	0.012	1	CBCs	Scissor_pos_VS_Scissor_neg
KWMTBOMO01151	0.371802880567051	1.9826473738778	0.005	0.01	1	CBCs	Scissor_pos_VS_Scissor_neg
KWMTBOMO01318	0.440838940545269	1.98219657394785	0.144	0.144	1	CBCs	Scissor_pos_VS_Scissor_neg
KWMTBOMO15489	0.678315960298856	1.98198668252686	0.042	0.037	1	CBCs	Scissor_pos_VS_Scissor_neg
KWMTBOMO13448	0.700176436993289	1.98183166700878	0.053	0.05	1	CBCs	Scissor_pos_VS_Scissor_neg
KWMTBOMO03177	0.000295018666548284	1.98157700141061	0.232	0.156	1	CBCs	Scissor_pos_VS_Scissor_neg
KWMTBOMO15132	0.0885052613023594	1.98155126121711	0.028	0.052	1	CBCs	Scissor_pos_VS_Scissor_neg
KWMTBOMO14998	0.371802880567051	1.98099544211899	0.005	0.01	1	CBCs	Scissor_pos_VS_Scissor_neg
KWMTBOMO09128	0.913997482239724	1.97767037299219	0.023	0.025	1	CBCs	Scissor_pos_VS_Scissor_neg
KWMTBOMO15241	4.65750866494983e-28	1.97451620827577	0.845	0.71	7.86187462643531e-24	CBCs	Scissor_pos_VS_Scissor_neg
KWMTBOMO10169	0.028936245726768	1.97299118786032	0.128	0.089	1	CBCs	Scissor_pos_VS_Scissor_neg
KWMTBOMO06352	0.535136158265895	1.97206476373798	0.012	0.007	1	CBCs	Scissor_pos_VS_Scissor_neg
KWMTBOMO16432	0.458479013300684	1.97045503993978	0.019	0.012	1	CBCs	Scissor_pos_VS_Scissor_neg
KWMTBOMO14130	0.350788998577551	1.9704498288373	0.012	0.02	1	CBCs	Scissor_pos_VS_Scissor_neg
KWMTBOMO00795	0.755925721796901	1.97041028725202	0.088	0.102	1	CBCs	Scissor_pos_VS_Scissor_neg
KWMTBOMO15998	0.0086671448340308	1.97020416568974	0.188	0.136	1	CBCs	Scissor_pos_VS_Scissor_neg
KWMTBOMO16401	0.599981172959164	1.96292981654492	0.026	0.032	1	CBCs	Scissor_pos_VS_Scissor_neg
KWMTBOMO07119	0.875237148776593	1.96238454380738	0.162	0.189	1	CBCs	Scissor_pos_VS_Scissor_neg
KWMTBOMO09226	0.308628080554208	1.95870970552866	0.056	0.042	1	CBCs	Scissor_pos_VS_Scissor_neg
KWMTBOMO14284	0.62125127226368	1.9571378372937	0.03	0.037	1	CBCs	Scissor_pos_VS_Scissor_neg
KWMTBOMO03340	0.674841413060777	1.95711059218932	0.009	0.012	1	CBCs	Scissor_pos_VS_Scissor_neg
KWMTBOMO04413	0.179319753307607	1.95702424781335	0.021	0.037	1	CBCs	Scissor_pos_VS_Scissor_neg
KWMTBOMO05255	0.105101353505367	1.9569350622705	0.032	0.057	1	CBCs	Scissor_pos_VS_Scissor_neg
KWMTBOMO08277	0.887855221672173	1.95663984441092	0.021	0.02	1	CBCs	Scissor_pos_VS_Scissor_neg
KWMTBOMO09777	0.0336482272862035	1.95597903069787	0.153	0.114	1	CBCs	Scissor_pos_VS_Scissor_neg
KWMTBOMO00190	0.428203852402907	1.95408275891215	0.007	0.012	1	CBCs	Scissor_pos_VS_Scissor_neg
KWMTBOMO02538	3.48650446916659e-06	1.95348943003312	0.51	0.506	0.058852195439532	CBCs	Scissor_pos_VS_Scissor_neg
KWMTBOMO00424	0.000229322098698139	1.95305711776383	0.234	0.159	1	CBCs	Scissor_pos_VS_Scissor_neg
KWMTBOMO13769	0.506333436033348	1.95198168215584	0.049	0.062	1	CBCs	Scissor_pos_VS_Scissor_neg
KWMTBOMO07375	0.0521819419886971	1.95167361936506	0.179	0.146	1	CBCs	Scissor_pos_VS_Scissor_neg
KWMTBOMO10767	0.590693218740447	1.94967584177198	0.014	0.01	1	CBCs	Scissor_pos_VS_Scissor_neg
KWMTBOMO01983	0.768338600946637	1.94647127023066	0.032	0.037	1	CBCs	Scissor_pos_VS_Scissor_neg
KWMTBOMO15354	0.0476429839384447	1.9452844580129	0.002	0.015	1	CBCs	Scissor_pos_VS_Scissor_neg
KWMTBOMO09433	0.104556959448006	1.94289740274659	0.039	0.067	1	CBCs	Scissor_pos_VS_Scissor_neg
KWMTBOMO01179	0.595155321679322	1.94220894766587	0.026	0.032	1	CBCs	Scissor_pos_VS_Scissor_neg
KWMTBOMO12787	0.202980468591311	1.93684623503034	0.035	0.055	1	CBCs	Scissor_pos_VS_Scissor_neg
KWMTBOMO08807	0.267733755422625	1.93489829817644	0.014	0.025	1	CBCs	Scissor_pos_VS_Scissor_neg
KWMTBOMO00656	0.71894629491006	1.92694811395836	0.016	0.02	1	CBCs	Scissor_pos_VS_Scissor_neg
KWMTBOMO02903	0.748692091466071	1.92144548896126	0.111	0.114	1	CBCs	Scissor_pos_VS_Scissor_neg
KWMTBOMO08698	0.702716538312836	1.91900068554385	0.049	0.057	1	CBCs	Scissor_pos_VS_Scissor_neg
KWMTBOMO00540	0.0367210921715533	1.91846452737004	0.084	0.05	1	CBCs	Scissor_pos_VS_Scissor_neg
KWMTBOMO03179	0.182654538603306	1.91583711695991	0.014	0.027	1	CBCs	Scissor_pos_VS_Scissor_neg
KWMTBOMO14293	0.622553808152616	1.91292547907782	0.03	0.037	1	CBCs	Scissor_pos_VS_Scissor_neg
KWMTBOMO09623	0.0155123124302961	1.91284208452446	0.058	0.025	1	CBCs	Scissor_pos_VS_Scissor_neg
KWMTBOMO07248	0.761162106651925	1.91132419623898	0.03	0.035	1	CBCs	Scissor_pos_VS_Scissor_neg
KWMTBOMO12011	0.805743164567022	1.90777433394894	0.012	0.01	1	CBCs	Scissor_pos_VS_Scissor_neg
KWMTBOMO10281	0.687864196175712	1.90752257258908	0.012	0.015	1	CBCs	Scissor_pos_VS_Scissor_neg
KWMTBOMO07182	6.74105223881838e-16	1.90683710147956	0.555	0.382	1.13788961791254e-11	CBCs	Scissor_pos_VS_Scissor_neg
KWMTBOMO08299	0.614270820540477	1.90250014807819	0.028	0.035	1	CBCs	Scissor_pos_VS_Scissor_neg
KWMTBOMO14821	0.915586662124863	1.90199277729082	0.016	0.017	1	CBCs	Scissor_pos_VS_Scissor_neg
KWMTBOMO05606	0.182269002468835	1.90103422956864	0.014	0.027	1	CBCs	Scissor_pos_VS_Scissor_neg
KWMTBOMO06870	0.0859350994629836	1.89934843434265	0.009	0.025	1	CBCs	Scissor_pos_VS_Scissor_neg
KWMTBOMO05194	0.24690302765884	1.89902265789989	0.146	0.201	1	CBCs	Scissor_pos_VS_Scissor_neg
KWMTBOMO06568	0.244878234123548	1.89895794575649	0.044	0.03	1	CBCs	Scissor_pos_VS_Scissor_neg
KWMTBOMO10033	0.0408822111218328	1.89647055001663	0.1	0.065	1	CBCs	Scissor_pos_VS_Scissor_neg
KWMTBOMO04894	0.000837801321856612	1.89607955929633	0.295	0.238	1	CBCs	Scissor_pos_VS_Scissor_neg
KWMTBOMO09753	0.161719061625119	1.89221971666682	0.019	0.035	1	CBCs	Scissor_pos_VS_Scissor_neg
KWMTBOMO08716	0.532622688957483	1.89139535428732	0.023	0.017	1	CBCs	Scissor_pos_VS_Scissor_neg
KWMTBOMO05633	0.0774842111715409	1.88936603465378	0.019	0.04	1	CBCs	Scissor_pos_VS_Scissor_neg
KWMTBOMO12174	0.282083999752337	1.88805446928172	0.169	0.161	1	CBCs	Scissor_pos_VS_Scissor_neg
KWMTBOMO06175	0.756823780039682	1.88720560467732	0.028	0.032	1	CBCs	Scissor_pos_VS_Scissor_neg
KWMTBOMO10218	0.576605545607157	1.88699160692755	0.046	0.04	1	CBCs	Scissor_pos_VS_Scissor_neg
KWMTBOMO03393	0.151372874941373	1.88690599227112	0.081	0.06	1	CBCs	Scissor_pos_VS_Scissor_neg
KWMTBOMO01922	2.85879943171386e-09	1.88498724028613	0.439	0.333	4.825653440733e-05	CBCs	Scissor_pos_VS_Scissor_neg
KWMTBOMO09886	0.000174715689283219	1.88353511718143	0.251	0.171	1	CBCs	Scissor_pos_VS_Scissor_neg
KWMTBOMO04555	0.254341599588384	1.88342442595819	0.181	0.174	1	CBCs	Scissor_pos_VS_Scissor_neg
KWMTBOMO09528	0.66267454702099	1.88164411913711	0.039	0.047	1	CBCs	Scissor_pos_VS_Scissor_neg
KWMTBOMO14448	0.0116076359667223	1.87966922239988	0.118	0.072	1	CBCs	Scissor_pos_VS_Scissor_neg
KWMTBOMO04230	0.521853070831833	1.87925476342531	0.014	0.02	1	CBCs	Scissor_pos_VS_Scissor_neg
KWMTBOMO00779	0.720816087243799	1.87802084944996	0.016	0.02	1	CBCs	Scissor_pos_VS_Scissor_neg
KWMTBOMO16352	0.156909937125328	1.87775550429033	0.002	0.01	1	CBCs	Scissor_pos_VS_Scissor_neg
KWMTBOMO10138	0.42652825512754	1.87418745852153	0.042	0.032	1	CBCs	Scissor_pos_VS_Scissor_neg
KWMTBOMO09279	0.145072146620532	1.8736214778504	0.188	0.171	1	CBCs	Scissor_pos_VS_Scissor_neg
KWMTBOMO03678	0.425948244223543	1.87259676112709	0.028	0.02	1	CBCs	Scissor_pos_VS_Scissor_neg
KWMTBOMO04331	0.762493201599306	1.87161554407609	0.102	0.104	1	CBCs	Scissor_pos_VS_Scissor_neg
KWMTBOMO12969	0.132692925553425	1.86817715976115	0.03	0.015	1	CBCs	Scissor_pos_VS_Scissor_neg
KWMTBOMO13537	0.360354925352835	1.86520450268177	0.079	0.104	1	CBCs	Scissor_pos_VS_Scissor_neg
KWMTBOMO16032	0.507349480782362	1.86313037416656	0.209	0.223	1	CBCs	Scissor_pos_VS_Scissor_neg
KWMTBOMO11650	0.771833310321137	1.86236762611784	0.07	0.079	1	CBCs	Scissor_pos_VS_Scissor_neg
KWMTBOMO14167	0.156909937125328	1.86167102584208	0.002	0.01	1	CBCs	Scissor_pos_VS_Scissor_neg
KWMTBOMO02736	0.371802880567051	1.86109559567839	0.005	0.01	1	CBCs	Scissor_pos_VS_Scissor_neg
KWMTBOMO00188	0.691081145701122	1.86050358084933	0.012	0.015	1	CBCs	Scissor_pos_VS_Scissor_neg
KWMTBOMO14274	0.312834621656587	1.85788952579166	0.03	0.045	1	CBCs	Scissor_pos_VS_Scissor_neg
KWMTBOMO02244	0.737330927753558	1.85761092712973	0.026	0.022	1	CBCs	Scissor_pos_VS_Scissor_neg
KWMTBOMO01199	0.102183601409479	1.8554870003802	0.021	0.007	1	CBCs	Scissor_pos_VS_Scissor_neg
KWMTBOMO15610	0.744889536984933	1.85343626131765	0.023	0.027	1	CBCs	Scissor_pos_VS_Scissor_neg
KWMTBOMO04709	0.191358560580059	1.84946973398955	0.132	0.114	1	CBCs	Scissor_pos_VS_Scissor_neg
KWMTBOMO01228	0.289976616567672	1.84873185078645	0.016	0.027	1	CBCs	Scissor_pos_VS_Scissor_neg
KWMTBOMO14454	0.000174561632732787	1.84595666205866	0.42	0.395	1	CBCs	Scissor_pos_VS_Scissor_neg
KWMTBOMO12579	0.00500990338927591	1.84516862740429	0.186	0.129	1	CBCs	Scissor_pos_VS_Scissor_neg
KWMTBOMO15001	0.91103048824164	1.8434396249745	0.028	0.03	1	CBCs	Scissor_pos_VS_Scissor_neg
KWMTBOMO10326	0.0723205645695113	1.84323172784884	0.053	0.089	1	CBCs	Scissor_pos_VS_Scissor_neg
KWMTBOMO02308	0.13780855304562	1.84272811118215	0.09	0.067	1	CBCs	Scissor_pos_VS_Scissor_neg
KWMTBOMO03692	0.517933629850747	1.84245317416791	0.128	0.159	1	CBCs	Scissor_pos_VS_Scissor_neg
KWMTBOMO03935	0.00974307532389954	1.84146013871228	0.1	0.055	1	CBCs	Scissor_pos_VS_Scissor_neg
KWMTBOMO15365	9.60046525530067e-05	1.84049054838696	0.079	0.02	1	CBCs	Scissor_pos_VS_Scissor_neg
KWMTBOMO08337	0.0108323368248505	1.8383103429981	0.067	0.127	1	CBCs	Scissor_pos_VS_Scissor_neg
KWMTBOMO12779	0.110417382411511	1.83750233045059	0.042	0.069	1	CBCs	Scissor_pos_VS_Scissor_neg
KWMTBOMO06345	0.0462031565031651	1.83711715194324	0.044	0.02	1	CBCs	Scissor_pos_VS_Scissor_neg
KWMTBOMO07232	0.0570768797477197	1.83673795102249	0.056	0.094	1	CBCs	Scissor_pos_VS_Scissor_neg
KWMTBOMO07537	0.0776764866130681	1.83589676740325	0.037	0.017	1	CBCs	Scissor_pos_VS_Scissor_neg
KWMTBOMO04267	0.0444584348525345	1.83580304954279	0.06	0.032	1	CBCs	Scissor_pos_VS_Scissor_neg
KWMTBOMO09477	0.782136372509526	1.83518628944011	0.035	0.032	1	CBCs	Scissor_pos_VS_Scissor_neg
KWMTBOMO09404	0.591101173939913	1.83292429652101	0.023	0.03	1	CBCs	Scissor_pos_VS_Scissor_neg
KWMTBOMO12030	0.50062807811445	1.8311433786731	0.021	0.015	1	CBCs	Scissor_pos_VS_Scissor_neg
KWMTBOMO15999	0.406436310931076	1.82989432254248	0.132	0.124	1	CBCs	Scissor_pos_VS_Scissor_neg
KWMTBOMO16599	0.345279623786525	1.82981119970849	0.012	0.02	1	CBCs	Scissor_pos_VS_Scissor_neg
KWMTBOMO07565	0.607189648254642	1.82958734312514	0.03	0.025	1	CBCs	Scissor_pos_VS_Scissor_neg
KWMTBOMO11074	8.88033266043522e-12	1.82928092131888	0.536	0.464	1.49900015308147e-07	CBCs	Scissor_pos_VS_Scissor_neg
KWMTBOMO04858	0.678254131909076	1.8277053650205	0.044	0.052	1	CBCs	Scissor_pos_VS_Scissor_neg
KWMTBOMO08690	0.377006962451674	1.8267995215794	0.014	0.022	1	CBCs	Scissor_pos_VS_Scissor_neg
KWMTBOMO14033	0.374490859754661	1.82486370780396	0.06	0.079	1	CBCs	Scissor_pos_VS_Scissor_neg
KWMTBOMO05527	0.824446157614241	1.82393784654512	0.086	0.097	1	CBCs	Scissor_pos_VS_Scissor_neg
KWMTBOMO14536	0.436307330126225	1.82141132440372	0.067	0.087	1	CBCs	Scissor_pos_VS_Scissor_neg
KWMTBOMO04369	0.872193892075261	1.81542324440306	0.016	0.015	1	CBCs	Scissor_pos_VS_Scissor_neg
KWMTBOMO09438	0.291891273950445	1.81397298605559	0.012	0.005	1	CBCs	Scissor_pos_VS_Scissor_neg
KWMTBOMO10089	0.73176240400409	1.81235558221025	0.021	0.025	1	CBCs	Scissor_pos_VS_Scissor_neg
KWMTBOMO04184	0.0482267089427415	1.81010479043704	0.023	0.05	1	CBCs	Scissor_pos_VS_Scissor_neg
KWMTBOMO12299	0.715033821382939	1.80948343891363	0.023	0.02	1	CBCs	Scissor_pos_VS_Scissor_neg
KWMTBOMO13744	3.20478286432628e-08	1.80648155788866	0.381	0.268	0.000540967347498276	CBCs	Scissor_pos_VS_Scissor_neg
KWMTBOMO15840	0.0476429839384447	1.80618281673416	0.002	0.015	1	CBCs	Scissor_pos_VS_Scissor_neg
KWMTBOMO16298	0.757283770883416	1.80551566812367	0.032	0.037	1	CBCs	Scissor_pos_VS_Scissor_neg
KWMTBOMO04522	0.0835765015016953	1.80478480167545	0.123	0.181	1	CBCs	Scissor_pos_VS_Scissor_neg
KWMTBOMO15288	0.00472043831953767	1.80420753552583	0.053	0.017	1	CBCs	Scissor_pos_VS_Scissor_neg
KWMTBOMO08483	0.560416044678772	1.80350093793681	0.019	0.025	1	CBCs	Scissor_pos_VS_Scissor_neg
KWMTBOMO04803	0.727454102378193	1.80056583163823	0.135	0.139	1	CBCs	Scissor_pos_VS_Scissor_neg
KWMTBOMO03403	0.929730035509196	1.79842172815135	0.032	0.032	1	CBCs	Scissor_pos_VS_Scissor_neg
KWMTBOMO00159	0.395269370989144	1.79724814787464	0.086	0.074	1	CBCs	Scissor_pos_VS_Scissor_neg
KWMTBOMO02765	0.923565835330658	1.79589046280887	0.046	0.05	1	CBCs	Scissor_pos_VS_Scissor_neg
KWMTBOMO08941	0.223295002387661	1.79342706876308	0.005	0.012	1	CBCs	Scissor_pos_VS_Scissor_neg
KWMTBOMO02567	0.440981031421269	1.78931695105326	0.021	0.03	1	CBCs	Scissor_pos_VS_Scissor_neg
KWMTBOMO15803	0.645122814731926	1.78862525634821	0.007	0.01	1	CBCs	Scissor_pos_VS_Scissor_neg
KWMTBOMO11026	0.636002971640524	1.78828296110529	0.088	0.084	1	CBCs	Scissor_pos_VS_Scissor_neg
KWMTBOMO05150	0.599740791806542	1.78693948653181	0.051	0.045	1	CBCs	Scissor_pos_VS_Scissor_neg
KWMTBOMO15376	0.508188892128833	1.78636126234825	0.114	0.107	1	CBCs	Scissor_pos_VS_Scissor_neg
KWMTBOMO05206	0.0399044455707262	1.78547691752587	0.116	0.079	1	CBCs	Scissor_pos_VS_Scissor_neg
KWMTBOMO09556	0.564414319473605	1.78472488469876	0.065	0.079	1	CBCs	Scissor_pos_VS_Scissor_neg
KWMTBOMO16705	0.471863623688559	1.78356501143933	0.051	0.042	1	CBCs	Scissor_pos_VS_Scissor_neg
KWMTBOMO16216	3.36602237828645e-05	1.78301616565732	0.327	0.246	0.568184577454752	CBCs	Scissor_pos_VS_Scissor_neg
KWMTBOMO14534	0.0550536751925478	1.78295877397991	0.014	0.035	1	CBCs	Scissor_pos_VS_Scissor_neg
KWMTBOMO01868	0.0507625271414697	1.78262924353904	0.165	0.132	1	CBCs	Scissor_pos_VS_Scissor_neg
KWMTBOMO02599	7.34896119987168e-06	1.77905383487595	0.021	0.094	0.124050465053834	CBCs	Scissor_pos_VS_Scissor_neg
KWMTBOMO14662	0.915719666145499	1.77716187385472	0.023	0.025	1	CBCs	Scissor_pos_VS_Scissor_neg
KWMTBOMO06193	0.0900899289434827	1.77692551083979	0.021	0.042	1	CBCs	Scissor_pos_VS_Scissor_neg
KWMTBOMO03883	0.447108792831835	1.77689846185154	0.074	0.065	1	CBCs	Scissor_pos_VS_Scissor_neg
KWMTBOMO05435	0.75737392912546	1.77378531185944	0.035	0.04	1	CBCs	Scissor_pos_VS_Scissor_neg
KWMTBOMO13906	0.552028363916621	1.77321394759144	0.093	0.087	1	CBCs	Scissor_pos_VS_Scissor_neg
KWMTBOMO09019	0.416651517718444	1.77287045505719	0.016	0.01	1	CBCs	Scissor_pos_VS_Scissor_neg
KWMTBOMO11113	8.58035615973596e-05	1.76542866410884	0.316	0.243	1	CBCs	Scissor_pos_VS_Scissor_neg
KWMTBOMO12238	0.927058893849866	1.76387588362103	0.012	0.012	1	CBCs	Scissor_pos_VS_Scissor_neg
KWMTBOMO06805	0.274194899605542	1.76379313205318	0.197	0.194	1	CBCs	Scissor_pos_VS_Scissor_neg
KWMTBOMO08587	0.956525722174465	1.76361422050374	0.049	0.05	1	CBCs	Scissor_pos_VS_Scissor_neg
KWMTBOMO03212	0.0277068557853477	1.76344289191765	0.021	0.05	1	CBCs	Scissor_pos_VS_Scissor_neg
KWMTBOMO00902	0.759341143823294	1.76170602715186	0.097	0.112	1	CBCs	Scissor_pos_VS_Scissor_neg
KWMTBOMO10133	0.846065790411788	1.7581944598733	0.067	0.074	1	CBCs	Scissor_pos_VS_Scissor_neg
KWMTBOMO07657	0.58648634542646	1.7581534526788	0.014	0.01	1	CBCs	Scissor_pos_VS_Scissor_neg
KWMTBOMO13711	0.208701064459534	1.75795662824137	0.009	0.02	1	CBCs	Scissor_pos_VS_Scissor_neg
KWMTBOMO08031	0.633084815649501	1.75721	0.06	0.072	1	CBCs	Scissor_pos_VS_Scissor_neg
KWMTBOMO00985	0.338352293003032	1.75704747348256	0.097	0.129	1	CBCs	Scissor_pos_VS_Scissor_neg
KWMTBOMO00015	0.935497062824192	1.75682647669609	0.009	0.01	1	CBCs	Scissor_pos_VS_Scissor_neg
KWMTBOMO06998	0.133321198782906	1.75561420874151	0.03	0.052	1	CBCs	Scissor_pos_VS_Scissor_neg
KWMTBOMO12371	0.631434103846932	1.75501477793649	0.016	0.012	1	CBCs	Scissor_pos_VS_Scissor_neg
KWMTBOMO15363	0.291921009953391	1.75429937096441	0.07	0.055	1	CBCs	Scissor_pos_VS_Scissor_neg
KWMTBOMO16320	2.9725088358601e-27	1.75326198368802	0.668	0.449	5.01759491493184e-23	CBCs	Scissor_pos_VS_Scissor_neg
KWMTBOMO10359	0.041939765832384	1.75260742417011	0.146	0.109	1	CBCs	Scissor_pos_VS_Scissor_neg
KWMTBOMO07029	0.132244120418265	1.75015689560227	0.005	0.015	1	CBCs	Scissor_pos_VS_Scissor_neg
KWMTBOMO01946	0.7161447611128	1.75007624621476	0.016	0.02	1	CBCs	Scissor_pos_VS_Scissor_neg
KWMTBOMO02467	0.831699287449214	1.74874549498815	0.014	0.012	1	CBCs	Scissor_pos_VS_Scissor_neg
KWMTBOMO07215	0.599607512064949	1.74765071011766	0.118	0.114	1	CBCs	Scissor_pos_VS_Scissor_neg
KWMTBOMO00700	0.379034922936972	1.74587170911921	0.014	0.022	1	CBCs	Scissor_pos_VS_Scissor_neg
KWMTBOMO01694	0.000481186425235592	1.74428859927372	0.23	0.156	1	CBCs	Scissor_pos_VS_Scissor_neg
KWMTBOMO04774	0.532895328121505	1.74357659336732	0.012	0.007	1	CBCs	Scissor_pos_VS_Scissor_neg
KWMTBOMO03218	0.205203751651429	1.74215099232578	0.142	0.124	1	CBCs	Scissor_pos_VS_Scissor_neg
KWMTBOMO04799	0.0666620867260346	1.74204555021037	0.023	0.007	1	CBCs	Scissor_pos_VS_Scissor_neg
KWMTBOMO06989	0.0605996265705108	1.74032708485825	0.049	0.025	1	CBCs	Scissor_pos_VS_Scissor_neg
KWMTBOMO09451	0.14144352834316	1.73989319270759	0.148	0.127	1	CBCs	Scissor_pos_VS_Scissor_neg
KWMTBOMO06549	0.0823742090502659	1.73846173863042	0.035	0.062	1	CBCs	Scissor_pos_VS_Scissor_neg
KWMTBOMO00457	0.263058281945797	1.73658233960327	0.014	0.025	1	CBCs	Scissor_pos_VS_Scissor_neg
KWMTBOMO09671	0.70638945572069	1.73439573411123	0.014	0.017	1	CBCs	Scissor_pos_VS_Scissor_neg
KWMTBOMO13785	0.674841413060777	1.73045834006904	0.009	0.012	1	CBCs	Scissor_pos_VS_Scissor_neg
KWMTBOMO05086	4.93409227146321e-15	1.73011545023053	0.599	0.506	8.32874775422991e-11	CBCs	Scissor_pos_VS_Scissor_neg
KWMTBOMO01219	0.932787452936326	1.72875169804537	0.009	0.01	1	CBCs	Scissor_pos_VS_Scissor_neg
KWMTBOMO08828	0.70631066120022	1.72719043413788	0.058	0.067	1	CBCs	Scissor_pos_VS_Scissor_neg
KWMTBOMO08123	0.8044991477161	1.72476557685054	0.012	0.01	1	CBCs	Scissor_pos_VS_Scissor_neg
KWMTBOMO08889	0.0294955206325058	1.72382258433385	0.046	0.02	1	CBCs	Scissor_pos_VS_Scissor_neg
KWMTBOMO14417	0.0661974424489988	1.72344011000029	0.016	0.037	1	CBCs	Scissor_pos_VS_Scissor_neg
KWMTBOMO14023	0.508134989470714	1.7228396396417	0.032	0.042	1	CBCs	Scissor_pos_VS_Scissor_neg
KWMTBOMO14513	0.646429642873559	1.72281838828569	0.007	0.01	1	CBCs	Scissor_pos_VS_Scissor_neg
KWMTBOMO02868	0.414686886964852	1.72234901449698	0.039	0.03	1	CBCs	Scissor_pos_VS_Scissor_neg
KWMTBOMO12727	0.152102420617578	1.72219711439792	0.035	0.057	1	CBCs	Scissor_pos_VS_Scissor_neg
KWMTBOMO15427	0.432283484783618	1.72115375818928	0.028	0.02	1	CBCs	Scissor_pos_VS_Scissor_neg
KWMTBOMO16264	0.065739937380109	1.71952735627233	0.016	0.037	1	CBCs	Scissor_pos_VS_Scissor_neg
KWMTBOMO11092	0.531776695786839	1.71944827911457	0.012	0.007	1	CBCs	Scissor_pos_VS_Scissor_neg
KWMTBOMO02779	0.853226468671665	1.71929502833206	0.016	0.015	1	CBCs	Scissor_pos_VS_Scissor_neg
KWMTBOMO07018	0.0862605439727265	1.71773178690982	0.002	0.012	1	CBCs	Scissor_pos_VS_Scissor_neg
KWMTBOMO13925	0.0491658803933407	1.71577827617396	0.285	0.275	1	CBCs	Scissor_pos_VS_Scissor_neg
KWMTBOMO13044	0.721808413439593	1.71550059291637	0.063	0.072	1	CBCs	Scissor_pos_VS_Scissor_neg
KWMTBOMO16336	0.163136049836448	1.71425044481303	0.026	0.012	1	CBCs	Scissor_pos_VS_Scissor_neg
KWMTBOMO15622	0.83510733977303	1.71388248651966	0.014	0.012	1	CBCs	Scissor_pos_VS_Scissor_neg
KWMTBOMO02616	0.375739268510975	1.71313908241548	0.223	0.233	1	CBCs	Scissor_pos_VS_Scissor_neg
KWMTBOMO01525	0.241282746123739	1.71194121004634	0.016	0.007	1	CBCs	Scissor_pos_VS_Scissor_neg
KWMTBOMO15216	0.181589611936024	1.71145450443148	0.179	0.161	1	CBCs	Scissor_pos_VS_Scissor_neg
KWMTBOMO10286	0.532895328121505	1.7101125745849	0.012	0.007	1	CBCs	Scissor_pos_VS_Scissor_neg
KWMTBOMO06598	0.111982683101399	1.70939869838133	0.139	0.114	1	CBCs	Scissor_pos_VS_Scissor_neg
KWMTBOMO05735	2.18187859875262e-05	1.7089888129475	0.367	0.295	0.368301107469441	CBCs	Scissor_pos_VS_Scissor_neg
KWMTBOMO11428	0.258407444490996	1.70877514241362	0.046	0.032	1	CBCs	Scissor_pos_VS_Scissor_neg
KWMTBOMO04283	0.0271019454198685	1.70852999991029	0.128	0.087	1	CBCs	Scissor_pos_VS_Scissor_neg
KWMTBOMO06000	0.671321684415658	1.70834325023516	0.009	0.012	1	CBCs	Scissor_pos_VS_Scissor_neg
KWMTBOMO16067	0.370751590753872	1.70619300128625	0.005	0.01	1	CBCs	Scissor_pos_VS_Scissor_neg
KWMTBOMO04549	0.718356382985473	1.70131765823669	0.077	0.089	1	CBCs	Scissor_pos_VS_Scissor_neg
KWMTBOMO06656	0.424626022635513	1.70060769456918	0.035	0.047	1	CBCs	Scissor_pos_VS_Scissor_neg
KWMTBOMO05423	0.284800286832798	1.70043568164322	0.037	0.025	1	CBCs	Scissor_pos_VS_Scissor_neg
KWMTBOMO11806	0.373474960458443	1.69850688568692	0.111	0.144	1	CBCs	Scissor_pos_VS_Scissor_neg
KWMTBOMO00556	0.523687467951007	1.69812911701606	0.077	0.094	1	CBCs	Scissor_pos_VS_Scissor_neg
KWMTBOMO00139	0.397490376500022	1.69738169343359	0.016	0.025	1	CBCs	Scissor_pos_VS_Scissor_neg
KWMTBOMO12381	0.534015149611227	1.69293495315966	0.012	0.007	1	CBCs	Scissor_pos_VS_Scissor_neg
KWMTBOMO05310	0.693332908180518	1.68934911489659	0.046	0.055	1	CBCs	Scissor_pos_VS_Scissor_neg
KWMTBOMO07369	0.580120484158194	1.6891232784205	0.049	0.06	1	CBCs	Scissor_pos_VS_Scissor_neg
KWMTBOMO01988	0.000301846322626914	1.68905545340931	0.32	0.248	1	CBCs	Scissor_pos_VS_Scissor_neg
KWMTBOMO03521	0.139777170798585	1.68877665454587	0.023	0.042	1	CBCs	Scissor_pos_VS_Scissor_neg
KWMTBOMO15628	0.379712398611943	1.68852795157589	0.014	0.022	1	CBCs	Scissor_pos_VS_Scissor_neg
KWMTBOMO13339	0.855329982883439	1.68850426237342	0.016	0.015	1	CBCs	Scissor_pos_VS_Scissor_neg
KWMTBOMO14349	0.131724287970216	1.68803550059924	0.067	0.102	1	CBCs	Scissor_pos_VS_Scissor_neg
KWMTBOMO08845	5.60176813804329e-09	1.68799587307774	0.462	0.365	9.45578461701708e-05	CBCs	Scissor_pos_VS_Scissor_neg
KWMTBOMO10608	0.124551493400466	1.68772443638855	0.067	0.045	1	CBCs	Scissor_pos_VS_Scissor_neg
KWMTBOMO07872	0.472517030757511	1.68690513228397	0.049	0.04	1	CBCs	Scissor_pos_VS_Scissor_neg
KWMTBOMO07190	0.75870529832839	1.68687606550807	0.039	0.045	1	CBCs	Scissor_pos_VS_Scissor_neg
KWMTBOMO05299	0.479285705096524	1.68538925339726	0.044	0.057	1	CBCs	Scissor_pos_VS_Scissor_neg
KWMTBOMO14849	0.0396068145563786	1.68471836446049	0.007	0.025	1	CBCs	Scissor_pos_VS_Scissor_neg
KWMTBOMO07398	0.305007002326321	1.68298094878238	0.19	0.186	1	CBCs	Scissor_pos_VS_Scissor_neg
KWMTBOMO05449	0.174590203789666	1.68292437411134	0.181	0.166	1	CBCs	Scissor_pos_VS_Scissor_neg
KWMTBOMO12123	0.837381100336314	1.68237408152079	0.014	0.012	1	CBCs	Scissor_pos_VS_Scissor_neg
KWMTBOMO07648	0.0847319085578994	1.68200880995275	0.035	0.062	1	CBCs	Scissor_pos_VS_Scissor_neg
KWMTBOMO04497	0.994508546434157	1.6815645732667	0.135	0.149	1	CBCs	Scissor_pos_VS_Scissor_neg
KWMTBOMO04102	0.00202298872967742	1.68098591939729	0.032	0.084	1	CBCs	Scissor_pos_VS_Scissor_neg
KWMTBOMO15969	0.497400620821878	1.67672161230692	0.114	0.107	1	CBCs	Scissor_pos_VS_Scissor_neg
KWMTBOMO04325	0.966159621712096	1.6766641137803	0.151	0.169	1	CBCs	Scissor_pos_VS_Scissor_neg
KWMTBOMO09899	0.581136017882853	1.6758485314095	0.046	0.057	1	CBCs	Scissor_pos_VS_Scissor_neg
KWMTBOMO12761	0.291868518169201	1.67237862837384	0.028	0.042	1	CBCs	Scissor_pos_VS_Scissor_neg
KWMTBOMO15715	0.000450148131319759	1.67193324192113	0.336	0.28	1	CBCs	Scissor_pos_VS_Scissor_neg
KWMTBOMO09079	0.58910073894743	1.67049221900502	0.072	0.087	1	CBCs	Scissor_pos_VS_Scissor_neg
KWMTBOMO08013	0.033489533495696	1.66995515241694	0.188	0.149	1	CBCs	Scissor_pos_VS_Scissor_neg
KWMTBOMO05204	0.937589689951667	1.66992588462884	0.058	0.062	1	CBCs	Scissor_pos_VS_Scissor_neg
KWMTBOMO08916	0.836856002555362	1.66821722916927	0.072	0.079	1	CBCs	Scissor_pos_VS_Scissor_neg
KWMTBOMO04005	0.722153841257751	1.66650642876259	0.056	0.052	1	CBCs	Scissor_pos_VS_Scissor_neg
KWMTBOMO13705	0.692154706406916	1.66602663128342	0.012	0.015	1	CBCs	Scissor_pos_VS_Scissor_neg
KWMTBOMO05766	0.000672142436736993	1.6655378195658	0.244	0.171	1	CBCs	Scissor_pos_VS_Scissor_neg
KWMTBOMO00881	0.980891885548543	1.66542000871916	0.137	0.154	1	CBCs	Scissor_pos_VS_Scissor_neg
KWMTBOMO15986	0.880587500796999	1.66509022100186	0.084	0.092	1	CBCs	Scissor_pos_VS_Scissor_neg
KWMTBOMO08127	0.310735368476932	1.66265493792648	0.03	0.045	1	CBCs	Scissor_pos_VS_Scissor_neg
KWMTBOMO10531	0.656647229671607	1.65999380320267	0.037	0.045	1	CBCs	Scissor_pos_VS_Scissor_neg
KWMTBOMO08047	0.102300937984377	1.65909224492764	0.253	0.251	1	CBCs	Scissor_pos_VS_Scissor_neg
KWMTBOMO13965	0.208701064459534	1.65599273910682	0.009	0.02	1	CBCs	Scissor_pos_VS_Scissor_neg
KWMTBOMO04181	4.82019945015697e-08	1.65419725286301	0.485	0.429	0.000813649667186497	CBCs	Scissor_pos_VS_Scissor_neg
KWMTBOMO15320	0.761271224648324	1.6541287956371	0.028	0.032	1	CBCs	Scissor_pos_VS_Scissor_neg
KWMTBOMO09144	0.0596350824710568	1.65306271392053	0.049	0.084	1	CBCs	Scissor_pos_VS_Scissor_neg
KWMTBOMO09837	0.881794139835043	1.65297009401962	0.019	0.017	1	CBCs	Scissor_pos_VS_Scissor_neg
KWMTBOMO11489	0.454161078785211	1.65159292408512	0.046	0.037	1	CBCs	Scissor_pos_VS_Scissor_neg
KWMTBOMO12355	0.497059701854478	1.65144870456602	0.012	0.017	1	CBCs	Scissor_pos_VS_Scissor_neg
KWMTBOMO14886	0.211044969943375	1.65080368903682	0.049	0.072	1	CBCs	Scissor_pos_VS_Scissor_neg
KWMTBOMO10990	0.035720105277547	1.65055257931217	0.297	0.283	1	CBCs	Scissor_pos_VS_Scissor_neg
KWMTBOMO15910	0.0287370859002696	1.64828371654614	0.241	0.211	1	CBCs	Scissor_pos_VS_Scissor_neg
KWMTBOMO07452	0.316596385326886	1.64690893865922	0.009	0.017	1	CBCs	Scissor_pos_VS_Scissor_neg
KWMTBOMO06272	0.549691850222915	1.64563099061077	0.019	0.025	1	CBCs	Scissor_pos_VS_Scissor_neg
KWMTBOMO03392	0.292725506338421	1.64438196360526	0.012	0.005	1	CBCs	Scissor_pos_VS_Scissor_neg
KWMTBOMO13774	0.0553292657475167	1.64401822790613	0.014	0.035	1	CBCs	Scissor_pos_VS_Scissor_neg
KWMTBOMO09594	0.827978551432618	1.64190253357541	0.044	0.042	1	CBCs	Scissor_pos_VS_Scissor_neg
KWMTBOMO14883	0.853673334802905	1.6411968445667	0.067	0.074	1	CBCs	Scissor_pos_VS_Scissor_neg
KWMTBOMO09322	0.649381466808325	1.63907103575926	0.037	0.045	1	CBCs	Scissor_pos_VS_Scissor_neg
KWMTBOMO11717	0.00192902250479388	1.63859757272831	0.035	0.089	1	CBCs	Scissor_pos_VS_Scissor_neg
KWMTBOMO07379	0.351258922545718	1.63841572143844	0.023	0.035	1	CBCs	Scissor_pos_VS_Scissor_neg
KWMTBOMO04473	0.333512117381142	1.6360103634369	0.049	0.067	1	CBCs	Scissor_pos_VS_Scissor_neg
KWMTBOMO04011	0.674841413060777	1.63573102533499	0.009	0.012	1	CBCs	Scissor_pos_VS_Scissor_neg
KWMTBOMO08565	0.121824794222552	1.63566285060005	0.065	0.099	1	CBCs	Scissor_pos_VS_Scissor_neg
KWMTBOMO08529	0.0895474416668451	1.63537907193194	0.021	0.042	1	CBCs	Scissor_pos_VS_Scissor_neg
KWMTBOMO00567	0.240107994087129	1.63472095992042	0.07	0.052	1	CBCs	Scissor_pos_VS_Scissor_neg
KWMTBOMO16543	0.0895474416668451	1.63325641317396	0.021	0.042	1	CBCs	Scissor_pos_VS_Scissor_neg
KWMTBOMO04982	0.672494131224345	1.63316524235184	0.009	0.012	1	CBCs	Scissor_pos_VS_Scissor_neg
KWMTBOMO09538	0.335506831532702	1.63253740401514	0.058	0.045	1	CBCs	Scissor_pos_VS_Scissor_neg
KWMTBOMO06240	0.73176240400409	1.63076823831918	0.021	0.025	1	CBCs	Scissor_pos_VS_Scissor_neg
KWMTBOMO01150	0.152674668290663	1.6306073483462	0.026	0.045	1	CBCs	Scissor_pos_VS_Scissor_neg
KWMTBOMO04559	0.755343078150944	1.6287751828679	0.028	0.032	1	CBCs	Scissor_pos_VS_Scissor_neg
KWMTBOMO01385	0.144027956416507	1.62865645279601	0.016	0.032	1	CBCs	Scissor_pos_VS_Scissor_neg
KWMTBOMO15309	0.186704726638878	1.6271142820748	0.044	0.067	1	CBCs	Scissor_pos_VS_Scissor_neg
KWMTBOMO14848	0.424242336329635	1.62688300529058	0.019	0.027	1	CBCs	Scissor_pos_VS_Scissor_neg
KWMTBOMO09411	0.406279740006836	1.62608626285987	0.084	0.072	1	CBCs	Scissor_pos_VS_Scissor_neg
KWMTBOMO00325	0.0392184119000207	1.62600997314844	0.026	0.055	1	CBCs	Scissor_pos_VS_Scissor_neg
KWMTBOMO03147	0.167436123485431	1.6259324821392	0.213	0.203	1	CBCs	Scissor_pos_VS_Scissor_neg
KWMTBOMO14947	0.135162844563694	1.62591186092272	0.051	0.079	1	CBCs	Scissor_pos_VS_Scissor_neg
KWMTBOMO02770	0.0775895019219589	1.62576839710005	0.005	0.017	1	CBCs	Scissor_pos_VS_Scissor_neg
KWMTBOMO08890	0.332262276687249	1.62571313332389	0.035	0.05	1	CBCs	Scissor_pos_VS_Scissor_neg
KWMTBOMO02944	0.926295373891607	1.62454088107753	0.03	0.03	1	CBCs	Scissor_pos_VS_Scissor_neg
KWMTBOMO06750	0.467004257673989	1.62400178470207	0.086	0.077	1	CBCs	Scissor_pos_VS_Scissor_neg
KWMTBOMO14621	0.0721781884319803	1.62370147585649	0.03	0.057	1	CBCs	Scissor_pos_VS_Scissor_neg
KWMTBOMO05609	0.241359759911095	1.62361377116587	0.204	0.201	1	CBCs	Scissor_pos_VS_Scissor_neg
KWMTBOMO08888	0.937042113297268	1.62125483331808	0.037	0.037	1	CBCs	Scissor_pos_VS_Scissor_neg
KWMTBOMO03312	3.37539807398606e-27	1.62025368147624	0.865	0.777	5.69767194888846e-23	CBCs	Scissor_pos_VS_Scissor_neg
KWMTBOMO15192	0.407425737765265	1.6194137346033	0.049	0.065	1	CBCs	Scissor_pos_VS_Scissor_neg
KWMTBOMO03450	0.543780749131531	1.61836171094922	0.169	0.174	1	CBCs	Scissor_pos_VS_Scissor_neg
KWMTBOMO10444	0.912620097806843	1.61533065604598	0.084	0.092	1	CBCs	Scissor_pos_VS_Scissor_neg
KWMTBOMO04972	0.902779609362882	1.61372907935849	0.035	0.037	1	CBCs	Scissor_pos_VS_Scissor_neg
KWMTBOMO12861	0.732373328201543	1.61310581662007	0.019	0.022	1	CBCs	Scissor_pos_VS_Scissor_neg
KWMTBOMO04880	0.00164826573496017	1.61179932446472	0.329	0.293	1	CBCs	Scissor_pos_VS_Scissor_neg
KWMTBOMO14888	0.116758248074982	1.61108435934873	0.065	0.042	1	CBCs	Scissor_pos_VS_Scissor_neg
KWMTBOMO11648	0.100414319299669	1.60913592232912	0.056	0.089	1	CBCs	Scissor_pos_VS_Scissor_neg
KWMTBOMO11956	0.761938338119362	1.60822417704566	0.03	0.027	1	CBCs	Scissor_pos_VS_Scissor_neg
KWMTBOMO11388	0.477964337767036	1.60764748834156	0.121	0.114	1	CBCs	Scissor_pos_VS_Scissor_neg
KWMTBOMO16433	0.258290252895566	1.60701146737454	0.06	0.084	1	CBCs	Scissor_pos_VS_Scissor_neg
KWMTBOMO05175	0.964463162967146	1.60644540802419	0.123	0.134	1	CBCs	Scissor_pos_VS_Scissor_neg
KWMTBOMO08226	0.545301085048678	1.60598495109409	0.111	0.107	1	CBCs	Scissor_pos_VS_Scissor_neg
KWMTBOMO02469	0.224103007439188	1.60595991901756	0.019	0.032	1	CBCs	Scissor_pos_VS_Scissor_neg
KWMTBOMO07638	0.920883220239867	1.60558116788031	0.137	0.149	1	CBCs	Scissor_pos_VS_Scissor_neg
KWMTBOMO10641	0.378358191527159	1.60556330969043	0.014	0.022	1	CBCs	Scissor_pos_VS_Scissor_neg
KWMTBOMO07570	0.456278997516036	1.60527202522868	0.03	0.022	1	CBCs	Scissor_pos_VS_Scissor_neg
KWMTBOMO15099	0.3507459306851	1.60464960178411	0.023	0.035	1	CBCs	Scissor_pos_VS_Scissor_neg
KWMTBOMO14617	0.0440620915269119	1.60313868941461	0.012	0.032	1	CBCs	Scissor_pos_VS_Scissor_neg
KWMTBOMO07775	0.371802880567051	1.60307129312841	0.005	0.01	1	CBCs	Scissor_pos_VS_Scissor_neg
KWMTBOMO07390	0.643156244035795	1.60271241554474	0.035	0.042	1	CBCs	Scissor_pos_VS_Scissor_neg
KWMTBOMO08371	0.922948854942279	1.60206644290921	0.046	0.05	1	CBCs	Scissor_pos_VS_Scissor_neg
KWMTBOMO11732	0.411172409359603	1.60190460560002	0.193	0.196	1	CBCs	Scissor_pos_VS_Scissor_neg
KWMTBOMO11392	0.0652850418213732	1.60027076778988	0.016	0.037	1	CBCs	Scissor_pos_VS_Scissor_neg
KWMTBOMO10147	0.000332273562699106	1.59956082720489	0.39	0.362	1	CBCs	Scissor_pos_VS_Scissor_neg
KWMTBOMO08502	0.023135925211454	1.59919443203998	0.046	0.089	1	CBCs	Scissor_pos_VS_Scissor_neg
KWMTBOMO00113	0.804921069453283	1.59857807509067	0.088	0.089	1	CBCs	Scissor_pos_VS_Scissor_neg
KWMTBOMO06234	0.836244049022485	1.59724053536051	0.014	0.012	1	CBCs	Scissor_pos_VS_Scissor_neg
KWMTBOMO16222	0.444345512444994	1.59524784426823	0.104	0.132	1	CBCs	Scissor_pos_VS_Scissor_neg
KWMTBOMO01708	0.0008690112917291	1.59503867727474	0.044	0.109	1	CBCs	Scissor_pos_VS_Scissor_neg
KWMTBOMO07501	0.243992281922337	1.59468178822069	0.021	0.035	1	CBCs	Scissor_pos_VS_Scissor_neg
KWMTBOMO11322	0.83510733977303	1.5945929975553	0.014	0.012	1	CBCs	Scissor_pos_VS_Scissor_neg
KWMTBOMO11521	0.94241390481695	1.59269760339223	0.032	0.032	1	CBCs	Scissor_pos_VS_Scissor_neg
KWMTBOMO14092	0.771433319849251	1.59163006000819	0.035	0.04	1	CBCs	Scissor_pos_VS_Scissor_neg
KWMTBOMO09491	0.923899015989807	1.58920345812444	0.014	0.015	1	CBCs	Scissor_pos_VS_Scissor_neg
KWMTBOMO06578	0.565224721140416	1.58776368587373	0.044	0.037	1	CBCs	Scissor_pos_VS_Scissor_neg
KWMTBOMO05047	0.0427677487309107	1.58761338096404	0.077	0.045	1	CBCs	Scissor_pos_VS_Scissor_neg
KWMTBOMO01003	0.00996848621403928	1.58693	0.032	0.074	1	CBCs	Scissor_pos_VS_Scissor_neg
KWMTBOMO00016	0.107095246101661	1.58640722745248	0.007	0.02	1	CBCs	Scissor_pos_VS_Scissor_neg
KWMTBOMO12692	0.274401043906844	1.58561942995181	0.007	0.015	1	CBCs	Scissor_pos_VS_Scissor_neg
KWMTBOMO15075	0.206779226150162	1.58463148664141	0.114	0.156	1	CBCs	Scissor_pos_VS_Scissor_neg
KWMTBOMO09077	0.0494906315325288	1.58072114904095	0.037	0.069	1	CBCs	Scissor_pos_VS_Scissor_neg
KWMTBOMO08273	0.391194272520989	1.57980193873843	0.037	0.027	1	CBCs	Scissor_pos_VS_Scissor_neg
KWMTBOMO09430	0.237423351349521	1.57908598891769	0.012	0.022	1	CBCs	Scissor_pos_VS_Scissor_neg
KWMTBOMO09612	0.290227605968481	1.57800961530772	0.012	0.005	1	CBCs	Scissor_pos_VS_Scissor_neg
KWMTBOMO14051	0.0528719542909809	1.57796590928381	0.155	0.122	1	CBCs	Scissor_pos_VS_Scissor_neg
KWMTBOMO08027	0.711301981237348	1.5774597103836	0.044	0.04	1	CBCs	Scissor_pos_VS_Scissor_neg
KWMTBOMO13587	0.521013321361607	1.57720009790544	0.014	0.02	1	CBCs	Scissor_pos_VS_Scissor_neg
KWMTBOMO10537	0.400776062021982	1.57641069640512	0.016	0.025	1	CBCs	Scissor_pos_VS_Scissor_neg
KWMTBOMO05989	0.718448585552506	1.57248586110523	0.023	0.02	1	CBCs	Scissor_pos_VS_Scissor_neg
KWMTBOMO06251	0.291542097657178	1.57242955437347	0.016	0.027	1	CBCs	Scissor_pos_VS_Scissor_neg
KWMTBOMO04639	0.8044991477161	1.57214253003612	0.012	0.01	1	CBCs	Scissor_pos_VS_Scissor_neg
KWMTBOMO10327	0.144732177224679	1.57128242694323	0.137	0.114	1	CBCs	Scissor_pos_VS_Scissor_neg
KWMTBOMO00678	0.114548940521083	1.56942800371449	0.035	0.06	1	CBCs	Scissor_pos_VS_Scissor_neg
KWMTBOMO08882	0.385520913164978	1.56853414525912	0.135	0.124	1	CBCs	Scissor_pos_VS_Scissor_neg
KWMTBOMO01167	0.720158083551251	1.56837615302144	0.023	0.02	1	CBCs	Scissor_pos_VS_Scissor_neg
KWMTBOMO05261	0.442238964269319	1.56769559673405	0.021	0.03	1	CBCs	Scissor_pos_VS_Scissor_neg
KWMTBOMO04022	0.0441403646316973	1.5669580615891	0.016	0.04	1	CBCs	Scissor_pos_VS_Scissor_neg
KWMTBOMO00513	0.0697525613058996	1.5664222641964	0.023	0.047	1	CBCs	Scissor_pos_VS_Scissor_neg
KWMTBOMO07313	0.11162337726889	1.56534775802063	0.019	0.037	1	CBCs	Scissor_pos_VS_Scissor_neg
KWMTBOMO04474	0.017298925357281	1.56462860652983	0.012	0.037	1	CBCs	Scissor_pos_VS_Scissor_neg
KWMTBOMO03083	0.558109492689308	1.56453489761692	0.019	0.025	1	CBCs	Scissor_pos_VS_Scissor_neg
KWMTBOMO09464	0.203790825210121	1.56416092217867	0.13	0.179	1	CBCs	Scissor_pos_VS_Scissor_neg
KWMTBOMO14043	0.472975007123511	1.56332038365248	0.046	0.06	1	CBCs	Scissor_pos_VS_Scissor_neg
KWMTBOMO04029	0.905711419816862	1.56230697679428	0.032	0.035	1	CBCs	Scissor_pos_VS_Scissor_neg
KWMTBOMO07458	0.69322888601977	1.56168424733427	0.012	0.015	1	CBCs	Scissor_pos_VS_Scissor_neg
KWMTBOMO12603	0.27623934722997	1.56132895211556	0.097	0.132	1	CBCs	Scissor_pos_VS_Scissor_neg
KWMTBOMO08333	0.00492322425891705	1.56114263175407	0.058	0.119	1	CBCs	Scissor_pos_VS_Scissor_neg
KWMTBOMO14977	0.657232809899844	1.55949	0.035	0.03	1	CBCs	Scissor_pos_VS_Scissor_neg
KWMTBOMO03982	0.0441823265982219	1.55926544464306	0.012	0.032	1	CBCs	Scissor_pos_VS_Scissor_neg
KWMTBOMO12258	0.226794056371148	1.55858331799401	0.102	0.084	1	CBCs	Scissor_pos_VS_Scissor_neg
KWMTBOMO02473	0.906252766215369	1.55840370532248	0.023	0.025	1	CBCs	Scissor_pos_VS_Scissor_neg
KWMTBOMO04472	0.521853070831833	1.5573417894015	0.014	0.02	1	CBCs	Scissor_pos_VS_Scissor_neg
KWMTBOMO11677	0.0236925109361313	1.5569965020974	0.007	0.027	1	CBCs	Scissor_pos_VS_Scissor_neg
KWMTBOMO10540	0.0324657933262734	1.55470353093138	0.084	0.139	1	CBCs	Scissor_pos_VS_Scissor_neg
KWMTBOMO01032	0.197354427651578	1.55411860293386	0.044	0.067	1	CBCs	Scissor_pos_VS_Scissor_neg
KWMTBOMO08954	0.421023089867643	1.55399486812562	0.019	0.027	1	CBCs	Scissor_pos_VS_Scissor_neg
KWMTBOMO14295	0.00112310326686369	1.55285203375452	0.399	0.385	1	CBCs	Scissor_pos_VS_Scissor_neg
KWMTBOMO03303	0.531776695786839	1.55282062362561	0.012	0.007	1	CBCs	Scissor_pos_VS_Scissor_neg
KWMTBOMO03420	0.223295002387661	1.5528103462012	0.005	0.012	1	CBCs	Scissor_pos_VS_Scissor_neg
KWMTBOMO10139	0.732890149295463	1.55216172507922	0.023	0.027	1	CBCs	Scissor_pos_VS_Scissor_neg
KWMTBOMO11404	0.849703175619728	1.55195004515119	0.109	0.114	1	CBCs	Scissor_pos_VS_Scissor_neg
KWMTBOMO08322	0.334138116364955	1.55076537958156	0.051	0.069	1	CBCs	Scissor_pos_VS_Scissor_neg
KWMTBOMO12378	0.131593088984946	1.54807034248698	0.03	0.052	1	CBCs	Scissor_pos_VS_Scissor_neg
KWMTBOMO02685	0.541770299697656	1.54699032733989	0.016	0.022	1	CBCs	Scissor_pos_VS_Scissor_neg
KWMTBOMO04804	0.951109186271662	1.54621395625844	0.174	0.201	1	CBCs	Scissor_pos_VS_Scissor_neg
KWMTBOMO06123	0.314490794421318	1.5459352713533	0.009	0.017	1	CBCs	Scissor_pos_VS_Scissor_neg
KWMTBOMO16178	0.860485212820827	1.54481078067335	0.077	0.084	1	CBCs	Scissor_pos_VS_Scissor_neg
KWMTBOMO00901	0.111052580024271	1.54416396029537	0.074	0.112	1	CBCs	Scissor_pos_VS_Scissor_neg
KWMTBOMO11843	0.223295002387661	1.54367449548341	0.005	0.012	1	CBCs	Scissor_pos_VS_Scissor_neg
KWMTBOMO08624	0.498828386476538	1.54275208952689	0.012	0.017	1	CBCs	Scissor_pos_VS_Scissor_neg
KWMTBOMO02206	0.647477927147435	1.54242194385763	0.086	0.102	1	CBCs	Scissor_pos_VS_Scissor_neg
KWMTBOMO13490	0.966850751670433	1.54129422366852	0.06	0.062	1	CBCs	Scissor_pos_VS_Scissor_neg
KWMTBOMO09227	0.92148011506999	1.54008681715753	0.026	0.025	1	CBCs	Scissor_pos_VS_Scissor_neg
KWMTBOMO01484	0.362955407083471	1.5390577776588	0.014	0.007	1	CBCs	Scissor_pos_VS_Scissor_neg
KWMTBOMO12947	0.831972037020319	1.53715973128055	0.137	0.146	1	CBCs	Scissor_pos_VS_Scissor_neg
KWMTBOMO07562	0.852899237994495	1.53708138962252	0.086	0.087	1	CBCs	Scissor_pos_VS_Scissor_neg
KWMTBOMO00877	0.0280260495994638	1.53655182693484	0.012	0.035	1	CBCs	Scissor_pos_VS_Scissor_neg
KWMTBOMO04364	0.0302223732553041	1.53510560926198	0.039	0.077	1	CBCs	Scissor_pos_VS_Scissor_neg
KWMTBOMO15466	0.541853220167841	1.5348282251602	0.084	0.102	1	CBCs	Scissor_pos_VS_Scissor_neg
KWMTBOMO11584	0.849194199772665	1.53451464292991	0.051	0.05	1	CBCs	Scissor_pos_VS_Scissor_neg
KWMTBOMO03860	0.065857877309644	1.53370222553965	0.107	0.161	1	CBCs	Scissor_pos_VS_Scissor_neg
KWMTBOMO14837	0.122489813970466	1.53330833213872	0.014	0.03	1	CBCs	Scissor_pos_VS_Scissor_neg
KWMTBOMO00211	0.011475821981571	1.53257356847714	0.195	0.149	1	CBCs	Scissor_pos_VS_Scissor_neg
KWMTBOMO10964	0.837381100336314	1.53216874619415	0.014	0.012	1	CBCs	Scissor_pos_VS_Scissor_neg
KWMTBOMO14778	0.0833239107542192	1.53127782396538	0.014	0.032	1	CBCs	Scissor_pos_VS_Scissor_neg
KWMTBOMO05219	0.752497000548787	1.52900090537619	0.026	0.03	1	CBCs	Scissor_pos_VS_Scissor_neg
KWMTBOMO08253	0.740151447495884	1.5287954148444	0.021	0.025	1	CBCs	Scissor_pos_VS_Scissor_neg
KWMTBOMO10528	0.00811329698793806	1.52758205026733	0.039	0.087	1	CBCs	Scissor_pos_VS_Scissor_neg
KWMTBOMO08143	0.000833354206016765	1.5259578991478	0.392	0.38	1	CBCs	Scissor_pos_VS_Scissor_neg
KWMTBOMO16316	0.928271270871634	1.52434267696668	0.012	0.012	1	CBCs	Scissor_pos_VS_Scissor_neg
KWMTBOMO07555	0.386794730626969	1.52342723854145	0.046	0.062	1	CBCs	Scissor_pos_VS_Scissor_neg
KWMTBOMO08590	0.241225391375528	1.52274315494256	0.179	0.243	1	CBCs	Scissor_pos_VS_Scissor_neg
KWMTBOMO04782	0.548869872578418	1.52209247762141	0.063	0.077	1	CBCs	Scissor_pos_VS_Scissor_neg
KWMTBOMO05640	0.69322888601977	1.52145745587229	0.012	0.015	1	CBCs	Scissor_pos_VS_Scissor_neg
KWMTBOMO14079	0.803255625710975	1.52083911463969	0.012	0.01	1	CBCs	Scissor_pos_VS_Scissor_neg
KWMTBOMO15733	0.444727171219962	1.51831734547244	0.039	0.052	1	CBCs	Scissor_pos_VS_Scissor_neg
KWMTBOMO05132	0.62758716844006	1.51770623660532	0.271	0.315	1	CBCs	Scissor_pos_VS_Scissor_neg
KWMTBOMO02015	0.481291985258694	1.51753351719999	0.148	0.146	1	CBCs	Scissor_pos_VS_Scissor_neg
KWMTBOMO12109	0.0835223534300415	1.51680552761115	0.014	0.032	1	CBCs	Scissor_pos_VS_Scissor_neg
KWMTBOMO15714	0.311990464928183	1.51657839345567	0.019	0.03	1	CBCs	Scissor_pos_VS_Scissor_neg
KWMTBOMO14623	0.879822453829077	1.51615201357014	0.019	0.017	1	CBCs	Scissor_pos_VS_Scissor_neg
KWMTBOMO02647	0.941076	1.51252866834012	0.072	0.074	1	CBCs	Scissor_pos_VS_Scissor_neg
KWMTBOMO04631	0.23328653786602	1.51108806382505	0.03	0.047	1	CBCs	Scissor_pos_VS_Scissor_neg
KWMTBOMO10526	0.252374997895039	1.51037770283929	0.072	0.099	1	CBCs	Scissor_pos_VS_Scissor_neg
KWMTBOMO09583	0.836324977895325	1.51002047628584	0.063	0.062	1	CBCs	Scissor_pos_VS_Scissor_neg
KWMTBOMO15608	0.896462179437053	1.50775604437983	0.039	0.042	1	CBCs	Scissor_pos_VS_Scissor_neg
KWMTBOMO11333	0.23793697044391	1.5071478462547	0.012	0.022	1	CBCs	Scissor_pos_VS_Scissor_neg
KWMTBOMO13262	0.0262323715904651	1.50694848987997	0.005	0.022	1	CBCs	Scissor_pos_VS_Scissor_neg
KWMTBOMO16225	0.00783761159122023	1.50642222469006	0.039	0.087	1	CBCs	Scissor_pos_VS_Scissor_neg
KWMTBOMO13046	0.887007409495147	1.50543950308439	0.114	0.119	1	CBCs	Scissor_pos_VS_Scissor_neg
KWMTBOMO08706	0.393672953223074	1.50092526959862	0.111	0.141	1	CBCs	Scissor_pos_VS_Scissor_neg
KWMTBOMO07848	0.46595141258042	1.50073057167745	0.102	0.094	1	CBCs	Scissor_pos_VS_Scissor_neg
KWMTBOMO06265	0.692154706406916	1.50032941776086	0.012	0.015	1	CBCs	Scissor_pos_VS_Scissor_neg
KWMTBOMO07604	4.38778816623488e-07	1.50021849550122	0.478	0.434	0.00740658642460448	CBCs	Scissor_pos_VS_Scissor_neg
KWMTBOMO00205	0.975499169203829	1.49966732850345	0.049	0.05	1	CBCs	Scissor_pos_VS_Scissor_neg
KWMTBOMO07894	0.0262323715904651	1.4995309338163	0.005	0.022	1	CBCs	Scissor_pos_VS_Scissor_neg
KWMTBOMO08187	0.0371565197096768	1.49834555483879	0.292	0.28	1	CBCs	Scissor_pos_VS_Scissor_neg
KWMTBOMO04997	0.285731685370954	1.49778753255782	0.067	0.052	1	CBCs	Scissor_pos_VS_Scissor_neg
KWMTBOMO07480	0.69322888601977	1.49718050277902	0.012	0.015	1	CBCs	Scissor_pos_VS_Scissor_neg
KWMTBOMO01233	0.734058666179062	1.49581320142014	0.026	0.022	1	CBCs	Scissor_pos_VS_Scissor_neg
KWMTBOMO14795	0.922791501819834	1.49540872844237	0.014	0.015	1	CBCs	Scissor_pos_VS_Scissor_neg
KWMTBOMO01346	0.532591001655998	1.49485680116803	0.039	0.05	1	CBCs	Scissor_pos_VS_Scissor_neg
KWMTBOMO13720	0.466275619458507	1.49462996343485	0.009	0.015	1	CBCs	Scissor_pos_VS_Scissor_neg
KWMTBOMO11199	0.107095246101661	1.49439324075947	0.007	0.02	1	CBCs	Scissor_pos_VS_Scissor_neg
KWMTBOMO08407	0.407780413851784	1.49378376595213	0.035	0.047	1	CBCs	Scissor_pos_VS_Scissor_neg
KWMTBOMO16306	0.0507780881759238	1.49367837376001	0.081	0.132	1	CBCs	Scissor_pos_VS_Scissor_neg
KWMTBOMO05875	0.764768328902993	1.49262068811368	0.067	0.077	1	CBCs	Scissor_pos_VS_Scissor_neg
KWMTBOMO16033	0.485467379321449	1.49121633241081	0.086	0.107	1	CBCs	Scissor_pos_VS_Scissor_neg
KWMTBOMO13290	0.266224921704802	1.48935477960535	0.035	0.052	1	CBCs	Scissor_pos_VS_Scissor_neg
KWMTBOMO05745	0.532895328121505	1.4881273595041	0.012	0.007	1	CBCs	Scissor_pos_VS_Scissor_neg
KWMTBOMO02239	0.911799427242273	1.48791530275271	0.019	0.02	1	CBCs	Scissor_pos_VS_Scissor_neg
KWMTBOMO02694	0.418717049265227	1.48751450123872	0.125	0.117	1	CBCs	Scissor_pos_VS_Scissor_neg
KWMTBOMO02014	0.0894651710609475	1.48440173621652	0.028	0.052	1	CBCs	Scissor_pos_VS_Scissor_neg
KWMTBOMO10896	0.926481604267238	1.4831344654139	0.028	0.027	1	CBCs	Scissor_pos_VS_Scissor_neg
KWMTBOMO12920	0.301867235925006	1.48236613895646	0.225	0.226	1	CBCs	Scissor_pos_VS_Scissor_neg
KWMTBOMO13697	0.16564975423175	1.48221292301885	0.037	0.06	1	CBCs	Scissor_pos_VS_Scissor_neg
KWMTBOMO01349	0.817587485774844	1.4810018547129	0.058	0.065	1	CBCs	Scissor_pos_VS_Scissor_neg
KWMTBOMO04093	0.945532581468627	1.48003665858777	0.1	0.109	1	CBCs	Scissor_pos_VS_Scissor_neg
KWMTBOMO11068	9.65873350365859e-34	1.47948942688524	0.791	0.772	1.63039421541757e-29	CBCs	Scissor_pos_VS_Scissor_neg
KWMTBOMO01877	0.406260211554021	1.47767020890316	0.239	0.258	1	CBCs	Scissor_pos_VS_Scissor_neg
KWMTBOMO15208	0.0476429839384447	1.47708465107983	0.002	0.015	1	CBCs	Scissor_pos_VS_Scissor_neg
KWMTBOMO12441	0.131806844588471	1.47639921014039	0.005	0.015	1	CBCs	Scissor_pos_VS_Scissor_neg
KWMTBOMO02683	0.43027857451852	1.47545210195506	0.037	0.05	1	CBCs	Scissor_pos_VS_Scissor_neg
KWMTBOMO14248	0.294895839507127	1.47510549398778	0.081	0.109	1	CBCs	Scissor_pos_VS_Scissor_neg
KWMTBOMO11654	0.249373607879834	1.47435685283282	0.114	0.154	1	CBCs	Scissor_pos_VS_Scissor_neg
KWMTBOMO13313	0.17812115530782	1.4712607686034	0.042	0.065	1	CBCs	Scissor_pos_VS_Scissor_neg
KWMTBOMO00780	0.794396727894702	1.47110305502093	0.165	0.194	1	CBCs	Scissor_pos_VS_Scissor_neg
KWMTBOMO09917	0.132244120418265	1.47083005730528	0.005	0.015	1	CBCs	Scissor_pos_VS_Scissor_neg
KWMTBOMO07287	0.10606410579747	1.46916622686359	0.012	0.027	1	CBCs	Scissor_pos_VS_Scissor_neg
KWMTBOMO14225	0.771157338102297	1.46573940160841	0.195	0.233	1	CBCs	Scissor_pos_VS_Scissor_neg
KWMTBOMO05087	0.704342197034039	1.46523439689904	0.183	0.218	1	CBCs	Scissor_pos_VS_Scissor_neg
KWMTBOMO06273	0.0254974871787471	1.46488120791949	0.081	0.139	1	CBCs	Scissor_pos_VS_Scissor_neg
KWMTBOMO07824	0.129882392121973	1.46473642589017	0.03	0.052	1	CBCs	Scissor_pos_VS_Scissor_neg
KWMTBOMO09295	0.903446097990894	1.46388430411927	0.023	0.022	1	CBCs	Scissor_pos_VS_Scissor_neg
KWMTBOMO11099	2.27758242589697e-12	1.46335823959735	0.624	0.598	3.84455913491409e-08	CBCs	Scissor_pos_VS_Scissor_neg
KWMTBOMO14657	0.0396068145563786	1.45905456932852	0.007	0.025	1	CBCs	Scissor_pos_VS_Scissor_neg
KWMTBOMO15948	0.171598864854088	1.45825612308264	0.007	0.017	1	CBCs	Scissor_pos_VS_Scissor_neg
KWMTBOMO10397	0.000313164502614933	1.45723163513397	0.501	0.526	1	CBCs	Scissor_pos_VS_Scissor_neg
KWMTBOMO09691	0.143942863930795	1.4562849449588	0.042	0.067	1	CBCs	Scissor_pos_VS_Scissor_neg
KWMTBOMO08637	0.615885485299172	1.45574914751008	0.058	0.052	1	CBCs	Scissor_pos_VS_Scissor_neg
KWMTBOMO03936	0.0246088805940329	1.45396746993032	0.798	0.985	1	CBCs	Scissor_pos_VS_Scissor_neg
KWMTBOMO10612	0.901875550082964	1.45255504104782	0.118	0.132	1	CBCs	Scissor_pos_VS_Scissor_neg
KWMTBOMO05070	0.401599661181772	1.45178614533769	0.026	0.017	1	CBCs	Scissor_pos_VS_Scissor_neg
KWMTBOMO00752	0.291891273950445	1.45151817993673	0.012	0.005	1	CBCs	Scissor_pos_VS_Scissor_neg
KWMTBOMO07827	0.132244120418265	1.45010705243489	0.005	0.015	1	CBCs	Scissor_pos_VS_Scissor_neg
KWMTBOMO04819	0.673710079435162	1.44837465314257	0.044	0.052	1	CBCs	Scissor_pos_VS_Scissor_neg
KWMTBOMO02007	0.196469655659641	1.44754766352448	0.046	0.069	1	CBCs	Scissor_pos_VS_Scissor_neg
KWMTBOMO07969	0.166178871843215	1.44644617233079	0.049	0.074	1	CBCs	Scissor_pos_VS_Scissor_neg
KWMTBOMO08604	0.507807180381245	1.44569497466951	0.021	0.015	1	CBCs	Scissor_pos_VS_Scissor_neg
KWMTBOMO04169	0.0645602809670296	1.44549376199689	0.028	0.055	1	CBCs	Scissor_pos_VS_Scissor_neg
KWMTBOMO07065	0.173037914822472	1.44484096097303	0.007	0.017	1	CBCs	Scissor_pos_VS_Scissor_neg
KWMTBOMO13646	0.646429642873559	1.4447819400897	0.007	0.01	1	CBCs	Scissor_pos_VS_Scissor_neg
KWMTBOMO09272	0.191284508717266	1.44446760515105	0.111	0.154	1	CBCs	Scissor_pos_VS_Scissor_neg
KWMTBOMO08871	0.26721145580894	1.44446359283822	0.014	0.025	1	CBCs	Scissor_pos_VS_Scissor_neg
KWMTBOMO05635	0.946734832008973	1.44369283660964	0.051	0.052	1	CBCs	Scissor_pos_VS_Scissor_neg
KWMTBOMO08385	0.464187202268724	1.44348224808797	0.019	0.012	1	CBCs	Scissor_pos_VS_Scissor_neg
KWMTBOMO08511	0.168356294602675	1.44292232110944	0.116	0.164	1	CBCs	Scissor_pos_VS_Scissor_neg
KWMTBOMO05792	0.330613386930409	1.4428501716286	0.035	0.05	1	CBCs	Scissor_pos_VS_Scissor_neg
KWMTBOMO11450	0.266268494118146	1.4418123938401	0.026	0.015	1	CBCs	Scissor_pos_VS_Scissor_neg
KWMTBOMO11405	0.204534207685918	1.43955828693047	0.016	0.03	1	CBCs	Scissor_pos_VS_Scissor_neg
KWMTBOMO01838	0.492631257316542	1.4394763315587	0.093	0.084	1	CBCs	Scissor_pos_VS_Scissor_neg
KWMTBOMO12056	0.239639453378126	1.43905888135117	0.22	0.221	1	CBCs	Scissor_pos_VS_Scissor_neg
KWMTBOMO16131	0.115638966586958	1.43718672265586	0.095	0.139	1	CBCs	Scissor_pos_VS_Scissor_neg
KWMTBOMO15307	0.336404582598613	1.43628542792481	0.139	0.129	1	CBCs	Scissor_pos_VS_Scissor_neg
KWMTBOMO12048	0.806782456802399	1.43579069885305	0.093	0.094	1	CBCs	Scissor_pos_VS_Scissor_neg
KWMTBOMO06158	0.0775895019219589	1.4354461433188	0.005	0.017	1	CBCs	Scissor_pos_VS_Scissor_neg
KWMTBOMO05207	0.527004048859963	1.43305272922782	0.079	0.097	1	CBCs	Scissor_pos_VS_Scissor_neg
KWMTBOMO04433	0.0335318555869994	1.43256123078757	0.023	0.052	1	CBCs	Scissor_pos_VS_Scissor_neg
KWMTBOMO05752	0.832834956684728	1.43235231439059	0.014	0.012	1	CBCs	Scissor_pos_VS_Scissor_neg
KWMTBOMO15468	0.927058893849866	1.43222447128292	0.012	0.012	1	CBCs	Scissor_pos_VS_Scissor_neg
KWMTBOMO04201	0.010357311159993	1.4321060634609	0.053	0.107	1	CBCs	Scissor_pos_VS_Scissor_neg
KWMTBOMO06876	0.542498143415804	1.43092503026531	0.095	0.117	1	CBCs	Scissor_pos_VS_Scissor_neg
KWMTBOMO06269	0.202980468591311	1.42987935722067	0.035	0.055	1	CBCs	Scissor_pos_VS_Scissor_neg
KWMTBOMO05972	0.886926937408036	1.42952863767658	0.021	0.02	1	CBCs	Scissor_pos_VS_Scissor_neg
KWMTBOMO10507	0.131418080598539	1.42763091193353	0.067	0.102	1	CBCs	Scissor_pos_VS_Scissor_neg
KWMTBOMO09022	0.300319243525909	1.42694799733538	0.042	0.06	1	CBCs	Scissor_pos_VS_Scissor_neg
KWMTBOMO05600	0.305099787819943	1.42518	0.128	0.169	1	CBCs	Scissor_pos_VS_Scissor_neg
KWMTBOMO10021	0.0685323008128983	1.42484393626321	0.012	0.03	1	CBCs	Scissor_pos_VS_Scissor_neg
KWMTBOMO12403	0.766954115893581	1.42469800441382	0.032	0.037	1	CBCs	Scissor_pos_VS_Scissor_neg
KWMTBOMO04026	0.929330802719902	1.42421128094013	0.088	0.092	1	CBCs	Scissor_pos_VS_Scissor_neg
KWMTBOMO09827	0.309480288931526	1.42285594634421	0.03	0.045	1	CBCs	Scissor_pos_VS_Scissor_neg
KWMTBOMO01827	0.847295106061543	1.42245851114496	0.109	0.122	1	CBCs	Scissor_pos_VS_Scissor_neg
KWMTBOMO09814	0.0031404559375251	1.42234116657296	0.016	0.055	1	CBCs	Scissor_pos_VS_Scissor_neg
KWMTBOMO01189	0.220715261709863	1.42170569069305	0.028	0.045	1	CBCs	Scissor_pos_VS_Scissor_neg
KWMTBOMO00051	0.394010206936076	1.42159757444934	0.248	0.266	1	CBCs	Scissor_pos_VS_Scissor_neg
KWMTBOMO09714	0.1794583070705	1.42052617368239	0.339	0.367	1	CBCs	Scissor_pos_VS_Scissor_neg
KWMTBOMO09534	0.0773061857829278	1.41968230666759	0.088	0.136	1	CBCs	Scissor_pos_VS_Scissor_neg
KWMTBOMO02583	0.00496640306545325	1.41963258262744	0.148	0.253	1	CBCs	Scissor_pos_VS_Scissor_neg
KWMTBOMO12286	7.31028508584746e-65	1.41955439189637	0.965	0.988	1.23397612249105e-60	CBCs	Scissor_pos_VS_Scissor_neg
KWMTBOMO00111	0.107095246101661	1.41911764649667	0.007	0.02	1	CBCs	Scissor_pos_VS_Scissor_neg
KWMTBOMO10949	0.0142045766749146	1.41847979422247	0.056	0.107	1	CBCs	Scissor_pos_VS_Scissor_neg
KWMTBOMO02134	0.808232670729402	1.41791723088167	0.012	0.01	1	CBCs	Scissor_pos_VS_Scissor_neg
KWMTBOMO11276	0.165890943438957	1.41549788604039	0.079	0.057	1	CBCs	Scissor_pos_VS_Scissor_neg
KWMTBOMO14869	0.749041597990192	1.41543496922921	0.03	0.035	1	CBCs	Scissor_pos_VS_Scissor_neg
KWMTBOMO01024	0.362548445984687	1.41469671117575	0.026	0.037	1	CBCs	Scissor_pos_VS_Scissor_neg
KWMTBOMO06624	0.735114239649372	1.4144443093435	0.021	0.025	1	CBCs	Scissor_pos_VS_Scissor_neg
KWMTBOMO00704	0.41880507397153	1.41375239759169	0.035	0.047	1	CBCs	Scissor_pos_VS_Scissor_neg
KWMTBOMO10210	0.105802682501875	1.41335561086848	0.012	0.027	1	CBCs	Scissor_pos_VS_Scissor_neg
KWMTBOMO01871	0.0940841534653465	1.41156493388194	0.032	0.015	1	CBCs	Scissor_pos_VS_Scissor_neg
KWMTBOMO08144	0.22360307046736	1.41034905511407	0.125	0.169	1	CBCs	Scissor_pos_VS_Scissor_neg
KWMTBOMO05514	0.918546299666011	1.40902456189905	0.056	0.06	1	CBCs	Scissor_pos_VS_Scissor_neg
KWMTBOMO05214	0.23793697044391	1.40877951537634	0.012	0.022	1	CBCs	Scissor_pos_VS_Scissor_neg
KWMTBOMO01255	0.504948056932845	1.40832137870744	0.102	0.094	1	CBCs	Scissor_pos_VS_Scissor_neg
KWMTBOMO12434	0.0649252952826999	1.40576724569445	0.028	0.055	1	CBCs	Scissor_pos_VS_Scissor_neg
KWMTBOMO06600	0.82025924648226	1.40568873445149	0.053	0.052	1	CBCs	Scissor_pos_VS_Scissor_neg
KWMTBOMO04820	0.592481977046891	1.40534051692404	0.028	0.022	1	CBCs	Scissor_pos_VS_Scissor_neg
KWMTBOMO07251	0.267567217984396	1.40336101516254	0.063	0.087	1	CBCs	Scissor_pos_VS_Scissor_neg
KWMTBOMO04468	0.273695934935116	1.40314883973919	0.007	0.015	1	CBCs	Scissor_pos_VS_Scissor_neg
KWMTBOMO06004	0.687864196175712	1.40290503790979	0.012	0.015	1	CBCs	Scissor_pos_VS_Scissor_neg
KWMTBOMO02991	0.0289326081097451	1.40234680132437	0.364	0.365	1	CBCs	Scissor_pos_VS_Scissor_neg
KWMTBOMO09063	0.656368496724461	1.40161890573049	0.072	0.084	1	CBCs	Scissor_pos_VS_Scissor_neg
KWMTBOMO05515	0.580152120363711	1.40003151734439	0.097	0.092	1	CBCs	Scissor_pos_VS_Scissor_neg
KWMTBOMO05303	0.98269192191805	1.39964434708495	0.167	0.194	1	CBCs	Scissor_pos_VS_Scissor_neg
KWMTBOMO08946	0.489187058688335	1.39772479547024	0.146	0.141	1	CBCs	Scissor_pos_VS_Scissor_neg
KWMTBOMO15734	0.0231017945916767	1.39770177013537	0.014	0.04	1	CBCs	Scissor_pos_VS_Scissor_neg
KWMTBOMO02419	0.46720975389108	1.39735449141806	0.009	0.015	1	CBCs	Scissor_pos_VS_Scissor_neg
KWMTBOMO09662	0.331614272755789	1.39713400956532	0.021	0.032	1	CBCs	Scissor_pos_VS_Scissor_neg
KWMTBOMO10159	0.174065320288501	1.39685747524128	0.086	0.122	1	CBCs	Scissor_pos_VS_Scissor_neg
KWMTBOMO02549	0.697442600917815	1.39531515925889	0.014	0.017	1	CBCs	Scissor_pos_VS_Scissor_neg
KWMTBOMO03011	0.105649025803887	1.39424921991079	0.204	0.181	1	CBCs	Scissor_pos_VS_Scissor_neg
KWMTBOMO16299	0.0254188482274296	1.39378687860987	0.223	0.189	1	CBCs	Scissor_pos_VS_Scissor_neg
KWMTBOMO00425	0.352296669142576	1.39347849775531	0.23	0.236	1	CBCs	Scissor_pos_VS_Scissor_neg
KWMTBOMO04569	0.105541770559362	1.39048176102705	0.012	0.027	1	CBCs	Scissor_pos_VS_Scissor_neg
KWMTBOMO10548	0.471767817467948	1.38793293552421	0.026	0.035	1	CBCs	Scissor_pos_VS_Scissor_neg
KWMTBOMO07193	0.0800708815226819	1.38785320463468	0.067	0.107	1	CBCs	Scissor_pos_VS_Scissor_neg
KWMTBOMO02325	0.727277237567116	1.38744601522036	0.063	0.072	1	CBCs	Scissor_pos_VS_Scissor_neg
KWMTBOMO15561	0.0704537050184243	1.38696304353262	0.023	0.047	1	CBCs	Scissor_pos_VS_Scissor_neg
KWMTBOMO08282	0.0124688195236685	1.38342696724292	0.009	0.035	1	CBCs	Scissor_pos_VS_Scissor_neg
KWMTBOMO14799	0.0180942121161322	1.38230189845889	0.07	0.124	1	CBCs	Scissor_pos_VS_Scissor_neg
KWMTBOMO11005	0.12337156674845	1.38058344372459	0.313	0.333	1	CBCs	Scissor_pos_VS_Scissor_neg
KWMTBOMO01613	0.233965120168441	1.38027872290068	0.03	0.047	1	CBCs	Scissor_pos_VS_Scissor_neg
KWMTBOMO11221	0.132244120418265	1.37931178336655	0.005	0.015	1	CBCs	Scissor_pos_VS_Scissor_neg
KWMTBOMO08400	0.071919658202027	1.37912321674203	0.03	0.057	1	CBCs	Scissor_pos_VS_Scissor_neg
KWMTBOMO05982	0.0452240018234361	1.37884696821623	0.005	0.02	1	CBCs	Scissor_pos_VS_Scissor_neg
KWMTBOMO05542	0.908820779789313	1.37844302911509	0.037	0.04	1	CBCs	Scissor_pos_VS_Scissor_neg
KWMTBOMO15682	0.164737786430006	1.37792317843787	0.028	0.047	1	CBCs	Scissor_pos_VS_Scissor_neg
KWMTBOMO15710	0.096023669265814	1.37731165909277	0.086	0.129	1	CBCs	Scissor_pos_VS_Scissor_neg
KWMTBOMO05893	0.366084584190497	1.37612332182137	0.026	0.037	1	CBCs	Scissor_pos_VS_Scissor_neg
KWMTBOMO03957	0.633418871224197	1.3755322831191	0.016	0.012	1	CBCs	Scissor_pos_VS_Scissor_neg
KWMTBOMO16087	8.96141169952399e-62	1.37498349889165	0.998	0.97	1.51268629487965e-57	CBCs	Scissor_pos_VS_Scissor_neg
KWMTBOMO01505	0.819521269480121	1.37473185524736	0.053	0.06	1	CBCs	Scissor_pos_VS_Scissor_neg
KWMTBOMO05211	0.00366413424578677	1.37467641608684	0.021	0.062	1	CBCs	Scissor_pos_VS_Scissor_neg
KWMTBOMO10796	0.00924740028385207	1.37427928631753	0.014	0.045	1	CBCs	Scissor_pos_VS_Scissor_neg
KWMTBOMO06473	0.0289684225436299	1.37350112810498	0.211	0.176	1	CBCs	Scissor_pos_VS_Scissor_neg
KWMTBOMO08806	0.786750906363269	1.37228722184245	0.132	0.154	1	CBCs	Scissor_pos_VS_Scissor_neg
KWMTBOMO10143	0.269822760690609	1.37027843867714	0.026	0.015	1	CBCs	Scissor_pos_VS_Scissor_neg
KWMTBOMO06168	0.00556824086692609	1.37022208991677	0.021	0.06	1	CBCs	Scissor_pos_VS_Scissor_neg
KWMTBOMO01091	0.165834116505694	1.3669746041882	0.13	0.107	1	CBCs	Scissor_pos_VS_Scissor_neg
KWMTBOMO16223	0.018894136358334	1.36577	0.021	0.052	1	CBCs	Scissor_pos_VS_Scissor_neg
KWMTBOMO11821	0.278983576921622	1.36521641324192	0.026	0.04	1	CBCs	Scissor_pos_VS_Scissor_neg
KWMTBOMO01518	0.244238727508787	1.36520170105615	0.093	0.127	1	CBCs	Scissor_pos_VS_Scissor_neg
KWMTBOMO15210	0.664525991034551	1.3630673982032	0.019	0.015	1	CBCs	Scissor_pos_VS_Scissor_neg
KWMTBOMO05203	0.0688279835897942	1.36302432261445	0.35	0.39	1	CBCs	Scissor_pos_VS_Scissor_neg
KWMTBOMO07505	0.196478316934053	1.36259625103088	0.035	0.055	1	CBCs	Scissor_pos_VS_Scissor_neg
KWMTBOMO08627	0.0129070550700109	1.36248485010594	0.216	0.171	1	CBCs	Scissor_pos_VS_Scissor_neg
KWMTBOMO15673	0.0856992806400897	1.3621396237995	0.009	0.025	1	CBCs	Scissor_pos_VS_Scissor_neg
KWMTBOMO05645	0.679471534234928	1.36200258882185	0.148	0.151	1	CBCs	Scissor_pos_VS_Scissor_neg
KWMTBOMO02318	0.802057027623122	1.36088250197245	0.111	0.114	1	CBCs	Scissor_pos_VS_Scissor_neg
KWMTBOMO00708	0.503812132157741	1.36036411469582	0.021	0.015	1	CBCs	Scissor_pos_VS_Scissor_neg
KWMTBOMO03646	0.798199927855821	1.35835723118038	0.204	0.246	1	CBCs	Scissor_pos_VS_Scissor_neg
KWMTBOMO08500	0.927058893849866	1.35780777005189	0.012	0.012	1	CBCs	Scissor_pos_VS_Scissor_neg
KWMTBOMO02297	0.469081132075353	1.35701666447307	0.009	0.015	1	CBCs	Scissor_pos_VS_Scissor_neg
KWMTBOMO06441	0.744067156423595	1.35611993448252	0.144	0.169	1	CBCs	Scissor_pos_VS_Scissor_neg
KWMTBOMO01866	0.468742559094094	1.35598665555375	0.22	0.28	1	CBCs	Scissor_pos_VS_Scissor_neg
KWMTBOMO03415	0.0832027846946218	1.35526611705618	0.139	0.206	1	CBCs	Scissor_pos_VS_Scissor_neg
KWMTBOMO05588	0.00338066354637462	1.35440333641236	0.032	0.082	1	CBCs	Scissor_pos_VS_Scissor_neg
KWMTBOMO04807	0.0413824923866513	1.35404987050965	0.07	0.117	1	CBCs	Scissor_pos_VS_Scissor_neg
KWMTBOMO06823	0.122319620818885	1.35356117147914	0.144	0.203	1	CBCs	Scissor_pos_VS_Scissor_neg
KWMTBOMO09153	0.166344219774149	1.35105619951588	0.028	0.047	1	CBCs	Scissor_pos_VS_Scissor_neg
KWMTBOMO06244	0.0153986905507052	1.35057289048143	0.028	0.065	1	CBCs	Scissor_pos_VS_Scissor_neg
KWMTBOMO03503	0.45170161140418	1.3501619496504	0.093	0.117	1	CBCs	Scissor_pos_VS_Scissor_neg
KWMTBOMO06892	0.0226055430904736	1.34956389635342	0.014	0.04	1	CBCs	Scissor_pos_VS_Scissor_neg
KWMTBOMO14760	0.237085220095643	1.34943223131487	0.021	0.035	1	CBCs	Scissor_pos_VS_Scissor_neg
KWMTBOMO14331	0.125792871000926	1.34856844742665	0.114	0.164	1	CBCs	Scissor_pos_VS_Scissor_neg
KWMTBOMO07438	0.630442714542122	1.34787171731856	0.016	0.012	1	CBCs	Scissor_pos_VS_Scissor_neg
KWMTBOMO02565	0.261337793932133	1.34571342609625	0.035	0.052	1	CBCs	Scissor_pos_VS_Scissor_neg
KWMTBOMO08495	0.565140216464004	1.34535928566487	0.042	0.035	1	CBCs	Scissor_pos_VS_Scissor_neg
KWMTBOMO01145	0.492096361487208	1.34427040016672	0.03	0.04	1	CBCs	Scissor_pos_VS_Scissor_neg
KWMTBOMO05469	0.322097279996999	1.34385967779701	0.211	0.213	1	CBCs	Scissor_pos_VS_Scissor_neg
KWMTBOMO00588	0.00453172279578384	1.34378147324775	0.028	0.072	1	CBCs	Scissor_pos_VS_Scissor_neg
KWMTBOMO08803	0.291891273950445	1.34175651647675	0.012	0.005	1	CBCs	Scissor_pos_VS_Scissor_neg
KWMTBOMO04328	0.0498016763667225	1.34117274842435	0.03	0.06	1	CBCs	Scissor_pos_VS_Scissor_neg
KWMTBOMO12325	0.396357332054837	1.34049137595924	0.084	0.107	1	CBCs	Scissor_pos_VS_Scissor_neg
KWMTBOMO09495	0.335160594184169	1.33968740424974	0.035	0.05	1	CBCs	Scissor_pos_VS_Scissor_neg
KWMTBOMO03116	0.370323369717583	1.3394152833281	0.1	0.127	1	CBCs	Scissor_pos_VS_Scissor_neg
KWMTBOMO00443	0.0775895019219589	1.33438160091145	0.005	0.017	1	CBCs	Scissor_pos_VS_Scissor_neg
KWMTBOMO09494	0.387987896255131	1.33429106007115	0.07	0.057	1	CBCs	Scissor_pos_VS_Scissor_neg
KWMTBOMO16224	0.0434489248071106	1.33309126316805	0.165	0.127	1	CBCs	Scissor_pos_VS_Scissor_neg
KWMTBOMO12185	0.173037914822472	1.33139241659467	0.007	0.017	1	CBCs	Scissor_pos_VS_Scissor_neg
KWMTBOMO12945	0.295237800674585	1.33086245850872	0.012	0.005	1	CBCs	Scissor_pos_VS_Scissor_neg
KWMTBOMO02441	0.315191632662665	1.32914521187779	0.009	0.017	1	CBCs	Scissor_pos_VS_Scissor_neg
KWMTBOMO13523	0.435453251426669	1.32908193008407	0.06	0.077	1	CBCs	Scissor_pos_VS_Scissor_neg
KWMTBOMO11304	0.0706793508797786	1.32862966535718	0.06	0.099	1	CBCs	Scissor_pos_VS_Scissor_neg
KWMTBOMO00273	0.0422914576912413	1.32845403898993	0.012	0.032	1	CBCs	Scissor_pos_VS_Scissor_neg
KWMTBOMO14762	0.176231865763831	1.3282451650356	0.03	0.05	1	CBCs	Scissor_pos_VS_Scissor_neg
KWMTBOMO05076	0.210310548577601	1.32745815196912	0.093	0.129	1	CBCs	Scissor_pos_VS_Scissor_neg
KWMTBOMO09733	0.661711981919798	1.32739805823344	0.019	0.015	1	CBCs	Scissor_pos_VS_Scissor_neg
KWMTBOMO06559	0.0557523535969718	1.32651246413272	0.039	0.072	1	CBCs	Scissor_pos_VS_Scissor_neg
KWMTBOMO04023	0.348716485542683	1.32520503402866	0.012	0.02	1	CBCs	Scissor_pos_VS_Scissor_neg
KWMTBOMO14439	0.306149806421678	1.32518186491928	0.03	0.045	1	CBCs	Scissor_pos_VS_Scissor_neg
KWMTBOMO04380	0.00436742611253011	1.32463575920197	0.051	0.109	1	CBCs	Scissor_pos_VS_Scissor_neg
KWMTBOMO04001	0.131593088984946	1.32432244598543	0.03	0.052	1	CBCs	Scissor_pos_VS_Scissor_neg
KWMTBOMO04441	0.142840172985927	1.32428963009186	0.016	0.032	1	CBCs	Scissor_pos_VS_Scissor_neg
KWMTBOMO11859	3.28873313892327e-17	1.32387407830939	0.733	0.725	5.55138153850248e-13	CBCs	Scissor_pos_VS_Scissor_neg
KWMTBOMO01488	0.379552619625524	1.32246721877884	0.158	0.203	1	CBCs	Scissor_pos_VS_Scissor_neg
KWMTBOMO14767	0.880609368918079	1.3222940745535	0.144	0.164	1	CBCs	Scissor_pos_VS_Scissor_neg
KWMTBOMO00858	0.561396567338627	1.32209089057058	0.118	0.114	1	CBCs	Scissor_pos_VS_Scissor_neg
KWMTBOMO03831	0.0173909522476165	1.32128558034817	0.053	0.102	1	CBCs	Scissor_pos_VS_Scissor_neg
KWMTBOMO10320	0.00592551840136561	1.3212056142781	0.03	0.074	1	CBCs	Scissor_pos_VS_Scissor_neg
KWMTBOMO09015	0.316196805651673	1.32117518073732	0.153	0.144	1	CBCs	Scissor_pos_VS_Scissor_neg
KWMTBOMO03217	0.0262620445923475	1.32115106978776	0.026	0.057	1	CBCs	Scissor_pos_VS_Scissor_neg
KWMTBOMO00875	0.00701250650036693	1.3192574371459	0.032	0.077	1	CBCs	Scissor_pos_VS_Scissor_neg
KWMTBOMO10130	0.989746117836549	1.31818505165452	0.158	0.176	1	CBCs	Scissor_pos_VS_Scissor_neg
KWMTBOMO09047	0.132244120418265	1.31628096208698	0.005	0.015	1	CBCs	Scissor_pos_VS_Scissor_neg
KWMTBOMO15117	0.223295002387661	1.31616734607887	0.005	0.012	1	CBCs	Scissor_pos_VS_Scissor_neg
KWMTBOMO07532	0.0815550616375901	1.31609120783515	0.014	0.032	1	CBCs	Scissor_pos_VS_Scissor_neg
KWMTBOMO12300	0.173037914822472	1.31591904999228	0.007	0.017	1	CBCs	Scissor_pos_VS_Scissor_neg
KWMTBOMO04398	0.348716485542683	1.31539953973762	0.012	0.02	1	CBCs	Scissor_pos_VS_Scissor_neg
KWMTBOMO05624	0.633418871224197	1.31502218907513	0.016	0.012	1	CBCs	Scissor_pos_VS_Scissor_neg
KWMTBOMO08526	0.783027758130063	1.31496492356821	0.079	0.077	1	CBCs	Scissor_pos_VS_Scissor_neg
KWMTBOMO11808	0.949305600056359	1.31488692119186	0.09	0.094	1	CBCs	Scissor_pos_VS_Scissor_neg
KWMTBOMO02650	0.853216821631393	1.31380440785168	0.153	0.176	1	CBCs	Scissor_pos_VS_Scissor_neg
KWMTBOMO10477	0.142669128162063	1.31305492438814	0.032	0.055	1	CBCs	Scissor_pos_VS_Scissor_neg
KWMTBOMO14923	0.0126305477796311	1.31251907427797	0.009	0.035	1	CBCs	Scissor_pos_VS_Scissor_neg
KWMTBOMO10045	0.378942989455344	1.31163361255004	0.028	0.04	1	CBCs	Scissor_pos_VS_Scissor_neg
KWMTBOMO04129	0.0823216774652284	1.31048156516897	0.116	0.174	1	CBCs	Scissor_pos_VS_Scissor_neg
KWMTBOMO13605	0.0025503572267397	1.30823363752735	0.03	0.079	1	CBCs	Scissor_pos_VS_Scissor_neg
KWMTBOMO06367	0.927842767521695	1.30665389351422	0.03	0.03	1	CBCs	Scissor_pos_VS_Scissor_neg
KWMTBOMO07380	0.463173676008833	1.30622903351526	0.049	0.062	1	CBCs	Scissor_pos_VS_Scissor_neg
KWMTBOMO11183	0.419098443195774	1.30602323222516	0.019	0.027	1	CBCs	Scissor_pos_VS_Scissor_neg
KWMTBOMO06538	0.16126261620833	1.30556698632604	0.269	0.275	1	CBCs	Scissor_pos_VS_Scissor_neg
KWMTBOMO05266	0.416073354095567	1.30517253519887	0.079	0.102	1	CBCs	Scissor_pos_VS_Scissor_neg
KWMTBOMO01034	0.0440620915269119	1.30480649247341	0.012	0.032	1	CBCs	Scissor_pos_VS_Scissor_neg
KWMTBOMO14773	0.00232432796532601	1.30275546171878	0.077	0.154	1	CBCs	Scissor_pos_VS_Scissor_neg
KWMTBOMO09658	0.00880435529416231	1.30178442621131	0.042	0.089	1	CBCs	Scissor_pos_VS_Scissor_neg
KWMTBOMO03485	0.907017666394051	1.30172052221469	0.035	0.037	1	CBCs	Scissor_pos_VS_Scissor_neg
KWMTBOMO16454	0.0586038015082594	1.30159137117317	0.128	0.191	1	CBCs	Scissor_pos_VS_Scissor_neg
KWMTBOMO05447	0.239482533791784	1.29982519744737	0.012	0.022	1	CBCs	Scissor_pos_VS_Scissor_neg
KWMTBOMO13891	0.861646638198243	1.29948009580525	0.016	0.015	1	CBCs	Scissor_pos_VS_Scissor_neg
KWMTBOMO06178	0.585244020637955	1.29931015204429	0.172	0.176	1	CBCs	Scissor_pos_VS_Scissor_neg
KWMTBOMO11235	0.577468321806728	1.2969867362446	0.051	0.062	1	CBCs	Scissor_pos_VS_Scissor_neg
KWMTBOMO15310	0.606573968685396	1.2968342571449	0.058	0.069	1	CBCs	Scissor_pos_VS_Scissor_neg
KWMTBOMO00195	0.00242226510796099	1.29639180881106	0.026	0.072	1	CBCs	Scissor_pos_VS_Scissor_neg
KWMTBOMO10664	0.0432542734495473	1.29603840697872	0.1	0.159	1	CBCs	Scissor_pos_VS_Scissor_neg
KWMTBOMO12165	0.00768245995623928	1.29518884071591	0.07	0.132	1	CBCs	Scissor_pos_VS_Scissor_neg
KWMTBOMO07118	0.252317	1.29409235428554	0.032	0.05	1	CBCs	Scissor_pos_VS_Scissor_neg
KWMTBOMO05440	0.0452240018234361	1.29338424243289	0.005	0.02	1	CBCs	Scissor_pos_VS_Scissor_neg
KWMTBOMO07005	0.315893496294219	1.29328630243525	0.009	0.017	1	CBCs	Scissor_pos_VS_Scissor_neg
KWMTBOMO04600	0.00152661666716314	1.29328389078919	0.012	0.05	1	CBCs	Scissor_pos_VS_Scissor_neg
KWMTBOMO15244	0.275008893617745	1.29324689864354	0.051	0.072	1	CBCs	Scissor_pos_VS_Scissor_neg
KWMTBOMO14771	0.170007546687292	1.29269217264301	0.063	0.042	1	CBCs	Scissor_pos_VS_Scissor_neg
KWMTBOMO13977	0.72178660757744	1.29257535886398	0.019	0.022	1	CBCs	Scissor_pos_VS_Scissor_neg
KWMTBOMO04686	0.00494418749270943	1.29248019469904	0.053	0.112	1	CBCs	Scissor_pos_VS_Scissor_neg
KWMTBOMO13980	0.0212039169669967	1.29133673709388	0.046	0.089	1	CBCs	Scissor_pos_VS_Scissor_neg
KWMTBOMO05043	0.371802880567051	1.2901233951246	0.005	0.01	1	CBCs	Scissor_pos_VS_Scissor_neg
KWMTBOMO06243	0.86586268903544	1.2865856411837	0.016	0.015	1	CBCs	Scissor_pos_VS_Scissor_neg
KWMTBOMO03308	0.067525965320579	1.28645395429024	0.044	0.077	1	CBCs	Scissor_pos_VS_Scissor_neg
KWMTBOMO04776	0.793175061122075	1.28603835636042	0.111	0.127	1	CBCs	Scissor_pos_VS_Scissor_neg
KWMTBOMO10437	0.0716227568358504	1.28554663786006	0.128	0.191	1	CBCs	Scissor_pos_VS_Scissor_neg
KWMTBOMO04132	0.068627275111973	1.28518309394079	0.03	0.057	1	CBCs	Scissor_pos_VS_Scissor_neg
KWMTBOMO07948	0.0190504073788571	1.2847135739141	0.07	0.124	1	CBCs	Scissor_pos_VS_Scissor_neg
KWMTBOMO01513	0.442238964269319	1.28393696304943	0.021	0.03	1	CBCs	Scissor_pos_VS_Scissor_neg
KWMTBOMO14269	0.315147085112817	1.28325914076212	0.209	0.278	1	CBCs	Scissor_pos_VS_Scissor_neg
KWMTBOMO11377	0.928448396428195	1.28265056885592	0.111	0.119	1	CBCs	Scissor_pos_VS_Scissor_neg
KWMTBOMO07626	0.0264149013093619	1.28210550191522	0.002	0.017	1	CBCs	Scissor_pos_VS_Scissor_neg
KWMTBOMO10293	0.745830139845045	1.28112820759036	0.248	0.283	1	CBCs	Scissor_pos_VS_Scissor_neg
KWMTBOMO07750	0.273002911119966	1.28057460975488	0.084	0.112	1	CBCs	Scissor_pos_VS_Scissor_neg
KWMTBOMO06288	0.0526708688850262	1.28038867948346	0.037	0.069	1	CBCs	Scissor_pos_VS_Scissor_neg
KWMTBOMO03115	0.899006272988716	1.27997429864973	0.021	0.02	1	CBCs	Scissor_pos_VS_Scissor_neg
KWMTBOMO06601	0.0446209464745983	1.27977496253198	0.116	0.181	1	CBCs	Scissor_pos_VS_Scissor_neg
KWMTBOMO01088	4.87694037128495e-32	1.27881927290779	0.842	0.846	8.23227534672899e-28	CBCs	Scissor_pos_VS_Scissor_neg
KWMTBOMO14792	0.348027380131754	1.27858987662367	0.012	0.02	1	CBCs	Scissor_pos_VS_Scissor_neg
KWMTBOMO00390	0.0452240018234361	1.27832386640529	0.005	0.02	1	CBCs	Scissor_pos_VS_Scissor_neg
KWMTBOMO11078	0.0303963480613224	1.27830928381583	0.051	0.094	1	CBCs	Scissor_pos_VS_Scissor_neg
KWMTBOMO15619	0.490491216820441	1.27778554798916	0.028	0.037	1	CBCs	Scissor_pos_VS_Scissor_neg
KWMTBOMO13410	0.206688669889834	1.27690179246888	0.009	0.02	1	CBCs	Scissor_pos_VS_Scissor_neg
KWMTBOMO08521	0.110802881016574	1.27684733437058	0.06	0.094	1	CBCs	Scissor_pos_VS_Scissor_neg
KWMTBOMO09445	0.00649793683198839	1.27629666349998	0.193	0.323	1	CBCs	Scissor_pos_VS_Scissor_neg
KWMTBOMO04670	0.0609429818205326	1.27617844446425	0.042	0.074	1	CBCs	Scissor_pos_VS_Scissor_neg
KWMTBOMO00040	0.275107392690994	1.27505939324044	0.007	0.015	1	CBCs	Scissor_pos_VS_Scissor_neg
KWMTBOMO03319	0.00375679634073037	1.27363674505531	0.035	0.084	1	CBCs	Scissor_pos_VS_Scissor_neg
KWMTBOMO13856	0.113037572462063	1.27230977560683	0.042	0.069	1	CBCs	Scissor_pos_VS_Scissor_neg
KWMTBOMO10959	0.0658921486046827	1.27133646637883	0.016	0.037	1	CBCs	Scissor_pos_VS_Scissor_neg
KWMTBOMO09586	0.00457430510559058	1.26949618856069	0.002	0.025	1	CBCs	Scissor_pos_VS_Scissor_neg
KWMTBOMO04324	0.246098656344272	1.26942483701043	0.109	0.149	1	CBCs	Scissor_pos_VS_Scissor_neg
KWMTBOMO10382	0.119742305042822	1.26938077757008	0.046	0.074	1	CBCs	Scissor_pos_VS_Scissor_neg
KWMTBOMO00882	0.0150359615705338	1.26912789773258	0.023	0.057	1	CBCs	Scissor_pos_VS_Scissor_neg
KWMTBOMO09530	0.421622621222148	1.26825328026112	0.132	0.166	1	CBCs	Scissor_pos_VS_Scissor_neg
KWMTBOMO10191	0.66734473649593	1.26818	0.019	0.015	1	CBCs	Scissor_pos_VS_Scissor_neg
KWMTBOMO02302	0.949532282704467	1.26797661451702	0.03	0.03	1	CBCs	Scissor_pos_VS_Scissor_neg
KWMTBOMO16261	0.201534465717109	1.26790418607718	0.142	0.194	1	CBCs	Scissor_pos_VS_Scissor_neg
KWMTBOMO13413	0.715820953008985	1.26780526262368	0.049	0.045	1	CBCs	Scissor_pos_VS_Scissor_neg
KWMTBOMO04752	0.0180741477976518	1.26696309715787	0.084	0.144	1	CBCs	Scissor_pos_VS_Scissor_neg
KWMTBOMO15849	0.226261931139217	1.2657394542465	0.042	0.062	1	CBCs	Scissor_pos_VS_Scissor_neg
KWMTBOMO05390	0.642512447245737	1.26411337153031	0.007	0.01	1	CBCs	Scissor_pos_VS_Scissor_neg
KWMTBOMO11072	0.400353118498909	1.26410906231802	0.139	0.179	1	CBCs	Scissor_pos_VS_Scissor_neg
KWMTBOMO08024	0.270003781557592	1.26313307823452	0.114	0.151	1	CBCs	Scissor_pos_VS_Scissor_neg
KWMTBOMO16398	0.0309081356246823	1.26245207099765	0.371	0.397	1	CBCs	Scissor_pos_VS_Scissor_neg
KWMTBOMO10835	0.104413574353552	1.2622288839242	0.093	0.136	1	CBCs	Scissor_pos_VS_Scissor_neg
KWMTBOMO00833	0.158608419017452	1.26194321232058	0.13	0.181	1	CBCs	Scissor_pos_VS_Scissor_neg
KWMTBOMO11562	0.223295002387661	1.26126323715513	0.005	0.012	1	CBCs	Scissor_pos_VS_Scissor_neg
KWMTBOMO11800	0.432026163762553	1.2611671926361	0.039	0.052	1	CBCs	Scissor_pos_VS_Scissor_neg
KWMTBOMO13814	0.0612653805164779	1.26089120142108	0.021	0.045	1	CBCs	Scissor_pos_VS_Scissor_neg
KWMTBOMO09427	0.26721145580894	1.26073602647694	0.014	0.025	1	CBCs	Scissor_pos_VS_Scissor_neg
KWMTBOMO03214	0.129225021302216	1.25991029195872	0.037	0.02	1	CBCs	Scissor_pos_VS_Scissor_neg
KWMTBOMO00549	0.900802201561894	1.25959224228489	0.023	0.022	1	CBCs	Scissor_pos_VS_Scissor_neg
KWMTBOMO00426	0.268069029477332	1.25936680002265	0.206	0.283	1	CBCs	Scissor_pos_VS_Scissor_neg
KWMTBOMO06187	0.164602038797141	1.25911093961511	0.026	0.012	1	CBCs	Scissor_pos_VS_Scissor_neg
KWMTBOMO03238	0.647737562730228	1.25861093634116	0.007	0.01	1	CBCs	Scissor_pos_VS_Scissor_neg
KWMTBOMO06492	0.0188391070248075	1.25759706142724	0.016	0.045	1	CBCs	Scissor_pos_VS_Scissor_neg
KWMTBOMO06883	0.19365053796112	1.25571421663928	0.023	0.04	1	CBCs	Scissor_pos_VS_Scissor_neg
KWMTBOMO02243	0.892498925549066	1.25496167683075	0.021	0.02	1	CBCs	Scissor_pos_VS_Scissor_neg
KWMTBOMO01023	0.646429642873559	1.25472063959052	0.007	0.01	1	CBCs	Scissor_pos_VS_Scissor_neg
KWMTBOMO12211	0.274401043906844	1.2543469609761	0.007	0.015	1	CBCs	Scissor_pos_VS_Scissor_neg
KWMTBOMO13861	0.292731734324988	1.25411725409076	0.225	0.303	1	CBCs	Scissor_pos_VS_Scissor_neg
KWMTBOMO02251	0.278022121617871	1.25399186665464	0.065	0.089	1	CBCs	Scissor_pos_VS_Scissor_neg
KWMTBOMO14578	0.198516425742392	1.25371385222622	0.084	0.117	1	CBCs	Scissor_pos_VS_Scissor_neg
KWMTBOMO11693	0.0174056458409262	1.2531473782184	0.067	0.122	1	CBCs	Scissor_pos_VS_Scissor_neg
KWMTBOMO03475	0.533248947511326	1.25222839801205	0.278	0.318	1	CBCs	Scissor_pos_VS_Scissor_neg
KWMTBOMO06052	0.456717249130891	1.25157237383702	0.023	0.032	1	CBCs	Scissor_pos_VS_Scissor_neg
KWMTBOMO03478	0.0770506152114502	1.2514709946866	0.005	0.017	1	CBCs	Scissor_pos_VS_Scissor_neg
KWMTBOMO00563	0.349406457189636	1.25116803636956	0.012	0.02	1	CBCs	Scissor_pos_VS_Scissor_neg
KWMTBOMO05647	0.274561852315883	1.25090132777792	0.037	0.055	1	CBCs	Scissor_pos_VS_Scissor_neg
KWMTBOMO10474	0.21867132336355	1.25078764033135	0.104	0.144	1	CBCs	Scissor_pos_VS_Scissor_neg
KWMTBOMO07513	0.749233206888085	1.25036479379063	0.028	0.025	1	CBCs	Scissor_pos_VS_Scissor_neg
KWMTBOMO12894	0.790020202568997	1.2500380386435	0.193	0.208	1	CBCs	Scissor_pos_VS_Scissor_neg
KWMTBOMO10459	7.88224767844649e-05	1.24826383100667	0.044	0.124	1	CBCs	Scissor_pos_VS_Scissor_neg
KWMTBOMO04595	0.112133128001414	1.24818934309056	0.107	0.156	1	CBCs	Scissor_pos_VS_Scissor_neg
KWMTBOMO04312	0.0323892405919841	1.24800540525413	0.053	0.097	1	CBCs	Scissor_pos_VS_Scissor_neg
KWMTBOMO10946	0.769921770987277	1.2479724238339	0.118	0.134	1	CBCs	Scissor_pos_VS_Scissor_neg
KWMTBOMO13150	0.0207545427130442	1.24768897496926	0.39	0.419	1	CBCs	Scissor_pos_VS_Scissor_neg
KWMTBOMO06916	0.906041766359182	1.24684130684249	0.019	0.02	1	CBCs	Scissor_pos_VS_Scissor_neg
KWMTBOMO12739	0.319791000110971	1.2463693194918	0.123	0.161	1	CBCs	Scissor_pos_VS_Scissor_neg
KWMTBOMO07220	0.543161260366791	1.24519934427273	0.128	0.156	1	CBCs	Scissor_pos_VS_Scissor_neg
KWMTBOMO08943	0.221914246424988	1.24399955986406	0.005	0.012	1	CBCs	Scissor_pos_VS_Scissor_neg
KWMTBOMO06397	0.0856992806400897	1.24346625006892	0.009	0.025	1	CBCs	Scissor_pos_VS_Scissor_neg
KWMTBOMO02294	0.223754958809503	1.24267987487313	0.028	0.045	1	CBCs	Scissor_pos_VS_Scissor_neg
KWMTBOMO12879	0.0846723786147268	1.24237796122781	0.044	0.074	1	CBCs	Scissor_pos_VS_Scissor_neg
KWMTBOMO12915	0.17996845142841	1.24220480353029	0.014	0.027	1	CBCs	Scissor_pos_VS_Scissor_neg
KWMTBOMO06749	0.00222586540193352	1.24090917679636	0.014	0.052	1	CBCs	Scissor_pos_VS_Scissor_neg
KWMTBOMO08913	0.0894458873386664	1.24050608274927	0.079	0.122	1	CBCs	Scissor_pos_VS_Scissor_neg
KWMTBOMO08457	1.30725157553379e-05	1.24048329368319	0.021	0.092	0.220664065950103	CBCs	Scissor_pos_VS_Scissor_neg
KWMTBOMO03182	0.418458046184119	1.23939303707122	0.019	0.027	1	CBCs	Scissor_pos_VS_Scissor_neg
KWMTBOMO11600	0.169904359940836	1.23877750088425	0.357	0.392	1	CBCs	Scissor_pos_VS_Scissor_neg
KWMTBOMO06202	0.46447047157494	1.23861708682246	0.153	0.191	1	CBCs	Scissor_pos_VS_Scissor_neg
KWMTBOMO04094	0.471168287133477	1.23853720108696	0.026	0.035	1	CBCs	Scissor_pos_VS_Scissor_neg
KWMTBOMO07899	0.311471284007149	1.23832699026514	0.019	0.03	1	CBCs	Scissor_pos_VS_Scissor_neg
KWMTBOMO03788	0.000613395221284527	1.23812501159575	0.109	0.213	1	CBCs	Scissor_pos_VS_Scissor_neg
KWMTBOMO06449	0.465342522831331	1.23782388004733	0.009	0.015	1	CBCs	Scissor_pos_VS_Scissor_neg
KWMTBOMO03835	0.495294364090237	1.2370037564176	0.012	0.017	1	CBCs	Scissor_pos_VS_Scissor_neg
KWMTBOMO11614	0.604831780432496	1.23667528305777	0.209	0.223	1	CBCs	Scissor_pos_VS_Scissor_neg
KWMTBOMO15788	0.127104072271405	1.23634311164888	0.037	0.062	1	CBCs	Scissor_pos_VS_Scissor_neg
KWMTBOMO09208	0.00694874637249506	1.23587886013005	0.049	0.102	1	CBCs	Scissor_pos_VS_Scissor_neg
KWMTBOMO15951	0.672494131224345	1.23556017235524	0.009	0.012	1	CBCs	Scissor_pos_VS_Scissor_neg
KWMTBOMO06983	0.316596385326886	1.23412581691335	0.009	0.017	1	CBCs	Scissor_pos_VS_Scissor_neg
KWMTBOMO06991	0.568034124595674	1.23336683805867	0.077	0.069	1	CBCs	Scissor_pos_VS_Scissor_neg
KWMTBOMO01832	0.689737540940079	1.23269423927264	0.104	0.122	1	CBCs	Scissor_pos_VS_Scissor_neg
KWMTBOMO10519	0.0754188739644372	1.23261300707875	0.039	0.069	1	CBCs	Scissor_pos_VS_Scissor_neg
KWMTBOMO00888	8.74986455280181e-05	1.23147132629445	0.084	0.191	1	CBCs	Scissor_pos_VS_Scissor_neg
KWMTBOMO16130	0.510696627405977	1.23119765501147	0.137	0.169	1	CBCs	Scissor_pos_VS_Scissor_neg
KWMTBOMO10235	0.0862605439727265	1.2310846645889	0.002	0.012	1	CBCs	Scissor_pos_VS_Scissor_neg
KWMTBOMO10909	0.398146211082355	1.23102325080627	0.016	0.025	1	CBCs	Scissor_pos_VS_Scissor_neg
KWMTBOMO07406	0.557341669213746	1.23017360124391	0.019	0.025	1	CBCs	Scissor_pos_VS_Scissor_neg
KWMTBOMO06452	0.129056167469754	1.23005358519492	0.065	0.042	1	CBCs	Scissor_pos_VS_Scissor_neg
KWMTBOMO16122	0.574200313428104	1.22979236882612	0.079	0.072	1	CBCs	Scissor_pos_VS_Scissor_neg
KWMTBOMO13184	0.857434525634533	1.22846982262657	0.016	0.015	1	CBCs	Scissor_pos_VS_Scissor_neg
KWMTBOMO12589	0.0122408566140216	1.22820211699826	0.016	0.047	1	CBCs	Scissor_pos_VS_Scissor_neg
KWMTBOMO07652	0.0389325101156656	1.22795230545932	0.144	0.223	1	CBCs	Scissor_pos_VS_Scissor_neg
KWMTBOMO09284	0.874322569814137	1.22789459017529	0.111	0.124	1	CBCs	Scissor_pos_VS_Scissor_neg
KWMTBOMO13944	0.239102208626196	1.22753099977972	0.021	0.035	1	CBCs	Scissor_pos_VS_Scissor_neg
KWMTBOMO13963	0.133926918343586	1.22705899388221	0.009	0.022	1	CBCs	Scissor_pos_VS_Scissor_neg
KWMTBOMO02533	0.524376489071075	1.22676326825198	0.014	0.02	1	CBCs	Scissor_pos_VS_Scissor_neg
KWMTBOMO04146	0.42523	1.22653056434233	0.007	0.012	1	CBCs	Scissor_pos_VS_Scissor_neg
KWMTBOMO09551	0.272218555541103	1.22628127232061	0.053	0.074	1	CBCs	Scissor_pos_VS_Scissor_neg
KWMTBOMO05060	0.608855243625557	1.22567084651019	0.104	0.099	1	CBCs	Scissor_pos_VS_Scissor_neg
KWMTBOMO14077	0.00252711384519795	1.22553937032122	0.169	0.298	1	CBCs	Scissor_pos_VS_Scissor_neg
KWMTBOMO13951	0.104503223943937	1.22539154883676	0.012	0.027	1	CBCs	Scissor_pos_VS_Scissor_neg
KWMTBOMO06120	0.00108057985860443	1.22529563147912	0.056	0.127	1	CBCs	Scissor_pos_VS_Scissor_neg
KWMTBOMO08203	0.160175218436833	1.22492759357311	0.012	0.025	1	CBCs	Scissor_pos_VS_Scissor_neg
KWMTBOMO03903	0.129430213005173	1.22421178581712	0.371	0.427	1	CBCs	Scissor_pos_VS_Scissor_neg
KWMTBOMO08301	0.0517102597178971	1.2239152930008	0.03	0.06	1	CBCs	Scissor_pos_VS_Scissor_neg
KWMTBOMO15461	0.181499741259971	1.22365643113307	0.014	0.027	1	CBCs	Scissor_pos_VS_Scissor_neg
KWMTBOMO09535	0.534213134600281	1.22323646003065	0.104	0.129	1	CBCs	Scissor_pos_VS_Scissor_neg
KWMTBOMO14537	0.154162990182099	1.2229158096995	0.035	0.057	1	CBCs	Scissor_pos_VS_Scissor_neg
KWMTBOMO09133	0.845273571254755	1.22280919117686	0.107	0.119	1	CBCs	Scissor_pos_VS_Scissor_neg
KWMTBOMO03855	0.0687515742034667	1.22247284931557	0.03	0.057	1	CBCs	Scissor_pos_VS_Scissor_neg
KWMTBOMO05099	0.0152687075300575	1.22108330569734	0.135	0.218	1	CBCs	Scissor_pos_VS_Scissor_neg
KWMTBOMO00005	0.0184466169483482	1.22030206787293	0.021	0.052	1	CBCs	Scissor_pos_VS_Scissor_neg
KWMTBOMO04870	0.156909937125328	1.2200649901356	0.002	0.01	1	CBCs	Scissor_pos_VS_Scissor_neg
KWMTBOMO12476	0.0669020906019167	1.21972910127813	0.037	0.067	1	CBCs	Scissor_pos_VS_Scissor_neg
KWMTBOMO01137	0.583481376820572	1.21961942053634	0.169	0.208	1	CBCs	Scissor_pos_VS_Scissor_neg
KWMTBOMO10196	0.0913060880389424	1.21893743054682	0.037	0.065	1	CBCs	Scissor_pos_VS_Scissor_neg
KWMTBOMO04909	0.23464510009435	1.21859695719727	0.03	0.047	1	CBCs	Scissor_pos_VS_Scissor_neg
KWMTBOMO08633	0.111222313372308	1.21856592871258	0.179	0.154	1	CBCs	Scissor_pos_VS_Scissor_neg
KWMTBOMO03836	0.00385517364428112	1.21849599422827	0.084	0.159	1	CBCs	Scissor_pos_VS_Scissor_neg
KWMTBOMO15443	0.089625968127738	1.21809228890966	0.028	0.052	1	CBCs	Scissor_pos_VS_Scissor_neg
KWMTBOMO13022	0.650048296342087	1.21795640445387	0.121	0.144	1	CBCs	Scissor_pos_VS_Scissor_neg
KWMTBOMO10413	0.138522062780002	1.21739591573184	0.072	0.107	1	CBCs	Scissor_pos_VS_Scissor_neg
KWMTBOMO13440	0.117605998332403	1.21739319657779	0.028	0.05	1	CBCs	Scissor_pos_VS_Scissor_neg
KWMTBOMO08065	0.463399737091808	1.21619239335864	0.044	0.057	1	CBCs	Scissor_pos_VS_Scissor_neg
KWMTBOMO02114	0.294616761316921	1.21597778837299	0.121	0.161	1	CBCs	Scissor_pos_VS_Scissor_neg
KWMTBOMO04761	0.23442940947599	1.21436271755048	0.042	0.062	1	CBCs	Scissor_pos_VS_Scissor_neg
KWMTBOMO08538	0.0845632614063234	1.21122509079328	0.07	0.109	1	CBCs	Scissor_pos_VS_Scissor_neg
KWMTBOMO00930	0.841932680062462	1.21076715952553	0.014	0.012	1	CBCs	Scissor_pos_VS_Scissor_neg
KWMTBOMO06333	0.335327068576667	1.21068752531421	0.077	0.102	1	CBCs	Scissor_pos_VS_Scissor_neg
KWMTBOMO15909	0.563498612893033	1.21067590003091	0.019	0.025	1	CBCs	Scissor_pos_VS_Scissor_neg
KWMTBOMO06836	0.239851471490797	1.21044110167748	0.313	0.36	1	CBCs	Scissor_pos_VS_Scissor_neg
KWMTBOMO06183	0.43534577207317	1.20876675690711	0.021	0.03	1	CBCs	Scissor_pos_VS_Scissor_neg
KWMTBOMO07055	0.00363916805473556	1.2081721636528	0.1	0.184	1	CBCs	Scissor_pos_VS_Scissor_neg
KWMTBOMO09132	0.0438211676516168	1.20814676096995	0.016	0.04	1	CBCs	Scissor_pos_VS_Scissor_neg
KWMTBOMO02544	0.922791501819834	1.20799360001957	0.014	0.015	1	CBCs	Scissor_pos_VS_Scissor_neg
KWMTBOMO03792	0.0050666094548573	1.2078509896332	0.053	0.112	1	CBCs	Scissor_pos_VS_Scissor_neg
KWMTBOMO16484	4.23336522433031e-12	1.20679318252378	0.759	0.754	7.14592049866956e-08	CBCs	Scissor_pos_VS_Scissor_neg
KWMTBOMO03602	0.0120580006463472	1.20672956727924	0.285	0.248	1	CBCs	Scissor_pos_VS_Scissor_neg
KWMTBOMO00786	0.255438477992389	1.20477642085875	0.218	0.216	1	CBCs	Scissor_pos_VS_Scissor_neg
KWMTBOMO14974	0.887607354104496	1.20419814428718	0.137	0.156	1	CBCs	Scissor_pos_VS_Scissor_neg
KWMTBOMO11117	0.453045674365607	1.20397699280289	0.023	0.032	1	CBCs	Scissor_pos_VS_Scissor_neg
KWMTBOMO01763	0.642690514629406	1.20312477825143	0.07	0.082	1	CBCs	Scissor_pos_VS_Scissor_neg
KWMTBOMO02824	0.00963107659261423	1.20293410324294	0.032	0.074	1	CBCs	Scissor_pos_VS_Scissor_neg
KWMTBOMO07538	0.667580183651299	1.20246619324531	0.086	0.082	1	CBCs	Scissor_pos_VS_Scissor_neg
KWMTBOMO02392	0.0144154795324217	1.20184524450367	0.014	0.042	1	CBCs	Scissor_pos_VS_Scissor_neg
KWMTBOMO12374	0.264706556397743	1.20142321154825	0.32	0.345	1	CBCs	Scissor_pos_VS_Scissor_neg
KWMTBOMO08599	0.712415324681016	1.20062083012327	0.016	0.02	1	CBCs	Scissor_pos_VS_Scissor_neg
KWMTBOMO14689	0.645122814731926	1.20018802183145	0.007	0.01	1	CBCs	Scissor_pos_VS_Scissor_neg
KWMTBOMO15285	0.84175065694965	1.19988619784356	0.049	0.047	1	CBCs	Scissor_pos_VS_Scissor_neg
KWMTBOMO13583	0.0027710159479973	1.19826420793006	0.009	0.042	1	CBCs	Scissor_pos_VS_Scissor_neg
KWMTBOMO08766	0.19036939506263	1.19801414391118	0.06	0.087	1	CBCs	Scissor_pos_VS_Scissor_neg
KWMTBOMO10214	0.00981000309316007	1.19742254240551	0.107	0.186	1	CBCs	Scissor_pos_VS_Scissor_neg
KWMTBOMO01482	0.725078019545777	1.19718420241067	0.304	0.39	1	CBCs	Scissor_pos_VS_Scissor_neg
KWMTBOMO14752	0.59503839616073	1.19690726090694	0.121	0.117	1	CBCs	Scissor_pos_VS_Scissor_neg
KWMTBOMO05497	0.156909937125328	1.19491219234492	0.002	0.01	1	CBCs	Scissor_pos_VS_Scissor_neg
KWMTBOMO15167	0.0596846886437115	1.19458108537094	0.056	0.094	1	CBCs	Scissor_pos_VS_Scissor_neg
KWMTBOMO04937	0.0656188756820816	1.19449953974617	0.16	0.238	1	CBCs	Scissor_pos_VS_Scissor_neg
KWMTBOMO15607	0.465342522831331	1.19448041143159	0.009	0.015	1	CBCs	Scissor_pos_VS_Scissor_neg
KWMTBOMO04438	0.508934171571678	1.19369463623748	0.123	0.117	1	CBCs	Scissor_pos_VS_Scissor_neg
KWMTBOMO03613	0.138579745257246	1.19328469808881	0.042	0.067	1	CBCs	Scissor_pos_VS_Scissor_neg
KWMTBOMO02893	0.524362633193615	1.19257120605859	0.063	0.077	1	CBCs	Scissor_pos_VS_Scissor_neg
KWMTBOMO16039	0.0145784940097311	1.19099965121508	0.014	0.042	1	CBCs	Scissor_pos_VS_Scissor_neg
KWMTBOMO10492	0.243487090146047	1.19027779911203	0.123	0.164	1	CBCs	Scissor_pos_VS_Scissor_neg
KWMTBOMO05908	0.69667669225823	1.19004058988988	0.021	0.017	1	CBCs	Scissor_pos_VS_Scissor_neg
KWMTBOMO11569	0.614091547340483	1.1896624933099	0.056	0.067	1	CBCs	Scissor_pos_VS_Scissor_neg
KWMTBOMO01095	0.206607610515661	1.18957162080495	0.32	0.345	1	CBCs	Scissor_pos_VS_Scissor_neg
KWMTBOMO12128	0.00892615229103645	1.18863748162663	0.058	0.114	1	CBCs	Scissor_pos_VS_Scissor_neg
KWMTBOMO16236	0.186462212586614	1.18849448441435	0.044	0.067	1	CBCs	Scissor_pos_VS_Scissor_neg
KWMTBOMO05284	0.701413877549925	1.18837789284138	0.014	0.017	1	CBCs	Scissor_pos_VS_Scissor_neg
KWMTBOMO14982	0.305285571371202	1.1874683294615	0.019	0.03	1	CBCs	Scissor_pos_VS_Scissor_neg
KWMTBOMO14164	0.0850156020524985	1.18721874391422	0.1	0.149	1	CBCs	Scissor_pos_VS_Scissor_neg
KWMTBOMO05858	0.0529833684773238	1.18706690026246	0.03	0.06	1	CBCs	Scissor_pos_VS_Scissor_neg
KWMTBOMO01994	2.93392203175768e-05	1.18506281011893	0.067	0.169	0.495246038960697	CBCs	Scissor_pos_VS_Scissor_neg
KWMTBOMO03610	0.945237038762538	1.18492483699005	0.077	0.079	1	CBCs	Scissor_pos_VS_Scissor_neg
KWMTBOMO01334	0.820688363712815	1.18489847477368	0.063	0.069	1	CBCs	Scissor_pos_VS_Scissor_neg
KWMTBOMO06371	0.121715	1.1826180869947	0.028	0.05	1	CBCs	Scissor_pos_VS_Scissor_neg
KWMTBOMO11101	0.769401225476533	1.18232509587274	0.118	0.122	1	CBCs	Scissor_pos_VS_Scissor_neg
KWMTBOMO07049	0.000168374567221611	1.18189829395859	0.079	0.176	1	CBCs	Scissor_pos_VS_Scissor_neg
KWMTBOMO05857	0.0285183544476929	1.18186746227747	0.016	0.042	1	CBCs	Scissor_pos_VS_Scissor_neg
KWMTBOMO08312	0.00476599210568774	1.18122088519659	0.028	0.072	1	CBCs	Scissor_pos_VS_Scissor_neg
KWMTBOMO05991	0.405508885461256	1.18039740191822	0.274	0.298	1	CBCs	Scissor_pos_VS_Scissor_neg
KWMTBOMO07140	0.22367596071778	1.17982793429301	0.227	0.32	1	CBCs	Scissor_pos_VS_Scissor_neg
KWMTBOMO14833	0.930078621655886	1.17982275349753	0.009	0.01	1	CBCs	Scissor_pos_VS_Scissor_neg
KWMTBOMO01350	0.616908920575304	1.17918969809817	0.058	0.052	1	CBCs	Scissor_pos_VS_Scissor_neg
KWMTBOMO08239	0.0102100266029983	1.17881807591401	0.049	0.099	1	CBCs	Scissor_pos_VS_Scissor_neg
KWMTBOMO00688	0.00103482848263975	1.17869768661692	0.037	0.097	1	CBCs	Scissor_pos_VS_Scissor_neg
KWMTBOMO09184	0.817446941256027	1.17853622548098	0.146	0.156	1	CBCs	Scissor_pos_VS_Scissor_neg
KWMTBOMO08386	0.378613883050649	1.17797334961805	0.102	0.132	1	CBCs	Scissor_pos_VS_Scissor_neg
KWMTBOMO10937	0.0302223732553041	1.17551121628245	0.039	0.077	1	CBCs	Scissor_pos_VS_Scissor_neg
KWMTBOMO12786	0.107095246101661	1.17496765258037	0.007	0.02	1	CBCs	Scissor_pos_VS_Scissor_neg
KWMTBOMO10247	0.00546419701678495	1.1742226419329	0.026	0.067	1	CBCs	Scissor_pos_VS_Scissor_neg
KWMTBOMO01830	0.058343225412221	1.17344748425043	0.088	0.139	1	CBCs	Scissor_pos_VS_Scissor_neg
KWMTBOMO00408	0.0700323283496191	1.17342311127634	0.023	0.047	1	CBCs	Scissor_pos_VS_Scissor_neg
KWMTBOMO01502	0.319858815934489	1.1731854982052	0.032	0.047	1	CBCs	Scissor_pos_VS_Scissor_neg
KWMTBOMO00393	0.134816849765105	1.17268083708963	0.067	0.102	1	CBCs	Scissor_pos_VS_Scissor_neg
KWMTBOMO14579	0.0639556883157033	1.17254887592008	0.028	0.055	1	CBCs	Scissor_pos_VS_Scissor_neg
KWMTBOMO10781	0.630202621972333	1.17140788206339	0.035	0.042	1	CBCs	Scissor_pos_VS_Scissor_neg
KWMTBOMO12744	0.0272954525584991	1.17125617016077	0.051	0.094	1	CBCs	Scissor_pos_VS_Scissor_neg
KWMTBOMO15587	0.0195014048433772	1.17019598967405	0.084	0.144	1	CBCs	Scissor_pos_VS_Scissor_neg
KWMTBOMO11960	0.0873958773354321	1.17006334036851	0.028	0.052	1	CBCs	Scissor_pos_VS_Scissor_neg
KWMTBOMO05499	0.00600650867457721	1.16940480496331	0.111	0.196	1	CBCs	Scissor_pos_VS_Scissor_neg
KWMTBOMO01130	0.571598973710172	1.16853312296703	0.049	0.06	1	CBCs	Scissor_pos_VS_Scissor_neg
KWMTBOMO05262	0.0260361340878898	1.16831084666253	0.07	0.122	1	CBCs	Scissor_pos_VS_Scissor_neg
KWMTBOMO05195	0.270041781754604	1.16762047737056	0.037	0.055	1	CBCs	Scissor_pos_VS_Scissor_neg
KWMTBOMO02518	0.124718768222469	1.16679268688447	0.014	0.03	1	CBCs	Scissor_pos_VS_Scissor_neg
KWMTBOMO00024	0.0213991111282582	1.16526254634032	0.053	0.099	1	CBCs	Scissor_pos_VS_Scissor_neg
KWMTBOMO14142	0.323011659036116	1.16518086922312	0.1	0.132	1	CBCs	Scissor_pos_VS_Scissor_neg
KWMTBOMO16148	0.23896656132982	1.16491046092619	0.012	0.022	1	CBCs	Scissor_pos_VS_Scissor_neg
KWMTBOMO07107	0.0322968139723188	1.16462800171989	0.193	0.293	1	CBCs	Scissor_pos_VS_Scissor_neg
KWMTBOMO06867	0.902621226983592	1.16433287818103	0.378	0.514	1	CBCs	Scissor_pos_VS_Scissor_neg
KWMTBOMO11159	0.69220577334203	1.16379832848135	0.021	0.017	1	CBCs	Scissor_pos_VS_Scissor_neg
KWMTBOMO04527	0.0484292846268735	1.1637844822406	0.023	0.05	1	CBCs	Scissor_pos_VS_Scissor_neg
KWMTBOMO06071	0.000320174966472424	1.1622749120421	0.065	0.149	1	CBCs	Scissor_pos_VS_Scissor_neg
KWMTBOMO13282	0.61281384392826	1.16206306136119	0.03	0.037	1	CBCs	Scissor_pos_VS_Scissor_neg
KWMTBOMO04389	0.000538624892127955	1.16181453118302	0.005	0.04	1	CBCs	Scissor_pos_VS_Scissor_neg
KWMTBOMO01166	0.135952741385055	1.1614230693063	0.023	0.01	1	CBCs	Scissor_pos_VS_Scissor_neg
KWMTBOMO11937	0.156909937125328	1.16063813247131	0.002	0.01	1	CBCs	Scissor_pos_VS_Scissor_neg
KWMTBOMO12970	0.0958329588168971	1.16047974363634	0.093	0.139	1	CBCs	Scissor_pos_VS_Scissor_neg
KWMTBOMO14017	0.816430616420953	1.15990513486118	0.042	0.04	1	CBCs	Scissor_pos_VS_Scissor_neg
KWMTBOMO08793	0.293561338062665	1.15865861960254	0.012	0.005	1	CBCs	Scissor_pos_VS_Scissor_neg
KWMTBOMO04546	0.458994896761596	1.15846380998634	0.204	0.258	1	CBCs	Scissor_pos_VS_Scissor_neg
KWMTBOMO02836	0.19978471741455	1.15807097634909	0.158	0.213	1	CBCs	Scissor_pos_VS_Scissor_neg
KWMTBOMO06875	0.00200538349017539	1.15748446356353	0.016	0.057	1	CBCs	Scissor_pos_VS_Scissor_neg
KWMTBOMO08792	0.172928201658389	1.1565367753643	0.153	0.213	1	CBCs	Scissor_pos_VS_Scissor_neg
KWMTBOMO06573	0.320608467998866	1.15637424955718	0.067	0.089	1	CBCs	Scissor_pos_VS_Scissor_neg
KWMTBOMO16366	0.19112578485837	1.15633898743766	0.07	0.099	1	CBCs	Scissor_pos_VS_Scissor_neg
KWMTBOMO12092	0.155130758422247	1.15421248473332	0.058	0.087	1	CBCs	Scissor_pos_VS_Scissor_neg
KWMTBOMO15127	0.52509793392424	1.15409947511518	0.06	0.074	1	CBCs	Scissor_pos_VS_Scissor_neg
KWMTBOMO08005	0.917638104005185	1.15331481010348	0.016	0.017	1	CBCs	Scissor_pos_VS_Scissor_neg
KWMTBOMO06075	0.675384783517969	1.15328815622636	0.137	0.161	1	CBCs	Scissor_pos_VS_Scissor_neg
KWMTBOMO13972	0.107095246101661	1.15303412510552	0.007	0.02	1	CBCs	Scissor_pos_VS_Scissor_neg
KWMTBOMO12348	0.185654398370644	1.15272871338579	0.042	0.065	1	CBCs	Scissor_pos_VS_Scissor_neg
KWMTBOMO02626	0.0279676194134359	1.15242756496571	0.144	0.231	1	CBCs	Scissor_pos_VS_Scissor_neg
KWMTBOMO15136	0.5429415452823	1.1518629138373	0.22	0.233	1	CBCs	Scissor_pos_VS_Scissor_neg
KWMTBOMO00727	0.0157209575807143	1.15110865133222	0.023	0.057	1	CBCs	Scissor_pos_VS_Scissor_neg
KWMTBOMO13401	0.0529875870362519	1.15091464971944	0.088	0.139	1	CBCs	Scissor_pos_VS_Scissor_neg
KWMTBOMO12946	0.736083747863055	1.14973713005494	0.023	0.027	1	CBCs	Scissor_pos_VS_Scissor_neg
KWMTBOMO03756	0.749752888689059	1.14951486279976	0.03	0.035	1	CBCs	Scissor_pos_VS_Scissor_neg
KWMTBOMO05484	0.902689100973899	1.14940692983452	0.026	0.027	1	CBCs	Scissor_pos_VS_Scissor_neg
KWMTBOMO04175	0.156909937125328	1.14930877746932	0.002	0.01	1	CBCs	Scissor_pos_VS_Scissor_neg
KWMTBOMO14656	0.918085053432931	1.14899123509492	0.021	0.022	1	CBCs	Scissor_pos_VS_Scissor_neg
KWMTBOMO02733	0.553320321691551	1.14899002757067	0.102	0.124	1	CBCs	Scissor_pos_VS_Scissor_neg
KWMTBOMO03183	0.0853844393468883	1.14879426263222	0.088	0.134	1	CBCs	Scissor_pos_VS_Scissor_neg
KWMTBOMO16167	0.682755815482933	1.14710316776037	0.074	0.069	1	CBCs	Scissor_pos_VS_Scissor_neg
KWMTBOMO16135	0.000217076896081033	1.14683145384931	0.406	0.36	1	CBCs	Scissor_pos_VS_Scissor_neg
KWMTBOMO16037	0.143197280409725	1.14656968140158	0.035	0.057	1	CBCs	Scissor_pos_VS_Scissor_neg
KWMTBOMO08368	0.0893671982119576	1.14641746256965	0.021	0.042	1	CBCs	Scissor_pos_VS_Scissor_neg
KWMTBOMO06914	0.0428944326239978	1.14633840956775	0.063	0.107	1	CBCs	Scissor_pos_VS_Scissor_neg
KWMTBOMO13931	0.0814856334145595	1.14529969767865	0.058	0.094	1	CBCs	Scissor_pos_VS_Scissor_neg
KWMTBOMO08632	0.712445756549103	1.14508876733724	0.067	0.077	1	CBCs	Scissor_pos_VS_Scissor_neg
KWMTBOMO07327	0.691235900027602	1.14448	0.255	0.285	1	CBCs	Scissor_pos_VS_Scissor_neg
KWMTBOMO07621	0.202281901689614	1.14344117195455	0.06	0.087	1	CBCs	Scissor_pos_VS_Scissor_neg
KWMTBOMO04588	0.074811889951523	1.14277294970496	0.13	0.196	1	CBCs	Scissor_pos_VS_Scissor_neg
KWMTBOMO14972	0.0888249867843702	1.1425897476128	0.107	0.156	1	CBCs	Scissor_pos_VS_Scissor_neg
KWMTBOMO09385	0.00247780404418189	1.14166323401305	0.053	0.117	1	CBCs	Scissor_pos_VS_Scissor_neg
KWMTBOMO06560	0.173037914822472	1.1413783279605	0.007	0.017	1	CBCs	Scissor_pos_VS_Scissor_neg
KWMTBOMO00712	0.237142489443252	1.14078203210175	0.306	0.318	1	CBCs	Scissor_pos_VS_Scissor_neg
KWMTBOMO04000	0.471710420859803	1.13991392507583	0.283	0.318	1	CBCs	Scissor_pos_VS_Scissor_neg
KWMTBOMO03405	0.86587713573738	1.13933527892426	0.058	0.057	1	CBCs	Scissor_pos_VS_Scissor_neg
KWMTBOMO03539	0.294398769414348	1.13859420692726	0.012	0.005	1	CBCs	Scissor_pos_VS_Scissor_neg
KWMTBOMO10097	0.0396068145563786	1.13824367904908	0.007	0.025	1	CBCs	Scissor_pos_VS_Scissor_neg
KWMTBOMO00979	0.155236184377696	1.13796815591028	0.037	0.06	1	CBCs	Scissor_pos_VS_Scissor_neg
KWMTBOMO10152	0.0431886186096073	1.13763300084636	0.016	0.04	1	CBCs	Scissor_pos_VS_Scissor_neg
KWMTBOMO14210	0.566581352200935	1.13695033675365	0.021	0.027	1	CBCs	Scissor_pos_VS_Scissor_neg
KWMTBOMO00068	0.309400260650476	1.13686133480407	0.019	0.03	1	CBCs	Scissor_pos_VS_Scissor_neg
KWMTBOMO12053	0.37323703715184	1.13671401847033	0.213	0.273	1	CBCs	Scissor_pos_VS_Scissor_neg
KWMTBOMO11320	0.0035220056874825	1.13377416444622	0.049	0.107	1	CBCs	Scissor_pos_VS_Scissor_neg
KWMTBOMO15913	0.0858107150892079	1.13377322557853	0.132	0.194	1	CBCs	Scissor_pos_VS_Scissor_neg
KWMTBOMO09043	0.356646424003451	1.13207624032018	0.244	0.328	1	CBCs	Scissor_pos_VS_Scissor_neg
KWMTBOMO08354	0.270840575102873	1.13162794577919	0.167	0.218	1	CBCs	Scissor_pos_VS_Scissor_neg
KWMTBOMO16045	0.275107392690994	1.12966313482909	0.007	0.015	1	CBCs	Scissor_pos_VS_Scissor_neg
KWMTBOMO15729	0.0125899425722705	1.12944648811861	0.009	0.035	1	CBCs	Scissor_pos_VS_Scissor_neg
KWMTBOMO06542	0.0585793002879369	1.12875882110642	0.056	0.094	1	CBCs	Scissor_pos_VS_Scissor_neg
KWMTBOMO07440	0.000918503729164957	1.12874459943405	0.012	0.052	1	CBCs	Scissor_pos_VS_Scissor_neg
KWMTBOMO04841	0.800478790662476	1.12817544292354	0.051	0.057	1	CBCs	Scissor_pos_VS_Scissor_neg
KWMTBOMO02581	0.823416119793159	1.12628316535445	0.336	0.424	1	CBCs	Scissor_pos_VS_Scissor_neg
KWMTBOMO13524	0.159863693631755	1.12558867489528	0.019	0.035	1	CBCs	Scissor_pos_VS_Scissor_neg
KWMTBOMO05845	0.0165554931768257	1.1255762820446	0.093	0.159	1	CBCs	Scissor_pos_VS_Scissor_neg
KWMTBOMO12357	0.047924180435028	1.1254266416958	0.023	0.05	1	CBCs	Scissor_pos_VS_Scissor_neg
KWMTBOMO01910	0.570255171283589	1.12525161884055	0.162	0.201	1	CBCs	Scissor_pos_VS_Scissor_neg
KWMTBOMO09924	0.792775067334739	1.12450100591447	0.053	0.06	1	CBCs	Scissor_pos_VS_Scissor_neg
KWMTBOMO07777	0.0109676409733175	1.12426517528921	0.012	0.04	1	CBCs	Scissor_pos_VS_Scissor_neg
KWMTBOMO15495	0.534357860821964	1.12369062064626	0.095	0.114	1	CBCs	Scissor_pos_VS_Scissor_neg
KWMTBOMO12556	0.00137477182821404	1.1233477769799	0.028	0.079	1	CBCs	Scissor_pos_VS_Scissor_neg
KWMTBOMO02823	0.027410687722419	1.12333599902926	0.037	0.074	1	CBCs	Scissor_pos_VS_Scissor_neg
KWMTBOMO04020	0.0775895019219589	1.12299896144449	0.005	0.017	1	CBCs	Scissor_pos_VS_Scissor_neg
KWMTBOMO04262	0.054779229973184	1.12247039839201	0.014	0.035	1	CBCs	Scissor_pos_VS_Scissor_neg
KWMTBOMO13637	0.277873205095216	1.12215142732656	0.077	0.104	1	CBCs	Scissor_pos_VS_Scissor_neg
KWMTBOMO10096	0.00461774770877591	1.12213771113836	0.086	0.159	1	CBCs	Scissor_pos_VS_Scissor_neg
KWMTBOMO07678	0.528348918768835	1.12211098558887	0.058	0.072	1	CBCs	Scissor_pos_VS_Scissor_neg
KWMTBOMO02277	0.788514609233484	1.12171356585202	0.035	0.032	1	CBCs	Scissor_pos_VS_Scissor_neg
KWMTBOMO12757	0.156909937125328	1.12170030738164	0.002	0.01	1	CBCs	Scissor_pos_VS_Scissor_neg
KWMTBOMO16446	0.0862605439727265	1.12164671225619	0.002	0.012	1	CBCs	Scissor_pos_VS_Scissor_neg
KWMTBOMO00913	0.259373556674317	1.1215890119021	0.06	0.084	1	CBCs	Scissor_pos_VS_Scissor_neg
KWMTBOMO04004	0.0206118205973902	1.12123518351971	0.051	0.097	1	CBCs	Scissor_pos_VS_Scissor_neg
KWMTBOMO12616	0.181499741259971	1.12105368160023	0.014	0.027	1	CBCs	Scissor_pos_VS_Scissor_neg
KWMTBOMO15221	0.0323013846471738	1.12087865586621	0.093	0.151	1	CBCs	Scissor_pos_VS_Scissor_neg
KWMTBOMO09469	0.379220869208565	1.12002402870357	0.079	0.102	1	CBCs	Scissor_pos_VS_Scissor_neg
KWMTBOMO02274	0.822247542276652	1.11985647929684	0.139	0.146	1	CBCs	Scissor_pos_VS_Scissor_neg
KWMTBOMO05000	3.00917090703513e-15	1.11921885005092	0.782	0.799	5.07948049107529e-11	CBCs	Scissor_pos_VS_Scissor_neg
KWMTBOMO11395	0.0705112680735917	1.11918154808987	0.03	0.057	1	CBCs	Scissor_pos_VS_Scissor_neg
KWMTBOMO13730	0.00427543109495967	1.11894069835236	0.074	0.144	1	CBCs	Scissor_pos_VS_Scissor_neg
KWMTBOMO04513	0.523011970137953	1.11866170308426	0.109	0.102	1	CBCs	Scissor_pos_VS_Scissor_neg
KWMTBOMO15068	0.586140921832108	1.11684351392017	0.144	0.174	1	CBCs	Scissor_pos_VS_Scissor_neg
KWMTBOMO06630	0.938150144441891	1.1162997393589	0.074	0.079	1	CBCs	Scissor_pos_VS_Scissor_neg
KWMTBOMO11403	0.176442003385035	1.1149279225153	0.021	0.037	1	CBCs	Scissor_pos_VS_Scissor_neg
KWMTBOMO14146	0.000577127838276088	1.11456352590291	0.067	0.149	1	CBCs	Scissor_pos_VS_Scissor_neg
KWMTBOMO14858	0.00386737378927535	1.11433395258662	0.42	0.429	1	CBCs	Scissor_pos_VS_Scissor_neg
KWMTBOMO06081	0.504369322873094	1.11409730775847	0.072	0.089	1	CBCs	Scissor_pos_VS_Scissor_neg
KWMTBOMO09204	0.0727877183989358	1.11302483981534	0.063	0.102	1	CBCs	Scissor_pos_VS_Scissor_neg
KWMTBOMO08707	0.631029199513834	1.11294377609579	0.165	0.201	1	CBCs	Scissor_pos_VS_Scissor_neg
KWMTBOMO05480	0.0122632168938112	1.11153724126687	0.195	0.31	1	CBCs	Scissor_pos_VS_Scissor_neg
KWMTBOMO14519	0.223295002387661	1.1095881708588	0.005	0.012	1	CBCs	Scissor_pos_VS_Scissor_neg
KWMTBOMO11698	0.348027380131754	1.10950744956047	0.012	0.02	1	CBCs	Scissor_pos_VS_Scissor_neg
KWMTBOMO11000	0.238451373658584	1.1092532415949	0.012	0.022	1	CBCs	Scissor_pos_VS_Scissor_neg
KWMTBOMO12087	0.310828677677889	1.10898213362611	0.032	0.047	1	CBCs	Scissor_pos_VS_Scissor_neg
KWMTBOMO08695	5.8479802072985e-05	1.10880964863749	0.074	0.176	0.987139058991986	CBCs	Scissor_pos_VS_Scissor_neg
KWMTBOMO04493	0.469081132075353	1.1087905133633	0.009	0.015	1	CBCs	Scissor_pos_VS_Scissor_neg
KWMTBOMO15204	0.243050755416837	1.10770406996313	0.044	0.065	1	CBCs	Scissor_pos_VS_Scissor_neg
KWMTBOMO02121	0.53749736441042	1.10726699358749	0.097	0.119	1	CBCs	Scissor_pos_VS_Scissor_neg
KWMTBOMO01062	0.563316994937386	1.10648147217176	0.084	0.077	1	CBCs	Scissor_pos_VS_Scissor_neg
KWMTBOMO07686	0.822906348415531	1.10626679621046	0.232	0.263	1	CBCs	Scissor_pos_VS_Scissor_neg
KWMTBOMO07098	0.0151602375575985	1.10318696329459	0.005	0.025	1	CBCs	Scissor_pos_VS_Scissor_neg
KWMTBOMO15316	0.18696980379181	1.10286285469743	0.014	0.005	1	CBCs	Scissor_pos_VS_Scissor_neg
KWMTBOMO13360	0.0412298540461299	1.10275862494853	0.039	0.074	1	CBCs	Scissor_pos_VS_Scissor_neg
KWMTBOMO12960	0.176777061819867	1.10220272316028	0.03	0.05	1	CBCs	Scissor_pos_VS_Scissor_neg
KWMTBOMO09656	0.350543659894068	1.10049162425484	0.058	0.077	1	CBCs	Scissor_pos_VS_Scissor_neg
KWMTBOMO02636	0.286122149545084	1.10030905412432	0.323	0.335	1	CBCs	Scissor_pos_VS_Scissor_neg
KWMTBOMO00617	0.00070529229352455	1.10024513648857	0.065	0.144	1	CBCs	Scissor_pos_VS_Scissor_neg
KWMTBOMO00641	0.208196639628593	1.09923435587415	0.009	0.02	1	CBCs	Scissor_pos_VS_Scissor_neg
KWMTBOMO01057	0.598854097276302	1.09785126228154	0.084	0.077	1	CBCs	Scissor_pos_VS_Scissor_neg
KWMTBOMO01171	0.0169568244178909	1.09752045921391	0.107	0.176	1	CBCs	Scissor_pos_VS_Scissor_neg
KWMTBOMO04667	0.355978575326696	1.09669315741032	0.109	0.139	1	CBCs	Scissor_pos_VS_Scissor_neg
KWMTBOMO05322	0.273695934935116	1.09553184285514	0.007	0.015	1	CBCs	Scissor_pos_VS_Scissor_neg
KWMTBOMO08915	0.151895996399662	1.09513376808756	0.026	0.045	1	CBCs	Scissor_pos_VS_Scissor_neg
KWMTBOMO09269	0.010598297135853	1.09506756827907	0.09	0.047	1	CBCs	Scissor_pos_VS_Scissor_neg
KWMTBOMO00169	0.0485930521266379	1.09422692291144	0.03	0.06	1	CBCs	Scissor_pos_VS_Scissor_neg
KWMTBOMO09559	0.579436837182341	1.09331021539743	0.051	0.062	1	CBCs	Scissor_pos_VS_Scissor_neg
KWMTBOMO12054	0.186214126711959	1.09277764368015	0.09	0.127	1	CBCs	Scissor_pos_VS_Scissor_neg
KWMTBOMO08566	0.00308556709047556	1.09212511501839	0.016	0.055	1	CBCs	Scissor_pos_VS_Scissor_neg
KWMTBOMO07884	0.850781257392624	1.09204065225357	0.074	0.082	1	CBCs	Scissor_pos_VS_Scissor_neg
KWMTBOMO10423	0.0934504902002982	1.09199011371132	0.109	0.161	1	CBCs	Scissor_pos_VS_Scissor_neg
KWMTBOMO15207	0.0598503029770388	1.0918040946718	0.021	0.045	1	CBCs	Scissor_pos_VS_Scissor_neg
KWMTBOMO10174	4.4226755362249e-24	1.09102828301156	0.789	0.864	7.46547630514764e-20	CBCs	Scissor_pos_VS_Scissor_neg
KWMTBOMO13863	0.195562364462265	1.09084535810864	0.079	0.112	1	CBCs	Scissor_pos_VS_Scissor_neg
KWMTBOMO12198	7.38755256722797e-06	1.09077852079669	0.032	0.117	0.124701887334808	CBCs	Scissor_pos_VS_Scissor_neg
KWMTBOMO13777	0.714094714422917	1.0902007761098	0.304	0.36	1	CBCs	Scissor_pos_VS_Scissor_neg
KWMTBOMO01794	0.368800917330229	1.09005035450346	0.367	0.429	1	CBCs	Scissor_pos_VS_Scissor_neg
KWMTBOMO01563	0.00149007647372188	1.08949056164376	0.065	0.139	1	CBCs	Scissor_pos_VS_Scissor_neg
KWMTBOMO02691	0.213551111734688	1.08757231639668	0.16	0.213	1	CBCs	Scissor_pos_VS_Scissor_neg
KWMTBOMO14840	0.0647090145939978	1.08588228551399	0.225	0.333	1	CBCs	Scissor_pos_VS_Scissor_neg
KWMTBOMO13955	0.0174430792365457	1.08585696572322	0.042	0.084	1	CBCs	Scissor_pos_VS_Scissor_neg
KWMTBOMO07912	0.097791443649702	1.08571597343087	0.151	0.218	1	CBCs	Scissor_pos_VS_Scissor_neg
KWMTBOMO09365	0.593327667151763	1.08553361685679	0.142	0.171	1	CBCs	Scissor_pos_VS_Scissor_neg
KWMTBOMO11052	0.533027368738249	1.08500064784044	0.411	0.511	1	CBCs	Scissor_pos_VS_Scissor_neg
KWMTBOMO10998	0.148454780409239	1.08426250109006	0.146	0.206	1	CBCs	Scissor_pos_VS_Scissor_neg
KWMTBOMO09500	0.0516250617907816	1.08268951143809	0.053	0.092	1	CBCs	Scissor_pos_VS_Scissor_neg
KWMTBOMO02433	0.730201736171216	1.08257733317408	0.132	0.132	1	CBCs	Scissor_pos_VS_Scissor_neg
KWMTBOMO12707	0.134177048443368	1.08189218362035	0.07	0.104	1	CBCs	Scissor_pos_VS_Scissor_neg
KWMTBOMO06570	0.104749798001801	1.0817935506082	0.181	0.258	1	CBCs	Scissor_pos_VS_Scissor_neg
KWMTBOMO12304	0.187129384837601	1.08127555036244	0.151	0.206	1	CBCs	Scissor_pos_VS_Scissor_neg
KWMTBOMO02327	0.0202905312150043	1.0810615927927	0.009	0.032	1	CBCs	Scissor_pos_VS_Scissor_neg
KWMTBOMO07168	0.00379946274914145	1.08092473932765	0.03	0.077	1	CBCs	Scissor_pos_VS_Scissor_neg
KWMTBOMO02834	0.914174178262879	1.08037882502381	0.381	0.496	1	CBCs	Scissor_pos_VS_Scissor_neg
KWMTBOMO11696	0.777525666399842	1.07936552264893	0.121	0.124	1	CBCs	Scissor_pos_VS_Scissor_neg
KWMTBOMO15754	0.419746129273451	1.07853537397317	0.116	0.146	1	CBCs	Scissor_pos_VS_Scissor_neg
KWMTBOMO00803	0.0597230147992729	1.07626354641772	0.021	0.045	1	CBCs	Scissor_pos_VS_Scissor_neg
KWMTBOMO04687	0.00580401617348599	1.07598429597212	0.097	0.174	1	CBCs	Scissor_pos_VS_Scissor_neg
KWMTBOMO14907	0.0184977722239924	1.07534658126464	0.107	0.179	1	CBCs	Scissor_pos_VS_Scissor_neg
KWMTBOMO04912	0.126059322429041	1.07525420680013	0.056	0.087	1	CBCs	Scissor_pos_VS_Scissor_neg
KWMTBOMO01387	0.00394695715716148	1.07496249261598	0.093	0.174	1	CBCs	Scissor_pos_VS_Scissor_neg
KWMTBOMO04567	0.0191302886411521	1.07481992655307	0.111	0.184	1	CBCs	Scissor_pos_VS_Scissor_neg
KWMTBOMO00539	0.113328129037349	1.0735145055501	0.265	0.377	1	CBCs	Scissor_pos_VS_Scissor_neg
KWMTBOMO13364	0.603591694862313	1.07345197047425	0.121	0.144	1	CBCs	Scissor_pos_VS_Scissor_neg
KWMTBOMO13641	0.439056165316348	1.07326063807319	0.039	0.052	1	CBCs	Scissor_pos_VS_Scissor_neg
KWMTBOMO08434	0.176124390476941	1.07169173695626	0.021	0.037	1	CBCs	Scissor_pos_VS_Scissor_neg
KWMTBOMO07453	0.133929085899263	1.07159330472045	0.323	0.34	1	CBCs	Scissor_pos_VS_Scissor_neg
KWMTBOMO02738	0.114514896193924	1.07150330135869	0.109	0.159	1	CBCs	Scissor_pos_VS_Scissor_neg
KWMTBOMO01699	0.027085965038079	1.07141713154947	0.012	0.035	1	CBCs	Scissor_pos_VS_Scissor_neg
KWMTBOMO02152	0.455163615369617	1.07077137781136	0.084	0.104	1	CBCs	Scissor_pos_VS_Scissor_neg
KWMTBOMO06413	0.0441823044038855	1.07049455219172	0.074	0.122	1	CBCs	Scissor_pos_VS_Scissor_neg
KWMTBOMO00725	0.0994154834890933	1.07020762497317	0.023	0.045	1	CBCs	Scissor_pos_VS_Scissor_neg
KWMTBOMO13408	0.236910516037034	1.07016995929522	0.012	0.022	1	CBCs	Scissor_pos_VS_Scissor_neg
KWMTBOMO04968	0.507396019358912	1.06939150952052	0.058	0.072	1	CBCs	Scissor_pos_VS_Scissor_neg
KWMTBOMO03865	0.0542337616569116	1.06845868268366	0.014	0.035	1	CBCs	Scissor_pos_VS_Scissor_neg
KWMTBOMO01056	0.00339809400258806	1.0670383996331	0.021	0.062	1	CBCs	Scissor_pos_VS_Scissor_neg
KWMTBOMO06286	0.518859555941577	1.06617847420713	0.088	0.079	1	CBCs	Scissor_pos_VS_Scissor_neg
KWMTBOMO13747	0.507780798022272	1.06472018344342	0.153	0.191	1	CBCs	Scissor_pos_VS_Scissor_neg
KWMTBOMO04195	0.647737562730228	1.0624422626582	0.007	0.01	1	CBCs	Scissor_pos_VS_Scissor_neg
KWMTBOMO01797	0.727579803484528	1.06238506934701	0.021	0.025	1	CBCs	Scissor_pos_VS_Scissor_neg
KWMTBOMO09922	0.0165237277162712	1.06174129739783	0.042	0.084	1	CBCs	Scissor_pos_VS_Scissor_neg
KWMTBOMO14251	0.00209169065309564	1.06127112388812	0.037	0.092	1	CBCs	Scissor_pos_VS_Scissor_neg
KWMTBOMO01579	0.577960155339238	1.06089786880683	0.051	0.062	1	CBCs	Scissor_pos_VS_Scissor_neg
KWMTBOMO05242	0.018789900246061	1.06037484427811	0.016	0.045	1	CBCs	Scissor_pos_VS_Scissor_neg
KWMTBOMO12525	0.00162351537236899	1.06036030894702	0.107	0.201	1	CBCs	Scissor_pos_VS_Scissor_neg
KWMTBOMO14810	0.0177169764394198	1.05980085877339	0.053	0.102	1	CBCs	Scissor_pos_VS_Scissor_neg
KWMTBOMO04277	0.109135159547153	1.05932561425529	0.019	0.037	1	CBCs	Scissor_pos_VS_Scissor_neg
KWMTBOMO09276	0.506708157283418	1.05831367641768	0.209	0.263	1	CBCs	Scissor_pos_VS_Scissor_neg
KWMTBOMO10854	0.754738378309381	1.0577340525608	0.028	0.025	1	CBCs	Scissor_pos_VS_Scissor_neg
KWMTBOMO06276	0.00436169990150692	1.05765578290067	0.058	0.119	1	CBCs	Scissor_pos_VS_Scissor_neg
KWMTBOMO14256	0.00998280553530591	1.05760004390792	0.07	0.129	1	CBCs	Scissor_pos_VS_Scissor_neg
KWMTBOMO13335	0.442527281500964	1.05723073283936	0.042	0.055	1	CBCs	Scissor_pos_VS_Scissor_neg
KWMTBOMO06588	0.00183341229713664	1.0570686378957	0.09	0.174	1	CBCs	Scissor_pos_VS_Scissor_neg
KWMTBOMO12167	0.179224667507269	1.05691725354201	0.387	0.457	1	CBCs	Scissor_pos_VS_Scissor_neg
KWMTBOMO01226	0.215940156988619	1.05673380792108	0.179	0.243	1	CBCs	Scissor_pos_VS_Scissor_neg
KWMTBOMO06543	0.0452240018234361	1.05643353079065	0.005	0.02	1	CBCs	Scissor_pos_VS_Scissor_neg
KWMTBOMO05634	0.00132392651617683	1.05600518213632	0.548	0.598	1	CBCs	Scissor_pos_VS_Scissor_neg
KWMTBOMO07395	0.0151020347061292	1.05520184222036	0.005	0.025	1	CBCs	Scissor_pos_VS_Scissor_neg
KWMTBOMO05924	0.255310398158852	1.05458283101368	0.079	0.107	1	CBCs	Scissor_pos_VS_Scissor_neg
KWMTBOMO12450	0.363621375750837	1.05414321946727	0.225	0.231	1	CBCs	Scissor_pos_VS_Scissor_neg
KWMTBOMO04504	0.0870330044416538	1.05402246302459	0.072	0.112	1	CBCs	Scissor_pos_VS_Scissor_neg
KWMTBOMO10740	0.0151602375575985	1.05370400867016	0.005	0.025	1	CBCs	Scissor_pos_VS_Scissor_neg
KWMTBOMO09983	0.475450634966076	1.0530056892719	0.032	0.025	1	CBCs	Scissor_pos_VS_Scissor_neg
KWMTBOMO12873	0.917366208416569	1.05215625476104	0.012	0.012	1	CBCs	Scissor_pos_VS_Scissor_neg
KWMTBOMO10291	0.317170019224161	1.05144241801165	0.125	0.164	1	CBCs	Scissor_pos_VS_Scissor_neg
KWMTBOMO01078	0.0815046879959599	1.05084327499907	0.162	0.233	1	CBCs	Scissor_pos_VS_Scissor_neg
KWMTBOMO06421	0.0357688049937642	1.05008447331564	0.019	0.045	1	CBCs	Scissor_pos_VS_Scissor_neg
KWMTBOMO03861	0.0893637332877041	1.05004191667313	0.283	0.414	1	CBCs	Scissor_pos_VS_Scissor_neg
KWMTBOMO07708	0.0620523365691051	1.04955892671092	0.028	0.055	1	CBCs	Scissor_pos_VS_Scissor_neg
KWMTBOMO13294	0.533990001778288	1.04921759878076	0.162	0.203	1	CBCs	Scissor_pos_VS_Scissor_neg
KWMTBOMO05593	0.295209125398938	1.04800564971977	0.139	0.184	1	CBCs	Scissor_pos_VS_Scissor_neg
KWMTBOMO07486	0.229736222858486	1.04737661527376	0.053	0.077	1	CBCs	Scissor_pos_VS_Scissor_neg
KWMTBOMO06580	0.00514897156440901	1.04717630320674	0.1	0.181	1	CBCs	Scissor_pos_VS_Scissor_neg
KWMTBOMO04916	0.755343078150944	1.04584613769129	0.028	0.032	1	CBCs	Scissor_pos_VS_Scissor_neg
KWMTBOMO05282	0.05536470908736	1.04491383287055	0.056	0.094	1	CBCs	Scissor_pos_VS_Scissor_neg
KWMTBOMO10323	0.046631590608173	1.04437841247499	0.023	0.05	1	CBCs	Scissor_pos_VS_Scissor_neg
KWMTBOMO02096	0.0553292657475167	1.04393006040126	0.014	0.035	1	CBCs	Scissor_pos_VS_Scissor_neg
KWMTBOMO02873	0.124552546395446	1.04356996262564	0.165	0.136	1	CBCs	Scissor_pos_VS_Scissor_neg
KWMTBOMO10961	0.0156997361189715	1.04352218156001	0.111	0.186	1	CBCs	Scissor_pos_VS_Scissor_neg
KWMTBOMO11961	0.348027380131754	1.04340528951208	0.012	0.02	1	CBCs	Scissor_pos_VS_Scissor_neg
KWMTBOMO12083	0.158024467157161	1.04337434918139	0.019	0.035	1	CBCs	Scissor_pos_VS_Scissor_neg
KWMTBOMO01625	0.124438431277214	1.04087236129203	0.014	0.03	1	CBCs	Scissor_pos_VS_Scissor_neg
KWMTBOMO12347	0.21597057812245	1.04035622622819	0.067	0.094	1	CBCs	Scissor_pos_VS_Scissor_neg
KWMTBOMO02024	0.020050235254427	1.03930423956738	0.032	0.069	1	CBCs	Scissor_pos_VS_Scissor_neg
KWMTBOMO14899	0.327464102754414	1.03883846444612	0.114	0.149	1	CBCs	Scissor_pos_VS_Scissor_neg
KWMTBOMO14080	0.255736947727358	1.03798215423512	0.376	0.417	1	CBCs	Scissor_pos_VS_Scissor_neg
KWMTBOMO02675	0.0291594295698587	1.03795054099622	0.032	0.067	1	CBCs	Scissor_pos_VS_Scissor_neg
KWMTBOMO12521	0.117136332732489	1.03694991518706	0.153	0.221	1	CBCs	Scissor_pos_VS_Scissor_neg
KWMTBOMO15605	0.275107392690994	1.0363969185353	0.007	0.015	1	CBCs	Scissor_pos_VS_Scissor_neg
KWMTBOMO10617	0.156909937125328	1.03625384727885	0.002	0.01	1	CBCs	Scissor_pos_VS_Scissor_neg
KWMTBOMO03495	0.173005294346332	1.03552452374332	0.06	0.089	1	CBCs	Scissor_pos_VS_Scissor_neg
KWMTBOMO15157	0.530757149798671	1.03522315013104	0.063	0.077	1	CBCs	Scissor_pos_VS_Scissor_neg
KWMTBOMO01194	0.479774286880397	1.03338540418859	0.169	0.169	1	CBCs	Scissor_pos_VS_Scissor_neg
KWMTBOMO15531	0.0323547796040123	1.0324284121596	0.081	0.134	1	CBCs	Scissor_pos_VS_Scissor_neg
KWMTBOMO00017	0.927058893849866	1.03199936512015	0.012	0.012	1	CBCs	Scissor_pos_VS_Scissor_neg
KWMTBOMO14658	0.292560428777441	1.03195487458737	0.095	0.127	1	CBCs	Scissor_pos_VS_Scissor_neg
KWMTBOMO03978	0.008887800647762	1.03112873781784	0.065	0.124	1	CBCs	Scissor_pos_VS_Scissor_neg
KWMTBOMO11972	0.00177730058716799	1.02947560942611	0.074	0.151	1	CBCs	Scissor_pos_VS_Scissor_neg
KWMTBOMO15351	0.0918967702566442	1.02931439367893	0.118	0.174	1	CBCs	Scissor_pos_VS_Scissor_neg
KWMTBOMO06049	0.121131873037143	1.02903714033634	0.241	0.347	1	CBCs	Scissor_pos_VS_Scissor_neg
KWMTBOMO01541	0.000118742344245948	1.02892431898303	0.459	0.442	1	CBCs	Scissor_pos_VS_Scissor_neg
KWMTBOMO07400	0.0329669587044563	1.02771819336631	0.081	0.134	1	CBCs	Scissor_pos_VS_Scissor_neg
KWMTBOMO08391	0.118790653023372	1.02640322165539	0.223	0.201	1	CBCs	Scissor_pos_VS_Scissor_neg
KWMTBOMO13998	0.205687771593766	1.02631571658953	0.009	0.02	1	CBCs	Scissor_pos_VS_Scissor_neg
KWMTBOMO14243	0.0862605439727265	1.02624109664655	0.002	0.012	1	CBCs	Scissor_pos_VS_Scissor_neg
KWMTBOMO10777	0.126575436606402	1.02455887705601	0.074	0.109	1	CBCs	Scissor_pos_VS_Scissor_neg
KWMTBOMO08376	0.486707429944296	1.02413861144428	0.07	0.087	1	CBCs	Scissor_pos_VS_Scissor_neg
KWMTBOMO03693	0.0775895019219589	1.02400253424572	0.005	0.017	1	CBCs	Scissor_pos_VS_Scissor_neg
KWMTBOMO11352	0.103135801850194	1.02388958438432	0.209	0.298	1	CBCs	Scissor_pos_VS_Scissor_neg
KWMTBOMO06248	0.00723767344100721	1.02330393046495	0.111	0.194	1	CBCs	Scissor_pos_VS_Scissor_neg
KWMTBOMO08759	0.907251869321806	1.02239553998933	0.116	0.129	1	CBCs	Scissor_pos_VS_Scissor_neg
KWMTBOMO08664	0.000652486238789545	1.02223969788435	0.019	0.067	1	CBCs	Scissor_pos_VS_Scissor_neg
KWMTBOMO06107	0.020227183512935	1.02184866848894	0.009	0.032	1	CBCs	Scissor_pos_VS_Scissor_neg
KWMTBOMO03798	0.537780793132164	1.02153724850595	0.211	0.261	1	CBCs	Scissor_pos_VS_Scissor_neg
KWMTBOMO03084	0.71475813914823	1.02121963610705	0.019	0.022	1	CBCs	Scissor_pos_VS_Scissor_neg
KWMTBOMO09931	0.172658737918652	1.02089386879865	0.021	0.037	1	CBCs	Scissor_pos_VS_Scissor_neg
KWMTBOMO12939	0.0146903141666612	1.02073308433994	0.002	0.02	1	CBCs	Scissor_pos_VS_Scissor_neg
KWMTBOMO11508	0.352553918009112	1.02042927399777	0.116	0.149	1	CBCs	Scissor_pos_VS_Scissor_neg
KWMTBOMO03731	0.371802880567051	1.01981493194426	0.005	0.01	1	CBCs	Scissor_pos_VS_Scissor_neg
KWMTBOMO14424	5.08837881689922e-05	1.01931460972873	0.081	0.189	0.858918344292588	CBCs	Scissor_pos_VS_Scissor_neg
KWMTBOMO15312	0.612928669946412	1.01914503373985	0.028	0.035	1	CBCs	Scissor_pos_VS_Scissor_neg
KWMTBOMO02658	0.0308738473674904	1.01886825975507	0.111	0.179	1	CBCs	Scissor_pos_VS_Scissor_neg
KWMTBOMO09342	0.193683972209402	1.01815978092019	0.223	0.208	1	CBCs	Scissor_pos_VS_Scissor_neg
KWMTBOMO06682	0.921684137323079	1.01809025775321	0.014	0.015	1	CBCs	Scissor_pos_VS_Scissor_neg
KWMTBOMO01564	0.00116483367218845	1.0177317107449	0.023	0.072	1	CBCs	Scissor_pos_VS_Scissor_neg
KWMTBOMO04699	0.124438431277214	1.01772069263195	0.014	0.03	1	CBCs	Scissor_pos_VS_Scissor_neg
KWMTBOMO00153	0.000173213860045176	1.01744318196391	0.032	0.099	1	CBCs	Scissor_pos_VS_Scissor_neg
KWMTBOMO00274	0.0877581234996742	1.01705795289471	0.021	0.042	1	CBCs	Scissor_pos_VS_Scissor_neg
KWMTBOMO15582	0.323080952948247	1.01637689710174	0.093	0.122	1	CBCs	Scissor_pos_VS_Scissor_neg
KWMTBOMO02674	0.221914246424988	1.0162628876246	0.005	0.012	1	CBCs	Scissor_pos_VS_Scissor_neg
KWMTBOMO12024	0.462048960668523	1.01560738293757	0.404	0.494	1	CBCs	Scissor_pos_VS_Scissor_neg
KWMTBOMO01152	0.197598030053664	1.0155389541527	0.035	0.055	1	CBCs	Scissor_pos_VS_Scissor_neg
KWMTBOMO11827	0.156909937125328	1.0151990405386	0.002	0.01	1	CBCs	Scissor_pos_VS_Scissor_neg
KWMTBOMO05667	0.430152370808786	1.01476679442075	0.142	0.179	1	CBCs	Scissor_pos_VS_Scissor_neg
KWMTBOMO01341	0.0746906514528847	1.01352697110386	0.582	0.697	1	CBCs	Scissor_pos_VS_Scissor_neg
KWMTBOMO07296	0.0654547403466896	1.01272029987338	0.007	0.022	1	CBCs	Scissor_pos_VS_Scissor_neg
KWMTBOMO13056	0.113648660846287	1.01249543408354	0.035	0.06	1	CBCs	Scissor_pos_VS_Scissor_neg
KWMTBOMO04044	0.0183438870506197	1.01170822509255	0.213	0.337	1	CBCs	Scissor_pos_VS_Scissor_neg
KWMTBOMO16353	0.220358390634358	1.01138337293549	0.065	0.092	1	CBCs	Scissor_pos_VS_Scissor_neg
KWMTBOMO11424	0.0394545527832593	1.01095191136899	0.555	0.677	1	CBCs	Scissor_pos_VS_Scissor_neg
KWMTBOMO09119	0.508084086885922	1.0100132852339	0.357	0.476	1	CBCs	Scissor_pos_VS_Scissor_neg
KWMTBOMO13635	0.0417725924442318	1.00994891252286	0.032	0.065	1	CBCs	Scissor_pos_VS_Scissor_neg
KWMTBOMO07642	0.141366033117583	1.00988480882305	0.016	0.032	1	CBCs	Scissor_pos_VS_Scissor_neg
KWMTBOMO14654	0.448950201757175	1.00929513126772	0.176	0.221	1	CBCs	Scissor_pos_VS_Scissor_neg
KWMTBOMO02003	0.0549764047113275	1.0092098489407	0.046	0.082	1	CBCs	Scissor_pos_VS_Scissor_neg
KWMTBOMO03618	5.34278734575305e-05	1.00887576997649	0.03	0.102	0.901862503963114	CBCs	Scissor_pos_VS_Scissor_neg
KWMTBOMO15119	0.234343702361154	1.00827034177457	0.146	0.199	1	CBCs	Scissor_pos_VS_Scissor_neg
KWMTBOMO13028	0.125371423746031	1.00808775213194	0.065	0.099	1	CBCs	Scissor_pos_VS_Scissor_neg
KWMTBOMO06110	0.0087176986229511	1.00672225602774	0.042	0.089	1	CBCs	Scissor_pos_VS_Scissor_neg
KWMTBOMO16371	0.0729191035989986	1.00631659973521	0.039	0.069	1	CBCs	Scissor_pos_VS_Scissor_neg
KWMTBOMO03917	0.0482520075955275	1.00609154713046	0.053	0.092	1	CBCs	Scissor_pos_VS_Scissor_neg
KWMTBOMO05420	0.521853070831833	1.00565725487726	0.014	0.02	1	CBCs	Scissor_pos_VS_Scissor_neg
KWMTBOMO14133	0.00630559551095491	1.00477268700888	0.019	0.055	1	CBCs	Scissor_pos_VS_Scissor_neg
KWMTBOMO11294	0.145825779170556	1.00237409028987	0.035	0.057	1	CBCs	Scissor_pos_VS_Scissor_neg
KWMTBOMO13309	1.72478953887192e-05	1.0022313187617	0.026	0.099	0.29114447416158	CBCs	Scissor_pos_VS_Scissor_neg
KWMTBOMO12050	0.00962067052011496	1.0019456926741	0.153	0.251	1	CBCs	Scissor_pos_VS_Scissor_neg
KWMTBOMO13596	0.0176421003194527	1.00191106296274	0.049	0.094	1	CBCs	Scissor_pos_VS_Scissor_neg
KWMTBOMO07194	0.0186640195945705	1.00190872718249	0.044	0.087	1	CBCs	Scissor_pos_VS_Scissor_neg
KWMTBOMO08523	0.00956059472883326	1.00141328033261	0.107	0.184	1	CBCs	Scissor_pos_VS_Scissor_neg
KWMTBOMO08593	0.00864892293247599	1.00138993098996	0.042	0.089	1	CBCs	Scissor_pos_VS_Scissor_neg
KWMTBOMO05910	0.60876028172263	1.00081004207824	0.278	0.32	1	CBCs	Scissor_pos_VS_Scissor_neg
KWMTBOMO12181	0.0802923087373107	1.00066962000055	0.042	0.072	1	CBCs	Scissor_pos_VS_Scissor_neg
KWMTBOMO01970	0.266689857256198	0.999971950321022	0.014	0.025	1	CBCs	Scissor_pos_VS_Scissor_neg
KWMTBOMO09085	0.00183232582168112	0.999886617491657	0.081	0.161	1	CBCs	Scissor_pos_VS_Scissor_neg
KWMTBOMO14460	0.0843479181138746	0.999826682709036	0.077	0.119	1	CBCs	Scissor_pos_VS_Scissor_neg
KWMTBOMO13990	0.529418881696244	0.998085312201047	0.039	0.05	1	CBCs	Scissor_pos_VS_Scissor_neg
KWMTBOMO07860	0.0998547724146364	0.997279626143684	0.118	0.174	1	CBCs	Scissor_pos_VS_Scissor_neg
KWMTBOMO05481	0.0061321449066119	0.99715064140708	0.081	0.151	1	CBCs	Scissor_pos_VS_Scissor_neg
KWMTBOMO05986	0.206187779641857	0.996433560030011	0.009	0.02	1	CBCs	Scissor_pos_VS_Scissor_neg
KWMTBOMO15197	0.608241379178925	0.996190375216333	0.028	0.035	1	CBCs	Scissor_pos_VS_Scissor_neg
KWMTBOMO10207	0.0775895019219589	0.995163535744314	0.005	0.017	1	CBCs	Scissor_pos_VS_Scissor_neg
KWMTBOMO01396	0.0149302423023445	0.994788188223486	0.023	0.057	1	CBCs	Scissor_pos_VS_Scissor_neg
KWMTBOMO16480	0.62726999704502	0.994349967761964	0.088	0.104	1	CBCs	Scissor_pos_VS_Scissor_neg
KWMTBOMO07880	0.174470782706344	0.994101900354924	0.255	0.365	1	CBCs	Scissor_pos_VS_Scissor_neg
KWMTBOMO10088	0.00683742025554091	0.993539866849194	0.028	0.069	1	CBCs	Scissor_pos_VS_Scissor_neg
KWMTBOMO14040	0.00337861966224043	0.992686384510022	0.053	0.114	1	CBCs	Scissor_pos_VS_Scissor_neg
KWMTBOMO00537	0.276643909276632	0.992270224484753	0.065	0.089	1	CBCs	Scissor_pos_VS_Scissor_neg
KWMTBOMO06167	0.0113505364151484	0.992238460008809	0.035	0.077	1	CBCs	Scissor_pos_VS_Scissor_neg
KWMTBOMO13926	0.0131902542155919	0.992035005978984	0.116	0.194	1	CBCs	Scissor_pos_VS_Scissor_neg
KWMTBOMO00654	0.530259111660079	0.991858920112622	0.037	0.047	1	CBCs	Scissor_pos_VS_Scissor_neg
KWMTBOMO03849	0.371098832827705	0.991596151503054	0.058	0.077	1	CBCs	Scissor_pos_VS_Scissor_neg
KWMTBOMO13341	0.642512447245737	0.990639324788394	0.007	0.01	1	CBCs	Scissor_pos_VS_Scissor_neg
KWMTBOMO00057	0.0410841611016237	0.989611738168487	0.021	0.047	1	CBCs	Scissor_pos_VS_Scissor_neg
KWMTBOMO14410	0.0759138154061295	0.988773017295544	0.042	0.072	1	CBCs	Scissor_pos_VS_Scissor_neg
KWMTBOMO14574	0.0415428618044347	0.988689840922167	0.021	0.047	1	CBCs	Scissor_pos_VS_Scissor_neg
KWMTBOMO01153	0.00164992738611368	0.988202288138334	0.005	0.035	1	CBCs	Scissor_pos_VS_Scissor_neg
KWMTBOMO14029	0.0075368709868458	0.987938002780679	0.009	0.037	1	CBCs	Scissor_pos_VS_Scissor_neg
KWMTBOMO07026	0.0936593057816775	0.986728340286118	0.037	0.065	1	CBCs	Scissor_pos_VS_Scissor_neg
KWMTBOMO07573	0.197287089469713	0.98671974023326	0.081	0.114	1	CBCs	Scissor_pos_VS_Scissor_neg
KWMTBOMO04429	0.780833141332131	0.985527111220499	0.06	0.067	1	CBCs	Scissor_pos_VS_Scissor_neg
KWMTBOMO11104	0.46441046502636	0.984709212936731	0.009	0.015	1	CBCs	Scissor_pos_VS_Scissor_neg
KWMTBOMO09967	0.0452240018234361	0.983069243799806	0.005	0.02	1	CBCs	Scissor_pos_VS_Scissor_neg
KWMTBOMO06195	0.143210087037279	0.982895934177269	0.109	0.154	1	CBCs	Scissor_pos_VS_Scissor_neg
KWMTBOMO01384	0.00487938194849609	0.981978284293123	0.053	0.112	1	CBCs	Scissor_pos_VS_Scissor_neg
KWMTBOMO05373	0.391332284401546	0.981031309385023	0.084	0.107	1	CBCs	Scissor_pos_VS_Scissor_neg
KWMTBOMO00553	0.0476429839384447	0.981018372282223	0.002	0.015	1	CBCs	Scissor_pos_VS_Scissor_neg
KWMTBOMO03016	0.328901812237105	0.980775809285315	0.049	0.067	1	CBCs	Scissor_pos_VS_Scissor_neg
KWMTBOMO00184	0.207181842626986	0.98007250633398	0.29	0.303	1	CBCs	Scissor_pos_VS_Scissor_neg
KWMTBOMO07227	0.0847612303376721	0.979000293744007	0.009	0.025	1	CBCs	Scissor_pos_VS_Scissor_neg
KWMTBOMO12931	0.304080363466198	0.978861396289813	0.03	0.045	1	CBCs	Scissor_pos_VS_Scissor_neg
KWMTBOMO01996	0.00130111488296117	0.97872550626324	0.209	0.36	1	CBCs	Scissor_pos_VS_Scissor_neg
KWMTBOMO02844	0.0921089131380309	0.97844246287649	0.13	0.191	1	CBCs	Scissor_pos_VS_Scissor_neg
KWMTBOMO14352	0.280537616976649	0.978035764979491	0.148	0.194	1	CBCs	Scissor_pos_VS_Scissor_neg
KWMTBOMO01784	0.150634929793701	0.977727312195683	0.16	0.223	1	CBCs	Scissor_pos_VS_Scissor_neg
KWMTBOMO02710	0.371802880567051	0.977502300157585	0.005	0.01	1	CBCs	Scissor_pos_VS_Scissor_neg
KWMTBOMO15486	0.000794980575192255	0.976173311471173	0.121	0.233	1	CBCs	Scissor_pos_VS_Scissor_neg
KWMTBOMO06873	0.0550700675557778	0.976015480803773	0.081	0.129	1	CBCs	Scissor_pos_VS_Scissor_neg
KWMTBOMO08134	0.130154077895571	0.974181175240955	0.176	0.248	1	CBCs	Scissor_pos_VS_Scissor_neg
KWMTBOMO09116	0.394873558527162	0.974071619008655	0.016	0.025	1	CBCs	Scissor_pos_VS_Scissor_neg
KWMTBOMO04244	0.311990464928183	0.973728340024111	0.019	0.03	1	CBCs	Scissor_pos_VS_Scissor_neg
KWMTBOMO06766	0.0297522940425689	0.973365034100831	0.383	0.385	1	CBCs	Scissor_pos_VS_Scissor_neg
KWMTBOMO01995	0.0492356758624295	0.97292520464883	0.095	0.149	1	CBCs	Scissor_pos_VS_Scissor_neg
KWMTBOMO01574	0.122872381103664	0.972517005552894	0.086	0.127	1	CBCs	Scissor_pos_VS_Scissor_neg
KWMTBOMO11797	0.734486374569824	0.972151953862288	0.023	0.027	1	CBCs	Scissor_pos_VS_Scissor_neg
KWMTBOMO06590	0.794112320813075	0.971362385739095	0.167	0.194	1	CBCs	Scissor_pos_VS_Scissor_neg
KWMTBOMO01991	0.140041973628615	0.971338076130961	0.146	0.203	1	CBCs	Scissor_pos_VS_Scissor_neg
KWMTBOMO06619	0.00220288904429379	0.971329118168854	0.501	0.489	1	CBCs	Scissor_pos_VS_Scissor_neg
KWMTBOMO03404	0.192548384921344	0.971088151038312	0.102	0.141	1	CBCs	Scissor_pos_VS_Scissor_neg
KWMTBOMO05846	0.0515491191588483	0.971004186044814	0.23	0.34	1	CBCs	Scissor_pos_VS_Scissor_neg
KWMTBOMO03991	0.79115845938386	0.970906937825584	0.269	0.333	1	CBCs	Scissor_pos_VS_Scissor_neg
KWMTBOMO05257	0.213817683039538	0.970881072829621	0.239	0.33	1	CBCs	Scissor_pos_VS_Scissor_neg
KWMTBOMO05213	8.07778637178127e-28	0.970553094722919	0.921	0.913	1.36353033955668e-23	CBCs	Scissor_pos_VS_Scissor_neg
KWMTBOMO02187	0.00478473034671651	0.970508661732867	0.077	0.146	1	CBCs	Scissor_pos_VS_Scissor_neg
KWMTBOMO09278	0.000525264906391077	0.970181622347139	0.046	0.117	1	CBCs	Scissor_pos_VS_Scissor_neg
KWMTBOMO14277	0.514443403010962	0.96946322195691	0.077	0.094	1	CBCs	Scissor_pos_VS_Scissor_neg
KWMTBOMO00606	0.00700223175670652	0.968993402635625	0.023	0.062	1	CBCs	Scissor_pos_VS_Scissor_neg
KWMTBOMO11413	0.0217573931813459	0.968803841056364	0.111	0.181	1	CBCs	Scissor_pos_VS_Scissor_neg
KWMTBOMO08454	0.0757091162470088	0.968765661282806	0.227	0.33	1	CBCs	Scissor_pos_VS_Scissor_neg
KWMTBOMO00671	0.0406796580077377	0.968669315903815	0.107	0.166	1	CBCs	Scissor_pos_VS_Scissor_neg
KWMTBOMO12017	0.0189874042115776	0.968602081763168	0.016	0.045	1	CBCs	Scissor_pos_VS_Scissor_neg
KWMTBOMO10681	0.426220035317418	0.968442439551857	0.007	0.012	1	CBCs	Scissor_pos_VS_Scissor_neg
KWMTBOMO02589	0.156909937125328	0.96838370210264	0.002	0.01	1	CBCs	Scissor_pos_VS_Scissor_neg
KWMTBOMO01533	0.15442743879835	0.968227334744362	0.079	0.114	1	CBCs	Scissor_pos_VS_Scissor_neg
KWMTBOMO06860	0.839656219926756	0.968208473916182	0.014	0.012	1	CBCs	Scissor_pos_VS_Scissor_neg
KWMTBOMO04676	0.000693063564746184	0.968101303152214	0.151	0.275	1	CBCs	Scissor_pos_VS_Scissor_neg
KWMTBOMO05429	0.105281369351336	0.967537782376791	0.012	0.027	1	CBCs	Scissor_pos_VS_Scissor_neg
KWMTBOMO09527	0.997322397618918	0.967392617211572	0.241	0.28	1	CBCs	Scissor_pos_VS_Scissor_neg
KWMTBOMO07312	0.000286593627616223	0.96658712603525	0.09	0.191	1	CBCs	Scissor_pos_VS_Scissor_neg
KWMTBOMO04027	0.536703642884775	0.965811887698494	0.274	0.34	1	CBCs	Scissor_pos_VS_Scissor_neg
KWMTBOMO15130	0.000982664953258409	0.964027894709141	0.009	0.047	1	CBCs	Scissor_pos_VS_Scissor_neg
KWMTBOMO05932	0.680125094576003	0.963944012239311	0.411	0.548	1	CBCs	Scissor_pos_VS_Scissor_neg
KWMTBOMO15671	0.272992065418092	0.963680871929275	0.007	0.015	1	CBCs	Scissor_pos_VS_Scissor_neg
KWMTBOMO08000	0.41590222484526	0.963655896224135	0.019	0.027	1	CBCs	Scissor_pos_VS_Scissor_neg
KWMTBOMO00548	3.18085307986584e-05	0.962269959376441	0.074	0.179	0.536927999881355	CBCs	Scissor_pos_VS_Scissor_neg
KWMTBOMO03911	0.00870158863977065	0.962210142557577	0.005	0.027	1	CBCs	Scissor_pos_VS_Scissor_neg
KWMTBOMO01433	0.072340453810267	0.962071490747401	0.153	0.226	1	CBCs	Scissor_pos_VS_Scissor_neg
KWMTBOMO09981	0.0852945211602101	0.961719453085057	0.035	0.062	1	CBCs	Scissor_pos_VS_Scissor_neg
KWMTBOMO14418	0.039568957745945	0.960258325615172	0.053	0.094	1	CBCs	Scissor_pos_VS_Scissor_neg
KWMTBOMO12462	0.0076947917757507	0.960150322957512	0.081	0.149	1	CBCs	Scissor_pos_VS_Scissor_neg
KWMTBOMO13969	0.000547093979656727	0.959666933701104	0.021	0.072	1	CBCs	Scissor_pos_VS_Scissor_neg
KWMTBOMO09900	0.00225423649109704	0.959156030507857	0.552	0.645	1	CBCs	Scissor_pos_VS_Scissor_neg
KWMTBOMO11008	0.00699556043527115	0.958879489699054	0.086	0.156	1	CBCs	Scissor_pos_VS_Scissor_neg
KWMTBOMO01897	0.669949740735233	0.958530335789084	0.046	0.055	1	CBCs	Scissor_pos_VS_Scissor_neg
KWMTBOMO15979	0.00048724839925153	0.958156172897769	0.056	0.132	1	CBCs	Scissor_pos_VS_Scissor_neg
KWMTBOMO05230	0.000444946443409022	0.958038661011615	0.111	0.218	1	CBCs	Scissor_pos_VS_Scissor_neg
KWMTBOMO06643	0.0400436323344074	0.957895920866986	0.077	0.127	1	CBCs	Scissor_pos_VS_Scissor_neg
KWMTBOMO05784	0.0582011533923378	0.957770585285301	0.049	0.084	1	CBCs	Scissor_pos_VS_Scissor_neg
KWMTBOMO04680	0.078859806057061	0.957534099239804	0.051	0.084	1	CBCs	Scissor_pos_VS_Scissor_neg
KWMTBOMO14610	0.00189701442403566	0.956117431376415	0.023	0.069	1	CBCs	Scissor_pos_VS_Scissor_neg
KWMTBOMO13531	0.058348934451518	0.955226090409077	0.102	0.159	1	CBCs	Scissor_pos_VS_Scissor_neg
KWMTBOMO05714	0.0658918563213636	0.954662779673383	0.053	0.089	1	CBCs	Scissor_pos_VS_Scissor_neg
KWMTBOMO00776	0.588092633914509	0.954444484127223	0.028	0.022	1	CBCs	Scissor_pos_VS_Scissor_neg
KWMTBOMO13316	0.0188469568304842	0.954022210280982	0.037	0.077	1	CBCs	Scissor_pos_VS_Scissor_neg
KWMTBOMO09106	0.268663514924645	0.953828644699942	0.051	0.072	1	CBCs	Scissor_pos_VS_Scissor_neg
KWMTBOMO01851	0.00896461257251411	0.953398186671417	0.123	0.208	1	CBCs	Scissor_pos_VS_Scissor_neg
KWMTBOMO05791	0.895926131032731	0.95297004778692	0.167	0.194	1	CBCs	Scissor_pos_VS_Scissor_neg
KWMTBOMO15096	0.322916674696628	0.952514929517102	0.021	0.032	1	CBCs	Scissor_pos_VS_Scissor_neg
KWMTBOMO12265	0.124720982116355	0.952444708377328	0.104	0.149	1	CBCs	Scissor_pos_VS_Scissor_neg
KWMTBOMO05793	0.0126349169234737	0.952070362318236	0.042	0.087	1	CBCs	Scissor_pos_VS_Scissor_neg
KWMTBOMO15769	0.495373862661762	0.951770534471262	0.183	0.228	1	CBCs	Scissor_pos_VS_Scissor_neg
KWMTBOMO14487	0.0322520439364068	0.95101717381383	0.142	0.218	1	CBCs	Scissor_pos_VS_Scissor_neg
KWMTBOMO09918	0.00982499452865863	0.950429414488771	0.146	0.241	1	CBCs	Scissor_pos_VS_Scissor_neg
KWMTBOMO07343	0.837381100336314	0.948648699556868	0.014	0.012	1	CBCs	Scissor_pos_VS_Scissor_neg
KWMTBOMO03961	0.983261063140574	0.947926903866627	0.216	0.251	1	CBCs	Scissor_pos_VS_Scissor_neg
KWMTBOMO06829	0.211026122496756	0.947301327835894	0.039	0.06	1	CBCs	Scissor_pos_VS_Scissor_neg
KWMTBOMO05277	0.157588320027559	0.947024756695965	0.012	0.025	1	CBCs	Scissor_pos_VS_Scissor_neg
KWMTBOMO05746	0.329738173901017	0.946792928791166	0.053	0.072	1	CBCs	Scissor_pos_VS_Scissor_neg
KWMTBOMO08789	0.0155827873577807	0.946503728570432	0.035	0.074	1	CBCs	Scissor_pos_VS_Scissor_neg
KWMTBOMO15780	0.105281369351336	0.944690755723816	0.012	0.027	1	CBCs	Scissor_pos_VS_Scissor_neg
KWMTBOMO07970	0.282017685336536	0.944086806808302	0.056	0.077	1	CBCs	Scissor_pos_VS_Scissor_neg
KWMTBOMO16088	0.00199135699239975	0.943712028814298	0.237	0.392	1	CBCs	Scissor_pos_VS_Scissor_neg
KWMTBOMO05513	0.708219710425155	0.94371180010325	0.088	0.102	1	CBCs	Scissor_pos_VS_Scissor_neg
KWMTBOMO06404	0.0235420993592324	0.943459963524338	0.111	0.181	1	CBCs	Scissor_pos_VS_Scissor_neg
KWMTBOMO16269	0.017298925357281	0.943337463087827	0.012	0.037	1	CBCs	Scissor_pos_VS_Scissor_neg
KWMTBOMO05394	0.0688900161825938	0.943041423225746	0.012	0.03	1	CBCs	Scissor_pos_VS_Scissor_neg
KWMTBOMO12896	0.0369150427318905	0.942944225935807	0.118	0.186	1	CBCs	Scissor_pos_VS_Scissor_neg
KWMTBOMO01755	0.0022440683111466	0.942856159667705	0.063	0.132	1	CBCs	Scissor_pos_VS_Scissor_neg
KWMTBOMO08881	0.159965270049806	0.942821508708865	0.046	0.072	1	CBCs	Scissor_pos_VS_Scissor_neg
KWMTBOMO15535	0.084994960702628	0.941420364061936	0.009	0.025	1	CBCs	Scissor_pos_VS_Scissor_neg
KWMTBOMO00516	0.0448348148295941	0.941375009435315	0.028	0.057	1	CBCs	Scissor_pos_VS_Scissor_neg
KWMTBOMO08763	0.140986304046528	0.939911879848336	0.067	0.099	1	CBCs	Scissor_pos_VS_Scissor_neg
KWMTBOMO14582	0.927370600204283	0.939291818923255	0.009	0.01	1	CBCs	Scissor_pos_VS_Scissor_neg
KWMTBOMO16180	0.131370690093135	0.939106699993067	0.005	0.015	1	CBCs	Scissor_pos_VS_Scissor_neg
KWMTBOMO09606	0.00409686358987683	0.937737067952882	0.051	0.109	1	CBCs	Scissor_pos_VS_Scissor_neg
KWMTBOMO13712	0.297842941847308	0.937249455833922	0.276	0.375	1	CBCs	Scissor_pos_VS_Scissor_neg
KWMTBOMO04571	0.941672049927269	0.937164499039217	0.262	0.313	1	CBCs	Scissor_pos_VS_Scissor_neg
KWMTBOMO02453	0.0171885520763366	0.936641734039287	0.03	0.067	1	CBCs	Scissor_pos_VS_Scissor_neg
KWMTBOMO16602	0.197598030053664	0.936415278953242	0.035	0.055	1	CBCs	Scissor_pos_VS_Scissor_neg
KWMTBOMO15656	0.606171907743302	0.936232819268443	0.063	0.074	1	CBCs	Scissor_pos_VS_Scissor_neg
KWMTBOMO03082	0.685722692736088	0.935789699430615	0.012	0.015	1	CBCs	Scissor_pos_VS_Scissor_neg
KWMTBOMO10389	3.313413049633e-12	0.93549190274147	0.761	0.784	5.5930412277805e-08	CBCs	Scissor_pos_VS_Scissor_neg
[truncated: 6,226 more rows]

## Sheet: 2-ESMs
gene_name	p_val	avg_log2FC	pct.1	pct.2	p_val_adj	CellType	Compare
KWMTBOMO04643	0.000218336001702909	5.53545058495153	0.245	0.02	1	ESMs	Scissor_pos_VS_Scissor_neg
KWMTBOMO10016	0.000377816274241505	5.52767939551129	0.207	0	1	ESMs	Scissor_pos_VS_Scissor_neg
KWMTBOMO14088	0.000566774691045516	5.50728555958663	0.196	0	1	ESMs	Scissor_pos_VS_Scissor_neg
KWMTBOMO03714	0.000102420347743354	5.46646957055348	0.262	0.02	1	ESMs	Scissor_pos_VS_Scissor_neg
KWMTBOMO14843	0.000951227460622342	5.4240163706447	0.183	0	1	ESMs	Scissor_pos_VS_Scissor_neg
KWMTBOMO10267	0.00199106143360603	5.39893897677168	0.163	0	1	ESMs	Scissor_pos_VS_Scissor_neg
KWMTBOMO11817	0.0513534885866492	5.37484580635828	0.102	0.02	1	ESMs	Scissor_pos_VS_Scissor_neg
KWMTBOMO05210	3.55745081926425e-05	5.30903864163111	0.286	0.02	0.600497698291806	ESMs	Scissor_pos_VS_Scissor_neg
KWMTBOMO09346	0.0225709391335129	5.21179726213172	0.095	0	1	ESMs	Scissor_pos_VS_Scissor_neg
KWMTBOMO01522	0.00556855161868918	5.09295216002227	0.25	0.1	1	ESMs	Scissor_pos_VS_Scissor_neg
KWMTBOMO12164	0.00397968150461485	5.02963050643545	0.173	0.02	1	ESMs	Scissor_pos_VS_Scissor_neg
KWMTBOMO14947	0.0110187940596984	4.97415847396054	0.116	0	1	ESMs	Scissor_pos_VS_Scissor_neg
KWMTBOMO06607	0.00408595028936833	4.93071667822387	0.144	0	1	ESMs	Scissor_pos_VS_Scissor_neg
KWMTBOMO09538	0.0102487798289456	4.87950553330163	0.118	0	1	ESMs	Scissor_pos_VS_Scissor_neg
KWMTBOMO14698	5.52365023793032e-09	4.75252239860269	0.525	0.14	9.32392160162638e-05	ESMs	Scissor_pos_VS_Scissor_neg
KWMTBOMO03909	0.00136723146049854	4.69005615934998	0.224	0.04	1	ESMs	Scissor_pos_VS_Scissor_neg
KWMTBOMO02539	0.0474496734834612	4.62306749463627	0.073	0	1	ESMs	Scissor_pos_VS_Scissor_neg
KWMTBOMO09802	0.00854523552729372	4.61417124715948	0.123	0	1	ESMs	Scissor_pos_VS_Scissor_neg
KWMTBOMO04375	0.0102487783890107	4.59066445780917	0.118	0	1	ESMs	Scissor_pos_VS_Scissor_neg
KWMTBOMO01330	0.00765853226491379	4.58370556681363	0.126	0	1	ESMs	Scissor_pos_VS_Scissor_neg
KWMTBOMO16224	0.0108448713688296	4.52376291232864	0.146	0.02	1	ESMs	Scissor_pos_VS_Scissor_neg
KWMTBOMO14448	0.00984081795243412	4.49130605763335	0.174	0.04	1	ESMs	Scissor_pos_VS_Scissor_neg
KWMTBOMO05219	0.0210202085977786	4.48531834184482	0.097	0	1	ESMs	Scissor_pos_VS_Scissor_neg
KWMTBOMO07701	0.0345346874610775	4.45217279519071	0.083	0	1	ESMs	Scissor_pos_VS_Scissor_neg
KWMTBOMO10565	0.0163710469637377	4.40504415873293	0.104	0	1	ESMs	Scissor_pos_VS_Scissor_neg
KWMTBOMO16122	0.0182253591758689	4.35280901473029	0.101	0	1	ESMs	Scissor_pos_VS_Scissor_neg
KWMTBOMO05888	0.0383953598792303	4.28938924893648	0.08	0	1	ESMs	Scissor_pos_VS_Scissor_neg
KWMTBOMO12875	0.0246929109009642	4.28113754863144	0.149	0.04	1	ESMs	Scissor_pos_VS_Scissor_neg
KWMTBOMO05599	0.0289357337571069	4.27099484335618	0.088	0	1	ESMs	Scissor_pos_VS_Scissor_neg
KWMTBOMO12437	0.111090365426057	4.21418402206083	0.049	0	1	ESMs	Scissor_pos_VS_Scissor_neg
KWMTBOMO05725	0.0158943485709996	4.21317227209229	0.161	0.04	1	ESMs	Scissor_pos_VS_Scissor_neg
KWMTBOMO10356	0.0838996565934988	4.20590979701214	0.137	0.06	1	ESMs	Scissor_pos_VS_Scissor_neg
KWMTBOMO11521	0.0279285765494511	4.18588104032358	0.089	0	1	ESMs	Scissor_pos_VS_Scissor_neg
KWMTBOMO10178	0.0237971594189224	4.15281046130627	0.124	0.02	1	ESMs	Scissor_pos_VS_Scissor_neg
KWMTBOMO13701	0.0869302669038546	4.12263148806425	0.136	0.06	1	ESMs	Scissor_pos_VS_Scissor_neg
KWMTBOMO05222	0.0838996616301498	4.11337151470131	0.137	0.06	1	ESMs	Scissor_pos_VS_Scissor_neg
KWMTBOMO14024	0.00203379393889434	4.10352842391077	0.307	0.14	1	ESMs	Scissor_pos_VS_Scissor_neg
KWMTBOMO09269	0.0552196502260897	4.0852078441372	0.1	0.02	1	ESMs	Scissor_pos_VS_Scissor_neg
KWMTBOMO03899	0.0133296564860941	4.05616103345806	0.228	0.1	1	ESMs	Scissor_pos_VS_Scissor_neg
KWMTBOMO04715	0.0269559690610108	4.0531	0.09	0	1	ESMs	Scissor_pos_VS_Scissor_neg
KWMTBOMO10217	0.0675356979769666	3.98452830480731	0.063	0	1	ESMs	Scissor_pos_VS_Scissor_neg
KWMTBOMO09226	0.0426841158806488	3.9657778044789	0.076	0	1	ESMs	Scissor_pos_VS_Scissor_neg
KWMTBOMO04698	0.0607442692762378	3.95284082641728	0.066	0	1	ESMs	Scissor_pos_VS_Scissor_neg
KWMTBOMO16481	0.0142880886200948	3.92505754619284	0.164	0.04	1	ESMs	Scissor_pos_VS_Scissor_neg
KWMTBOMO10528	0.0374139224774337	3.90990249997503	0.112	0.02	1	ESMs	Scissor_pos_VS_Scissor_neg
KWMTBOMO00355	0.0343842264180894	3.89383006775165	0.114	0.02	1	ESMs	Scissor_pos_VS_Scissor_neg
KWMTBOMO02795	0.0699663835588666	3.88654646450264	0.062	0	1	ESMs	Scissor_pos_VS_Scissor_neg
KWMTBOMO11112	0.0590554317561153	3.88625489229512	0.188	0.1	1	ESMs	Scissor_pos_VS_Scissor_neg
KWMTBOMO14883	0.0373685755277946	3.87859892645743	0.137	0.04	1	ESMs	Scissor_pos_VS_Scissor_neg
KWMTBOMO07243	0.0532521217686997	3.87074596267865	0.101	0.02	1	ESMs	Scissor_pos_VS_Scissor_neg
KWMTBOMO13490	0.0357767988131174	3.86907575467975	0.082	0	1	ESMs	Scissor_pos_VS_Scissor_neg
KWMTBOMO04017	0.00025436881827226	3.85543896662456	0.352	0.14	1	ESMs	Scissor_pos_VS_Scissor_neg
KWMTBOMO06271	0.0889945218630194	3.84138764696712	0.113	0.04	1	ESMs	Scissor_pos_VS_Scissor_neg
KWMTBOMO09874	0.0821957783263104	3.83785773731737	0.089	0.02	1	ESMs	Scissor_pos_VS_Scissor_neg
KWMTBOMO05904	0.0491534213887548	3.83109386523309	0.072	0	1	ESMs	Scissor_pos_VS_Scissor_neg
KWMTBOMO12087	0.16300323759657	3.82583728593085	0.069	0.02	1	ESMs	Scissor_pos_VS_Scissor_neg
KWMTBOMO06413	0.0615610197854048	3.81520474233027	0.097	0.02	1	ESMs	Scissor_pos_VS_Scissor_neg
KWMTBOMO15050	0.0496403825283352	3.80396199116127	0.153	0.06	1	ESMs	Scissor_pos_VS_Scissor_neg
KWMTBOMO02615	0.162075001710646	3.78191362272751	0.095	0.04	1	ESMs	Scissor_pos_VS_Scissor_neg
KWMTBOMO05137	0.132246788995857	3.78012500028504	0.124	0.06	1	ESMs	Scissor_pos_VS_Scissor_neg
KWMTBOMO09262	0.0412040779928257	3.77747205273614	0.077	0	1	ESMs	Scissor_pos_VS_Scissor_neg
KWMTBOMO08240	0.0298926350567909	3.72980004729292	0.118	0.02	1	ESMs	Scissor_pos_VS_Scissor_neg
KWMTBOMO05047	0.271809735422423	3.72852125765277	0.08	0.04	1	ESMs	Scissor_pos_VS_Scissor_neg
KWMTBOMO01695	0.060744265133937	3.68759875548207	0.066	0	1	ESMs	Scissor_pos_VS_Scissor_neg
KWMTBOMO04267	0.0405918269234605	3.68186002889275	0.158	0.06	1	ESMs	Scissor_pos_VS_Scissor_neg
KWMTBOMO10353	0.0383727938657237	3.67852837232425	0.111	0.02	1	ESMs	Scissor_pos_VS_Scissor_neg
KWMTBOMO05205	0.135101400580682	3.66927696456523	0.182	0.12	1	ESMs	Scissor_pos_VS_Scissor_neg
KWMTBOMO05274	0.00328730669416742	3.66379632612679	0.326	0.18	1	ESMs	Scissor_pos_VS_Scissor_neg
KWMTBOMO13619	0.281874370217714	3.65815496066514	0.023	0	1	ESMs	Scissor_pos_VS_Scissor_neg
KWMTBOMO12971	0.0513534861031585	3.65470474967958	0.102	0.02	1	ESMs	Scissor_pos_VS_Scissor_neg
KWMTBOMO06159	0.0787596949803334	3.65322769746544	0.18	0.1	1	ESMs	Scissor_pos_VS_Scissor_neg
KWMTBOMO16025	0.136116239221076	3.64131687252882	0.074	0.02	1	ESMs	Scissor_pos_VS_Scissor_neg
KWMTBOMO03158	0.0835244210347483	3.63660064304113	0.057	0	1	ESMs	Scissor_pos_VS_Scissor_neg
KWMTBOMO12118	0.075097791011016	3.58606145654576	0.06	0	1	ESMs	Scissor_pos_VS_Scissor_neg
KWMTBOMO05181	0.0699663835588666	3.58467227901839	0.062	0	1	ESMs	Scissor_pos_VS_Scissor_neg
KWMTBOMO04167	0.0778056062875795	3.58230777268143	0.059	0	1	ESMs	Scissor_pos_VS_Scissor_neg
KWMTBOMO12965	0.0821957820301409	3.58048879970254	0.089	0.02	1	ESMs	Scissor_pos_VS_Scissor_neg
KWMTBOMO06430	0.175207810607893	3.5749147012715	0.067	0.02	1	ESMs	Scissor_pos_VS_Scissor_neg
KWMTBOMO14256	0.0792829646752011	3.56453134323166	0.09	0.02	1	ESMs	Scissor_pos_VS_Scissor_neg
KWMTBOMO16125	1.98713979229901e-07	3.56057497102819	0.409	0.02	0.00335429196940073	ESMs	Scissor_pos_VS_Scissor_neg
KWMTBOMO01859	0.117852717326964	3.55882101890539	0.079	0.02	1	ESMs	Scissor_pos_VS_Scissor_neg
KWMTBOMO11039	0.167817154681387	3.53981202323779	0.094	0.04	1	ESMs	Scissor_pos_VS_Scissor_neg
KWMTBOMO03907	0.221323673940503	3.53779771063823	0.086	0.04	1	ESMs	Scissor_pos_VS_Scissor_neg
KWMTBOMO15964	0.113683983273411	3.53213344797207	0.08	0.02	1	ESMs	Scissor_pos_VS_Scissor_neg
KWMTBOMO13517	0.111090365426057	3.51766308617473	0.049	0	1	ESMs	Scissor_pos_VS_Scissor_neg
KWMTBOMO04133	0.0586371737592059	3.51426846650943	0.067	0	1	ESMs	Scissor_pos_VS_Scissor_neg
KWMTBOMO05886	0.075097791011016	3.50472336550488	0.06	0	1	ESMs	Scissor_pos_VS_Scissor_neg
KWMTBOMO10120	0.0237552192125265	3.50371214262997	0.194	0.08	1	ESMs	Scissor_pos_VS_Scissor_neg
KWMTBOMO10145	0.0896748532407655	3.48522904559668	0.055	0	1	ESMs	Scissor_pos_VS_Scissor_neg
KWMTBOMO05989	0.0997886848146907	3.45380965560451	0.052	0	1	ESMs	Scissor_pos_VS_Scissor_neg
KWMTBOMO06502	0.123737362873254	3.44454177197911	0.045	0	1	ESMs	Scissor_pos_VS_Scissor_neg
KWMTBOMO03163	1.38210564383621e-07	3.44453335258781	0.498	0.14	0.00233299432679553	ESMs	Scissor_pos_VS_Scissor_neg
KWMTBOMO14255	0.103416626615765	3.43848158870412	0.051	0	1	ESMs	Scissor_pos_VS_Scissor_neg
KWMTBOMO07271	0.11138535377343	3.43763339058879	0.129	0.06	1	ESMs	Scissor_pos_VS_Scissor_neg
KWMTBOMO14524	0.0835244210347483	3.40365974454315	0.057	0	1	ESMs	Scissor_pos_VS_Scissor_neg
KWMTBOMO10998	0.346240619245351	3.3973060095393	0.094	0.06	1	ESMs	Scissor_pos_VS_Scissor_neg
KWMTBOMO02791	0.0835244210347483	3.3883809162086	0.057	0	1	ESMs	Scissor_pos_VS_Scissor_neg
KWMTBOMO09228	0.0958444724345597	3.37715496483684	0.111	0.04	1	ESMs	Scissor_pos_VS_Scissor_neg
KWMTBOMO05310	0.357403678463096	3.37583808008787	0.093	0.06	1	ESMs	Scissor_pos_VS_Scissor_neg
KWMTBOMO09003	0.202479001232696	3.37526691060314	0.063	0.02	1	ESMs	Scissor_pos_VS_Scissor_neg
KWMTBOMO04132	0.311397050099847	3.35988129520882	0.075	0.04	1	ESMs	Scissor_pos_VS_Scissor_neg
KWMTBOMO10146	0.0724859250821224	3.3447542489847	0.061	0	1	ESMs	Scissor_pos_VS_Scissor_neg
KWMTBOMO10531	0.137913719002478	3.3379922218639	0.042	0	1	ESMs	Scissor_pos_VS_Scissor_neg
KWMTBOMO07428	1.36877128480544e-11	3.33395990334139	0.686	0.3	2.31048592875158e-07	ESMs	Scissor_pos_VS_Scissor_neg
KWMTBOMO13941	0.210386253513495	3.33366826696698	0.062	0.02	1	ESMs	Scissor_pos_VS_Scissor_neg
KWMTBOMO04331	0.0945323019905704	3.32776270410929	0.175	0.1	1	ESMs	Scissor_pos_VS_Scissor_neg
KWMTBOMO11719	0.202479001232696	3.31386493189133	0.063	0.02	1	ESMs	Scissor_pos_VS_Scissor_neg
KWMTBOMO15629	0.234104490036405	3.31148527803981	0.059	0.02	1	ESMs	Scissor_pos_VS_Scissor_neg
KWMTBOMO15907	0.129287742356916	3.31062478024518	0.125	0.06	1	ESMs	Scissor_pos_VS_Scissor_neg
KWMTBOMO01193	0.101693294112063	3.30875129335766	0.132	0.06	1	ESMs	Scissor_pos_VS_Scissor_neg
KWMTBOMO03280	2.5740725099305e-12	3.30530438353372	0.677	0.18	4.34503439676268e-08	ESMs	Scissor_pos_VS_Scissor_neg
KWMTBOMO14146	0.0748985621262466	3.28949306509599	0.092	0.02	1	ESMs	Scissor_pos_VS_Scissor_neg
KWMTBOMO05908	0.123737362873254	3.2873189182355	0.045	0	1	ESMs	Scissor_pos_VS_Scissor_neg
KWMTBOMO06452	0.123737354269002	3.28642321130868	0.045	0	1	ESMs	Scissor_pos_VS_Scissor_neg
KWMTBOMO10828	0.421510928077572	3.28331111090132	0.066	0.04	1	ESMs	Scissor_pos_VS_Scissor_neg
KWMTBOMO03692	0.0236101535465965	3.27400889093962	0.249	0.14	1	ESMs	Scissor_pos_VS_Scissor_neg
KWMTBOMO14837	0.11936146537867	3.26490986330012	0.046	0	1	ESMs	Scissor_pos_VS_Scissor_neg
KWMTBOMO14959	0.301013469303121	3.26222170695624	0.076	0.04	1	ESMs	Scissor_pos_VS_Scissor_neg
KWMTBOMO12010	0.11936146537867	3.26214844942983	0.046	0	1	ESMs	Scissor_pos_VS_Scissor_neg
KWMTBOMO16222	0.0644532420977961	3.25873196289926	0.186	0.1	1	ESMs	Scissor_pos_VS_Scissor_neg
KWMTBOMO14656	0.119361457094322	3.25693248709587	0.046	0	1	ESMs	Scissor_pos_VS_Scissor_neg
KWMTBOMO01836	0.137913719002478	3.25658505891405	0.042	0	1	ESMs	Scissor_pos_VS_Scissor_neg
KWMTBOMO01942	0.0896748532407655	3.24772494848121	0.055	0	1	ESMs	Scissor_pos_VS_Scissor_neg
KWMTBOMO10494	0.207846216783422	3.24590313430303	0.111	0.06	1	ESMs	Scissor_pos_VS_Scissor_neg
KWMTBOMO10550	0.133005705762631	3.2398528807122	0.043	0	1	ESMs	Scissor_pos_VS_Scissor_neg
KWMTBOMO01255	0.00764893977837079	3.22601773601414	0.228	0.08	1	ESMs	Scissor_pos_VS_Scissor_neg
KWMTBOMO12276	0.0712200638871191	3.22478653753736	0.219	0.14	1	ESMs	Scissor_pos_VS_Scissor_neg
KWMTBOMO09688	0.227080266315457	3.2205584861498	0.107	0.06	1	ESMs	Scissor_pos_VS_Scissor_neg
KWMTBOMO16083	0.143015428292106	3.21944778476119	0.041	0	1	ESMs	Scissor_pos_VS_Scissor_neg
KWMTBOMO10529	0.171763654047292	3.20995159926298	0.036	0	1	ESMs	Scissor_pos_VS_Scissor_neg
KWMTBOMO08371	0.123737362873254	3.20939800099018	0.045	0	1	ESMs	Scissor_pos_VS_Scissor_neg
KWMTBOMO01049	0.110009979218475	3.20917824752109	0.13	0.06	1	ESMs	Scissor_pos_VS_Scissor_neg
KWMTBOMO15943	1.87129763476105e-05	3.20422151402693	0.443	0.18	0.315875040747665	ESMs	Scissor_pos_VS_Scissor_neg
KWMTBOMO07702	0.148319806897902	3.18703226757662	0.04	0	1	ESMs	Scissor_pos_VS_Scissor_neg
KWMTBOMO01880	0.350298687177292	3.17997430361797	0.048	0.02	1	ESMs	Scissor_pos_VS_Scissor_neg
KWMTBOMO04441	0.192006900604445	3.17454069203554	0.033	0	1	ESMs	Scissor_pos_VS_Scissor_neg
KWMTBOMO16320	6.95265143159422e-07	3.17426273000203	0.447	0.1	0.011736075616531	ESMs	Scissor_pos_VS_Scissor_neg
KWMTBOMO05582	0.046921635713241	3.17126128781321	0.197	0.1	1	ESMs	Scissor_pos_VS_Scissor_neg
KWMTBOMO08501	0.193485864167536	3.16853345712927	0.113	0.06	1	ESMs	Scissor_pos_VS_Scissor_neg
KWMTBOMO09528	0.0168775153852845	3.16801239217622	0.162	0.04	1	ESMs	Scissor_pos_VS_Scissor_neg
KWMTBOMO14303	0.281707389727377	3.16286704416654	0.079	0.04	1	ESMs	Scissor_pos_VS_Scissor_neg
KWMTBOMO10133	0.344885533081135	3.1515961437181	0.152	0.12	1	ESMs	Scissor_pos_VS_Scissor_neg
KWMTBOMO05423	0.122698329591066	3.15063643602819	0.077	0.02	1	ESMs	Scissor_pos_VS_Scissor_neg
KWMTBOMO15739	0.27084228958364	3.15003548472709	0.055	0.02	1	ESMs	Scissor_pos_VS_Scissor_neg
KWMTBOMO00906	0.481493891914636	3.14727490161711	0.062	0.04	1	ESMs	Scissor_pos_VS_Scissor_neg
KWMTBOMO05418	0.209949907253084	3.14346667110446	0.062	0.02	1	ESMs	Scissor_pos_VS_Scissor_neg
KWMTBOMO09996	0.143015428292106	3.13342662936305	0.041	0	1	ESMs	Scissor_pos_VS_Scissor_neg
KWMTBOMO10864	0.143015428292106	3.12588841302816	0.041	0	1	ESMs	Scissor_pos_VS_Scissor_neg
KWMTBOMO10358	0.108377498180028	3.12492109253886	0.189	0.12	1	ESMs	Scissor_pos_VS_Scissor_neg
KWMTBOMO15302	0.473748502730115	3.12318982448319	0.084	0.06	1	ESMs	Scissor_pos_VS_Scissor_neg
KWMTBOMO09558	0.27084228958364	3.11932360596728	0.055	0.02	1	ESMs	Scissor_pos_VS_Scissor_neg
KWMTBOMO02770	0.391563355000482	3.11805113388257	0.044	0.02	1	ESMs	Scissor_pos_VS_Scissor_neg
KWMTBOMO11832	0.350298687177292	3.11350294485264	0.048	0.02	1	ESMs	Scissor_pos_VS_Scissor_neg
KWMTBOMO14940	0.22575086107522	3.11267834396824	0.06	0.02	1	ESMs	Scissor_pos_VS_Scissor_neg
KWMTBOMO16312	0.199579940540584	3.10240782347348	0.089	0.04	1	ESMs	Scissor_pos_VS_Scissor_neg
KWMTBOMO09443	0.157668135717884	3.10170817152017	0.096	0.04	1	ESMs	Scissor_pos_VS_Scissor_neg
KWMTBOMO02824	0.199579940540584	3.09232486328352	0.089	0.04	1	ESMs	Scissor_pos_VS_Scissor_neg
KWMTBOMO15734	0.153836375339528	3.09198816876482	0.039	0	1	ESMs	Scissor_pos_VS_Scissor_neg
KWMTBOMO13947	0.234104490036405	3.08752329780546	0.059	0.02	1	ESMs	Scissor_pos_VS_Scissor_neg
KWMTBOMO04682	1.22464920934918e-07	3.08286938780896	0.464	0.06	0.00206720786538142	ESMs	Scissor_pos_VS_Scissor_neg
KWMTBOMO04750	0.394238697271165	3.08250791549714	0.068	0.04	1	ESMs	Scissor_pos_VS_Scissor_neg
KWMTBOMO15999	0.0399276838896381	3.07877121142775	0.252	0.16	1	ESMs	Scissor_pos_VS_Scissor_neg
KWMTBOMO12787	0.229864368587849	3.06876702371841	0.085	0.04	1	ESMs	Scissor_pos_VS_Scissor_neg
KWMTBOMO15524	0.137913719002478	3.06768564157649	0.042	0	1	ESMs	Scissor_pos_VS_Scissor_neg
KWMTBOMO00994	0.153836375339528	3.06745533654562	0.039	0	1	ESMs	Scissor_pos_VS_Scissor_neg
KWMTBOMO01608	0.313607635843987	3.0584693253644	0.051	0.02	1	ESMs	Scissor_pos_VS_Scissor_neg
KWMTBOMO14326	0.472346269735821	3.0561414537526	0.039	0.02	1	ESMs	Scissor_pos_VS_Scissor_neg
KWMTBOMO05260	0.481493891914636	3.05558581556871	0.062	0.04	1	ESMs	Scissor_pos_VS_Scissor_neg
KWMTBOMO05220	0.168745379180325	3.04902827395365	0.157	0.1	1	ESMs	Scissor_pos_VS_Scissor_neg
KWMTBOMO09431	0.209949907253084	3.04363421011174	0.062	0.02	1	ESMs	Scissor_pos_VS_Scissor_neg
KWMTBOMO13799	0.234104490036405	3.04006643356246	0.059	0.02	1	ESMs	Scissor_pos_VS_Scissor_neg
KWMTBOMO02277	0.22575086107522	3.03884170845006	0.06	0.02	1	ESMs	Scissor_pos_VS_Scissor_neg
KWMTBOMO09045	0.189162366230426	3.03442930639921	0.154	0.1	1	ESMs	Scissor_pos_VS_Scissor_neg
KWMTBOMO13342	0.148319806897902	3.02949091764367	0.04	0	1	ESMs	Scissor_pos_VS_Scissor_neg
KWMTBOMO02407	0.171763654047292	3.0272249960421	0.036	0	1	ESMs	Scissor_pos_VS_Scissor_neg
KWMTBOMO13810	0.0863335618265098	3.01964325784536	0.088	0.02	1	ESMs	Scissor_pos_VS_Scissor_neg
KWMTBOMO04553	0.165547185936704	3.01383837570625	0.037	0	1	ESMs	Scissor_pos_VS_Scissor_neg
KWMTBOMO13413	0.356449168581739	3.01066694674705	0.071	0.04	1	ESMs	Scissor_pos_VS_Scissor_neg
KWMTBOMO15681	0.407658789665452	3.01051966757912	0.067	0.04	1	ESMs	Scissor_pos_VS_Scissor_neg
KWMTBOMO00973	0.305395789028594	3.00788242105681	0.021	0	1	ESMs	Scissor_pos_VS_Scissor_neg
KWMTBOMO12691	0.504195221217295	3.00771929657296	0.082	0.06	1	ESMs	Scissor_pos_VS_Scissor_neg
KWMTBOMO15221	0.272041228184242	3.00646169657782	0.177	0.14	1	ESMs	Scissor_pos_VS_Scissor_neg
KWMTBOMO12115	0.137913719002478	3.00137424565321	0.042	0	1	ESMs	Scissor_pos_VS_Scissor_neg
KWMTBOMO06421	0.359369673302538	2.99721425190743	0.071	0.04	1	ESMs	Scissor_pos_VS_Scissor_neg
KWMTBOMO00713	0.152301574494095	2.99238438636274	0.071	0.02	1	ESMs	Scissor_pos_VS_Scissor_neg
KWMTBOMO12931	0.127468731736329	2.98912835532824	0.076	0.02	1	ESMs	Scissor_pos_VS_Scissor_neg
KWMTBOMO05451	0.09292292719981	2.96986668747518	0.054	0	1	ESMs	Scissor_pos_VS_Scissor_neg
KWMTBOMO13518	0.183806463715788	2.96822132330262	0.092	0.04	1	ESMs	Scissor_pos_VS_Scissor_neg
KWMTBOMO11026	0.23284341799228	2.95526836188621	0.147	0.1	1	ESMs	Scissor_pos_VS_Scissor_neg
KWMTBOMO01831	0.626215493493919	2.95108676494783	0.054	0.04	1	ESMs	Scissor_pos_VS_Scissor_neg
KWMTBOMO12517	0.0170513833710466	2.95060771331203	0.225	0.1	1	ESMs	Scissor_pos_VS_Scissor_neg
KWMTBOMO08611	0.472346269735821	2.94847127227087	0.039	0.02	1	ESMs	Scissor_pos_VS_Scissor_neg
KWMTBOMO03402	0.350278687033576	2.94736962364449	0.094	0.06	1	ESMs	Scissor_pos_VS_Scissor_neg
KWMTBOMO05770	0.322657721713787	2.94193625389473	0.074	0.04	1	ESMs	Scissor_pos_VS_Scissor_neg
KWMTBOMO15122	0.115148063133933	2.94141593169741	0.048	0	1	ESMs	Scissor_pos_VS_Scissor_neg
KWMTBOMO03609	0.123737362873254	2.93713185433812	0.045	0	1	ESMs	Scissor_pos_VS_Scissor_neg
KWMTBOMO16465	0.137913719002478	2.9358543008915	0.042	0	1	ESMs	Scissor_pos_VS_Scissor_neg
KWMTBOMO04644	2.49194426975508e-08	2.93493671104823	0.478	0.06	0.000420640192734657	ESMs	Scissor_pos_VS_Scissor_neg
KWMTBOMO02949	0.153836375339528	2.93176147627673	0.039	0	1	ESMs	Scissor_pos_VS_Scissor_neg
KWMTBOMO00627	0.376344045328654	2.92881532478236	0.165	0.14	1	ESMs	Scissor_pos_VS_Scissor_neg
KWMTBOMO10218	0.337589712554376	2.92517987949695	0.049	0.02	1	ESMs	Scissor_pos_VS_Scissor_neg
KWMTBOMO08059	0.291998819828589	2.92353026174359	0.053	0.02	1	ESMs	Scissor_pos_VS_Scissor_neg
KWMTBOMO04429	0.349257084153866	2.91218476598897	0.151	0.12	1	ESMs	Scissor_pos_VS_Scissor_neg
KWMTBOMO00067	0.699371596545868	2.91098910505151	0.089	0.08	1	ESMs	Scissor_pos_VS_Scissor_neg
KWMTBOMO04283	0.344637095047961	2.9071390664105	0.072	0.04	1	ESMs	Scissor_pos_VS_Scissor_neg
KWMTBOMO03312	6.86809112254171e-18	2.90611954604252	0.899	0.58	1.15933378148504e-13	ESMs	Scissor_pos_VS_Scissor_neg
KWMTBOMO01243	0.288609915449069	2.90468782115995	0.1	0.06	1	ESMs	Scissor_pos_VS_Scissor_neg
KWMTBOMO15754	0.568603569499049	2.90422870606591	0.057	0.04	1	ESMs	Scissor_pos_VS_Scissor_neg
KWMTBOMO09007	0.350298687177292	2.90261739739775	0.048	0.02	1	ESMs	Scissor_pos_VS_Scissor_neg
KWMTBOMO15255	0.128282920572593	2.89924240744042	0.044	0	1	ESMs	Scissor_pos_VS_Scissor_neg
KWMTBOMO16235	0.350298687177292	2.89881534098958	0.048	0.02	1	ESMs	Scissor_pos_VS_Scissor_neg
KWMTBOMO04547	0.862961145858959	2.89330027122847	0.068	0.08	1	ESMs	Scissor_pos_VS_Scissor_neg
KWMTBOMO16237	1.2540464674956e-05	2.8860268592262	0.408	0.1	0.211683043713257	ESMs	Scissor_pos_VS_Scissor_neg
KWMTBOMO03149	0.165547185936704	2.87482776684712	0.037	0	1	ESMs	Scissor_pos_VS_Scissor_neg
KWMTBOMO08529	0.801975648855416	2.87474293383365	0.065	0.06	1	ESMs	Scissor_pos_VS_Scissor_neg
KWMTBOMO12915	0.350298687177292	2.8739354377125	0.048	0.02	1	ESMs	Scissor_pos_VS_Scissor_neg
KWMTBOMO06299	0.143015428292106	2.86953	0.041	0	1	ESMs	Scissor_pos_VS_Scissor_neg
KWMTBOMO11041	0.472346269735821	2.86819285300096	0.039	0.02	1	ESMs	Scissor_pos_VS_Scissor_neg
KWMTBOMO04912	0.325366269291637	2.86339539989438	0.05	0.02	1	ESMs	Scissor_pos_VS_Scissor_neg
KWMTBOMO11991	0.148319806897902	2.85877864904985	0.04	0	1	ESMs	Scissor_pos_VS_Scissor_neg
KWMTBOMO08658	0.709075710636354	2.85481234327815	0.093	0.12	1	ESMs	Scissor_pos_VS_Scissor_neg
KWMTBOMO08412	0.00578486241991167	2.85227869092444	0.194	0.04	1	ESMs	Scissor_pos_VS_Scissor_neg
KWMTBOMO00617	0.550024807719714	2.84966652378885	0.035	0.02	1	ESMs	Scissor_pos_VS_Scissor_neg
KWMTBOMO08698	0.677266491807566	2.84741483592625	0.071	0.06	1	ESMs	Scissor_pos_VS_Scissor_neg
KWMTBOMO13998	0.137913719002478	2.84349014057124	0.042	0	1	ESMs	Scissor_pos_VS_Scissor_neg
KWMTBOMO00437	0.758287936998276	2.84341068689851	0.067	0.06	1	ESMs	Scissor_pos_VS_Scissor_neg
KWMTBOMO15781	0.123449394722027	2.83705443441312	0.205	0.14	1	ESMs	Scissor_pos_VS_Scissor_neg
KWMTBOMO16870	0.165547185936704	2.83157304611758	0.037	0	1	ESMs	Scissor_pos_VS_Scissor_neg
KWMTBOMO03790	0.179925860147153	2.83049982493562	0.156	0.1	1	ESMs	Scissor_pos_VS_Scissor_neg
KWMTBOMO14373	0.424989963234045	2.82986748110082	0.107	0.08	1	ESMs	Scissor_pos_VS_Scissor_neg
KWMTBOMO09630	0.206973567752919	2.82659456033393	0.031	0	1	ESMs	Scissor_pos_VS_Scissor_neg
KWMTBOMO08117	0.252298157246216	2.82252285342977	0.057	0.02	1	ESMs	Scissor_pos_VS_Scissor_neg
KWMTBOMO13448	0.369245011524097	2.82209228152709	0.07	0.04	1	ESMs	Scissor_pos_VS_Scissor_neg
KWMTBOMO05981	0.472346269735821	2.81619906088782	0.039	0.02	1	ESMs	Scissor_pos_VS_Scissor_neg
KWMTBOMO09283	0.0064049890890824	2.81508193828828	0.192	0.04	1	ESMs	Scissor_pos_VS_Scissor_neg
KWMTBOMO00521	0.171763654047292	2.81086010933314	0.036	0	1	ESMs	Scissor_pos_VS_Scissor_neg
KWMTBOMO03415	0.232452542517099	2.81062509199704	0.214	0.18	1	ESMs	Scissor_pos_VS_Scissor_neg
KWMTBOMO01147	0.335808763337803	2.80938278270446	0.116	0.08	1	ESMs	Scissor_pos_VS_Scissor_neg
KWMTBOMO04639	0.143015428292106	2.80838763624574	0.041	0	1	ESMs	Scissor_pos_VS_Scissor_neg
KWMTBOMO08483	0.438061104512019	2.80790025759271	0.041	0.02	1	ESMs	Scissor_pos_VS_Scissor_neg
KWMTBOMO01024	0.52937127253551	2.80645092111734	0.036	0.02	1	ESMs	Scissor_pos_VS_Scissor_neg
KWMTBOMO03217	0.712749611076732	2.80324376103247	0.05	0.04	1	ESMs	Scissor_pos_VS_Scissor_neg
KWMTBOMO15802	0.241057894251567	2.79395278328866	0.027	0	1	ESMs	Scissor_pos_VS_Scissor_neg
KWMTBOMO14030	0.171763654047292	2.78786762876724	0.036	0	1	ESMs	Scissor_pos_VS_Scissor_neg
KWMTBOMO15659	0.322121854039579	2.78774803029498	0.074	0.04	1	ESMs	Scissor_pos_VS_Scissor_neg
KWMTBOMO12029	0.369245004449378	2.7875361323022	0.07	0.04	1	ESMs	Scissor_pos_VS_Scissor_neg
KWMTBOMO12932	0.515974872224996	2.78273176258923	0.06	0.04	1	ESMs	Scissor_pos_VS_Scissor_neg
KWMTBOMO11304	0.629280897428192	2.78056803469195	0.093	0.08	1	ESMs	Scissor_pos_VS_Scissor_neg
KWMTBOMO08952	0.669041051964019	2.77904495791238	0.108	0.1	1	ESMs	Scissor_pos_VS_Scissor_neg
KWMTBOMO00985	0.3142406216396	2.77822918574848	0.051	0.02	1	ESMs	Scissor_pos_VS_Scissor_neg
KWMTBOMO00716	0.325366269291637	2.77670163028438	0.05	0.02	1	ESMs	Scissor_pos_VS_Scissor_neg
KWMTBOMO02863	0.123737362873254	2.77061981361189	0.045	0	1	ESMs	Scissor_pos_VS_Scissor_neg
KWMTBOMO08469	0.475971142639319	2.76746338579192	0.103	0.08	1	ESMs	Scissor_pos_VS_Scissor_neg
KWMTBOMO15429	0.206973582798877	2.76523730612322	0.031	0	1	ESMs	Scissor_pos_VS_Scissor_neg
KWMTBOMO04640	0.391563355000482	2.76369605793635	0.044	0.02	1	ESMs	Scissor_pos_VS_Scissor_neg
KWMTBOMO14854	0.265404402533364	2.76066670001153	0.081	0.04	1	ESMs	Scissor_pos_VS_Scissor_neg
KWMTBOMO15259	0.504195215773174	2.75215526948582	0.082	0.06	1	ESMs	Scissor_pos_VS_Scissor_neg
KWMTBOMO08196	0.579964259644276	2.75165208630428	0.115	0.1	1	ESMs	Scissor_pos_VS_Scissor_neg
KWMTBOMO04536	3.40174715331961e-05	2.75160033682708	0.438	0.18	0.57421491948035	ESMs	Scissor_pos_VS_Scissor_neg
KWMTBOMO04797	0.137913719002478	2.75139435449612	0.042	0	1	ESMs	Scissor_pos_VS_Scissor_neg
KWMTBOMO11322	0.626215493493919	2.74364032790797	0.054	0.04	1	ESMs	Scissor_pos_VS_Scissor_neg
KWMTBOMO15206	0.546231570750268	2.74338986496902	0.117	0.1	1	ESMs	Scissor_pos_VS_Scissor_neg
KWMTBOMO07720	0.178236887988949	2.73621515210111	0.035	0	1	ESMs	Scissor_pos_VS_Scissor_neg
KWMTBOMO16470	0.349266382977138	2.73376737760489	0.094	0.06	1	ESMs	Scissor_pos_VS_Scissor_neg
KWMTBOMO16461	0.438061115738728	2.73251846227736	0.041	0.02	1	ESMs	Scissor_pos_VS_Scissor_neg
KWMTBOMO14685	0.66322450815439	2.7296323837567	0.126	0.12	1	ESMs	Scissor_pos_VS_Scissor_neg
KWMTBOMO11014	0.757161107752803	2.72787461633452	0.048	0.06	1	ESMs	Scissor_pos_VS_Scissor_neg
KWMTBOMO03950	0.350298687177292	2.72595891950653	0.048	0.02	1	ESMs	Scissor_pos_VS_Scissor_neg
KWMTBOMO14013	0.52937127253551	2.7256499998884	0.036	0.02	1	ESMs	Scissor_pos_VS_Scissor_neg
KWMTBOMO00907	0.694452857352678	2.72092868050183	0.029	0.02	1	ESMs	Scissor_pos_VS_Scissor_neg
KWMTBOMO08253	0.223271527680344	2.72054790565029	0.029	0	1	ESMs	Scissor_pos_VS_Scissor_neg
KWMTBOMO05435	0.716452890596455	2.71864410691194	0.069	0.06	1	ESMs	Scissor_pos_VS_Scissor_neg
KWMTBOMO11717	0.421510928077572	2.71846648565749	0.066	0.04	1	ESMs	Scissor_pos_VS_Scissor_neg
KWMTBOMO10467	0.75983031292718	2.71633445680841	0.086	0.08	1	ESMs	Scissor_pos_VS_Scissor_neg
KWMTBOMO08703	0.623689461691266	2.71555116942078	0.074	0.06	1	ESMs	Scissor_pos_VS_Scissor_neg
KWMTBOMO03307	0.184979967564075	2.71401928265127	0.034	0	1	ESMs	Scissor_pos_VS_Scissor_neg
KWMTBOMO06495	0.165547185936704	2.71147592426627	0.037	0	1	ESMs	Scissor_pos_VS_Scissor_neg
KWMTBOMO06892	0.260518216438139	2.70321228443118	0.025	0	1	ESMs	Scissor_pos_VS_Scissor_neg
KWMTBOMO11677	0.241057894251567	2.70209248297869	0.027	0	1	ESMs	Scissor_pos_VS_Scissor_neg
KWMTBOMO00460	0.446113958557023	2.70104772801527	0.086	0.06	1	ESMs	Scissor_pos_VS_Scissor_neg
KWMTBOMO16126	4.06512388461428e-12	2.69905604207373	0.682	0.18	6.86192911722891e-08	ESMs	Scissor_pos_VS_Scissor_neg
KWMTBOMO16318	0.64689942548652	2.69778582657208	0.053	0.04	1	ESMs	Scissor_pos_VS_Scissor_neg
KWMTBOMO03179	0.15957524812669	2.6933175643524	0.038	0	1	ESMs	Scissor_pos_VS_Scissor_neg
KWMTBOMO05712	0.86019837502086	2.68854087958188	0.081	0.08	1	ESMs	Scissor_pos_VS_Scissor_neg
KWMTBOMO07535	0.171763654047292	2.68773982147897	0.036	0	1	ESMs	Scissor_pos_VS_Scissor_neg
KWMTBOMO04867	0.712749611076732	2.68637698456144	0.05	0.04	1	ESMs	Scissor_pos_VS_Scissor_neg
KWMTBOMO11261	0.676454615223716	2.67753890258561	0.071	0.06	1	ESMs	Scissor_pos_VS_Scissor_neg
KWMTBOMO03521	0.759951757513116	2.67691575581578	0.048	0.04	1	ESMs	Scissor_pos_VS_Scissor_neg
KWMTBOMO03870	0.35464435075257	2.67177141802052	0.184	0.16	1	ESMs	Scissor_pos_VS_Scissor_neg
KWMTBOMO11892	0.900716553055334	2.66837142765245	0.102	0.12	1	ESMs	Scissor_pos_VS_Scissor_neg
KWMTBOMO09227	0.223271511281534	2.66691282424787	0.029	0	1	ESMs	Scissor_pos_VS_Scissor_neg
KWMTBOMO04196	0.231967808144956	2.66677183484221	0.028	0	1	ESMs	Scissor_pos_VS_Scissor_neg
KWMTBOMO12521	0.359238921779933	2.66579679046019	0.132	0.1	1	ESMs	Scissor_pos_VS_Scissor_neg
KWMTBOMO11653	0.497698827641053	2.66510347041492	0.061	0.04	1	ESMs	Scissor_pos_VS_Scissor_neg
KWMTBOMO08722	0.143015428292106	2.66422038000654	0.041	0	1	ESMs	Scissor_pos_VS_Scissor_neg
KWMTBOMO06551	0.223271527680344	2.66250159594585	0.029	0	1	ESMs	Scissor_pos_VS_Scissor_neg
KWMTBOMO10326	0.363515039394166	2.65892214032644	0.046	0.02	1	ESMs	Scissor_pos_VS_Scissor_neg
KWMTBOMO10588	0.550024807719714	2.65199835230132	0.035	0.02	1	ESMs	Scissor_pos_VS_Scissor_neg
KWMTBOMO08318	0.920442525746097	2.65115048447843	0.022	0.02	1	ESMs	Scissor_pos_VS_Scissor_neg
KWMTBOMO09529	0.210386253513495	2.64827932144429	0.062	0.02	1	ESMs	Scissor_pos_VS_Scissor_neg
KWMTBOMO10018	0.184979967564075	2.64751731996538	0.034	0	1	ESMs	Scissor_pos_VS_Scissor_neg
KWMTBOMO02777	0.586662166426173	2.64573607028489	0.056	0.04	1	ESMs	Scissor_pos_VS_Scissor_neg
KWMTBOMO07926	0.617535299732801	2.64517810126843	0.032	0.02	1	ESMs	Scissor_pos_VS_Scissor_neg
KWMTBOMO01575	0.798335507294728	2.64470642861887	0.084	0.08	1	ESMs	Scissor_pos_VS_Scissor_neg
KWMTBOMO04430	0.515194347364275	2.64176694689866	0.06	0.04	1	ESMs	Scissor_pos_VS_Scissor_neg
KWMTBOMO10140	0.498459389045983	2.64169683012029	0.061	0.04	1	ESMs	Scissor_pos_VS_Scissor_neg
KWMTBOMO01418	0.690152588361574	2.63670646280067	0.051	0.04	1	ESMs	Scissor_pos_VS_Scissor_neg
KWMTBOMO14311	0.531654521151751	2.63636	0.059	0.04	1	ESMs	Scissor_pos_VS_Scissor_neg
KWMTBOMO10957	0.78213486154652	2.63416882766515	0.151	0.16	1	ESMs	Scissor_pos_VS_Scissor_neg
KWMTBOMO11258	0.252815804111077	2.63207009328158	0.057	0.02	1	ESMs	Scissor_pos_VS_Scissor_neg
KWMTBOMO12241	0.549433085301841	2.63155745472654	0.058	0.04	1	ESMs	Scissor_pos_VS_Scissor_neg
KWMTBOMO01194	0.699599286419438	2.6300432876954	0.124	0.12	1	ESMs	Scissor_pos_VS_Scissor_neg
KWMTBOMO11882	0.626215493493919	2.62872605005795	0.054	0.04	1	ESMs	Scissor_pos_VS_Scissor_neg
KWMTBOMO10399	0.666517405760724	2.6258216211404	0.091	0.08	1	ESMs	Scissor_pos_VS_Scissor_neg
KWMTBOMO10746	0.483720131583856	2.62404918850207	0.062	0.04	1	ESMs	Scissor_pos_VS_Scissor_neg
KWMTBOMO16077	0.758287936998276	2.62203125565857	0.067	0.06	1	ESMs	Scissor_pos_VS_Scissor_neg
KWMTBOMO10570	0.214946913377228	2.61931063799575	0.03	0	1	ESMs	Scissor_pos_VS_Scissor_neg
KWMTBOMO05909	0.796747883107356	2.61662653600605	0.084	0.08	1	ESMs	Scissor_pos_VS_Scissor_neg
KWMTBOMO03865	0.759951752608065	2.61495615028632	0.048	0.04	1	ESMs	Scissor_pos_VS_Scissor_neg
KWMTBOMO10964	0.421935026774264	2.61471966971786	0.042	0.02	1	ESMs	Scissor_pos_VS_Scissor_neg
KWMTBOMO11089	0.0635584750460617	2.61438987897214	0.283	0.22	1	ESMs	Scissor_pos_VS_Scissor_neg
KWMTBOMO14125	0.628016612392436	2.61107086422754	0.054	0.04	1	ESMs	Scissor_pos_VS_Scissor_neg
KWMTBOMO04044	0.366446651249992	2.61088372248762	0.167	0.14	1	ESMs	Scissor_pos_VS_Scissor_neg
KWMTBOMO01278	0.690152588361574	2.60850013866184	0.051	0.04	1	ESMs	Scissor_pos_VS_Scissor_neg
KWMTBOMO05752	0.472346269735821	2.60498460971345	0.039	0.02	1	ESMs	Scissor_pos_VS_Scissor_neg
KWMTBOMO02687	0.364239158714081	2.6017125440914	0.046	0.02	1	ESMs	Scissor_pos_VS_Scissor_neg
KWMTBOMO02649	0.0400968507922508	2.60002273233033	0.257	0.16	1	ESMs	Scissor_pos_VS_Scissor_neg
KWMTBOMO08194	0.438061104512019	2.59938719904903	0.041	0.02	1	ESMs	Scissor_pos_VS_Scissor_neg
KWMTBOMO16206	0.251781266916866	2.59901016605812	0.057	0.02	1	ESMs	Scissor_pos_VS_Scissor_neg
KWMTBOMO03177	1.48783987881021e-05	2.59700368599477	0.471	0.2	0.251147371543164	ESMs	Scissor_pos_VS_Scissor_neg
KWMTBOMO10866	0.313607635843987	2.59641703545405	0.051	0.02	1	ESMs	Scissor_pos_VS_Scissor_neg
KWMTBOMO16477	0.273203676447671	2.59133	0.08	0.04	1	ESMs	Scissor_pos_VS_Scissor_neg
KWMTBOMO08048	0.712749611076732	2.58885491511422	0.05	0.04	1	ESMs	Scissor_pos_VS_Scissor_neg
KWMTBOMO03231	0.780339997283279	2.58640444126165	0.066	0.06	1	ESMs	Scissor_pos_VS_Scissor_neg
KWMTBOMO04554	0.397740802120914	2.58356456415634	0.147	0.12	1	ESMs	Scissor_pos_VS_Scissor_neg
KWMTBOMO07892	0.206973582798877	2.5828337348383	0.031	0	1	ESMs	Scissor_pos_VS_Scissor_neg
KWMTBOMO04202	0.864135035774653	2.58079418388624	0.034	0.04	1	ESMs	Scissor_pos_VS_Scissor_neg
KWMTBOMO13944	0.523790723588228	2.5807377786672	0.081	0.06	1	ESMs	Scissor_pos_VS_Scissor_neg
KWMTBOMO11005	0.00712521701336774	2.58013282422151	0.347	0.22	1	ESMs	Scissor_pos_VS_Scissor_neg
KWMTBOMO07405	0.231967808144956	2.58010350939987	0.028	0	1	ESMs	Scissor_pos_VS_Scissor_neg
KWMTBOMO03939	0.736011651864333	2.57974826984816	0.049	0.04	1	ESMs	Scissor_pos_VS_Scissor_neg
KWMTBOMO05204	0.911413662243934	2.57277960904429	0.087	0.1	1	ESMs	Scissor_pos_VS_Scissor_neg
KWMTBOMO07359	0.862732307093715	2.57232825385125	0.043	0.04	1	ESMs	Scissor_pos_VS_Scissor_neg
KWMTBOMO01871	0.178236875249988	2.57149895173267	0.035	0	1	ESMs	Scissor_pos_VS_Scissor_neg
KWMTBOMO08915	0.642054783143874	2.56629301238851	0.031	0.02	1	ESMs	Scissor_pos_VS_Scissor_neg
KWMTBOMO16054	0.00593582493477664	2.56599020472572	0.218	0.06	1	ESMs	Scissor_pos_VS_Scissor_neg
KWMTBOMO16396	0.969393146627876	2.56540424090531	0.058	0.06	1	ESMs	Scissor_pos_VS_Scissor_neg
KWMTBOMO01043	0.184979967564075	2.55946203105643	0.034	0	1	ESMs	Scissor_pos_VS_Scissor_neg
KWMTBOMO05284	0.250565907555311	2.55834009740809	0.026	0	1	ESMs	Scissor_pos_VS_Scissor_neg
KWMTBOMO02386	0.688294203657856	2.55430988417907	0.107	0.1	1	ESMs	Scissor_pos_VS_Scissor_neg
KWMTBOMO04093	0.876103628464628	2.55261122849182	0.117	0.14	1	ESMs	Scissor_pos_VS_Scissor_neg
KWMTBOMO00656	0.490571891079366	2.54977917849075	0.038	0.02	1	ESMs	Scissor_pos_VS_Scissor_neg
KWMTBOMO13794	0.41615993895112	2.54923720526998	0.067	0.04	1	ESMs	Scissor_pos_VS_Scissor_neg
KWMTBOMO16364	0.64689942548652	2.54913949476302	0.053	0.04	1	ESMs	Scissor_pos_VS_Scissor_neg
KWMTBOMO02135	0.901456441985518	2.54829603376392	0.102	0.12	1	ESMs	Scissor_pos_VS_Scissor_neg
KWMTBOMO03118	0.434925747780327	2.54799487985014	0.087	0.06	1	ESMs	Scissor_pos_VS_Scissor_neg
KWMTBOMO11236	0.184979967564075	2.5440462645772	0.034	0	1	ESMs	Scissor_pos_VS_Scissor_neg
KWMTBOMO05816	0.421935026774264	2.53985599069334	0.042	0.02	1	ESMs	Scissor_pos_VS_Scissor_neg
KWMTBOMO15792	0.0040456347858508	2.53804732885667	0.249	0.08	1	ESMs	Scissor_pos_VS_Scissor_neg
KWMTBOMO07555	0.676454610830022	2.53790797062096	0.071	0.06	1	ESMs	Scissor_pos_VS_Scissor_neg
KWMTBOMO16204	0.848438441396055	2.5302621343606	0.063	0.06	1	ESMs	Scissor_pos_VS_Scissor_neg
KWMTBOMO16371	0.549433085301841	2.52847100261984	0.058	0.04	1	ESMs	Scissor_pos_VS_Scissor_neg
KWMTBOMO01219	0.206973582798877	2.52709555557498	0.031	0	1	ESMs	Scissor_pos_VS_Scissor_neg
KWMTBOMO01591	0.260518216438139	2.52452323775564	0.025	0	1	ESMs	Scissor_pos_VS_Scissor_neg
KWMTBOMO00881	0.0797027531859145	2.52338985843972	0.282	0.22	1	ESMs	Scissor_pos_VS_Scissor_neg
KWMTBOMO06568	0.15957524812669	2.52200359081098	0.038	0	1	ESMs	Scissor_pos_VS_Scissor_neg
KWMTBOMO09128	0.617535299732801	2.51448511211181	0.032	0.02	1	ESMs	Scissor_pos_VS_Scissor_neg
KWMTBOMO03585	0.334342185935297	2.51373309502698	0.218	0.2	1	ESMs	Scissor_pos_VS_Scissor_neg
KWMTBOMO13925	0.00538237908267426	2.51247118195486	0.316	0.16	1	ESMs	Scissor_pos_VS_Scissor_neg
KWMTBOMO01167	0.391563344152059	2.5103363796729	0.044	0.02	1	ESMs	Scissor_pos_VS_Scissor_neg
KWMTBOMO00545	8.73792080101347e-05	2.50859	0.468	0.26	1	ESMs	Scissor_pos_VS_Scissor_neg
KWMTBOMO06573	0.619152201832315	2.50523888740715	0.094	0.08	1	ESMs	Scissor_pos_VS_Scissor_neg
KWMTBOMO04710	0.494672865276976	2.50055452814031	0.102	0.08	1	ESMs	Scissor_pos_VS_Scissor_neg
KWMTBOMO14363	0.982907180848417	2.49972010280526	0.108	0.12	1	ESMs	Scissor_pos_VS_Scissor_neg
KWMTBOMO12019	0.250565907555311	2.49636268793952	0.026	0	1	ESMs	Scissor_pos_VS_Scissor_neg
KWMTBOMO08495	0.206973582798877	2.49520778234776	0.031	0	1	ESMs	Scissor_pos_VS_Scissor_neg
KWMTBOMO06866	0.52937127253551	2.49235807875424	0.036	0.02	1	ESMs	Scissor_pos_VS_Scissor_neg
KWMTBOMO11126	0.199332718115395	2.49209974400273	0.032	0	1	ESMs	Scissor_pos_VS_Scissor_neg
KWMTBOMO04939	0.5095673394245	2.49173749958859	0.037	0.02	1	ESMs	Scissor_pos_VS_Scissor_neg
KWMTBOMO06937	0.184979967564075	2.4851479537615	0.034	0	1	ESMs	Scissor_pos_VS_Scissor_neg
KWMTBOMO03900	0.029554552245972	2.4840658984083	0.36	0.3	1	ESMs	Scissor_pos_VS_Scissor_neg
KWMTBOMO10286	0.281874370217714	2.48367439122612	0.023	0	1	ESMs	Scissor_pos_VS_Scissor_neg
KWMTBOMO06606	0.000132700530132892	2.48319644516745	0.322	0.06	1	ESMs	Scissor_pos_VS_Scissor_neg
KWMTBOMO07762	0.490571891079366	2.47769066650112	0.038	0.02	1	ESMs	Scissor_pos_VS_Scissor_neg
KWMTBOMO03940	0.422178803502014	2.47692189804774	0.066	0.04	1	ESMs	Scissor_pos_VS_Scissor_neg
KWMTBOMO16543	0.835962165454042	2.47663048180657	0.044	0.04	1	ESMs	Scissor_pos_VS_Scissor_neg
KWMTBOMO16061	0.520041724937236	2.47463034237168	0.1	0.08	1	ESMs	Scissor_pos_VS_Scissor_neg
KWMTBOMO09744	0.898937210109635	2.47348158919687	0.053	0.06	1	ESMs	Scissor_pos_VS_Scissor_neg
KWMTBOMO16039	0.953211035257851	2.47101043699341	0.055	0.06	1	ESMs	Scissor_pos_VS_Scissor_neg
KWMTBOMO05256	0.369844860324783	2.46625395949638	0.07	0.04	1	ESMs	Scissor_pos_VS_Scissor_neg
KWMTBOMO01991	0.345131420001794	2.46584078883109	0.216	0.2	1	ESMs	Scissor_pos_VS_Scissor_neg
KWMTBOMO14991	0.239432115357127	2.46557305117636	0.107	0.06	1	ESMs	Scissor_pos_VS_Scissor_neg
KWMTBOMO07488	0.481493891914636	2.46470838364619	0.062	0.04	1	ESMs	Scissor_pos_VS_Scissor_neg
KWMTBOMO15479	0.614335390879364	2.46447313751905	0.094	0.08	1	ESMs	Scissor_pos_VS_Scissor_neg
KWMTBOMO15074	2.54538340853072e-05	2.46288140426832	0.396	0.1	0.429660719359985	ESMs	Scissor_pos_VS_Scissor_neg
KWMTBOMO14220	0.000881259884114988	2.46255904485887	0.387	0.2	1	ESMs	Scissor_pos_VS_Scissor_neg
KWMTBOMO02549	0.223271527680344	2.45846475624945	0.029	0	1	ESMs	Scissor_pos_VS_Scissor_neg
KWMTBOMO03904	0.0107600587957584	2.45660460254426	0.349	0.24	1	ESMs	Scissor_pos_VS_Scissor_neg
KWMTBOMO16602	0.206973582798877	2.45626750846436	0.031	0	1	ESMs	Scissor_pos_VS_Scissor_neg
KWMTBOMO16705	0.491517298731028	2.45357798623201	0.038	0.02	1	ESMs	Scissor_pos_VS_Scissor_neg
KWMTBOMO10046	0.270943749642976	2.45345951673591	0.024	0	1	ESMs	Scissor_pos_VS_Scissor_neg
KWMTBOMO03105	0.184979967564075	2.45251622794186	0.034	0	1	ESMs	Scissor_pos_VS_Scissor_neg
KWMTBOMO16268	0.214946913377228	2.45223659322139	0.03	0	1	ESMs	Scissor_pos_VS_Scissor_neg
KWMTBOMO12109	0.199332718115395	2.45193977446328	0.032	0	1	ESMs	Scissor_pos_VS_Scissor_neg
KWMTBOMO04580	0.722456821024093	2.45017072934454	0.028	0.02	1	ESMs	Scissor_pos_VS_Scissor_neg
KWMTBOMO04881	0.223230896975765	2.44733791248539	0.186	0.14	1	ESMs	Scissor_pos_VS_Scissor_neg
KWMTBOMO06433	0.5095673394245	2.4441939899958	0.037	0.02	1	ESMs	Scissor_pos_VS_Scissor_neg
KWMTBOMO09508	0.199332718115395	2.43756664013368	0.032	0	1	ESMs	Scissor_pos_VS_Scissor_neg
KWMTBOMO15427	0.712749611076732	2.43626823607367	0.05	0.04	1	ESMs	Scissor_pos_VS_Scissor_neg
KWMTBOMO06143	0.281500855436725	2.43279117420432	0.054	0.02	1	ESMs	Scissor_pos_VS_Scissor_neg
KWMTBOMO07513	0.199332718115395	2.43225977563902	0.032	0	1	ESMs	Scissor_pos_VS_Scissor_neg
KWMTBOMO07796	0.586525581632466	2.43020245978313	0.076	0.06	1	ESMs	Scissor_pos_VS_Scissor_neg
KWMTBOMO07409	0.250565907555311	2.42836368742254	0.026	0	1	ESMs	Scissor_pos_VS_Scissor_neg
KWMTBOMO11516	0.426281794931567	2.42785839693221	0.127	0.1	1	ESMs	Scissor_pos_VS_Scissor_neg
KWMTBOMO12396	0.670090325131936	2.42667129878657	0.052	0.04	1	ESMs	Scissor_pos_VS_Scissor_neg
KWMTBOMO00643	0.5095673394245	2.42581608153921	0.037	0.02	1	ESMs	Scissor_pos_VS_Scissor_neg
KWMTBOMO09476	0.214946897673642	2.42544896699537	0.03	0	1	ESMs	Scissor_pos_VS_Scissor_neg
KWMTBOMO01564	0.952216703950803	2.42520981748172	0.055	0.06	1	ESMs	Scissor_pos_VS_Scissor_neg
KWMTBOMO16476	0.962264778451192	2.42507057932591	0.037	0.04	1	ESMs	Scissor_pos_VS_Scissor_neg
KWMTBOMO01227	0.384556173824278	2.42430663899187	0.131	0.1	1	ESMs	Scissor_pos_VS_Scissor_neg
KWMTBOMO02403	0.281874370217714	2.42396757087904	0.023	0	1	ESMs	Scissor_pos_VS_Scissor_neg
KWMTBOMO12401	0.00328847708188811	2.42291521306123	0.396	0.26	1	ESMs	Scissor_pos_VS_Scissor_neg
KWMTBOMO10592	0.801975645828393	2.41905607515837	0.065	0.06	1	ESMs	Scissor_pos_VS_Scissor_neg
KWMTBOMO04095	0.962264778451192	2.41717736109651	0.037	0.04	1	ESMs	Scissor_pos_VS_Scissor_neg
KWMTBOMO04134	0.231967808144956	2.41641039996873	0.028	0	1	ESMs	Scissor_pos_VS_Scissor_neg
KWMTBOMO14682	0.363515039394166	2.41570101508298	0.046	0.02	1	ESMs	Scissor_pos_VS_Scissor_neg
KWMTBOMO05282	0.835384035390916	2.41560276944665	0.099	0.12	1	ESMs	Scissor_pos_VS_Scissor_neg
KWMTBOMO12023	0.206973582798877	2.41416053247876	0.031	0	1	ESMs	Scissor_pos_VS_Scissor_neg
KWMTBOMO05742	0.602611208780337	2.41409415099823	0.075	0.06	1	ESMs	Scissor_pos_VS_Scissor_neg
KWMTBOMO06910	0.638374235226864	2.41340626211223	0.128	0.12	1	ESMs	Scissor_pos_VS_Scissor_neg
KWMTBOMO14799	0.637159239852062	2.41224686101526	0.128	0.12	1	ESMs	Scissor_pos_VS_Scissor_neg
KWMTBOMO14003	0.241057894251567	2.41203708663484	0.027	0	1	ESMs	Scissor_pos_VS_Scissor_neg
KWMTBOMO08675	0.95011045225474	2.41187470784967	0.076	0.08	1	ESMs	Scissor_pos_VS_Scissor_neg
KWMTBOMO05947	0.192006900604445	2.40957115080242	0.033	0	1	ESMs	Scissor_pos_VS_Scissor_neg
KWMTBOMO08538	0.670849927323951	2.40866197063053	0.091	0.08	1	ESMs	Scissor_pos_VS_Scissor_neg
KWMTBOMO13994	0.647820219419933	2.40784769870863	0.053	0.04	1	ESMs	Scissor_pos_VS_Scissor_neg
KWMTBOMO10540	0.848526314073333	2.40778856588449	0.13	0.16	1	ESMs	Scissor_pos_VS_Scissor_neg
KWMTBOMO07649	0.933479556954412	2.40647244854417	0.077	0.08	1	ESMs	Scissor_pos_VS_Scissor_neg
KWMTBOMO06058	0.83721158583822	2.40596270387053	0.067	0.08	1	ESMs	Scissor_pos_VS_Scissor_neg
KWMTBOMO06624	0.454854098243536	2.40466076286945	0.04	0.02	1	ESMs	Scissor_pos_VS_Scissor_neg
KWMTBOMO00704	0.450561627724738	2.39994317376682	0.064	0.04	1	ESMs	Scissor_pos_VS_Scissor_neg
KWMTBOMO10012	0.260518216438139	2.39740152322686	0.025	0	1	ESMs	Scissor_pos_VS_Scissor_neg
KWMTBOMO07948	0.546849248534828	2.39482228140722	0.135	0.12	1	ESMs	Scissor_pos_VS_Scissor_neg
KWMTBOMO02206	0.665129406843666	2.39252380428723	0.072	0.06	1	ESMs	Scissor_pos_VS_Scissor_neg
KWMTBOMO09512	0.571571716518416	2.38652278447843	0.034	0.02	1	ESMs	Scissor_pos_VS_Scissor_neg
KWMTBOMO06622	0.862662471514474	2.38119307080673	0.081	0.08	1	ESMs	Scissor_pos_VS_Scissor_neg
KWMTBOMO05859	0.831866209301188	2.38109334232929	0.178	0.2	1	ESMs	Scissor_pos_VS_Scissor_neg
KWMTBOMO08618	0.84352970337457	2.38091008898471	0.084	0.1	1	ESMs	Scissor_pos_VS_Scissor_neg
KWMTBOMO10960	0.250565907555311	2.38084250790175	0.026	0	1	ESMs	Scissor_pos_VS_Scissor_neg
KWMTBOMO00550	0.503035706465931	2.3792619998471	0.061	0.04	1	ESMs	Scissor_pos_VS_Scissor_neg
KWMTBOMO10214	0.688837681563424	2.37911926642494	0.125	0.12	1	ESMs	Scissor_pos_VS_Scissor_neg
KWMTBOMO05593	0.292239817289003	2.37813018898101	0.222	0.2	1	ESMs	Scissor_pos_VS_Scissor_neg
KWMTBOMO06589	0.993954474837735	2.37791700620265	0.074	0.08	1	ESMs	Scissor_pos_VS_Scissor_neg
KWMTBOMO00181	0.698530006381662	2.37599370946477	0.045	0.06	1	ESMs	Scissor_pos_VS_Scissor_neg
KWMTBOMO14886	0.663989221354489	2.37390886969737	0.11	0.1	1	ESMs	Scissor_pos_VS_Scissor_neg
KWMTBOMO00353	0.315509112194049	2.37364177856959	0.051	0.02	1	ESMs	Scissor_pos_VS_Scissor_neg
KWMTBOMO07281	0.231967808144956	2.37330660739252	0.028	0	1	ESMs	Scissor_pos_VS_Scissor_neg
KWMTBOMO07168	0.809915561181699	2.37315865899215	0.045	0.04	1	ESMs	Scissor_pos_VS_Scissor_neg
KWMTBOMO00476	0.962264778451192	2.37294453819551	0.037	0.04	1	ESMs	Scissor_pos_VS_Scissor_neg
KWMTBOMO15779	0.5095673394245	2.37276903381567	0.037	0.02	1	ESMs	Scissor_pos_VS_Scissor_neg
KWMTBOMO01677	0.722456821024093	2.37138730197157	0.028	0.02	1	ESMs	Scissor_pos_VS_Scissor_neg
KWMTBOMO02761	0.698530006381662	2.37132404656059	0.045	0.06	1	ESMs	Scissor_pos_VS_Scissor_neg
KWMTBOMO04013	0.001718470294673	2.37117088214301	0.273	0.08	1	ESMs	Scissor_pos_VS_Scissor_neg
KWMTBOMO10376	0.0108125040276215	2.36860932807842	0.28	0.14	1	ESMs	Scissor_pos_VS_Scissor_neg
KWMTBOMO07192	0.260410788485284	2.36649241529299	0.181	0.14	1	ESMs	Scissor_pos_VS_Scissor_neg
KWMTBOMO14110	0.231967808144956	2.36600077659751	0.028	0	1	ESMs	Scissor_pos_VS_Scissor_neg
KWMTBOMO09414	0.360355836100777	2.36279942768678	0.017	0	1	ESMs	Scissor_pos_VS_Scissor_neg
KWMTBOMO06406	0.736011651864333	2.36212217054822	0.049	0.04	1	ESMs	Scissor_pos_VS_Scissor_neg
KWMTBOMO01910	0.88579587767503	2.36176699769824	0.145	0.16	1	ESMs	Scissor_pos_VS_Scissor_neg
KWMTBOMO14159	0.839530473786098	2.36124636887413	0.084	0.1	1	ESMs	Scissor_pos_VS_Scissor_neg
KWMTBOMO14899	0.318760622676469	2.3607054937899	0.19	0.16	1	ESMs	Scissor_pos_VS_Scissor_neg
KWMTBOMO16207	0.241057894251567	2.36014261242818	0.027	0	1	ESMs	Scissor_pos_VS_Scissor_neg
KWMTBOMO11300	0.587299538566605	2.35825243130149	0.096	0.08	1	ESMs	Scissor_pos_VS_Scissor_neg
KWMTBOMO04249	8.26024503896978e-06	2.3568836057632	0.493	0.2	0.13943293625781	ESMs	Scissor_pos_VS_Scissor_neg
KWMTBOMO05832	0.785625343508985	2.3551721919794	0.046	0.04	1	ESMs	Scissor_pos_VS_Scissor_neg
KWMTBOMO02211	0.957758855385709	2.35501805999313	0.121	0.14	1	ESMs	Scissor_pos_VS_Scissor_neg
KWMTBOMO00540	0.264470553942733	2.35467606227601	0.104	0.06	1	ESMs	Scissor_pos_VS_Scissor_neg
KWMTBOMO03246	0.633306632229861	2.35445065314127	0.119	0.16	1	ESMs	Scissor_pos_VS_Scissor_neg
KWMTBOMO13788	0.648741552451481	2.35423539230262	0.053	0.04	1	ESMs	Scissor_pos_VS_Scissor_neg
KWMTBOMO16333	0.241057894251567	2.35169736435763	0.027	0	1	ESMs	Scissor_pos_VS_Scissor_neg
KWMTBOMO16482	0.250565907555311	2.3506817492103	0.026	0	1	ESMs	Scissor_pos_VS_Scissor_neg
KWMTBOMO14442	0.231967808144956	2.34999969140419	0.028	0	1	ESMs	Scissor_pos_VS_Scissor_neg
KWMTBOMO06194	0.151915685833358	2.34707982823967	0.099	0.04	1	ESMs	Scissor_pos_VS_Scissor_neg
KWMTBOMO09147	0.862961145858959	2.34194925250948	0.068	0.08	1	ESMs	Scissor_pos_VS_Scissor_neg
KWMTBOMO10606	0.979503654715624	2.33993740386612	0.125	0.14	1	ESMs	Scissor_pos_VS_Scissor_neg
KWMTBOMO16453	0.472346269735821	2.33955691781208	0.039	0.02	1	ESMs	Scissor_pos_VS_Scissor_neg
KWMTBOMO00537	0.914408659499977	2.33910475383445	0.103	0.12	1	ESMs	Scissor_pos_VS_Scissor_neg
KWMTBOMO08230	0.270943749642976	2.33686519780838	0.024	0	1	ESMs	Scissor_pos_VS_Scissor_neg
KWMTBOMO04146	0.270943749642976	2.33534235645408	0.024	0	1	ESMs	Scissor_pos_VS_Scissor_neg
KWMTBOMO04807	0.406417277092632	2.33503863924757	0.129	0.1	1	ESMs	Scissor_pos_VS_Scissor_neg
KWMTBOMO00465	0.241057894251567	2.33434705941052	0.027	0	1	ESMs	Scissor_pos_VS_Scissor_neg
KWMTBOMO01004	0.264257028259764	2.33401101381081	0.179	0.14	1	ESMs	Scissor_pos_VS_Scissor_neg
KWMTBOMO08379	0.970364338492145	2.33039509398275	0.058	0.06	1	ESMs	Scissor_pos_VS_Scissor_neg
KWMTBOMO14928	0.89023487745741	2.32930603638176	0.042	0.04	1	ESMs	Scissor_pos_VS_Scissor_neg
KWMTBOMO01453	0.32733283317348	2.32831460818191	0.05	0.02	1	ESMs	Scissor_pos_VS_Scissor_neg
KWMTBOMO14293	0.711448332692645	2.32771185663797	0.062	0.08	1	ESMs	Scissor_pos_VS_Scissor_neg
KWMTBOMO14025	0.759951757513116	2.32712771594384	0.048	0.04	1	ESMs	Scissor_pos_VS_Scissor_neg
KWMTBOMO16670	0.304132633082944	2.32559959071653	0.052	0.02	1	ESMs	Scissor_pos_VS_Scissor_neg
KWMTBOMO07741	0.594058636291794	2.32451839159211	0.033	0.02	1	ESMs	Scissor_pos_VS_Scissor_neg
KWMTBOMO10829	0.537462896255201	2.32302331489915	0.118	0.1	1	ESMs	Scissor_pos_VS_Scissor_neg
KWMTBOMO07228	0.438061115738728	2.32154124156966	0.041	0.02	1	ESMs	Scissor_pos_VS_Scissor_neg
KWMTBOMO16169	0.00808174452475439	2.3198940451585	0.211	0.06	1	ESMs	Scissor_pos_VS_Scissor_neg
KWMTBOMO12113	0.518320150514038	2.31826997256748	0.06	0.04	1	ESMs	Scissor_pos_VS_Scissor_neg
KWMTBOMO14875	0.73801757589651	2.31520300887622	0.049	0.04	1	ESMs	Scissor_pos_VS_Scissor_neg
KWMTBOMO03656	0.696225557848894	2.31418985699594	0.07	0.06	1	ESMs	Scissor_pos_VS_Scissor_neg
KWMTBOMO05607	0.250565907555311	2.31374367171961	0.026	0	1	ESMs	Scissor_pos_VS_Scissor_neg
KWMTBOMO08415	0.571571716518416	2.30986000784624	0.034	0.02	1	ESMs	Scissor_pos_VS_Scissor_neg
KWMTBOMO08641	0.000116908011943528	2.3089151753081	0.316	0.06	1	ESMs	Scissor_pos_VS_Scissor_neg
KWMTBOMO12928	0.883213754996223	2.30749796726391	0.069	0.08	1	ESMs	Scissor_pos_VS_Scissor_neg
KWMTBOMO08740	0.593223692342106	2.3058902662389	0.238	0.26	1	ESMs	Scissor_pos_VS_Scissor_neg
KWMTBOMO09507	0.223271527680344	2.30535526877776	0.029	0	1	ESMs	Scissor_pos_VS_Scissor_neg
KWMTBOMO03495	0.844328393262053	2.30502495741436	0.099	0.1	1	ESMs	Scissor_pos_VS_Scissor_neg
KWMTBOMO09661	0.548706347967625	2.30375817592178	0.128	0.18	1	ESMs	Scissor_pos_VS_Scissor_neg
KWMTBOMO04159	0.627115775132616	2.30069374184637	0.054	0.04	1	ESMs	Scissor_pos_VS_Scissor_neg
KWMTBOMO14801	0.804657556863207	2.30066007333104	0.065	0.06	1	ESMs	Scissor_pos_VS_Scissor_neg
KWMTBOMO08580	0.206973582798877	2.30038790789109	0.031	0	1	ESMs	Scissor_pos_VS_Scissor_neg
KWMTBOMO07219	0.260518216438139	2.29998716764721	0.025	0	1	ESMs	Scissor_pos_VS_Scissor_neg
KWMTBOMO06117	0.864135035774653	2.29922639604246	0.034	0.04	1	ESMs	Scissor_pos_VS_Scissor_neg
KWMTBOMO13093	0.617535299732801	2.29710432022444	0.032	0.02	1	ESMs	Scissor_pos_VS_Scissor_neg
KWMTBOMO06999	0.631942709537551	2.2918938044492	0.161	0.16	1	ESMs	Scissor_pos_VS_Scissor_neg
KWMTBOMO14840	0.0419787246068141	2.29152041588519	0.319	0.24	1	ESMs	Scissor_pos_VS_Scissor_neg
KWMTBOMO15157	0.759951757513116	2.28976975746865	0.048	0.04	1	ESMs	Scissor_pos_VS_Scissor_neg
KWMTBOMO11725	0.751754975448034	2.28953954088273	0.027	0.02	1	ESMs	Scissor_pos_VS_Scissor_neg
KWMTBOMO10245	0.689133065843951	2.28789835350061	0.188	0.2	1	ESMs	Scissor_pos_VS_Scissor_neg
KWMTBOMO05740	0.801513252466977	2.2874910653507	0.084	0.08	1	ESMs	Scissor_pos_VS_Scissor_neg
KWMTBOMO06410	0.305395789028594	2.28640300240202	0.021	0	1	ESMs	Scissor_pos_VS_Scissor_neg
KWMTBOMO05450	0.206973582798877	2.28606747868684	0.031	0	1	ESMs	Scissor_pos_VS_Scissor_neg
KWMTBOMO04757	0.89023487745741	2.28584875272355	0.042	0.04	1	ESMs	Scissor_pos_VS_Scissor_neg
KWMTBOMO16246	0.782421485149482	2.28331717627734	0.026	0.02	1	ESMs	Scissor_pos_VS_Scissor_neg
KWMTBOMO12877	0.62260283227966	2.28233368053365	0.094	0.08	1	ESMs	Scissor_pos_VS_Scissor_neg
KWMTBOMO11188	0.376055529009203	2.28016778534566	0.15	0.12	1	ESMs	Scissor_pos_VS_Scissor_neg
KWMTBOMO15932	0.60935704753369	2.27896423407055	0.042	0.06	1	ESMs	Scissor_pos_VS_Scissor_neg
KWMTBOMO07182	8.65510393896396e-05	2.27868686599186	0.458	0.22	1	ESMs	Scissor_pos_VS_Scissor_neg
KWMTBOMO01291	0.853058635076153	2.27706160800455	0.116	0.14	1	ESMs	Scissor_pos_VS_Scissor_neg
KWMTBOMO09049	0.260518216438139	2.27386557570661	0.025	0	1	ESMs	Scissor_pos_VS_Scissor_neg
KWMTBOMO05866	0.250565907555311	2.2720548817926	0.026	0	1	ESMs	Scissor_pos_VS_Scissor_neg
KWMTBOMO01536	0.000150561934398652	2.27155472134372	0.397	0.14	1	ESMs	Scissor_pos_VS_Scissor_neg
KWMTBOMO12645	0.642054783143874	2.27142082283173	0.031	0.02	1	ESMs	Scissor_pos_VS_Scissor_neg
KWMTBOMO07190	0.891353653335258	2.27067825376632	0.042	0.04	1	ESMs	Scissor_pos_VS_Scissor_neg
KWMTBOMO02847	0.392764564161722	2.27062560401869	0.014	0	1	ESMs	Scissor_pos_VS_Scissor_neg
KWMTBOMO07860	0.778255503907718	2.27031978014544	0.195	0.22	1	ESMs	Scissor_pos_VS_Scissor_neg
KWMTBOMO02786	0.281874370217714	2.26556689619061	0.023	0	1	ESMs	Scissor_pos_VS_Scissor_neg
KWMTBOMO14945	0.579475355880232	2.26519456863281	0.041	0.06	1	ESMs	Scissor_pos_VS_Scissor_neg
KWMTBOMO06340	0.911187703166192	2.26460198375189	0.07	0.08	1	ESMs	Scissor_pos_VS_Scissor_neg
KWMTBOMO03713	1.00741040065956e-05	2.26439978188694	0.408	0.08	0.170050875631333	ESMs	Scissor_pos_VS_Scissor_neg
KWMTBOMO01742	0.260518216438139	2.25957153310591	0.025	0	1	ESMs	Scissor_pos_VS_Scissor_neg
KWMTBOMO12776	0.897577451266736	2.25890664756797	0.035	0.04	1	ESMs	Scissor_pos_VS_Scissor_neg
KWMTBOMO16033	0.74217902024424	2.2585631807822	0.138	0.14	1	ESMs	Scissor_pos_VS_Scissor_neg
KWMTBOMO07604	0.00128802388763799	2.25827518633102	0.433	0.3	1	ESMs	Scissor_pos_VS_Scissor_neg
KWMTBOMO03519	0.960232757412552	2.25604174508692	0.072	0.08	1	ESMs	Scissor_pos_VS_Scissor_neg
KWMTBOMO09677	0.656371398734056	2.25513966332004	0.075	0.1	1	ESMs	Scissor_pos_VS_Scissor_neg
KWMTBOMO16032	0.00834149402149939	2.25239620123585	0.331	0.2	1	ESMs	Scissor_pos_VS_Scissor_neg
KWMTBOMO05896	0.827235597505305	2.25230148909792	0.064	0.06	1	ESMs	Scissor_pos_VS_Scissor_neg
KWMTBOMO01346	0.743123708674896	2.25086841431933	0.068	0.06	1	ESMs	Scissor_pos_VS_Scissor_neg
KWMTBOMO09828	0.703827782507815	2.2482196819585	0.089	0.08	1	ESMs	Scissor_pos_VS_Scissor_neg
KWMTBOMO05792	0.571571716518416	2.24797402093471	0.034	0.02	1	ESMs	Scissor_pos_VS_Scissor_neg
KWMTBOMO16097	0.64689942548652	2.24707745375469	0.053	0.04	1	ESMs	Scissor_pos_VS_Scissor_neg
KWMTBOMO16178	0.981977292196578	2.24604156151208	0.092	0.1	1	ESMs	Scissor_pos_VS_Scissor_neg
KWMTBOMO08904	0.133539375988482	2.24560670298993	0.294	0.26	1	ESMs	Scissor_pos_VS_Scissor_neg
KWMTBOMO14574	0.260518216438139	2.2440047688057	0.025	0	1	ESMs	Scissor_pos_VS_Scissor_neg
KWMTBOMO14998	0.318069532256248	2.24356614290995	0.02	0	1	ESMs	Scissor_pos_VS_Scissor_neg
KWMTBOMO04129	0.699151558591348	2.24342020581841	0.107	0.1	1	ESMs	Scissor_pos_VS_Scissor_neg
KWMTBOMO12908	0.250565907555311	2.24054323292666	0.026	0	1	ESMs	Scissor_pos_VS_Scissor_neg
KWMTBOMO04516	0.651610449265986	2.23987950325465	0.092	0.08	1	ESMs	Scissor_pos_VS_Scissor_neg
KWMTBOMO03453	0.182511258912066	2.23756667122587	0.158	0.1	1	ESMs	Scissor_pos_VS_Scissor_neg
KWMTBOMO12239	0.918477366625392	2.23753895469894	0.041	0.04	1	ESMs	Scissor_pos_VS_Scissor_neg
KWMTBOMO06075	0.0366737604919975	2.23657180273029	0.189	0.08	1	ESMs	Scissor_pos_VS_Scissor_neg
KWMTBOMO01428	0.736135378868241	2.23524603532391	0.063	0.08	1	ESMs	Scissor_pos_VS_Scissor_neg
KWMTBOMO00153	0.993490738647197	2.23499835618572	0.038	0.04	1	ESMs	Scissor_pos_VS_Scissor_neg
KWMTBOMO14033	0.495667079630415	2.23369400119691	0.173	0.16	1	ESMs	Scissor_pos_VS_Scissor_neg
KWMTBOMO07063	0.667673773952595	2.23223997359374	0.03	0.02	1	ESMs	Scissor_pos_VS_Scissor_neg
KWMTBOMO11695	0.737014389915781	2.23195175209487	0.049	0.04	1	ESMs	Scissor_pos_VS_Scissor_neg
KWMTBOMO02538	1.14644926685237e-06	2.23084682745433	0.514	0.16	0.0193520636244681	ESMs	Scissor_pos_VS_Scissor_neg
KWMTBOMO10159	0.95889519352327	2.23078976039502	0.142	0.16	1	ESMs	Scissor_pos_VS_Scissor_neg
KWMTBOMO12264	0.694452857352678	2.22980977704564	0.029	0.02	1	ESMs	Scissor_pos_VS_Scissor_neg
KWMTBOMO07116	0.947006142978898	2.22854603344098	0.059	0.06	1	ESMs	Scissor_pos_VS_Scissor_neg
KWMTBOMO15619	0.694452857352678	2.22822839481158	0.029	0.02	1	ESMs	Scissor_pos_VS_Scissor_neg
KWMTBOMO13606	9.85462844369276e-05	2.22333271705822	0.447	0.2	1	ESMs	Scissor_pos_VS_Scissor_neg
KWMTBOMO01183	0.786953543879895	2.22268516119953	0.065	0.08	1	ESMs	Scissor_pos_VS_Scissor_neg
KWMTBOMO07072	0.926337908756372	2.22023037358199	0.171	0.2	1	ESMs	Scissor_pos_VS_Scissor_neg
KWMTBOMO06860	0.782421485149482	2.22004651850905	0.026	0.02	1	ESMs	Scissor_pos_VS_Scissor_neg
KWMTBOMO07655	0.00316601354218909	2.21901312576446	0.294	0.12	1	ESMs	Scissor_pos_VS_Scissor_neg
KWMTBOMO12290	0.995249927188509	2.21860128090841	0.074	0.08	1	ESMs	Scissor_pos_VS_Scissor_neg
KWMTBOMO10318	0.223271527680344	2.21800489710829	0.029	0	1	ESMs	Scissor_pos_VS_Scissor_neg
KWMTBOMO07652	0.88855774075885	2.21637682876274	0.204	0.24	1	ESMs	Scissor_pos_VS_Scissor_neg
KWMTBOMO04148	0.318069532256248	2.21436503397971	0.02	0	1	ESMs	Scissor_pos_VS_Scissor_neg
KWMTBOMO13217	0.722456821024093	2.21368577844824	0.028	0.02	1	ESMs	Scissor_pos_VS_Scissor_neg
KWMTBOMO10575	0.281874370217714	2.2115783117051	0.023	0	1	ESMs	Scissor_pos_VS_Scissor_neg
KWMTBOMO05724	0.903336175047704	2.21041472612108	0.096	0.1	1	ESMs	Scissor_pos_VS_Scissor_neg
KWMTBOMO09716	0.760722606565191	2.20721262915198	0.064	0.08	1	ESMs	Scissor_pos_VS_Scissor_neg
KWMTBOMO11450	0.594058636291794	2.2069464933299	0.033	0.02	1	ESMs	Scissor_pos_VS_Scissor_neg
KWMTBOMO05592	0.881762328925788	2.20674	0.08	0.08	1	ESMs	Scissor_pos_VS_Scissor_neg
KWMTBOMO08559	0.270943749642976	2.20407309920722	0.024	0	1	ESMs	Scissor_pos_VS_Scissor_neg
KWMTBOMO08375	0.345490050725336	2.20363573285915	0.018	0	1	ESMs	Scissor_pos_VS_Scissor_neg
KWMTBOMO06144	0.864305945004403	2.20315462839963	0.081	0.08	1	ESMs	Scissor_pos_VS_Scissor_neg
KWMTBOMO12348	0.811279641552106	2.20149277339112	0.066	0.08	1	ESMs	Scissor_pos_VS_Scissor_neg
KWMTBOMO00205	0.534054886044014	2.2006155288857	0.059	0.04	1	ESMs	Scissor_pos_VS_Scissor_neg
KWMTBOMO11435	0.408047590101381	2.19991638645085	0.043	0.02	1	ESMs	Scissor_pos_VS_Scissor_neg
KWMTBOMO12305	0.00846886428043038	2.19633655077765	0.25	0.1	1	ESMs	Scissor_pos_VS_Scissor_neg
KWMTBOMO02330	0.281874370217714	2.19586208227783	0.023	0	1	ESMs	Scissor_pos_VS_Scissor_neg
KWMTBOMO14976	0.206973582798877	2.19531105689065	0.031	0	1	ESMs	Scissor_pos_VS_Scissor_neg
KWMTBOMO10275	0.835962165454042	2.19520020436688	0.044	0.04	1	ESMs	Scissor_pos_VS_Scissor_neg
KWMTBOMO15130	0.618685179450513	2.19487652188463	0.032	0.02	1	ESMs	Scissor_pos_VS_Scissor_neg
KWMTBOMO05812	0.786953543879895	2.19442076018837	0.066	0.06	1	ESMs	Scissor_pos_VS_Scissor_neg
KWMTBOMO05779	0.305395789028594	2.1913710776507	0.021	0	1	ESMs	Scissor_pos_VS_Scissor_neg
KWMTBOMO06559	0.655598639172526	2.19038154750659	0.075	0.1	1	ESMs	Scissor_pos_VS_Scissor_neg
KWMTBOMO15728	0.751754975448034	2.18775818389817	0.027	0.02	1	ESMs	Scissor_pos_VS_Scissor_neg
KWMTBOMO05049	0.885859617209675	2.18683065150623	0.069	0.08	1	ESMs	Scissor_pos_VS_Scissor_neg
KWMTBOMO10477	0.783713266519172	2.1867695610013	0.113	0.14	1	ESMs	Scissor_pos_VS_Scissor_neg
KWMTBOMO04131	0.835962165454042	2.18282685603166	0.044	0.04	1	ESMs	Scissor_pos_VS_Scissor_neg
KWMTBOMO09951	0.263812509427135	2.18169921585099	0.056	0.02	1	ESMs	Scissor_pos_VS_Scissor_neg
KWMTBOMO15916	0.917839250120169	2.17906680589091	0.178	0.22	1	ESMs	Scissor_pos_VS_Scissor_neg
KWMTBOMO12879	0.909607041751071	2.1736305292989	0.113	0.12	1	ESMs	Scissor_pos_VS_Scissor_neg
KWMTBOMO10327	0.918477366625392	2.17248448484169	0.041	0.04	1	ESMs	Scissor_pos_VS_Scissor_neg
KWMTBOMO14907	0.946995706136682	2.17096707122121	0.111	0.12	1	ESMs	Scissor_pos_VS_Scissor_neg
KWMTBOMO09492	0.512997062110572	2.1706371506366	0.155	0.14	1	ESMs	Scissor_pos_VS_Scissor_neg
KWMTBOMO09126	0.751754975448034	2.16875493928806	0.027	0.02	1	ESMs	Scissor_pos_VS_Scissor_neg
KWMTBOMO03071	0.000368019416711747	2.16708859444336	0.424	0.2	1	ESMs	Scissor_pos_VS_Scissor_neg
KWMTBOMO07716	0.838126085863961	2.16676466361687	0.044	0.04	1	ESMs	Scissor_pos_VS_Scissor_neg
KWMTBOMO08945	0.649663423383264	2.16351081550984	0.053	0.04	1	ESMs	Scissor_pos_VS_Scissor_neg
KWMTBOMO10276	0.379511001651938	2.16224928906476	0.045	0.02	1	ESMs	Scissor_pos_VS_Scissor_neg
KWMTBOMO03750	0.848182494138318	2.15903395066834	0.024	0.02	1	ESMs	Scissor_pos_VS_Scissor_neg
KWMTBOMO12472	0.529508594928412	2.15757764167007	0.186	0.18	1	ESMs	Scissor_pos_VS_Scissor_neg
KWMTBOMO01998	0.293345324945583	2.15694784707659	0.022	0	1	ESMs	Scissor_pos_VS_Scissor_neg
KWMTBOMO07251	0.0683818243528965	2.15597689536806	0.149	0.06	1	ESMs	Scissor_pos_VS_Scissor_neg
KWMTBOMO02688	0.894910602658559	2.15478646853584	0.061	0.06	1	ESMs	Scissor_pos_VS_Scissor_neg
KWMTBOMO09284	0.0132650110698893	2.15072853314473	0.274	0.14	1	ESMs	Scissor_pos_VS_Scissor_neg
KWMTBOMO05525	0.962264778451192	2.15032581456073	0.037	0.04	1	ESMs	Scissor_pos_VS_Scissor_neg
KWMTBOMO08688	0.41049068126903	2.14612295523479	0.013	0	1	ESMs	Scissor_pos_VS_Scissor_neg
KWMTBOMO04905	0.281874370217714	2.14258748321622	0.023	0	1	ESMs	Scissor_pos_VS_Scissor_neg
KWMTBOMO03319	0.579475355880232	2.14244174652169	0.041	0.06	1	ESMs	Scissor_pos_VS_Scissor_neg
KWMTBOMO15566	0.331415741936528	2.14180553585529	0.019	0	1	ESMs	Scissor_pos_VS_Scissor_neg
KWMTBOMO08908	0.293345324945583	2.14096346027118	0.022	0	1	ESMs	Scissor_pos_VS_Scissor_neg
KWMTBOMO00556	0.506098873028325	2.1408538905434	0.061	0.04	1	ESMs	Scissor_pos_VS_Scissor_neg
KWMTBOMO05195	0.996977215767751	2.14062413484772	0.074	0.08	1	ESMs	Scissor_pos_VS_Scissor_neg
KWMTBOMO02774	0.0841107994748607	2.13747900481072	0.239	0.16	1	ESMs	Scissor_pos_VS_Scissor_neg
KWMTBOMO12918	0.72795264835381	2.1351475057901	0.046	0.06	1	ESMs	Scissor_pos_VS_Scissor_neg
KWMTBOMO09051	0.079639391419438	2.1340849572576	0.187	0.1	1	ESMs	Scissor_pos_VS_Scissor_neg
KWMTBOMO02926	0.259878610972445	2.13368450052296	0.083	0.14	1	ESMs	Scissor_pos_VS_Scissor_neg
KWMTBOMO04778	0.628269341173963	2.13293022169282	0.074	0.1	1	ESMs	Scissor_pos_VS_Scissor_neg
KWMTBOMO03325	0.662727498118847	2.13257717445168	0.072	0.06	1	ESMs	Scissor_pos_VS_Scissor_neg
KWMTBOMO10782	0.947968287107636	2.13095498316187	0.059	0.06	1	ESMs	Scissor_pos_VS_Scissor_neg
KWMTBOMO16375	0.604165104261468	2.1298283753009	0.131	0.12	1	ESMs	Scissor_pos_VS_Scissor_neg
KWMTBOMO01827	0.536206748665148	2.12881912824608	0.127	0.18	1	ESMs	Scissor_pos_VS_Scissor_neg
KWMTBOMO11194	0.758082966314143	2.12442234654402	0.064	0.08	1	ESMs	Scissor_pos_VS_Scissor_neg
KWMTBOMO01721	0.550024807719714	2.12439288437469	0.035	0.02	1	ESMs	Scissor_pos_VS_Scissor_neg
KWMTBOMO05746	0.872846268704499	2.12308370745188	0.062	0.06	1	ESMs	Scissor_pos_VS_Scissor_neg
KWMTBOMO03831	0.758962535987351	2.12024669091529	0.064	0.08	1	ESMs	Scissor_pos_VS_Scissor_neg
KWMTBOMO01938	0.454854098243536	2.11881185608068	0.04	0.02	1	ESMs	Scissor_pos_VS_Scissor_neg
KWMTBOMO14982	0.250565907555311	2.11867073202996	0.026	0	1	ESMs	Scissor_pos_VS_Scissor_neg
KWMTBOMO08192	0.693515701644089	2.11785531220451	0.045	0.06	1	ESMs	Scissor_pos_VS_Scissor_neg
KWMTBOMO08246	0.785615860188139	2.11740712778448	0.049	0.06	1	ESMs	Scissor_pos_VS_Scissor_neg
KWMTBOMO14467	0.382853656721626	2.11646110554405	0.104	0.16	1	ESMs	Scissor_pos_VS_Scissor_neg
KWMTBOMO04589	0.239698434547206	2.11512008972749	0.029	0.06	1	ESMs	Scissor_pos_VS_Scissor_neg
KWMTBOMO14626	0.797295667455957	2.11415564383665	0.152	0.16	1	ESMs	Scissor_pos_VS_Scissor_neg
KWMTBOMO02577	0.000131721096882489	2.11313067437938	0.531	0.4	1	ESMs	Scissor_pos_VS_Scissor_neg
KWMTBOMO03982	0.617535299732801	2.11301759397367	0.032	0.02	1	ESMs	Scissor_pos_VS_Scissor_neg
KWMTBOMO02904	0.000143644001172741	2.11196666042077	0.376	0.12	1	ESMs	Scissor_pos_VS_Scissor_neg
KWMTBOMO00004	0.723489217778891	2.11194404699233	0.03	0.04	1	ESMs	Scissor_pos_VS_Scissor_neg
KWMTBOMO07141	0.60935704753369	2.1119277269868	0.042	0.06	1	ESMs	Scissor_pos_VS_Scissor_neg
KWMTBOMO12947	0.895123419685346	2.11088780655439	0.129	0.14	1	ESMs	Scissor_pos_VS_Scissor_neg
KWMTBOMO08789	0.281874370217714	2.10994229677157	0.023	0	1	ESMs	Scissor_pos_VS_Scissor_neg
KWMTBOMO12194	0.795134510299046	2.10790615333339	0.032	0.04	1	ESMs	Scissor_pos_VS_Scissor_neg
KWMTBOMO06404	0.685815869788913	2.10777755662367	0.061	0.08	1	ESMs	Scissor_pos_VS_Scissor_neg
KWMTBOMO06412	0.883452531050369	2.10723783044464	0.023	0.02	1	ESMs	Scissor_pos_VS_Scissor_neg
KWMTBOMO00492	0.993490738647197	2.10688413528284	0.038	0.04	1	ESMs	Scissor_pos_VS_Scissor_neg
KWMTBOMO16471	0.0116364471540831	2.10521428575159	0.178	0.04	1	ESMs	Scissor_pos_VS_Scissor_neg
KWMTBOMO13725	0.864135035774653	2.10462338173234	0.034	0.04	1	ESMs	Scissor_pos_VS_Scissor_neg
KWMTBOMO02004	0.929755319147942	2.09929564749584	0.088	0.1	1	ESMs	Scissor_pos_VS_Scissor_neg
KWMTBOMO05697	0.880953875583896	2.09926849822238	0.19	0.22	1	ESMs	Scissor_pos_VS_Scissor_neg
KWMTBOMO02321	0.331415741936528	2.09912840932586	0.019	0	1	ESMs	Scissor_pos_VS_Scissor_neg
KWMTBOMO06211	0.260518216438139	2.09887252584126	0.025	0	1	ESMs	Scissor_pos_VS_Scissor_neg
KWMTBOMO05948	0.918744740699983	2.09831355904886	0.079	0.08	1	ESMs	Scissor_pos_VS_Scissor_neg
KWMTBOMO08202	0.751754975448034	2.09726664519586	0.027	0.02	1	ESMs	Scissor_pos_VS_Scissor_neg
KWMTBOMO05542	0.39438227126327	2.09707890489573	0.091	0.06	1	ESMs	Scissor_pos_VS_Scissor_neg
KWMTBOMO13568	0.668929473759338	2.09666014399834	0.044	0.06	1	ESMs	Scissor_pos_VS_Scissor_neg
KWMTBOMO04670	0.906624996400308	2.09349465887607	0.087	0.1	1	ESMs	Scissor_pos_VS_Scissor_neg
KWMTBOMO00169	0.431266123580429	2.09293271691634	0.036	0.06	1	ESMs	Scissor_pos_VS_Scissor_neg
KWMTBOMO08533	0.281874370217714	2.09143496053401	0.023	0	1	ESMs	Scissor_pos_VS_Scissor_neg
KWMTBOMO03724	0.270943749642976	2.09067088102968	0.024	0	1	ESMs	Scissor_pos_VS_Scissor_neg
KWMTBOMO01951	0.318069532256248	2.0900220404498	0.02	0	1	ESMs	Scissor_pos_VS_Scissor_neg
KWMTBOMO14259	0.206973582798877	2.09000549387277	0.031	0	1	ESMs	Scissor_pos_VS_Scissor_neg
KWMTBOMO14271	0.814535695713467	2.08866222815172	0.025	0.02	1	ESMs	Scissor_pos_VS_Scissor_neg
KWMTBOMO08704	0.241416589686628	2.08846950320943	0.068	0.12	1	ESMs	Scissor_pos_VS_Scissor_neg
KWMTBOMO08281	0.913019710794555	2.08806451947083	0.164	0.2	1	ESMs	Scissor_pos_VS_Scissor_neg
KWMTBOMO09493	0.253476107513272	2.08721036037295	0.056	0.1	1	ESMs	Scissor_pos_VS_Scissor_neg
KWMTBOMO10383	0.128387872290831	2.08683961878319	0.129	0.06	1	ESMs	Scissor_pos_VS_Scissor_neg
KWMTBOMO06711	0.970364338492145	2.0839342208418	0.058	0.06	1	ESMs	Scissor_pos_VS_Scissor_neg
KWMTBOMO10138	0.60935704753369	2.08189722667588	0.042	0.06	1	ESMs	Scissor_pos_VS_Scissor_neg
KWMTBOMO00993	0.305395789028594	2.07840074078408	0.021	0	1	ESMs	Scissor_pos_VS_Scissor_neg
KWMTBOMO08893	0.188053747150404	2.0780387026692	0.052	0.1	1	ESMs	Scissor_pos_VS_Scissor_neg
KWMTBOMO10044	0.511522530148755	2.07744860633342	0.037	0.02	1	ESMs	Scissor_pos_VS_Scissor_neg
KWMTBOMO05731	0.968354957871478	2.0772359149641	0.09	0.1	1	ESMs	Scissor_pos_VS_Scissor_neg
KWMTBOMO10113	0.223279509595708	2.07562578314532	0.093	0.16	1	ESMs	Scissor_pos_VS_Scissor_neg
KWMTBOMO03284	0.406087312651665	2.07498433555423	0.183	0.16	1	ESMs	Scissor_pos_VS_Scissor_neg
KWMTBOMO04452	0.883452531050369	2.07394238050537	0.023	0.02	1	ESMs	Scissor_pos_VS_Scissor_neg
KWMTBOMO16259	0.607103931417678	2.07094380314674	0.058	0.08	1	ESMs	Scissor_pos_VS_Scissor_neg
KWMTBOMO04187	0.959255354342963	2.06942926483344	0.021	0.02	1	ESMs	Scissor_pos_VS_Scissor_neg
KWMTBOMO03501	0.281874370217714	2.06907081523136	0.023	0	1	ESMs	Scissor_pos_VS_Scissor_neg
KWMTBOMO16167	0.723489217778891	2.06725065879729	0.03	0.04	1	ESMs	Scissor_pos_VS_Scissor_neg
KWMTBOMO14409	0.510637242309417	2.06719079074269	0.139	0.2	1	ESMs	Scissor_pos_VS_Scissor_neg
KWMTBOMO03853	0.831026192914259	2.06649913303975	0.067	0.08	1	ESMs	Scissor_pos_VS_Scissor_neg
KWMTBOMO14458	0.947465613406461	2.06600581423253	0.04	0.04	1	ESMs	Scissor_pos_VS_Scissor_neg
KWMTBOMO14116	0.920442525746097	2.06494017977924	0.022	0.02	1	ESMs	Scissor_pos_VS_Scissor_neg
KWMTBOMO02417	0.642054783143874	2.06376450667346	0.031	0.02	1	ESMs	Scissor_pos_VS_Scissor_neg
KWMTBOMO00840	0.857634133214263	2.06311365284448	0.063	0.06	1	ESMs	Scissor_pos_VS_Scissor_neg
KWMTBOMO14487	0.50122024080242	2.06277089921038	0.248	0.26	1	ESMs	Scissor_pos_VS_Scissor_neg
KWMTBOMO03184	0.60935704753369	2.06128862922141	0.042	0.06	1	ESMs	Scissor_pos_VS_Scissor_neg
KWMTBOMO13236	0.0448659768423788	2.06096802210124	0.205	0.1	1	ESMs	Scissor_pos_VS_Scissor_neg
KWMTBOMO04936	0.751754975448034	2.05838707515618	0.027	0.02	1	ESMs	Scissor_pos_VS_Scissor_neg
KWMTBOMO05647	0.896927124997761	2.0578924051182	0.053	0.06	1	ESMs	Scissor_pos_VS_Scissor_neg
KWMTBOMO14693	0.920442525746097	2.05715761649171	0.022	0.02	1	ESMs	Scissor_pos_VS_Scissor_neg
KWMTBOMO04156	0.782421485149482	2.05550427794222	0.026	0.02	1	ESMs	Scissor_pos_VS_Scissor_neg
KWMTBOMO11569	0.506194819320763	2.05528211891061	0.054	0.08	1	ESMs	Scissor_pos_VS_Scissor_neg
KWMTBOMO12211	0.751754975448034	2.05318995050381	0.027	0.02	1	ESMs	Scissor_pos_VS_Scissor_neg
KWMTBOMO01383	0.40895988638374	2.05284160450712	0.064	0.1	1	ESMs	Scissor_pos_VS_Scissor_neg
KWMTBOMO08239	0.694452857352678	2.04788593758538	0.029	0.02	1	ESMs	Scissor_pos_VS_Scissor_neg
KWMTBOMO15409	0.883213753305185	2.04701780797257	0.069	0.08	1	ESMs	Scissor_pos_VS_Scissor_neg
KWMTBOMO06187	0.786122323318862	2.04372813531087	0.049	0.06	1	ESMs	Scissor_pos_VS_Scissor_neg
KWMTBOMO10130	0.855884479045701	2.04362009350539	0.146	0.18	1	ESMs	Scissor_pos_VS_Scissor_neg
KWMTBOMO08656	0.571571716518416	2.04172697496353	0.034	0.02	1	ESMs	Scissor_pos_VS_Scissor_neg
KWMTBOMO05658	0.70035953039754	2.04129022379143	0.07	0.06	1	ESMs	Scissor_pos_VS_Scissor_neg
KWMTBOMO00652	0.572649613543508	2.04106158184508	0.034	0.02	1	ESMs	Scissor_pos_VS_Scissor_neg
KWMTBOMO14228	0.73801757589651	2.03499661479259	0.049	0.04	1	ESMs	Scissor_pos_VS_Scissor_neg
KWMTBOMO05919	0.979828332194756	2.03411033742518	0.075	0.08	1	ESMs	Scissor_pos_VS_Scissor_neg
KWMTBOMO01384	0.632353932806614	2.03349146130551	0.113	0.1	1	ESMs	Scissor_pos_VS_Scissor_neg
KWMTBOMO05755	0.304769368391557	2.03341918466684	0.099	0.16	1	ESMs	Scissor_pos_VS_Scissor_neg
KWMTBOMO05980	0.964802169288473	2.03335520927623	0.122	0.14	1	ESMs	Scissor_pos_VS_Scissor_neg
KWMTBOMO01512	0.270943749642976	2.03285604789278	0.024	0	1	ESMs	Scissor_pos_VS_Scissor_neg
KWMTBOMO10191	0.642054783143874	2.03219920383551	0.031	0.02	1	ESMs	Scissor_pos_VS_Scissor_neg
KWMTBOMO01877	0.207162643245419	2.02935599622184	0.269	0.24	1	ESMs	Scissor_pos_VS_Scissor_neg
KWMTBOMO10144	0.755947912046958	2.02883822961197	0.104	0.1	1	ESMs	Scissor_pos_VS_Scissor_neg
KWMTBOMO10612	0.853214770987657	2.02859212030942	0.116	0.12	1	ESMs	Scissor_pos_VS_Scissor_neg
KWMTBOMO12030	0.705342294513432	2.02769744143019	0.062	0.08	1	ESMs	Scissor_pos_VS_Scissor_neg
KWMTBOMO01150	0.907668401964361	2.0268526886235	0.07	0.08	1	ESMs	Scissor_pos_VS_Scissor_neg
KWMTBOMO16252	0.771756393338945	2.02648826566104	0.156	0.2	1	ESMs	Scissor_pos_VS_Scissor_neg
KWMTBOMO08565	0.609959153013448	2.0264085288836	0.103	0.14	1	ESMs	Scissor_pos_VS_Scissor_neg
KWMTBOMO04836	0.0131232490705558	2.02443587886968	0.148	0.02	1	ESMs	Scissor_pos_VS_Scissor_neg
KWMTBOMO12190	0.977203523703286	2.02413242334592	0.039	0.04	1	ESMs	Scissor_pos_VS_Scissor_neg
KWMTBOMO09952	4.51675758546508e-08	2.02372389896956	0.644	0.28	0.000762428680426506	ESMs	Scissor_pos_VS_Scissor_neg
KWMTBOMO10854	0.848182494138318	2.02102567589869	0.024	0.02	1	ESMs	Scissor_pos_VS_Scissor_neg
KWMTBOMO03849	0.639190738867045	2.02070187973291	0.043	0.06	1	ESMs	Scissor_pos_VS_Scissor_neg
KWMTBOMO10991	0.736135378868241	2.02052017195365	0.063	0.08	1	ESMs	Scissor_pos_VS_Scissor_neg
KWMTBOMO15947	0.653282561600915	2.01938301474266	0.075	0.1	1	ESMs	Scissor_pos_VS_Scissor_neg
KWMTBOMO03017	0.360355836100777	2.01924545190107	0.017	0	1	ESMs	Scissor_pos_VS_Scissor_neg
KWMTBOMO03244	0.0248412669297808	2.01893061141914	0.222	0.1	1	ESMs	Scissor_pos_VS_Scissor_neg
KWMTBOMO08825	0.993490738647197	2.01891690442443	0.038	0.04	1	ESMs	Scissor_pos_VS_Scissor_neg
KWMTBOMO00905	0.511522530148755	2.01865233146794	0.037	0.02	1	ESMs	Scissor_pos_VS_Scissor_neg
KWMTBOMO14219	0.550024807719714	2.01839094498272	0.035	0.02	1	ESMs	Scissor_pos_VS_Scissor_neg
KWMTBOMO13645	0.728347989056477	2.0180742560798	0.11	0.14	1	ESMs	Scissor_pos_VS_Scissor_neg
KWMTBOMO15363	0.979828332194756	2.01339893989646	0.075	0.08	1	ESMs	Scissor_pos_VS_Scissor_neg
KWMTBOMO14925	0.759625871858421	2.01287208881331	0.031	0.04	1	ESMs	Scissor_pos_VS_Scissor_neg
KWMTBOMO00129	0.570231316749864	2.01155754843336	0.101	0.14	1	ESMs	Scissor_pos_VS_Scissor_neg
KWMTBOMO14606	0.331415741936528	2.01155610957791	0.019	0	1	ESMs	Scissor_pos_VS_Scissor_neg
KWMTBOMO02835	0.133501054104274	2.01103885618224	0.31	0.28	1	ESMs	Scissor_pos_VS_Scissor_neg
KWMTBOMO01142	0.811768728853351	2.00380597847505	0.05	0.06	1	ESMs	Scissor_pos_VS_Scissor_neg
KWMTBOMO00399	0.34280625333511	2.00214856618578	0.02	0.04	1	ESMs	Scissor_pos_VS_Scissor_neg
KWMTBOMO09491	0.694452857352678	2.00206441270754	0.029	0.02	1	ESMs	Scissor_pos_VS_Scissor_neg
KWMTBOMO03083	0.594058636291794	2.0010504359462	0.033	0.02	1	ESMs	Scissor_pos_VS_Scissor_neg
KWMTBOMO11782	0.759625871858421	1.99643762220669	0.031	0.04	1	ESMs	Scissor_pos_VS_Scissor_neg
KWMTBOMO11349	0.271981195427864	1.99602783629635	0.043	0.08	1	ESMs	Scissor_pos_VS_Scissor_neg
KWMTBOMO14617	0.864135035774653	1.99361354489841	0.034	0.04	1	ESMs	Scissor_pos_VS_Scissor_neg
KWMTBOMO04181	0.091620954380939	1.99255323412411	0.282	0.22	1	ESMs	Scissor_pos_VS_Scissor_neg
KWMTBOMO12130	0.883452531050369	1.99207159355498	0.023	0.02	1	ESMs	Scissor_pos_VS_Scissor_neg
KWMTBOMO03852	0.756279275471213	1.99169152426342	0.139	0.14	1	ESMs	Scissor_pos_VS_Scissor_neg
KWMTBOMO00654	0.668929473759338	1.99049512890747	0.044	0.06	1	ESMs	Scissor_pos_VS_Scissor_neg
KWMTBOMO07843	0.783424371853411	1.99046642935656	0.065	0.08	1	ESMs	Scissor_pos_VS_Scissor_neg
KWMTBOMO00407	0.628489569081961	1.99007028272811	0.059	0.08	1	ESMs	Scissor_pos_VS_Scissor_neg
KWMTBOMO07403	0.780050849061366	1.98912998149954	0.049	0.06	1	ESMs	Scissor_pos_VS_Scissor_neg
KWMTBOMO11062	0.360355806672543	1.98840682847727	0.017	0	1	ESMs	Scissor_pos_VS_Scissor_neg
KWMTBOMO01334	0.891904833339835	1.98804885766376	0.053	0.06	1	ESMs	Scissor_pos_VS_Scissor_neg
KWMTBOMO07682	0.544528636862406	1.98761169735885	0.07	0.1	1	ESMs	Scissor_pos_VS_Scissor_neg
KWMTBOMO00952	0.751754975448034	1.98736214689633	0.027	0.02	1	ESMs	Scissor_pos_VS_Scissor_neg
KWMTBOMO09304	0.715425479505935	1.98700353618662	0.094	0.12	1	ESMs	Scissor_pos_VS_Scissor_neg
KWMTBOMO15909	0.611789721898198	1.98688832629127	0.027	0.04	1	ESMs	Scissor_pos_VS_Scissor_neg
KWMTBOMO04673	0.616347224974748	1.98551256619289	0.132	0.18	1	ESMs	Scissor_pos_VS_Scissor_neg
KWMTBOMO06708	0.878542847033018	1.98524446982019	0.086	0.1	1	ESMs	Scissor_pos_VS_Scissor_neg
KWMTBOMO03154	0.817122458862535	1.98449806570108	0.015	0.02	1	ESMs	Scissor_pos_VS_Scissor_neg
KWMTBOMO12474	0.594058636291794	1.98380175724416	0.033	0.02	1	ESMs	Scissor_pos_VS_Scissor_neg
KWMTBOMO01568	0.633700380169118	1.98244928178916	0.094	0.08	1	ESMs	Scissor_pos_VS_Scissor_neg
KWMTBOMO08807	0.376085885697658	1.9812594035473	0.015	0	1	ESMs	Scissor_pos_VS_Scissor_neg
KWMTBOMO02499	0.782421485149482	1.98106732524183	0.026	0.02	1	ESMs	Scissor_pos_VS_Scissor_neg
KWMTBOMO10994	0.876149075606749	1.98061759098572	0.086	0.1	1	ESMs	Scissor_pos_VS_Scissor_neg
KWMTBOMO05691	0.713013317582301	1.97978523530605	0.124	0.16	1	ESMs	Scissor_pos_VS_Scissor_neg
KWMTBOMO07252	0.214573038707061	1.97705498680505	0.166	0.28	1	ESMs	Scissor_pos_VS_Scissor_neg
KWMTBOMO15753	0.893727719907783	1.97700288090516	0.146	0.16	1	ESMs	Scissor_pos_VS_Scissor_neg
KWMTBOMO08129	0.883452531050369	1.97677879509445	0.023	0.02	1	ESMs	Scissor_pos_VS_Scissor_neg
KWMTBOMO07872	0.978970158089523	1.97632646232804	0.075	0.08	1	ESMs	Scissor_pos_VS_Scissor_neg
KWMTBOMO08870	0.392764564161722	1.97608356307764	0.014	0	1	ESMs	Scissor_pos_VS_Scissor_neg
KWMTBOMO11318	0.293345324945583	1.97565822187879	0.022	0	1	ESMs	Scissor_pos_VS_Scissor_neg
KWMTBOMO03847	0.0193089531165452	1.97537942321532	0.163	0.04	1	ESMs	Scissor_pos_VS_Scissor_neg
KWMTBOMO11391	0.476929220094359	1.97502457156369	0.039	0.02	1	ESMs	Scissor_pos_VS_Scissor_neg
KWMTBOMO14872	0.782421485149482	1.97490500527892	0.026	0.02	1	ESMs	Scissor_pos_VS_Scissor_neg
KWMTBOMO04343	0.883452531050369	1.97272541131122	0.023	0.02	1	ESMs	Scissor_pos_VS_Scissor_neg
KWMTBOMO04894	0.0050709718056592	1.97192497912068	0.342	0.18	1	ESMs	Scissor_pos_VS_Scissor_neg
KWMTBOMO02294	0.958630145273551	1.97055948962082	0.076	0.08	1	ESMs	Scissor_pos_VS_Scissor_neg
KWMTBOMO06130	0.52937127253551	1.96873936499855	0.036	0.02	1	ESMs	Scissor_pos_VS_Scissor_neg
KWMTBOMO15882	0.318069532256248	1.96840761830028	0.02	0	1	ESMs	Scissor_pos_VS_Scissor_neg
KWMTBOMO08934	0.698530006381662	1.96824832370451	0.045	0.06	1	ESMs	Scissor_pos_VS_Scissor_neg
KWMTBOMO01655	0.89961871302043	1.96628058428034	0.061	0.06	1	ESMs	Scissor_pos_VS_Scissor_neg
KWMTBOMO12898	0.78243610075948	1.96585798970169	0.103	0.1	1	ESMs	Scissor_pos_VS_Scissor_neg
KWMTBOMO12185	0.496619440438875	1.96522721302197	0.024	0.04	1	ESMs	Scissor_pos_VS_Scissor_neg
KWMTBOMO13840	0.459643996565886	1.96521	0.037	0.06	1	ESMs	Scissor_pos_VS_Scissor_neg
KWMTBOMO10172	0.395772546230864	1.9624015712854	0.119	0.18	1	ESMs	Scissor_pos_VS_Scissor_neg
KWMTBOMO06201	0.504949029604935	1.96070328037571	0.061	0.04	1	ESMs	Scissor_pos_VS_Scissor_neg
KWMTBOMO00158	0.305958904341979	1.96052427623695	0.077	0.04	1	ESMs	Scissor_pos_VS_Scissor_neg
KWMTBOMO01456	0.411569467934617	1.95958866095469	0.064	0.1	1	ESMs	Scissor_pos_VS_Scissor_neg
KWMTBOMO10003	0.739599409574727	1.95855697218024	0.08	0.1	1	ESMs	Scissor_pos_VS_Scissor_neg
KWMTBOMO10487	0.864135035774653	1.9578807557128	0.034	0.04	1	ESMs	Scissor_pos_VS_Scissor_neg
KWMTBOMO04864	0.429381362943892	1.95352969447034	0.012	0	1	ESMs	Scissor_pos_VS_Scissor_neg
KWMTBOMO15197	0.305395789028594	1.95309372755147	0.021	0	1	ESMs	Scissor_pos_VS_Scissor_neg
KWMTBOMO12258	0.42197775611864	1.95261689808635	0.129	0.1	1	ESMs	Scissor_pos_VS_Scissor_neg
KWMTBOMO15012	0.324300195022865	1.95207956328412	0.06	0.1	1	ESMs	Scissor_pos_VS_Scissor_neg
KWMTBOMO10207	0.392764564161722	1.94963335817572	0.014	0	1	ESMs	Scissor_pos_VS_Scissor_neg
KWMTBOMO04879	0.631414122139548	1.94960416842619	0.074	0.06	1	ESMs	Scissor_pos_VS_Scissor_neg
KWMTBOMO14664	0.864135035774653	1.94912989625952	0.034	0.04	1	ESMs	Scissor_pos_VS_Scissor_neg
KWMTBOMO11230	0.293345324945583	1.94873750606479	0.022	0	1	ESMs	Scissor_pos_VS_Scissor_neg
KWMTBOMO05991	0.138376403171784	1.94441111147917	0.308	0.28	1	ESMs	Scissor_pos_VS_Scissor_neg
KWMTBOMO12603	0.227450550911721	1.94393457236732	0.189	0.14	1	ESMs	Scissor_pos_VS_Scissor_neg
KWMTBOMO02071	0.57753963359493	1.9435943881012	0.041	0.06	1	ESMs	Scissor_pos_VS_Scissor_neg
KWMTBOMO04804	0.355257527243258	1.94343240838955	0.251	0.24	1	ESMs	Scissor_pos_VS_Scissor_neg
KWMTBOMO09837	0.795134510299046	1.94322344562265	0.032	0.04	1	ESMs	Scissor_pos_VS_Scissor_neg
KWMTBOMO06516	0.848182494138318	1.94243459149552	0.024	0.02	1	ESMs	Scissor_pos_VS_Scissor_neg
KWMTBOMO11961	0.959255354342963	1.94128925773526	0.021	0.02	1	ESMs	Scissor_pos_VS_Scissor_neg
KWMTBOMO09983	0.515605341689227	1.94074332800613	0.082	0.06	1	ESMs	Scissor_pos_VS_Scissor_neg
KWMTBOMO03082	0.535246548374576	1.93955261028835	0.025	0.04	1	ESMs	Scissor_pos_VS_Scissor_neg
KWMTBOMO15770	0.0051899527702624	1.93914839283157	0.322	0.16	1	ESMs	Scissor_pos_VS_Scissor_neg
KWMTBOMO02690	0.452458264732552	1.93891710429324	0.225	0.22	1	ESMs	Scissor_pos_VS_Scissor_neg
KWMTBOMO16401	0.884095565813961	1.93875140094607	0.069	0.08	1	ESMs	Scissor_pos_VS_Scissor_neg
KWMTBOMO02946	0.783084934896288	1.93673060793297	0.049	0.06	1	ESMs	Scissor_pos_VS_Scissor_neg
KWMTBOMO05665	0.733504518830709	1.93534750610705	0.063	0.08	1	ESMs	Scissor_pos_VS_Scissor_neg
KWMTBOMO06572	0.809915561181699	1.93493686819907	0.045	0.04	1	ESMs	Scissor_pos_VS_Scissor_neg
KWMTBOMO11679	0.947465614692175	1.93251404355635	0.04	0.04	1	ESMs	Scissor_pos_VS_Scissor_neg
KWMTBOMO02922	0.318069532256248	1.93146695664206	0.02	0	1	ESMs	Scissor_pos_VS_Scissor_neg
KWMTBOMO01538	2.61128103929047e-05	1.92996694090322	0.593	0.44	0.440784239432232	ESMs	Scissor_pos_VS_Scissor_neg
KWMTBOMO13748	0.594058636291794	1.92983800567817	0.033	0.02	1	ESMs	Scissor_pos_VS_Scissor_neg
KWMTBOMO04669	0.918477366625392	1.92706666514894	0.041	0.04	1	ESMs	Scissor_pos_VS_Scissor_neg
KWMTBOMO05209	0.129027475534636	1.92640863021033	0.285	0.24	1	ESMs	Scissor_pos_VS_Scissor_neg
KWMTBOMO15306	1.16452020867588e-13	1.9262626981814	0.839	0.52	1.96571011224489e-09	ESMs	Scissor_pos_VS_Scissor_neg
KWMTBOMO09278	0.792082043955416	1.92584149005129	0.082	0.1	1	ESMs	Scissor_pos_VS_Scissor_neg
KWMTBOMO00639	0.795134510299046	1.92547	0.032	0.04	1	ESMs	Scissor_pos_VS_Scissor_neg
KWMTBOMO14029	0.759625871858421	1.92203650137662	0.031	0.04	1	ESMs	Scissor_pos_VS_Scissor_neg
KWMTBOMO01837	0.848182494138318	1.92156683792333	0.024	0.02	1	ESMs	Scissor_pos_VS_Scissor_neg
KWMTBOMO16405	0.402305288683731	1.92001594870213	0.035	0.06	1	ESMs	Scissor_pos_VS_Scissor_neg
KWMTBOMO01199	0.376085885697658	1.91897665068138	0.015	0	1	ESMs	Scissor_pos_VS_Scissor_neg
KWMTBOMO05449	0.884071688227966	1.91798986679062	0.189	0.24	1	ESMs	Scissor_pos_VS_Scissor_neg
KWMTBOMO14295	0.492290701193742	1.91751604594449	0.176	0.16	1	ESMs	Scissor_pos_VS_Scissor_neg
KWMTBOMO10542	0.72040971005517	1.91665209672948	0.079	0.1	1	ESMs	Scissor_pos_VS_Scissor_neg
KWMTBOMO11863	0.920442525746097	1.91618762233681	0.022	0.02	1	ESMs	Scissor_pos_VS_Scissor_neg
KWMTBOMO01579	0.705403822445695	1.91414126419562	0.108	0.1	1	ESMs	Scissor_pos_VS_Scissor_neg
KWMTBOMO08145	0.791843381939687	1.91240882249416	0.144	0.18	1	ESMs	Scissor_pos_VS_Scissor_neg
KWMTBOMO02382	0.376085885697658	1.9123186018671	0.015	0	1	ESMs	Scissor_pos_VS_Scissor_neg
KWMTBOMO12357	0.360355836100777	1.90996851595522	0.017	0	1	ESMs	Scissor_pos_VS_Scissor_neg
KWMTBOMO14316	0.305395789028594	1.90914564081442	0.021	0	1	ESMs	Scissor_pos_VS_Scissor_neg
KWMTBOMO04877	0.237500733946306	1.90885881057572	0.055	0.1	1	ESMs	Scissor_pos_VS_Scissor_neg
KWMTBOMO06932	0.0100352743682625	1.90839789011633	0.308	0.16	1	ESMs	Scissor_pos_VS_Scissor_neg
KWMTBOMO06199	0.00453758248715402	1.90698774501075	0.332	0.18	1	ESMs	Scissor_pos_VS_Scissor_neg
KWMTBOMO06266	0.293345324945583	1.90665312049076	0.022	0	1	ESMs	Scissor_pos_VS_Scissor_neg
KWMTBOMO12664	0.961067771449202	1.90343899879973	0.037	0.04	1	ESMs	Scissor_pos_VS_Scissor_neg
KWMTBOMO12858	0.807746280946294	1.90306259887491	0.066	0.08	1	ESMs	Scissor_pos_VS_Scissor_neg
KWMTBOMO05455	0.639190738867045	1.9028756405131	0.043	0.06	1	ESMs	Scissor_pos_VS_Scissor_neg
KWMTBOMO13147	0.878431903677236	1.90244662011116	0.062	0.06	1	ESMs	Scissor_pos_VS_Scissor_neg
KWMTBOMO02677	0.331415741936528	1.90214382481685	0.019	0	1	ESMs	Scissor_pos_VS_Scissor_neg
KWMTBOMO03832	0.893918980786611	1.89967356205808	0.035	0.04	1	ESMs	Scissor_pos_VS_Scissor_neg
KWMTBOMO07542	0.848182494138318	1.89941314935511	0.024	0.02	1	ESMs	Scissor_pos_VS_Scissor_neg
KWMTBOMO05633	0.686767636015741	1.89934036045732	0.029	0.04	1	ESMs	Scissor_pos_VS_Scissor_neg
KWMTBOMO00893	0.260518216438139	1.89869851060892	0.025	0	1	ESMs	Scissor_pos_VS_Scissor_neg
KWMTBOMO05249	0.250565907555311	1.89863924276576	0.026	0	1	ESMs	Scissor_pos_VS_Scissor_neg
KWMTBOMO13428	0.921886707736452	1.89783568904484	0.041	0.04	1	ESMs	Scissor_pos_VS_Scissor_neg
KWMTBOMO13669	0.753118040691611	1.89666941642776	0.048	0.06	1	ESMs	Scissor_pos_VS_Scissor_neg
KWMTBOMO08292	0.000894430249911589	1.89652103393023	0.257	0.04	1	ESMs	Scissor_pos_VS_Scissor_neg
KWMTBOMO05234	0.751754975448034	1.8956078269125	0.027	0.02	1	ESMs	Scissor_pos_VS_Scissor_neg
KWMTBOMO11377	0.493535808603413	1.89465053417182	0.083	0.12	1	ESMs	Scissor_pos_VS_Scissor_neg
KWMTBOMO10189	0.977203523703286	1.89386434260396	0.039	0.04	1	ESMs	Scissor_pos_VS_Scissor_neg
KWMTBOMO04264	0.529809823231345	1.89362019723348	0.055	0.08	1	ESMs	Scissor_pos_VS_Scissor_neg
KWMTBOMO01084	0.950634202731577	1.89314403069669	0.143	0.16	1	ESMs	Scissor_pos_VS_Scissor_neg
KWMTBOMO07774	0.376085885697658	1.89144721321693	0.015	0	1	ESMs	Scissor_pos_VS_Scissor_neg
KWMTBOMO08787	0.759625871858421	1.89136709112103	0.031	0.04	1	ESMs	Scissor_pos_VS_Scissor_neg
KWMTBOMO13993	0.486101729634133	1.89112012474738	0.105	0.08	1	ESMs	Scissor_pos_VS_Scissor_neg
KWMTBOMO13870	0.270943749642976	1.89047329636113	0.024	0	1	ESMs	Scissor_pos_VS_Scissor_neg
KWMTBOMO07859	0.518836378055454	1.89023312611392	0.039	0.06	1	ESMs	Scissor_pos_VS_Scissor_neg
KWMTBOMO05737	0.331415741936528	1.88928972045889	0.019	0	1	ESMs	Scissor_pos_VS_Scissor_neg
KWMTBOMO06003	0.285178473851306	1.88793013038953	0.085	0.14	1	ESMs	Scissor_pos_VS_Scissor_neg
KWMTBOMO14575	0.902832335069311	1.88751585405269	0.07	0.08	1	ESMs	Scissor_pos_VS_Scissor_neg
KWMTBOMO05425	0.331415741936528	1.88670089462805	0.019	0	1	ESMs	Scissor_pos_VS_Scissor_neg
KWMTBOMO08131	0.883452531050369	1.88379647961053	0.023	0.02	1	ESMs	Scissor_pos_VS_Scissor_neg
KWMTBOMO09790	0.866194445804147	1.88346072703264	0.052	0.06	1	ESMs	Scissor_pos_VS_Scissor_neg
KWMTBOMO07410	0.695717560975625	1.88257900907634	0.029	0.02	1	ESMs	Scissor_pos_VS_Scissor_neg
KWMTBOMO02652	0.654120191463832	1.88257263700073	0.06	0.08	1	ESMs	Scissor_pos_VS_Scissor_neg
KWMTBOMO04197	0.284271856404805	1.8824171693743	0.085	0.14	1	ESMs	Scissor_pos_VS_Scissor_neg
KWMTBOMO05698	0.91145645192593	1.8804939652098	0.103	0.12	1	ESMs	Scissor_pos_VS_Scissor_neg
KWMTBOMO07538	0.0736415452595386	1.87937047313185	0.21	0.12	1	ESMs	Scissor_pos_VS_Scissor_neg
KWMTBOMO16409	0.290466974603165	1.87929270946793	0.098	0.16	1	ESMs	Scissor_pos_VS_Scissor_neg
KWMTBOMO11333	0.345490050725336	1.87928611010629	0.018	0	1	ESMs	Scissor_pos_VS_Scissor_neg
KWMTBOMO06047	0.345490050725336	1.87847273523623	0.018	0	1	ESMs	Scissor_pos_VS_Scissor_neg
KWMTBOMO01537	3.96122817145417e-05	1.87800886123267	0.808	0.74	0.668655315341465	ESMs	Scissor_pos_VS_Scissor_neg
KWMTBOMO07775	0.952078196906942	1.87734373074663	0.04	0.04	1	ESMs	Scissor_pos_VS_Scissor_neg
KWMTBOMO01335	0.492537336859558	1.87614531877087	0.191	0.18	1	ESMs	Scissor_pos_VS_Scissor_neg
KWMTBOMO00444	0.864135035774653	1.87559180578595	0.034	0.04	1	ESMs	Scissor_pos_VS_Scissor_neg
KWMTBOMO07842	0.389681248110335	1.8707194358013	0.285	0.3	1	ESMs	Scissor_pos_VS_Scissor_neg
KWMTBOMO04154	0.723489217778891	1.8706903858179	0.03	0.04	1	ESMs	Scissor_pos_VS_Scissor_neg
KWMTBOMO03559	0.776149854947075	1.87068703906954	0.086	0.08	1	ESMs	Scissor_pos_VS_Scissor_neg
KWMTBOMO03906	0.501415145043498	1.87005645658736	0.054	0.08	1	ESMs	Scissor_pos_VS_Scissor_neg
KWMTBOMO05637	0.360355836100777	1.86719611603427	0.017	0	1	ESMs	Scissor_pos_VS_Scissor_neg
KWMTBOMO00328	0.57753963359493	1.86717883973421	0.041	0.06	1	ESMs	Scissor_pos_VS_Scissor_neg
KWMTBOMO09503	0.580465143025904	1.86624982166735	0.072	0.1	1	ESMs	Scissor_pos_VS_Scissor_neg
KWMTBOMO10794	0.412820916714823	1.86384053248714	0.079	0.12	1	ESMs	Scissor_pos_VS_Scissor_neg
KWMTBOMO13300	0.751754975448034	1.86334632511116	0.027	0.02	1	ESMs	Scissor_pos_VS_Scissor_neg
KWMTBOMO01247	0.305395789028594	1.8611302504808	0.021	0	1	ESMs	Scissor_pos_VS_Scissor_neg
KWMTBOMO00301	0.693515701644089	1.86076116698035	0.045	0.06	1	ESMs	Scissor_pos_VS_Scissor_neg
KWMTBOMO04004	0.25271737594337	1.86060543884013	0.056	0.1	1	ESMs	Scissor_pos_VS_Scissor_neg
KWMTBOMO08098	0.792936318092054	1.85975637296334	0.046	0.04	1	ESMs	Scissor_pos_VS_Scissor_neg
KWMTBOMO15557	0.959255354342963	1.85885449792125	0.021	0.02	1	ESMs	Scissor_pos_VS_Scissor_neg
KWMTBOMO00199	0.686767636015741	1.85860784163472	0.029	0.04	1	ESMs	Scissor_pos_VS_Scissor_neg
KWMTBOMO13623	0.345490050725336	1.85816112661993	0.018	0	1	ESMs	Scissor_pos_VS_Scissor_neg
KWMTBOMO05858	0.759625871858421	1.85747050502066	0.031	0.04	1	ESMs	Scissor_pos_VS_Scissor_neg
KWMTBOMO14168	0.0335303178880012	1.85722022048369	0.25	0.14	1	ESMs	Scissor_pos_VS_Scissor_neg
KWMTBOMO02291	0.782421485149482	1.85671235487762	0.026	0.02	1	ESMs	Scissor_pos_VS_Scissor_neg
KWMTBOMO14136	0.991795424909217	1.85577208885087	0.074	0.08	1	ESMs	Scissor_pos_VS_Scissor_neg
KWMTBOMO05050	0.318069532256248	1.85417555618369	0.02	0	1	ESMs	Scissor_pos_VS_Scissor_neg
KWMTBOMO03127	0.783808125422275	1.85409605012474	0.026	0.02	1	ESMs	Scissor_pos_VS_Scissor_neg
KWMTBOMO04537	0.667673773952595	1.85393905604857	0.03	0.02	1	ESMs	Scissor_pos_VS_Scissor_neg
KWMTBOMO05360	0.726944188409017	1.85316572824243	0.046	0.06	1	ESMs	Scissor_pos_VS_Scissor_neg
KWMTBOMO10833	0.530662334103763	1.85228585798528	0.142	0.2	1	ESMs	Scissor_pos_VS_Scissor_neg
KWMTBOMO14855	0.782421485149482	1.85208288462411	0.026	0.02	1	ESMs	Scissor_pos_VS_Scissor_neg
KWMTBOMO16309	0.507931096213722	1.84724551692541	0.22	0.22	1	ESMs	Scissor_pos_VS_Scissor_neg
KWMTBOMO01876	0.48994529518464	1.84717869887604	0.176	0.16	1	ESMs	Scissor_pos_VS_Scissor_neg
KWMTBOMO01203	0.0191861195243023	1.84705062462372	0.339	0.22	1	ESMs	Scissor_pos_VS_Scissor_neg
KWMTBOMO09153	0.392764564161722	1.84668680736368	0.014	0	1	ESMs	Scissor_pos_VS_Scissor_neg
KWMTBOMO15569	0.196680131857073	1.8459443242124	0.065	0.12	1	ESMs	Scissor_pos_VS_Scissor_neg
KWMTBOMO16484	5.28404346778087e-08	1.84532649457617	0.762	0.5	0.00089194653736141	ESMs	Scissor_pos_VS_Scissor_neg
KWMTBOMO10792	0.60935704753369	1.84429559480213	0.042	0.06	1	ESMs	Scissor_pos_VS_Scissor_neg
KWMTBOMO06005	0.959255354342963	1.8436979245346	0.021	0.02	1	ESMs	Scissor_pos_VS_Scissor_neg
KWMTBOMO05975	0.781661455223519	1.84205140274222	0.065	0.08	1	ESMs	Scissor_pos_VS_Scissor_neg
KWMTBOMO04563	0.00463671533075239	1.84194413699176	0.271	0.1	1	ESMs	Scissor_pos_VS_Scissor_neg
KWMTBOMO02658	0.535443170897425	1.84146987029743	0.156	0.22	1	ESMs	Scissor_pos_VS_Scissor_neg
KWMTBOMO12370	0.941514372540363	1.84114122120558	0.077	0.08	1	ESMs	Scissor_pos_VS_Scissor_neg
KWMTBOMO11332	0.360355836100777	1.83977675396366	0.017	0	1	ESMs	Scissor_pos_VS_Scissor_neg
KWMTBOMO01353	0.832828828538676	1.83945406404121	0.119	0.12	1	ESMs	Scissor_pos_VS_Scissor_neg
KWMTBOMO00687	0.622808808679338	1.8372260852198	0.275	0.32	1	ESMs	Scissor_pos_VS_Scissor_neg
KWMTBOMO10613	0.600707274726346	1.83583117918252	0.118	0.16	1	ESMs	Scissor_pos_VS_Scissor_neg
KWMTBOMO12579	0.562850612222693	1.83505967687751	0.071	0.1	1	ESMs	Scissor_pos_VS_Scissor_neg
KWMTBOMO04155	0.345490050725336	1.8345130001517	0.018	0	1	ESMs	Scissor_pos_VS_Scissor_neg
KWMTBOMO03452	0.131936041002564	1.8343427546864	0.048	0.1	1	ESMs	Scissor_pos_VS_Scissor_neg
KWMTBOMO00186	0.376085854533856	1.83428050131257	0.015	0	1	ESMs	Scissor_pos_VS_Scissor_neg
KWMTBOMO14453	0.429381362943892	1.83370785218371	0.012	0	1	ESMs	Scissor_pos_VS_Scissor_neg
KWMTBOMO09933	0.692527397571691	1.83191834575309	0.108	0.1	1	ESMs	Scissor_pos_VS_Scissor_neg
KWMTBOMO06595	0.359902275444518	1.82882772915614	0.13	0.2	1	ESMs	Scissor_pos_VS_Scissor_neg
KWMTBOMO07777	0.345490050725336	1.82790774203235	0.018	0	1	ESMs	Scissor_pos_VS_Scissor_neg
KWMTBOMO15281	0.66995699331674	1.82724566940042	0.11	0.1	1	ESMs	Scissor_pos_VS_Scissor_neg
KWMTBOMO12135	0.145076508633665	1.82601253642444	0.049	0.1	1	ESMs	Scissor_pos_VS_Scissor_neg
KWMTBOMO04812	0.913965145967201	1.82598022825532	0.018	0.02	1	ESMs	Scissor_pos_VS_Scissor_neg
KWMTBOMO08233	0.764953097168224	1.8248637962386	0.014	0.02	1	ESMs	Scissor_pos_VS_Scissor_neg
KWMTBOMO02402	0.41049068126903	1.82252193179787	0.013	0	1	ESMs	Scissor_pos_VS_Scissor_neg
KWMTBOMO13749	0.721331912719566	1.82212474571249	0.124	0.16	1	ESMs	Scissor_pos_VS_Scissor_neg
KWMTBOMO08009	0.0566503821942919	1.82059418578747	0.274	0.18	1	ESMs	Scissor_pos_VS_Scissor_neg
KWMTBOMO08303	0.268223947975323	1.82020716910894	0.084	0.14	1	ESMs	Scissor_pos_VS_Scissor_neg
KWMTBOMO07748	0.828378491176073	1.82002225245288	0.067	0.08	1	ESMs	Scissor_pos_VS_Scissor_neg
KWMTBOMO04112	0.896950733559976	1.81992790359743	0.042	0.04	1	ESMs	Scissor_pos_VS_Scissor_neg
KWMTBOMO15616	0.292162404221935	1.81979860181331	0.044	0.08	1	ESMs	Scissor_pos_VS_Scissor_neg
KWMTBOMO01567	0.784582443863119	1.81795675766889	0.046	0.04	1	ESMs	Scissor_pos_VS_Scissor_neg
KWMTBOMO05230	0.765204411729942	1.81792020609711	0.186	0.2	1	ESMs	Scissor_pos_VS_Scissor_neg
KWMTBOMO10423	0.362053668502765	1.81738106026198	0.09	0.14	1	ESMs	Scissor_pos_VS_Scissor_neg
KWMTBOMO09305	0.611789721898198	1.81582663957821	0.027	0.04	1	ESMs	Scissor_pos_VS_Scissor_neg
KWMTBOMO05000	3.32784379665626e-08	1.81543816816776	0.816	0.68	0.000561740032875576	ESMs	Scissor_pos_VS_Scissor_neg
KWMTBOMO13084	0.782421485149482	1.81520506642676	0.026	0.02	1	ESMs	Scissor_pos_VS_Scissor_neg
KWMTBOMO10910	0.41049068126903	1.81442550693524	0.013	0	1	ESMs	Scissor_pos_VS_Scissor_neg
KWMTBOMO15168	0.126028688091768	1.81411214041631	0.153	0.08	1	ESMs	Scissor_pos_VS_Scissor_neg
KWMTBOMO01621	0.0209239371235168	1.8134964670675	0.262	0.14	1	ESMs	Scissor_pos_VS_Scissor_neg
KWMTBOMO12731	0.331415741936528	1.8131243216683	0.019	0	1	ESMs	Scissor_pos_VS_Scissor_neg
KWMTBOMO09624	0.579475355880232	1.81267984017184	0.041	0.06	1	ESMs	Scissor_pos_VS_Scissor_neg
KWMTBOMO16104	0.376085885697658	1.81255411263142	0.015	0	1	ESMs	Scissor_pos_VS_Scissor_neg
KWMTBOMO08957	0.864135035774653	1.81061354482183	0.034	0.04	1	ESMs	Scissor_pos_VS_Scissor_neg
KWMTBOMO09745	0.310060870642318	1.8105847600657	0.059	0.1	1	ESMs	Scissor_pos_VS_Scissor_neg
KWMTBOMO04138	0.360355836100777	1.81018612126216	0.017	0	1	ESMs	Scissor_pos_VS_Scissor_neg
KWMTBOMO04600	0.817122458862535	1.8095957059245	0.015	0.02	1	ESMs	Scissor_pos_VS_Scissor_neg
KWMTBOMO06642	0.693515701644089	1.80952175902051	0.045	0.06	1	ESMs	Scissor_pos_VS_Scissor_neg
KWMTBOMO06177	1	1.80834260081993	0.02	0.02	1	ESMs	Scissor_pos_VS_Scissor_neg
KWMTBOMO00522	0.599635235878932	1.80656193560938	0.033	0.02	1	ESMs	Scissor_pos_VS_Scissor_neg
KWMTBOMO09820	0.795134510299046	1.80541177156918	0.032	0.04	1	ESMs	Scissor_pos_VS_Scissor_neg
KWMTBOMO05634	1.74576971984459e-05	1.80518218302591	0.626	0.5	0.294685928709767	ESMs	Scissor_pos_VS_Scissor_neg
KWMTBOMO02453	0.360355836100777	1.80462634818592	0.017	0	1	ESMs	Scissor_pos_VS_Scissor_neg
KWMTBOMO02472	0.360355836100777	1.80442328520068	0.017	0	1	ESMs	Scissor_pos_VS_Scissor_neg
KWMTBOMO09193	0.432563952683523	1.80385082244415	0.051	0.08	1	ESMs	Scissor_pos_VS_Scissor_neg
KWMTBOMO08881	0.31217654745624	1.80282923373681	0.1	0.16	1	ESMs	Scissor_pos_VS_Scissor_neg
KWMTBOMO16432	0.642054783143874	1.80134159215271	0.031	0.02	1	ESMs	Scissor_pos_VS_Scissor_neg
KWMTBOMO07065	0.471250785953517	1.79981701813469	0.01	0	1	ESMs	Scissor_pos_VS_Scissor_neg
KWMTBOMO12612	0.722456821024093	1.79965261888292	0.028	0.02	1	ESMs	Scissor_pos_VS_Scissor_neg
KWMTBOMO15257	0.613585569822951	1.79748360132556	0.119	0.16	1	ESMs	Scissor_pos_VS_Scissor_neg
KWMTBOMO10743	0.383741570963985	1.79692289050564	0.049	0.08	1	ESMs	Scissor_pos_VS_Scissor_neg
KWMTBOMO04672	0.104012611581629	1.7962179286587	0.069	0.14	1	ESMs	Scissor_pos_VS_Scissor_neg
KWMTBOMO12933	0.579475355880232	1.79576406908226	0.041	0.06	1	ESMs	Scissor_pos_VS_Scissor_neg
KWMTBOMO16307	0.166476160120704	1.79322779222101	0.122	0.06	1	ESMs	Scissor_pos_VS_Scissor_neg
KWMTBOMO01576	0.782421485149482	1.79301917526345	0.026	0.02	1	ESMs	Scissor_pos_VS_Scissor_neg
KWMTBOMO03872	0.932767922394337	1.79208541549277	0.071	0.08	1	ESMs	Scissor_pos_VS_Scissor_neg
KWMTBOMO00785	0.358906500964174	1.79151802676314	0.048	0.08	1	ESMs	Scissor_pos_VS_Scissor_neg
KWMTBOMO15100	0.535246548374576	1.78869039195292	0.025	0.04	1	ESMs	Scissor_pos_VS_Scissor_neg
KWMTBOMO16284	0.331415741936528	1.78821830956315	0.019	0	1	ESMs	Scissor_pos_VS_Scissor_neg
KWMTBOMO08636	0.293345324945583	1.78805438636597	0.022	0	1	ESMs	Scissor_pos_VS_Scissor_neg
KWMTBOMO10491	0.694452857352678	1.78744246811014	0.029	0.02	1	ESMs	Scissor_pos_VS_Scissor_neg
KWMTBOMO16316	0.41049068126903	1.78629900096034	0.013	0	1	ESMs	Scissor_pos_VS_Scissor_neg
KWMTBOMO00278	0.169349729235591	1.78448672265673	0.063	0.12	1	ESMs	Scissor_pos_VS_Scissor_neg
KWMTBOMO13529	0.977203523703286	1.78380262653406	0.039	0.04	1	ESMs	Scissor_pos_VS_Scissor_neg
KWMTBOMO06485	0.913965145967201	1.7832116382362	0.018	0.02	1	ESMs	Scissor_pos_VS_Scissor_neg
KWMTBOMO06749	0.496619440438875	1.78209303294758	0.024	0.04	1	ESMs	Scissor_pos_VS_Scissor_neg
KWMTBOMO15572	0.686767636015741	1.78181717464963	0.029	0.04	1	ESMs	Scissor_pos_VS_Scissor_neg
KWMTBOMO08756	0.814535702917129	1.78019443896652	0.025	0.02	1	ESMs	Scissor_pos_VS_Scissor_neg
KWMTBOMO01433	0.87451024875411	1.78006324993073	0.219	0.26	1	ESMs	Scissor_pos_VS_Scissor_neg
KWMTBOMO13068	0.331415741936528	1.77989952931269	0.019	0	1	ESMs	Scissor_pos_VS_Scissor_neg
KWMTBOMO05615	0.848182494138318	1.77753460974864	0.024	0.02	1	ESMs	Scissor_pos_VS_Scissor_neg
KWMTBOMO10777	0.554848450942206	1.77674932845732	0.086	0.12	1	ESMs	Scissor_pos_VS_Scissor_neg
KWMTBOMO15774	0.720903447155469	1.77635747317386	0.046	0.06	1	ESMs	Scissor_pos_VS_Scissor_neg
KWMTBOMO03411	0.360355836100777	1.77621463839009	0.017	0	1	ESMs	Scissor_pos_VS_Scissor_neg
KWMTBOMO16223	0.759004699128635	1.7742815145506	0.031	0.04	1	ESMs	Scissor_pos_VS_Scissor_neg
KWMTBOMO05756	0.293407161940627	1.77361823043378	0.044	0.08	1	ESMs	Scissor_pos_VS_Scissor_neg
KWMTBOMO00551	0.481936710933958	1.77334002297027	0.053	0.08	1	ESMs	Scissor_pos_VS_Scissor_neg
KWMTBOMO08918	0.173507238321151	1.77302678375814	0.293	0.26	1	ESMs	Scissor_pos_VS_Scissor_neg
KWMTBOMO03448	0.814535702917129	1.77226563081797	0.025	0.02	1	ESMs	Scissor_pos_VS_Scissor_neg
KWMTBOMO01232	0.629646206941638	1.77084734911526	0.134	0.18	1	ESMs	Scissor_pos_VS_Scissor_neg
KWMTBOMO16355	0.920442525746097	1.77081088227776	0.022	0.02	1	ESMs	Scissor_pos_VS_Scissor_neg
KWMTBOMO15035	0.372910254550819	1.76761661084001	0.034	0.06	1	ESMs	Scissor_pos_VS_Scissor_neg
KWMTBOMO13199	0.85879596800234	1.76422742455124	0.206	0.24	1	ESMs	Scissor_pos_VS_Scissor_neg
KWMTBOMO03420	0.345490050725336	1.7639608252145	0.018	0	1	ESMs	Scissor_pos_VS_Scissor_neg
KWMTBOMO06418	0.610568960459319	1.76344911452591	0.027	0.04	1	ESMs	Scissor_pos_VS_Scissor_neg
KWMTBOMO08086	0.642054783143874	1.76257018567305	0.031	0.02	1	ESMs	Scissor_pos_VS_Scissor_neg
KWMTBOMO07341	0.866752528287985	1.76228622084534	0.017	0.02	1	ESMs	Scissor_pos_VS_Scissor_neg
KWMTBOMO16062	0.435197462872604	1.76213686303787	0.11	0.08	1	ESMs	Scissor_pos_VS_Scissor_neg
KWMTBOMO02620	0.496619440438875	1.7620085073457	0.024	0.04	1	ESMs	Scissor_pos_VS_Scissor_neg
KWMTBOMO00338	0.984734149854457	1.76145863412213	0.17	0.2	1	ESMs	Scissor_pos_VS_Scissor_neg
KWMTBOMO03604	0.958885365043898	1.76136078956372	0.019	0.02	1	ESMs	Scissor_pos_VS_Scissor_neg
KWMTBOMO11989	0.122506521347965	1.76085710735454	0.059	0.12	1	ESMs	Scissor_pos_VS_Scissor_neg
KWMTBOMO14754	0.0862711539645186	1.76082637124746	0.043	0.1	1	ESMs	Scissor_pos_VS_Scissor_neg
KWMTBOMO08646	0.968690774696921	1.75901610204976	0.143	0.16	1	ESMs	Scissor_pos_VS_Scissor_neg
KWMTBOMO05571	0.880295141761077	1.75675286698279	0.062	0.06	1	ESMs	Scissor_pos_VS_Scissor_neg
KWMTBOMO12387	0.407231641530126	1.75657635314823	0.05	0.08	1	ESMs	Scissor_pos_VS_Scissor_neg
KWMTBOMO12862	0.293345324945583	1.75631412517024	0.022	0	1	ESMs	Scissor_pos_VS_Scissor_neg
KWMTBOMO09290	0.643192674395526	1.75566591434063	0.148	0.14	1	ESMs	Scissor_pos_VS_Scissor_neg
KWMTBOMO08806	0.565071514298643	1.75433915946688	0.071	0.1	1	ESMs	Scissor_pos_VS_Scissor_neg
KWMTBOMO08461	0.534058873027398	1.75408230908904	0.025	0.04	1	ESMs	Scissor_pos_VS_Scissor_neg
KWMTBOMO05606	0.883452531050369	1.75406644337853	0.023	0.02	1	ESMs	Scissor_pos_VS_Scissor_neg
KWMTBOMO09107	0.883452531050369	1.75385200535723	0.023	0.02	1	ESMs	Scissor_pos_VS_Scissor_neg
KWMTBOMO16037	0.254998309077444	1.75293180811053	0.056	0.1	1	ESMs	Scissor_pos_VS_Scissor_neg
KWMTBOMO05897	0.360355836100777	1.75254994199903	0.017	0	1	ESMs	Scissor_pos_VS_Scissor_neg
KWMTBOMO07996	0.383029486051343	1.75147742669294	0.049	0.08	1	ESMs	Scissor_pos_VS_Scissor_neg
KWMTBOMO07904	0.000451267290783217	1.74932287514927	0.487	0.3	1	ESMs	Scissor_pos_VS_Scissor_neg
KWMTBOMO11807	0.384454446753315	1.74922575784157	0.049	0.08	1	ESMs	Scissor_pos_VS_Scissor_neg
KWMTBOMO05836	0.305395789028594	1.74756049413381	0.021	0	1	ESMs	Scissor_pos_VS_Scissor_neg
KWMTBOMO14050	0.596286429683012	1.74699569969162	0.033	0.02	1	ESMs	Scissor_pos_VS_Scissor_neg
KWMTBOMO05231	0.702731192176146	1.74660783481257	0.062	0.08	1	ESMs	Scissor_pos_VS_Scissor_neg
KWMTBOMO12926	0.293345324945583	1.74528305011958	0.022	0	1	ESMs	Scissor_pos_VS_Scissor_neg
KWMTBOMO11178	0.838667254411408	1.74504406212339	0.044	0.04	1	ESMs	Scissor_pos_VS_Scissor_neg
KWMTBOMO06832	0.332411561835211	1.74313237977135	0.128	0.2	1	ESMs	Scissor_pos_VS_Scissor_neg
KWMTBOMO05654	0.785109492012422	1.74274449716575	0.049	0.06	1	ESMs	Scissor_pos_VS_Scissor_neg
KWMTBOMO00727	0.36098013944155	1.74246300925297	0.048	0.08	1	ESMs	Scissor_pos_VS_Scissor_neg
KWMTBOMO11425	0.952375285637462	1.74082180389229	0.072	0.08	1	ESMs	Scissor_pos_VS_Scissor_neg
KWMTBOMO09714	0.000764816048541822	1.73969943249113	0.517	0.38	1	ESMs	Scissor_pos_VS_Scissor_neg
KWMTBOMO14937	0.848182494138318	1.73828311118769	0.024	0.02	1	ESMs	Scissor_pos_VS_Scissor_neg
KWMTBOMO08037	0.0795811501740967	1.73749434599371	0.09	0.18	1	ESMs	Scissor_pos_VS_Scissor_neg
KWMTBOMO16285	0.858554787455043	1.73745317159577	0.063	0.06	1	ESMs	Scissor_pos_VS_Scissor_neg
KWMTBOMO01983	0.488916555228682	1.73723892639968	0.068	0.1	1	ESMs	Scissor_pos_VS_Scissor_neg
KWMTBOMO09122	0.376085885697658	1.73713250549564	0.015	0	1	ESMs	Scissor_pos_VS_Scissor_neg
KWMTBOMO11403	0.514462642956369	1.73693223583444	0.037	0.02	1	ESMs	Scissor_pos_VS_Scissor_neg
KWMTBOMO13127	0.650560041123379	1.73600215867371	0.149	0.2	1	ESMs	Scissor_pos_VS_Scissor_neg
KWMTBOMO05387	0.722456821024093	1.73452226148452	0.028	0.02	1	ESMs	Scissor_pos_VS_Scissor_neg
KWMTBOMO07573	0.0535885248512669	1.73409000515376	0.085	0.18	1	ESMs	Scissor_pos_VS_Scissor_neg
KWMTBOMO09238	0.968958143368214	1.73174192677535	0.094	0.1	1	ESMs	Scissor_pos_VS_Scissor_neg
KWMTBOMO02528	0.080326656829811	1.73144107609722	0.066	0.14	1	ESMs	Scissor_pos_VS_Scissor_neg
KWMTBOMO08312	0.896950733559976	1.73080289945523	0.042	0.04	1	ESMs	Scissor_pos_VS_Scissor_neg
KWMTBOMO09387	0.41049068126903	1.73064452504867	0.013	0	1	ESMs	Scissor_pos_VS_Scissor_neg
KWMTBOMO03261	0.578507114184111	1.73033694241886	0.041	0.06	1	ESMs	Scissor_pos_VS_Scissor_neg
KWMTBOMO15358	0.452514953401765	1.72759995812473	0.052	0.08	1	ESMs	Scissor_pos_VS_Scissor_neg
KWMTBOMO01945	0.782393347447448	1.72732629999769	0.086	0.08	1	ESMs	Scissor_pos_VS_Scissor_neg
KWMTBOMO04117	0.41049068126903	1.72644803207926	0.013	0	1	ESMs	Scissor_pos_VS_Scissor_neg
KWMTBOMO05967	0.250606577577685	1.72184447573007	0.042	0.08	1	ESMs	Scissor_pos_VS_Scissor_neg
KWMTBOMO07642	0.78207320383416	1.71952851610262	0.049	0.06	1	ESMs	Scissor_pos_VS_Scissor_neg
KWMTBOMO08661	0.376085885697658	1.71952054054214	0.015	0	1	ESMs	Scissor_pos_VS_Scissor_neg
KWMTBOMO02855	0.429381362943892	1.71751704064367	0.012	0	1	ESMs	Scissor_pos_VS_Scissor_neg
KWMTBOMO09587	0.449577394001291	1.71682066492585	0.011	0	1	ESMs	Scissor_pos_VS_Scissor_neg
KWMTBOMO10074	0.270511946988147	1.71539906544206	0.07	0.12	1	ESMs	Scissor_pos_VS_Scissor_neg
KWMTBOMO08218	0.404675304747874	1.71334941919271	0.05	0.08	1	ESMs	Scissor_pos_VS_Scissor_neg
KWMTBOMO14263	0.345490050725336	1.71333693155984	0.018	0	1	ESMs	Scissor_pos_VS_Scissor_neg
KWMTBOMO04433	0.490070320985548	1.71259975771861	0.038	0.06	1	ESMs	Scissor_pos_VS_Scissor_neg
KWMTBOMO12865	0.667941812286229	1.71206163318141	0.122	0.16	1	ESMs	Scissor_pos_VS_Scissor_neg
KWMTBOMO00018	0.950533559577786	1.71149059185259	0.106	0.12	1	ESMs	Scissor_pos_VS_Scissor_neg
KWMTBOMO13577	1	1.71071590867086	0.02	0.02	1	ESMs	Scissor_pos_VS_Scissor_neg
KWMTBOMO08251	0.494359380939923	1.7103974863283	0.038	0.02	1	ESMs	Scissor_pos_VS_Scissor_neg
KWMTBOMO11068	2.43360538463308e-09	1.71031513842313	0.8	0.58	4.10792588926063e-05	ESMs	Scissor_pos_VS_Scissor_neg
KWMTBOMO13744	0.593654652496116	1.71027197035459	0.214	0.22	1	ESMs	Scissor_pos_VS_Scissor_neg
KWMTBOMO01340	0.331415741936528	1.70969615202382	0.019	0	1	ESMs	Scissor_pos_VS_Scissor_neg
KWMTBOMO02739	0.392764564161722	1.70936407257415	0.014	0	1	ESMs	Scissor_pos_VS_Scissor_neg
KWMTBOMO12518	0.529238585205409	1.70893848223289	0.099	0.14	1	ESMs	Scissor_pos_VS_Scissor_neg
KWMTBOMO11842	0.938428022717304	1.70869773242549	0.089	0.1	1	ESMs	Scissor_pos_VS_Scissor_neg
KWMTBOMO03788	0.794324531574585	1.70794283741395	0.144	0.18	1	ESMs	Scissor_pos_VS_Scissor_neg
KWMTBOMO00155	0.759625871858421	1.70727095997021	0.031	0.04	1	ESMs	Scissor_pos_VS_Scissor_neg
KWMTBOMO09903	0.273035491763277	1.70635025263606	0.057	0.1	1	ESMs	Scissor_pos_VS_Scissor_neg
KWMTBOMO07366	0.305395789028594	1.70441555836996	0.021	0	1	ESMs	Scissor_pos_VS_Scissor_neg
KWMTBOMO12779	0.411971923766271	1.70422913193839	0.112	0.08	1	ESMs	Scissor_pos_VS_Scissor_neg
KWMTBOMO13797	0.229830704138979	1.7034446750894	0.19	0.14	1	ESMs	Scissor_pos_VS_Scissor_neg
KWMTBOMO16040	0.387325381720831	1.70271285274663	0.063	0.1	1	ESMs	Scissor_pos_VS_Scissor_neg
KWMTBOMO16121	0.270786714170155	1.70233134452123	0.043	0.08	1	ESMs	Scissor_pos_VS_Scissor_neg
KWMTBOMO03564	0.471250785953517	1.7021545220498	0.01	0	1	ESMs	Scissor_pos_VS_Scissor_neg
KWMTBOMO14694	0.318069532256248	1.70207933999831	0.02	0	1	ESMs	Scissor_pos_VS_Scissor_neg
KWMTBOMO06552	0.270943749642976	1.69966367420866	0.024	0	1	ESMs	Scissor_pos_VS_Scissor_neg
KWMTBOMO01385	0.883452526084268	1.69960744467527	0.023	0.02	1	ESMs	Scissor_pos_VS_Scissor_neg
KWMTBOMO05469	0.791883196532018	1.69877662841715	0.158	0.2	1	ESMs	Scissor_pos_VS_Scissor_neg
KWMTBOMO11681	0.845318290248659	1.69868908235087	0.068	0.08	1	ESMs	Scissor_pos_VS_Scissor_neg
KWMTBOMO11649	0.378415171227473	1.69838228222794	0.071	0.04	1	ESMs	Scissor_pos_VS_Scissor_neg
KWMTBOMO08142	0.918477366625392	1.6977949025118	0.041	0.04	1	ESMs	Scissor_pos_VS_Scissor_neg
KWMTBOMO07668	0.250565907555311	1.69691105691014	0.026	0	1	ESMs	Scissor_pos_VS_Scissor_neg
KWMTBOMO05803	0.172960297052583	1.6954462865724	0.051	0.1	1	ESMs	Scissor_pos_VS_Scissor_neg
KWMTBOMO14893	0.643478908280159	1.69514284171249	0.094	0.08	1	ESMs	Scissor_pos_VS_Scissor_neg
KWMTBOMO04632	0.472608507074511	1.69436683226901	0.145	0.12	1	ESMs	Scissor_pos_VS_Scissor_neg
KWMTBOMO09019	0.429381362943892	1.6934049273213	0.012	0	1	ESMs	Scissor_pos_VS_Scissor_neg
KWMTBOMO12310	0.256452167532898	1.69279482279962	0.083	0.14	1	ESMs	Scissor_pos_VS_Scissor_neg
KWMTBOMO12587	0.00312580874575883	1.69241101922675	0.392	0.24	1	ESMs	Scissor_pos_VS_Scissor_neg
KWMTBOMO01365	0.817122458862535	1.69234022824542	0.015	0.02	1	ESMs	Scissor_pos_VS_Scissor_neg
KWMTBOMO11660	0.408330168928135	1.6923201223823	0.05	0.08	1	ESMs	Scissor_pos_VS_Scissor_neg
KWMTBOMO07587	0.457113306911356	1.69225049592566	0.052	0.08	1	ESMs	Scissor_pos_VS_Scissor_neg
KWMTBOMO05753	0.958885365043898	1.69222440473946	0.019	0.02	1	ESMs	Scissor_pos_VS_Scissor_neg
KWMTBOMO05609	0.00928381871106002	1.6914934035306	0.316	0.16	1	ESMs	Scissor_pos_VS_Scissor_neg
KWMTBOMO02745	0.0528134992940246	1.69120248794905	0.376	0.32	1	ESMs	Scissor_pos_VS_Scissor_neg
KWMTBOMO03433	0.650688553038842	1.69103404208754	0.06	0.08	1	ESMs	Scissor_pos_VS_Scissor_neg
KWMTBOMO15711	0.111193136997843	1.69067010786489	0.058	0.12	1	ESMs	Scissor_pos_VS_Scissor_neg
KWMTBOMO05767	0.874112681125207	1.68785729179775	0.18	0.2	1	ESMs	Scissor_pos_VS_Scissor_neg
KWMTBOMO00142	0.345490050725336	1.68784604031265	0.018	0	1	ESMs	Scissor_pos_VS_Scissor_neg
KWMTBOMO10180	0.913965145967201	1.68780134684493	0.018	0.02	1	ESMs	Scissor_pos_VS_Scissor_neg
KWMTBOMO03182	0.913965145967201	1.68752213825104	0.018	0.02	1	ESMs	Scissor_pos_VS_Scissor_neg
KWMTBOMO03944	0.331415741936528	1.68666638179888	0.019	0	1	ESMs	Scissor_pos_VS_Scissor_neg
KWMTBOMO11004	0.867202494113715	1.6821959797202	0.052	0.06	1	ESMs	Scissor_pos_VS_Scissor_neg
KWMTBOMO05483	0.214405709659604	1.68179145317235	0.08	0.14	1	ESMs	Scissor_pos_VS_Scissor_neg
KWMTBOMO04094	0.883452531050369	1.68126247616729	0.023	0.02	1	ESMs	Scissor_pos_VS_Scissor_neg
KWMTBOMO05018	0.868210758424962	1.67995791404957	0.052	0.06	1	ESMs	Scissor_pos_VS_Scissor_neg
KWMTBOMO15486	0.0759761635740814	1.67929753182586	0.208	0.12	1	ESMs	Scissor_pos_VS_Scissor_neg
KWMTBOMO06333	0.489674962113431	1.67912096115841	0.097	0.14	1	ESMs	Scissor_pos_VS_Scissor_neg
KWMTBOMO15501	0.241783266553946	1.67850466696009	0.095	0.16	1	ESMs	Scissor_pos_VS_Scissor_neg
KWMTBOMO08164	0.575606961087494	1.67814553991308	0.041	0.06	1	ESMs	Scissor_pos_VS_Scissor_neg
KWMTBOMO10097	0.552112470796924	1.67690611985575	0.035	0.02	1	ESMs	Scissor_pos_VS_Scissor_neg
KWMTBOMO07731	0.451705327101726	1.67633144334247	0.107	0.08	1	ESMs	Scissor_pos_VS_Scissor_neg
KWMTBOMO06582	0.271981195427864	1.67417357179522	0.043	0.08	1	ESMs	Scissor_pos_VS_Scissor_neg
KWMTBOMO14595	0.215271003965396	1.67405196339825	0.028	0.06	1	ESMs	Scissor_pos_VS_Scissor_neg
KWMTBOMO04003	0.612408493918681	1.67399134594601	0.104	0.14	1	ESMs	Scissor_pos_VS_Scissor_neg
KWMTBOMO15145	0.231041638787154	1.67354432984929	0.041	0.08	1	ESMs	Scissor_pos_VS_Scissor_neg
KWMTBOMO10101	0.410490646081885	1.67350456462509	0.013	0	1	ESMs	Scissor_pos_VS_Scissor_neg
KWMTBOMO02427	0.24955018613286	1.67338021937765	0.108	0.18	1	ESMs	Scissor_pos_VS_Scissor_neg
KWMTBOMO10856	0.360355836100777	1.67261111645147	0.017	0	1	ESMs	Scissor_pos_VS_Scissor_neg
KWMTBOMO01792	0.345490050725336	1.67157389233503	0.018	0	1	ESMs	Scissor_pos_VS_Scissor_neg
KWMTBOMO05905	0.930291202457627	1.67035488331335	0.036	0.04	1	ESMs	Scissor_pos_VS_Scissor_neg
KWMTBOMO14264	0.260518216438139	1.66959972124698	0.025	0	1	ESMs	Scissor_pos_VS_Scissor_neg
KWMTBOMO08050	0.63206902189748	1.66837829002493	0.162	0.22	1	ESMs	Scissor_pos_VS_Scissor_neg
KWMTBOMO08901	0.756324767139369	1.66821872174944	0.064	0.08	1	ESMs	Scissor_pos_VS_Scissor_neg
KWMTBOMO00526	0.883452531050369	1.66810782676486	0.023	0.02	1	ESMs	Scissor_pos_VS_Scissor_neg
KWMTBOMO08006	0.814535702917129	1.66747815550455	0.025	0.02	1	ESMs	Scissor_pos_VS_Scissor_neg
KWMTBOMO00327	0.945787782978602	1.66563232112328	0.196	0.24	1	ESMs	Scissor_pos_VS_Scissor_neg
KWMTBOMO01662	0.18331295934724	1.66525855788633	0.128	0.22	1	ESMs	Scissor_pos_VS_Scissor_neg
KWMTBOMO16017	0.176284338169257	1.66475830650994	0.076	0.14	1	ESMs	Scissor_pos_VS_Scissor_neg
KWMTBOMO08001	0.864135035774653	1.66391623429571	0.034	0.04	1	ESMs	Scissor_pos_VS_Scissor_neg
KWMTBOMO14568	0.479586215898239	1.66347406957109	0.053	0.08	1	ESMs	Scissor_pos_VS_Scissor_neg
KWMTBOMO14196	0.0476330262597801	1.66332358265579	0.05	0.12	1	ESMs	Scissor_pos_VS_Scissor_neg
KWMTBOMO14771	0.782421485149482	1.66306746560897	0.026	0.02	1	ESMs	Scissor_pos_VS_Scissor_neg
KWMTBOMO15451	0.345490050725336	1.6623131225033	0.018	0	1	ESMs	Scissor_pos_VS_Scissor_neg
KWMTBOMO14816	0.811964538378968	1.66226793568186	0.145	0.18	1	ESMs	Scissor_pos_VS_Scissor_neg
KWMTBOMO02823	0.803335103777076	1.66135195292969	0.066	0.08	1	ESMs	Scissor_pos_VS_Scissor_neg
KWMTBOMO09829	0.333051057907114	1.66049746513639	0.088	0.14	1	ESMs	Scissor_pos_VS_Scissor_neg
KWMTBOMO05535	0.345490050725336	1.65980168847723	0.018	0	1	ESMs	Scissor_pos_VS_Scissor_neg
KWMTBOMO14818	0.128558999817152	1.65938080675149	0.024	0.06	1	ESMs	Scissor_pos_VS_Scissor_neg
KWMTBOMO09599	0.874719442921142	1.6585107118053	0.133	0.14	1	ESMs	Scissor_pos_VS_Scissor_neg
KWMTBOMO03253	0.376085885697658	1.65470827132576	0.015	0	1	ESMs	Scissor_pos_VS_Scissor_neg
KWMTBOMO10899	0.607478754332096	1.65333738873267	0.119	0.16	1	ESMs	Scissor_pos_VS_Scissor_neg
KWMTBOMO03956	0.315718160742692	1.65316794014923	0.073	0.12	1	ESMs	Scissor_pos_VS_Scissor_neg
KWMTBOMO05424	0.41049068126903	1.65272880394572	0.013	0	1	ESMs	Scissor_pos_VS_Scissor_neg
KWMTBOMO10408	0.0860526823680559	1.65218182808922	0.032	0.08	1	ESMs	Scissor_pos_VS_Scissor_neg
KWMTBOMO13052	0.429381362943892	1.65183966170303	0.012	0	1	ESMs	Scissor_pos_VS_Scissor_neg
KWMTBOMO12434	0.194335440240955	1.6501729827051	0.065	0.12	1	ESMs	Scissor_pos_VS_Scissor_neg
KWMTBOMO11050	0.360355836100777	1.64981353181316	0.017	0	1	ESMs	Scissor_pos_VS_Scissor_neg
KWMTBOMO13151	0.958885365043898	1.64864827326327	0.019	0.02	1	ESMs	Scissor_pos_VS_Scissor_neg
KWMTBOMO10875	0.490070320985548	1.64832914510864	0.038	0.06	1	ESMs	Scissor_pos_VS_Scissor_neg
KWMTBOMO00829	0.826275306461808	1.64820023518727	0.033	0.04	1	ESMs	Scissor_pos_VS_Scissor_neg
KWMTBOMO15794	0.913965145967201	1.64806798823253	0.018	0.02	1	ESMs	Scissor_pos_VS_Scissor_neg
KWMTBOMO09212	0.380968781466882	1.64769617309722	0.119	0.18	1	ESMs	Scissor_pos_VS_Scissor_neg
KWMTBOMO13734	0.392764564161722	1.64744223668488	0.014	0	1	ESMs	Scissor_pos_VS_Scissor_neg
KWMTBOMO04006	0.32466797218802	1.64614889472803	0.178	0.28	1	ESMs	Scissor_pos_VS_Scissor_neg
KWMTBOMO14591	0.382318230171372	1.64584948636493	0.049	0.08	1	ESMs	Scissor_pos_VS_Scissor_neg
KWMTBOMO02015	0.762798401990667	1.64357213408378	0.215	0.24	1	ESMs	Scissor_pos_VS_Scissor_neg
KWMTBOMO06331	0.535246548374576	1.64253483271014	0.025	0.04	1	ESMs	Scissor_pos_VS_Scissor_neg
KWMTBOMO01994	0.486733478987922	1.64226441920236	0.177	0.16	1	ESMs	Scissor_pos_VS_Scissor_neg
KWMTBOMO06457	0.295575806752154	1.64215841303388	0.099	0.16	1	ESMs	Scissor_pos_VS_Scissor_neg
KWMTBOMO05437	0.896950733559976	1.64026005928863	0.042	0.04	1	ESMs	Scissor_pos_VS_Scissor_neg
KWMTBOMO01129	0.291794402673215	1.63970821342604	0.144	0.1	1	ESMs	Scissor_pos_VS_Scissor_neg
KWMTBOMO08232	0.608377093860039	1.63960497183752	0.042	0.06	1	ESMs	Scissor_pos_VS_Scissor_neg
KWMTBOMO04997	0.553157776373021	1.63933798283207	0.035	0.02	1	ESMs	Scissor_pos_VS_Scissor_neg
KWMTBOMO07906	0.345490050725336	1.63741451238699	0.018	0	1	ESMs	Scissor_pos_VS_Scissor_neg
KWMTBOMO13850	0.340556290290262	1.6373509267125	0.177	0.14	1	ESMs	Scissor_pos_VS_Scissor_neg
KWMTBOMO06639	0.118854347630482	1.63701940068581	0.046	0.1	1	ESMs	Scissor_pos_VS_Scissor_neg
KWMTBOMO11723	0.861678270098878	1.63672731205506	0.034	0.04	1	ESMs	Scissor_pos_VS_Scissor_neg
KWMTBOMO14844	0.883452531050369	1.63647236076373	0.023	0.02	1	ESMs	Scissor_pos_VS_Scissor_neg
KWMTBOMO12104	0.549596470926529	1.6356145336902	0.04	0.06	1	ESMs	Scissor_pos_VS_Scissor_neg
KWMTBOMO13601	0.36423165419906	1.63482736642133	0.062	0.1	1	ESMs	Scissor_pos_VS_Scissor_neg
KWMTBOMO02123	0.376530792897516	1.63295623916841	0.076	0.12	1	ESMs	Scissor_pos_VS_Scissor_neg
KWMTBOMO00901	0.126603844927532	1.63225644114145	0.226	0.16	1	ESMs	Scissor_pos_VS_Scissor_neg
KWMTBOMO08422	0.250565907555311	1.63203246619833	0.026	0	1	ESMs	Scissor_pos_VS_Scissor_neg
KWMTBOMO15978	0.194724791156707	1.63198874344322	0.065	0.12	1	ESMs	Scissor_pos_VS_Scissor_neg
KWMTBOMO10380	0.20771938734621	1.63185351962098	0.13	0.22	1	ESMs	Scissor_pos_VS_Scissor_neg
KWMTBOMO01519	0.460456231267561	1.63102377539373	0.18	0.16	1	ESMs	Scissor_pos_VS_Scissor_neg
KWMTBOMO04542	0.754773047219358	1.63083918457793	0.081	0.1	1	ESMs	Scissor_pos_VS_Scissor_neg
KWMTBOMO00671	0.814617453753721	1.63053747424163	0.16	0.2	1	ESMs	Scissor_pos_VS_Scissor_neg
KWMTBOMO11972	0.504434029763831	1.63050996962936	0.155	0.22	1	ESMs	Scissor_pos_VS_Scissor_neg
KWMTBOMO00474	0.476934005206604	1.63047496009525	0.112	0.16	1	ESMs	Scissor_pos_VS_Scissor_neg
KWMTBOMO09654	0.57753963359493	1.62961098035027	0.041	0.06	1	ESMs	Scissor_pos_VS_Scissor_neg
KWMTBOMO02251	0.688488859529224	1.62907247162291	0.111	0.1	1	ESMs	Scissor_pos_VS_Scissor_neg
KWMTBOMO13773	0.75838369640331	1.62854403545831	0.031	0.04	1	ESMs	Scissor_pos_VS_Scissor_neg
KWMTBOMO03888	0.457910894162888	1.62845713550191	0.023	0.04	1	ESMs	Scissor_pos_VS_Scissor_neg
KWMTBOMO10949	0.20971658545407	1.62818857924952	0.066	0.12	1	ESMs	Scissor_pos_VS_Scissor_neg
KWMTBOMO14683	0.814535702917129	1.62630640444819	0.025	0.02	1	ESMs	Scissor_pos_VS_Scissor_neg
KWMTBOMO09201	0.724949173628524	1.62617995725526	0.14	0.18	1	ESMs	Scissor_pos_VS_Scissor_neg
KWMTBOMO03965	0.345490050725336	1.62617385575384	0.018	0	1	ESMs	Scissor_pos_VS_Scissor_neg
KWMTBOMO14426	0.373737807083094	1.62565764246707	0.034	0.06	1	ESMs	Scissor_pos_VS_Scissor_neg
KWMTBOMO04802	0.238751762018992	1.62547850945646	0.068	0.12	1	ESMs	Scissor_pos_VS_Scissor_neg
KWMTBOMO02103	0.722456821024093	1.6247486937483	0.028	0.02	1	ESMs	Scissor_pos_VS_Scissor_neg
KWMTBOMO07356	0.837076756711259	1.62377522500122	0.132	0.16	1	ESMs	Scissor_pos_VS_Scissor_neg
KWMTBOMO01395	1	1.62344756008163	0.02	0.02	1	ESMs	Scissor_pos_VS_Scissor_neg
KWMTBOMO03006	0.308927817184988	1.62282763483338	0.059	0.1	1	ESMs	Scissor_pos_VS_Scissor_neg
KWMTBOMO09671	0.41049068126903	1.62115436510351	0.013	0	1	ESMs	Scissor_pos_VS_Scissor_neg
KWMTBOMO15961	0.764953097168224	1.61998284681507	0.014	0.02	1	ESMs	Scissor_pos_VS_Scissor_neg
KWMTBOMO00019	0.460544912217615	1.61887953624823	0.037	0.06	1	ESMs	Scissor_pos_VS_Scissor_neg
KWMTBOMO05748	0.549596461366593	1.61794712811846	0.04	0.06	1	ESMs	Scissor_pos_VS_Scissor_neg
KWMTBOMO07057	0.211613736702326	1.61692453972223	0.04	0.08	1	ESMs	Scissor_pos_VS_Scissor_neg
KWMTBOMO12134	0.764953097168224	1.61685879292012	0.014	0.02	1	ESMs	Scissor_pos_VS_Scissor_neg
KWMTBOMO05501	0.429381362943892	1.61604030204501	0.012	0	1	ESMs	Scissor_pos_VS_Scissor_neg
KWMTBOMO12092	0.0833633441515028	1.61524016541895	0.055	0.12	1	ESMs	Scissor_pos_VS_Scissor_neg
KWMTBOMO06962	0.693854647948254	1.61408386563489	0.094	0.12	1	ESMs	Scissor_pos_VS_Scissor_neg
KWMTBOMO00068	0.518836367809662	1.6136866797492	0.039	0.06	1	ESMs	Scissor_pos_VS_Scissor_neg
KWMTBOMO00200	0.864135035774653	1.61348045368793	0.034	0.04	1	ESMs	Scissor_pos_VS_Scissor_neg
KWMTBOMO01707	0.923643530078327	1.61330558324315	0.177	0.2	1	ESMs	Scissor_pos_VS_Scissor_neg
KWMTBOMO10229	0.62772675916264	1.61302935510174	0.075	0.06	1	ESMs	Scissor_pos_VS_Scissor_neg
KWMTBOMO11688	0.218243121291153	1.61240788190535	0.054	0.1	1	ESMs	Scissor_pos_VS_Scissor_neg
KWMTBOMO02091	0.478022700569814	1.61123799603233	0.053	0.08	1	ESMs	Scissor_pos_VS_Scissor_neg
KWMTBOMO13077	0.345490050725336	1.6110639882013	0.018	0	1	ESMs	Scissor_pos_VS_Scissor_neg
KWMTBOMO08204	0.989029068788877	1.6102993490684	0.092	0.1	1	ESMs	Scissor_pos_VS_Scissor_neg
KWMTBOMO06731	0.457910894162888	1.60967786121874	0.023	0.04	1	ESMs	Scissor_pos_VS_Scissor_neg
KWMTBOMO02915	0.913965145967201	1.60963970974662	0.018	0.02	1	ESMs	Scissor_pos_VS_Scissor_neg
KWMTBOMO01531	0.596286429683012	1.60714641588509	0.033	0.02	1	ESMs	Scissor_pos_VS_Scissor_neg
KWMTBOMO06195	0.167449119273614	1.60710202812401	0.183	0.12	1	ESMs	Scissor_pos_VS_Scissor_neg
KWMTBOMO11211	0.695717560975625	1.60706622141719	0.029	0.02	1	ESMs	Scissor_pos_VS_Scissor_neg
KWMTBOMO12744	0.223580546542614	1.60571724960318	0.067	0.12	1	ESMs	Scissor_pos_VS_Scissor_neg
KWMTBOMO11256	0.193469164161898	1.60560166547685	0.344	0.34	1	ESMs	Scissor_pos_VS_Scissor_neg
KWMTBOMO10143	0.710132708729652	1.60548146278047	0.013	0.02	1	ESMs	Scissor_pos_VS_Scissor_neg
KWMTBOMO11398	0.814535702917129	1.60452922782391	0.025	0.02	1	ESMs	Scissor_pos_VS_Scissor_neg
KWMTBOMO16241	0.472427061831443	1.60438285337324	0.067	0.1	1	ESMs	Scissor_pos_VS_Scissor_neg
KWMTBOMO12351	0.930291204338514	1.60355976278123	0.036	0.04	1	ESMs	Scissor_pos_VS_Scissor_neg
KWMTBOMO07945	0.81337290717478	1.60072088528234	0.188	0.24	1	ESMs	Scissor_pos_VS_Scissor_neg
KWMTBOMO01962	0.583025851879793	1.59988642460309	0.117	0.16	1	ESMs	Scissor_pos_VS_Scissor_neg
KWMTBOMO09180	0.920442525746097	1.59669638515742	0.022	0.02	1	ESMs	Scissor_pos_VS_Scissor_neg
KWMTBOMO05876	0.345490050725336	1.59652611414763	0.018	0	1	ESMs	Scissor_pos_VS_Scissor_neg
KWMTBOMO09473	0.722247592388776	1.59647217185156	0.03	0.04	1	ESMs	Scissor_pos_VS_Scissor_neg
KWMTBOMO06596	0.373737820354807	1.59621270265206	0.034	0.06	1	ESMs	Scissor_pos_VS_Scissor_neg
KWMTBOMO05206	0.164225250513439	1.59567819613732	0.24	0.18	1	ESMs	Scissor_pos_VS_Scissor_neg
KWMTBOMO00774	0.318069532256248	1.59405405127505	0.02	0	1	ESMs	Scissor_pos_VS_Scissor_neg
KWMTBOMO06724	0.315284560067027	1.5929958731354	0.087	0.14	1	ESMs	Scissor_pos_VS_Scissor_neg
KWMTBOMO01118	0.753001873159124	1.59265423512271	0.187	0.2	1	ESMs	Scissor_pos_VS_Scissor_neg
KWMTBOMO15301	0.535246548374576	1.59261077827768	0.025	0.04	1	ESMs	Scissor_pos_VS_Scissor_neg
KWMTBOMO02320	0.0481635500559147	1.59259009999954	0.084	0.18	1	ESMs	Scissor_pos_VS_Scissor_neg
KWMTBOMO10732	0.460094319461485	1.59153679227713	0.037	0.06	1	ESMs	Scissor_pos_VS_Scissor_neg
KWMTBOMO05266	0.639190738867045	1.59121538835675	0.043	0.06	1	ESMs	Scissor_pos_VS_Scissor_neg
KWMTBOMO00516	0.710132708729652	1.59096253818078	0.013	0.02	1	ESMs	Scissor_pos_VS_Scissor_neg
KWMTBOMO00195	0.610568960459319	1.59061780823633	0.027	0.04	1	ESMs	Scissor_pos_VS_Scissor_neg
KWMTBOMO11200	0.233075907084232	1.5905234302099	0.223	0.18	1	ESMs	Scissor_pos_VS_Scissor_neg
KWMTBOMO02074	0.535246548374576	1.59040948316283	0.025	0.04	1	ESMs	Scissor_pos_VS_Scissor_neg
KWMTBOMO08766	0.507596873874631	1.59029653074968	0.069	0.1	1	ESMs	Scissor_pos_VS_Scissor_neg
KWMTBOMO06052	0.270925877973135	1.59014469483486	0.057	0.1	1	ESMs	Scissor_pos_VS_Scissor_neg
KWMTBOMO15525	0.97954108206124	1.58724666850695	0.039	0.04	1	ESMs	Scissor_pos_VS_Scissor_neg
KWMTBOMO13685	0.921997447205528	1.58693401390244	0.022	0.02	1	ESMs	Scissor_pos_VS_Scissor_neg
KWMTBOMO11311	0.753037374172789	1.58663342337867	0.088	0.08	1	ESMs	Scissor_pos_VS_Scissor_neg
KWMTBOMO10055	0.657559156507786	1.5837398300235	0.06	0.08	1	ESMs	Scissor_pos_VS_Scissor_neg
KWMTBOMO11590	0.433823807825217	1.58362794720371	0.094	0.14	1	ESMs	Scissor_pos_VS_Scissor_neg
KWMTBOMO10209	0.360355836100777	1.58298676945871	0.017	0	1	ESMs	Scissor_pos_VS_Scissor_neg
KWMTBOMO12000	0.179958216714717	1.58287040430244	0.161	0.1	1	ESMs	Scissor_pos_VS_Scissor_neg
KWMTBOMO07000	0.759625871858421	1.58235149323559	0.031	0.04	1	ESMs	Scissor_pos_VS_Scissor_neg
KWMTBOMO12484	0.829980178507521	1.58148172618254	0.033	0.04	1	ESMs	Scissor_pos_VS_Scissor_neg
KWMTBOMO13566	0.0696776143026099	1.58113393560403	0.076	0.16	1	ESMs	Scissor_pos_VS_Scissor_neg
KWMTBOMO08864	0.0643898234642589	1.58019748145616	0.075	0.16	1	ESMs	Scissor_pos_VS_Scissor_neg
KWMTBOMO15285	0.498162453043627	1.57869078032344	0.038	0.02	1	ESMs	Scissor_pos_VS_Scissor_neg
KWMTBOMO04816	0.534058873027398	1.57795637692028	0.025	0.04	1	ESMs	Scissor_pos_VS_Scissor_neg
KWMTBOMO10525	0.285102640187738	1.5775340869527	0.071	0.12	1	ESMs	Scissor_pos_VS_Scissor_neg
KWMTBOMO10368	0.920841475180454	1.57615098006313	0.167	0.2	1	ESMs	Scissor_pos_VS_Scissor_neg
KWMTBOMO14019	0.305545099025192	1.5753243769787	0.059	0.1	1	ESMs	Scissor_pos_VS_Scissor_neg
KWMTBOMO13440	0.958674023409002	1.57526970294008	0.037	0.04	1	ESMs	Scissor_pos_VS_Scissor_neg
KWMTBOMO04991	0.119478577961989	1.57455834332541	0.046	0.1	1	ESMs	Scissor_pos_VS_Scissor_neg
KWMTBOMO02846	0.623719610196217	1.57444105214183	0.163	0.22	1	ESMs	Scissor_pos_VS_Scissor_neg
KWMTBOMO05261	0.913965145967201	1.5743579820003	0.018	0.02	1	ESMs	Scissor_pos_VS_Scissor_neg
KWMTBOMO11020	0.0258557666078294	1.57324006111291	0.432	0.4	1	ESMs	Scissor_pos_VS_Scissor_neg
KWMTBOMO06880	0.315411996161993	1.57224409487869	0.045	0.08	1	ESMs	Scissor_pos_VS_Scissor_neg
KWMTBOMO10190	1	1.57083145774764	0.02	0.02	1	ESMs	Scissor_pos_VS_Scissor_neg
KWMTBOMO04934	0.129279246511078	1.57012745132156	0.048	0.1	1	ESMs	Scissor_pos_VS_Scissor_neg
KWMTBOMO12049	0.870482201195506	1.56781975531428	0.15	0.16	1	ESMs	Scissor_pos_VS_Scissor_neg
KWMTBOMO11701	0.360355836100777	1.5677267886079	0.017	0	1	ESMs	Scissor_pos_VS_Scissor_neg
KWMTBOMO03980	0.580832707653413	1.56532098063251	0.215	0.22	1	ESMs	Scissor_pos_VS_Scissor_neg
KWMTBOMO10112	0.294723874193483	1.56519085404849	0.086	0.14	1	ESMs	Scissor_pos_VS_Scissor_neg
KWMTBOMO01228	0.0744917733429474	1.56493954959232	0.031	0.08	1	ESMs	Scissor_pos_VS_Scissor_neg
KWMTBOMO02469	0.392764564161722	1.56376782432161	0.014	0	1	ESMs	Scissor_pos_VS_Scissor_neg
KWMTBOMO10152	0.896357715243611	1.56357444703677	0.035	0.04	1	ESMs	Scissor_pos_VS_Scissor_neg
KWMTBOMO01694	0.285831367724593	1.56328816309464	0.151	0.24	1	ESMs	Scissor_pos_VS_Scissor_neg
KWMTBOMO14922	0.380382972696346	1.5631371324171	0.063	0.1	1	ESMs	Scissor_pos_VS_Scissor_neg
KWMTBOMO05283	0.722247592388776	1.56310537369014	0.03	0.04	1	ESMs	Scissor_pos_VS_Scissor_neg
KWMTBOMO05849	0.471250785953517	1.56214664439028	0.01	0	1	ESMs	Scissor_pos_VS_Scissor_neg
KWMTBOMO15216	0.0292491877375947	1.56207692563067	0.226	0.1	1	ESMs	Scissor_pos_VS_Scissor_neg
KWMTBOMO04296	0.215680761109979	1.56170573147172	0.093	0.16	1	ESMs	Scissor_pos_VS_Scissor_neg
KWMTBOMO07785	0.195114707339844	1.56108568040257	0.065	0.12	1	ESMs	Scissor_pos_VS_Scissor_neg
KWMTBOMO01851	0.569785207264152	1.55951427668378	0.217	0.22	1	ESMs	Scissor_pos_VS_Scissor_neg
KWMTBOMO11294	0.678882286451526	1.55936187508315	0.061	0.08	1	ESMs	Scissor_pos_VS_Scissor_neg
KWMTBOMO13884	0.142635458199579	1.55850994738339	0.061	0.12	1	ESMs	Scissor_pos_VS_Scissor_neg
KWMTBOMO06125	0.268286368382305	1.55763086923584	0.254	0.22	1	ESMs	Scissor_pos_VS_Scissor_neg
KWMTBOMO09548	0.358216955512442	1.5571728463876	0.048	0.08	1	ESMs	Scissor_pos_VS_Scissor_neg
KWMTBOMO10900	0.107131454327828	1.5558770401662	0.045	0.1	1	ESMs	Scissor_pos_VS_Scissor_neg
KWMTBOMO05057	0.535246548374576	1.55555439344542	0.025	0.04	1	ESMs	Scissor_pos_VS_Scissor_neg
KWMTBOMO04446	0.116729824070858	1.55440601423125	0.12	0.22	1	ESMs	Scissor_pos_VS_Scissor_neg
KWMTBOMO00549	1	1.55285026736637	0.02	0.02	1	ESMs	Scissor_pos_VS_Scissor_neg
KWMTBOMO04012	0.83094227632763	1.55247154288571	0.1	0.12	1	ESMs	Scissor_pos_VS_Scissor_neg
KWMTBOMO14040	0.84174224081538	1.55232187161649	0.119	0.12	1	ESMs	Scissor_pos_VS_Scissor_neg
KWMTBOMO15868	0.851124170031965	1.55227248835525	0.024	0.02	1	ESMs	Scissor_pos_VS_Scissor_neg
KWMTBOMO10483	0.759625871858421	1.5509060411061	0.031	0.04	1	ESMs	Scissor_pos_VS_Scissor_neg
KWMTBOMO12174	0.271064134238216	1.55087807092032	0.111	0.18	1	ESMs	Scissor_pos_VS_Scissor_neg
KWMTBOMO13985	0.866752528287985	1.55085438681064	0.017	0.02	1	ESMs	Scissor_pos_VS_Scissor_neg
KWMTBOMO04210	0.392764564161722	1.54944577747822	0.014	0	1	ESMs	Scissor_pos_VS_Scissor_neg
KWMTBOMO07470	1	1.54923633160573	0.02	0.02	1	ESMs	Scissor_pos_VS_Scissor_neg
KWMTBOMO04024	0.710132708729652	1.54919533026903	0.013	0.02	1	ESMs	Scissor_pos_VS_Scissor_neg
KWMTBOMO10221	0.563189023842366	1.54672229549879	0.131	0.18	1	ESMs	Scissor_pos_VS_Scissor_neg
KWMTBOMO07402	0.380831289215931	1.54612321832773	0.021	0.04	1	ESMs	Scissor_pos_VS_Scissor_neg
KWMTBOMO10619	0.853658765876195	1.5456840174144	0.134	0.16	1	ESMs	Scissor_pos_VS_Scissor_neg
KWMTBOMO04425	0.431287427654846	1.54438415717765	0.065	0.1	1	ESMs	Scissor_pos_VS_Scissor_neg
KWMTBOMO02221	0.449577394001291	1.54399466133293	0.011	0	1	ESMs	Scissor_pos_VS_Scissor_neg
KWMTBOMO10347	0.180557951255916	1.54381609247101	0.102	0.18	1	ESMs	Scissor_pos_VS_Scissor_neg
KWMTBOMO04194	0.429381362943892	1.54359551500647	0.012	0	1	ESMs	Scissor_pos_VS_Scissor_neg
KWMTBOMO00900	0.19185232963858	1.54334186266428	0.027	0.06	1	ESMs	Scissor_pos_VS_Scissor_neg
KWMTBOMO15001	0.897577451266736	1.54225254307229	0.035	0.04	1	ESMs	Scissor_pos_VS_Scissor_neg
KWMTBOMO03057	0.534058873027398	1.54178036535308	0.025	0.04	1	ESMs	Scissor_pos_VS_Scissor_neg
KWMTBOMO16353	0.571547204255039	1.54169710955114	0.072	0.1	1	ESMs	Scissor_pos_VS_Scissor_neg
KWMTBOMO14657	0.866752528287985	1.5416036434822	0.017	0.02	1	ESMs	Scissor_pos_VS_Scissor_neg
KWMTBOMO12171	0.0892808712113175	1.54104806193818	0.118	0.04	1	ESMs	Scissor_pos_VS_Scissor_neg
KWMTBOMO02172	0.163841457630271	1.54034065881165	0.075	0.14	1	ESMs	Scissor_pos_VS_Scissor_neg
KWMTBOMO15127	0.357430278686168	1.53768578320807	0.075	0.12	1	ESMs	Scissor_pos_VS_Scissor_neg
KWMTBOMO04543	0.0601803368519924	1.53751777098984	0.052	0.12	1	ESMs	Scissor_pos_VS_Scissor_neg
KWMTBOMO11474	0.281874370217714	1.53722	0.023	0	1	ESMs	Scissor_pos_VS_Scissor_neg
KWMTBOMO16325	0.428143521015605	1.53695909305461	0.09	0.06	1	ESMs	Scissor_pos_VS_Scissor_neg
KWMTBOMO09276	0.81725906128898	1.53590119863894	0.199	0.22	1	ESMs	Scissor_pos_VS_Scissor_neg
KWMTBOMO07893	0.790177621754138	1.53559594422571	0.032	0.04	1	ESMs	Scissor_pos_VS_Scissor_neg
KWMTBOMO07491	0.228326925362726	1.53549802585163	0.041	0.08	1	ESMs	Scissor_pos_VS_Scissor_neg
KWMTBOMO15713	0.794514436217103	1.53447326082988	0.032	0.04	1	ESMs	Scissor_pos_VS_Scissor_neg
KWMTBOMO11763	0.974735591263968	1.53426952161477	0.174	0.2	1	ESMs	Scissor_pos_VS_Scissor_neg
KWMTBOMO15320	0.90828265495142	1.53419122948566	0.054	0.06	1	ESMs	Scissor_pos_VS_Scissor_neg
KWMTBOMO05303	0.152089239909195	1.53336777946928	0.191	0.12	1	ESMs	Scissor_pos_VS_Scissor_neg
KWMTBOMO15986	0.119656383761758	1.53267375669218	0.157	0.08	1	ESMs	Scissor_pos_VS_Scissor_neg
KWMTBOMO09084	0.3821082989128	1.53250695830433	0.077	0.12	1	ESMs	Scissor_pos_VS_Scissor_neg
KWMTBOMO11253	0.535246548374576	1.53055881754186	0.025	0.04	1	ESMs	Scissor_pos_VS_Scissor_neg
KWMTBOMO12566	0.00066915998027618	1.53044460639682	0.385	0.14	1	ESMs	Scissor_pos_VS_Scissor_neg
KWMTBOMO00326	0.883452531050369	1.52802584890699	0.023	0.02	1	ESMs	Scissor_pos_VS_Scissor_neg
KWMTBOMO06306	0.297232824571264	1.52756165063172	0.249	0.22	1	ESMs	Scissor_pos_VS_Scissor_neg
KWMTBOMO16599	0.496619440438875	1.52745860210452	0.024	0.04	1	ESMs	Scissor_pos_VS_Scissor_neg
KWMTBOMO16276	0.392764564161722	1.52553541284336	0.014	0	1	ESMs	Scissor_pos_VS_Scissor_neg
KWMTBOMO04061	0.0532941343094147	1.52524738428275	0.314	0.22	1	ESMs	Scissor_pos_VS_Scissor_neg
KWMTBOMO00021	0.345490050725336	1.52494899681738	0.018	0	1	ESMs	Scissor_pos_VS_Scissor_neg
KWMTBOMO11352	0.448895342091524	1.52417455082301	0.2	0.3	1	ESMs	Scissor_pos_VS_Scissor_neg
KWMTBOMO00618	0.449577394001291	1.52399194032884	0.011	0	1	ESMs	Scissor_pos_VS_Scissor_neg
KWMTBOMO01204	0.0154160519273224	1.52372467654331	0.294	0.14	1	ESMs	Scissor_pos_VS_Scissor_neg
KWMTBOMO03413	0.231041638787154	1.52295106962167	0.041	0.08	1	ESMs	Scissor_pos_VS_Scissor_neg
KWMTBOMO04169	0.848182494138318	1.52279289340909	0.024	0.02	1	ESMs	Scissor_pos_VS_Scissor_neg
KWMTBOMO01177	0.480628077499759	1.52237531015139	0.145	0.12	1	ESMs	Scissor_pos_VS_Scissor_neg
KWMTBOMO13095	0.131936041002564	1.52237028069373	0.048	0.1	1	ESMs	Scissor_pos_VS_Scissor_neg
KWMTBOMO11586	0.153354596083971	1.52217595591228	0.205	0.14	1	ESMs	Scissor_pos_VS_Scissor_neg
KWMTBOMO07244	0.0846178061933145	1.52182298573001	0.115	0.22	1	ESMs	Scissor_pos_VS_Scissor_neg
KWMTBOMO07603	0.499496893671255	1.52075467501426	0.126	0.18	1	ESMs	Scissor_pos_VS_Scissor_neg
KWMTBOMO08610	0.883452531050369	1.52065037597387	0.023	0.02	1	ESMs	Scissor_pos_VS_Scissor_neg
KWMTBOMO11434	0.36098013944155	1.51831421047534	0.048	0.08	1	ESMs	Scissor_pos_VS_Scissor_neg
KWMTBOMO08767	0.271981184902771	1.51790619218646	0.043	0.08	1	ESMs	Scissor_pos_VS_Scissor_neg
KWMTBOMO02237	0.457910894162888	1.51724811088555	0.023	0.04	1	ESMs	Scissor_pos_VS_Scissor_neg
KWMTBOMO00273	0.644430229158021	1.51673311708561	0.031	0.02	1	ESMs	Scissor_pos_VS_Scissor_neg
KWMTBOMO11195	0.265041398936023	1.51615475265318	0.03	0.06	1	ESMs	Scissor_pos_VS_Scissor_neg
KWMTBOMO02694	0.405346051178518	1.51601429109643	0.092	0.06	1	ESMs	Scissor_pos_VS_Scissor_neg
KWMTBOMO09435	0.535246548374576	1.51578452985849	0.025	0.04	1	ESMs	Scissor_pos_VS_Scissor_neg
KWMTBOMO04503	0.136797322798449	1.51564856761716	0.013	0.04	1	ESMs	Scissor_pos_VS_Scissor_neg
KWMTBOMO02433	0.98664957848415	1.51547552969139	0.111	0.12	1	ESMs	Scissor_pos_VS_Scissor_neg
KWMTBOMO10817	0.0517094221525669	1.51388627306387	0.039	0.1	1	ESMs	Scissor_pos_VS_Scissor_neg
KWMTBOMO11306	0.406134896729807	1.51372900645255	0.05	0.08	1	ESMs	Scissor_pos_VS_Scissor_neg
KWMTBOMO11508	0.284367110538451	1.51325704369568	0.071	0.12	1	ESMs	Scissor_pos_VS_Scissor_neg
KWMTBOMO14097	0.192935285948809	1.51164265381763	0.039	0.08	1	ESMs	Scissor_pos_VS_Scissor_neg
KWMTBOMO02693	0.126451964556801	1.5108764990394	0.035	0.08	1	ESMs	Scissor_pos_VS_Scissor_neg
KWMTBOMO08928	0.362378686612833	1.51083689377603	0.103	0.16	1	ESMs	Scissor_pos_VS_Scissor_neg
KWMTBOMO12042	0.110066288453371	1.51060942925625	0.023	0.06	1	ESMs	Scissor_pos_VS_Scissor_neg
KWMTBOMO11254	0.981025380698986	1.51015551348041	0.262	0.34	1	ESMs	Scissor_pos_VS_Scissor_neg
KWMTBOMO07370	0.109600063632825	1.50958920270979	0.058	0.12	1	ESMs	Scissor_pos_VS_Scissor_neg
KWMTBOMO04565	0.723921674090673	1.50935935931477	0.046	0.06	1	ESMs	Scissor_pos_VS_Scissor_neg
KWMTBOMO04880	0.0206257537592385	1.50907666910914	0.371	0.26	1	ESMs	Scissor_pos_VS_Scissor_neg
KWMTBOMO00315	0.477241989171394	1.50807089179305	0.053	0.08	1	ESMs	Scissor_pos_VS_Scissor_neg
KWMTBOMO03114	0.329086758811505	1.50660203433806	0.074	0.12	1	ESMs	Scissor_pos_VS_Scissor_neg
KWMTBOMO00486	0.149505012340493	1.50563657303376	0.074	0.14	1	ESMs	Scissor_pos_VS_Scissor_neg
KWMTBOMO15392	0.782421485149482	1.50398298640997	0.026	0.02	1	ESMs	Scissor_pos_VS_Scissor_neg
KWMTBOMO08871	0.345490050725336	1.5038416973077	0.018	0	1	ESMs	Scissor_pos_VS_Scissor_neg
KWMTBOMO15564	0.43193148748721	1.50210313798622	0.042	0.02	1	ESMs	Scissor_pos_VS_Scissor_neg
KWMTBOMO06178	0.364871680469388	1.50195055440162	0.17	0.26	1	ESMs	Scissor_pos_VS_Scissor_neg
KWMTBOMO05356	0.92787305470985	1.50177397907985	0.036	0.04	1	ESMs	Scissor_pos_VS_Scissor_neg
KWMTBOMO03978	0.131759558249824	1.50175596557052	0.06	0.12	1	ESMs	Scissor_pos_VS_Scissor_neg
KWMTBOMO02216	0.140569110383843	1.50144686329326	0.111	0.2	1	ESMs	Scissor_pos_VS_Scissor_neg
KWMTBOMO14239	0.237500733946306	1.50143999003291	0.055	0.1	1	ESMs	Scissor_pos_VS_Scissor_neg
KWMTBOMO10564	0.318104022703821	1.50125629775117	0.032	0.06	1	ESMs	Scissor_pos_VS_Scissor_neg
KWMTBOMO03566	0.0447543424468187	1.50033156578666	0.038	0.1	1	ESMs	Scissor_pos_VS_Scissor_neg
KWMTBOMO05046	0.000135707954301197	1.50006677685377	0.293	0.04	1	ESMs	Scissor_pos_VS_Scissor_neg
KWMTBOMO10170	0.913965145967201	1.49861958124838	0.018	0.02	1	ESMs	Scissor_pos_VS_Scissor_neg
KWMTBOMO01102	0.376085885697658	1.49850181657375	0.015	0	1	ESMs	Scissor_pos_VS_Scissor_neg
KWMTBOMO00236	0.604464320324962	1.49829857984726	0.042	0.06	1	ESMs	Scissor_pos_VS_Scissor_neg
KWMTBOMO01883	0.249305248014154	1.49728794840481	0.152	0.1	1	ESMs	Scissor_pos_VS_Scissor_neg
KWMTBOMO03439	0.313296417404113	1.49667176927496	0.1	0.16	1	ESMs	Scissor_pos_VS_Scissor_neg
KWMTBOMO15805	0.392764564161722	1.49651	0.014	0	1	ESMs	Scissor_pos_VS_Scissor_neg
KWMTBOMO12532	0.920442525746097	1.49549406243705	0.022	0.02	1	ESMs	Scissor_pos_VS_Scissor_neg
KWMTBOMO07339	0.578193120703313	1.49543870022231	0.247	0.26	1	ESMs	Scissor_pos_VS_Scissor_neg
KWMTBOMO15327	0.793894504081957	1.49497871975707	0.032	0.04	1	ESMs	Scissor_pos_VS_Scissor_neg
KWMTBOMO06592	0.611789721898198	1.49494986519715	0.027	0.04	1	ESMs	Scissor_pos_VS_Scissor_neg
KWMTBOMO05223	0.877059871992451	1.49493205232739	0.043	0.04	1	ESMs	Scissor_pos_VS_Scissor_neg
KWMTBOMO13185	0.0327554604128194	1.49484181397625	0.036	0.1	1	ESMs	Scissor_pos_VS_Scissor_neg
KWMTBOMO09172	1	1.4945015067794	0.02	0.02	1	ESMs	Scissor_pos_VS_Scissor_neg
KWMTBOMO02973	0.305395789028594	1.49406508204704	0.021	0	1	ESMs	Scissor_pos_VS_Scissor_neg
KWMTBOMO06856	0.197623650411079	1.4934238394948	0.053	0.1	1	ESMs	Scissor_pos_VS_Scissor_neg
KWMTBOMO04741	0.239619905755497	1.49324434151042	0.174	0.12	1	ESMs	Scissor_pos_VS_Scissor_neg
KWMTBOMO05152	0.150709774532051	1.49283575166944	0.074	0.14	1	ESMs	Scissor_pos_VS_Scissor_neg
KWMTBOMO02274	0.640911663924246	1.49260588673289	0.105	0.14	1	ESMs	Scissor_pos_VS_Scissor_neg
KWMTBOMO04485	0.634888919823481	1.49258710185798	0.293	0.34	1	ESMs	Scissor_pos_VS_Scissor_neg
KWMTBOMO16445	0.0718031926560223	1.49215345853953	0.216	0.12	1	ESMs	Scissor_pos_VS_Scissor_neg
KWMTBOMO04614	0.667673773952595	1.49176028614024	0.03	0.02	1	ESMs	Scissor_pos_VS_Scissor_neg
KWMTBOMO11320	0.486814478306729	1.49159	0.068	0.1	1	ESMs	Scissor_pos_VS_Scissor_neg
KWMTBOMO04704	0.331415741936528	1.49139974459715	0.019	0	1	ESMs	Scissor_pos_VS_Scissor_neg
KWMTBOMO04667	0.116324467531715	1.49113372872096	0.218	0.14	1	ESMs	Scissor_pos_VS_Scissor_neg
KWMTBOMO14464	0.998763841057957	1.48942687274745	0.158	0.18	1	ESMs	Scissor_pos_VS_Scissor_neg
KWMTBOMO01867	0.0372957365968463	1.4893910629336	0.145	0.04	1	ESMs	Scissor_pos_VS_Scissor_neg
KWMTBOMO08108	0.328942221184014	1.48933169756693	0.102	0.16	1	ESMs	Scissor_pos_VS_Scissor_neg
KWMTBOMO04573	0.894711270111449	1.48885870878329	0.042	0.04	1	ESMs	Scissor_pos_VS_Scissor_neg
KWMTBOMO00868	0.318069532256248	1.4878327514657	0.02	0	1	ESMs	Scissor_pos_VS_Scissor_neg
KWMTBOMO11803	0.429381362943892	1.48767662305534	0.012	0	1	ESMs	Scissor_pos_VS_Scissor_neg
KWMTBOMO12859	0.484558717592554	1.48553361264031	0.038	0.06	1	ESMs	Scissor_pos_VS_Scissor_neg
KWMTBOMO01062	0.860450387362043	1.48526804205729	0.034	0.04	1	ESMs	Scissor_pos_VS_Scissor_neg
KWMTBOMO00777	0.710132708729652	1.48353171493312	0.013	0.02	1	ESMs	Scissor_pos_VS_Scissor_neg
KWMTBOMO10929	0.0309658339085668	1.4835294575461	0.026	0.08	1	ESMs	Scissor_pos_VS_Scissor_neg
KWMTBOMO11104	0.41049068126903	1.48309418454988	0.013	0	1	ESMs	Scissor_pos_VS_Scissor_neg
KWMTBOMO15099	0.913965145967201	1.48288	0.018	0.02	1	ESMs	Scissor_pos_VS_Scissor_neg
KWMTBOMO04332	0.700992401521301	1.48160920122145	0.062	0.08	1	ESMs	Scissor_pos_VS_Scissor_neg
KWMTBOMO15878	0.814535702917129	1.48095674700075	0.025	0.02	1	ESMs	Scissor_pos_VS_Scissor_neg
KWMTBOMO05317	0.376085885697658	1.48085136054961	0.015	0	1	ESMs	Scissor_pos_VS_Scissor_neg
KWMTBOMO03015	0.913965145967201	1.4807512163944	0.018	0.02	1	ESMs	Scissor_pos_VS_Scissor_neg
KWMTBOMO09034	0.152838561248456	1.4797943707086	0.113	0.2	1	ESMs	Scissor_pos_VS_Scissor_neg
KWMTBOMO06815	0.496619440438875	1.47927124324947	0.024	0.04	1	ESMs	Scissor_pos_VS_Scissor_neg
KWMTBOMO04634	0.687854782430657	1.47924466738809	0.193	0.26	1	ESMs	Scissor_pos_VS_Scissor_neg
KWMTBOMO09192	0.206466698558112	1.47920801811897	0.066	0.12	1	ESMs	Scissor_pos_VS_Scissor_neg
KWMTBOMO08581	0.188053738968422	1.47919120551095	0.052	0.1	1	ESMs	Scissor_pos_VS_Scissor_neg
KWMTBOMO13637	0.460061967803233	1.47862768855765	0.082	0.12	1	ESMs	Scissor_pos_VS_Scissor_neg
KWMTBOMO06004	0.471250785953517	1.47843669104329	0.01	0	1	ESMs	Scissor_pos_VS_Scissor_neg
KWMTBOMO00057	0.749081727913388	1.47821859494481	0.048	0.06	1	ESMs	Scissor_pos_VS_Scissor_neg
KWMTBOMO13497	0.429381362943892	1.47820922827609	0.012	0	1	ESMs	Scissor_pos_VS_Scissor_neg
KWMTBOMO08025	0.571259732555108	1.4775410360704	0.026	0.04	1	ESMs	Scissor_pos_VS_Scissor_neg
KWMTBOMO04348	0.923942967770794	1.47754004483061	0.097	0.1	1	ESMs	Scissor_pos_VS_Scissor_neg
KWMTBOMO02526	0.401765549034433	1.47704399001338	0.05	0.08	1	ESMs	Scissor_pos_VS_Scissor_neg
KWMTBOMO13537	0.284420289354141	1.47694950504836	0.151	0.24	1	ESMs	Scissor_pos_VS_Scissor_neg
KWMTBOMO00168	0.0638947754299882	1.47629197661458	0.03	0.08	1	ESMs	Scissor_pos_VS_Scissor_neg
KWMTBOMO01868	0.0947297127086597	1.4757488886381	0.162	0.08	1	ESMs	Scissor_pos_VS_Scissor_neg
KWMTBOMO04663	0.69117879265903	1.4751939731705	0.139	0.18	1	ESMs	Scissor_pos_VS_Scissor_neg
KWMTBOMO07138	0.449577394001291	1.47444435796723	0.011	0	1	ESMs	Scissor_pos_VS_Scissor_neg
KWMTBOMO03948	0.429381362943892	1.47429662632676	0.012	0	1	ESMs	Scissor_pos_VS_Scissor_neg
KWMTBOMO02542	2.68413921674146e-11	1.47369366822328	0.958	0.82	4.53082699785959e-07	ESMs	Scissor_pos_VS_Scissor_neg
KWMTBOMO02733	0.15860027126139	1.47274342131193	0.1	0.18	1	ESMs	Scissor_pos_VS_Scissor_neg
KWMTBOMO01988	0.000942986316100828	1.4725097042778	0.552	0.4	1	ESMs	Scissor_pos_VS_Scissor_neg
KWMTBOMO09612	0.360355836100777	1.47233749950838	0.017	0	1	ESMs	Scissor_pos_VS_Scissor_neg
KWMTBOMO05070	0.592214959482808	1.47217560679808	0.011	0.02	1	ESMs	Scissor_pos_VS_Scissor_neg
KWMTBOMO09978	0.0727090871323903	1.47149124404943	0.065	0.14	1	ESMs	Scissor_pos_VS_Scissor_neg
KWMTBOMO11795	0.883452531050369	1.47143290221317	0.023	0.02	1	ESMs	Scissor_pos_VS_Scissor_neg
KWMTBOMO09469	0.302026379839725	1.47104215110356	0.072	0.12	1	ESMs	Scissor_pos_VS_Scissor_neg
KWMTBOMO13646	0.392764564161722	1.47035510245232	0.014	0	1	ESMs	Scissor_pos_VS_Scissor_neg
KWMTBOMO04530	0.593026228277452	1.46885931099712	0.174	0.24	1	ESMs	Scissor_pos_VS_Scissor_neg
KWMTBOMO01018	0.0346471994112294	1.46811658634948	0.081	0.18	1	ESMs	Scissor_pos_VS_Scissor_neg
KWMTBOMO14884	0.634126036057842	1.46635208166397	0.204	0.28	1	ESMs	Scissor_pos_VS_Scissor_neg
KWMTBOMO10329	0.392764564161722	1.46620725187236	0.014	0	1	ESMs	Scissor_pos_VS_Scissor_neg
KWMTBOMO14930	0.855120015147436	1.46584508357901	0.225	0.26	1	ESMs	Scissor_pos_VS_Scissor_neg
KWMTBOMO14039	0.202002387750895	1.46463979160411	0.053	0.1	1	ESMs	Scissor_pos_VS_Scissor_neg
KWMTBOMO11879	0.392764564161722	1.4646337890802	0.014	0	1	ESMs	Scissor_pos_VS_Scissor_neg
KWMTBOMO14895	0.293407151557993	1.46441767413218	0.044	0.08	1	ESMs	Scissor_pos_VS_Scissor_neg
KWMTBOMO06378	0.202444120966715	1.46299709394047	0.053	0.1	1	ESMs	Scissor_pos_VS_Scissor_neg
KWMTBOMO09669	0.380831289215931	1.4617812340606	0.021	0.04	1	ESMs	Scissor_pos_VS_Scissor_neg
KWMTBOMO03550	0.357528244063558	1.46032625224343	0.048	0.08	1	ESMs	Scissor_pos_VS_Scissor_neg
KWMTBOMO13814	0.0744917733429474	1.46000000935313	0.031	0.08	1	ESMs	Scissor_pos_VS_Scissor_neg
KWMTBOMO01753	0.524149267005352	1.45915840970343	0.055	0.08	1	ESMs	Scissor_pos_VS_Scissor_neg
KWMTBOMO00620	0.174584888602056	1.45848174735889	0.038	0.08	1	ESMs	Scissor_pos_VS_Scissor_neg
KWMTBOMO09670	0.240525994926395	1.45845778359324	0.068	0.12	1	ESMs	Scissor_pos_VS_Scissor_neg
KWMTBOMO13100	0.533462411869084	1.45822686641457	0.086	0.12	1	ESMs	Scissor_pos_VS_Scissor_neg
KWMTBOMO10291	0.537693213313949	1.45792636360595	0.101	0.14	1	ESMs	Scissor_pos_VS_Scissor_neg
KWMTBOMO09600	0.573671241811626	1.45779754661659	0.026	0.04	1	ESMs	Scissor_pos_VS_Scissor_neg
KWMTBOMO05036	0.0745601429383513	1.4576115885819	0.077	0.16	1	ESMs	Scissor_pos_VS_Scissor_neg
KWMTBOMO06531	0.120611030010977	1.45733300503514	0.296	0.24	1	ESMs	Scissor_pos_VS_Scissor_neg
KWMTBOMO06548	0.205649921409511	1.45591547118015	0.092	0.16	1	ESMs	Scissor_pos_VS_Scissor_neg
KWMTBOMO14741	0.14436419234317	1.45361189433001	0.049	0.1	1	ESMs	Scissor_pos_VS_Scissor_neg
KWMTBOMO07273	0.429381362943892	1.45354323797747	0.012	0	1	ESMs	Scissor_pos_VS_Scissor_neg
KWMTBOMO16208	0.818687133842242	1.45350716952753	0.067	0.08	1	ESMs	Scissor_pos_VS_Scissor_neg
KWMTBOMO13914	0.0634266988846684	1.45209387803915	0.197	0.1	1	ESMs	Scissor_pos_VS_Scissor_neg
KWMTBOMO02435	0.696522678271903	1.45181450750932	0.045	0.06	1	ESMs	Scissor_pos_VS_Scissor_neg
KWMTBOMO15146	0.0657539652476252	1.45152896106558	0.064	0.14	1	ESMs	Scissor_pos_VS_Scissor_neg
KWMTBOMO05895	0.955266941328432	1.45147816554758	0.113	0.12	1	ESMs	Scissor_pos_VS_Scissor_neg
KWMTBOMO06773	0.471250785953517	1.45127336590239	0.01	0	1	ESMs	Scissor_pos_VS_Scissor_neg
KWMTBOMO02636	0.0267989058527764	1.45100838140251	0.37	0.28	1	ESMs	Scissor_pos_VS_Scissor_neg
KWMTBOMO02583	0.12375743262451	1.45058845196153	0.211	0.14	1	ESMs	Scissor_pos_VS_Scissor_neg
KWMTBOMO06994	0.434451875968118	1.44979320531754	0.042	0.02	1	ESMs	Scissor_pos_VS_Scissor_neg
KWMTBOMO07462	0.751754975448034	1.44978610913038	0.027	0.02	1	ESMs	Scissor_pos_VS_Scissor_neg
KWMTBOMO09484	0.249948943981374	1.44929	0.056	0.1	1	ESMs	Scissor_pos_VS_Scissor_neg
KWMTBOMO01435	0.0227986493650185	1.44904337630276	0.055	0.14	1	ESMs	Scissor_pos_VS_Scissor_neg
KWMTBOMO06590	0.875482289642097	1.44902506733453	0.15	0.16	1	ESMs	Scissor_pos_VS_Scissor_neg
KWMTBOMO06493	0.726373192539786	1.44872315680693	0.028	0.02	1	ESMs	Scissor_pos_VS_Scissor_neg
KWMTBOMO02841	0.41049068126903	1.4483781363158	0.013	0	1	ESMs	Scissor_pos_VS_Scissor_neg
KWMTBOMO13578	0.215271003965396	1.44826627330301	0.028	0.06	1	ESMs	Scissor_pos_VS_Scissor_neg
KWMTBOMO03011	0.23481499075257	1.44807125240666	0.107	0.18	1	ESMs	Scissor_pos_VS_Scissor_neg
KWMTBOMO07757	0.22995301411293	1.44750021942496	0.041	0.08	1	ESMs	Scissor_pos_VS_Scissor_neg
KWMTBOMO03316	0.815538326126484	1.44719138220689	0.1	0.12	1	ESMs	Scissor_pos_VS_Scissor_neg
KWMTBOMO00567	0.432766151427648	1.44694754175078	0.149	0.12	1	ESMs	Scissor_pos_VS_Scissor_neg
KWMTBOMO11739	0.380831289215931	1.44644029923427	0.021	0.04	1	ESMs	Scissor_pos_VS_Scissor_neg
KWMTBOMO09561	0.119617649764404	1.44560631321834	0.096	0.18	1	ESMs	Scissor_pos_VS_Scissor_neg
KWMTBOMO16592	0.392764564161722	1.44522864467795	0.014	0	1	ESMs	Scissor_pos_VS_Scissor_neg
KWMTBOMO04612	0.62455776297066	1.44450624457245	0.105	0.14	1	ESMs	Scissor_pos_VS_Scissor_neg
KWMTBOMO11775	0.248897096218962	1.4435928746689	0.042	0.08	1	ESMs	Scissor_pos_VS_Scissor_neg
KWMTBOMO06228	0.845709348776893	1.44306135565379	0.044	0.04	1	ESMs	Scissor_pos_VS_Scissor_neg
KWMTBOMO15209	0.648282269447445	1.44217304379616	0.028	0.04	1	ESMs	Scissor_pos_VS_Scissor_neg
KWMTBOMO10437	0.516553915936739	1.44140758764419	0.176	0.16	1	ESMs	Scissor_pos_VS_Scissor_neg
KWMTBOMO06935	0.913965145967201	1.44094562023293	0.018	0.02	1	ESMs	Scissor_pos_VS_Scissor_neg
KWMTBOMO04737	0.345490050725336	1.43957910432032	0.018	0	1	ESMs	Scissor_pos_VS_Scissor_neg
KWMTBOMO07088	0.632902655379339	1.43940395866906	0.166	0.16	1	ESMs	Scissor_pos_VS_Scissor_neg
KWMTBOMO14051	0.526203592411333	1.4385855261137	0.128	0.18	1	ESMs	Scissor_pos_VS_Scissor_neg
KWMTBOMO15604	0.289066049733352	1.43841738950843	0.044	0.08	1	ESMs	Scissor_pos_VS_Scissor_neg
KWMTBOMO02108	3.03461594176952e-05	1.43786235537204	0.673	0.56	0.512243170970694	ESMs	Scissor_pos_VS_Scissor_neg
KWMTBOMO03646	0.0186630647924682	1.43782040024963	0.24	0.1	1	ESMs	Scissor_pos_VS_Scissor_neg
KWMTBOMO08729	0.170966947255907	1.43771587897312	0.051	0.1	1	ESMs	Scissor_pos_VS_Scissor_neg
KWMTBOMO01226	0.150829648663205	1.4375551259159	0.087	0.16	1	ESMs	Scissor_pos_VS_Scissor_neg
KWMTBOMO00102	0.0742344416792105	1.4364988164063	0.031	0.08	1	ESMs	Scissor_pos_VS_Scissor_neg
KWMTBOMO03110	0.817122458862535	1.43618087150205	0.015	0.02	1	ESMs	Scissor_pos_VS_Scissor_neg
KWMTBOMO11000	0.913965145967201	1.43344527290272	0.018	0.02	1	ESMs	Scissor_pos_VS_Scissor_neg
KWMTBOMO12652	0.748094072355428	1.43296540304789	0.17	0.22	1	ESMs	Scissor_pos_VS_Scissor_neg
KWMTBOMO11414	0.26900174229261	1.43267885800606	0.043	0.08	1	ESMs	Scissor_pos_VS_Scissor_neg
KWMTBOMO13399	0.893918980786611	1.43231246921717	0.035	0.04	1	ESMs	Scissor_pos_VS_Scissor_neg
KWMTBOMO04555	0.106757524408593	1.43086528774026	0.271	0.2	1	ESMs	Scissor_pos_VS_Scissor_neg
KWMTBOMO11554	0.862906487206083	1.43084434293519	0.034	0.04	1	ESMs	Scissor_pos_VS_Scissor_neg
KWMTBOMO05411	0.171919288082998	1.43028565546066	0.115	0.2	1	ESMs	Scissor_pos_VS_Scissor_neg
KWMTBOMO09912	0.265041398936023	1.42939343476762	0.03	0.06	1	ESMs	Scissor_pos_VS_Scissor_neg
KWMTBOMO16047	0.160627064698357	1.42937640304734	0.332	0.3	1	ESMs	Scissor_pos_VS_Scissor_neg
KWMTBOMO15278	0.248927079305409	1.42916766362183	0.069	0.12	1	ESMs	Scissor_pos_VS_Scissor_neg
KWMTBOMO01053	0.128477545472652	1.42911593257524	0.085	0.16	1	ESMs	Scissor_pos_VS_Scissor_neg
KWMTBOMO15096	0.331415741936528	1.42892005630469	0.019	0	1	ESMs	Scissor_pos_VS_Scissor_neg
KWMTBOMO07225	0.318104022703821	1.42852847444566	0.032	0.06	1	ESMs	Scissor_pos_VS_Scissor_neg
KWMTBOMO11116	0.392764564161722	1.42736575441776	0.014	0	1	ESMs	Scissor_pos_VS_Scissor_neg
KWMTBOMO12905	0.355022069641789	1.42633868033575	0.243	0.22	1	ESMs	Scissor_pos_VS_Scissor_neg
KWMTBOMO16171	0.883452531050369	1.42632919530308	0.023	0.02	1	ESMs	Scissor_pos_VS_Scissor_neg
KWMTBOMO14399	0.817122458862535	1.42608672648719	0.015	0.02	1	ESMs	Scissor_pos_VS_Scissor_neg
KWMTBOMO03957	0.611789721898198	1.42564339579145	0.027	0.04	1	ESMs	Scissor_pos_VS_Scissor_neg
KWMTBOMO03913	0.228868042473878	1.4252	0.041	0.08	1	ESMs	Scissor_pos_VS_Scissor_neg
KWMTBOMO05997	0.913965145967201	1.42493103255586	0.018	0.02	1	ESMs	Scissor_pos_VS_Scissor_neg
KWMTBOMO03684	0.0309658339085668	1.42438525208391	0.026	0.08	1	ESMs	Scissor_pos_VS_Scissor_neg
KWMTBOMO05391	0.404416885878374	1.42433587193638	0.064	0.1	1	ESMs	Scissor_pos_VS_Scissor_neg
KWMTBOMO07090	0.392764564161722	1.42385802752468	0.014	0	1	ESMs	Scissor_pos_VS_Scissor_neg
KWMTBOMO00505	0.958885365043898	1.42312841098987	0.019	0.02	1	ESMs	Scissor_pos_VS_Scissor_neg
KWMTBOMO04200	0.0533540630181509	1.42309265814409	0.051	0.12	1	ESMs	Scissor_pos_VS_Scissor_neg
KWMTBOMO06330	0.774190137338596	1.42294365343953	0.202	0.26	1	ESMs	Scissor_pos_VS_Scissor_neg
KWMTBOMO07727	0.290472763499877	1.42189528569045	0.031	0.06	1	ESMs	Scissor_pos_VS_Scissor_neg
KWMTBOMO02893	0.279009423703354	1.42094320403391	0.098	0.16	1	ESMs	Scissor_pos_VS_Scissor_neg
KWMTBOMO14285	0.602512177956463	1.42075299643916	0.042	0.06	1	ESMs	Scissor_pos_VS_Scissor_neg
KWMTBOMO10124	0.250450714571311	1.4207329070432	0.056	0.1	1	ESMs	Scissor_pos_VS_Scissor_neg
KWMTBOMO16454	0.210088914254088	1.41981808756137	0.257	0.22	1	ESMs	Scissor_pos_VS_Scissor_neg
KWMTBOMO10132	0.785109487761651	1.41768133372105	0.049	0.06	1	ESMs	Scissor_pos_VS_Scissor_neg
KWMTBOMO14175	0.475053514270607	1.41658513695136	0.126	0.18	1	ESMs	Scissor_pos_VS_Scissor_neg
KWMTBOMO00655	0.612303188435241	1.41647074994499	0.149	0.2	1	ESMs	Scissor_pos_VS_Scissor_neg
KWMTBOMO04679	0.0160368885384958	1.4155026665318	0.084	0.2	1	ESMs	Scissor_pos_VS_Scissor_neg
KWMTBOMO08134	0.40166282783892	1.41500373201213	0.277	0.28	1	ESMs	Scissor_pos_VS_Scissor_neg
KWMTBOMO00180	0.0577399435377427	1.41430964876381	0.063	0.14	1	ESMs	Scissor_pos_VS_Scissor_neg
KWMTBOMO11075	0.0925768172619211	1.4141552611458	0.092	0.18	1	ESMs	Scissor_pos_VS_Scissor_neg
KWMTBOMO10526	0.642994474815567	1.41405440103878	0.06	0.08	1	ESMs	Scissor_pos_VS_Scissor_neg
KWMTBOMO08301	0.255267016853665	1.41348018976798	0.085	0.04	1	ESMs	Scissor_pos_VS_Scissor_neg
KWMTBOMO15203	0.848182494138318	1.41337307538909	0.024	0.02	1	ESMs	Scissor_pos_VS_Scissor_neg
KWMTBOMO05660	0.0597206280592271	1.41307205736694	0.063	0.14	1	ESMs	Scissor_pos_VS_Scissor_neg
KWMTBOMO08343	0.0302316558035049	1.41284855421149	0.057	0.14	1	ESMs	Scissor_pos_VS_Scissor_neg
KWMTBOMO08991	0.313411354775737	1.41267528834858	0.154	0.24	1	ESMs	Scissor_pos_VS_Scissor_neg
KWMTBOMO09463	0.710132708729652	1.41252702987062	0.013	0.02	1	ESMs	Scissor_pos_VS_Scissor_neg
KWMTBOMO06612	0.449577394001291	1.41147266272422	0.011	0	1	ESMs	Scissor_pos_VS_Scissor_neg
KWMTBOMO11480	0.457910894162888	1.41145330076428	0.023	0.04	1	ESMs	Scissor_pos_VS_Scissor_neg
KWMTBOMO00621	0.47833786957467	1.41104966605939	0.154	0.22	1	ESMs	Scissor_pos_VS_Scissor_neg
KWMTBOMO06458	0.92944105195512	1.41042460336734	0.198	0.24	1	ESMs	Scissor_pos_VS_Scissor_neg
KWMTBOMO08706	0.672731618178625	1.40988027870523	0.179	0.18	1	ESMs	Scissor_pos_VS_Scissor_neg
KWMTBOMO06867	0.188965756083704	1.40805369596421	0.336	0.32	1	ESMs	Scissor_pos_VS_Scissor_neg
KWMTBOMO15533	0.870020095635745	1.4075179215335	0.228	0.26	1	ESMs	Scissor_pos_VS_Scissor_neg
KWMTBOMO16521	0.0233089433826863	1.4074157828583	0.055	0.14	1	ESMs	Scissor_pos_VS_Scissor_neg
KWMTBOMO05898	0.453279526001634	1.40721348547729	0.052	0.08	1	ESMs	Scissor_pos_VS_Scissor_neg
KWMTBOMO13951	0.529079907986431	1.40554121483354	0.01	0.02	1	ESMs	Scissor_pos_VS_Scissor_neg
KWMTBOMO00943	0.0863951022711178	1.40495993045557	0.067	0.14	1	ESMs	Scissor_pos_VS_Scissor_neg
KWMTBOMO02355	0.380831289215931	1.40388975229267	0.021	0.04	1	ESMs	Scissor_pos_VS_Scissor_neg
KWMTBOMO01940	0.524347960298077	1.40358121339384	0.083	0.06	1	ESMs	Scissor_pos_VS_Scissor_neg
KWMTBOMO06208	0.930985135138464	1.40233799694533	0.041	0.04	1	ESMs	Scissor_pos_VS_Scissor_neg
KWMTBOMO01997	0.140969185579767	1.40228428664927	0.036	0.08	1	ESMs	Scissor_pos_VS_Scissor_neg
KWMTBOMO14149	0.817122458862535	1.40218015278405	0.015	0.02	1	ESMs	Scissor_pos_VS_Scissor_neg
KWMTBOMO03855	0.683055946744221	1.4016003932642	0.029	0.04	1	ESMs	Scissor_pos_VS_Scissor_neg
KWMTBOMO00902	0.367429669420332	1.40155047282468	0.208	0.18	1	ESMs	Scissor_pos_VS_Scissor_neg
KWMTBOMO00080	0.705862084369499	1.40152140998492	0.14	0.18	1	ESMs	Scissor_pos_VS_Scissor_neg
KWMTBOMO10095	0.19185232963858	1.40146160391744	0.027	0.06	1	ESMs	Scissor_pos_VS_Scissor_neg
KWMTBOMO04522	0.155216597465257	1.40075666192212	0.226	0.16	1	ESMs	Scissor_pos_VS_Scissor_neg
KWMTBOMO13409	0.0472994510062956	1.40036389475716	0.24	0.14	1	ESMs	Scissor_pos_VS_Scissor_neg
KWMTBOMO07596	0.345490050725336	1.3997741251676	0.018	0	1	ESMs	Scissor_pos_VS_Scissor_neg
KWMTBOMO02927	0.664251645671854	1.39933008517442	0.108	0.14	1	ESMs	Scissor_pos_VS_Scissor_neg
KWMTBOMO03544	0.152470185271112	1.39782809954932	0.074	0.02	1	ESMs	Scissor_pos_VS_Scissor_neg
KWMTBOMO04078	1	1.39778506662632	0.02	0.02	1	ESMs	Scissor_pos_VS_Scissor_neg
KWMTBOMO00045	0.866752528287985	1.3975665157531	0.017	0.02	1	ESMs	Scissor_pos_VS_Scissor_neg
KWMTBOMO10797	0.817122458862535	1.39638193705759	0.015	0.02	1	ESMs	Scissor_pos_VS_Scissor_neg
KWMTBOMO07381	0.848182494138318	1.39591671692948	0.024	0.02	1	ESMs	Scissor_pos_VS_Scissor_neg
KWMTBOMO07175	0.962408784788764	1.39548838915161	0.059	0.06	1	ESMs	Scissor_pos_VS_Scissor_neg
KWMTBOMO01487	0.15465842321316	1.39498154628069	0.062	0.12	1	ESMs	Scissor_pos_VS_Scissor_neg
KWMTBOMO01886	0.535246548374576	1.3949639711954	0.025	0.04	1	ESMs	Scissor_pos_VS_Scissor_neg
KWMTBOMO14993	0.373737820354807	1.39446205962135	0.034	0.06	1	ESMs	Scissor_pos_VS_Scissor_neg
KWMTBOMO15188	0.605696761179448	1.39409899645724	0.027	0.04	1	ESMs	Scissor_pos_VS_Scissor_neg
KWMTBOMO02150	0.0944879234384402	1.39287889208343	0.128	0.24	1	ESMs	Scissor_pos_VS_Scissor_neg
KWMTBOMO08066	0.115437945891829	1.39219737548858	0.083	0.16	1	ESMs	Scissor_pos_VS_Scissor_neg
KWMTBOMO01145	0.795134504247975	1.39209554398593	0.032	0.04	1	ESMs	Scissor_pos_VS_Scissor_neg
KWMTBOMO10755	0.958885365043898	1.39205403993476	0.019	0.02	1	ESMs	Scissor_pos_VS_Scissor_neg
KWMTBOMO16868	0.92787305470985	1.3915906579723	0.036	0.04	1	ESMs	Scissor_pos_VS_Scissor_neg
KWMTBOMO12282	0.711783889959953	1.39071833647608	0.301	0.36	1	ESMs	Scissor_pos_VS_Scissor_neg
KWMTBOMO00858	0.452696605079878	1.39031396833181	0.088	0.06	1	ESMs	Scissor_pos_VS_Scissor_neg
KWMTBOMO06680	0.360355836100777	1.39019783846113	0.017	0	1	ESMs	Scissor_pos_VS_Scissor_neg
KWMTBOMO02943	0.0755006769888488	1.3895119225135	0.054	0.12	1	ESMs	Scissor_pos_VS_Scissor_neg
KWMTBOMO02502	0.345643057679091	1.38881832973669	0.033	0.06	1	ESMs	Scissor_pos_VS_Scissor_neg
KWMTBOMO11751	0.0787933739047114	1.38855758924632	0.066	0.14	1	ESMs	Scissor_pos_VS_Scissor_neg
KWMTBOMO07742	0.423654310736172	1.38855189875804	0.065	0.1	1	ESMs	Scissor_pos_VS_Scissor_neg
KWMTBOMO10349	0.110394330446248	1.38670315739336	0.058	0.12	1	ESMs	Scissor_pos_VS_Scissor_neg
KWMTBOMO15994	0.305395789028594	1.38561241512072	0.019	0.04	1	ESMs	Scissor_pos_VS_Scissor_neg
KWMTBOMO09733	0.764953097168224	1.38535147542043	0.014	0.02	1	ESMs	Scissor_pos_VS_Scissor_neg
KWMTBOMO06831	0.00962064361662281	1.38487887879335	0.069	0.18	1	ESMs	Scissor_pos_VS_Scissor_neg
KWMTBOMO12948	0.533597308616573	1.38179259503436	0.17	0.24	1	ESMs	Scissor_pos_VS_Scissor_neg
KWMTBOMO10488	0.353162256334472	1.38153433015349	0.146	0.22	1	ESMs	Scissor_pos_VS_Scissor_neg
KWMTBOMO14077	0.00959235400207924	1.38136356212532	0.268	0.1	1	ESMs	Scissor_pos_VS_Scissor_neg
KWMTBOMO15234	0.315041109300767	1.38078157952526	0.032	0.06	1	ESMs	Scissor_pos_VS_Scissor_neg
KWMTBOMO04518	0.142794062324566	1.38054018225981	0.061	0.12	1	ESMs	Scissor_pos_VS_Scissor_neg
KWMTBOMO12683	0.607459367525962	1.37996028629616	0.09	0.12	1	ESMs	Scissor_pos_VS_Scissor_neg
KWMTBOMO14809	0.203329698213913	1.37968673379285	0.053	0.1	1	ESMs	Scissor_pos_VS_Scissor_neg
KWMTBOMO14658	0.227659405507301	1.37681842628081	0.222	0.18	1	ESMs	Scissor_pos_VS_Scissor_neg
KWMTBOMO01073	0.793894504081957	1.37580513494601	0.032	0.04	1	ESMs	Scissor_pos_VS_Scissor_neg
KWMTBOMO07285	0.611789721898198	1.37471485346772	0.027	0.04	1	ESMs	Scissor_pos_VS_Scissor_neg
KWMTBOMO00393	0.0810781623966065	1.37423293851819	0.079	0.16	1	ESMs	Scissor_pos_VS_Scissor_neg
KWMTBOMO14346	0.365983333424761	1.37380591087738	0.132	0.2	1	ESMs	Scissor_pos_VS_Scissor_neg
KWMTBOMO11192	0.138523303483766	1.37379405143844	0.073	0.14	1	ESMs	Scissor_pos_VS_Scissor_neg
KWMTBOMO05990	0.315805014695748	1.37364659732672	0.032	0.06	1	ESMs	Scissor_pos_VS_Scissor_neg
KWMTBOMO03777	0.0545384548969408	1.3725354606692	0.097	0.2	1	ESMs	Scissor_pos_VS_Scissor_neg
KWMTBOMO03476	0.129010145686077	1.37224299185482	0.097	0.18	1	ESMs	Scissor_pos_VS_Scissor_neg
KWMTBOMO01690	0.268836507857507	1.37113551786418	0.018	0.04	1	ESMs	Scissor_pos_VS_Scissor_neg
KWMTBOMO07265	0.271383504639522	1.37034896350216	0.043	0.08	1	ESMs	Scissor_pos_VS_Scissor_neg
KWMTBOMO05547	0.41049068126903	1.3702834593239	0.013	0	1	ESMs	Scissor_pos_VS_Scissor_neg
KWMTBOMO11852	0.0510119266607871	1.3700423554923	0.108	0.02	1	ESMs	Scissor_pos_VS_Scissor_neg
KWMTBOMO11405	0.431266123580429	1.36843589211704	0.036	0.06	1	ESMs	Scissor_pos_VS_Scissor_neg
KWMTBOMO03064	0.684292330743844	1.36790209824461	0.029	0.04	1	ESMs	Scissor_pos_VS_Scissor_neg
KWMTBOMO13527	0.814535702917129	1.36783892191938	0.025	0.02	1	ESMs	Scissor_pos_VS_Scissor_neg
KWMTBOMO06035	0.34280625333511	1.36769062261299	0.02	0.04	1	ESMs	Scissor_pos_VS_Scissor_neg
KWMTBOMO00098	0.133571767005551	1.36766976569893	0.06	0.12	1	ESMs	Scissor_pos_VS_Scissor_neg
KWMTBOMO13715	0.41049068126903	1.36763734667199	0.013	0	1	ESMs	Scissor_pos_VS_Scissor_neg
KWMTBOMO06464	0.103821845897697	1.3676032383855	0.376	0.36	1	ESMs	Scissor_pos_VS_Scissor_neg
KWMTBOMO07988	0.215271003965396	1.36747300177486	0.028	0.06	1	ESMs	Scissor_pos_VS_Scissor_neg
KWMTBOMO02134	0.817122458862535	1.36728360787911	0.015	0.02	1	ESMs	Scissor_pos_VS_Scissor_neg
KWMTBOMO01699	0.883452531050369	1.36553134091922	0.023	0.02	1	ESMs	Scissor_pos_VS_Scissor_neg
KWMTBOMO10281	0.264342396963585	1.36520987887409	0.03	0.06	1	ESMs	Scissor_pos_VS_Scissor_neg
KWMTBOMO05835	0.34280625333511	1.36494613926057	0.02	0.04	1	ESMs	Scissor_pos_VS_Scissor_neg
KWMTBOMO10815	0.291207068629179	1.36474000215529	0.031	0.06	1	ESMs	Scissor_pos_VS_Scissor_neg
KWMTBOMO05125	0.0425342418274566	1.36432725705391	0.06	0.14	1	ESMs	Scissor_pos_VS_Scissor_neg
KWMTBOMO08954	0.866752528287985	1.36206806093281	0.017	0.02	1	ESMs	Scissor_pos_VS_Scissor_neg
KWMTBOMO01033	0.360355836100777	1.36118329670464	0.017	0	1	ESMs	Scissor_pos_VS_Scissor_neg
KWMTBOMO07794	0.110066288453371	1.36065170625376	0.023	0.06	1	ESMs	Scissor_pos_VS_Scissor_neg
KWMTBOMO02163	0.155660827876136	1.36062980866968	0.139	0.24	1	ESMs	Scissor_pos_VS_Scissor_neg
KWMTBOMO13290	0.111702630758077	1.36027011627319	0.034	0.08	1	ESMs	Scissor_pos_VS_Scissor_neg
KWMTBOMO09754	0.130934827889399	1.35997578165162	0.048	0.1	1	ESMs	Scissor_pos_VS_Scissor_neg
KWMTBOMO09743	0.75838369640331	1.35855210126126	0.031	0.04	1	ESMs	Scissor_pos_VS_Scissor_neg
KWMTBOMO01179	0.7571407978895	1.3580712825135	0.027	0.02	1	ESMs	Scissor_pos_VS_Scissor_neg
KWMTBOMO11584	0.269595833238048	1.35797450185411	0.043	0.08	1	ESMs	Scissor_pos_VS_Scissor_neg
KWMTBOMO02700	0.140969185579767	1.35790975185873	0.036	0.08	1	ESMs	Scissor_pos_VS_Scissor_neg
KWMTBOMO09778	0.00710104279757081	1.3575154294902	0.47	0.36	1	ESMs	Scissor_pos_VS_Scissor_neg
KWMTBOMO08946	0.709110635518915	1.35742327352989	0.168	0.22	1	ESMs	Scissor_pos_VS_Scissor_neg
KWMTBOMO15171	0.440614272271814	1.35614368912169	0.137	0.2	1	ESMs	Scissor_pos_VS_Scissor_neg
KWMTBOMO08603	0.239698434547206	1.35565180896624	0.029	0.06	1	ESMs	Scissor_pos_VS_Scissor_neg
KWMTBOMO15609	0.380831289215931	1.35557830085694	0.021	0.04	1	ESMs	Scissor_pos_VS_Scissor_neg
KWMTBOMO02153	0.958885365043898	1.35555852739421	0.019	0.02	1	ESMs	Scissor_pos_VS_Scissor_neg
KWMTBOMO10088	0.75109903546286	1.35542673957902	0.048	0.06	1	ESMs	Scissor_pos_VS_Scissor_neg
KWMTBOMO14936	0.15719074217438	1.35439031321873	0.05	0.1	1	ESMs	Scissor_pos_VS_Scissor_neg
KWMTBOMO11013	0.401451040554507	1.35419131443275	0.035	0.06	1	ESMs	Scissor_pos_VS_Scissor_neg
KWMTBOMO06664	0.156688878904307	1.35293319912048	0.037	0.08	1	ESMs	Scissor_pos_VS_Scissor_neg
KWMTBOMO14031	0.958885365043898	1.35275196409981	0.019	0.02	1	ESMs	Scissor_pos_VS_Scissor_neg
KWMTBOMO01485	0.0232354425104217	1.35265226968872	0.055	0.14	1	ESMs	Scissor_pos_VS_Scissor_neg
KWMTBOMO04517	0.264342396963585	1.35190008420297	0.03	0.06	1	ESMs	Scissor_pos_VS_Scissor_neg
KWMTBOMO03560	0.496619440438875	1.35155445142181	0.024	0.04	1	ESMs	Scissor_pos_VS_Scissor_neg
KWMTBOMO11814	0.471250785953517	1.35076833905399	0.01	0	1	ESMs	Scissor_pos_VS_Scissor_neg
KWMTBOMO03279	0.9040797225343	1.3507176678453	0.132	0.14	1	ESMs	Scissor_pos_VS_Scissor_neg
KWMTBOMO01292	0.0542583102819341	1.35064694473275	0.029	0.08	1	ESMs	Scissor_pos_VS_Scissor_neg
KWMTBOMO13904	0.634248433089164	1.34805527696314	0.043	0.06	1	ESMs	Scissor_pos_VS_Scissor_neg
KWMTBOMO02552	0.491418889477433	1.3479702548934	0.237	0.24	1	ESMs	Scissor_pos_VS_Scissor_neg
KWMTBOMO05253	0.419261053177602	1.34780435512312	0.022	0.04	1	ESMs	Scissor_pos_VS_Scissor_neg
KWMTBOMO11662	0.0939995700742111	1.34771138828046	0.081	0.16	1	ESMs	Scissor_pos_VS_Scissor_neg
KWMTBOMO04908	0.250321085598244	1.34693253712072	0.042	0.08	1	ESMs	Scissor_pos_VS_Scissor_neg
KWMTBOMO11111	0.0146992115749539	1.34489000459501	0.072	0.18	1	ESMs	Scissor_pos_VS_Scissor_neg
KWMTBOMO14898	0.0593261673460542	1.3442886586524	0.04	0.1	1	ESMs	Scissor_pos_VS_Scissor_neg
KWMTBOMO12722	0.167044913029535	1.34417	0.014	0.04	1	ESMs	Scissor_pos_VS_Scissor_neg
KWMTBOMO15588	0.683828517316707	1.34399943340224	0.255	0.36	1	ESMs	Scissor_pos_VS_Scissor_neg
KWMTBOMO15321	0.715004860161575	1.34328706958924	0.071	0.06	1	ESMs	Scissor_pos_VS_Scissor_neg
KWMTBOMO06176	0.966918219421935	1.34275572037596	0.056	0.06	1	ESMs	Scissor_pos_VS_Scissor_neg
KWMTBOMO07780	0.070234548046062	1.34144043735333	0.065	0.14	1	ESMs	Scissor_pos_VS_Scissor_neg
KWMTBOMO00780	0.168669179440788	1.34119302499491	0.098	0.04	1	ESMs	Scissor_pos_VS_Scissor_neg
KWMTBOMO13229	0.0173554135901611	1.34043183284027	0.053	0.14	1	ESMs	Scissor_pos_VS_Scissor_neg
KWMTBOMO13726	0.535246548374576	1.34035407584841	0.025	0.04	1	ESMs	Scissor_pos_VS_Scissor_neg
KWMTBOMO12393	0.0015215851285179	1.34012356898705	0.513	0.36	1	ESMs	Scissor_pos_VS_Scissor_neg
KWMTBOMO06625	0.159155830841107	1.33955185518774	0.113	0.2	1	ESMs	Scissor_pos_VS_Scissor_neg
KWMTBOMO08716	0.360355836100777	1.33915922995587	0.017	0	1	ESMs	Scissor_pos_VS_Scissor_neg
KWMTBOMO04189	0.0897192873785154	1.33843794374643	0.227	0.14	1	ESMs	Scissor_pos_VS_Scissor_neg
KWMTBOMO06366	0.376085885697658	1.33775973468962	0.015	0	1	ESMs	Scissor_pos_VS_Scissor_neg
KWMTBOMO11283	0.131304301379309	1.33582252545678	0.072	0.14	1	ESMs	Scissor_pos_VS_Scissor_neg
KWMTBOMO13722	0.331289060779116	1.33575392046797	0.046	0.08	1	ESMs	Scissor_pos_VS_Scissor_neg
KWMTBOMO09658	0.482708831640858	1.33575266982029	0.106	0.08	1	ESMs	Scissor_pos_VS_Scissor_neg
KWMTBOMO05276	0.0317404054492762	1.33505436039494	0.08	0.18	1	ESMs	Scissor_pos_VS_Scissor_neg
KWMTBOMO14176	0.920442525746097	1.33464120580778	0.022	0.02	1	ESMs	Scissor_pos_VS_Scissor_neg
KWMTBOMO13930	0.960851874596886	1.33391330781092	0.021	0.02	1	ESMs	Scissor_pos_VS_Scissor_neg
KWMTBOMO03422	0.449577394001291	1.33372681787045	0.011	0	1	ESMs	Scissor_pos_VS_Scissor_neg
KWMTBOMO02872	0.233392727498588	1.3333965035298	0.017	0.04	1	ESMs	Scissor_pos_VS_Scissor_neg
KWMTBOMO01788	0.619767412750337	1.33316342243866	0.257	0.28	1	ESMs	Scissor_pos_VS_Scissor_neg
KWMTBOMO05203	0.381455948167233	1.33271175979773	0.187	0.28	1	ESMs	Scissor_pos_VS_Scissor_neg
KWMTBOMO00211	0.0111755148339704	1.33270413753971	0.401	0.26	1	ESMs	Scissor_pos_VS_Scissor_neg
KWMTBOMO16181	0.445666674241189	1.33234200172968	0.052	0.08	1	ESMs	Scissor_pos_VS_Scissor_neg
KWMTBOMO02087	0.097049994518898	1.3317241590835	0.081	0.16	1	ESMs	Scissor_pos_VS_Scissor_neg
KWMTBOMO07714	0.173667206375478	1.33123951405796	0.038	0.08	1	ESMs	Scissor_pos_VS_Scissor_neg
KWMTBOMO03335	0.41049068126903	1.33111089413354	0.013	0	1	ESMs	Scissor_pos_VS_Scissor_neg
KWMTBOMO04364	0.142947628924516	1.33060222809378	0.049	0.1	1	ESMs	Scissor_pos_VS_Scissor_neg
KWMTBOMO07540	0.110066288453371	1.32992828330133	0.023	0.06	1	ESMs	Scissor_pos_VS_Scissor_neg
KWMTBOMO01164	0.710132708729652	1.32963687772538	0.013	0.02	1	ESMs	Scissor_pos_VS_Scissor_neg
KWMTBOMO10958	0.60180473456595	1.32845544999327	0.169	0.16	1	ESMs	Scissor_pos_VS_Scissor_neg
KWMTBOMO02194	0.484312305348156	1.32782586284048	0.039	0.02	1	ESMs	Scissor_pos_VS_Scissor_neg
KWMTBOMO01944	1	1.32771679630941	0.02	0.02	1	ESMs	Scissor_pos_VS_Scissor_neg
KWMTBOMO05716	0.0716399683790289	1.32758287561075	0.065	0.14	1	ESMs	Scissor_pos_VS_Scissor_neg
KWMTBOMO11072	0.0372744260460025	1.32632588215971	0.285	0.16	1	ESMs	Scissor_pos_VS_Scissor_neg
KWMTBOMO15324	0.140170047922832	1.32628427146794	0.036	0.08	1	ESMs	Scissor_pos_VS_Scissor_neg
KWMTBOMO15989	0.942622899327234	1.32584210308576	0.114	0.12	1	ESMs	Scissor_pos_VS_Scissor_neg
KWMTBOMO12667	0.0202386108368161	1.32584148189376	0.262	0.12	1	ESMs	Scissor_pos_VS_Scissor_neg
KWMTBOMO09013	0.358216955512442	1.32309361967967	0.048	0.08	1	ESMs	Scissor_pos_VS_Scissor_neg
KWMTBOMO06207	0.169264560517312	1.32277749557281	0.026	0.06	1	ESMs	Scissor_pos_VS_Scissor_neg
KWMTBOMO10840	0.072913182069135	1.32206171869438	0.054	0.12	1	ESMs	Scissor_pos_VS_Scissor_neg
KWMTBOMO01705	0.792044301013361	1.32184347560561	0.099	0.12	1	ESMs	Scissor_pos_VS_Scissor_neg
KWMTBOMO13029	0.127688906629896	1.32170053287011	0.133	0.24	1	ESMs	Scissor_pos_VS_Scissor_neg
KWMTBOMO11427	0.718527115031496	1.32137984427919	0.03	0.04	1	ESMs	Scissor_pos_VS_Scissor_neg
KWMTBOMO16296	0.408309032966282	1.32137	0.064	0.1	1	ESMs	Scissor_pos_VS_Scissor_neg
KWMTBOMO09539	0.893918980786611	1.32108009976095	0.035	0.04	1	ESMs	Scissor_pos_VS_Scissor_neg
KWMTBOMO14747	0.426009570400221	1.32089552670341	0.036	0.06	1	ESMs	Scissor_pos_VS_Scissor_neg
KWMTBOMO07710	0.449577394001291	1.31998378574684	0.011	0	1	ESMs	Scissor_pos_VS_Scissor_neg
KWMTBOMO10421	0.806767569041969	1.31984912226778	0.1	0.12	1	ESMs	Scissor_pos_VS_Scissor_neg
KWMTBOMO01457	0.344046922375944	1.31967258646931	0.033	0.06	1	ESMs	Scissor_pos_VS_Scissor_neg
KWMTBOMO15443	0.324300195022865	1.31928265234586	0.06	0.1	1	ESMs	Scissor_pos_VS_Scissor_neg
KWMTBOMO10230	0.925539027687014	1.31910637649388	0.184	0.22	1	ESMs	Scissor_pos_VS_Scissor_neg
KWMTBOMO10456	0.269595822724097	1.31773126277311	0.043	0.08	1	ESMs	Scissor_pos_VS_Scissor_neg
KWMTBOMO13922	0.160897575440704	1.31692826522837	0.127	0.22	1	ESMs	Scissor_pos_VS_Scissor_neg
KWMTBOMO06993	0.0129344322809625	1.31452906690024	0.051	0.14	1	ESMs	Scissor_pos_VS_Scissor_neg
KWMTBOMO10749	0.621696763007706	1.31299579236717	0.059	0.08	1	ESMs	Scissor_pos_VS_Scissor_neg
KWMTBOMO03336	0.429381362943892	1.31268786113169	0.012	0	1	ESMs	Scissor_pos_VS_Scissor_neg
KWMTBOMO15581	0.314765029297232	1.31204	0.045	0.08	1	ESMs	Scissor_pos_VS_Scissor_neg
KWMTBOMO14417	0.34280625333511	1.31195934796087	0.02	0.04	1	ESMs	Scissor_pos_VS_Scissor_neg
KWMTBOMO02568	0.764953097168224	1.31175550735149	0.014	0.02	1	ESMs	Scissor_pos_VS_Scissor_neg
KWMTBOMO15908	0.449577394001291	1.3107204096553	0.011	0	1	ESMs	Scissor_pos_VS_Scissor_neg
KWMTBOMO15715	0.255761355105028	1.31040106361192	0.336	0.34	1	ESMs	Scissor_pos_VS_Scissor_neg
KWMTBOMO13316	0.0447543475652025	1.30788492875544	0.038	0.1	1	ESMs	Scissor_pos_VS_Scissor_neg
KWMTBOMO14699	0.61823690272033	1.30649522057485	0.116	0.1	1	ESMs	Scissor_pos_VS_Scissor_neg
KWMTBOMO00525	0.110161507620433	1.30558468973154	0.261	0.18	1	ESMs	Scissor_pos_VS_Scissor_neg
KWMTBOMO02007	0.250606577577685	1.30520860008575	0.042	0.08	1	ESMs	Scissor_pos_VS_Scissor_neg
KWMTBOMO08000	0.144009052673733	1.30494359144941	0.049	0.1	1	ESMs	Scissor_pos_VS_Scissor_neg
KWMTBOMO01984	0.22171224680404	1.30453002646914	0.081	0.14	1	ESMs	Scissor_pos_VS_Scissor_neg
KWMTBOMO05060	0.0387591318463523	1.3044428582555	0.104	0.22	1	ESMs	Scissor_pos_VS_Scissor_neg
KWMTBOMO11802	0.0142931857604996	1.30350768603223	0.104	0.24	1	ESMs	Scissor_pos_VS_Scissor_neg
KWMTBOMO04447	0.687337733905501	1.30349788008314	0.221	0.24	1	ESMs	Scissor_pos_VS_Scissor_neg
KWMTBOMO12292	0.866752528287985	1.3021492177602	0.017	0.02	1	ESMs	Scissor_pos_VS_Scissor_neg
KWMTBOMO11027	0.429381362943892	1.30185786192077	0.012	0	1	ESMs	Scissor_pos_VS_Scissor_neg
KWMTBOMO00457	0.215271003965396	1.30121906504048	0.028	0.06	1	ESMs	Scissor_pos_VS_Scissor_neg
KWMTBOMO06627	0.652570671653177	1.30004371348446	0.012	0.02	1	ESMs	Scissor_pos_VS_Scissor_neg
KWMTBOMO02047	0.521348486017855	1.29984818615576	0.07	0.1	1	ESMs	Scissor_pos_VS_Scissor_neg
KWMTBOMO06204	0.75714214431889	1.29947143902397	0.031	0.04	1	ESMs	Scissor_pos_VS_Scissor_neg
KWMTBOMO13847	0.977752013744605	1.29850053757663	0.158	0.18	1	ESMs	Scissor_pos_VS_Scissor_neg
KWMTBOMO09629	0.144973624020206	1.29831471415512	0.112	0.2	1	ESMs	Scissor_pos_VS_Scissor_neg
KWMTBOMO08273	0.496619440438875	1.29777001250104	0.024	0.04	1	ESMs	Scissor_pos_VS_Scissor_neg
KWMTBOMO06473	0.252678214500011	1.29776756951147	0.11	0.18	1	ESMs	Scissor_pos_VS_Scissor_neg
KWMTBOMO01986	0.41049068126903	1.29744072924005	0.013	0	1	ESMs	Scissor_pos_VS_Scissor_neg
KWMTBOMO08293	0.600226738271743	1.29700087978136	0.077	0.06	1	ESMs	Scissor_pos_VS_Scissor_neg
KWMTBOMO07848	0.10029515228062	1.2962497547789	0.057	0.12	1	ESMs	Scissor_pos_VS_Scissor_neg
KWMTBOMO14445	0.191270239159994	1.29518786509406	0.027	0.06	1	ESMs	Scissor_pos_VS_Scissor_neg
KWMTBOMO01565	0.41049068126903	1.29499954801044	0.013	0	1	ESMs	Scissor_pos_VS_Scissor_neg
KWMTBOMO12213	0.0491971321647925	1.29447497112913	0.107	0.22	1	ESMs	Scissor_pos_VS_Scissor_neg
KWMTBOMO12761	0.455154250048481	1.29406704420196	0.037	0.06	1	ESMs	Scissor_pos_VS_Scissor_neg
KWMTBOMO08480	0.392764564161722	1.29371870068551	0.014	0	1	ESMs	Scissor_pos_VS_Scissor_neg
KWMTBOMO00541	0.848182494138318	1.2935466474038	0.024	0.02	1	ESMs	Scissor_pos_VS_Scissor_neg
KWMTBOMO13025	0.143654575409303	1.29301049623787	0.049	0.1	1	ESMs	Scissor_pos_VS_Scissor_neg
KWMTBOMO10096	0.124062046359313	1.29257531771701	0.084	0.16	1	ESMs	Scissor_pos_VS_Scissor_neg
KWMTBOMO04506	0.67742728109568	1.29231766977354	0.181	0.24	1	ESMs	Scissor_pos_VS_Scissor_neg
KWMTBOMO15910	0.0293095683683516	1.29176826821358	0.418	0.32	1	ESMs	Scissor_pos_VS_Scissor_neg
KWMTBOMO12759	0.301519638063972	1.29064423856889	0.072	0.12	1	ESMs	Scissor_pos_VS_Scissor_neg
KWMTBOMO11595	0.674643393779605	1.28842577120267	0.194	0.26	1	ESMs	Scissor_pos_VS_Scissor_neg
KWMTBOMO14476	0.717353498495605	1.28818739475086	0.224	0.24	1	ESMs	Scissor_pos_VS_Scissor_neg
KWMTBOMO10244	0.129939517353048	1.28724867024302	0.048	0.1	1	ESMs	Scissor_pos_VS_Scissor_neg
KWMTBOMO01952	0.111360426825822	1.28699412946082	0.034	0.08	1	ESMs	Scissor_pos_VS_Scissor_neg
KWMTBOMO07955	0.463290452931642	1.2858596014072	0.009	0.02	1	ESMs	Scissor_pos_VS_Scissor_neg
KWMTBOMO13294	0.384747634137936	1.28507924492178	0.154	0.12	1	ESMs	Scissor_pos_VS_Scissor_neg
KWMTBOMO03123	0.0633788607219126	1.28494928844657	0.02	0.06	1	ESMs	Scissor_pos_VS_Scissor_neg
KWMTBOMO03094	0.382044106058378	1.28488545052083	0.094	0.06	1	ESMs	Scissor_pos_VS_Scissor_neg
KWMTBOMO14073	0.151831595796457	1.28463638829246	0.062	0.12	1	ESMs	Scissor_pos_VS_Scissor_neg
KWMTBOMO16305	0.0923157360634953	1.28305236023621	0.209	0.12	1	ESMs	Scissor_pos_VS_Scissor_neg
KWMTBOMO15342	0.0357089886300314	1.28285385077278	0.291	0.18	1	ESMs	Scissor_pos_VS_Scissor_neg
KWMTBOMO04971	0.404675304747874	1.28172517694663	0.05	0.08	1	ESMs	Scissor_pos_VS_Scissor_neg
KWMTBOMO13765	0.439947228315992	1.28101644111021	0.387	0.46	1	ESMs	Scissor_pos_VS_Scissor_neg
KWMTBOMO11726	0.883452531050369	1.2805927007703	0.023	0.02	1	ESMs	Scissor_pos_VS_Scissor_neg
KWMTBOMO01488	0.127151950536025	1.28047460966982	0.307	0.24	1	ESMs	Scissor_pos_VS_Scissor_neg
KWMTBOMO15735	0.0245900272196748	1.28041082543158	0.414	0.3	1	ESMs	Scissor_pos_VS_Scissor_neg
KWMTBOMO14105	0.471852822631478	1.28028993800905	0.083	0.12	1	ESMs	Scissor_pos_VS_Scissor_neg
KWMTBOMO11271	0.571770104075532	1.27958824785818	0.19	0.18	1	ESMs	Scissor_pos_VS_Scissor_neg
KWMTBOMO02975	0.105977341795065	1.27911182682806	0.045	0.1	1	ESMs	Scissor_pos_VS_Scissor_neg
KWMTBOMO12078	0.535246548374576	1.27836652249198	0.025	0.04	1	ESMs	Scissor_pos_VS_Scissor_neg
KWMTBOMO13858	0.262961821865916	1.27729591951309	0.07	0.12	1	ESMs	Scissor_pos_VS_Scissor_neg
KWMTBOMO12671	0.244475789768804	1.27712339083457	0.056	0.1	1	ESMs	Scissor_pos_VS_Scissor_neg
KWMTBOMO13801	0.955084106650983	1.27712096777376	0.037	0.04	1	ESMs	Scissor_pos_VS_Scissor_neg
KWMTBOMO12478	0.291007061687731	1.27674919281057	0.178	0.28	1	ESMs	Scissor_pos_VS_Scissor_neg
KWMTBOMO10147	0.048455423410701	1.27624107870668	0.412	0.34	1	ESMs	Scissor_pos_VS_Scissor_neg
KWMTBOMO16095	0.0327554604128194	1.27409543916556	0.036	0.1	1	ESMs	Scissor_pos_VS_Scissor_neg
KWMTBOMO15602	0.496619440438875	1.27378884138143	0.024	0.04	1	ESMs	Scissor_pos_VS_Scissor_neg
KWMTBOMO03013	0.00731998691359239	1.27310367908827	0.518	0.44	1	ESMs	Scissor_pos_VS_Scissor_neg
KWMTBOMO14225	0.230457689948704	1.27266877823346	0.303	0.28	1	ESMs	Scissor_pos_VS_Scissor_neg
KWMTBOMO01054	0.156260461527112	1.27264040555482	0.037	0.08	1	ESMs	Scissor_pos_VS_Scissor_neg
KWMTBOMO05429	0.41049068126903	1.27259283807304	0.013	0	1	ESMs	Scissor_pos_VS_Scissor_neg
KWMTBOMO10781	0.866752528287985	1.27256861375494	0.017	0.02	1	ESMs	Scissor_pos_VS_Scissor_neg
KWMTBOMO07788	0.192935285948809	1.27168144890509	0.039	0.08	1	ESMs	Scissor_pos_VS_Scissor_neg
KWMTBOMO03160	0.0309698460857802	1.27051748307721	0.102	0.22	1	ESMs	Scissor_pos_VS_Scissor_neg
KWMTBOMO06916	0.856768774427309	1.27026651025532	0.034	0.04	1	ESMs	Scissor_pos_VS_Scissor_neg
KWMTBOMO01925	0.508611641624339	1.26976771026584	0.143	0.2	1	ESMs	Scissor_pos_VS_Scissor_neg
KWMTBOMO05747	0.847485575858614	1.26888284236701	0.135	0.14	1	ESMs	Scissor_pos_VS_Scissor_neg
KWMTBOMO11691	0.139491580617099	1.26834525496337	0.061	0.12	1	ESMs	Scissor_pos_VS_Scissor_neg
KWMTBOMO06859	0.34280625333511	1.26729170005525	0.02	0.04	1	ESMs	Scissor_pos_VS_Scissor_neg
KWMTBOMO06976	0.216024083788708	1.2670407898892	0.067	0.12	1	ESMs	Scissor_pos_VS_Scissor_neg
KWMTBOMO12058	0.392764564161722	1.2662283641999	0.014	0	1	ESMs	Scissor_pos_VS_Scissor_neg
KWMTBOMO01513	0.325268783920989	1.26498792626886	0.007	0.02	1	ESMs	Scissor_pos_VS_Scissor_neg
KWMTBOMO08140	0.0824987388702256	1.26495132955397	0.055	0.12	1	ESMs	Scissor_pos_VS_Scissor_neg
KWMTBOMO14583	0.0433722965212715	1.26480139234507	0.06	0.14	1	ESMs	Scissor_pos_VS_Scissor_neg
KWMTBOMO00799	0.169534782962248	1.26465607256384	0.026	0.06	1	ESMs	Scissor_pos_VS_Scissor_neg
KWMTBOMO04201	0.26622017050573	1.26454136134985	0.057	0.1	1	ESMs	Scissor_pos_VS_Scissor_neg
KWMTBOMO09559	0.174584888602056	1.26376213849021	0.038	0.08	1	ESMs	Scissor_pos_VS_Scissor_neg
KWMTBOMO02045	0.235311563650292	1.26321923309115	0.196	0.32	1	ESMs	Scissor_pos_VS_Scissor_neg
KWMTBOMO01668	0.116689656953714	1.2631370469945	0.046	0.1	1	ESMs	Scissor_pos_VS_Scissor_neg
KWMTBOMO05968	1	1.26218902739165	0.02	0.02	1	ESMs	Scissor_pos_VS_Scissor_neg
KWMTBOMO00623	0.26294820867277	1.26213817534478	0.03	0.06	1	ESMs	Scissor_pos_VS_Scissor_neg
KWMTBOMO14248	0.40821827021832	1.26212006340003	0.151	0.12	1	ESMs	Scissor_pos_VS_Scissor_neg
KWMTBOMO03270	0.449577394001291	1.26175218746594	0.011	0	1	ESMs	Scissor_pos_VS_Scissor_neg
KWMTBOMO06591	0.0832962392269579	1.26164521218774	0.091	0.18	1	ESMs	Scissor_pos_VS_Scissor_neg
KWMTBOMO16334	0.471250785953517	1.26124004980101	0.01	0	1	ESMs	Scissor_pos_VS_Scissor_neg
KWMTBOMO03883	0.129279246511078	1.26112707404487	0.048	0.1	1	ESMs	Scissor_pos_VS_Scissor_neg
KWMTBOMO09119	0.0384618967830111	1.26062972716955	0.471	0.44	1	ESMs	Scissor_pos_VS_Scissor_neg
KWMTBOMO03693	0.449577394001291	1.25926264299261	0.011	0	1	ESMs	Scissor_pos_VS_Scissor_neg
KWMTBOMO06742	0.203678816665911	1.25885570744016	0.249	0.2	1	ESMs	Scissor_pos_VS_Scissor_neg
KWMTBOMO13055	0.652570671653177	1.2584739944815	0.012	0.02	1	ESMs	Scissor_pos_VS_Scissor_neg
KWMTBOMO09530	0.147663829004974	1.25829714380467	0.261	0.2	1	ESMs	Scissor_pos_VS_Scissor_neg
KWMTBOMO03313	0.574171117349454	1.25826712834461	0.2	0.28	1	ESMs	Scissor_pos_VS_Scissor_neg
KWMTBOMO12084	0.157378795723277	1.25818964483997	0.05	0.1	1	ESMs	Scissor_pos_VS_Scissor_neg
KWMTBOMO09054	0.157002890813667	1.25629597138634	0.05	0.1	1	ESMs	Scissor_pos_VS_Scissor_neg
KWMTBOMO09659	0.580529829115122	1.25567698133575	0.148	0.2	1	ESMs	Scissor_pos_VS_Scissor_neg
KWMTBOMO09309	0.764953097168224	1.25477723024435	0.014	0.02	1	ESMs	Scissor_pos_VS_Scissor_neg
KWMTBOMO04808	0.128558999817152	1.25397038774939	0.024	0.06	1	ESMs	Scissor_pos_VS_Scissor_neg
KWMTBOMO07790	0.764953097168224	1.25388529123692	0.014	0.02	1	ESMs	Scissor_pos_VS_Scissor_neg
KWMTBOMO02234	0.884965356960921	1.25347929947609	0.023	0.02	1	ESMs	Scissor_pos_VS_Scissor_neg
KWMTBOMO15584	0.595328255477936	1.25297092031038	0.058	0.08	1	ESMs	Scissor_pos_VS_Scissor_neg
KWMTBOMO12376	0.0839775223200258	1.25279523955679	0.145	0.06	1	ESMs	Scissor_pos_VS_Scissor_neg
KWMTBOMO11957	0.419261053177602	1.25079358067299	0.022	0.04	1	ESMs	Scissor_pos_VS_Scissor_neg
KWMTBOMO13963	0.376085885697658	1.25039139996377	0.015	0	1	ESMs	Scissor_pos_VS_Scissor_neg
KWMTBOMO01023	0.429381362943892	1.25034256021438	0.012	0	1	ESMs	Scissor_pos_VS_Scissor_neg
KWMTBOMO13982	0.00672762268767365	1.25000158964543	0.502	0.38	1	ESMs	Scissor_pos_VS_Scissor_neg
KWMTBOMO03964	0.145052534882821	1.24955777682886	0.074	0.14	1	ESMs	Scissor_pos_VS_Scissor_neg
KWMTBOMO11822	0.978448417651813	1.24914865160982	0.057	0.06	1	ESMs	Scissor_pos_VS_Scissor_neg
KWMTBOMO02421	0.00902243652671197	1.24828819848945	0.049	0.14	1	ESMs	Scissor_pos_VS_Scissor_neg
KWMTBOMO11222	0.392764564161722	1.24756428174563	0.014	0	1	ESMs	Scissor_pos_VS_Scissor_neg
KWMTBOMO09899	0.19124116894159	1.24698003339556	0.065	0.12	1	ESMs	Scissor_pos_VS_Scissor_neg
KWMTBOMO14769	0.892699988047647	1.24622868064033	0.035	0.04	1	ESMs	Scissor_pos_VS_Scissor_neg
KWMTBOMO11958	0.0170190207573973	1.24588916921775	0.063	0.16	1	ESMs	Scissor_pos_VS_Scissor_neg
KWMTBOMO16298	0.680585730632884	1.2456839115338	0.029	0.04	1	ESMs	Scissor_pos_VS_Scissor_neg
KWMTBOMO16605	0.000220527949394648	1.24557844596462	0.37	0.08	1	ESMs	Scissor_pos_VS_Scissor_neg
KWMTBOMO07117	0.392077166779258	1.24540459185935	0.213	0.32	1	ESMs	Scissor_pos_VS_Scissor_neg
KWMTBOMO15144	0.529079907986431	1.24512824939839	0.01	0.02	1	ESMs	Scissor_pos_VS_Scissor_neg
KWMTBOMO05713	0.38585655775922	1.24443938728437	0.134	0.2	1	ESMs	Scissor_pos_VS_Scissor_neg
KWMTBOMO07329	0.215937375565342	1.2442887457946	0.054	0.1	1	ESMs	Scissor_pos_VS_Scissor_neg
KWMTBOMO10137	0.926664228236437	1.24325908998893	0.036	0.04	1	ESMs	Scissor_pos_VS_Scissor_neg
KWMTBOMO00877	0.168994691424496	1.24315351610573	0.026	0.06	1	ESMs	Scissor_pos_VS_Scissor_neg
KWMTBOMO07994	0.860450387362043	1.24300064136955	0.034	0.04	1	ESMs	Scissor_pos_VS_Scissor_neg
KWMTBOMO08511	0.440224431737989	1.24133312950162	0.152	0.22	1	ESMs	Scissor_pos_VS_Scissor_neg
KWMTBOMO09932	0.139665006882273	1.23984461826435	0.112	0.2	1	ESMs	Scissor_pos_VS_Scissor_neg
KWMTBOMO14055	0.955607283916772	1.23911115090179	0.202	0.24	1	ESMs	Scissor_pos_VS_Scissor_neg
KWMTBOMO05730	0.589235900039373	1.23910354111404	0.169	0.16	1	ESMs	Scissor_pos_VS_Scissor_neg
KWMTBOMO05489	0.392764564161722	1.23904252340911	0.014	0	1	ESMs	Scissor_pos_VS_Scissor_neg
KWMTBOMO12011	0.921997447205528	1.23716953965921	0.022	0.02	1	ESMs	Scissor_pos_VS_Scissor_neg
KWMTBOMO12770	0.392764564161722	1.23621	0.014	0	1	ESMs	Scissor_pos_VS_Scissor_neg
KWMTBOMO03631	0.457910894162888	1.23605721864116	0.023	0.04	1	ESMs	Scissor_pos_VS_Scissor_neg
KWMTBOMO04676	0.416653922729783	1.2359774886095	0.265	0.26	1	ESMs	Scissor_pos_VS_Scissor_neg
KWMTBOMO06273	0.441911375328036	1.23589778868882	0.125	0.18	1	ESMs	Scissor_pos_VS_Scissor_neg
KWMTBOMO10301	0.245430742894438	1.23589541194972	0.096	0.16	1	ESMs	Scissor_pos_VS_Scissor_neg
KWMTBOMO08736	0.131936041002564	1.23575955066076	0.048	0.1	1	ESMs	Scissor_pos_VS_Scissor_neg
KWMTBOMO02834	0.0119330461307738	1.23438834460347	0.538	0.48	1	ESMs	Scissor_pos_VS_Scissor_neg
KWMTBOMO10038	0.764953097168224	1.23339456790101	0.014	0.02	1	ESMs	Scissor_pos_VS_Scissor_neg
KWMTBOMO02099	0.0832100477556542	1.23327010473377	0.091	0.18	1	ESMs	Scissor_pos_VS_Scissor_neg
KWMTBOMO10416	0.0274576234448279	1.23218479886131	0.035	0.1	1	ESMs	Scissor_pos_VS_Scissor_neg
KWMTBOMO10210	0.592214959482808	1.23200560087958	0.011	0.02	1	ESMs	Scissor_pos_VS_Scissor_neg
KWMTBOMO08558	0.317336471391385	1.23122525221632	0.032	0.06	1	ESMs	Scissor_pos_VS_Scissor_neg
KWMTBOMO12763	0.106553159491104	1.23077227111056	0.045	0.1	1	ESMs	Scissor_pos_VS_Scissor_neg
KWMTBOMO07245	0.00084496336820092	1.23063428718329	0.52	0.34	1	ESMs	Scissor_pos_VS_Scissor_neg
KWMTBOMO05172	0.742679860716839	1.23029808738879	0.236	0.26	1	ESMs	Scissor_pos_VS_Scissor_neg
KWMTBOMO14792	0.866752528287985	1.23022331688167	0.017	0.02	1	ESMs	Scissor_pos_VS_Scissor_neg
KWMTBOMO13000	0.75838369640331	1.22932317658833	0.031	0.04	1	ESMs	Scissor_pos_VS_Scissor_neg
KWMTBOMO08747	0.594240698220476	1.22915861117032	0.12	0.16	1	ESMs	Scissor_pos_VS_Scissor_neg
KWMTBOMO09063	0.335276077597139	1.22909746509433	0.046	0.08	1	ESMs	Scissor_pos_VS_Scissor_neg
KWMTBOMO15134	0.0435787627858655	1.22880112547636	0.118	0.24	1	ESMs	Scissor_pos_VS_Scissor_neg
KWMTBOMO16127	0.0948053990974514	1.22861945040637	0.081	0.16	1	ESMs	Scissor_pos_VS_Scissor_neg
KWMTBOMO15304	0.0163663953870031	1.22842009357392	0.105	0.24	1	ESMs	Scissor_pos_VS_Scissor_neg
KWMTBOMO05673	0.981809965403657	1.22826224066233	0.201	0.24	1	ESMs	Scissor_pos_VS_Scissor_neg
KWMTBOMO13917	0.106593802745777	1.2282353546884	0.086	0.02	1	ESMs	Scissor_pos_VS_Scissor_neg
KWMTBOMO11074	0.000526438682672081	1.22756710282247	0.623	0.48	1	ESMs	Scissor_pos_VS_Scissor_neg
KWMTBOMO04713	0.529079907986431	1.2273447097575	0.01	0.02	1	ESMs	Scissor_pos_VS_Scissor_neg
KWMTBOMO06189	0.88293070190402	1.22650583104981	0.088	0.1	1	ESMs	Scissor_pos_VS_Scissor_neg
KWMTBOMO01133	0.0145088945114546	1.22582702793038	0.041	0.12	1	ESMs	Scissor_pos_VS_Scissor_neg
KWMTBOMO14138	0.0875966176070989	1.22550954923772	0.284	0.2	1	ESMs	Scissor_pos_VS_Scissor_neg
KWMTBOMO14076	0.823266792295322	1.22545038843874	0.149	0.18	1	ESMs	Scissor_pos_VS_Scissor_neg
KWMTBOMO01314	0.125484068188133	1.22504051312549	0.097	0.18	1	ESMs	Scissor_pos_VS_Scissor_neg
KWMTBOMO07947	0.215271003965396	1.22488106608554	0.028	0.06	1	ESMs	Scissor_pos_VS_Scissor_neg
KWMTBOMO05098	0.169534782962248	1.22457086447206	0.026	0.06	1	ESMs	Scissor_pos_VS_Scissor_neg
KWMTBOMO09779	0.0025377447168106	1.22437898991823	0.361	0.16	1	ESMs	Scissor_pos_VS_Scissor_neg
KWMTBOMO06759	0.592368072250936	1.22395292044011	0.202	0.28	1	ESMs	Scissor_pos_VS_Scissor_neg
KWMTBOMO05626	0.710132708729652	1.22384626794872	0.013	0.02	1	ESMs	Scissor_pos_VS_Scissor_neg
KWMTBOMO01328	0.169534782962248	1.22253476131624	0.026	0.06	1	ESMs	Scissor_pos_VS_Scissor_neg
KWMTBOMO07438	0.199356331014632	1.22251764115145	0.015	0.04	1	ESMs	Scissor_pos_VS_Scissor_neg
KWMTBOMO12111	0.0399790168512588	1.22217374775337	0.018	0.06	1	ESMs	Scissor_pos_VS_Scissor_neg
KWMTBOMO12845	0.0217944925682165	1.22152669684134	0.065	0.16	1	ESMs	Scissor_pos_VS_Scissor_neg
KWMTBOMO12117	0.876093375265814	1.22107999523933	0.134	0.14	1	ESMs	Scissor_pos_VS_Scissor_neg
KWMTBOMO06397	0.848182494138318	1.22036756392257	0.024	0.02	1	ESMs	Scissor_pos_VS_Scissor_neg
KWMTBOMO09916	0.170570350157959	1.22036401579623	0.051	0.1	1	ESMs	Scissor_pos_VS_Scissor_neg
KWMTBOMO03720	0.573429594888321	1.22026003250357	0.189	0.18	1	ESMs	Scissor_pos_VS_Scissor_neg
KWMTBOMO00979	0.249833558949161	1.22010559410044	0.069	0.12	1	ESMs	Scissor_pos_VS_Scissor_neg
KWMTBOMO14018	0.110066288453371	1.21966226547665	0.023	0.06	1	ESMs	Scissor_pos_VS_Scissor_neg
KWMTBOMO15326	0.378774064861705	1.21965464601992	0.049	0.08	1	ESMs	Scissor_pos_VS_Scissor_neg
KWMTBOMO09812	0.00132852146546555	1.21841768747066	0.637	0.62	1	ESMs	Scissor_pos_VS_Scissor_neg
KWMTBOMO00839	0.208493557619955	1.21841657168393	0.066	0.12	1	ESMs	Scissor_pos_VS_Scissor_neg
KWMTBOMO03215	0.489149384643493	1.21828751333685	0.038	0.06	1	ESMs	Scissor_pos_VS_Scissor_neg
KWMTBOMO11051	0.547235048954471	1.21815154885356	0.342	0.4	1	ESMs	Scissor_pos_VS_Scissor_neg
KWMTBOMO01523	0.273714188248272	1.21804510062705	0.347	0.34	1	ESMs	Scissor_pos_VS_Scissor_neg
KWMTBOMO10931	0.440381310018536	1.21795032218158	0.052	0.08	1	ESMs	Scissor_pos_VS_Scissor_neg
KWMTBOMO01624	0.293407161940627	1.21783493030062	0.044	0.08	1	ESMs	Scissor_pos_VS_Scissor_neg
KWMTBOMO03616	0.504048045060947	1.21748885740112	0.169	0.24	1	ESMs	Scissor_pos_VS_Scissor_neg
KWMTBOMO02838	0.717288432081006	1.21736611748929	0.03	0.04	1	ESMs	Scissor_pos_VS_Scissor_neg
KWMTBOMO10311	0.317018482063984	1.2171243305059	0.232	0.2	1	ESMs	Scissor_pos_VS_Scissor_neg
KWMTBOMO11008	0.705407069172733	1.21678548029254	0.161	0.16	1	ESMs	Scissor_pos_VS_Scissor_neg
KWMTBOMO01830	0.0257598601151534	1.21678316014942	0.077	0.18	1	ESMs	Scissor_pos_VS_Scissor_neg
KWMTBOMO14671	0.694569806208172	1.2166047322113	0.094	0.12	1	ESMs	Scissor_pos_VS_Scissor_neg
KWMTBOMO06344	0.0105287986965204	1.21635176682396	0.568	0.56	1	ESMs	Scissor_pos_VS_Scissor_neg
KWMTBOMO10336	0.883452531050369	1.21629198595926	0.023	0.02	1	ESMs	Scissor_pos_VS_Scissor_neg
KWMTBOMO12355	0.710132708729652	1.21623532030718	0.013	0.02	1	ESMs	Scissor_pos_VS_Scissor_neg
KWMTBOMO00981	0.449577394001291	1.21581004955263	0.011	0	1	ESMs	Scissor_pos_VS_Scissor_neg
KWMTBOMO05016	0.41049068126903	1.21578825262117	0.013	0	1	ESMs	Scissor_pos_VS_Scissor_neg
KWMTBOMO03447	0.0805191834556673	1.21451284069032	0.311	0.24	1	ESMs	Scissor_pos_VS_Scissor_neg
KWMTBOMO04077	0.710132708729652	1.21284135037329	0.013	0.02	1	ESMs	Scissor_pos_VS_Scissor_neg
KWMTBOMO11482	0.165816342212476	1.21245078678705	0.063	0.12	1	ESMs	Scissor_pos_VS_Scissor_neg
KWMTBOMO01059	0.699963827839759	1.21231086746265	0.268	0.3	1	ESMs	Scissor_pos_VS_Scissor_neg
KWMTBOMO14536	0.97748970834014	1.21188732461931	0.13	0.14	1	ESMs	Scissor_pos_VS_Scissor_neg
KWMTBOMO06216	0.163450090105469	1.21131614164207	0.221	0.14	1	ESMs	Scissor_pos_VS_Scissor_neg
KWMTBOMO12586	0.172753133059595	1.21115192557461	0.038	0.08	1	ESMs	Scissor_pos_VS_Scissor_neg
KWMTBOMO09151	0.398044951129013	1.21105277944325	0.035	0.06	1	ESMs	Scissor_pos_VS_Scissor_neg
KWMTBOMO09282	0.0798981814869756	1.20990746347913	0.265	0.18	1	ESMs	Scissor_pos_VS_Scissor_neg
KWMTBOMO13523	0.496619440438875	1.20884298485328	0.024	0.04	1	ESMs	Scissor_pos_VS_Scissor_neg
KWMTBOMO14795	0.318104022703821	1.20863804551419	0.032	0.06	1	ESMs	Scissor_pos_VS_Scissor_neg
KWMTBOMO11571	0.310769401467541	1.20812	0.088	0.14	1	ESMs	Scissor_pos_VS_Scissor_neg
KWMTBOMO02378	0.893918980786611	1.20715192673516	0.035	0.04	1	ESMs	Scissor_pos_VS_Scissor_neg
KWMTBOMO03007	0.529079907986431	1.20709995915748	0.01	0.02	1	ESMs	Scissor_pos_VS_Scissor_neg
KWMTBOMO07279	0.128306638060152	1.20709373282258	0.072	0.14	1	ESMs	Scissor_pos_VS_Scissor_neg
KWMTBOMO01797	0.673810350321648	1.20617075594179	0.03	0.02	1	ESMs	Scissor_pos_VS_Scissor_neg
KWMTBOMO13307	0.755872896805712	1.20582612175954	0.145	0.18	1	ESMs	Scissor_pos_VS_Scissor_neg
KWMTBOMO04859	0.334291150989955	1.20462299045677	0.313	0.3	1	ESMs	Scissor_pos_VS_Scissor_neg
KWMTBOMO08889	0.122853742212502	1.20424221633498	0.108	0.04	1	ESMs	Scissor_pos_VS_Scissor_neg
KWMTBOMO01050	0.0761430742553752	1.2030627941974	0.042	0.1	1	ESMs	Scissor_pos_VS_Scissor_neg
KWMTBOMO15832	0.00473403726335873	1.20274514405191	0.027	0.1	1	ESMs	Scissor_pos_VS_Scissor_neg
KWMTBOMO11350	0.0327554604128194	1.20230352440772	0.036	0.1	1	ESMs	Scissor_pos_VS_Scissor_neg
KWMTBOMO06422	0.352048598098345	1.20223075282144	0.048	0.08	1	ESMs	Scissor_pos_VS_Scissor_neg
KWMTBOMO03288	0.457845128940887	1.20202959349938	0.037	0.06	1	ESMs	Scissor_pos_VS_Scissor_neg
KWMTBOMO00730	0.710511359896304	1.20197809509375	0.262	0.36	1	ESMs	Scissor_pos_VS_Scissor_neg
KWMTBOMO04513	0.048887471741176	1.2007821715098	0.107	0.22	1	ESMs	Scissor_pos_VS_Scissor_neg
KWMTBOMO07638	0.031510699414285	1.20022485021314	0.364	0.26	1	ESMs	Scissor_pos_VS_Scissor_neg
KWMTBOMO06171	0.719303216009011	1.19986957338568	0.226	0.3	1	ESMs	Scissor_pos_VS_Scissor_neg
KWMTBOMO08385	0.392764564161722	1.1998214593567	0.014	0	1	ESMs	Scissor_pos_VS_Scissor_neg
KWMTBOMO01175	0.0266428927365486	1.19976567929836	0.349	0.24	1	ESMs	Scissor_pos_VS_Scissor_neg
KWMTBOMO00059	0.683925921130188	1.19960109738986	0.125	0.16	1	ESMs	Scissor_pos_VS_Scissor_neg
KWMTBOMO04817	0.449577394001291	1.19936523619226	0.011	0	1	ESMs	Scissor_pos_VS_Scissor_neg
KWMTBOMO03593	0.41049068126903	1.19780051114947	0.013	0	1	ESMs	Scissor_pos_VS_Scissor_neg
KWMTBOMO10384	0.644430229158021	1.1977457981582	0.031	0.02	1	ESMs	Scissor_pos_VS_Scissor_neg
KWMTBOMO02327	0.112045654080406	1.19756231495583	0.034	0.08	1	ESMs	Scissor_pos_VS_Scissor_neg
KWMTBOMO09079	0.471051792151244	1.1970699282127	0.087	0.06	1	ESMs	Scissor_pos_VS_Scissor_neg
KWMTBOMO04179	0.305395789028594	1.1965100282363	0.019	0.04	1	ESMs	Scissor_pos_VS_Scissor_neg
KWMTBOMO12442	0.0201174539636648	1.19601837293749	0.043	0.12	1	ESMs	Scissor_pos_VS_Scissor_neg
KWMTBOMO01982	0.425735976583594	1.19591552030511	0.081	0.12	1	ESMs	Scissor_pos_VS_Scissor_neg
KWMTBOMO04212	0.935073813632724	1.19490974004972	0.08	0.08	1	ESMs	Scissor_pos_VS_Scissor_neg
KWMTBOMO02938	0.391106126278822	1.19442093498517	0.079	0.12	1	ESMs	Scissor_pos_VS_Scissor_neg
KWMTBOMO06359	0.108810320823285	1.19385144284644	0.058	0.12	1	ESMs	Scissor_pos_VS_Scissor_neg
KWMTBOMO04744	0.312185890708779	1.19384773515827	0.045	0.08	1	ESMs	Scissor_pos_VS_Scissor_neg
KWMTBOMO02565	0.287220569996646	1.19338473326334	0.058	0.1	1	ESMs	Scissor_pos_VS_Scissor_neg
[truncated: 6,792 more rows]

## Sheet: 3-NCSs
gene_name	p_val	avg_log2FC	pct.1	pct.2	p_val_adj	CellType	Compare
KWMTBOMO04225	0.00178888651893692	6.32698633147414	0.043	0	1	NCSs	Scissor_pos_VS_Scissor_neg
KWMTBOMO15337	0.0159203999283436	5.93298852857244	0.026	0	1	NCSs	Scissor_pos_VS_Scissor_neg
KWMTBOMO14836	0.0159203999283436	5.67313420512926	0.026	0	1	NCSs	Scissor_pos_VS_Scissor_neg
KWMTBOMO13410	0.0495264643639166	5.20013689673628	0.017	0	1	NCSs	Scissor_pos_VS_Scissor_neg
KWMTBOMO09699	0.0495264643639166	5.15701352391083	0.017	0	1	NCSs	Scissor_pos_VS_Scissor_neg
KWMTBOMO16369	0.0495264643639166	5.15568938179231	0.017	0	1	NCSs	Scissor_pos_VS_Scissor_neg
KWMTBOMO04123	0.0495264643639166	5.09970130499901	0.017	0	1	NCSs	Scissor_pos_VS_Scissor_neg
KWMTBOMO08855	0.0495264643639166	5.09919453657855	0.017	0	1	NCSs	Scissor_pos_VS_Scissor_neg
KWMTBOMO08027	0.0159203999283436	5.05758828037875	0.026	0	1	NCSs	Scissor_pos_VS_Scissor_neg
KWMTBOMO09099	0.0495264643639166	4.94315894318531	0.017	0	1	NCSs	Scissor_pos_VS_Scissor_neg
KWMTBOMO10050	0.0495264643639166	4.90370306759421	0.017	0	1	NCSs	Scissor_pos_VS_Scissor_neg
KWMTBOMO07985	0.0495264643639166	4.88284908884936	0.017	0	1	NCSs	Scissor_pos_VS_Scissor_neg
KWMTBOMO12835	0.0495264643639166	4.81166840840795	0.017	0	1	NCSs	Scissor_pos_VS_Scissor_neg
KWMTBOMO01355	0.0820801754871524	4.81036458759635	0.026	0.004	1	NCSs	Scissor_pos_VS_Scissor_neg
KWMTBOMO14847	0.0495264643639166	4.77976900678311	0.017	0	1	NCSs	Scissor_pos_VS_Scissor_neg
KWMTBOMO09429	0.0495264643639166	4.77475331378678	0.017	0	1	NCSs	Scissor_pos_VS_Scissor_neg
KWMTBOMO04785	0.0159203999283436	4.74841083829307	0.026	0	1	NCSs	Scissor_pos_VS_Scissor_neg
KWMTBOMO00243	0.0820801754871524	4.63171711536087	0.026	0.004	1	NCSs	Scissor_pos_VS_Scissor_neg
KWMTBOMO06139	0.0495264643639166	4.60452962122638	0.017	0	1	NCSs	Scissor_pos_VS_Scissor_neg
KWMTBOMO11457	0.0495264643639166	4.57775830009089	0.017	0	1	NCSs	Scissor_pos_VS_Scissor_neg
KWMTBOMO12721	0.0495264643639166	4.54486454547982	0.017	0	1	NCSs	Scissor_pos_VS_Scissor_neg
KWMTBOMO03543	0.0159203999283436	4.51962272919729	0.026	0	1	NCSs	Scissor_pos_VS_Scissor_neg
KWMTBOMO14514	0.0820801754871524	4.49066411152994	0.026	0.004	1	NCSs	Scissor_pos_VS_Scissor_neg
KWMTBOMO02234	0.216250587891234	4.48612367875919	0.026	0.009	1	NCSs	Scissor_pos_VS_Scissor_neg
KWMTBOMO12741	0.000845956910311874	4.47630280172299	0.094	0.018	1	NCSs	Scissor_pos_VS_Scissor_neg
KWMTBOMO01495	0.0495264643639166	4.47374112933188	0.017	0	1	NCSs	Scissor_pos_VS_Scissor_neg
KWMTBOMO15165	0.0495264643639166	4.43813619488479	0.017	0	1	NCSs	Scissor_pos_VS_Scissor_neg
KWMTBOMO05678	0.0495264643639166	4.43173693367955	0.017	0	1	NCSs	Scissor_pos_VS_Scissor_neg
KWMTBOMO01990	0.0820801754871524	4.41954255276847	0.026	0.004	1	NCSs	Scissor_pos_VS_Scissor_neg
KWMTBOMO01573	0.0820801754871524	4.40168057071054	0.026	0.004	1	NCSs	Scissor_pos_VS_Scissor_neg
KWMTBOMO08661	0.231515009324855	4.34914260793501	0.017	0.004	1	NCSs	Scissor_pos_VS_Scissor_neg
KWMTBOMO03418	0.0159203999283436	4.34006324031747	0.026	0	1	NCSs	Scissor_pos_VS_Scissor_neg
KWMTBOMO11017	0.0495264643639166	4.32719210700078	0.017	0	1	NCSs	Scissor_pos_VS_Scissor_neg
KWMTBOMO14753	0.0495264643639166	4.3089650569453	0.017	0	1	NCSs	Scissor_pos_VS_Scissor_neg
KWMTBOMO05870	0.0495264643639166	4.29685496260808	0.017	0	1	NCSs	Scissor_pos_VS_Scissor_neg
KWMTBOMO11982	0.0495264643639166	4.29540805961385	0.017	0	1	NCSs	Scissor_pos_VS_Scissor_neg
KWMTBOMO15442	0.0495264643639166	4.11771560035973	0.017	0	1	NCSs	Scissor_pos_VS_Scissor_neg
KWMTBOMO08805	0.231515009324855	4.11375958949774	0.017	0.004	1	NCSs	Scissor_pos_VS_Scissor_neg
KWMTBOMO15618	0.0495264643639166	4.0916760827858	0.017	0	1	NCSs	Scissor_pos_VS_Scissor_neg
KWMTBOMO13707	0.0495264643639166	4.08283523229981	0.017	0	1	NCSs	Scissor_pos_VS_Scissor_neg
KWMTBOMO15468	0.231515009324855	4.07221538056545	0.017	0.004	1	NCSs	Scissor_pos_VS_Scissor_neg
KWMTBOMO16478	0.0495264643639166	4.01755373704249	0.017	0	1	NCSs	Scissor_pos_VS_Scissor_neg
KWMTBOMO13785	0.231515009324855	3.99158470513344	0.017	0.004	1	NCSs	Scissor_pos_VS_Scissor_neg
KWMTBOMO08819	0.231515009324855	3.98930034772985	0.017	0.004	1	NCSs	Scissor_pos_VS_Scissor_neg
KWMTBOMO15265	0.0495264643639166	3.98029537789503	0.017	0	1	NCSs	Scissor_pos_VS_Scissor_neg
KWMTBOMO13917	0.231515009324855	3.95596149775251	0.017	0.004	1	NCSs	Scissor_pos_VS_Scissor_neg
KWMTBOMO10760	0.231515009324855	3.94483680620791	0.017	0.004	1	NCSs	Scissor_pos_VS_Scissor_neg
KWMTBOMO06869	0.0288581598895613	3.87201065160973	0.034	0.004	1	NCSs	Scissor_pos_VS_Scissor_neg
KWMTBOMO04791	0.0815197728151856	3.78005201373659	0.043	0.013	1	NCSs	Scissor_pos_VS_Scissor_neg
KWMTBOMO16391	0.604308775425161	3.74099959992868	0.026	0.018	1	NCSs	Scissor_pos_VS_Scissor_neg
KWMTBOMO07638	0.231515009324855	3.73514891992046	0.017	0.004	1	NCSs	Scissor_pos_VS_Scissor_neg
KWMTBOMO10834	0.231515009324855	3.73464663554432	0.017	0.004	1	NCSs	Scissor_pos_VS_Scissor_neg
KWMTBOMO10728	0.231515009324855	3.72670899317484	0.017	0.004	1	NCSs	Scissor_pos_VS_Scissor_neg
KWMTBOMO10515	0.0820801754871524	3.7170105035711	0.026	0.004	1	NCSs	Scissor_pos_VS_Scissor_neg
KWMTBOMO14652	0.494906612486927	3.68849754146756	0.017	0.009	1	NCSs	Scissor_pos_VS_Scissor_neg
KWMTBOMO01042	0.0102593830476124	3.67418944913971	0.043	0.004	1	NCSs	Scissor_pos_VS_Scissor_neg
KWMTBOMO15022	0.087804766106286	3.67167032360424	0.034	0.009	1	NCSs	Scissor_pos_VS_Scissor_neg
KWMTBOMO06574	0.0820801754871524	3.6716271559395	0.026	0.004	1	NCSs	Scissor_pos_VS_Scissor_neg
KWMTBOMO02879	0.231515009324855	3.6596111260342	0.017	0.004	1	NCSs	Scissor_pos_VS_Scissor_neg
KWMTBOMO10109	0.231515009324855	3.6484700271811	0.017	0.004	1	NCSs	Scissor_pos_VS_Scissor_neg
KWMTBOMO09185	0.0868688330806684	3.61745258169395	0.034	0.009	1	NCSs	Scissor_pos_VS_Scissor_neg
KWMTBOMO15324	0.0495264643639166	3.60559228526269	0.017	0	1	NCSs	Scissor_pos_VS_Scissor_neg
KWMTBOMO00652	0.98587563837045	3.60369122826836	0.017	0.018	1	NCSs	Scissor_pos_VS_Scissor_neg
KWMTBOMO04643	1.1738697228256e-06	3.60304539582144	0.231	0.062	0.0198149209212961	NCSs	Scissor_pos_VS_Scissor_neg
KWMTBOMO03158	0.231515009324855	3.56967083826112	0.017	0.004	1	NCSs	Scissor_pos_VS_Scissor_neg
KWMTBOMO01922	0.494906612486927	3.56782297133281	0.017	0.009	1	NCSs	Scissor_pos_VS_Scissor_neg
KWMTBOMO08973	0.0495264643639166	3.53323169149243	0.017	0	1	NCSs	Scissor_pos_VS_Scissor_neg
KWMTBOMO03900	0.231515009324855	3.52529135216734	0.017	0.004	1	NCSs	Scissor_pos_VS_Scissor_neg
KWMTBOMO10824	0.494906612486927	3.50798811608732	0.017	0.009	1	NCSs	Scissor_pos_VS_Scissor_neg
KWMTBOMO06552	0.494906612486927	3.48556439766221	0.017	0.009	1	NCSs	Scissor_pos_VS_Scissor_neg
KWMTBOMO00198	0.0820801754871524	3.47486599242813	0.026	0.004	1	NCSs	Scissor_pos_VS_Scissor_neg
KWMTBOMO06050	0.231515009324855	3.44889	0.017	0.004	1	NCSs	Scissor_pos_VS_Scissor_neg
KWMTBOMO07271	0.81417734162723	3.42698416954152	0.026	0.022	1	NCSs	Scissor_pos_VS_Scissor_neg
KWMTBOMO13575	0.231515009324855	3.42659156987647	0.017	0.004	1	NCSs	Scissor_pos_VS_Scissor_neg
KWMTBOMO08889	0.231515009324855	3.42018331670116	0.017	0.004	1	NCSs	Scissor_pos_VS_Scissor_neg
KWMTBOMO07508	0.0868688330806684	3.41386547983732	0.034	0.009	1	NCSs	Scissor_pos_VS_Scissor_neg
KWMTBOMO15247	0.186001179917657	3.41179879141426	0.034	0.013	1	NCSs	Scissor_pos_VS_Scissor_neg
KWMTBOMO15383	0.231515009324855	3.3904526450192	0.017	0.004	1	NCSs	Scissor_pos_VS_Scissor_neg
KWMTBOMO01587	0.0495264643639166	3.34903020980647	0.017	0	1	NCSs	Scissor_pos_VS_Scissor_neg
KWMTBOMO05429	0.769343758203639	3.3430482327269	0.017	0.013	1	NCSs	Scissor_pos_VS_Scissor_neg
KWMTBOMO03693	0.231515009324855	3.31248906665736	0.017	0.004	1	NCSs	Scissor_pos_VS_Scissor_neg
KWMTBOMO04078	0.214202469015939	3.31090252394404	0.026	0.009	1	NCSs	Scissor_pos_VS_Scissor_neg
KWMTBOMO07314	0.214202469015939	3.30384561222446	0.026	0.009	1	NCSs	Scissor_pos_VS_Scissor_neg
KWMTBOMO13579	0.109868860908368	3.2952634724423	0.06	0.027	1	NCSs	Scissor_pos_VS_Scissor_neg
KWMTBOMO04277	0.157822380218465	3.27123074400523	0.043	0.018	1	NCSs	Scissor_pos_VS_Scissor_neg
KWMTBOMO12367	0.769343758203639	3.25199528559431	0.017	0.013	1	NCSs	Scissor_pos_VS_Scissor_neg
KWMTBOMO13236	0.494906612486927	3.24488127157487	0.017	0.009	1	NCSs	Scissor_pos_VS_Scissor_neg
KWMTBOMO13919	0.512065040474668	3.24230420363028	0.009	0.018	1	NCSs	Scissor_pos_VS_Scissor_neg
KWMTBOMO09804	0.231515009324855	3.23715416909291	0.017	0.004	1	NCSs	Scissor_pos_VS_Scissor_neg
KWMTBOMO02414	0.262191495697561	3.18981	0.043	0.022	1	NCSs	Scissor_pos_VS_Scissor_neg
KWMTBOMO13535	0.231515009324855	3.18974266782147	0.017	0.004	1	NCSs	Scissor_pos_VS_Scissor_neg
KWMTBOMO07998	0.231515009324855	3.1843984101163	0.017	0.004	1	NCSs	Scissor_pos_VS_Scissor_neg
KWMTBOMO00060	0.231515009324855	3.17084798414182	0.017	0.004	1	NCSs	Scissor_pos_VS_Scissor_neg
KWMTBOMO11534	0.231515009324855	3.1623110410414	0.017	0.004	1	NCSs	Scissor_pos_VS_Scissor_neg
KWMTBOMO15908	0.231515009324855	3.14404665046161	0.017	0.004	1	NCSs	Scissor_pos_VS_Scissor_neg
KWMTBOMO10407	0.214202469015939	3.13453273525331	0.026	0.009	1	NCSs	Scissor_pos_VS_Scissor_neg
KWMTBOMO03117	0.134200012116414	3.1037104537677	0.051	0.022	1	NCSs	Scissor_pos_VS_Scissor_neg
KWMTBOMO14515	0.231515009324855	3.08339533948046	0.017	0.004	1	NCSs	Scissor_pos_VS_Scissor_neg
KWMTBOMO03851	0.231515009324855	3.06850024998562	0.017	0.004	1	NCSs	Scissor_pos_VS_Scissor_neg
KWMTBOMO04808	0.483283314676112	3.06741668222342	0.034	0.022	1	NCSs	Scissor_pos_VS_Scissor_neg
KWMTBOMO10240	0.833091938382433	3.04124986135064	0.034	0.031	1	NCSs	Scissor_pos_VS_Scissor_neg
KWMTBOMO03462	0.030096306783096	3.01878529103859	0.034	0.004	1	NCSs	Scissor_pos_VS_Scissor_neg
KWMTBOMO00952	0.32399022990196	3.01724784592289	0.034	0.018	1	NCSs	Scissor_pos_VS_Scissor_neg
KWMTBOMO04375	0.769343758203639	3.00979310063788	0.017	0.013	1	NCSs	Scissor_pos_VS_Scissor_neg
KWMTBOMO11675	0.0550909777550342	3.00532242203261	0.068	0.027	1	NCSs	Scissor_pos_VS_Scissor_neg
KWMTBOMO00577	0.70863457256117	2.97608981458861	0.009	0.013	1	NCSs	Scissor_pos_VS_Scissor_neg
KWMTBOMO16259	0.494906612486927	2.96675693712982	0.017	0.009	1	NCSs	Scissor_pos_VS_Scissor_neg
KWMTBOMO10235	0.231515009324855	2.92861996815661	0.017	0.004	1	NCSs	Scissor_pos_VS_Scissor_neg
KWMTBOMO03046	0.494906612486927	2.92338634768945	0.017	0.009	1	NCSs	Scissor_pos_VS_Scissor_neg
KWMTBOMO11596	0.70863457256117	2.92031240170111	0.009	0.013	1	NCSs	Scissor_pos_VS_Scissor_neg
KWMTBOMO10959	0.494906612486927	2.90388379266683	0.017	0.009	1	NCSs	Scissor_pos_VS_Scissor_neg
KWMTBOMO10115	0.231515009324855	2.90346050602922	0.017	0.004	1	NCSs	Scissor_pos_VS_Scissor_neg
KWMTBOMO03567	0.231515009324855	2.90208076171059	0.017	0.004	1	NCSs	Scissor_pos_VS_Scissor_neg
KWMTBOMO14235	0.0815197728151856	2.89877	0.043	0.013	1	NCSs	Scissor_pos_VS_Scissor_neg
KWMTBOMO05007	0.231515009324855	2.88709872668551	0.017	0.004	1	NCSs	Scissor_pos_VS_Scissor_neg
KWMTBOMO13552	0.494906612486927	2.8628353703077	0.017	0.009	1	NCSs	Scissor_pos_VS_Scissor_neg
KWMTBOMO10075	0.231515009324855	2.85343183730993	0.017	0.004	1	NCSs	Scissor_pos_VS_Scissor_neg
KWMTBOMO15480	0.391930305447877	2.84921589086761	0.043	0.027	1	NCSs	Scissor_pos_VS_Scissor_neg
KWMTBOMO10140	0.0678912301117056	2.83812123065026	0.137	0.084	1	NCSs	Scissor_pos_VS_Scissor_neg
KWMTBOMO11025	0.98587563837045	2.83755581169065	0.017	0.018	1	NCSs	Scissor_pos_VS_Scissor_neg
KWMTBOMO00540	0.0262720066476528	2.83338943481021	0.077	0.027	1	NCSs	Scissor_pos_VS_Scissor_neg
KWMTBOMO15193	0.491083065248564	2.82836539188374	0.034	0.022	1	NCSs	Scissor_pos_VS_Scissor_neg
KWMTBOMO05992	0.231515009324855	2.82333616098229	0.017	0.004	1	NCSs	Scissor_pos_VS_Scissor_neg
KWMTBOMO13963	0.494906612486927	2.82140540666922	0.017	0.009	1	NCSs	Scissor_pos_VS_Scissor_neg
KWMTBOMO05560	0.0830692416799382	2.76584096066161	0.043	0.013	1	NCSs	Scissor_pos_VS_Scissor_neg
KWMTBOMO12344	0.0751774143594856	2.76508954636487	0.051	0.018	1	NCSs	Scissor_pos_VS_Scissor_neg
KWMTBOMO12109	0.660352765795174	2.76228842162636	0.034	0.027	1	NCSs	Scissor_pos_VS_Scissor_neg
KWMTBOMO09569	0.434014531528205	2.76051944665475	0.051	0.035	1	NCSs	Scissor_pos_VS_Scissor_neg
KWMTBOMO11645	0.494906612486927	2.75400531790637	0.017	0.009	1	NCSs	Scissor_pos_VS_Scissor_neg
KWMTBOMO01521	0.0302784291576288	2.7490865886393	0.068	0.022	1	NCSs	Scissor_pos_VS_Scissor_neg
KWMTBOMO05968	0.485875734369721	2.74338038982596	0.034	0.022	1	NCSs	Scissor_pos_VS_Scissor_neg
KWMTBOMO10530	0.769343758203639	2.74150319442206	0.017	0.013	1	NCSs	Scissor_pos_VS_Scissor_neg
KWMTBOMO06852	0.187566633683146	2.72585044160697	0.034	0.013	1	NCSs	Scissor_pos_VS_Scissor_neg
KWMTBOMO12001	0.769343758203639	2.71899889916858	0.017	0.013	1	NCSs	Scissor_pos_VS_Scissor_neg
KWMTBOMO13725	0.159046603745261	2.70931862328275	0.043	0.018	1	NCSs	Scissor_pos_VS_Scissor_neg
KWMTBOMO11523	0.604308775425161	2.70841208067339	0.026	0.018	1	NCSs	Scissor_pos_VS_Scissor_neg
KWMTBOMO01870	0.494906612486927	2.70705523087178	0.017	0.009	1	NCSs	Scissor_pos_VS_Scissor_neg
KWMTBOMO15744	0.494906612486927	2.70311981474453	0.017	0.009	1	NCSs	Scissor_pos_VS_Scissor_neg
KWMTBOMO05394	0.00200096684635365	2.70233698624976	0.12	0.035	1	NCSs	Scissor_pos_VS_Scissor_neg
KWMTBOMO04105	0.216250587891234	2.70127136486168	0.026	0.009	1	NCSs	Scissor_pos_VS_Scissor_neg
KWMTBOMO12731	0.657500146175382	2.69991236368924	0.034	0.027	1	NCSs	Scissor_pos_VS_Scissor_neg
KWMTBOMO09580	0.231515009324855	2.6928234688539	0.017	0.004	1	NCSs	Scissor_pos_VS_Scissor_neg
KWMTBOMO15117	0.769343758203639	2.69268370691187	0.017	0.013	1	NCSs	Scissor_pos_VS_Scissor_neg
KWMTBOMO14592	0.321839665192501	2.68984043628119	0.034	0.018	1	NCSs	Scissor_pos_VS_Scissor_neg
KWMTBOMO14101	0.769343758203639	2.68624589646691	0.017	0.013	1	NCSs	Scissor_pos_VS_Scissor_neg
KWMTBOMO01946	0.566119242911612	2.67530901527757	0.051	0.04	1	NCSs	Scissor_pos_VS_Scissor_neg
KWMTBOMO01827	0.00125643057436562	2.6670000383915	0.145	0.049	1	NCSs	Scissor_pos_VS_Scissor_neg
KWMTBOMO09544	3.67525566989132e-22	2.66607345437505	0.735	0.296	6.20383157077654e-18	NCSs	Scissor_pos_VS_Scissor_neg
KWMTBOMO04282	0.022346262453091	2.65152117468552	0.085	0.031	1	NCSs	Scissor_pos_VS_Scissor_neg
KWMTBOMO11662	0.214202469015939	2.64747271115623	0.026	0.009	1	NCSs	Scissor_pos_VS_Scissor_neg
KWMTBOMO02235	0.494906612486927	2.62289058517339	0.017	0.009	1	NCSs	Scissor_pos_VS_Scissor_neg
KWMTBOMO13135	0.265560570919205	2.6226686393572	0.043	0.022	1	NCSs	Scissor_pos_VS_Scissor_neg
KWMTBOMO12381	0.0831729827808074	2.61575439536816	0.026	0.004	1	NCSs	Scissor_pos_VS_Scissor_neg
KWMTBOMO05043	0.70863457256117	2.61084921577477	0.009	0.013	1	NCSs	Scissor_pos_VS_Scissor_neg
KWMTBOMO04369	0.81417734162723	2.60689186748351	0.026	0.022	1	NCSs	Scissor_pos_VS_Scissor_neg
KWMTBOMO09435	0.315686186903648	2.60571585742004	0.051	0.031	1	NCSs	Scissor_pos_VS_Scissor_neg
KWMTBOMO10391	0.234304508307436	2.58709772274089	0.017	0.004	1	NCSs	Scissor_pos_VS_Scissor_neg
KWMTBOMO04642	0.216250587891234	2.57273952832689	0.026	0.009	1	NCSs	Scissor_pos_VS_Scissor_neg
KWMTBOMO01340	0.187566633683146	2.56727560224358	0.034	0.013	1	NCSs	Scissor_pos_VS_Scissor_neg
KWMTBOMO01453	0.0559458739684441	2.56613837047368	0.068	0.027	1	NCSs	Scissor_pos_VS_Scissor_neg
KWMTBOMO13464	0.70863457256117	2.55491817591417	0.009	0.013	1	NCSs	Scissor_pos_VS_Scissor_neg
KWMTBOMO02237	0.214202469015939	2.55219868526056	0.026	0.009	1	NCSs	Scissor_pos_VS_Scissor_neg
KWMTBOMO15571	0.0296786121266881	2.54066923092209	0.034	0.004	1	NCSs	Scissor_pos_VS_Scissor_neg
KWMTBOMO12474	0.660352765795174	2.53545911792831	0.034	0.027	1	NCSs	Scissor_pos_VS_Scissor_neg
KWMTBOMO01797	0.701251512861341	2.53319016212352	0.034	0.044	1	NCSs	Scissor_pos_VS_Scissor_neg
KWMTBOMO12116	0.234304508307436	2.53126851164084	0.017	0.004	1	NCSs	Scissor_pos_VS_Scissor_neg
KWMTBOMO13860	0.18914179216071	2.52672230834554	0.034	0.013	1	NCSs	Scissor_pos_VS_Scissor_neg
KWMTBOMO03794	1	2.52481666042118	0.034	0.035	1	NCSs	Scissor_pos_VS_Scissor_neg
[truncated: 7,545 more rows]

## Sheet: 4-CSSs
gene_name	p_val	avg_log2FC	pct.1	pct.2	p_val_adj	CellType	Compare
[truncated: 9,099 more rows]

[truncated: 1 more sheets: 5-all scissor+ cells]
