# Supplementary material for: A silkworm model reveals coordinated cellular communities and conserved Hippo regulation in silk production
Source: Research Square preprint supplement (doi:10.21203/rs.3.rs-7747598/v1), 2025-10-01
Supplement: Supplementary file 57 [file Supplementary Data 4.xlsx]

## Sheet: main
Supplementary Data 4. Numbers of Scissor+/Scissor- cells in each cell state.

## Sheet: numbers
	state 1	state 2	state 3
Scissor+ cells	1150	590	809
Scissor- cells	1164	121	332
Bacground cells	10891	12636	11784
