# Supplementary material for: A silkworm model reveals coordinated cellular communities and conserved Hippo regulation in silk production
Source: Research Square preprint supplement (doi:10.21203/rs.3.rs-7747598/v1), 2025-10-01
Supplement: Supplementary file 61 [file Supplementary Data 5.xlsx]

## Sheet: main
Supplementary Data 5. Pseudotime heatmaps of genes in each cluster in the SG.

## Sheet:  pseudotime heatmap genes
gene_cluster	gene_name
Cluster 1	KWMTBOMO00922
	KWMTBOMO04757
	KWMTBOMO02563
	KWMTBOMO01001
	KWMTBOMO03537
	KWMTBOMO06292
	KWMTBOMO00973
	KWMTBOMO06311
	KWMTBOMO03208
	KWMTBOMO05211
	KWMTBOMO01591
	KWMTBOMO01592
	KWMTBOMO03422
	KWMTBOMO01927
	KWMTBOMO00390
	KWMTBOMO03573
	KWMTBOMO05301
	KWMTBOMO01522
	KWMTBOMO02538
	KWMTBOMO02542
	KWMTBOMO00971
	KWMTBOMO01095
	KWMTBOMO04571
	KWMTBOMO06216
Cluster 2	KWMTBOMO03097
	KWMTBOMO00938
	KWMTBOMO04274
	KWMTBOMO05364
	KWMTBOMO06300
	KWMTBOMO04859
	KWMTBOMO05019
	KWMTBOMO04062
	KWMTBOMO03558
	KWMTBOMO02729
	KWMTBOMO05775
	KWMTBOMO04683
	KWMTBOMO05000
	KWMTBOMO01027
	KWMTBOMO03312
	KWMTBOMO04068
	KWMTBOMO01908
	KWMTBOMO02621
	KWMTBOMO02712
	KWMTBOMO01266
	KWMTBOMO02253
Cluster 3	KWMTBOMO01538
	KWMTBOMO01537
	KWMTBOMO03424
	KWMTBOMO01542
	KWMTBOMO03936
