# Supplementary material for: A silkworm model reveals coordinated cellular communities and conserved Hippo regulation in silk production
Source: Research Square preprint supplement (doi:10.21203/rs.3.rs-7747598/v1), 2025-10-01
Supplement: Supplementary file 65 [file Supplementary Data 6.xlsx]

## Sheet: main
Supplementary Data 6.Genes in each module.

## Sheet: All genes 
	gene_name	module	color	kME_grey	kME_CellTypeAll.M1	kME_CellTypeAll.M2	kME_CellTypeAll.M3	kME_CellTypeAll.M4	kME_CellTypeAll.M5	kME_CellTypeAll.M6	kME_CellTypeAll.M7	kME_CellTypeAll.M8	kME_CellTypeAll.M9	kME_CellTypeAll.M10	kME_CellTypeAll.M11	kME_CellTypeAll.M12
1	KWMTBOMO00006	CellTypeAll-M1	greenyellow	0.170593494537337	0.304580844234221	0.181085353825372	-0.0396929	-0.00540115	0.22128745841323	0.0402941981269339	-0.0926484	0.0340563831550747	-0.0860485	0.151197373471457	-0.0527026	0.0212734435161791
2	KWMTBOMO00051	CellTypeAll-M2	turquoise	0.393422879915757	0.303598850328164	0.453430006820274	0.0357228082742358	0.136999888602753	0.455531832599029	-0.0110165	-0.21788	0.23907329106669	-0.158871	0.215118124424649	-0.0488177	-0.0476246
3	KWMTBOMO00057	CellTypeAll-M2	turquoise	0.187699406700355	0.265416050669879	0.264007904515415	-0.0750082	-0.013486	0.26778170581032	-0.0241225	-0.174925	0.147530815819109	-0.107796	0.194501832970936	-0.0390267	0.0145101152986609
4	KWMTBOMO00073	CellTypeAll-M3	red	0.0449411580698179	-0.107446	-0.0458667	0.24646898645447	0.161492124791874	-0.0141239	0.0171582714156789	0.204147673197954	-0.113426	0.0785413758853006	-0.15247	0.0323506167718507	-0.0495973
5	KWMTBOMO00106	CellTypeAll-M2	turquoise	0.22029599677193	0.125331762277204	0.266335444378255	-0.0127737	-0.00677775	0.179645146762903	-0.104851	-0.144268	0.251944407548528	0.0426740678690992	0.180992998535466	0.122373446311801	0.0893382366695473
6	KWMTBOMO00109	CellTypeAll-M2	turquoise	0.155184743779676	0.118280210916711	0.175563067206516	0.0102615105039656	0.0333624241213562	0.161105897051118	-0.0237191	-0.0730704	0.105911955648859	-0.0285715	0.0915301988172188	0.0125880263696494	0.00791940030382591
7	KWMTBOMO00127	CellTypeAll-M4	tan	0.0669176083004911	-0.0947988	-0.0102915	0.244719201261417	0.370987434725715	0.0937835880030179	0.213717536269205	0.176320921728751	-0.149607	-0.059056	-0.18993	-0.094301	-0.170963
8	KWMTBOMO00129	CellTypeAll-M2	turquoise	0.196651158022573	0.167201150516149	0.249147022254394	0.0249069541187066	0.0687323968719084	0.259031842212824	-0.0442702	-0.108436	0.122263672307996	-0.0882676	0.107322596094989	-0.0331287	-0.0436579
9	KWMTBOMO00153	CellTypeAll-M2	turquoise	0.192091372863114	0.215445240991527	0.245516439194458	-0.0509768	-0.0241214	0.222839301464113	-0.0637265	-0.152147	0.165162144960023	-0.0584391	0.175100137217356	0.00666956117220413	0.0304880290295892
10	KWMTBOMO00157	CellTypeAll-M5	brown	0.284342796713939	0.220283370965493	0.324909334378846	0.0533572156452592	0.111335982449418	0.350904493263059	-0.0324073	-0.135191	0.160337841604317	-0.108821	0.14908671303291	-0.0359329	-0.0550074
11	KWMTBOMO00160	CellTypeAll-M2	turquoise	0.220829041470431	0.188117937899886	0.266240241352237	0.0305456254234628	0.0732814128465577	0.266740506225354	-0.0339751	-0.117409	0.147496464369024	-0.0695139	0.135610890888349	-0.0104121	-0.0120062
12	KWMTBOMO00167	CellTypeAll-M5	brown	0.261173214958351	0.297207829731895	0.306577720034741	0.00494299376788711	0.0955677017238154	0.363646531338827	0.028062082394289	-0.138262	0.116950538095836	-0.149169	0.152487936115035	-0.0829024	-0.0384019
13	KWMTBOMO00182	CellTypeAll-M2	turquoise	0.175362256974356	0.173383162538482	0.250625751198673	-0.0474028	-0.00713721	0.225792590313419	-0.0636558	-0.155983	0.170443279571561	-0.0709385	0.152881498901519	-0.00173221	0.00425980786948011
14	KWMTBOMO00184	CellTypeAll-M6	yellow	-0.0356263	-0.144477	-0.117477	0.117158314329378	0.173579599617452	-0.0812658	0.375262406790348	0.20879193727169	-0.156657	0.0438615925025762	-0.20535	-0.0140733	-0.0570714
15	KWMTBOMO00190	CellTypeAll-M2	turquoise	0.274306244190492	0.381959524808281	0.451731234893296	-0.269176	-0.171205	0.363027269337948	-0.138663	-0.446087	0.422673446585632	-0.12575	0.43976232520403	0.0408869091797326	0.157536994429789
16	KWMTBOMO00201	CellTypeAll-M4	tan	0.100169897641386	-0.0858235	-0.0298573	0.316993368312767	0.338117311443975	0.0691123827295027	0.20425679644791	0.299377423426677	-0.19043	0.0279245390956883	-0.22958	-0.0489847	-0.164284
17	KWMTBOMO00209	CellTypeAll-M5	brown	0.109739181940068	0.261161479525821	0.180810359389905	0.00895522395053125	0.176424470306409	0.413791466099895	0.150785202696951	-0.142963	-0.0840868	-0.338575	0.0361274947026696	-0.289147	-0.258621
18	KWMTBOMO00210	CellTypeAll-M2	turquoise	0.184568029273946	0.138501003338251	0.226957398740918	-0.00963459	0.00679878694134288	0.174550362371761	-0.0682944	-0.107051	0.167037006030733	-0.0145431	0.126995528873778	0.0408738427869529	0.0318875843171439
19	KWMTBOMO00211	CellTypeAll-M5	brown	0.220971091804748	0.113423782318739	0.201813535866613	0.224175336964615	0.268275676446266	0.300508506075172	-0.000435827	0.0381327946425424	-0.0207033	-0.0994456	-0.0263272	-0.091183	-0.150119
20	KWMTBOMO00214	CellTypeAll-M2	turquoise	0.220492306899629	0.130552228907909	0.236666817335909	0.0274195699170253	0.0317107784043761	0.182569832042986	-0.0554599	-0.0755664	0.166532217822011	-0.00365298	0.114219122135031	0.0522778103624417	0.0246054269193226
21	KWMTBOMO00238	CellTypeAll-M7	green	-0.0486323	-0.376565	-0.31749	0.565723960312794	0.359230239945238	-0.251501	0.149488330727825	0.703664397518396	-0.420957	0.312886298527858	-0.527786	0.0897716125067604	-0.167776
22	KWMTBOMO00254	CellTypeAll-M7	green	-0.0738667	-0.287799	-0.289317	0.303811137822672	0.0829869962277084	-0.31618	-0.0122103	0.548201982166306	-0.25643	0.410092560140965	-0.348815	0.214908407377153	0.0168466360775385
23	KWMTBOMO00277	CellTypeAll-M1	greenyellow	0.15556073936462	0.292397389340684	0.180196204511372	-0.0562118	-0.0515032	0.22491383997193	-0.0665426	-0.138036	0.0483758464272642	-0.0851825	0.17150848116981	-0.0461524	-0.000835914
24	KWMTBOMO00293	CellTypeAll-M3	red	0.0581359582303675	-0.0854624	-0.0479292	0.338497573887649	0.230984017002894	0.0479120520006187	0.0188255692232382	0.186628146477923	-0.158621	0.0116858145635175	-0.16143	-0.0402522	-0.1252
25	KWMTBOMO00300	CellTypeAll-M8	blue	0.228153714459387	0.122544679353983	0.271798584256584	-0.0635335	-0.039777	0.152234482702168	-0.107862	-0.194195	0.327258682147379	0.0614290359326835	0.241793311845982	0.158964629815695	0.145927982261872
26	KWMTBOMO00302	CellTypeAll-M7	green	0.0713552123614713	-0.11411	-0.0826281	0.192987759607638	0.0451416928954677	-0.134071	-0.0323651	0.310251701501233	-0.0683572	0.288500819832722	-0.141394	0.197435196904282	0.0653917535141026
27	KWMTBOMO00327	CellTypeAll-M2	turquoise	0.275856819287476	0.12855013967123	0.278962331066438	0.0871273795507206	0.0842070940157084	0.223923817901015	-0.0721195	-0.0597766	0.181238052275953	0.00787287202381736	0.109205383933535	0.0638832185933215	0.00949975007169816
28	KWMTBOMO00339	CellTypeAll-M9	pink	0.137756590129976	-0.122497	0.0113999718636212	0.139124303152037	-0.0522328	-0.168517	-0.178985	0.11536663495359	0.21763599696076	0.505279856284082	0.0808047476722873	0.485899079303245	0.407928728800766
29	KWMTBOMO00352	CellTypeAll-M2	turquoise	0.17367775666025	0.12498718965404	0.182438676806943	0.0263078910354152	0.0341535683305884	0.163224969997413	-0.0393596	-0.0655991	0.106892485983374	-0.0202361	0.0929785989110251	0.0196717514903462	0.00624167002017175
30	KWMTBOMO00354	CellTypeAll-M6	yellow	-0.242007	-0.195893	-0.219542	-0.111995	0.222626989767942	-0.136926	0.863449017079335	0.171848600843068	-0.266963	-0.245534	-0.263836	-0.287448	-0.132394
31	KWMTBOMO00373	CellTypeAll-M2	turquoise	0.243888808289873	0.301102018878898	0.377436703808915	-0.163337	-0.0974381	0.309611380666234	-0.102942	-0.298029	0.308944192444885	-0.102338	0.294565394522992	0.0203303396479945	0.0745550407829871
32	KWMTBOMO00375	CellTypeAll-M10	purple	0.336247365006725	0.328164581201682	0.403528161637773	-0.0331224	-0.00712867	0.346273280669971	-0.100575	-0.228842	0.298585115001579	-0.0602937	0.327520164216662	0.0470836665873802	0.105192760303087
33	KWMTBOMO00379	CellTypeAll-M6	yellow	0.0286481722284043	0.00552956768308194	0.053521503130789	-0.0365914	0.198951404178211	0.140225262260892	0.399079015270151	-0.0256724	-0.0375459	-0.191202	-0.0671273	-0.163372	-0.136583
34	KWMTBOMO00382	CellTypeAll-M2	turquoise	0.185146740223172	0.146004630591464	0.245493353290917	0.00232066589319001	0.0441270449756191	0.242791793566808	-0.0478552	-0.121671	0.137337528430079	-0.0801314	0.111097015766656	-0.0233527	-0.0404236
35	KWMTBOMO00390	CellTypeAll-M10	purple	0.287764783976064	0.553219789781123	0.504923815466931	-0.387873	-0.330433	0.35723109014509	-0.279149	-0.604957	0.565916566544667	-0.0798874	0.669474932518821	0.143653432422769	0.382411378948723
36	KWMTBOMO00392	CellTypeAll-M5	brown	0.361205703377809	0.296771885086374	0.373377048496368	0.120148914156105	0.135158273678766	0.433342135810738	-0.098083	-0.138368	0.135198813053033	-0.131464	0.166455157103373	-0.0578096	-0.0811747
37	KWMTBOMO00403	CellTypeAll-M6	yellow	-0.0806089	-0.0269448	-0.0980552	-0.0435683	0.157680034625788	-0.0161164	0.637834925136923	0.123700157569053	-0.194386	-0.173621	-0.128635	-0.206434	-0.0775505
38	KWMTBOMO00411	CellTypeAll-M2	turquoise	0.185329136690166	0.169401097448427	0.250495079996086	-0.0676925	-0.0369878	0.189168817221527	-0.0758795	-0.175234	0.223081364453954	-0.024467	0.20219989803208	0.0522241303038504	0.0740409389544971
39	KWMTBOMO00422	CellTypeAll-M7	green	0.00594947517354172	-0.169477	-0.144976	0.272641409121114	0.116961987123272	-0.145683	-0.0485774	0.364266620626741	-0.176678	0.258396126893833	-0.248414	0.14301894505715	-0.0236964
40	KWMTBOMO00424	CellTypeAll-M7	green	0.00311275445675538	-0.116586	-0.107326	0.196216731766103	0.0698774783747212	-0.115715	-0.0471754	0.260460206009158	-0.11457	0.217756030414899	-0.165638	0.130261408543491	-0.00103356
41	KWMTBOMO00425	CellTypeAll-M5	brown	0.147638125325376	0.0501626812695138	0.113594635350143	0.240578127511932	0.344122169765743	0.259693767867747	0.139907299171251	0.0885307591163035	-0.107958	-0.135147	-0.109585	-0.144594	-0.206903
42	KWMTBOMO00437	CellTypeAll-M2	turquoise	0.159560543179523	0.117158248767533	0.190304639878954	0.0218820467043599	0.0507876968021319	0.184610784600615	-0.0307122	-0.0791565	0.107155169556319	-0.0470184	0.0827029276296139	-0.00351085	-0.0162448
43	KWMTBOMO00462	CellTypeAll-M2	turquoise	0.366936486710877	0.390857182629263	0.487595731007034	-0.131029	-0.0882507	0.363789108905508	-0.146127	-0.366315	0.4546679748121	-0.0345559	0.430544128321695	0.132558063479026	0.233575957468454
44	KWMTBOMO00464	CellTypeAll-M3	red	0.116428984850521	-0.0735668	-0.0137592	0.365217473908406	0.294723717977953	0.053396733954772	0.0172205743295028	0.289147851963906	-0.16367	0.103808200049563	-0.199577	0.0286359057876691	-0.122043
45	KWMTBOMO00472	CellTypeAll-M2	turquoise	0.225871855747301	0.385139490325464	0.335751171580809	-0.157602	-0.120584	0.29294888490471	-0.121926	-0.273943	0.247612874608304	-0.105418	0.303259859953605	-0.00136488	0.118500100727806
46	KWMTBOMO00473	CellTypeAll-M7	green	0.162490237872791	-0.0767313	0.0346504405370342	0.246013606971284	0.0991121083349081	-0.0254591	-0.0871146	0.262547747458673	0.0172244331452207	0.261102980862161	-0.0840971	0.19489250253115	0.0343234390508722
47	KWMTBOMO00487	CellTypeAll-M8	blue	0.144031117632503	0.0139599013112712	0.13375569089065	-0.0708268	-0.103848	0.0126336679354211	-0.0896779	-0.132399	0.307574766730055	0.192576876782744	0.205613051945492	0.249744697925268	0.229271905265056
48	KWMTBOMO00496	CellTypeAll-M6	yellow	-0.179278	-0.150069	-0.167421	-0.0760738	0.233467471215712	-0.0741098	0.753681413416482	0.134015428056865	-0.215338	-0.213594	-0.206711	-0.244708	-0.122501
49	KWMTBOMO00498	CellTypeAll-M6	yellow	-0.229995	-0.247701	-0.272599	-0.0475409	0.163588314487551	-0.218639	0.686047697216634	0.286472944695659	-0.276294	-0.0791841	-0.313187	-0.181003	-0.12103
50	KWMTBOMO00501	CellTypeAll-M5	brown	0.164013898909451	0.23950412037831	0.194863228188319	-0.000758994	0.0310367039416403	0.285567366210539	-0.050241	-0.124437	0.0400453125274943	-0.12272	0.12531870419086	-0.0874167	-0.0820974
51	KWMTBOMO00525	CellTypeAll-M5	brown	0.231988732484216	0.206728433798678	0.240163841013295	0.148595285899621	0.141279347875283	0.341135716404244	-0.0988772	-0.0667152	0.0245410682104631	-0.128631	0.087716995404525	-0.0948628	-0.117836
52	KWMTBOMO00535	CellTypeAll-M5	brown	0.327168042194467	0.24733403522197	0.345753667051886	0.116625297174504	0.182859379927413	0.383451514834472	0.0267850665976716	-0.0881802	0.135220876440804	-0.121125	0.124445540183102	-0.0521864	-0.0546321
53	KWMTBOMO00536	CellTypeAll-M6	yellow	-0.0508804	-0.00371894	-0.0574369	-0.0294194	0.0620798821483057	-0.0200335	0.310470170107113	0.0779879706572885	-0.111525	-0.0722674	-0.0649787	-0.0969795	-0.0259057
54	KWMTBOMO00537	CellTypeAll-M2	turquoise	0.201841479524022	0.131835925056901	0.248146286454824	0.0332004323661687	0.0610077739208428	0.234703269976149	-0.0684552	-0.099254	0.142471491430882	-0.054176	0.10451856946652	-0.00111392	-0.0318121
55	KWMTBOMO00538	CellTypeAll-M3	red	0.083608380015663	-0.167257	-0.0608219	0.461614168650611	0.435542897270635	0.0536112179669889	0.121489391570034	0.339504879136268	-0.236875	0.0447820000958157	-0.295411	-0.042332	-0.207059
56	KWMTBOMO00539	CellTypeAll-M5	brown	0.30515454190217	0.304553161524173	0.394444081769516	-0.0157864	0.0974616493195857	0.425130381467287	0.00903488689064528	-0.219447	0.216375634846799	-0.164575	0.209677261683606	-0.0629915	-0.0271261
57	KWMTBOMO00545	CellTypeAll-M3	red	0.135521501406451	-0.122587	-0.0400722	0.478158444209979	0.372069900076201	0.0654239393252017	0.0616704708275179	0.337770600693469	-0.221406	0.085201105668963	-0.259036	0.0025443591982301	-0.172264
58	KWMTBOMO00568	CellTypeAll-M2	turquoise	0.184103138994301	0.142756755389014	0.210539358515493	0.0383622778811881	0.0385786901253408	0.182253483754861	-0.0754283	-0.0800277	0.144842212778571	-0.000996148	0.130689092597779	0.0425154704871077	0.0372289932977092
59	KWMTBOMO00574	CellTypeAll-M2	turquoise	0.311733828863112	0.161142211858931	0.404951182410192	0.0196130021946927	0.0680835681210659	0.352194792940946	-0.140816	-0.221909	0.310565989253088	-0.0697163	0.19117461359425	0.0381369471273189	-0.0213812
60	KWMTBOMO00576	CellTypeAll-M2	turquoise	0.248474848448414	0.145770124169822	0.329722249782628	0.0356748889067529	0.0763429806710334	0.306957522271838	-0.114023	-0.164971	0.22653130881813	-0.0742565	0.13660360384933	0.00718362799403335	-0.0427573
61	KWMTBOMO00578	CellTypeAll-M2	turquoise	0.271021454212595	0.24455805244477	0.455553877499838	-0.209667	-0.106882	0.383245078804416	-0.128763	-0.402212	0.412795941105876	-0.158588	0.310383120129319	0.00251352519980914	0.0173474068559254
62	KWMTBOMO00584	CellTypeAll-M2	turquoise	0.170034965838989	0.117140831524968	0.182203985989076	0.00895616357990132	0.00961282567972786	0.144837381138231	-0.0429024	-0.0695659	0.131217741357145	0.00909386436310424	0.109732765528091	0.0536431292484273	0.0445018147181034
63	KWMTBOMO00588	CellTypeAll-M2	turquoise	0.18463296511178	0.178755333676684	0.246858095111421	-0.0119248	0.0446049358398567	0.252593103993044	-0.0321013	-0.129866	0.131574935256358	-0.0979762	0.1217043212841	-0.0380545	-0.0374756
64	KWMTBOMO00591	CellTypeAll-M5	brown	0.204531665281839	0.236092779474538	0.234983528930146	0.0375003718002963	0.0734194855897552	0.280704624958564	-0.0215703	-0.0899514	0.0812481451079061	-0.0849833	0.116702247545322	-0.0424247	-0.0261048
65	KWMTBOMO00611	CellTypeAll-M2	turquoise	0.191228757384332	0.146824837771289	0.221045770945971	-0.00270971	0.0260680566612515	0.188677442328695	-0.0345246	-0.0960731	0.137913142402808	-0.0398335	0.118030526454021	0.0108381429489669	0.0059600051671478
66	KWMTBOMO00620	CellTypeAll-M1	greenyellow	0.0573685098074961	0.380440376819297	0.0797798578573498	-0.0884786	-0.0798108	0.260909859727364	-0.0698958	-0.160287	-0.120545	-0.188813	0.175057340797011	-0.175452	-0.110199
67	KWMTBOMO00621	CellTypeAll-M5	brown	0.210295947647158	0.236107153019582	0.213682543855905	0.0515283125924071	0.075857008521945	0.27461908523952	-0.0268462	-0.0777006	0.0499856454285956	-0.0872332	0.11911389286233	-0.050275	-0.034952
68	KWMTBOMO00638	CellTypeAll-M2	turquoise	0.192033761032365	0.181309698095087	0.228434575415006	-0.00747106	0.00509623178933657	0.196349060753237	-0.0534491	-0.106741	0.157239466048959	-0.0201868	0.15125110227181	0.0356232170452377	0.0514575049057682
69	KWMTBOMO00640	CellTypeAll-M5	brown	0.175989565895377	0.184995520476507	0.181877312173028	0.0399130433723902	0.0541619997272785	0.227036890162001	-0.021085	-0.074335	0.0576105920034457	-0.0630747	0.104577035996787	-0.0296187	-0.0255779
70	KWMTBOMO00660	CellTypeAll-M2	turquoise	0.195335297113193	0.207978762699697	0.283251488959279	-0.0771231	-0.018756	0.246918560507712	-0.0571349	-0.187275	0.202734403220961	-0.0835224	0.177666436973181	-0.00482502	0.0298953313991591
71	KWMTBOMO00672	CellTypeAll-M2	turquoise	0.276129900366772	0.170025590597677	0.290661238320848	0.0833492039236069	0.10777280945242	0.2622713014563	-0.0567138	-0.0723041	0.149585440324031	-0.0430092	0.108297441994782	0.0127331857828617	-0.0164722
72	KWMTBOMO00676	CellTypeAll-M2	turquoise	0.179001875372225	0.103134443430102	0.189330704895586	-0.00161591	0.00261953308570242	0.129608862240198	-0.0477838	-0.0722998	0.152765917783557	0.00884158552236855	0.10748479891276	0.0593558240624985	0.0487808391468286
73	KWMTBOMO00678	CellTypeAll-M1	greenyellow	0.227870331542026	0.44334730093209	0.324479246179046	-0.0983935	-0.0358977	0.395660577970254	-0.0842185	-0.249277	0.125518862998778	-0.188976	0.260927884401343	-0.105873	-0.018282
74	KWMTBOMO00687	CellTypeAll-M8	blue	0.300818518848685	0.165598076918041	0.3328730528823	-0.077534	-0.108789	0.162237919583927	-0.18068	-0.21739	0.431944183571424	0.154625672326225	0.311451936685346	0.273045141584434	0.279613816968713
75	KWMTBOMO00688	CellTypeAll-M2	turquoise	0.224263387443144	0.190832350037836	0.260587774714073	0.00203495487955062	0.0108285524922027	0.224293287075042	-0.0777766	-0.120359	0.161629282819022	-0.0393467	0.153942874987802	0.0216988811968893	0.0267322934097332
76	KWMTBOMO00699	CellTypeAll-M6	yellow	-0.0904586	-0.16454	-0.113968	-0.0114987	0.274795371740296	-0.0347804	0.688162385773558	0.130332913016101	-0.17606	-0.174426	-0.22051	-0.197059	-0.148183
77	KWMTBOMO00702	CellTypeAll-M6	yellow	0.0156443778596026	-0.0665663	-0.0112668	0.100212036398532	0.27547420394759	0.0907135413915634	0.339713188287337	0.0871661984204688	-0.119831	-0.132684	-0.146419	-0.147397	-0.161843
78	KWMTBOMO00704	CellTypeAll-M2	turquoise	0.239698850881095	0.248094209391742	0.298753057072209	-0.0440087	0.00673066709216919	0.267678347049606	-0.027723	-0.156357	0.184386742723965	-0.070461	0.186593081730549	0.00586577302520595	0.041390643591367
79	KWMTBOMO00712	CellTypeAll-M5	brown	0.390747731989861	0.420232502034593	0.493310041631523	0.0265842613577505	0.1415566606899	0.575265653208733	-0.062507	-0.265768	0.205439201649327	-0.243513	0.247948996812536	-0.127222	-0.0947578
80	KWMTBOMO00722	CellTypeAll-M2	turquoise	0.246424232749272	0.118087132370941	0.253753987046678	0.0437005437459526	0.0192845635940961	0.172104397934963	-0.0959669	-0.0722516	0.224014481492348	0.0784875500698623	0.152789749849092	0.136386091617028	0.0900147960249162
81	KWMTBOMO00725	CellTypeAll-M8	blue	0.155800433243493	0.0860067953635973	0.181455543521665	-0.0543064	-0.0390956	0.105352969294995	-0.0578302	-0.119097	0.208492925203213	0.0365481049320576	0.145865491150954	0.0991825792897975	0.0879040004428308
82	KWMTBOMO00730	CellTypeAll-M6	yellow	0.134463797698056	0.0546251730619435	0.123798053629889	0.0848719628901936	0.210374556367599	0.173643257530478	0.299898239399137	0.0422902310430806	-0.0051419	-0.0851572	-0.034177	-0.0743643	-0.0752575
83	KWMTBOMO00748	CellTypeAll-M1	greenyellow	0.152858033203859	0.337483224280738	0.19643741007867	-0.0822979	-0.0530561	0.252119062387449	-0.0586707	-0.16349	0.0521029725910294	-0.121042	0.193354630094812	-0.0703418	0.00698399614090766
84	KWMTBOMO00751	CellTypeAll-M4	tan	0.00736774527341165	-0.141439	-0.149796	0.349625601239833	0.392701179476241	-0.00533287	0.2963233138661	0.453358138732294	-0.348287	0.0337781096721517	-0.364875	-0.0984502	-0.223862
85	KWMTBOMO00775	CellTypeAll-M3	red	0.124088190318891	-0.0972819	-0.0122536	0.394848941418455	0.246607802274654	0.0412371976925947	-0.0464429	0.251663235024772	-0.142266	0.0981174210806672	-0.178362	0.0278215477186884	-0.110447
86	KWMTBOMO00782	CellTypeAll-M9	pink	0.0966240879065254	-0.0841412	-0.00664231	0.0787375904050941	-0.0472694	-0.119982	-0.100319	0.119780618837315	0.115809485376019	0.359871095902825	0.0250568756765543	0.31461684676912	0.217821549545113
87	KWMTBOMO00783	CellTypeAll-M11	magenta	0.142515448228723	-0.0341618	0.0644166264809276	0.0692360393304408	-0.0397887	-0.0511896	-0.128545	0.0687163529665248	0.156929902381559	0.272244364868159	0.0651535442185762	0.298518366482277	0.18111696909957
88	KWMTBOMO00786	CellTypeAll-M12	black	0.0878150596339887	0.0548453313591944	0.058711843816502	-0.0301525	-0.099197	-0.0319251	-0.114299	-0.0689151	0.176808479801873	0.208040061728494	0.169800970966854	0.250134711111069	0.267324263195248
89	KWMTBOMO00788	CellTypeAll-M10	purple	0.184478163743465	0.209307304141505	0.25196034938257	-0.0641696	-0.0280968	0.217839216228403	-0.0622829	-0.160333	0.186382881722019	-0.0707035	0.19895319764541	-0.00390477	0.0377024918379947
90	KWMTBOMO00789	CellTypeAll-M9	pink	0.00406151635439245	-0.172419	-0.116084	0.0262971291906979	-0.115764	-0.271817	-0.0633215	0.133604792665621	0.131914725905084	0.481449092055162	0.0397096748398047	0.435165170650898	0.391589629450036
91	KWMTBOMO00791	CellTypeAll-M2	turquoise	0.199910922241294	0.119874982491779	0.215386119257027	0.0361373752936681	0.0394197430513835	0.183116581109878	-0.0591798	-0.0763177	0.138259089115191	-0.00788588	0.108475207631329	0.0427480063954907	0.0187111895363527
92	KWMTBOMO00793	CellTypeAll-M8	blue	0.260554096201026	0.183970035303823	0.336375534961632	-0.0805872	-0.0531443	0.230413595571284	-0.130247	-0.226513	0.342518068480944	0.0194898081324223	0.253835103383037	0.127196971580983	0.116299878483888
93	KWMTBOMO00794	CellTypeAll-M8	blue	0.22457842464161	0.0628841153725988	0.21512120675311	-0.0251446	-0.0807435	0.0659783192599175	-0.166308	-0.152953	0.358227945476116	0.222898241997172	0.248692224718822	0.315183829571443	0.265014783594991
94	KWMTBOMO00833	CellTypeAll-M5	brown	0.271163128564988	0.292939712929091	0.319446825180249	0.0436592854661896	0.0919820580669976	0.39707828403924	-0.0874509	-0.162257	0.110792534966712	-0.148254	0.163089458656524	-0.083583	-0.0858556
95	KWMTBOMO00834	CellTypeAll-M8	blue	0.312479778024417	0.200641373629825	0.423508889911563	-0.246061	-0.205574	0.204808729705098	-0.225244	-0.430332	0.613492447254475	0.0968009961295544	0.460921440302456	0.290665357106244	0.311958273775341
96	KWMTBOMO00837	CellTypeAll-M9	pink	0.110946037853336	-0.116156	-0.0568867	0.231079082581661	0.0157516420697362	-0.141756	-0.135046	0.246422415957637	0.0219497647778179	0.428001101934498	-0.0562489	0.344276362534387	0.196616557591509
97	KWMTBOMO00838	CellTypeAll-M12	black	0.0525765167661907	0.0251276406494744	0.0531604622390823	-0.257282	-0.309919	-0.18305	-0.0570467	-0.221058	0.382289989841602	0.360576747765129	0.355465859327829	0.459708271069745	0.679336054934455
98	KWMTBOMO00839	CellTypeAll-M2	turquoise	0.207221564947781	0.104992025302447	0.212381268961643	0.0042454393034111	-0.0098077	0.126875439247429	-0.0730632	-0.0825981	0.196506026822661	0.0583759855952706	0.134791707284091	0.116965388870319	0.0885002121044142
99	KWMTBOMO00861	CellTypeAll-M11	magenta	0.107838344457414	-0.0143414	0.0409574687908367	0.0279013645555993	-0.0652984	-0.0623443	-0.126816	0.0148546484020929	0.15690333384688	0.25883832825166	0.100226406556283	0.299676949951573	0.212432852510567
100	KWMTBOMO00874	CellTypeAll-M8	blue	0.328753978860088	0.142981332079077	0.383613950933388	-0.00921512	-0.00927044	0.252090235891706	-0.176744	-0.179608	0.377802544759313	0.0599574602883845	0.230264736697295	0.163277849817902	0.0971222581888568
101	KWMTBOMO00883	CellTypeAll-M5	brown	0.365836274731006	0.406118950179142	0.447304175262118	-0.0146971	0.050162079523483	0.501989267205927	-0.0927891	-0.2596	0.212089847848895	-0.188503	0.273195656652118	-0.0824322	-0.0480105
102	KWMTBOMO00886	CellTypeAll-M2	turquoise	0.216892166545138	0.247573778251569	0.291873560538938	-0.0181025	0.0565874975704841	0.329089629807088	-0.0321311	-0.16825	0.136292585553333	-0.139055	0.155213465856337	-0.0702302	-0.0528954
103	KWMTBOMO00889	CellTypeAll-M3	red	0.0681072808669757	-0.0627335	-0.00809388	0.224366096038061	0.199689646619344	0.0346515570011877	0.111818945637398	0.170653397059224	-0.0976258	0.0303690168684343	-0.128711	-0.00167573	-0.0648008
104	KWMTBOMO00902	CellTypeAll-M1	greenyellow	0.186123117680256	0.381154975507339	0.209024893778648	-0.00988268	0.0296058367962033	0.36534336761411	-0.0553798	-0.156101	-0.0385666	-0.191369	0.168066105945053	-0.157376	-0.136685
105	KWMTBOMO00906	CellTypeAll-M2	turquoise	0.219740344079119	0.286390952131372	0.301226577581072	-0.050797	0.00305914620173351	0.326058415135803	-0.0595552	-0.187815	0.151291307794401	-0.132215	0.193571466905951	-0.0609526	-0.0181128
106	KWMTBOMO00910	CellTypeAll-M6	yellow	0.110522089195681	-0.0348912	0.0465269106444099	0.218902118101148	0.315301510564999	0.1371336598847	0.247508325377217	0.137549073402548	-0.0990546	-0.0856884	-0.135263	-0.10237	-0.155811
107	KWMTBOMO00922	CellTypeAll-M10	purple	0.245834610051414	0.447364727788123	0.374125310914202	-0.14392	-0.106532	0.336105439803889	-0.129636	-0.270919	0.226856150695273	-0.1529	0.368604721765097	-0.0413268	0.134534727768188
108	KWMTBOMO00927	CellTypeAll-M2	turquoise	0.32464699747317	0.229134507381353	0.366006404110035	-0.0349321	-0.0324322	0.244940653527517	-0.127142	-0.180819	0.321714476792559	0.0404282079204351	0.257615180000474	0.140762459805491	0.135540214019356
109	KWMTBOMO00938	CellTypeAll-M3	red	0.113331627371242	-0.116942	-0.0731782	0.467881991884526	0.20031984364444	-0.0374707	-0.119887	0.347861340472132	-0.169353	0.237706901692983	-0.200212	0.149228534248603	-0.0208451
110	KWMTBOMO00971	CellTypeAll-M10	purple	0.16444707444658	0.552639294700511	0.258608075906834	-0.222329	-0.231496	0.276857871017165	-0.169736	-0.315128	0.113715274212898	-0.152074	0.438506673354105	-0.0490298	0.207801060621072
111	KWMTBOMO00973	CellTypeAll-M1	greenyellow	0.182012708530794	0.79260245351974	0.324415893958665	-0.315666	-0.316883	0.412837659338857	-0.226842	-0.44186	0.0939973972484028	-0.271716	0.507247566389354	-0.152394	0.166354159861758
112	KWMTBOMO00974	CellTypeAll-M12	black	0.0948158597829455	0.136310783962263	0.128236888294274	-0.28525	-0.321317	-0.086852	-0.0768955	-0.311437	0.412445080667555	0.300340977591332	0.431869108968461	0.428924605387395	0.667534095520183
113	KWMTBOMO00982	CellTypeAll-M5	brown	0.304643825941994	0.240631951162806	0.315277401478128	0.148708476306231	0.153311696996506	0.348834525276226	-0.0659347	-0.0602478	0.118559696098754	-0.0660063	0.122100569995071	-0.0133865	-0.0309616
114	KWMTBOMO00988	CellTypeAll-M5	brown	0.216688593691915	0.180108682650715	0.219934203399243	0.113682197192218	0.206036772356085	0.314510540671708	0.0681239927688805	-0.0242837	0.0111796872709305	-0.129003	0.034197507902666	-0.10489	-0.125522
115	KWMTBOMO00989	CellTypeAll-M5	brown	0.23426446780953	0.141355064199127	0.211547256594186	0.131210769422568	0.182986628991724	0.253082870701736	0.0691019678800933	0.00892230960513492	0.0513508615876343	-0.0311204	0.0463522843328199	-0.00947318	-0.0491515
116	KWMTBOMO00999	CellTypeAll-M12	black	0.117127649592591	0.104213236347353	0.113201559681811	-0.104024	-0.133119	0.0121689385133086	-0.0902597	-0.130414	0.220429502703874	0.148322806312545	0.213792137233403	0.209226363920902	0.242599206625683
117	KWMTBOMO01001	CellTypeAll-M1	greenyellow	0.18770889094921	0.775114195533129	0.34417855624941	-0.364218	-0.352519	0.387976294900556	-0.249468	-0.5108	0.203641368146296	-0.209586	0.565808835281008	-0.0611057	0.271631278022029
118	KWMTBOMO01003	CellTypeAll-M5	brown	0.175655784721744	0.195567621743879	0.19072226965698	0.0526914567236927	0.0870197814632634	0.258525080009756	-0.0318229	-0.0721266	0.0402733727667743	-0.0915009	0.0824857647388154	-0.059312	-0.0618996
119	KWMTBOMO01009	CellTypeAll-M6	yellow	-0.0784392	-0.134414	-0.101905	-0.00599815	0.200493843914442	-0.0235261	0.593244551934824	0.0993865619090941	-0.165951	-0.156309	-0.198329	-0.177788	-0.120912
120	KWMTBOMO01016	CellTypeAll-M3	red	0.0848232637109196	-0.0441178	0.017625080030373	0.202045193819358	0.120599828182366	0.023989343503664	-0.00962273	0.157361136049021	-0.0530252	0.0649759694955963	-0.0924365	0.0312852237229452	-0.0414287
121	KWMTBOMO01018	CellTypeAll-M2	turquoise	0.189983072400026	0.21948903917786	0.227956880829036	9.37527786714209e-05	0.0239936691948271	0.232336773079622	-0.047348	-0.104639	0.107891415318407	-0.0706122	0.136812320275646	-0.019905	0.00900644746596205
122	KWMTBOMO01019	CellTypeAll-M2	turquoise	0.254901745627302	0.209649472220912	0.284950962359464	0.0457692059023449	0.0667505732470639	0.266156143474762	-0.0519681	-0.103404	0.151352440087737	-0.056318	0.142505556721979	0.00487249395157123	0.00743470316041244
123	KWMTBOMO01021	CellTypeAll-M2	turquoise	0.208602530595922	0.119422780680532	0.211594354898192	0.0915212545289248	0.0882976406341761	0.19356117495178	-0.0679807	-0.0346465	0.0983783745474949	-0.0154362	0.0734739012004772	0.0166132443804838	-0.0180935
124	KWMTBOMO01027	CellTypeAll-M4	tan	0.118259332525166	-0.143139	-0.00701925	0.393715495770982	0.46250440818505	0.125208378027663	0.142710684788829	0.241144961907492	-0.187368	-0.0545322	-0.27124	-0.103391	-0.260229
125	KWMTBOMO01032	CellTypeAll-M2	turquoise	0.27937298970239	0.341238401532381	0.418032623551438	-0.122948	-0.0393481	0.41219975230565	-0.104311	-0.303768	0.271340820830273	-0.161812	0.268770049351195	-0.0463432	-0.0099501
126	KWMTBOMO01036	CellTypeAll-M8	blue	0.129979244588903	0.0175267625481603	0.112689534341306	-0.0455733	-0.076502	-0.00283542	-0.1053	-0.102432	0.246492573362869	0.172689730344586	0.16751755379696	0.237168155453824	0.195533062718546
127	KWMTBOMO01049	CellTypeAll-M2	turquoise	0.239768045726087	0.219746507422649	0.276939330721834	0.0126896396462081	0.0485263527325463	0.271389138635547	-0.0492837	-0.120847	0.136874271761311	-0.077887	0.141098490658791	-0.0187452	-0.0129646
128	KWMTBOMO01050	CellTypeAll-M8	blue	0.213356099512217	0.138361771293205	0.27915952092399	-0.128929	-0.0936167	0.156544088222347	-0.0981679	-0.234175	0.351526887969926	0.0413407033329118	0.263050884936284	0.147468667765848	0.151461738965673
129	KWMTBOMO01055	CellTypeAll-M12	black	-0.00532751	-0.0315522	0.00327828264279067	-0.277097	-0.313192	-0.232262	-0.0202445	-0.188096	0.361726303678994	0.362389799523803	0.310718892530045	0.441946134740187	0.651547146076329
130	KWMTBOMO01059	CellTypeAll-M2	turquoise	0.363705124687497	0.285385771451104	0.424875461530727	-0.0362853	-0.0120993	0.320301401541034	-0.137128	-0.2214	0.330613059552706	-0.0353824	0.317225049905277	0.0799044311758714	0.110819185157876
131	KWMTBOMO01061	CellTypeAll-M7	green	0.0500552765638352	-0.133188	-0.0886068	0.195379314231472	0.0368905771735962	-0.140396	-0.0624795	0.272689627078011	-0.0449032	0.299327845347109	-0.113107	0.221221760066488	0.0776200687442662
132	KWMTBOMO01065	CellTypeAll-M1	greenyellow	0.189858311672783	0.279833848160214	0.189745693828455	0.0177665516243165	0.00418942717015222	0.243502892599455	-0.0631662	-0.0954739	0.0388385114391376	-0.0631341	0.149024484330703	-0.0304913	-0.00957479
133	KWMTBOMO01068	CellTypeAll-M12	black	0.0729320260121597	0.0332831040283568	0.0986411299978084	-0.286898	-0.324263	-0.15118	-0.0853798	-0.271349	0.449220481219168	0.342932287360454	0.389700638519835	0.46150610460763	0.660935651275164
134	KWMTBOMO01075	CellTypeAll-M8	blue	0.15598248200186	-0.0383095	0.112496107549689	-0.020788	-0.103882	-0.0560683	-0.19068	-0.102311	0.34876055720163	0.33290008321018	0.225283654653575	0.392711199289619	0.305943358226078
135	KWMTBOMO01076	CellTypeAll-M2	turquoise	0.165611040025824	0.147578609151278	0.209160620702172	-0.0597202	-0.0449942	0.139373894640402	-0.070931	-0.140556	0.20158492288808	0.0106713433412512	0.168959052323029	0.0803382955513619	0.0963944107118646
136	KWMTBOMO01078	CellTypeAll-M5	brown	0.289561178661739	0.218488620669305	0.312364310729196	0.0730877425423248	0.0988515977903978	0.314841331951592	-0.0679746	-0.0938335	0.150853474586816	-0.0668032	0.130209368374244	-0.00612324	-0.0224938
137	KWMTBOMO01086	CellTypeAll-M3	red	0.131112814949644	-0.0377818	0.0734343302488521	0.242093602983039	0.161679145912694	0.0870063767256293	-0.0542135	0.105540599064042	-0.00229829	0.0645372192725615	-0.0616508	0.0518497169620074	-0.0469522
138	KWMTBOMO01088	CellTypeAll-M7	green	0.014747151902474	-0.308514	-0.205129	0.51786400590304	0.43759007590826	-0.136004	0.225464740237342	0.642819543633447	-0.373817	0.171893006466156	-0.479893	-0.0185194	-0.229949
139	KWMTBOMO01095	CellTypeAll-M1	greenyellow	0.240276871192728	0.636284245877196	0.306069033177137	0.00457604088537671	0.0215763793517421	0.480770925275852	-0.162251	-0.213205	-0.0356162	-0.25408	0.233305103694228	-0.197746	-0.0483206
140	KWMTBOMO01131	CellTypeAll-M12	black	0.190191991315662	0.0781027241263528	0.190878396473838	-0.105336	-0.18834	-0.00720958	-0.205393	-0.175734	0.409764339787767	0.322465155617019	0.315835799173281	0.410454688839363	0.454627301656621
141	KWMTBOMO01143	CellTypeAll-M3	red	0.141319667930921	-0.145674	-0.00371785	0.498378597683429	0.419793334321705	0.0906785733754979	0.0100458747368026	0.319247094084946	-0.187855	0.0730847845232908	-0.262913	-0.00687177	-0.202754
142	KWMTBOMO01148	CellTypeAll-M12	black	0.213984558393471	0.133835205402566	0.255282666913492	-0.221567	-0.307046	-0.0145439	-0.26297	-0.33025	0.550352594972068	0.330727870789092	0.455187364662464	0.475726667078671	0.621409246821811
143	KWMTBOMO01150	CellTypeAll-M2	turquoise	0.177794110236558	0.178039922092221	0.22528966198519	0.00247225413509411	0.0372093078768595	0.232484148772078	-0.0505227	-0.111319	0.109437120691262	-0.0813159	0.117552623162887	-0.0296353	-0.0196323
144	KWMTBOMO01155	CellTypeAll-M7	green	0.035312478366839	-0.0723389	-0.0431753	0.123003142004469	0.0994878996842333	-0.0312834	0.0312332767228929	0.185650532217713	-0.0781805	0.08805433154577	-0.119959	0.0482626497323979	-0.0316581
145	KWMTBOMO01162	CellTypeAll-M4	tan	0.11026280601844	-0.103809	0.013438132956429	0.341191948543419	0.463644953014019	0.121439480142467	0.231384947365898	0.24780951615361	-0.179814	-0.052819	-0.228987	-0.10019	-0.202056
146	KWMTBOMO01165	CellTypeAll-M2	turquoise	0.2837814682791	0.41766998729187	0.388606076065802	-0.149298	-0.113343	0.34336853619668	-0.122943	-0.282019	0.252852677769766	-0.118072	0.327179559192549	-0.00580636	0.102050962779376
147	KWMTBOMO01170	CellTypeAll-M9	pink	0.116700700850814	-0.141498	-0.0417272	0.200928047505745	0.00351288511433961	-0.157414	-0.152176	0.256178095813167	0.056192080326326	0.437134186696381	-0.0671896	0.353272290348301	0.191064204423443
148	KWMTBOMO01171	CellTypeAll-M2	turquoise	0.249215193831502	0.211057722488843	0.289896189111172	0.00203695394463414	0.0274481265397271	0.27106851132059	-0.0682508	-0.138424	0.172448040792403	-0.0529239	0.165327809802733	0.0141382326012923	0.00878109131297604
149	KWMTBOMO01173	CellTypeAll-M8	blue	0.133377530287031	0.0985072302449066	0.15368990356481	-0.0876384	-0.0836801	0.0575119729823853	-0.069421	-0.145424	0.238906085591196	0.0876268716161505	0.195666094698474	0.157146919718012	0.173921723279506
150	KWMTBOMO01177	CellTypeAll-M1	greenyellow	0.229959998471988	0.31969815847122	0.265287282021351	0.024667795849297	0.0360458932793731	0.299493409676966	-0.0675524	-0.115806	0.0890930125961627	-0.100836	0.167201700521593	-0.0497849	0.00295152805421321
151	KWMTBOMO01182	CellTypeAll-M7	green	-0.0955044	-0.346034	-0.347244	0.4485078887967	0.125844705695715	-0.392663	-0.201057	0.648651930944699	-0.30054	0.506076762342716	-0.400844	0.281389114403394	0.0462851907506902
152	KWMTBOMO01186	CellTypeAll-M8	blue	0.201977123219397	0.0643895059259427	0.192975853008793	-0.0364815	-0.0772661	0.0607332775985942	-0.126061	-0.0938885	0.282589147472976	0.159901888317609	0.176892739499626	0.223653458396853	0.171485744298456
153	KWMTBOMO01194	CellTypeAll-M2	turquoise	0.271161875409262	0.219377036584012	0.358368969861858	-0.102678	-0.0697752	0.249837599760195	-0.10233	-0.250073	0.353307846819106	0.00509504678426105	0.281702343668969	0.126082139675528	0.13436988091144
154	KWMTBOMO01204	CellTypeAll-M3	red	0.0992740289550537	-0.153988	-0.0796273	0.404879848367261	0.204531369201986	-0.0521126	-0.039398	0.344302965511745	-0.17567	0.185267442437339	-0.232191	0.086353200147198	-0.0770571
155	KWMTBOMO01218	CellTypeAll-M2	turquoise	0.18886290040281	0.106791623087699	0.207355062309183	0.059613181441063	0.0856871768318921	0.192581751503958	-0.0258186	-0.0535914	0.110690323795097	-0.0276679	0.0767146168145383	0.00962471457139105	-0.0197861
156	KWMTBOMO01227	CellTypeAll-M6	yellow	0.0100523883392148	-0.0629358	-0.0191249	0.0894163888965864	0.261866363315286	0.0701981676548411	0.375561516140142	0.114960386274315	-0.124426	-0.116385	-0.134443	-0.134704	-0.118434
157	KWMTBOMO01232	CellTypeAll-M6	yellow	0.0733650556087553	0.0476106203972204	0.0513990741746722	0.0261787783042626	0.108040993828937	0.104578534903908	0.170501572900013	-0.00276664	-0.0209009	-0.061087	0.00987244145232972	-0.0535039	-0.0410236
158	KWMTBOMO01241	CellTypeAll-M5	brown	0.10606109576957	0.147111955920368	0.127641201477065	0.0342815351809502	0.101956053977077	0.210999112397384	0.0236615975440051	-0.0551145	-0.000177631	-0.106563	0.0380034441663381	-0.0852839	-0.0838457
159	KWMTBOMO01252	CellTypeAll-M4	tan	0.179101971051407	-0.0517716	0.0388472283669567	0.499844706538422	0.526097308178312	0.200539285434487	0.0983119254375037	0.298393321065045	-0.236919	-0.0301749	-0.257111	-0.0982521	-0.256084
160	KWMTBOMO01265	CellTypeAll-M3	red	0.166471660104155	-0.0949038	0.0584725750994376	0.428684198656828	0.409929699213665	0.159798858530899	0.0578279927432073	0.237297872776532	-0.13909	-0.0196227	-0.203211	-0.062826	-0.194585
161	KWMTBOMO01266	CellTypeAll-M3	red	0.166812331478118	-0.14988	0.0105689108917904	0.527019471592298	0.459265449683521	0.11762885409615	0.0542807018973757	0.343244646118651	-0.202395	0.037515559738076	-0.282722	-0.0397864	-0.213482
162	KWMTBOMO01273	CellTypeAll-M12	black	-0.015574	-0.0654682	-0.0428209	-0.197264	-0.295847	-0.274973	-0.0826392	-0.123948	0.322894428081007	0.438444485346242	0.275518953985042	0.490818191493979	0.654885245987527
163	KWMTBOMO01278	CellTypeAll-M6	yellow	-0.0635531	-0.085336	-0.106645	0.0210763664628857	0.122565242235047	-0.0559586	0.434925361612425	0.142451961617077	-0.157596	-0.0497184	-0.138115	-0.090511	-0.0256344
164	KWMTBOMO01287	CellTypeAll-M5	brown	0.205257052110593	0.373302942978265	0.284589338633959	-0.109821	-0.076927	0.343687727407729	-0.0872243	-0.230317	0.121294750502851	-0.147421	0.23499827559159	-0.0723816	-0.0113513
165	KWMTBOMO01301	CellTypeAll-M3	red	0.205255988036236	0.00779533275489716	0.135722921124428	0.3255092996502	0.274231449801808	0.209600139198711	-0.0510889	0.101841435112752	-0.0443035	-0.0307134	-0.0839333	-0.0406548	-0.143039
166	KWMTBOMO01312	CellTypeAll-M9	pink	0.0915199925558519	-0.0957729	-0.0574942	0.20938023425121	0.0240868539637171	-0.111243	-0.0930673	0.209881087451885	-0.00107736	0.346104408146355	-0.0498807	0.267771462302556	0.139252345323982
167	KWMTBOMO01315	CellTypeAll-M3	red	0.143090145063618	-0.0956534	-0.0145972	0.337895	0.20451322719782	-0.00196279	0.0051566620344165	0.281612662483649	-0.102973	0.18970621085411	-0.177917	0.119967984697234	-0.0355856
168	KWMTBOMO01318	CellTypeAll-M2	turquoise	0.276518579783578	0.141533179767505	0.293434894570772	0.0923778215929489	0.0921014209688853	0.245088966151593	-0.0920409	-0.0704414	0.174476000277278	-0.00291254	0.110058572713137	0.056837791544176	0.000587770853881351
169	KWMTBOMO01320	CellTypeAll-M12	black	0.121988627483553	0.16280007037565	0.17199474188073	-0.345257	-0.369677	-0.0688373	-0.0990778	-0.373732	0.488013560360506	0.296988709455178	0.493788277096644	0.450160125570683	0.709336017404254
170	KWMTBOMO01331	CellTypeAll-M2	turquoise	0.185157189321973	0.0929022193275059	0.1928630153465	0.0187657908111887	0.022074010712635	0.131012402400963	-0.0379973	-0.0633274	0.160576579244431	0.0319377982683678	0.108945093395575	0.0805119228045688	0.0557744467286319
171	KWMTBOMO01332	CellTypeAll-M2	turquoise	0.199150316304632	0.157480825135053	0.230597315399688	0.00431988168673878	0.0263381760059926	0.194767729420504	-0.0471146	-0.0959187	0.146350209092589	-0.0398415	0.121051962983973	0.0172894478742958	0.0201121534826093
172	KWMTBOMO01341	CellTypeAll-M5	brown	0.376858144505388	0.349701567567643	0.452028787924231	0.0939271972865569	0.249303759801833	0.557159758862331	0.0594559284088096	-0.195685	0.14529005535172	-0.275066	0.164324952522885	-0.169706	-0.156706
173	KWMTBOMO01349	CellTypeAll-M6	yellow	0.129299405444125	0.00926490225688745	0.105188513839665	0.146183990199259	0.224611345242981	0.149679007435059	0.128080850472583	0.0641653985844835	-0.0235065	-0.0720174	-0.0607329	-0.06383	-0.0915013
174	KWMTBOMO01353	CellTypeAll-M2	turquoise	0.234902207516199	0.132049068498714	0.269469836682795	0.00596621204820691	0.0257001439643575	0.193913301977285	-0.0744604	-0.12854	0.224968686962226	0.00671642728708735	0.165567087259857	0.0802887701538003	0.0567135908078582
175	KWMTBOMO01370	CellTypeAll-M9	pink	0.0967571783637072	-0.104532	-0.019243	0.166520256960096	0.0148378472779763	-0.104035	-0.120475	0.177549011338841	0.0610346141890251	0.331925909269641	-0.0318426	0.269102641626921	0.124952563835111
176	KWMTBOMO01371	CellTypeAll-M6	yellow	-0.10699	-0.127488	-0.126201	-0.0552185	0.168229319203736	-0.0617925	0.603740910728343	0.110402757353606	-0.163496	-0.145307	-0.18913	-0.170355	-0.0834207
177	KWMTBOMO01375	CellTypeAll-M6	yellow	-0.0116877	-0.184774	-0.133547	0.239581671015066	0.279339796990289	-0.0659456	0.339564386462689	0.335380322927398	-0.226508	0.0489929031695906	-0.281706	-0.0421913	-0.123113
178	KWMTBOMO01379	CellTypeAll-M7	green	0.0946627801023853	-0.0871458	-0.0215789	0.200075109619704	0.0580972787189668	-0.071066	-0.118807	0.228847655406791	-0.00618458	0.250133823975051	-0.0879368	0.183594082647664	0.035148761233217
179	KWMTBOMO01381	CellTypeAll-M12	black	0.0257773333684948	0.0743084867414877	0.0600462889007079	-0.34	-0.333797	-0.152169	0.000564758176355256	-0.293743	0.379884089355518	0.275564598586385	0.389576868080233	0.395990246580591	0.658491580789561
180	KWMTBOMO01384	CellTypeAll-M2	turquoise	0.243079854366371	0.198683525057882	0.33111454176839	-0.0385563	0.00685798811687713	0.280778909028817	-0.0912245	-0.197151	0.244117223746398	-0.0856524	0.213661262889311	0.00644493247898757	0.0131911151615351
181	KWMTBOMO01387	CellTypeAll-M2	turquoise	0.201180190368521	0.114155329740859	0.200184395405613	0.0073034740966643	0.0206421942131105	0.135579032283571	-0.0237029	-0.0540482	0.160251538928786	0.0230884741090271	0.112938850941636	0.0699296809176268	0.0592439176226657
182	KWMTBOMO01400	CellTypeAll-M2	turquoise	0.209149543382359	0.119181571303298	0.224748042512161	0.00940020300674615	0.00867604294160746	0.157636246023275	-0.0725799	-0.0952624	0.189958507615196	0.0316990106614528	0.142610035507619	0.089974303913936	0.0675386569019836
183	KWMTBOMO01406	CellTypeAll-M11	magenta	0.0761949897620294	-0.0171147	0.0355871027306266	-0.0168833	-0.0768176	-0.0581964	-0.0974498	-0.0225585	0.153985168066459	0.199127394996532	0.103274122692057	0.251874625634668	0.186693155131329
184	KWMTBOMO01407	CellTypeAll-M2	turquoise	0.263135536330379	0.127555399282749	0.263386310694755	0.0390868567286394	0.0203488020254496	0.183527995893218	-0.0857469	-0.0832862	0.222455873123661	0.0588289387575304	0.156634663913997	0.122489758216749	0.0861884754321135
185	KWMTBOMO01420	CellTypeAll-M9	pink	0.0139570382171337	-0.144604	-0.118161	0.0930134100176614	-0.0318697	-0.209109	0.021408868775299	0.229176594752528	0.00521727567017864	0.377874845476157	-0.0694294	0.288650357652678	0.204613640823144
186	KWMTBOMO01424	CellTypeAll-M12	black	0.10828704012769	0.0412238215244816	0.0631009030368822	-0.09769	-0.266483	-0.152396	-0.247945	-0.138335	0.358851019487625	0.451282889818871	0.332171667067213	0.509760529528269	0.622751341860324
187	KWMTBOMO01433	CellTypeAll-M8	blue	0.302521441170836	0.178252404686596	0.328653736639876	-0.0479882	-0.0380877	0.219777016445559	-0.111465	-0.167429	0.312384167803488	0.0311287821141833	0.219142440243619	0.126294663271684	0.106397034339668
188	KWMTBOMO01440	CellTypeAll-M2	turquoise	0.229510952684949	0.199506912332605	0.255398125612032	0.0271488035621014	0.0452810747896641	0.24560712636904	-0.0528098	-0.10053	0.12822166069316	-0.0507113	0.138042296573051	0.00330750237171319	0.00676444838758842
189	KWMTBOMO01446	CellTypeAll-M2	turquoise	0.258902120349629	0.202010194331678	0.346635366668002	-0.0754807	-0.0301771	0.255803325591125	-0.0941043	-0.20883	0.290566939841904	-0.0364167	0.221319969529879	0.0651170991749017	0.0727941797744963
190	KWMTBOMO01476	CellTypeAll-M7	green	0.0490465267560677	-0.0612926	-0.0327421	0.131251860738893	0.042404367006537	-0.0634576	-0.0501153	0.177921285000948	-0.028462	0.17526091403869	-0.0829849	0.128916403501709	0.0334429845142484
191	KWMTBOMO01491	CellTypeAll-M9	pink	0.0346831646758686	-0.105431	-0.0763012	0.163561130817246	0.0249396955493949	-0.119333	-0.072745	0.208862034966138	-0.0304719	0.275575345905462	-0.0904486	0.195702366569224	0.077467508236417
192	KWMTBOMO01518	CellTypeAll-M5	brown	0.31624194855921	0.308430958349308	0.370599628359859	0.0318989892886212	0.0643216100205673	0.383916097804002	-0.0843965	-0.168367	0.184575644750522	-0.11556	0.197548592191275	-0.0327146	-0.00693939
193	KWMTBOMO01519	CellTypeAll-M6	yellow	0.0326928651858589	0.13222858701628	-0.0219255	0.0626131475071744	0.172532488453141	0.163867673440744	0.238533731027642	0.0477473967977004	-0.214133	-0.166166	-0.0537928	-0.197917	-0.167745
194	KWMTBOMO01523	CellTypeAll-M3	red	0.1790334084146	-0.140014	-0.00207846	0.491401573590166	0.289517109778388	0.0316050796518508	-0.0700615	0.335951409287753	-0.158424	0.160875062542883	-0.230762	0.0890544639744609	-0.0908191
195	KWMTBOMO01532	CellTypeAll-M8	blue	0.223179054267507	0.0896037652134204	0.23179631588783	-0.0140251	-0.00915827	0.135826201715739	-0.0738366	-0.109398	0.257777337091376	0.0687028562970901	0.168520949020204	0.136266918097363	0.0993434000318315
196	KWMTBOMO01533	CellTypeAll-M2	turquoise	0.268588048811428	0.272138753706732	0.373741977426732	-0.0200366	0.0579290452046111	0.382548299563392	-0.0728015	-0.209612	0.209747673312398	-0.14759	0.182000781839176	-0.0518323	-0.0430593
197	KWMTBOMO01536	CellTypeAll-M6	yellow	-0.0269183	-0.180245	-0.1362	0.285622731049358	0.388219798752671	-0.0361518	0.281421713564544	0.306082845595253	-0.238685	0.0139802093270215	-0.289154	-0.0841606	-0.196596
198	KWMTBOMO01537	CellTypeAll-M9	pink	-0.0793296	-0.338509	-0.160592	0.0569100974401918	-0.138016	-0.345276	-0.393155	0.117733008368091	0.18900029573179	0.471706882342699	-0.0451418	0.391533510705447	0.172414761585074
199	KWMTBOMO01538	CellTypeAll-M7	green	-0.189623	-0.351728	-0.379574	0.320225311156168	0.090273986503852	-0.384251	-0.144482	0.605489837245504	-0.361082	0.363889954852601	-0.471443	0.10896734902353	-0.161873
200	KWMTBOMO01541	CellTypeAll-M7	green	0.0135214689610669	-0.159393	-0.087104	0.130079382560727	-0.0177713	-0.170568	-0.152208	0.247007883419749	0.013340147650531	0.301017587013823	-0.131041	0.205133161662984	0.0488312547507383
201	KWMTBOMO01542	CellTypeAll-M7	green	-0.224206	-0.595891	-0.438178	0.40721406294658	0.140401187740752	-0.511025	-0.233897	0.608221789266457	-0.241706	0.461304523220585	-0.48932	0.236808007201012	-0.074137
202	KWMTBOMO01545	CellTypeAll-M8	blue	0.141625427533228	0.0931854466851016	0.227172668004272	-0.241498	-0.20585	0.0813696337431377	-0.165311	-0.39098	0.475969496196822	0.072507577259559	0.42365455852486	0.20665269307969	0.262560273122238
203	KWMTBOMO01563	CellTypeAll-M5	brown	0.217177488002204	0.203686130813507	0.264016527573556	0.0192426939448252	0.0766665983774406	0.301212502737975	-0.0252895	-0.127878	0.120085484829874	-0.115195	0.121495694114251	-0.0527507	-0.0460547
204	KWMTBOMO01579	CellTypeAll-M2	turquoise	0.271576894002498	0.324435223694812	0.371799342244119	-0.0664035	-0.0106753	0.354773079663408	-0.0884782	-0.219833	0.224075470361783	-0.120244	0.239501962977123	-0.0249328	0.0277335470184644
205	KWMTBOMO01591	CellTypeAll-M1	greenyellow	0.205331214119424	0.74316665831728	0.324013346833091	-0.251333	-0.238193	0.423335050717865	-0.163853	-0.354873	0.0604680274621057	-0.253711	0.424800980110232	-0.159236	0.103209924595035
206	KWMTBOMO01592	CellTypeAll-M1	greenyellow	0.208770707383979	0.799027578060295	0.353999950585813	-0.287896	-0.274076	0.452017810257643	-0.204436	-0.413255	0.0897342181442362	-0.283461	0.475906947935987	-0.169513	0.126092199875179
207	KWMTBOMO01606	CellTypeAll-M8	blue	0.23319670445935	0.0859050109115034	0.269795670866462	-0.160676	-0.184779	0.0655836204835397	-0.220066	-0.24804	0.487601149750093	0.206712527923871	0.333360710568657	0.323455570357846	0.290285391068077
208	KWMTBOMO01607	CellTypeAll-M7	green	-0.174486	-0.402732	-0.334427	0.130436281486497	0.0404969560579636	-0.41103	0.18823448172047	0.403416228171357	-0.111906	0.367332238727246	-0.249861	0.228929881837256	0.138235829823584
209	KWMTBOMO01621	CellTypeAll-M12	black	0.0558350715219316	-0.0180523	-0.0240944	-0.0188384	-0.0531657	-0.0977752	0.0851650947816643	0.0454686570163377	0.0813290542874169	0.224401199299659	0.0805953155561851	0.219753182205414	0.258154776716061
210	KWMTBOMO01637	CellTypeAll-M5	brown	0.273523366139294	0.239848118715801	0.268969764234706	0.0861421903278436	0.0773951663798121	0.311526013934941	-0.0797644	-0.0976529	0.102218094275682	-0.0499666	0.149971302790931	-0.00328931	-0.0232946
211	KWMTBOMO01646	CellTypeAll-M8	blue	0.0872301758327118	0.0141084150837777	0.083813108958257	-0.0919687	-0.113182	-0.0271084	-0.107628	-0.126305	0.250763717378895	0.171841000117522	0.184850006562566	0.231844661010933	0.210101412890102
212	KWMTBOMO01656	CellTypeAll-M7	green	0.120585509180037	-0.197061	-0.081479	0.539843077830227	0.321793593670731	-0.0180529	-0.0677149	0.423463085415073	-0.22392	0.201586497911734	-0.297987	0.095087378334894	-0.113996
213	KWMTBOMO01659	CellTypeAll-M2	turquoise	0.189106115495679	0.159339002535975	0.238907576765243	-3.05e-05	0.0294253471168139	0.215757708197682	-0.0620389	-0.113273	0.146690953977582	-0.0599078	0.126208812823479	-0.00331022	-0.00110902
214	KWMTBOMO01660	CellTypeAll-M8	blue	0.260540060467835	0.170489796069276	0.362395964957797	-0.200158	-0.153938	0.202061609747256	-0.162509	-0.370132	0.478766496186505	0.0384997591854593	0.389990958859593	0.19018703172126	0.204037323882036
215	KWMTBOMO01662	CellTypeAll-M5	brown	0.224003085901006	0.228770990761509	0.242993913660364	0.0366858353507165	0.072529014703851	0.294491103375444	-0.0386585	-0.102402	0.0818437326960735	-0.0948331	0.125883334676515	-0.0484807	-0.0392166
216	KWMTBOMO01684	CellTypeAll-M8	blue	0.217190039545607	0.110971656651813	0.228263126719691	-0.00715377	-0.0101609	0.144654380640284	-0.080026	-0.09604	0.227222941037658	0.0584797957343167	0.151131133621961	0.119824867730478	0.0879282714416133
217	KWMTBOMO01688	CellTypeAll-M9	pink	0.0500253798974033	-0.130933	-0.078797	0.113608407802844	-0.0296338	-0.195337	-0.00435818	0.205123160107521	0.0609999472670831	0.390014725024849	-0.0152873	0.315500305905325	0.240391464506366
218	KWMTBOMO01694	CellTypeAll-M7	green	-0.0919643	-0.191288	-0.199412	0.113417345012094	0.0680937939155931	-0.191018	0.0661697256737224	0.352343002036323	-0.195161	0.142615667180146	-0.266511	0.0119219052250143	-0.0937209
219	KWMTBOMO01707	CellTypeAll-M5	brown	0.227652339986183	0.19578356538532	0.217644558605071	0.0810532979372694	0.100490491515234	0.27080088273631	-0.0277683	-0.0650267	0.052286212354124	-0.0795921	0.0922284878999353	-0.045688	-0.0549342
220	KWMTBOMO01708	CellTypeAll-M5	brown	0.220889905138425	0.222063136965012	0.258895985624599	0.0294094177136489	0.0816213460325079	0.298092970587091	-0.0431877	-0.118185	0.112389312823532	-0.0980958	0.126111379731432	-0.0422589	-0.030988
221	KWMTBOMO01709	CellTypeAll-M5	brown	0.169666200275955	0.113065925952147	0.150275005136633	0.14150929536265	0.165986165746769	0.235254191001141	-0.00327768	-0.00138134	-0.00733047	-0.0861743	0.00738070535672897	-0.072719	-0.109064
222	KWMTBOMO01718	CellTypeAll-M5	brown	0.297230939350354	0.183412982777976	0.298831680347302	0.169757343440834	0.225079626377296	0.368619532984347	-0.0065879	-0.0378223	0.0745637517260005	-0.102827	0.0494851436550366	-0.0578452	-0.117714
223	KWMTBOMO01720	CellTypeAll-M8	blue	0.2340396707302	0.104458921058888	0.277175228678645	-0.184036	-0.184067	0.0813733813664863	-0.179753	-0.278626	0.485753757307804	0.18123207154692	0.346624573834247	0.313277610286019	0.298336652978384
224	KWMTBOMO01743	CellTypeAll-M8	blue	0.174348291222943	0.102400938676361	0.221400731538751	-0.0866116	-0.0653629	0.126349884982608	-0.0909645	-0.181064	0.287279750961759	0.0566235731281268	0.211397944055199	0.138278529394923	0.129002069854809
225	KWMTBOMO01751	CellTypeAll-M5	brown	0.200905189791638	0.184799412239344	0.211124411451555	0.123214417079251	0.185103466190111	0.308588648845789	0.0169858889684272	-0.038437	0.0148895007721128	-0.134726	0.0318023805031297	-0.0995292	-0.107206
226	KWMTBOMO01757	CellTypeAll-M11	magenta	0.0869013914694161	-0.0961629	-0.0263353	0.0362665387997961	-0.129169	-0.19696	-0.115151	0.0705973978209644	0.204620007925163	0.449157206070834	0.128149074737961	0.474611942566412	0.432184766842003
227	KWMTBOMO01784	CellTypeAll-M2	turquoise	0.254538268840933	0.193851415881834	0.291295517631567	0.120115298000258	0.140116656585402	0.322636972614567	-0.0880382	-0.0797945	0.118113259027278	-0.0763329	0.0929332127638979	-0.0272917	-0.0639005
228	KWMTBOMO01785	CellTypeAll-M5	brown	0.18897884714865	0.227470792364895	0.219522046058343	0.0368836508127324	0.113339392759493	0.336177862310275	0.0296391755156923	-0.114203	0.0307713601957082	-0.167877	0.0948343815176825	-0.121264	-0.111198
229	KWMTBOMO01788	CellTypeAll-M2	turquoise	0.305507969829037	0.151521135372498	0.313479705628797	0.0345682283217587	0.0415466724827767	0.230743370268558	-0.0809327	-0.0916481	0.221803335670334	0.00176455560811621	0.148408747554649	0.0753772073295187	0.0346662456341437
230	KWMTBOMO01794	CellTypeAll-M3	red	0.147927201559291	-0.0761999	0.0150849742096044	0.314429086565269	0.204389504940899	0.0270314404652875	0.042442179496452	0.248275038053601	-0.0861019	0.134567157308185	-0.13482	0.0795512101870272	-0.0275067
231	KWMTBOMO01796	CellTypeAll-M11	magenta	0.0518020106035324	-0.123065	-0.0380293	0.0245577776345802	-0.0891973	-0.16983	-0.121494	0.07842830198282	0.16653620101124	0.361912788546842	0.0638948991788719	0.373048719545045	0.233921065152928
232	KWMTBOMO01799	CellTypeAll-M9	pink	0.108297053579781	-0.0828942	-0.0288543	0.20016019368566	0.0250869811565238	-0.0911275	-0.105619	0.188985224495275	0.0290002311845951	0.325590360397595	-0.0322402	0.257425913572345	0.130289257133283
233	KWMTBOMO01802	CellTypeAll-M6	yellow	-0.0386344	-0.0554605	0.00451346557136125	-0.220718	-0.0238739	-0.07062	0.414500001443832	-0.129912	0.161997908010464	-0.00478733	0.145885106882055	0.0548770280936466	0.198791524429039
234	KWMTBOMO01804	CellTypeAll-M7	green	0.146670011674906	-0.113338	-0.00627032	0.308745305703154	0.12680355682365	-0.0554858	-0.105722	0.27201441254912	-0.00559278	0.305898095415736	-0.0969708	0.2331722065531	0.0560553626484694
235	KWMTBOMO01806	CellTypeAll-M2	turquoise	0.188273878543686	0.0784805728761737	0.174527988803714	0.0110803777311384	0.0252790674594335	0.10223301473799	0.0732582776077814	-0.0338797	0.172537487418838	0.0654723964061788	0.119482146692131	0.104079168527456	0.103509814808853
236	KWMTBOMO01817	CellTypeAll-M2	turquoise	0.300420503671834	0.206706031312524	0.324016423885634	0.0843611280816566	0.106311179659208	0.311678057704117	-0.0701367	-0.107511	0.168129866420217	-0.0570224	0.141785377314943	0.00919823991818704	-0.0164112
237	KWMTBOMO01820	CellTypeAll-M2	turquoise	0.21450166297932	0.136117650052483	0.247471760924967	0.0359959033979029	0.0537676048206159	0.211464876061966	-0.070516	-0.0846371	0.159532656036047	-0.0215751	0.11556418623029	0.0289038058811025	0.000234226368909017
238	KWMTBOMO01821	CellTypeAll-M5	brown	0.231376244209279	0.191484532023967	0.244300590866141	0.152462590511578	0.180436068752108	0.329000553370965	-0.0628464	-0.0511643	0.0525332602007033	-0.104298	0.0659870825157451	-0.0713743	-0.0974446
239	KWMTBOMO01826	CellTypeAll-M11	magenta	0.0654239920102464	-0.0304155	0.0311250240262604	-0.0181671	-0.0691619	-0.0559714	-0.0915679	-0.0257702	0.155467079532548	0.188594903765977	0.0991238678656642	0.230377244787602	0.161188396341324
240	KWMTBOMO01829	CellTypeAll-M6	yellow	-0.23399	-0.251416	-0.243099	-0.0792556	0.237194831653866	-0.159136	0.841760675447726	0.230584559016442	-0.288077	-0.19773	-0.346666	-0.260289	-0.181526
241	KWMTBOMO01834	CellTypeAll-M7	green	-0.0149367	-0.379465	-0.295746	0.622937654634411	0.326717430752366	-0.253168	-0.138909	0.75172648446963	-0.429681	0.356593143145205	-0.570902	0.109493192478155	-0.233237
242	KWMTBOMO01838	CellTypeAll-M4	tan	0.0572498620453337	-0.0790143	-0.0216997	0.192707743694316	0.264541237943053	0.0340355549571392	0.1920688700137	0.19835239100684	-0.12709	-0.00315708	-0.15421	-0.0475645	-0.0986276
243	KWMTBOMO01844	CellTypeAll-M6	yellow	0.00723895755970356	0.00205602581961635	-0.0827912	0.131447101442184	0.240649253366168	0.0344973693307379	0.516630313434231	0.26061598823627	-0.26893	-0.100912	-0.183113	-0.166274	-0.111395
244	KWMTBOMO01851	CellTypeAll-M5	brown	0.239542948361641	0.186695318565608	0.235762366448115	0.0995817982256653	0.119671042388537	0.29287856815294	-0.0321819	-0.0621214	0.0693999952148375	-0.0766124	0.0824738022409767	-0.0398665	-0.0692611
245	KWMTBOMO01855	CellTypeAll-M5	brown	0.228124845622842	0.21769146559657	0.24313007343534	0.122970934198195	0.133614521429615	0.335990201188788	-0.0789124	-0.073301	0.0461486567767343	-0.119848	0.089815388005116	-0.0820668	-0.102466
246	KWMTBOMO01862	CellTypeAll-M5	brown	0.277779332365945	0.365133292149272	0.344022030276538	0.0147679543090522	0.122237856646421	0.455913122986855	0.0262553835759843	-0.17829	0.0900256055588655	-0.213423	0.175027400997017	-0.136551	-0.0879208
247	KWMTBOMO01866	CellTypeAll-M4	tan	0.199015586207437	0.01928152039729	0.137527348683165	0.254550686887711	0.341980623747584	0.236175162667361	0.060951136236385	0.0766257797332834	-0.0545367	-0.0875488	-0.0880765	-0.086866	-0.178229
248	KWMTBOMO01876	CellTypeAll-M2	turquoise	0.309682567605728	0.1910337859988	0.374517947121887	0.00201770342777727	0.0317745009079089	0.299305190135742	-0.101801	-0.175402	0.28401678609615	-0.0309913	0.199857	0.0653062319474132	0.0345787687345377
249	KWMTBOMO01877	CellTypeAll-M8	blue	0.301521492502573	0.108679636127667	0.294078374603519	0.0479693623700718	0.0220891846654765	0.18703018290357	-0.111691	-0.0874066	0.271153772135534	0.0902340603997764	0.155027178037487	0.164320682659327	0.0914247052013055
250	KWMTBOMO01883	CellTypeAll-M10	purple	0.262714687883275	0.224416083082086	0.281754742950507	0.0130840123856216	0.0199790910548945	0.237392485603348	-0.0737243	-0.112224	0.180781475324805	-0.0165954	0.182167416228984	0.051226912558469	0.0610862204768712
251	KWMTBOMO01884	CellTypeAll-M6	yellow	-0.204805	-0.17887	-0.173403	-0.156675	0.204772147170314	-0.0910078	0.865415203255709	0.0916409225313826	-0.218164	-0.272485	-0.237781	-0.288709	-0.143866
252	KWMTBOMO01894	CellTypeAll-M2	turquoise	0.495825355603434	0.353475485593409	0.53920783439019	0.0899303098262329	0.197414178323768	0.524649089162871	-0.0166857	-0.213304	0.267921139346199	-0.204445	0.221674388934829	-0.0702349	-0.0656134
253	KWMTBOMO01897	CellTypeAll-M2	turquoise	0.2395915199402	0.220798852445037	0.288182811523205	-0.0399252	-0.0125374	0.23574955786071	-0.0630926	-0.15393	0.207273101305544	-0.0353604	0.184552938565804	0.0421846257521493	0.0700312698399674
254	KWMTBOMO01908	CellTypeAll-M3	red	0.226300872607028	-0.082748	0.0537182176390539	0.600533867819226	0.401079758505885	0.131433523913008	-0.136761	0.357619081220527	-0.173045	0.128099589651828	-0.238513	0.0518528836628846	-0.159462
255	KWMTBOMO01910	CellTypeAll-M7	green	0.0185718835367119	-0.111383	-0.0793201	0.200416007857103	0.144914424579328	-0.0637637	0.0595291466186982	0.238726884830558	-0.119622	0.113751782191731	-0.162864	0.0416564556362207	-0.0578198
256	KWMTBOMO01914	CellTypeAll-M2	turquoise	0.463830598230647	0.296814911414741	0.473232836337897	0.0429954126153418	0.0826123208616662	0.396415882702478	-0.0573861	-0.184318	0.30662042563313	-0.0567096	0.249782169152412	0.0642097666253956	0.0590475477194638
257	KWMTBOMO01915	CellTypeAll-M7	green	0.0354050996916303	-0.0588211	-0.0422357	0.101125938768372	0.0118401443785495	-0.0735611	-0.06009	0.156564822476886	-0.0243554	0.165132785125422	-0.0669498	0.120140695033646	0.0406043817453186
258	KWMTBOMO01917	CellTypeAll-M2	turquoise	0.218252607710475	0.167333235770116	0.233573390808648	0.0119153557077736	-0.000803572	0.174698946889645	-0.0800029	-0.0932722	0.178136966272317	0.017689844666686	0.150341259556896	0.0733444423995132	0.0665128163176209
259	KWMTBOMO01918	CellTypeAll-M12	black	0.168157598797935	0.212118020281678	0.183919412405128	-0.210064	-0.267135	-0.00376163	-0.137539	-0.2808	0.40825783678628	0.260566125351012	0.441107049724848	0.388421872667828	0.556816272943069
260	KWMTBOMO01922	CellTypeAll-M6	yellow	-0.0918033	-0.243278	-0.188111	0.269447713019674	0.482903801510833	-0.0493738	0.61775321712289	0.371277616154425	-0.345211	-0.106526	-0.384769	-0.205072	-0.252174
261	KWMTBOMO01923	CellTypeAll-M6	yellow	-0.231007	-0.193666	-0.218042	-0.109405	0.214534083298674	-0.137786	0.86229991608815	0.174598177036349	-0.259015	-0.228386	-0.250817	-0.272622	-0.120097
262	KWMTBOMO01924	CellTypeAll-M6	yellow	-0.236679	-0.204452	-0.220032	-0.139205	0.231204659034059	-0.124685	0.883486449361763	0.147807315790071	-0.257973	-0.270053	-0.271385	-0.306644	-0.174249
263	KWMTBOMO01926	CellTypeAll-M9	pink	0.0826872401691407	-0.0644207	-0.0173713	0.0678612967003473	-0.0681156	-0.12409	-0.123613	0.093530279640237	0.11500295409954	0.349060237938472	0.0444811621003871	0.328612036786764	0.240073751464368
264	KWMTBOMO01927	CellTypeAll-M10	purple	0.161344222692326	0.261374862132812	0.222744520379516	-0.240174	-0.173152	0.0952628282451286	0.0688108649024913	-0.275851	0.34017075104206	0.0753757382531504	0.403009857794699	0.191244472688425	0.371629038500997
265	KWMTBOMO01932	CellTypeAll-M7	green	0.0319712283064732	-0.0701873	-0.0503803	0.104625270912209	0.0161791039019975	-0.0800051	-0.0258042	0.151864599957464	-0.0251756	0.180581962512214	-0.0662626	0.139510775590769	0.0673599075790827
266	KWMTBOMO01941	CellTypeAll-M12	black	-0.0208408	0.0123007636128722	-0.00631792	-0.331916	-0.329703	-0.230288	0.0373936193577797	-0.19265	0.320299465210945	0.303019071975773	0.310403066380861	0.386936306428907	0.629953773404027
267	KWMTBOMO01945	CellTypeAll-M2	turquoise	0.192680975746039	0.129340795943392	0.229486200412429	0.0224471497785199	0.0480228286906998	0.205567367020427	-0.055803	-0.0912126	0.142900071605558	-0.0388433	0.108563093379882	0.00879446599488145	-0.00538881
268	KWMTBOMO01947	CellTypeAll-M2	turquoise	0.315202586244684	0.218299737962876	0.303480248772095	0.0375743150061831	0.0248003430700549	0.229929784091345	-0.0430708	-0.0938013	0.22759763385709	0.0412528269610791	0.203366622414599	0.11539230321924	0.122324774143512
269	KWMTBOMO01948	CellTypeAll-M5	brown	0.359372273615941	0.180432255478796	0.359518225953365	0.226822772275234	0.261956560082643	0.405809660296256	-0.00222548	-0.0583153	0.135455059332711	-0.0903326	0.0878579672812411	-0.0251847	-0.10305
270	KWMTBOMO01956	CellTypeAll-M2	turquoise	0.31338293615765	0.117945184334809	0.28561957554676	0.114460642403481	0.0746230477336466	0.203492787743978	-0.113269	-0.0615813	0.220950814193057	0.0815781036561565	0.136401625786271	0.144948245397395	0.0697433263545297
271	KWMTBOMO01958	CellTypeAll-M8	blue	0.308358430566894	0.195167524984103	0.324281892268875	-0.0404588	-0.0437818	0.199318984818448	-0.105417	-0.158832	0.312604650229883	0.0418209302679376	0.227957269912864	0.138514340382403	0.137811309571955
272	KWMTBOMO01966	CellTypeAll-M8	blue	0.238518078448076	0.114309101690159	0.260500320334289	-0.0600157	-0.0576898	0.13791926261589	-0.0938215	-0.149103	0.306434359306381	0.0765031244462353	0.199417227352155	0.163903700884956	0.130422059813783
273	KWMTBOMO01971	CellTypeAll-M7	green	0.0893635685291103	-0.0207223	-0.0179568	0.124492828307081	0.0218437902611561	-0.0525585	0.0202768563058699	0.160307419664817	-0.014804	0.186825104980849	-0.0290271	0.144291927395296	0.0955140393915464
274	KWMTBOMO01988	CellTypeAll-M3	red	0.139819743844463	-0.149205	-0.00981859	0.503935312178869	0.440313876128674	0.106837861102313	-0.0159589	0.308778950739191	-0.209066	0.0378035762861535	-0.281205	-0.0421337	-0.236854
275	KWMTBOMO01991	CellTypeAll-M2	turquoise	0.269912462867649	0.223220791492354	0.30424817533583	0.0212089676463784	0.0564438368556524	0.278805976459685	-0.0503236	-0.119264	0.174011319447777	-0.0487083	0.158074981627733	0.0167712791811355	0.019283716899899
276	KWMTBOMO01993	CellTypeAll-M5	brown	0.229939364681115	0.248648652531961	0.293264660068366	0.0142922134320724	0.11261905276001	0.365073172689599	0.00739699437904862	-0.146396	0.107761114179394	-0.162747	0.129065764762509	-0.0944218	-0.0808027
277	KWMTBOMO01997	CellTypeAll-M2	turquoise	0.195457033727768	0.320814207136456	0.284322729905722	-0.119301	-0.0293973	0.327333305366759	-0.00636263	-0.221932	0.136585497575792	-0.154902	0.205000804266167	-0.0759772	-0.015435
278	KWMTBOMO02006	CellTypeAll-M12	black	0.228281927294862	0.107912105319227	0.266190748627221	-0.168386	-0.267275	-0.00139304	-0.269478	-0.310818	0.555229988635908	0.342643190186641	0.437650254076789	0.489732514160441	0.624965455458856
279	KWMTBOMO02025	CellTypeAll-M9	pink	0.0667493188095807	-0.0876182	-0.0609419	0.160539118105885	0.0157375275475378	-0.111726	-0.0545162	0.192792867927721	-0.00256178	0.305112445149674	-0.0506525	0.23496022272761	0.140447282867221
280	KWMTBOMO02035	CellTypeAll-M12	black	0.0315744489616134	-0.0261531	-0.0433163	0.00195185531634107	-0.0781592	-0.111206	-0.0212345	0.040181514123852	0.0744083194868072	0.24185706374729	0.0812128139566263	0.231522348989443	0.234995244856319
281	KWMTBOMO02041	CellTypeAll-M6	yellow	-0.132188	-0.128747	-0.121672	-0.106252	0.212930250298496	-0.0302066	0.733196184328104	0.0637789777100039	-0.172542	-0.235339	-0.190963	-0.242351	-0.14149
282	KWMTBOMO02048	CellTypeAll-M8	blue	0.264080481702829	0.154595884448115	0.320196570852259	-0.0415566	-0.0120897	0.220071209049234	-0.0986062	-0.175417	0.295877105788767	-0.000670676	0.20402591241862	0.0954970983186707	0.0745475187178796
283	KWMTBOMO02059	CellTypeAll-M12	black	-0.0221823	-0.0313526	-0.0205773	-0.277884	-0.314797	-0.250696	0.0020741019644545	-0.165991	0.337042711675633	0.364381159629041	0.305647770566258	0.435938656154044	0.657592423328637
284	KWMTBOMO02060	CellTypeAll-M8	blue	0.239742218136837	0.112097685625141	0.266481891153207	0.00573546538203482	0.00757796078998944	0.173982389951725	-0.107086	-0.128546	0.260694485238357	0.0445622213238807	0.18535181638576	0.118201380855166	0.0860108384667135
285	KWMTBOMO02061	CellTypeAll-M8	blue	0.140633107289212	0.0109500767743827	0.144848657381668	-0.15072	-0.221162	-0.0690933	-0.253596	-0.231675	0.468827034664016	0.344637885869218	0.348987016792317	0.443152359182015	0.420086309413171
286	KWMTBOMO02064	CellTypeAll-M3	red	0.0997899943025733	-0.121014	-0.0558725	0.340206813273571	0.167918348020556	-0.0520945	-0.0280092	0.288303051360136	-0.106325	0.227216569744164	-0.171705	0.15143566202958	-0.00867353
287	KWMTBOMO02076	CellTypeAll-M9	pink	0.0272130594811556	-0.0925056	-0.0604393	0.126502622774715	0.0277254677736487	-0.0914845	-0.0384984	0.153256775323166	-0.01848	0.214529884727811	-0.070226	0.158681764713076	0.0685985380042505
288	KWMTBOMO02077	CellTypeAll-M2	turquoise	0.226769668152244	0.144124401595029	0.320825743046883	-0.0911585	-0.0433013	0.242218196224033	-0.0811983	-0.21912	0.282463795365817	-0.0607391	0.201375478321801	0.039115311272668	0.0194172039176679
289	KWMTBOMO02078	CellTypeAll-M1	greenyellow	0.171757579123992	0.262289693100698	0.19651722534185	-0.028361	-0.00281021	0.2176113014655	-0.0315361	-0.115118	0.0807842816768502	-0.0753182	0.147452730388909	-0.0288853	0.0147628626192166
290	KWMTBOMO02081	CellTypeAll-M9	pink	0.0177984442498824	-0.270501	-0.141726	0.159079858877442	-0.0251122	-0.304429	-0.0630569	0.270573086285774	0.080919559295606	0.522149116700853	-0.0664044	0.425594561369203	0.339864285709828
291	KWMTBOMO02082	CellTypeAll-M10	purple	0.294329792308882	0.305381692472618	0.302982103620546	-0.0096895	-0.0431822	0.259018983923425	-0.147288	-0.154886	0.201723434026818	0.0297409566990831	0.26719412628388	0.104304807686784	0.131036325652044
292	KWMTBOMO02088	CellTypeAll-M11	magenta	0.210578270829767	0.0066078231690726	0.174008309634449	-0.0242504	-0.128402	-0.0212992	-0.223063	-0.102043	0.385474093267338	0.334862291489722	0.253894121126056	0.426660059597675	0.311425254758527
293	KWMTBOMO02095	CellTypeAll-M3	red	0.13510455667126	-0.0563023	0.0442598093015335	0.270549348936839	0.168649485355595	0.0562906676897017	0.000984912232656643	0.150432483220788	-0.0337584	0.0781214342378379	-0.0877508	0.0488624847296332	-0.0484216
294	KWMTBOMO02096	CellTypeAll-M2	turquoise	0.21286322047587	0.343107144580525	0.335406873917173	-0.21761	-0.129803	0.261216057415435	-0.0091956	-0.301758	0.305895118788325	-0.0794747	0.332552949867766	0.0407111657579097	0.180517004541167
295	KWMTBOMO02097	CellTypeAll-M8	blue	0.192797581852566	0.0979239938866122	0.202681475280624	-0.0842738	-0.103282	0.0739416612115754	-0.104827	-0.127185	0.28867491938933	0.126075794334762	0.194575134049621	0.199505004281812	0.181194257208106
296	KWMTBOMO02108	CellTypeAll-M7	green	0.0888671249273173	-0.150424	-0.0999533	0.405479251159023	0.292272950603173	-0.0684735	0.0608530866961384	0.488768208569016	-0.231017	0.211005981783874	-0.319501	0.0631878955024505	-0.132803
297	KWMTBOMO02113	CellTypeAll-M2	turquoise	0.235235488750887	0.292763952984588	0.33042301676946	-0.107115	-0.0611835	0.310326549477229	-0.0876651	-0.235565	0.222190816828902	-0.105053	0.234411961724166	-0.00991453	0.0319094609138862
298	KWMTBOMO02114	CellTypeAll-M2	turquoise	0.291268263861334	0.336258387168471	0.390886014428516	-0.131074	-0.0947911	0.346713389313188	-0.135076	-0.304027	0.306154678708056	-0.073689	0.323400942923619	0.0463393304159631	0.0847993670264613
299	KWMTBOMO02115	CellTypeAll-M11	magenta	0.15665351850022	0.0044210411761111	0.0781920780601209	-0.00261635	-0.109099	-0.0798319	-0.128844	-0.00603927	0.237316418811147	0.331216413558467	0.156461775063095	0.409694555628267	0.343867143332776
300	KWMTBOMO02123	CellTypeAll-M8	blue	0.184698401698281	0.0843803495652174	0.18301439815033	0.013158644246258	-0.0109501	0.102665697460615	-0.0887093	-0.0782546	0.204539227905388	0.0878413382141104	0.14003533813454	0.140617936603419	0.105695430074721
301	KWMTBOMO02133	CellTypeAll-M11	magenta	0.108058890487291	-0.0774041	0.0552437968970828	-0.096684	-0.208368	-0.163271	-0.246246	-0.105839	0.38078270175217	0.433307834572825	0.246880691837276	0.528459101564177	0.427067738395314
302	KWMTBOMO02135	CellTypeAll-M2	turquoise	0.276848414485824	0.272630728138826	0.343739517054785	-0.112838	-0.0711033	0.27031888983484	-0.0648842	-0.232373	0.286513027708559	-0.0243384	0.274301822448983	0.082029945204586	0.122308031059307
303	KWMTBOMO02140	CellTypeAll-M11	magenta	0.135444673573104	-0.0351023	0.0666091266272102	0.0209094597961302	-0.0574582	-0.0583285	-0.073797	0.0232938886458654	0.195529930485886	0.267247396011294	0.10355351910478	0.306435616810683	0.210515694313107
304	KWMTBOMO02148	CellTypeAll-M9	pink	0.106178942157763	-0.142228	-0.0747156	0.246124591775596	0.00551284215047376	-0.177849	-0.183613	0.250047493388895	0.0461971828231207	0.491642848141814	-0.0397133	0.401028504181748	0.243880825105703
305	KWMTBOMO02150	CellTypeAll-M8	blue	0.282539565328309	0.141485025793707	0.319646072016633	-0.0197479	-0.00789144	0.200027008746571	-0.102449	-0.149542	0.294989671357111	0.0212033996715318	0.184435837710163	0.112900739181235	0.0718248809096655
306	KWMTBOMO02151	CellTypeAll-M2	turquoise	0.374710175994462	0.264409655254895	0.403780046085136	-0.00509671	0.0376462957437112	0.343757777810767	-0.048231	-0.18761	0.27717772403812	-0.053273	0.240254294258977	0.0547589826364864	0.0531857378785993
307	KWMTBOMO02152	CellTypeAll-M5	brown	0.182983759714948	0.274256988114596	0.205214867300423	0.00679774005865524	0.0575058469091702	0.297143544040982	-0.0102466	-0.113506	0.02496818436329	-0.121373	0.128221045852722	-0.0833722	-0.0491454
308	KWMTBOMO02165	CellTypeAll-M5	brown	0.38198470179442	0.31391299687322	0.430333582754963	0.0444610304959019	0.103211057244885	0.436879743384717	-0.055849	-0.181719	0.214732518533001	-0.134114	0.204499145130166	-0.0337911	-0.029809
309	KWMTBOMO02171	CellTypeAll-M2	turquoise	0.331874345971595	0.1274028438123	0.328374567775145	0.0857273175716099	0.0809050694277085	0.243092065176001	-0.0967579	-0.0855403	0.246447300798408	0.0340424577527569	0.147183890925654	0.111563473690244	0.0472652044521816
310	KWMTBOMO02185	CellTypeAll-M9	pink	0.0678375164049812	-0.112614	-0.0681259	0.148183788919009	-0.014573	-0.142301	-0.100866	0.19249071677411	0.0264249100839782	0.357476986357614	-0.0399762	0.284898664490071	0.16596491102417
311	KWMTBOMO02193	CellTypeAll-M8	blue	0.200281227668044	0.100191574009126	0.288943848848112	-0.149448	-0.100343	0.178620702247942	-0.105547	-0.282217	0.368761597352897	0.000986126321737311	0.276406840537305	0.113054926392087	0.0900959185299071
312	KWMTBOMO02194	CellTypeAll-M6	yellow	-0.112555	-0.133575	-0.152177	0.0034905569890415	0.0956572510678455	-0.116153	0.330205993320127	0.211032807876917	-0.163797	-0.0272573	-0.18836	-0.100445	-0.0859868
313	KWMTBOMO02210	CellTypeAll-M2	turquoise	0.24690353958219	0.152473134773339	0.256009146673027	-0.0041089	0.0288823913804528	0.210414472416816	-0.00756348	-0.113081	0.185308503804983	-0.0200594	0.141244354497104	0.0475584104010244	0.0376465791084857
314	KWMTBOMO02211	CellTypeAll-M5	brown	0.20031203259691	0.216884387066405	0.211795633012815	0.0524053959264482	0.0666011788995468	0.258571233789495	-0.0465242	-0.0788074	0.0630446044188066	-0.0690699	0.111227656875774	-0.0298357	-0.0275409
315	KWMTBOMO02223	CellTypeAll-M7	green	0.0784805771751855	-0.173251	-0.112545	0.369446435697453	0.121963510877382	-0.154346	-0.165915	0.42912372312725	-0.126844	0.380690741750542	-0.228277	0.245991684935159	0.0225934054229126
316	KWMTBOMO02230	CellTypeAll-M2	turquoise	0.291764676424453	0.191968640322574	0.282742561888374	0.033374860914471	0.0274614587275995	0.20721646357717	-0.0687089	-0.0780987	0.197842776101954	0.0299602561728013	0.160794783409221	0.0949273311292985	0.0832175358291668
317	KWMTBOMO02240	CellTypeAll-M2	turquoise	0.243509474349912	0.168842365142339	0.297223670921599	0.000577622395900657	0.052900236393532	0.256798519855064	-0.0263074	-0.129519	0.197206033636514	-0.0635495	0.147746996695703	0.00916535324191479	0.00544239777376968
318	KWMTBOMO02241	CellTypeAll-M12	black	0.166706870796558	0.070138606954997	0.12712509509478	-0.0693762	-0.157157	-0.0382442	-0.0800686	-0.132815	0.329109419364512	0.29302964813179	0.308154270316896	0.362049809632307	0.429851738855504
319	KWMTBOMO02242	CellTypeAll-M3	red	0.157262180366664	-0.0295779	0.0783956360830944	0.307889675940492	0.260063762210243	0.131382390940839	0.0134892865736067	0.148969374657748	-0.0615045	0.0181415402384535	-0.111861	-0.00688738	-0.112823
320	KWMTBOMO02251	CellTypeAll-M2	turquoise	0.23048704483433	0.161376410238083	0.316565771670313	-0.0438808	-0.00822905	0.256385805741093	-0.119953	-0.21956	0.283813709856769	-0.0504991	0.221143738852977	0.0426680844112016	0.0510957990844589
321	KWMTBOMO02253	CellTypeAll-M3	red	0.139644339661923	-0.160176	-0.0114992	0.589520048324936	0.495137407462707	0.136355143598585	-0.0635624	0.336504514015998	-0.253121	0.00746649016124333	-0.306424	-0.0750523	-0.280521
322	KWMTBOMO02269	CellTypeAll-M9	pink	0.0770423292456272	-0.0652561	-0.0353782	0.131561566862787	0.000553785335871262	-0.102364	-0.0743682	0.164499625348668	0.0343715662456201	0.311316437194821	-0.0259178	0.250123195536211	0.158667083359383
323	KWMTBOMO02274	CellTypeAll-M8	blue	0.199371736316465	0.0632041690454674	0.174852260076031	0.00745244037897815	-0.0263105	0.0711956625260216	-0.0796103	-0.0529118	0.212653027352092	0.125328679997974	0.125955263168988	0.176785552365432	0.135618230122294
324	KWMTBOMO02276	CellTypeAll-M5	brown	0.269316624073897	0.206508811157322	0.301974183235487	0.0789149116407208	0.130551886876142	0.345372099739255	-0.0566467	-0.113785	0.126382432631964	-0.111804	0.112386355462829	-0.0503691	-0.0769664
325	KWMTBOMO02277	CellTypeAll-M2	turquoise	0.186447334930306	0.158953557660734	0.219169860990518	-0.00981226	0.0274182111315513	0.19752670104123	-0.0166711	-0.100603	0.133284827893597	-0.0537975	0.120225022639462	0.00114188994842387	0.0134179206562062
326	KWMTBOMO02278	CellTypeAll-M12	black	0.118981931500276	0.0912411747851728	0.0865329185647485	-0.14148	-0.238862	-0.0850071	-0.0996089	-0.228926	0.34190538612806	0.355767986590454	0.385811698069823	0.458142533330307	0.645026180241337
327	KWMTBOMO02294	CellTypeAll-M2	turquoise	0.182472120052303	0.138802655354333	0.219216158677975	0.0109640140355139	0.0390907685753239	0.190594546916923	-0.0427439	-0.0894919	0.136618335854071	-0.0333757	0.109546383906256	0.0133222941160374	0.0109525458680403
328	KWMTBOMO02318	CellTypeAll-M3	red	0.0999131075178675	-0.0587797	0.0431147897850175	0.290655298953047	0.299050816279705	0.143731073595455	0.0262184201442655	0.134132156143403	-0.109413	-0.0555961	-0.142497	-0.0791202	-0.177685
329	KWMTBOMO02320	CellTypeAll-M8	blue	0.165020115058949	0.0601965274798474	0.154519633700901	-0.0157973	-0.0478327	0.0576915448349638	-0.0949851	-0.0683578	0.208477961438343	0.122478624938886	0.133218143085527	0.176705593010145	0.133629803275343
330	KWMTBOMO02329	CellTypeAll-M2	turquoise	0.266766296674389	0.163650297227751	0.27993768085032	0.0212548427857629	0.0281918255451187	0.212368023791055	-0.0616022	-0.11284	0.219960691909956	0.028658870906956	0.174095569979068	0.103083168172914	0.0857651376614317
331	KWMTBOMO02352	CellTypeAll-M10	purple	0.0969431580143244	0.215238460249585	0.0880468286990095	-0.148699	-0.164697	0.0163185351305682	0.0192276027490364	-0.122586	0.147034081628316	0.137070204588977	0.266147684465824	0.200791096963739	0.35889714118984
332	KWMTBOMO02361	CellTypeAll-M3	red	0.105821664194512	-0.024349	-0.0176112	0.21426289113031	0.0289231730264344	-0.029202	-0.116958	0.160141128029631	-0.0412381	0.2055936058856	-0.0293937	0.174064089359389	0.10183770809104
333	KWMTBOMO02389	CellTypeAll-M2	turquoise	0.283278315899515	0.175436247214666	0.368931874156074	-0.0507474	0.0344829082653764	0.316292389497203	-0.0391846	-0.214831	0.278081872270622	-0.099	0.176749731812682	0.00853000055871035	-0.0208975
334	KWMTBOMO02407	CellTypeAll-M6	yellow	0.0156645540631414	0.0128777847634825	0.0252705217113794	0.00743148729772401	0.131309029951032	0.0744955945867806	0.191450253056457	0.0273432819006828	-0.031484	-0.0945064	-0.0428762	-0.0929005	-0.0810829
335	KWMTBOMO02422	CellTypeAll-M9	pink	0.0518218373018735	-0.0694475	-0.0290349	0.0327894150300883	-0.0730602	-0.121768	-0.103885	0.0634787853526258	0.109747040779751	0.306497556396878	0.0486505895829585	0.287389393469559	0.215870686331749
336	KWMTBOMO02430	CellTypeAll-M8	blue	0.195873246774556	0.0562258797849606	0.188913974875565	-0.0315074	-0.076469	0.0597426081922722	-0.129912	-0.0895242	0.27514699167017	0.165274622358423	0.170793390129242	0.222618108945879	0.163288978426718
337	KWMTBOMO02431	CellTypeAll-M11	magenta	0.034548578589542	-0.0885694	-0.0722861	-0.00795495	-0.145105	-0.221113	-0.0832581	0.0769084002846481	0.148084925134243	0.427499625653129	0.0960575607953737	0.452426194578128	0.413761242864164
338	KWMTBOMO02433	CellTypeAll-M2	turquoise	0.258207128365298	0.194699723342184	0.323932202557814	-0.0331411	-0.0279593	0.225026038663281	-0.128553	-0.171672	0.279198122293142	0.0211832779607441	0.207086455043766	0.112605910798334	0.0922431410577021
339	KWMTBOMO02439	CellTypeAll-M2	turquoise	0.173330805566199	0.113412066964236	0.188033663197166	0.0220135369425292	0.0297124599759712	0.159571354082809	-0.0441342	-0.0689915	0.11799640112772	-0.0163319	0.097186370204385	0.0248568929090373	0.0147279779726588
340	KWMTBOMO02441	CellTypeAll-M1	greenyellow	0.193156233591846	0.358938188306701	0.2431260477954	-0.0806409	-0.0609539	0.273247145287729	-0.0777347	-0.175867	0.0987308956453808	-0.107071	0.217057804927123	-0.0498436	0.0254185727292278
341	KWMTBOMO02443	CellTypeAll-M8	blue	0.113888005244816	0.0492525269023337	0.121483598244292	-0.0959975	-0.103033	0.0145014525319083	-0.0846515	-0.138067	0.248608199684189	0.129050240988334	0.191656315493173	0.196871671429554	0.191767673984069
342	KWMTBOMO02445	CellTypeAll-M9	pink	0.103314231444387	-0.0391163	0.0229027527916023	0.0508568393082486	-0.052749	-0.0808955	-0.101543	0.0703986263273155	0.129462168157365	0.294641140550568	0.0561789222298033	0.27863948250712	0.202666790276793
343	KWMTBOMO02450	CellTypeAll-M9	pink	0.0462950976323475	-0.105702	-0.0487317	0.101944415953441	-0.0141119	-0.121148	-0.0878459	0.133470985224553	0.049576099548343	0.290246647076043	-0.0234892	0.241058678902308	0.138647183940592
344	KWMTBOMO02451	CellTypeAll-M1	greenyellow	0.243568220457942	0.444315954484141	0.323196850076949	-0.0779621	-0.0212287	0.396620005622429	-0.0843314	-0.235274	0.120891532553047	-0.182583	0.253344302172043	-0.103851	-0.0160137
345	KWMTBOMO02460	CellTypeAll-M8	blue	-0.0163387	-0.0592751	0.0101219449831787	-0.215814	-0.183308	-0.120029	-0.127662	-0.307572	0.339224077808303	0.157851507698257	0.32418282558591	0.258084581735904	0.310117112770405
346	KWMTBOMO02470	CellTypeAll-M9	pink	0.104515782806766	-0.108755	-0.0105336	0.143086636112904	-0.0580351	-0.163794	-0.238913	0.0868692814627079	0.209797011409262	0.480483781910784	0.111884889887149	0.442209346582696	0.311095080703791
347	KWMTBOMO02471	CellTypeAll-M2	turquoise	0.240343007213352	0.121095659522193	0.245377999295763	0.0576604677118582	0.047624112188843	0.187954161901289	-0.0629348	-0.0671104	0.181528297759688	0.0264893210783475	0.128644983768402	0.0805985580855749	0.0482549865798903
348	KWMTBOMO02475	CellTypeAll-M2	turquoise	0.2274184624685	0.205298775715341	0.262597656381848	-0.0261132	0.00136271314140313	0.224845628081211	-0.0513484	-0.136005	0.172331303904365	-0.0491184	0.17967435183425	0.0184227759759602	0.0423548982120554
349	KWMTBOMO02477	CellTypeAll-M12	black	-0.00892987	-0.0365762	-0.0206163	-0.222321	-0.290777	-0.242392	-0.0428651	-0.137156	0.316422858078682	0.382578283045361	0.28043024060854	0.442917093701223	0.639089116151293
350	KWMTBOMO02490	CellTypeAll-M12	black	0.141421415127851	0.0497556021274052	0.0430141049768102	0.0163450248640239	-0.168623	-0.126618	-0.23086	0.0257724251289503	0.215420457418551	0.442243115885115	0.195080983276809	0.455692704324792	0.454188615039207
351	KWMTBOMO02500	CellTypeAll-M9	pink	0.0183525810972071	-0.183572	-0.123876	0.172251236478081	0.0139576158311413	-0.216096	-0.0416802	0.239380476946185	0.0204543579208956	0.432404244328543	-0.0687643	0.334702134539855	0.209147744611649
352	KWMTBOMO02516	CellTypeAll-M5	brown	0.284710592538018	0.30348100185921	0.355138785415094	0.0288649346743824	0.098184833913406	0.447107756528727	-0.0841358	-0.19482	0.136101598036904	-0.184059	0.17757357711392	-0.106415	-0.119849
353	KWMTBOMO02518	CellTypeAll-M6	yellow	-0.143852	-0.142848	-0.123344	-0.121093	0.230014787411149	-0.0217878	0.774582983144782	0.0591044136279901	-0.184794	-0.27366	-0.220248	-0.276726	-0.176882
354	KWMTBOMO02519	CellTypeAll-M6	yellow	0.0111101986369367	-0.0250103	0.0146921793754012	-0.0631992	0.137776315638904	0.0895269633751897	0.333545847034453	-0.0664169	-0.0259228	-0.160573	-0.0757723	-0.127616	-0.121856
355	KWMTBOMO02528	CellTypeAll-M2	turquoise	0.177140233784618	0.103003947923372	0.208470736408531	-0.00804101	0.0014556065022229	0.144891153975325	-0.0726038	-0.107081	0.186645673199757	0.0182758853217621	0.13180646662974	0.0759627499175736	0.0561778369037184
356	KWMTBOMO02529	CellTypeAll-M12	black	0.11512677221653	0.0244127491154305	0.0635319553569882	-0.0137105	-0.103985	-0.0469915	-0.137254	-0.0480208	0.203743666956797	0.25704429608749	0.169306134583988	0.298567096641239	0.279385610796896
357	KWMTBOMO02549	CellTypeAll-M2	turquoise	0.302464147659815	0.447160969797925	0.486768262508955	-0.217796	-0.113056	0.468228351331961	-0.107181	-0.396384	0.332187270922098	-0.206772	0.370406903077242	-0.0586886	0.0378347187991258
358	KWMTBOMO02561	CellTypeAll-M2	turquoise	0.195132870157506	0.131558624389549	0.216376085550333	-0.00350908	-0.0141629	0.142956026201713	-0.0854853	-0.101737	0.199007887490519	0.0397393442493265	0.15580915213655	0.0987499915896602	0.0881408943366311
359	KWMTBOMO02562	CellTypeAll-M1	greenyellow	0.233283901819604	0.282372794592904	0.249076927935475	0.0244665311433791	0.0333090980380711	0.265342409707102	-0.0608162	-0.10751	0.105343042474606	-0.0709205	0.156262630646613	-0.0211621	0.0118710801564765
360	KWMTBOMO02563	CellTypeAll-M1	greenyellow	0.228000959474706	0.665561300796974	0.302072059072894	-0.165014	-0.17484	0.394283934322372	-0.170926	-0.289911	0.0584562495816528	-0.193215	0.354540835520968	-0.113545	0.0901794473330798
361	KWMTBOMO02579	CellTypeAll-M3	red	0.067334722124308	-0.156862	-0.114605	0.410928942681064	0.289772844707895	-0.0618152	0.115619113217484	0.381456683866237	-0.203596	0.225324457411208	-0.234146	0.116256608943812	-0.0593232
362	KWMTBOMO02581	CellTypeAll-M3	red	0.18252870368801	-0.0571647	0.07399722467939	0.411994188610319	0.388903157224223	0.178197788072014	0.0296532755357419	0.214499319767694	-0.140326	-0.0156808	-0.186729	-0.0574597	-0.201518
363	KWMTBOMO02596	CellTypeAll-M6	yellow	-0.140949	-0.120305	-0.130848	-0.0968228	0.108754980846714	-0.0877032	0.586572127460034	0.087721143069682	-0.160087	-0.12894	-0.157514	-0.1606	-0.03388
364	KWMTBOMO02599	CellTypeAll-M10	purple	0.131840947308162	0.302572900376884	0.205392176394361	-0.315096	-0.308478	0.0846734878636298	-0.221842	-0.452854	0.399748194319361	0.095113535238076	0.566491456425359	0.249031440675928	0.436569820990191
365	KWMTBOMO02615	CellTypeAll-M2	turquoise	0.282712361206357	0.224853078663471	0.360055827324449	-0.0453199	-0.0126183	0.281345195772221	-0.0981216	-0.19064	0.266410865883473	-0.0554769	0.207670589800446	0.0399909037912935	0.0403623678296162
366	KWMTBOMO02621	CellTypeAll-M3	red	0.214550313306652	-0.117481	0.0465646148586823	0.627982071364099	0.448451155649406	0.16734329439331	-0.140904	0.35012242763166	-0.204268	0.0781168417821517	-0.272587	-0.000170351	-0.241696
367	KWMTBOMO02625	CellTypeAll-M5	brown	0.17406747975214	0.212350203115063	0.192718166747685	0.01230325976589	0.0351982714363653	0.235898581333643	-0.0339888	-0.0966443	0.0678929839625109	-0.0806006	0.11993541325625	-0.0428042	-0.0209896
368	KWMTBOMO02626	CellTypeAll-M1	greenyellow	0.295406462778476	0.355193407275502	0.331157395318494	-0.0165975	0.0151319685115912	0.34805861108381	-0.0632963	-0.187166	0.162341149830725	-0.107121	0.231869478983108	-0.0291421	0.014076459373752
369	KWMTBOMO02628	CellTypeAll-M8	blue	0.364996769060327	0.213282329159605	0.412654198493682	-0.000837421	-0.0120897	0.274480964539302	-0.17113	-0.196578	0.393159132934654	0.0634615765867403	0.274695792563788	0.180257466735759	0.144062869613903
370	KWMTBOMO02630	CellTypeAll-M7	green	0.0553140672209594	-0.24475	-0.163699	0.388413620756253	0.107425768423533	-0.225992	-0.185099	0.393570412408595	-0.0785353	0.502362634828703	-0.189228	0.392721053595547	0.14794317894327
371	KWMTBOMO02633	CellTypeAll-M9	pink	0.0614958028358755	-0.0951792	-0.03614	0.13348657334408	0.00249547815964971	-0.103157	-0.0984288	0.155237220633072	0.040592146811085	0.279675304502373	-0.0334245	0.216085896898768	0.0972117471614805
372	KWMTBOMO02636	CellTypeAll-M6	yellow	0.0231694092295754	0.0334993074973056	0.0214806343872314	0.0484136076904292	0.322542020167202	0.175587388541086	0.588010858592211	0.11010348495339	-0.199519	-0.301705	-0.15788	-0.313192	-0.241595
373	KWMTBOMO02637	CellTypeAll-M8	blue	0.144350693748238	0.0293822376639868	0.1265003732748	-0.0782537	-0.115666	-0.00656369	-0.114615	-0.121878	0.286622978780377	0.204445087692396	0.208030604542648	0.271055869527761	0.23460770304882
374	KWMTBOMO02645	CellTypeAll-M5	brown	0.186605246629162	0.212102778370141	0.214153728252021	0.0184738993548266	0.0473366380198808	0.255718929253434	-0.0383408	-0.0967183	0.0765187447173502	-0.0860546	0.116446922388285	-0.0442447	-0.0292186
375	KWMTBOMO02647	CellTypeAll-M8	blue	0.292368045913296	0.198737760164221	0.349614834701042	-0.111548	-0.0948574	0.196294369908146	-0.130125	-0.224356	0.387393569791189	0.0478900573565428	0.28063891278665	0.166743225718782	0.172055539563486
376	KWMTBOMO02659	CellTypeAll-M2	turquoise	0.261716148441547	0.195914207560493	0.324938800768144	0.00998888609005739	0.062964788010608	0.299878429736288	-0.0452529	-0.149973	0.19939546477957	-0.0848425	0.155241363114268	-0.00491099	-0.0182522
377	KWMTBOMO02687	CellTypeAll-M2	turquoise	0.188091635216692	0.190650878691645	0.242130154513218	-0.0392566	0.00590190637674119	0.223185237760038	-0.0298514	-0.134039	0.145320053460778	-0.0735279	0.152709904027178	-0.0112896	0.00636687767467473
378	KWMTBOMO02688	CellTypeAll-M2	turquoise	0.200083779156613	0.187425298485844	0.24452815282475	-0.0462988	-0.00352955	0.2115967503771	-0.014587	-0.131858	0.155416101667507	-0.0613925	0.160203013166208	0.00211075117938058	0.0157202996771299
379	KWMTBOMO02712	CellTypeAll-M3	red	0.098827416117122	-0.23437	-0.0730842	0.642547811739355	0.585060431890141	0.104987052655343	0.0506052468222058	0.432595388398668	-0.336605	-0.0136084	-0.410142	-0.120618	-0.342564
380	KWMTBOMO02718	CellTypeAll-M7	green	0.0502328023028056	-0.0561882	-0.0597836	0.122300129657102	0.012098013825173	-0.0926111	-0.024252	0.203553691601931	-0.0490129	0.218081799549357	-0.0770641	0.15525152751624	0.079721135339716
381	KWMTBOMO02721	CellTypeAll-M6	yellow	-0.0533998	-0.0675643	-0.0511816	-0.0718512	0.110833259653129	-0.0035999	0.448624459942993	0.0194307013562009	-0.0790155	-0.127356	-0.0998195	-0.125744	-0.0652104
382	KWMTBOMO02722	CellTypeAll-M7	green	0.0617683514396051	-0.129756	-0.0661381	0.209783093039698	0.142692483581295	-0.0839344	0.160501133797852	0.301465087532025	-0.0946725	0.196159418206424	-0.165283	0.111156559204045	0.00827744065354941
383	KWMTBOMO02723	CellTypeAll-M8	blue	0.427475096723961	0.215068596864457	0.473679985106785	0.00444305699090029	0.000297428371145581	0.321326039246517	-0.202871	-0.238818	0.452177977783611	0.0573421300333875	0.312032826635378	0.199961216549834	0.149021446145185
384	KWMTBOMO02724	CellTypeAll-M12	black	0.091330487422482	-0.0389632	0.0705208567188858	-0.144275	-0.238431	-0.172747	-0.109814	-0.125171	0.383841137119602	0.409349506054846	0.28017622337689	0.480081369342556	0.606736197327736
385	KWMTBOMO02729	CellTypeAll-M7	green	0.0928267352599674	-0.243784	-0.120452	0.505520750868587	0.324542727052303	-0.0873877	-0.0899851	0.534633029461489	-0.267178	0.207712761549187	-0.39241	0.0578518702883675	-0.188842
386	KWMTBOMO02732	CellTypeAll-M8	blue	0.209316045055711	0.0700453842543924	0.194399049514257	0.00618780110715013	-0.0295221	0.0863131089441893	-0.102605	-0.0852673	0.256945778273922	0.143999585922428	0.169091275913135	0.204928839684155	0.154029023329001
387	KWMTBOMO02734	CellTypeAll-M12	black	0.135361295839977	0.0841367282761848	0.125882587345942	-0.183631	-0.288787	-0.101843	-0.1946	-0.230658	0.436430777479397	0.388892816533063	0.397116198203554	0.492507389239309	0.620157679792639
388	KWMTBOMO02744	CellTypeAll-M2	turquoise	0.347809437958753	0.19145660789189	0.332340223085516	0.130746398014458	0.0993412315813096	0.279468042577332	-0.107542	-0.0609635	0.204634107883721	0.0378710569832918	0.152097405922486	0.0991088397845899	0.0436037447090228
389	KWMTBOMO02745	CellTypeAll-M7	green	-0.139536	-0.265639	-0.264703	0.174815093634585	0.131043914289509	-0.248053	0.149600101632864	0.443847257153087	-0.256938	0.122711733754166	-0.333667	-0.0331931	-0.161081
390	KWMTBOMO02747	CellTypeAll-M8	blue	0.031327578957121	-0.0480024	0.0217458055243526	-0.0848445	-0.0581623	-0.050047	0.0156491788972138	-0.12797	0.192659843163422	0.116193764327844	0.158154528676161	0.168335726444562	0.173731141239298
391	KWMTBOMO02748	CellTypeAll-M10	purple	0.256362516811834	0.320871553962932	0.324208291497609	-0.146202	-0.121775	0.210993570335747	-0.0545862	-0.289133	0.365430110022383	0.0379485943345316	0.4286170911551	0.165097304870339	0.301714234106537
392	KWMTBOMO02754	CellTypeAll-M3	red	0.126379741180026	-0.128664	-0.013783	0.432822806677172	0.335453814029302	0.058457005492177	0.016566900564869	0.292725622149179	-0.173383	0.0756169702276059	-0.228176	0.00603477398809498	-0.145685
393	KWMTBOMO02770	CellTypeAll-M2	turquoise	0.241698882486006	0.302619310424354	0.370944507338031	-0.138118	-0.0694376	0.342491603443367	-0.110058	-0.290626	0.275050228064406	-0.129331	0.267748936170004	-0.0215153	0.0338562323705419
394	KWMTBOMO02774	CellTypeAll-M1	greenyellow	0.341823965528248	0.392611024171393	0.373094194854116	0.0192565297562095	0.037713105157587	0.407309071050505	-0.0982776	-0.189069	0.157035725287427	-0.120079	0.238366977198676	-0.0396016	-0.0192081
395	KWMTBOMO02776	CellTypeAll-M8	blue	0.315585025592804	0.183809070558201	0.432602040619362	-0.190599	-0.130302	0.26846172849818	-0.132702	-0.359321	0.507483722468408	-0.0300275	0.346485733745315	0.126502513525598	0.12606605104096
396	KWMTBOMO02777	CellTypeAll-M2	turquoise	0.253571128031813	0.228560435622122	0.322777006339729	-0.0932833	-0.0424269	0.252989049434955	-0.0647801	-0.210681	0.267333456030579	-0.0459775	0.244861026687292	0.0514627148386564	0.0730226633278105
397	KWMTBOMO02778	CellTypeAll-M8	blue	0.295276033979123	0.20632024034179	0.335613382132966	-0.0687673	-0.0607861	0.206404086899388	-0.121858	-0.18879	0.351214061037303	0.0598774810262843	0.26083545733308	0.16577192709116	0.169122446187716
398	KWMTBOMO02783	CellTypeAll-M2	turquoise	0.205243281604409	0.129118575227108	0.203911421042889	0.0540151843702977	0.0497557107016014	0.168992833712683	-0.0560348	-0.0593089	0.131956457781187	0.0116754270012061	0.112486609314918	0.0529989030765627	0.0331221958962666
399	KWMTBOMO02789	CellTypeAll-M7	green	-0.065656	-0.208837	-0.212858	0.174907497709414	0.0904869312280877	-0.217239	0.144136921657358	0.44434421143916	-0.221695	0.198062440651547	-0.288141	0.0380252130870787	-0.0884219
400	KWMTBOMO02790	CellTypeAll-M5	brown	0.384440050060451	0.287552658668734	0.418085739907279	0.0368696514741119	0.151138959468634	0.437437446875745	0.0710885514942832	-0.174791	0.218414162497545	-0.154644	0.187134735823975	-0.0554942	-0.0413296
401	KWMTBOMO02792	CellTypeAll-M8	blue	0.228348814696355	0.153547913439975	0.416372834427202	-0.407483	-0.321596	0.184614604117284	-0.261727	-0.663731	0.766526038913914	0.0362775880709543	0.602418180115539	0.282298612078415	0.377433512680857
402	KWMTBOMO02793	CellTypeAll-M8	blue	0.176048862675081	0.05502541626804	0.3307328396609	-0.366398	-0.293114	0.114606332628818	-0.240125	-0.598341	0.708910274215746	0.0734693542803163	0.535824629430343	0.287036843643946	0.33220981897663
403	KWMTBOMO02805	CellTypeAll-M6	yellow	0.0257070440622374	0.025308596281341	-0.0203828	0.0195509589487294	0.0506725279809421	0.012432932379836	0.194972334191472	0.0925491681832547	-0.083643	-0.0165775	-0.0423286	-0.0477157	-0.0302462
404	KWMTBOMO02808	CellTypeAll-M12	black	0.0666494847428864	0.0738810641919454	0.0842163631954926	-0.145506	-0.149832	-0.00680809	-0.108307	-0.203772	0.252895264890228	0.133241693153168	0.267444495068946	0.197275871092298	0.249009014000156
405	KWMTBOMO02810	CellTypeAll-M6	yellow	-0.170009	-0.223157	-0.213943	-0.0115401	0.194302886138656	-0.147972	0.600938770466612	0.254681413294928	-0.252035	-0.0877399	-0.313627	-0.173058	-0.153334
406	KWMTBOMO02814	CellTypeAll-M2	turquoise	0.320534556127341	0.200616316072177	0.306077264517094	0.0132141435529538	-0.00723406	0.207675256838171	-0.0679499	-0.101943	0.25096212664481	0.067289705655173	0.204366052803392	0.145762596556188	0.14067981805172
407	KWMTBOMO02815	CellTypeAll-M8	blue	0.12985714318755	0.0381217000025649	0.109719095513319	-0.0288632	-0.0689371	0.0102236326252616	-0.0839864	-0.0502256	0.18989276156321	0.144029257376914	0.117227853477877	0.185648592989544	0.148052568047443
408	KWMTBOMO02820	CellTypeAll-M5	brown	0.212940805418631	0.362543642276726	0.307893457481242	-0.0807076	-0.0129033	0.401256404387088	-0.046975	-0.22857	0.114009842139432	-0.194579	0.214685421210615	-0.116998	-0.0644228
409	KWMTBOMO02834	CellTypeAll-M5	brown	0.33496610772235	0.237908519808953	0.357223657346205	0.110338266274351	0.227551170718053	0.455237690258052	0.0601624199060342	-0.128435	0.116951135459543	-0.17988	0.10695052284978	-0.108583	-0.151201
410	KWMTBOMO02840	CellTypeAll-M8	blue	0.188038819953842	0.0372086942406573	0.153531484653922	-0.0635165	-0.169639	-0.0339607	-0.184093	-0.123186	0.379971469914176	0.351493035079454	0.276990269933221	0.414934014049639	0.410584784844328
411	KWMTBOMO02843	CellTypeAll-M5	brown	0.35479650967303	0.209133719810421	0.351145407140896	0.102022008904858	0.125028546103624	0.341646307244629	-0.055646	-0.118734	0.212935949218011	-0.0252876	0.1770468116248	0.051498792416849	0.00725679103897331
412	KWMTBOMO02845	CellTypeAll-M8	blue	0.140265719515621	-0.00360137	0.115046080608365	-0.114317	-0.184595	-0.0729046	-0.181172	-0.14061	0.370019394216565	0.314943579081935	0.248712918244489	0.39349906653729	0.346343894322685
413	KWMTBOMO02846	CellTypeAll-M5	brown	0.201543609741091	0.331826844837151	0.243235625013842	-0.0371283	0.0712519823122983	0.359981883455822	0.11238597728441	-0.153748	0.0363356693112144	-0.20548	0.175450397486491	-0.152412	-0.07186
414	KWMTBOMO02856	CellTypeAll-M2	turquoise	0.249923434521312	0.160294561818342	0.259250426856603	0.0354670604487527	0.0314446857268689	0.202113322766404	-0.0729416	-0.082767	0.17277820749784	0.00457433039650253	0.137396783850932	0.0645896871397311	0.0453601873337744
415	KWMTBOMO02863	CellTypeAll-M2	turquoise	0.189979002260973	0.132783152935111	0.210893392229396	-0.022693	0.00155848529675322	0.15561291403491	-0.039387	-0.11063	0.170677889520343	-0.0113572	0.137438092266457	0.0527623934163379	0.0586313846952181
416	KWMTBOMO02865	CellTypeAll-M6	yellow	-0.271213	-0.237254	-0.269416	-0.0806001	0.237162142261662	-0.18504	0.887805550449061	0.247978042835311	-0.321359	-0.212529	-0.321135	-0.282042	-0.142108
417	KWMTBOMO02869	CellTypeAll-M7	green	-0.102745	-0.437812	-0.374327	0.637656278281549	0.341925698391335	-0.301595	-0.0957172	0.778287991681474	-0.491876	0.343764377628177	-0.626619	0.0888146673829827	-0.255243
418	KWMTBOMO02873	CellTypeAll-M7	green	-0.0155447	-0.132553	-0.115945	0.165390009540242	0.099647404403939	-0.11239	0.0259847638201879	0.251865837157292	-0.117745	0.152809887313061	-0.17065	0.0692765406989727	-0.0295527
419	KWMTBOMO02875	CellTypeAll-M2	turquoise	0.219279941208536	0.141735093549437	0.238208116085998	0.0532065352019183	0.0727299994849958	0.189441862338302	-0.0509876	-0.06201	0.146828597303262	-0.0155724	0.100831429695455	0.0346068701528409	0.0219578335354475
420	KWMTBOMO02880	CellTypeAll-M3	red	0.211689827494028	-0.0134043	0.111132266415737	0.332093150991001	0.208100764683907	0.122755636377313	-0.0774649	0.152593347027123	-0.0166671	0.0738372843574407	-0.0732561	0.0609146473800604	-0.0439203
421	KWMTBOMO02882	CellTypeAll-M7	green	-0.0220093	-0.394166	-0.315958	0.746832914511102	0.423372289787973	-0.213559	-0.123477	0.761887711238554	-0.481783	0.344681968568761	-0.593352	0.102181304472705	-0.251642
422	KWMTBOMO02892	CellTypeAll-M2	turquoise	0.186425324029197	0.10163941166777	0.201915810023031	0.0229843010199219	0.0368741038296204	0.157473397254026	-0.0425861	-0.06826	0.145272502632943	0.000428269120130671	0.10087784984444	0.0457604070846551	0.0199473308664004
423	KWMTBOMO02895	CellTypeAll-M2	turquoise	0.24681857400412	0.131438446632393	0.252311515785224	0.028518029856778	0.0235425570882181	0.174789663034744	-0.0593728	-0.0813288	0.220312200107179	0.0600703641232418	0.15198223030675	0.120989860620061	0.0896932544506326
424	KWMTBOMO02903	CellTypeAll-M2	turquoise	0.17145363100017	0.114293380735509	0.178351212918452	-0.0448461	-0.0157578	0.116238935541005	0.0428660003859839	-0.0723291	0.159900507994467	0.0260805385182324	0.128334434073333	0.080268607937121	0.094406698078155
425	KWMTBOMO02904	CellTypeAll-M5	brown	0.33227409550698	0.316159421022273	0.36280090407187	0.0785486233700815	0.132927724211831	0.438611065674508	-0.0686847	-0.150205	0.127121663170643	-0.149844	0.155495342810082	-0.0755461	-0.0834162
426	KWMTBOMO02907	CellTypeAll-M9	pink	0.0414367167578651	-0.109986	-0.0749488	0.042079789966397	-0.0917474	-0.202252	-0.0664734	0.133327561926997	0.10631018847342	0.418954291855965	0.030122591114985	0.370421288537367	0.306215508214099
427	KWMTBOMO02914	CellTypeAll-M11	magenta	0.112080563075773	-0.0431392	0.022700201486167	0.0614065829504368	-0.0526996	-0.0943438	-0.0789896	0.0527887034579108	0.163517026637916	0.326031656447948	0.0994275414785508	0.355974230438584	0.25394184651786
428	KWMTBOMO02926	CellTypeAll-M2	turquoise	0.204818825081372	0.175087406726547	0.258225073648577	-0.000781437	0.0346071063693342	0.2390213883863	-0.0525589	-0.120523	0.149381074999457	-0.0695152	0.12910195608783	-0.00974923	-0.00555604
429	KWMTBOMO02927	CellTypeAll-M2	turquoise	0.224421004876758	0.122329057592233	0.230040765650717	-0.00349733	0.0043013066313386	0.154405929613148	-0.0504253	-0.0977193	0.20193474162439	0.035731119835244	0.150181130970376	0.0998317817194133	0.0834554805450354
430	KWMTBOMO02935	CellTypeAll-M8	blue	0.169404374180215	0.0779901767721854	0.168404093468107	-0.049379	-0.0721311	0.0549131589190944	-0.0907539	-0.104857	0.241354871112458	0.114030844928276	0.168967351968832	0.179126777488662	0.155738523974986
431	KWMTBOMO02936	CellTypeAll-M9	pink	0.0906627817191751	-0.0648429	-0.0217869	0.0765798130710471	-0.0784212	-0.141749	-0.14318	0.127031517647791	0.113455640428357	0.389432039179198	0.0339780784826553	0.345060736895721	0.247830400654247
432	KWMTBOMO02944	CellTypeAll-M10	purple	0.174758538848946	0.269919746964276	0.232920884085014	-0.125458	-0.108566	0.190235589816089	-0.0963305	-0.211267	0.206286556030922	-0.0215326	0.287117152962885	0.0571767956632774	0.131871590282486
433	KWMTBOMO02979	CellTypeAll-M6	yellow	-0.101218	-0.129855	-0.0936554	-0.0197041	0.325833002777067	0.0408593226410033	0.675498603568928	0.092787374808862	-0.191438	-0.259043	-0.224472	-0.266101	-0.214476
434	KWMTBOMO02991	CellTypeAll-M5	brown	0.270026799004863	0.22322582124827	0.262907959549218	0.253208021924814	0.308613623814926	0.448515288910142	-0.0211091	-0.012494	-0.053515	-0.19828	0.00598242568745316	-0.17736	-0.23665
435	KWMTBOMO02993	CellTypeAll-M5	brown	0.252854397724886	0.318826347543708	0.305282799359831	-0.00758439	0.0452539047732293	0.372903433063774	-0.0610316	-0.175563	0.115483724975017	-0.140032	0.184941465078468	-0.0696998	-0.0411767
436	KWMTBOMO02998	CellTypeAll-M3	red	0.0850615783244213	0.00783540748740879	-0.0475911	0.325500238750175	0.243179456402258	0.0866747696800615	0.0544121690015624	0.293233459685982	-0.250667	0.0398442189285542	-0.194137	-0.0555788	-0.180964
437	KWMTBOMO03003	CellTypeAll-M8	blue	0.220843924546998	0.182720587462992	0.258434208857346	-0.157309	-0.156119	0.0973685775277948	-0.128019	-0.221849	0.367325076783936	0.111222398799622	0.293734374596307	0.22839826781485	0.260188518534988
438	KWMTBOMO03004	CellTypeAll-M11	magenta	0.0650551718803305	-0.0477145	0.00406418928996824	0.00745363733849467	-0.0758497	-0.0935994	-0.097759	0.0487602129480335	0.125014115620631	0.250117183788675	0.0482754378955344	0.277365882130101	0.18704883275265
439	KWMTBOMO03005	CellTypeAll-M12	black	0.186450431752647	0.0469619336221461	0.148363651321518	0.0462637297737881	-0.154104	-0.0439634	-0.355986	-0.169374	0.400347197540962	0.45178878123019	0.334605276922623	0.532790796298601	0.584536450198486
440	KWMTBOMO03008	CellTypeAll-M2	turquoise	0.159342778270586	0.0964740222236461	0.173680997969966	0.0131274454473316	0.0147983448423273	0.130500614819118	-0.0436986	-0.0675188	0.128689783538384	0.00105199093161997	0.100999258915866	0.0462205204299642	0.0279366338590392
441	KWMTBOMO03011	CellTypeAll-M7	green	0.0205368197386829	-0.12355	-0.0963965	0.212147030923943	0.0731739841762089	-0.103679	-0.0393636	0.268907427410992	-0.101951	0.201694756950012	-0.159354	0.124851032910862	0.010239544699404
442	KWMTBOMO03012	CellTypeAll-M12	black	0.0560883939721034	0.0208455746304647	0.0505702110269643	-0.0808066	-0.10175	-0.0334171	-0.0682136	-0.102505	0.179102660930648	0.145425635342149	0.152115533908742	0.195723768536344	0.208779119188515
443	KWMTBOMO03013	CellTypeAll-M6	yellow	-0.0321573	-0.242676	-0.15522	0.299236366392686	0.420752025255619	-0.0325175	0.486978203889787	0.386831934380109	-0.311162	-0.0513695	-0.374283	-0.155361	-0.21751
444	KWMTBOMO03014	CellTypeAll-M6	yellow	0.0398749310906363	0.119638811339944	0.0490922338504795	-0.0198047	0.128264041023745	0.169233687919734	0.227082300008507	-0.0310663	-0.0843902	-0.172612	-0.00101029	-0.16125	-0.120862
445	KWMTBOMO03016	CellTypeAll-M2	turquoise	0.173873088853149	0.0911658061929892	0.191958454889862	0.0332284331527773	0.0372037580616656	0.159627756681838	-0.0501654	-0.0691434	0.129963611221015	-0.0109544	0.0888722463182896	0.0329383139176373	0.00653592166942105
446	KWMTBOMO03027	CellTypeAll-M2	turquoise	0.27054575385318	0.232884869660966	0.324294302727895	0.038706416032286	0.0947098558425226	0.322988560732443	-0.0329571	-0.132562	0.173099871853441	-0.0932447	0.157748034173392	-0.022031	-0.0174372
447	KWMTBOMO03034	CellTypeAll-M8	blue	0.110791408028503	0.0451077385526768	0.191852075266113	-0.283599	-0.250829	-0.00653743	-0.196819	-0.431495	0.533323381269138	0.163948673072874	0.497170051791336	0.323830596789704	0.381587804153546
448	KWMTBOMO03035	CellTypeAll-M10	purple	0.141249863010024	0.175686862989766	0.220974218282805	-0.248679	-0.229268	0.0550893700743722	-0.180636	-0.369158	0.434660478174819	0.109208291511904	0.496084980874659	0.261608149513489	0.371092855352509
449	KWMTBOMO03044	CellTypeAll-M8	blue	0.0214842462750233	-0.0492585	0.0879937797661596	-0.27538	-0.253127	-0.0972828	-0.19607	-0.411604	0.507297395035967	0.186138627316412	0.426200965339996	0.309854593028889	0.372777705523777
450	KWMTBOMO03045	CellTypeAll-M8	blue	0.0276867986357593	-0.00146883	0.128177253572615	-0.342209	-0.312515	-0.0892153	-0.243298	-0.511032	0.589381963059922	0.179843283557522	0.516784933999738	0.343228819416755	0.461038915587436
451	KWMTBOMO03066	CellTypeAll-M9	pink	0.0596994238831577	-0.0930554	-0.0511589	0.0410036963700103	-0.0798052	-0.173243	-0.0290343	0.114795385998458	0.109892712823402	0.393866557680606	0.0466736866579814	0.350831363762629	0.305760012828218
452	KWMTBOMO03092	CellTypeAll-M7	green	-0.0868989	-0.372319	-0.359864	0.616476489134075	0.277878624942387	-0.291848	-0.223571	0.778806601062744	-0.502639	0.358483369966457	-0.606362	0.0898128160779106	-0.250124
453	KWMTBOMO03111	CellTypeAll-M8	blue	0.219094660255513	0.0896253003280351	0.222882725138123	-0.0139965	-0.0295262	0.11873240185605	-0.0953518	-0.0863361	0.242184482707987	0.0823408695502525	0.145098978210063	0.143223778307002	0.0986508057381523
454	KWMTBOMO03113	CellTypeAll-M12	black	0.14732749937076	0.158027659398559	0.167248411967011	-0.152343	-0.176598	0.019823588745636	-0.0740416	-0.228901	0.342370278262487	0.192055965298428	0.357028957865696	0.294226544103592	0.394339017155015
455	KWMTBOMO03118	CellTypeAll-M2	turquoise	0.260398243154811	0.176309032849153	0.315961439380523	-0.0216818	0.00745743968722998	0.241415779863414	-0.0771121	-0.154497	0.231784714789225	-0.0398772	0.175719893756549	0.041247808954074	0.0305374417065045
456	KWMTBOMO03120	CellTypeAll-M9	pink	0.0292609698515595	-0.149166	-0.1003	0.058265118425655	-0.0585296	-0.229163	0.0277715536261319	0.158627441166093	0.0922507674581963	0.442346923067707	0.0138719667721773	0.393263473237288	0.348800835786334
457	KWMTBOMO03122	CellTypeAll-M5	brown	0.184008340219335	0.25176644422986	0.226189431261583	0.0227119097994514	0.0546650676296697	0.278877111672159	-0.0565158	-0.0982982	0.0604478117136902	-0.103672	0.119534105691033	-0.0621902	-0.0297231
458	KWMTBOMO03124	CellTypeAll-M2	turquoise	0.22406991412077	0.315046814249892	0.33671920083342	-0.130521	-0.0658922	0.348308113016721	-0.0867175	-0.269998	0.209192052147909	-0.14483	0.250434115953841	-0.0485788	-0.00678045
459	KWMTBOMO03143	CellTypeAll-M3	red	0.141592772839052	-0.033969	0.0241619510306635	0.324391570596431	0.189487999713604	0.083176275017534	-0.041508	0.182725012172677	-0.110902	0.0598181172169592	-0.118691	0.0144572447630056	-0.0880553
460	KWMTBOMO03147	CellTypeAll-M2	turquoise	0.419607320837221	0.355173206247513	0.48015281745787	0.0125046526886647	0.062113744054753	0.430307928416961	-0.0939775	-0.210524	0.274678910889262	-0.12223	0.259151029687897	-0.00545438	0.0258884655242631
461	KWMTBOMO03151	CellTypeAll-M7	green	0.0496457252520262	-0.210716	-0.118816	0.421648941806566	0.368497929184289	-0.0316662	0.0877119896851684	0.437670884099027	-0.272502	0.0812557538473657	-0.353682	-0.0431851	-0.219038
462	KWMTBOMO03152	CellTypeAll-M6	yellow	0.0304076359365557	-0.140317	-0.0613968	0.172209186482222	0.190126947787434	-0.0452799	0.283618702035788	0.254516574724032	-0.11825	0.0513390340098402	-0.188867	-0.0120517	-0.0648784
463	KWMTBOMO03163	CellTypeAll-M3	red	0.049310473483539	-0.237684	-0.148197	0.515256272556708	0.317937836741977	-0.0907724	-0.0118473	0.459117575763335	-0.266439	0.230401369014009	-0.345039	0.0992233056742815	-0.111673
464	KWMTBOMO03169	CellTypeAll-M11	magenta	0.299791408548312	0.0571992902545814	0.237008114325245	0.0670619905939256	-0.0603323	0.0418979186720293	-0.224265	-0.0395588	0.36014388032082	0.350258329952757	0.209162264055274	0.441834030401393	0.322994240375141
465	KWMTBOMO03174	CellTypeAll-M2	turquoise	0.379520639313934	0.204579087029634	0.3784149268773	0.121454305906974	0.109676559279832	0.31874784001184	-0.115173	-0.0819588	0.206861087783715	-0.0211429	0.148436592305669	0.0521407864513674	-0.00154411
466	KWMTBOMO03177	CellTypeAll-M5	brown	0.413095185239334	0.382155645058232	0.441390510641845	0.0745288513051694	0.121425073866103	0.48144008953395	-0.105427	-0.195325	0.181211938026846	-0.153933	0.237301824617589	-0.060893	-0.0447572
467	KWMTBOMO03197	CellTypeAll-M6	yellow	0.0735211478440252	-0.000220396	0.0521090638812522	0.0830559950698119	0.149056351252403	0.0842302409753748	0.154303190365874	0.0652704409038353	-0.0249741	-0.0403521	-0.0451213	-0.0423497	-0.0618279
468	KWMTBOMO03204	CellTypeAll-M10	purple	0.252075319902591	0.517982749957173	0.385496828261095	-0.328341	-0.297548	0.309186327431249	-0.227202	-0.496488	0.398865415548507	-0.0518684	0.60442171562429	0.121130594387508	0.314809226103211
469	KWMTBOMO03208	CellTypeAll-M1	greenyellow	0.176303830835737	0.544035673657947	0.250812604305444	-0.195445	-0.175041	0.394719007849794	-0.126337	-0.322524	0.026256045166348	-0.226783	0.329375596105736	-0.154691	-0.057153
470	KWMTBOMO03213	CellTypeAll-M3	red	0.113769806904279	-0.0455459	0.0365213862023279	0.287136178887707	0.23334956165042	0.0782352322465618	-0.0513506	0.155415155546692	-0.0701724	0.0620691924578716	-0.115832	0.0226875841885101	-0.090476
471	KWMTBOMO03214	CellTypeAll-M2	turquoise	0.185060001227131	0.108290328591402	0.226967085528902	-0.000140919	0.0186544140490425	0.169180654712444	-0.0668485	-0.098758	0.174440711980258	-0.0137246	0.111932821718188	0.0446372663146429	0.0228695931984385
472	KWMTBOMO03216	CellTypeAll-M2	turquoise	0.246175888485673	0.218471591730657	0.295061947323543	-0.0246799	-0.0217225	0.251929646084606	-0.125958	-0.184052	0.234858797196792	-0.00420768	0.223739193108335	0.0778584875256249	0.0718803746668348
473	KWMTBOMO03231	CellTypeAll-M5	brown	0.194596983096945	0.207353102913656	0.219140547113184	0.00864796131642474	0.0505245630941633	0.254939469133389	-0.0118782	-0.105899	0.0879879340939366	-0.0915929	0.120929621050723	-0.043765	-0.0278974
474	KWMTBOMO03233	CellTypeAll-M8	blue	0.163638081009301	0.0564081349129129	0.149440389874084	-0.00853974	-0.0310668	0.0715429223883604	-0.0701145	-0.0584309	0.185879148190621	0.103526838052427	0.114135063502425	0.145657337287208	0.105919270224673
475	KWMTBOMO03235	CellTypeAll-M2	turquoise	0.187786288552497	0.114134002283625	0.195133728008451	-0.0125571	-0.0232263	0.122047045403096	-0.072684	-0.0965087	0.189307624771021	0.0576811539523935	0.155130296151665	0.11264672855749	0.0967388860621436
476	KWMTBOMO03236	CellTypeAll-M8	blue	0.198046612026206	0.0908020302666587	0.225208112506053	-0.0850605	-0.0799459	0.100503761408735	-0.101584	-0.163159	0.310439288970316	0.0980677311363065	0.215685171608677	0.181956562271662	0.155246320076888
477	KWMTBOMO03241	CellTypeAll-M9	pink	0.0530104955839299	-0.101587	-0.0579154	0.0450649434288999	-0.130027	-0.210661	-0.180524	0.0809907022525204	0.178644083560544	0.471147554970918	0.102891482678038	0.436487208555462	0.368693612015603
478	KWMTBOMO03244	CellTypeAll-M3	red	0.0629826103751218	-0.0914491	-0.068976	0.30701181746274	0.167636622445374	-0.0363771	-0.02948	0.276176672875582	-0.149085	0.161729003371991	-0.1705	0.0730753306505007	-0.0698114
479	KWMTBOMO03245	CellTypeAll-M2	turquoise	0.209229271593809	0.128117045620444	0.232073769939728	-0.0215567	-0.0283419	0.150996777012539	-0.0900801	-0.109529	0.20985262089489	0.0333868527758054	0.15646786661455	0.0952600212659397	0.0747869211159384
480	KWMTBOMO03246	CellTypeAll-M2	turquoise	0.299305360699357	0.21482783236437	0.388295308510946	-0.0855331	-0.0339622	0.297247284460686	-0.0939287	-0.238407	0.327194730365765	-0.0520497	0.250281394677925	0.061013062399062	0.0575390738392614
481	KWMTBOMO03264	CellTypeAll-M8	blue	0.126033937015644	0.0216091717238931	0.11886268785838	-0.0788249	-0.11049	-0.00856798	-0.106239	-0.127146	0.283457338431745	0.196123010963785	0.205825762416554	0.261182604169887	0.233003981785605
482	KWMTBOMO03279	CellTypeAll-M5	brown	0.233234362729314	0.249830516099155	0.280230854719489	0.022413248899204	0.0533488608600366	0.319170951068773	-0.0729865	-0.129195	0.120976388602092	-0.0991044	0.14575123770568	-0.0406771	-0.0311394
483	KWMTBOMO03285	CellTypeAll-M2	turquoise	0.2296036279787	0.137371352490428	0.253326315830541	-0.0137937	-0.0139063	0.172159990887364	-0.0721	-0.111351	0.215440728862873	0.0210419985476105	0.151671495657291	0.0909233610863231	0.0697988048119808
484	KWMTBOMO03297	CellTypeAll-M5	brown	0.354803501587961	0.290259617710554	0.363658971916865	0.119849274272191	0.167071580173932	0.419816638795506	-0.0385337	-0.116048	0.147280510138413	-0.102286	0.153972563203927	-0.0225958	-0.0369311
485	KWMTBOMO03301	CellTypeAll-M2	turquoise	0.250317095876662	0.20784094194948	0.27951036525903	-0.048496	-0.0322101	0.199751794445329	-0.0528741	-0.151831	0.242318252912636	0.0161494237591807	0.21761397207572	0.0988490838578079	0.121725832375068
486	KWMTBOMO03302	CellTypeAll-M5	brown	0.340908281972593	0.368015971492999	0.384913459328544	0.0123852319430132	0.0924116801520099	0.454179716574169	-0.00804246	-0.204075	0.160653079009833	-0.170146	0.215195484246733	-0.0788082	-0.0462198
487	KWMTBOMO03306	CellTypeAll-M5	brown	0.334534155585272	0.296287938454959	0.360946396257044	0.094246768887724	0.22946867245552	0.470044095033475	0.164532976020973	-0.115497	0.0725264374866659	-0.250704	0.107486029252323	-0.172521	-0.140238
488	KWMTBOMO03308	CellTypeAll-M8	blue	0.117600868938273	0.0421757730731159	0.111847766880584	-0.0459543	-0.0614054	0.024743352752065	-0.0541574	-0.0739427	0.185707874413629	0.106992713654625	0.130210891502481	0.153635498086646	0.137548326525592
489	KWMTBOMO03310	CellTypeAll-M2	turquoise	0.167644907118234	0.220499298068875	0.277240313228355	-0.117902	-0.0304715	0.272063427409704	-0.00763514	-0.210146	0.186023199987076	-0.129281	0.169553335549273	-0.0474179	-0.00909925
490	KWMTBOMO03311	CellTypeAll-M2	turquoise	0.436848856925832	0.291818906738767	0.492266248183341	-0.018261	-0.00804812	0.368117951119005	-0.140182	-0.269958	0.417966554518597	0.0125267385581371	0.345132760036879	0.161670090466822	0.170299570626141
491	KWMTBOMO03312	CellTypeAll-M3	red	0.335508532713838	-0.0217797	0.172943573835324	0.503393045346005	0.406069916901664	0.221044559794301	-0.042182	0.287231662690141	-0.071138	0.0545224729867124	-0.172	0.0127526644748809	-0.171913
492	KWMTBOMO03314	CellTypeAll-M12	black	0.0441113744838984	0.0192064843661245	0.0742988860286739	-0.324585	-0.386623	-0.199209	-0.128046	-0.271414	0.45660062264103	0.365011234093125	0.396667440148477	0.472925085952506	0.690457848250871
493	KWMTBOMO03317	CellTypeAll-M9	pink	0.0972859972525508	-0.123926	-0.0031334	0.0532188547318331	-0.149926	-0.239852	-0.269787	0.0651135413624232	0.281058366484766	0.553432202535685	0.130646534610206	0.541421981441764	0.498839038643989
494	KWMTBOMO03337	CellTypeAll-M2	turquoise	0.298015707023807	0.196407513274088	0.329639286665772	0.0197218749869041	0.0467527974942269	0.250817852115137	-0.0420045	-0.126523	0.248311654921664	-0.000748924	0.183985278638841	0.0826931830977683	0.0767600913606768
495	KWMTBOMO03346	CellTypeAll-M5	brown	0.186777245881615	0.210539640014125	0.212143142707958	0.0027606674138111	0.0567717473978896	0.254586744552518	-0.00351789	-0.10161	0.0749795640752435	-0.0942428	0.11653279967711	-0.0526193	-0.0241485
496	KWMTBOMO03385	CellTypeAll-M5	brown	0.283513300287552	0.197398000952472	0.281746162066217	0.101746435462103	0.149625453707783	0.329428295988949	0.00924164333281596	-0.0700908	0.0999472793412341	-0.09828	0.0965895132803483	-0.0460984	-0.0729207
497	KWMTBOMO03391	CellTypeAll-M6	yellow	0.131430086944973	0.0305087835466173	0.127569175939123	0.0222265100797593	0.134861888380485	0.100555183318338	0.213668484025265	0.053241831465618	0.0797032833893294	-0.00209773	-0.00602154	0.0111814059012357	-0.0141327
498	KWMTBOMO03393	CellTypeAll-M6	yellow	-0.053324	-0.0916239	-0.086524	-0.0135395	0.0878293107762043	-0.055443	0.269488120582631	0.109077500334375	-0.0958988	-0.0439329	-0.139584	-0.0747167	-0.0768722
499	KWMTBOMO03397	CellTypeAll-M2	turquoise	0.219994577488812	0.0845524439897242	0.22335827973295	0.0589421825108342	0.0491410721255668	0.15585281578686	-0.0877787	-0.0626199	0.182578934050075	0.0541002171136066	0.117020947648677	0.105289194213962	0.0490233046121437
500	KWMTBOMO03401	CellTypeAll-M3	red	0.110718006934297	-0.103811	-0.0361126	0.32824092034618	0.195923429547513	-0.0148954	0.0293236400873431	0.261236887763819	-0.109249	0.170207947118529	-0.173742	0.103868287692096	-0.0466619
501	KWMTBOMO03405	CellTypeAll-M6	yellow	-0.0775258	-0.107494	-0.116689	0.00587042762783645	0.0515647742364098	-0.098067	0.20989693723614	0.15788340601521	-0.117163	0.00386595804498918	-0.15037	-0.0555428	-0.0706343
502	KWMTBOMO03412	CellTypeAll-M9	pink	0.0817499911318204	-0.107859	-0.0496094	0.0871077525552762	-0.0856941	-0.179038	-0.167697	0.137630797831668	0.130102627962364	0.454425419092079	0.042191010975819	0.404528616617146	0.285175529737975
503	KWMTBOMO03415	CellTypeAll-M6	yellow	0.152811231953057	0.0970457457973935	0.129270862192079	0.0720972441547039	0.215103759722839	0.212636320886895	0.246446074393461	0.00672337221356022	-0.0290969	-0.139631	-0.017007	-0.118518	-0.105242
504	KWMTBOMO03420	CellTypeAll-M2	turquoise	0.286660658448379	0.47232780426723	0.401774971448592	-0.171417	-0.139316	0.309302083564278	-0.1362	-0.280944	0.291338685186771	-0.0966462	0.353837131392172	0.0269055313093892	0.182044090482397
505	KWMTBOMO03422	CellTypeAll-M10	purple	0.261619529599543	0.59983001695625	0.413659273107305	-0.270226	-0.253352	0.328300577385821	-0.202415	-0.399249	0.325968085278031	-0.128634	0.51718041109965	0.0342254567308657	0.307550028735302
506	KWMTBOMO03424	CellTypeAll-M7	green	-0.124027	-0.278253	-0.271943	0.299292460501831	0.294525418284231	-0.216098	0.337126499360658	0.491772784615248	-0.337801	0.170909953447492	-0.403573	0.00649780788738598	-0.13165
507	KWMTBOMO03432	CellTypeAll-M4	tan	0.125964681477633	-0.0334067	0.0465192412382801	0.250884595568622	0.32864076179211	0.120721772144786	0.182903685357287	0.173752389737289	-0.109153	-0.0414505	-0.133645	-0.0649634	-0.127534
508	KWMTBOMO03433	CellTypeAll-M5	brown	0.119556640662111	0.174576733268658	0.137245104543238	0.00754935201251588	0.0307815156612011	0.197809212559189	-0.0173601	-0.0755355	0.0152593058617068	-0.0864532	0.0826075233985245	-0.059704	-0.0434209
509	KWMTBOMO03439	CellTypeAll-M2	turquoise	0.2454551847603	0.21035247058677	0.320749789209008	-0.0593841	0.0222180179319645	0.294517220496853	-0.00398656	-0.201791	0.22389133405596	-0.102686	0.184137023478948	-0.0111844	0.00806896966745607
510	KWMTBOMO03449	CellTypeAll-M5	brown	0.191600865476889	0.237102073471043	0.236598999592916	0.000565860282691066	0.0412438503523484	0.279104319618523	-0.0557929	-0.124774	0.0995976727027119	-0.0988895	0.134680406352422	-0.0452087	-0.0218585
511	KWMTBOMO03450	CellTypeAll-M5	brown	0.252251591514393	0.163101087104428	0.270460853936529	0.170041362899029	0.214290529638956	0.353142494114239	-0.0627389	-0.0563119	0.0629714958787774	-0.122064	0.0431682572091748	-0.0798336	-0.137994
512	KWMTBOMO03453	CellTypeAll-M1	greenyellow	0.165707331555357	0.425247657069973	0.166212698415675	-0.000932865	-0.00588056	0.330978488779639	-0.0939828	-0.128528	-0.0826905	-0.160162	0.162076780666979	-0.141514	-0.0936274
513	KWMTBOMO03463	CellTypeAll-M10	purple	0.20574629358636	0.253591271529059	0.236140823652842	-0.0514951	-0.0645218	0.203280325137673	-0.110978	-0.172772	0.189810271351576	0.00685358788680087	0.257635188030609	0.075599703812601	0.122678246168884
514	KWMTBOMO03469	CellTypeAll-M8	blue	0.169262240952564	0.0970892118134836	0.187450565766292	-0.0545359	-0.0533966	0.0972783393807964	-0.0731238	-0.125309	0.241191982457874	0.0738658629525059	0.174829649763391	0.139861352767565	0.130134509541217
515	KWMTBOMO03474	CellTypeAll-M2	turquoise	0.233482290478239	0.147840228950417	0.248116503264518	0.0300937079023405	0.0596032212617026	0.208877598764436	-0.0134101	-0.0692186	0.153109093731166	-0.020741	0.114842877488314	0.0327980659563523	0.0198349467020161
516	KWMTBOMO03475	CellTypeAll-M8	blue	0.302228996386109	0.0923088998605516	0.290226656915013	-0.01032	-0.0282944	0.136041174414462	-0.113907	-0.121162	0.353919690533361	0.143962390984907	0.219060560762024	0.229720708143922	0.17605281679459
517	KWMTBOMO03476	CellTypeAll-M8	blue	0.244264711353497	0.131144525433736	0.25789449485373	-0.0174413	-0.013681	0.159032000409328	-0.0806181	-0.114454	0.257974438944533	0.049869485232611	0.173159853112238	0.121207722593156	0.102497100876938
518	KWMTBOMO03484	CellTypeAll-M1	greenyellow	0.227423770186841	0.567690001472619	0.294897052153293	-0.197462	-0.183276	0.346496394136423	-0.131609	-0.301858	0.105879592706123	-0.159005	0.359824356613298	-0.0718519	0.0847975057674669
519	KWMTBOMO03487	CellTypeAll-M3	red	0.252510945836114	0.0487701661245549	0.172831832230185	0.370764362069849	0.320624635436884	0.274143283438603	-0.0431802	0.159662854036356	-0.0667152	-0.0186673	-0.114086	-0.0410502	-0.193578
520	KWMTBOMO03503	CellTypeAll-M8	blue	0.230108538861405	0.147279404788044	0.287681211255786	-0.112264	-0.0963843	0.159266201319783	-0.121997	-0.245184	0.378218426039477	0.0417562380689904	0.296405536694157	0.14785920460082	0.175763159828637
521	KWMTBOMO03514	CellTypeAll-M7	green	0.0199078706279138	-0.0817504	-0.0581848	0.152648842084411	0.105239526470861	-0.0442136	0.0244897729965805	0.201695153696596	-0.0900421	0.101291130485852	-0.130037	0.039640655035273	-0.0385444
522	KWMTBOMO03519	CellTypeAll-M2	turquoise	0.19169034733648	0.12083106026749	0.222030595191693	-0.00804791	0.00203171048178922	0.162518436069712	-0.0661868	-0.103531	0.177336269939352	-0.00207507	0.13387544869467	0.0550794929909422	0.0432368191972555
523	KWMTBOMO03521	CellTypeAll-M2	turquoise	0.233100870497901	0.241027463177533	0.313374156097326	-0.0728445	-0.0263906	0.276866392962949	-0.0649312	-0.195654	0.223931314582035	-0.0865301	0.209070894528778	-0.000613683	0.033542697819099
524	KWMTBOMO03522	CellTypeAll-M2	turquoise	0.194849882510191	0.212369472521566	0.256123491540647	-0.0521003	-0.0131782	0.229591492894756	-0.0522479	-0.154408	0.17469285613408	-0.0672279	0.169891467240716	0.000884341212950599	0.0366984061065422
525	KWMTBOMO03533	CellTypeAll-M1	greenyellow	0.137400848147975	0.41997645773066	0.184415080820922	-0.0854563	-0.0403384	0.322139875822919	-0.0267921	-0.174201	-0.0281493	-0.190069	0.191991443738097	-0.148657	-0.0535308
526	KWMTBOMO03537	CellTypeAll-M10	purple	0.248262100552648	0.622919236650272	0.456651389480009	-0.500112	-0.45989	0.323821173202133	-0.345405	-0.736854	0.564050683781443	-0.0815023	0.812696016748374	0.163404015152746	0.454392835580009
527	KWMTBOMO03539	CellTypeAll-M10	purple	0.164630329144147	0.214800193041804	0.22949992302405	-0.180655	-0.154943	0.129328564741661	-0.110592	-0.270836	0.294431631476682	0.0370063590750031	0.338538501073219	0.150137454692995	0.247860113213904
528	KWMTBOMO03544	CellTypeAll-M2	turquoise	0.360170652555452	0.389717188507654	0.548006828208294	-0.204257	-0.111693	0.442501107481354	-0.151311	-0.415449	0.453082766833364	-0.146928	0.395097174555278	0.0270257933036807	0.101154134117599
529	KWMTBOMO03557	CellTypeAll-M7	green	0.0146815290754083	-0.16018	-0.129957	0.2502612138209	0.101175032606099	-0.13432	-0.0157	0.321189839363056	-0.13832	0.23874509885479	-0.203985	0.150889709900454	0.0130866200825564
530	KWMTBOMO03558	CellTypeAll-M7	green	-0.133143	-0.459945	-0.412382	0.609231126713217	0.359537796386849	-0.326335	0.0494076958037979	0.823097443520031	-0.536794	0.318954074646611	-0.664254	0.0534478158006047	-0.253852
531	KWMTBOMO03573	CellTypeAll-M8	blue	0.086058927927729	0.11525771751163	0.239328839226976	-0.414478	-0.368764	0.0109075517466588	-0.296063	-0.634138	0.683071700232269	0.11969889707855	0.615337946839623	0.330491243105091	0.501325815071223
532	KWMTBOMO03585	CellTypeAll-M3	red	0.152457856882138	-0.00480784	0.0531767169427505	0.269244499587587	0.18122464469172	0.0734161735024863	-0.0267359	0.183355731080745	-0.0706142	0.081709466115268	-0.0948153	0.0439337176952267	-0.0485533
533	KWMTBOMO03602	CellTypeAll-M7	green	-0.0169801	-0.15669	-0.136397	0.185781669992629	0.155473586750701	-0.12152	0.185766074311774	0.306799527059438	-0.157973	0.131261518517475	-0.20462	0.0470039911062203	-0.0374098
534	KWMTBOMO03606	CellTypeAll-M3	red	0.0502719862554354	-0.0760993	-0.0267266	0.22326994593966	0.168669578031647	0.00570726954920514	0.0562779652152015	0.170675029228679	-0.0917672	0.0593418556830267	-0.12427	0.0184402952104547	-0.0641086
535	KWMTBOMO03609	CellTypeAll-M6	yellow	-0.103566	-0.120172	-0.112006	-0.0293447	0.273411540521845	-0.000494485	0.641409593963065	0.0959657078148733	-0.178475	-0.224438	-0.206646	-0.234123	-0.178199
536	KWMTBOMO03610	CellTypeAll-M6	yellow	-0.000105363	-0.0607921	-0.0289105	-0.00876635	0.16487368326468	0.0168326743937527	0.356597894295101	0.05623319449494	-0.0462911	-0.0760965	-0.0874297	-0.068555	-0.060509
537	KWMTBOMO03613	CellTypeAll-M2	turquoise	0.205312788093135	0.191066391863192	0.274078243403682	-0.00935289	0.0382194511212086	0.269386744955028	-0.0619201	-0.146678	0.158856314098797	-0.0918096	0.13956082201449	-0.0253051	-0.0218698
538	KWMTBOMO03630	CellTypeAll-M2	turquoise	0.331731758803875	0.298761615508249	0.422682967955163	0.0407635784792759	0.10579042070898	0.404940540512809	-0.0831249	-0.207092	0.258663352700891	-0.107199	0.219674562244996	0.00114589626100451	0.0275060626289338
539	KWMTBOMO03646	CellTypeAll-M3	red	0.15565173337743	-0.0551447	0.0213104452493931	0.399743310317874	0.266994143723276	0.107540206384724	-0.0484996	0.206783148081313	-0.148723	0.0253411467052131	-0.150701	-0.0284059	-0.141981
540	KWMTBOMO03648	CellTypeAll-M8	blue	0.181112293957208	0.0502163518913142	0.281550412487486	-0.253503	-0.207203	0.102748507714267	-0.172186	-0.422806	0.554347442492158	0.0794236438645129	0.426360641247204	0.233229742717127	0.241216579695364
541	KWMTBOMO03687	CellTypeAll-M2	turquoise	0.252728383995848	0.173326268690252	0.293043149094227	0.000633181122708739	0.0186745597836702	0.217279531613688	-0.0828744	-0.128998	0.224554858058513	-0.0044291	0.172182739666107	0.0743542489378763	0.0691627512787586
542	KWMTBOMO03688	CellTypeAll-M2	turquoise	0.193094238081145	0.170611589200336	0.209929829970817	-0.00895613	-0.0186435	0.166051813684245	-0.0503832	-0.103216	0.161750658729414	0.0124497178748625	0.164469729680097	0.0654050092144201	0.0794066294505974
543	KWMTBOMO03691	CellTypeAll-M2	turquoise	0.269483950937869	0.187065750145958	0.295524585229459	-0.0163446	-0.0120605	0.202328844397987	-0.0895501	-0.134073	0.26159517664101	0.0503123654784261	0.205747456863675	0.128542266784813	0.125388307873997
544	KWMTBOMO03713	CellTypeAll-M2	turquoise	0.345585979242459	0.313373925626358	0.38494897243395	0.0354159857861255	0.070021210811918	0.364619009285578	-0.080938	-0.137334	0.186234300479459	-0.0790081	0.196565648419988	-0.00774904	0.00678109721549066
545	KWMTBOMO03723	CellTypeAll-M8	blue	0.101281294771748	0.0296068656997365	0.0874677614186879	-0.0773131	-0.0991354	-0.0178801	-0.0635249	-0.0857173	0.210909141752152	0.152866744240093	0.153093468512458	0.205469134860976	0.19965551888422
546	KWMTBOMO03748	CellTypeAll-M2	turquoise	0.208516042296456	0.148653031330547	0.23856741633115	0.0153416618833798	-0.000378436	0.160001836025137	-0.119426	-0.104542	0.216985925200102	0.0608771445434219	0.160827871194695	0.123912352199559	0.10460048603815
547	KWMTBOMO03753	CellTypeAll-M10	purple	0.121586627899442	0.137048924854074	0.135723999342789	-0.0565412	-0.0486119	0.0919522387762747	-0.0164095	-0.10742	0.14636954456915	0.0350556238247147	0.179913175455553	0.087956645391609	0.135335203136295
548	KWMTBOMO03760	CellTypeAll-M8	blue	0.256553093042379	0.0755200013508277	0.25310679991354	-0.0366431	-0.0958487	0.0897501584575973	-0.187964	-0.161296	0.388428925716746	0.200300650549772	0.261854829408266	0.300467597982211	0.269225681091971
549	KWMTBOMO03763	CellTypeAll-M7	green	-0.0471764	-0.205063	-0.196356	0.264186078371803	0.108694414588101	-0.196186	-0.0605859	0.420062008480857	-0.207214	0.250184311601141	-0.286589	0.095340968628185	-0.086797
550	KWMTBOMO03764	CellTypeAll-M4	tan	0.110186349658459	-0.0272658	0.065208271415371	0.218438615968586	0.406836023634972	0.180845407462167	0.274067149217389	0.137846559220757	-0.121262	-0.123833	-0.154229	-0.140844	-0.19233
551	KWMTBOMO03779	CellTypeAll-M2	turquoise	0.198229453376534	0.212389449344723	0.261512677382923	-0.0200545	0.0260246135426104	0.256686108226476	-0.0540495	-0.144124	0.14904998504048	-0.0896424	0.155355383172715	-0.0256657	0.00163037690557102
552	KWMTBOMO03790	CellTypeAll-M2	turquoise	0.232531705730273	0.166499301471416	0.255815576651815	0.0320536526349483	0.0618084360447273	0.219197913657956	-0.0515211	-0.0930974	0.157581778576907	-0.0266248	0.130056977674432	0.0291987787940648	0.0230480290395744
553	KWMTBOMO03794	CellTypeAll-M8	blue	0.0680772726139693	-0.00312114	0.0572811910747324	-0.056854	-0.0856779	-0.0336611	-0.0856815	-0.0934205	0.193258173804218	0.157846584202635	0.14839867977214	0.204709728952312	0.181387020994835
554	KWMTBOMO03798	CellTypeAll-M5	brown	0.219382329049974	0.189481318548421	0.201911358562603	0.218373544370212	0.275834137751903	0.368705718693326	0.00363300067015057	0.0110457780790707	-0.0709883	-0.158451	-0.0022858	-0.149297	-0.197997
555	KWMTBOMO03836	CellTypeAll-M5	brown	0.176559571070946	0.0933103034635123	0.180857589035256	0.114272669352606	0.189912603173986	0.254728132729829	0.0496352140855945	-0.0302488	0.0267265719654331	-0.111899	0.0127155001726873	-0.0785357	-0.109946
556	KWMTBOMO03847	CellTypeAll-M6	yellow	0.0750040064025928	0.00101843131201708	0.0414357614996236	0.152613038508206	0.205421267687737	0.105642187724078	0.125723577037519	0.091757821809348	-0.074394	-0.0485155	-0.0819338	-0.0660452	-0.0962858
557	KWMTBOMO03850	CellTypeAll-M6	yellow	0.049787182160639	-0.0494181	0.0189657731119401	0.122062923110763	0.244584219240553	0.116257079740281	0.171295926446689	0.0418413443805179	-0.0772998	-0.101815	-0.122604	-0.101881	-0.159631
558	KWMTBOMO03851	CellTypeAll-M7	green	0.0127973002813319	-0.0876174	-0.0814941	0.144836544881207	0.037800638485295	-0.0941695	-0.043317	0.200321635517469	-0.0718138	0.186058393310872	-0.110898	0.12158034073572	0.0236573804783328
559	KWMTBOMO03852	CellTypeAll-M2	turquoise	0.311615798659286	0.356824921867985	0.420737924324604	-0.0765868	-0.0290931	0.368609925218023	-0.124464	-0.255721	0.280482064724095	-0.106849	0.274170509767299	0.00669277921614115	0.0645076865693212
560	KWMTBOMO03853	CellTypeAll-M2	turquoise	0.197788457068943	0.220545828505262	0.263794683561369	-0.0339829	-0.00639776	0.229742127423456	-0.076846	-0.145013	0.177270344021453	-0.0539381	0.166515755247761	0.015689041613165	0.0486879030364403
561	KWMTBOMO03854	CellTypeAll-M2	turquoise	0.298119259032422	0.123425066595022	0.314546430894649	0.084927293339111	0.0994940998155038	0.250258896349116	-0.0761582	-0.0877872	0.215170395482659	3.42366900723099e-05	0.127975539141322	0.0717593937409455	0.00806834111262137
562	KWMTBOMO03860	CellTypeAll-M2	turquoise	0.437948944510815	0.470588463266815	0.600442416305336	-0.141632	-0.0658646	0.478415572740271	-0.162159	-0.371051	0.452464826386449	-0.142279	0.389856381150644	0.0379247898113338	0.13562164608176
563	KWMTBOMO03861	CellTypeAll-M5	brown	0.291172569614794	0.246392694427716	0.350211286624953	0.0925773583953237	0.280801116883477	0.471293040513151	0.155646233410576	-0.118968	0.0780943692154831	-0.254254	0.0683997841432856	-0.176011	-0.17637
564	KWMTBOMO03862	CellTypeAll-M5	brown	0.197566455816977	0.184175176685858	0.225908849429181	0.0650543552316653	0.115267174291946	0.282744066949082	-0.00260095	-0.0727108	0.0716600398783914	-0.0999356	0.0832698364041037	-0.0582095	-0.0597861
565	KWMTBOMO03868	CellTypeAll-M8	blue	0.142800794299201	0.0346932691387896	0.131068404479239	-0.039116	-0.0707054	0.0226735589655279	-0.0927389	-0.0914666	0.231473945578196	0.142930400736753	0.15858842493145	0.198224203085014	0.164977412994514
566	KWMTBOMO03873	CellTypeAll-M11	magenta	0.0654959810117149	-0.0578821	-0.0154925	0.0368272523887575	-0.081087	-0.124659	-0.105352	0.0589412174269048	0.135840090484161	0.303444513602884	0.0795049689405337	0.319972207673798	0.233445406216447
567	KWMTBOMO03884	CellTypeAll-M2	turquoise	0.148553026092276	0.140698513562806	0.200136022414515	-0.0599854	-0.0395956	0.156122684385161	-0.0703991	-0.145257	0.178088056138116	-0.0110243	0.159903525126592	0.0518935622615312	0.0638213116769073
568	KWMTBOMO03900	CellTypeAll-M7	green	-0.0201704	-0.247105	-0.213667	0.339304349666963	0.201027046869472	-0.188384	0.0905299984427117	0.506118330407914	-0.266115	0.242645542707666	-0.353505	0.0773254476840058	-0.0990577
569	KWMTBOMO03901	CellTypeAll-M7	green	-0.0683767	-0.175072	-0.174255	0.168303995093202	0.131703547658961	-0.150693	0.10989290701585	0.347010445072691	-0.188762	0.119204957367683	-0.24966	0.00119619410305005	-0.113937
570	KWMTBOMO03903	CellTypeAll-M7	green	0.0251432545588461	-0.196852	-0.147607	0.367085996969345	0.222302904308277	-0.110717	0.102695409943866	0.407658407865597	-0.221263	0.193008212379953	-0.281008	0.0727991560784294	-0.0711019
571	KWMTBOMO03904	CellTypeAll-M7	green	-0.0192718	-0.217002	-0.198491	0.340396987892691	0.199549359389328	-0.174084	0.0614181204323847	0.465910772612652	-0.24914	0.261541290390308	-0.312842	0.116231974883334	-0.0642358
572	KWMTBOMO03910	CellTypeAll-M8	blue	0.0887614830915087	-0.000711187	0.0729090076769496	-0.0635574	-0.10344	-0.0378832	-0.10045	-0.0857645	0.223811744392028	0.190646436782011	0.158323794771454	0.235153435602184	0.200903537714991
573	KWMTBOMO03911	CellTypeAll-M2	turquoise	0.17643900247005	0.139101184992554	0.269932967884361	-0.0912495	-0.0359778	0.238368518973593	-0.0618167	-0.201358	0.223154903136247	-0.0799618	0.169133561225315	0.00457185147551805	-0.00569292
574	KWMTBOMO03914	CellTypeAll-M2	turquoise	0.2949210365461	0.204516905451772	0.331046037332959	0.0737345905197272	0.0973419989035421	0.323767775539592	-0.0836967	-0.125806	0.179226077774268	-0.0669006	0.146348931287257	0.00422439957625759	-0.0405265
575	KWMTBOMO03918	CellTypeAll-M12	black	0.0595355718569431	-0.0227721	-0.00729552	-0.000999841	-0.0494718	-0.0834248	0.0545458578639915	0.0457291232955756	0.0830739825758271	0.210843105761654	0.0610933026325552	0.223667572117111	0.234308452233013
576	KWMTBOMO03927	CellTypeAll-M2	turquoise	0.458752040105885	0.25180130224665	0.497725621410913	0.0369628899972805	0.0464894906534585	0.385886486122508	-0.166536	-0.225741	0.403951481078107	0.000416050636038902	0.296760673802866	0.132432636496475	0.101166782758996
577	KWMTBOMO03935	CellTypeAll-M6	yellow	-0.328676	-0.261185	-0.309852	-0.14814	0.199749774804755	-0.223711	0.892620921207895	0.25574356636515	-0.344263	-0.258231	-0.349138	-0.338891	-0.186196
578	KWMTBOMO03936	CellTypeAll-M7	green	-0.375898	-0.498541	-0.49399	0.14484646646631	0.292346574154222	-0.399864	0.645827793348543	0.642153017610653	-0.558482	-0.0329125	-0.6914	-0.264673	-0.376198
579	KWMTBOMO03937	CellTypeAll-M6	yellow	-0.146503	-0.159294	-0.0959321	-0.225245	0.0879411322322383	-0.0508675	0.665420422537997	0.0303648262867904	-0.107811	-0.251775	-0.204236	-0.252543	-0.163035
580	KWMTBOMO03939	CellTypeAll-M6	yellow	-0.281959	-0.240409	-0.261298	-0.14628	0.207738782822433	-0.178037	0.876468310777794	0.210386182796751	-0.295567	-0.2597	-0.32397	-0.318218	-0.185433
581	KWMTBOMO03940	CellTypeAll-M6	yellow	-0.332172	-0.278103	-0.336116	-0.121501	0.162882181442276	-0.263059	0.811705043611694	0.320562896457004	-0.356196	-0.192165	-0.370428	-0.304297	-0.186127
582	KWMTBOMO03951	CellTypeAll-M12	black	0.0398981401613401	0.00694471017039933	0.0235623912232958	-0.223162	-0.291561	-0.19684	-0.0522574	-0.200217	0.353626091748565	0.386683717339853	0.33920161807107	0.47665564207554	0.672883552043841
583	KWMTBOMO03961	CellTypeAll-M7	green	0.0286642216322504	-0.117808	-0.0907933	0.222467851987364	0.0744058808649747	-0.105522	-0.0426818	0.252488246277912	-0.0887655	0.231418893760657	-0.141552	0.153972053223846	0.0254318718422969
584	KWMTBOMO03963	CellTypeAll-M4	tan	0.0842575164503954	-0.0107177	0.0403363057149371	0.17067561224534	0.246780628067561	0.110138195381779	0.114817750572745	0.0990272791899694	-0.0788918	-0.0544158	-0.0895476	-0.0703313	-0.106098
585	KWMTBOMO03975	CellTypeAll-M7	green	0.0444869915438214	-0.301132	-0.206187	0.559411244990443	0.321825105998211	-0.171162	0.00907922139540974	0.558378944492888	-0.277417	0.357800748852968	-0.382144	0.183085230966076	-0.0845296
586	KWMTBOMO03978	CellTypeAll-M2	turquoise	0.205213165351131	0.108137018056645	0.230788686223313	-0.00956987	-0.00505794	0.161549561022041	-0.063273	-0.113572	0.20744133623824	0.0245478489034873	0.138709833203443	0.0897030962828716	0.0558561483836897
587	KWMTBOMO03980	CellTypeAll-M7	green	-0.120767	-0.236553	-0.238133	0.149461465762892	0.166506249811574	-0.211139	0.363202078973717	0.426278284942201	-0.274165	0.0862102611134101	-0.327929	-0.0583302	-0.113448
588	KWMTBOMO03991	CellTypeAll-M6	yellow	0.0425194930092104	-0.168443	-0.0740376	0.270729647774289	0.316058390702257	-0.000585696	0.311053956252552	0.269841632080934	-0.191088	0.0227640583789397	-0.263344	-0.0400944	-0.138672
589	KWMTBOMO03992	CellTypeAll-M6	yellow	-0.106467	-0.105193	-0.107705	-0.0446605	0.137743321944543	-0.0542896	0.536052891983269	0.110586253607747	-0.151553	-0.125225	-0.150317	-0.152665	-0.063406
590	KWMTBOMO04005	CellTypeAll-M2	turquoise	0.227745244871268	0.138833440161626	0.255941168417128	0.00410645789273045	0.0269468831360102	0.199092517474839	-0.0498271	-0.10608	0.18645841221836	-0.0210652	0.138177228338195	0.0395280688864953	0.020578742831548
591	KWMTBOMO04012	CellTypeAll-M7	green	0.0327574403698197	-0.0713754	-0.0362408	0.127713788932609	0.0695521066516267	-0.0402438	-0.0224994	0.190457467907791	-0.0683918	0.0942464324815389	-0.117379	0.0307924436745351	-0.0535351
592	KWMTBOMO04016	CellTypeAll-M6	yellow	0.0709101007629552	-0.0110353	0.0429746142127149	0.159741974832244	0.304829148056099	0.153609529148885	0.291460131899131	0.106217759409235	-0.110421	-0.131635	-0.11691	-0.14402	-0.158032
593	KWMTBOMO04026	CellTypeAll-M2	turquoise	0.291639911204278	0.224110193520852	0.376773948620147	0.00329271727741907	0.0645413691974676	0.364970724183957	-0.0851639	-0.198594	0.228075124992404	-0.122472	0.182787529174269	-0.0282875	-0.0446646
594	KWMTBOMO04027	CellTypeAll-M5	brown	0.366352585086211	0.287150113603557	0.439072773592083	0.0803854038790334	0.184836768822835	0.48401402089793	-0.0262655	-0.174016	0.200356906955438	-0.182624	0.159339344981457	-0.0822739	-0.0938946
595	KWMTBOMO04029	CellTypeAll-M5	brown	0.103427006787842	0.129019036373151	0.105048656108507	0.0674551344313511	0.117129648938214	0.207161668192574	0.0238545958632785	-0.0287583	-0.0323902	-0.102879	0.0227449179951095	-0.0922838	-0.0995665
596	KWMTBOMO04033	CellTypeAll-M2	turquoise	0.192337842372584	0.0968690788661017	0.207407598988274	-0.00460547	0.00486373514968604	0.139014830351563	-0.0499901	-0.0996787	0.195605910613207	0.030397313636911	0.13730901267934	0.0895163218731562	0.0726494610814275
597	KWMTBOMO04034	CellTypeAll-M8	blue	0.174819302685146	0.0897548640823668	0.19628168836631	-0.0915009	-0.0756522	0.086452962590076	-0.07716	-0.15082	0.275584598221018	0.0791633616107406	0.201726183845754	0.158728777654406	0.151804898330823
598	KWMTBOMO04040	CellTypeAll-M5	brown	0.237000102201549	0.315483551086906	0.290743689948542	-0.0197803	0.0516479139884474	0.359979722997812	-0.00649357	-0.162449	0.098766441242374	-0.156911	0.176346024381547	-0.0919982	-0.0446162
599	KWMTBOMO04047	CellTypeAll-M7	green	0.0224076888521472	-0.317987	-0.237941	0.587466380593471	0.299892782476819	-0.194217	-0.085642	0.650708495457625	-0.346394	0.339241062077418	-0.461184	0.130123628605049	-0.161737
600	KWMTBOMO04049	CellTypeAll-M8	blue	0.125899047784805	0.0348831866109357	0.154959105693985	-0.117183	-0.0997854	0.0524581610164891	-0.0909291	-0.207957	0.316561529826143	0.0878175004302634	0.240721759375171	0.16278964747139	0.170193429346543
601	KWMTBOMO04057	CellTypeAll-M7	green	0.0844904335246785	-0.0998544	-0.152057	0.546487151439622	0.246794219432888	-0.0542344	-0.131444	0.554685544736331	-0.372952	0.223281298721417	-0.34524	0.0451015455854669	-0.145418
602	KWMTBOMO04061	CellTypeAll-M3	red	0.141236302102063	-0.152814	-0.0317214	0.431496019567848	0.246943371117499	-0.0220928	-0.0646452	0.354374182072968	-0.150343	0.198194973094667	-0.237706	0.112320687984852	-0.0656706
603	KWMTBOMO04062	CellTypeAll-M7	green	-0.0100155	-0.279445	-0.225526	0.417680116789139	0.2034184167032	-0.214337	-0.00838953	0.5703178663654	-0.293709	0.330372324684932	-0.402639	0.15344730403365	-0.0797888
604	KWMTBOMO04064	CellTypeAll-M7	green	0.0369690261122337	-0.12775	-0.101735	0.270742011406852	0.0934248776187674	-0.104175	-0.0555234	0.306754807107471	-0.129044	0.241542720559966	-0.184183	0.156364697376609	0.0151227402492079
605	KWMTBOMO04068	CellTypeAll-M3	red	0.236837044742658	0.0111452634183458	0.188969687994894	0.346259147103826	0.325630616171402	0.253310006928417	-0.0501711	0.11171302445423	-0.00759304	-0.0250171	-0.084732	-0.0290135	-0.161367
606	KWMTBOMO04076	CellTypeAll-M8	blue	0.117007378115963	0.0243408465552611	0.111875602590526	-0.0430243	-0.0584259	0.0216679876253424	-0.0651384	-0.0874151	0.196317117780037	0.118180506034859	0.133035857791798	0.17016393146797	0.141050586537006
607	KWMTBOMO04102	CellTypeAll-M6	yellow	0.101908231998058	0.0224334236232835	0.119576753634417	0.0200398018725271	0.164445026122623	0.181288009928725	0.181171203649142	-0.046714	0.0367601962325776	-0.126072	-0.0203394	-0.0945498	-0.123119
608	KWMTBOMO04129	CellTypeAll-M8	blue	0.280115711454976	0.178363246490603	0.320140786598317	-0.0486592	-0.0406079	0.213318751953508	-0.118708	-0.187916	0.322575342230951	0.040960922470851	0.243192209618496	0.14037522902396	0.123162537199621
609	KWMTBOMO04131	CellTypeAll-M1	greenyellow	0.242796612093261	0.496696827608873	0.345366902005216	-0.169633	-0.120606	0.386660727187185	-0.112459	-0.306569	0.165678682246506	-0.18657	0.324628504216921	-0.0864542	0.0307267868957703
610	KWMTBOMO04132	CellTypeAll-M2	turquoise	0.190742897484084	0.138373634354697	0.218355120241015	0.0367909333280392	0.0509011710575155	0.19928618772213	-0.0578229	-0.0788413	0.123938433082285	-0.0362723	0.104816484907768	0.00785102901497114	-0.00189854
611	KWMTBOMO04133	CellTypeAll-M2	turquoise	0.225434099072648	0.157251748379601	0.256695402251081	-0.00369087	0.0147147120906088	0.190738942742471	-0.0596955	-0.114668	0.191988626002935	-0.0125544	0.146426112770387	0.052596325725362	0.0489674331147919
612	KWMTBOMO04144	CellTypeAll-M2	turquoise	0.346932807749319	0.231010284771105	0.392334931508697	0.0369439619312772	0.0474835337732627	0.325555690280115	-0.101665	-0.178887	0.297123246508958	0.0175866064367056	0.235680042808666	0.120190173403769	0.0882911829215563
613	KWMTBOMO04151	CellTypeAll-M8	blue	0.290041018512919	0.199885371317867	0.348266891432251	-0.0655364	-0.0438516	0.23297495032455	-0.128118	-0.209973	0.344568733326081	0.0215163515807581	0.257211872226221	0.132292741166977	0.125873097367219
614	KWMTBOMO04168	CellTypeAll-M9	pink	0.10856745613441	-0.0270582	-0.0109589	0.113302454631957	-0.0484336	-0.120902	-0.121228	0.126278706539821	0.102753730905593	0.40213322277103	0.0498059522402424	0.367267855249804	0.293236503521511
615	KWMTBOMO04179	CellTypeAll-M1	greenyellow	0.197568735021082	0.491223699777106	0.260099380979367	-0.1481	-0.140294	0.299596970826252	-0.117435	-0.241855	0.0957096621451273	-0.128551	0.291572728414832	-0.054377	0.0875031232624675
616	KWMTBOMO04181	CellTypeAll-M7	green	0.0695036856023589	-0.140357	-0.0773436	0.226893031781916	0.0617637006816187	-0.128373	-0.0446979	0.255959542998493	-0.0310416	0.302200490518356	-0.104743	0.229294151581353	0.0933786149127444
617	KWMTBOMO04189	CellTypeAll-M7	green	-0.0655601	-0.192858	-0.190064	0.178254482323709	0.0631751857801525	-0.19191	-0.0576396	0.387024228417127	-0.200014	0.175586389450674	-0.277073	0.0159151761955679	-0.13571
618	KWMTBOMO04197	CellTypeAll-M6	yellow	0.0681689347424341	-0.0139326	0.0378945568119901	0.0685484251173767	0.170745139485103	0.0700091431130848	0.221174648076139	0.0550520447213796	-0.0239415	-0.047683	-0.0490272	-0.0437968	-0.0456391
619	KWMTBOMO04249	CellTypeAll-M3	red	0.158016768835959	-0.123005	0.0132937851500135	0.465360443316897	0.371879345404219	0.0924392544237069	-0.0491594	0.292949620303217	-0.16932	0.0661956401777108	-0.229487	-0.00486128	-0.17562
620	KWMTBOMO04265	CellTypeAll-M2	turquoise	0.181654680471761	0.185545	0.241883645257882	-0.0028686	0.0335092967131245	0.253074601912432	-0.0597895	-0.126227	0.123430000794439	-0.0910703	0.127184168199507	-0.035985	-0.0317408
621	KWMTBOMO04266	CellTypeAll-M8	blue	0.32070760312547	0.196000628865236	0.378981471353224	-0.0961344	-0.0692204	0.240897522857808	-0.120328	-0.231673	0.400698374779224	0.0361499479034016	0.280424187604777	0.15943897481283	0.147318910997769
622	KWMTBOMO04267	CellTypeAll-M2	turquoise	0.308208200991705	0.257746738415638	0.371723685107102	-0.0314406	-0.00141585	0.28480342356534	-0.0940318	-0.180028	0.264951350569519	-0.0501808	0.2196610825703	0.0464251666138547	0.0685374742462376
623	KWMTBOMO04274	CellTypeAll-M3	red	0.149207243576891	-0.0664014	-0.0317344	0.562695183434576	0.316329250908282	0.0454824975481799	-0.0910747	0.407738014298477	-0.236524	0.155494726896561	-0.228197	0.0528713590108506	-0.110451
624	KWMTBOMO04296	CellTypeAll-M2	turquoise	0.243901324621228	0.207263775932973	0.314500062954953	-0.0501702	-0.0182212	0.253138048461114	-0.0860307	-0.180459	0.247976422785299	-0.0388371	0.206897732972707	0.0476768353628493	0.0589130115440492
625	KWMTBOMO04298	CellTypeAll-M2	turquoise	0.226293553529766	0.162111780814165	0.239465394067663	0.0330335738349233	0.0360120048164998	0.19309952097133	-0.0707842	-0.0829466	0.151719645829834	-0.00891013	0.133713697491492	0.0482773351164615	0.0430976973717639
626	KWMTBOMO04313	CellTypeAll-M2	turquoise	0.196524570191301	0.164705088072468	0.249063538204607	-0.0264677	0.010241796213707	0.217330385777409	-0.0508455	-0.139706	0.176919973252001	-0.0552787	0.150390309710903	0.0103295507986138	0.0147685228212092
627	KWMTBOMO04315	CellTypeAll-M3	red	0.188152942306467	-0.0138976	0.0771843668883876	0.381615872054949	0.322951177367884	0.168905918085294	0.0505780513716247	0.206922289021028	-0.131613	-0.0175673	-0.138662	-0.0503447	-0.142876
628	KWMTBOMO04324	CellTypeAll-M8	blue	0.184641817262806	0.116225589198713	0.216847245144962	-0.051359	-0.0373031	0.125327209321614	-0.089861	-0.150827	0.264338818353135	0.0640010637496812	0.199047700635159	0.139105492102395	0.136322800169545
629	KWMTBOMO04325	CellTypeAll-M5	brown	0.295557041816138	0.309604507257878	0.340215718378483	0.0711481398694428	0.101851222734785	0.409094183705302	-0.0864759	-0.141646	0.117108719730619	-0.135481	0.163174082188806	-0.0685201	-0.0628483
630	KWMTBOMO04332	CellTypeAll-M2	turquoise	0.17532013562044	0.126993994012159	0.181354760847529	0.0179589520607282	0.021245235563789	0.151393420847051	-0.0428689	-0.0677096	0.121962017215961	-0.00378645	0.106913005467429	0.0382884507038404	0.0333519897000622
631	KWMTBOMO04339	CellTypeAll-M1	greenyellow	0.209734843976025	0.422398535023616	0.276076915677615	-0.0892401	-0.0896693	0.308983365526116	-0.121907	-0.21865	0.129956506732475	-0.119362	0.255389340630563	-0.0475613	0.0549198641614897
632	KWMTBOMO04344	CellTypeAll-M10	purple	0.267164296945397	0.266691060512938	0.275511790149831	0.0673091022361769	0.0245002831035204	0.261922676925991	-0.106872	-0.105842	0.165335440432519	0.00818304945950005	0.233363574849305	0.0654233867973974	0.0934211800348737
633	KWMTBOMO04346	CellTypeAll-M7	green	0.0396440174221518	-0.0718536	-0.0353811	0.10755387152418	0.0665021312827677	-0.0488754	0.025729639112887	0.186558318046231	-0.0616485	0.0999617501270575	-0.110111	0.0507892545757107	-0.00829782
634	KWMTBOMO04356	CellTypeAll-M6	yellow	-0.266277	-0.209042	-0.230396	-0.151276	0.217610639512791	-0.14436	0.910500740078897	0.155656	-0.276128	-0.278682	-0.27733	-0.317637	-0.145626
635	KWMTBOMO04386	CellTypeAll-M2	turquoise	0.170411461844782	0.11544246657554	0.242757631799316	-0.100465	-0.0165846	0.183205010654454	0.0239608853837726	-0.186284	0.229760916394416	-0.0666257	0.163130599108761	0.01694170061132	0.0315551506586042
636	KWMTBOMO04413	CellTypeAll-M2	turquoise	0.226778837953627	0.128401872038631	0.256941233746322	0.0184862717704071	0.0288168118046847	0.182597969474785	-0.0728949	-0.0935124	0.19157268332725	-0.00245107	0.130044018439058	0.0601324031735496	0.0371800463422566
637	KWMTBOMO04424	CellTypeAll-M2	turquoise	0.207198158621584	0.138570934047535	0.232980198440932	-0.0285685	-0.0244964	0.147774919097341	-0.0762053	-0.122009	0.215794639047533	0.0258311373483035	0.167911166000633	0.0996431783908075	0.0948023231288447
638	KWMTBOMO04429	CellTypeAll-M3	red	0.0739417772568653	-0.0723973	-0.00593472	0.25370160634886	0.247946141199584	0.0513017418361015	0.0773794980321671	0.166533706176571	-0.106355	0.0115093090435432	-0.140812	-0.0278947	-0.10706
639	KWMTBOMO04436	CellTypeAll-M8	blue	0.294411105737206	0.133803910214721	0.308619312592222	-0.0514353	-0.0669213	0.159102050049319	-0.137883	-0.140913	0.355900395466601	0.101235747568275	0.220940343364579	0.193370576663075	0.156163390189839
640	KWMTBOMO04438	CellTypeAll-M2	turquoise	0.243782296431373	0.132688695391621	0.265161967269136	0.00489815615135	0.00750992251218462	0.173127748547992	-0.0902227	-0.104395	0.223468602314418	0.0295781986024988	0.155479067933886	0.0931881611715023	0.0647403239239221
641	KWMTBOMO04458	CellTypeAll-M2	turquoise	0.280176849201727	0.220541897782816	0.334183753885892	-0.00524117	0.0199163881136267	0.268618552538905	-0.0972081	-0.158888	0.243822327134018	-0.0245572	0.200511708439463	0.0622063747660131	0.0586064459938129
642	KWMTBOMO04479	CellTypeAll-M9	pink	0.051700806763072	-0.0828797	-0.0600672	0.0932171294692133	-0.0447575	-0.145361	-0.0665432	0.136243686232731	0.0623941991955603	0.347003924724687	0.0141849597564672	0.289113789298998	0.214751853655964
643	KWMTBOMO04480	CellTypeAll-M5	brown	0.192914328279057	0.190375213247639	0.21244891282027	0.0738550980560483	0.113816791166598	0.276749931859559	-0.0138871	-0.0614205	0.0422798365888926	-0.105444	0.0790887262300383	-0.067573	-0.0664294
644	KWMTBOMO04489	CellTypeAll-M3	red	0.0434515852295828	-0.0555607	-0.0683821	0.205967756595435	0.0750802063181837	-0.0566477	0.00468872758083566	0.213191394665311	-0.102298	0.162436958604232	-0.104935	0.0959176207840598	0.0202336797001206
645	KWMTBOMO04497	CellTypeAll-M2	turquoise	0.285343908691907	0.181975801156977	0.303621421617492	0.0593224513111711	0.0842594328415842	0.269575270824571	-0.0618643	-0.0989946	0.174329282164059	-0.0417487	0.138152727830379	0.0217806028713137	-0.000412028
646	KWMTBOMO04507	CellTypeAll-M2	turquoise	0.233735469380744	0.182122076556432	0.262020524208734	0.0213535618030114	0.0461093014078234	0.24236250042425	-0.0561994	-0.112541	0.14839875225794	-0.0565926	0.130942938833492	0.00336199260926481	-0.00402546
647	KWMTBOMO04510	CellTypeAll-M8	blue	0.130011541882601	0.0659597592123937	0.141066654910073	-0.0532439	-0.0544172	0.0589691929220139	-0.0677909	-0.0896472	0.203476831314154	0.0888173998901498	0.141898110103097	0.13709697804924	0.121729796468617
648	KWMTBOMO04511	CellTypeAll-M2	turquoise	0.132939987296798	0.110122716623594	0.164622819313944	-0.048283	-0.0378691	0.103444616551804	-0.0668511	-0.119107	0.18111931193161	0.0325169564705109	0.151054737602851	0.0895285605372365	0.100663259214642
649	KWMTBOMO04513	CellTypeAll-M8	blue	0.246961643011344	0.134001026945839	0.282295415130671	-0.0815136	-0.0780719	0.148104538994046	-0.122975	-0.18412	0.341008386582542	0.0819192833751674	0.244204152061138	0.178304945718312	0.15943844763907
650	KWMTBOMO04514	CellTypeAll-M6	yellow	0.0980409326265353	0.0595351668889782	0.0731363578843469	0.111720681312192	0.242740789123575	0.179483785392571	0.211646005379448	0.0534569887566693	-0.0862615	-0.127868	-0.0564049	-0.130663	-0.138823
651	KWMTBOMO04518	CellTypeAll-M6	yellow	0.0728529299911503	0.061011256905471	0.0893398421715468	-0.0716303	0.047664544826819	0.106912003183835	0.27358035400569	-0.0448577	0.0398701565623721	-0.0796634	0.0331169015603451	-0.0523965	0.0135491871937056
652	KWMTBOMO04522	CellTypeAll-M6	yellow	0.175492390303375	0.0826532664433855	0.167581072944985	0.136629246867678	0.244005648886177	0.248806820995268	0.127919882227525	0.00395507335407299	-0.00442098	-0.126699	-0.0191983	-0.103049	-0.12576
653	KWMTBOMO04526	CellTypeAll-M6	yellow	-0.0742711	-0.116846	-0.122985	0.0460261684711717	0.116888552020921	-0.0862045	0.282347229017542	0.202625246064011	-0.14605	0.00650455499558982	-0.170222	-0.0582203	-0.0626052
654	KWMTBOMO04529	CellTypeAll-M10	purple	0.273896721377958	0.231078734310297	0.260873978261735	0.0573685838556825	0.0368356803277863	0.231416330478006	-0.0514223	-0.079657	0.184980494347102	0.0810263397606952	0.208000527772593	0.132475253900568	0.134357285233577
655	KWMTBOMO04530	CellTypeAll-M2	turquoise	0.334754032200307	0.28217500101595	0.3755373970989	-0.064404	-0.0520735	0.256069067964361	-0.0980967	-0.190811	0.316942448047273	0.0128417950803201	0.271064792027543	0.124952616157136	0.159674205090386
656	KWMTBOMO04534	CellTypeAll-M12	black	0.0689534034699729	-0.0193585	-0.0244512	0.0132722078842385	-0.0772208	-0.112874	-0.0120251	0.081454104806134	0.0735992586641521	0.282849979700507	0.0554077722160836	0.274629390161142	0.26857839823525
657	KWMTBOMO04541	CellTypeAll-M10	purple	0.243072736564948	0.246703705864836	0.225023633032782	-0.0448987	-0.107351	0.146173736551307	-0.129287	-0.138537	0.213956593007408	0.108303001701714	0.282974458968868	0.17571818786925	0.199037287444711
658	KWMTBOMO04546	CellTypeAll-M2	turquoise	0.242277729375945	0.164058109594192	0.281661592419262	0.0154757222986059	0.0529441837757554	0.237979693136265	-0.0407337	-0.119849	0.199159660162418	-0.0177094	0.149776853860105	0.0499897193561384	0.0303395197518952
659	KWMTBOMO04554	CellTypeAll-M5	brown	0.198230683306494	0.179316987587564	0.196190107632134	0.0783520402352647	0.0950273144313591	0.246483206376998	-0.0212991	-0.0536461	0.0493258047925058	-0.0722474	0.0799329762142016	-0.0412015	-0.0429372
660	KWMTBOMO04555	CellTypeAll-M2	turquoise	0.351002559420498	0.231484866088121	0.379535152627705	0.0295789360408904	0.0950331074197351	0.320114754928698	0.00604764582363869	-0.150815	0.244909809389342	-0.0625014	0.193255506334717	0.0316667340519543	0.0385860961327513
661	KWMTBOMO04567	CellTypeAll-M5	brown	0.274456303190931	0.334363417230382	0.332551338781161	0.000923610144322561	0.0800509254418658	0.419247262835152	-0.0287952	-0.184906	0.117366268711302	-0.176673	0.186037810899465	-0.102547	-0.0759699
662	KWMTBOMO04577	CellTypeAll-M4	tan	0.0924563580251754	-0.0405696	0.036231989554925	0.199456926574761	0.276027388281862	0.104069110849828	0.0955263965678924	0.116106616339508	-0.073895	-0.03063	-0.111494	-0.0486222	-0.115051
663	KWMTBOMO04584	CellTypeAll-M12	black	0.169313073894364	0.229678374793938	0.204514477700237	-0.232126	-0.271235	0.0178295267060205	-0.126856	-0.318616	0.423656275681115	0.219950804803085	0.473846084049311	0.352251948579522	0.516259258142744
664	KWMTBOMO04593	CellTypeAll-M2	turquoise	0.237325666238573	0.112961634458874	0.239785567339307	0.0269118574440816	0.0193939128565167	0.15229417635616	-0.0750854	-0.0685777	0.211870315036997	0.0685405997370038	0.143375214420093	0.126369961641218	0.0905245118649909
665	KWMTBOMO04594	CellTypeAll-M10	purple	0.211950863801661	0.185536519481175	0.168953775429771	-0.0787565	-0.13246	0.0524795993067132	-0.0818068	-0.13904	0.268511445324243	0.224658030248997	0.320171378114681	0.296911806855153	0.366094767817084
666	KWMTBOMO04605	CellTypeAll-M7	green	0.0599013081706856	-0.219724	-0.165297	0.457167044489665	0.18505818894245	-0.182428	-0.159727	0.507152498631959	-0.193657	0.429190204363609	-0.298098	0.273711571819964	0.0108253944189764
667	KWMTBOMO04615	CellTypeAll-M8	blue	0.13170874719959	-0.00389412	0.0931683049157204	-0.0182504	-0.0672333	-0.0200694	-0.0995515	-0.0542239	0.231536596238428	0.213232445411515	0.142831234653488	0.256385331027479	0.20354878614628
668	KWMTBOMO04616	CellTypeAll-M8	blue	0.286279627080733	0.173765373876292	0.330629958816027	-0.0944619	-0.0787647	0.187118942159209	-0.118161	-0.215769	0.380885738122665	0.0667576219941019	0.27417483752844	0.184056350819815	0.173168999326778
669	KWMTBOMO04618	CellTypeAll-M8	blue	0.192150896750973	0.107413582650158	0.216364392409737	-0.0683885	-0.0656856	0.109308951799733	-0.0833995	-0.127333	0.26001217277741	0.0669771862655952	0.178224469483513	0.137390689734216	0.126189892597884
670	KWMTBOMO04621	CellTypeAll-M8	blue	0.227681822738048	0.142980975381622	0.281132800292566	-0.078738	-0.0526247	0.182832536757687	-0.0946752	-0.184062	0.29775525106633	0.0151184178763167	0.212047421728496	0.105933627968683	0.0922924919808303
671	KWMTBOMO04632	CellTypeAll-M5	brown	0.232787658094895	0.333232065901083	0.272538077107915	0.00510975154560681	0.0725338428409391	0.365740590960072	-0.0209399	-0.142924	0.0632725504559396	-0.153398	0.164401221980526	-0.0979156	-0.0454101
672	KWMTBOMO04648	CellTypeAll-M2	turquoise	0.197147921571129	0.130309332899532	0.197317946806042	0.0323615273804302	0.0336665028023548	0.165568566794183	-0.0336188	-0.0615426	0.123965102620082	-0.00229719	0.106619562836632	0.0409959724660667	0.0340622977857812
673	KWMTBOMO04650	CellTypeAll-M7	green	-0.236126	-0.573309	-0.527442	0.639244569493723	0.418001719488783	-0.416422	0.0835101569382294	0.89369166114757	-0.641891	0.274503781616463	-0.77552	-0.0347455	-0.372176
674	KWMTBOMO04652	CellTypeAll-M9	pink	0.00295629333206044	-0.123969	-0.102867	0.0269931677493113	-0.100912	-0.21846	-0.0659426	0.126058904670703	0.0825970883508326	0.393821392723917	0.0257572034885396	0.340117879727154	0.277103744141271
675	KWMTBOMO04654	CellTypeAll-M7	green	-0.000446824	0.0393315855612917	-0.16169	0.128734418723358	-0.0312765	-0.112318	-0.0372744	0.344323206124622	-0.269368	0.158544328952709	-0.164231	0.0310063912168941	0.0180039195165147
676	KWMTBOMO04663	CellTypeAll-M1	greenyellow	0.252428668720634	0.405344043412017	0.295492447424332	-0.0795689	-0.0487836	0.307894470536315	-0.042583	-0.192544	0.141394095658816	-0.103818	0.261127340762003	-0.0255128	0.0774702373083687
677	KWMTBOMO04667	CellTypeAll-M5	brown	0.195249338542094	0.215056610815898	0.20660184544283	0.0833318393826835	0.133659774322882	0.307332373339451	-0.00593869	-0.0667618	0.0150158828744361	-0.127497	0.0778930332136796	-0.0969272	-0.102857
678	KWMTBOMO04676	CellTypeAll-M2	turquoise	0.330318492472762	0.345755549746799	0.427540919891474	-0.0543776	0.0263589599432169	0.434837923089967	-0.0625828	-0.253531	0.244047974482243	-0.161458	0.256388980874256	-0.0478627	-0.017039
679	KWMTBOMO04679	CellTypeAll-M2	turquoise	0.25207881353074	0.168373271549025	0.310550891161137	-0.0522105	-0.0283685	0.208259660328793	-0.0843707	-0.160744	0.26487333603342	-0.0194568	0.192636949194021	0.0696602155893682	0.0715312384008846
680	KWMTBOMO04682	CellTypeAll-M3	red	0.178274269421458	-0.146641	0.0139575639412562	0.519560336687633	0.374824802986925	0.074529712077195	-0.0668391	0.32121226131292	-0.175304	0.0839669392966421	-0.249877	0.005081250655267	-0.173965
681	KWMTBOMO04683	CellTypeAll-M7	green	0.0674878887420355	-0.316677	-0.182106	0.698912143967511	0.464069617312324	-0.0738348	-0.155403	0.627075992555786	-0.400388	0.192014320103876	-0.515481	-0.00275976	-0.316846
682	KWMTBOMO04684	CellTypeAll-M7	green	0.0505719475984077	-0.0876941	-0.032724	0.184270640585257	0.147246093503195	-0.0105463	-0.00941792	0.216439978004689	-0.111338	0.0322229939776931	-0.163441	-0.0229998	-0.113549
683	KWMTBOMO04687	CellTypeAll-M2	turquoise	0.302587042494626	0.265881972167907	0.396353031409377	-0.0484718	0.00901417577070847	0.397718133869724	-0.0899306	-0.24482	0.244896642194852	-0.135469	0.227344590688201	-0.0298886	-0.0457872
684	KWMTBOMO04691	CellTypeAll-M9	pink	0.0223929223105205	-0.0971139	-0.0645141	0.084427386861854	-0.0155305	-0.122285	-0.0398589	0.141327073802313	0.0144597648976727	0.258660522693147	-0.0435894	0.205821452317003	0.122467495616277
685	KWMTBOMO04710	CellTypeAll-M2	turquoise	0.210499971902354	0.142873589808305	0.229388282446341	0.0359767439904072	0.033018183277279	0.184468198627042	-0.0866818	-0.0827701	0.15559331921418	0.00562609164225661	0.131487273000347	0.0588311929452569	0.0401671646807606
686	KWMTBOMO04712	CellTypeAll-M11	magenta	0.127322752177982	-0.013989	0.0667488892377215	-0.00624804	-0.0689117	-0.047629	-0.080421	0.00262309457051233	0.184273665396032	0.233607559308603	0.105612441347891	0.282956797725521	0.201841351137328
687	KWMTBOMO04715	CellTypeAll-M1	greenyellow	0.125363245132195	0.269688890177119	0.112948384165315	0.0285327893621944	0.0260891488975931	0.214671584477356	-0.0470824	-0.0612707	-0.0564849	-0.0892637	0.102281555703051	-0.0839857	-0.0555231
688	KWMTBOMO04737	CellTypeAll-M2	turquoise	0.329833661495344	0.389984761444511	0.480356804290572	-0.227292	-0.168258	0.386938768095684	-0.163354	-0.40777	0.402187738665701	-0.114194	0.413666750583782	0.0463236201758181	0.105671254961435
689	KWMTBOMO04742	CellTypeAll-M12	black	0.0699568500183746	0.0243387144504194	0.0590447673875288	-0.210645	-0.243775	-0.153338	0.0110281018305874	-0.213514	0.367109709654459	0.35717382380249	0.350139211392732	0.461970894368998	0.658096767847896
690	KWMTBOMO04745	CellTypeAll-M4	tan	0.0843298687043152	-0.118583	-0.024231	0.249459427027754	0.285478176573347	0.0124170694828305	0.170341588057736	0.257833931722318	-0.117382	0.0852085056766435	-0.194702	0.0224321855563092	-0.080479
691	KWMTBOMO04756	CellTypeAll-M2	turquoise	0.300856378731784	0.225857634682978	0.361266213274825	0.0065076086408068	0.0600695645976196	0.314666764581478	-0.0431586	-0.166984	0.240591512405049	-0.073328	0.187386610700316	0.0169054182779382	0.0248298263941495
692	KWMTBOMO04757	CellTypeAll-M1	greenyellow	0.193414269654451	0.562475726124055	0.308991404047578	-0.20558	-0.125382	0.435234856289597	-0.0825194	-0.335184	0.0917640579451005	-0.246863	0.321308952656336	-0.157808	-0.0278942
693	KWMTBOMO04762	CellTypeAll-M8	blue	0.191761416214677	0.0927285710664581	0.197629903789204	-0.0362926	-0.0467545	0.0951315010939833	-0.0786177	-0.103163	0.252603930792089	0.103096636580437	0.170465963243641	0.167395454992265	0.148938694673933
694	KWMTBOMO04768	CellTypeAll-M2	turquoise	0.204764707782109	0.135808494838807	0.238210031179243	-0.0513868	-0.0340243	0.139996883775415	-0.0404094	-0.139057	0.25950270534699	0.0598961888615553	0.20114530616604	0.13496579452923	0.135373607137848
695	KWMTBOMO04769	CellTypeAll-M8	blue	0.421616211008449	0.208848361225424	0.508494483928485	-0.0825058	-0.0577685	0.33101909016977	-0.208962	-0.29185	0.508157956858522	0.0206257561359163	0.314739815120309	0.181462889529591	0.126307679905851
696	KWMTBOMO04771	CellTypeAll-M6	yellow	0.103503435157577	0.0763782043051578	0.164878750097738	-0.12004	0.0752958902998812	0.183086051244469	0.247727214254145	-0.159773	0.115999831391679	-0.152037	0.0567691955069586	-0.0780038	-0.0543623
697	KWMTBOMO04775	CellTypeAll-M2	turquoise	0.212961382474608	0.137295424025353	0.221415132247631	0.0342265946015932	0.0480935871963045	0.192465881176947	-0.0481741	-0.0813922	0.146179668796946	-0.00101919	0.125638776909135	0.0484513047280655	0.0264445452159221
698	KWMTBOMO04776	CellTypeAll-M11	magenta	0.0373759401723776	-0.0498315	0.00218432864310818	-0.0170872	-0.065764	-0.0724507	-0.0816064	-0.0105573	0.126185685192477	0.183459817965972	0.0749133901244701	0.213673377938804	0.141273892590927
699	KWMTBOMO04778	CellTypeAll-M5	brown	0.18374458135872	0.339891751002457	0.25419699507121	-0.06325	-0.0156657	0.314123712780826	-0.0596267	-0.177508	0.101230456309337	-0.135753	0.186413236531252	-0.0731302	0.0125645986248285
700	KWMTBOMO04783	CellTypeAll-M9	pink	0.0799468829493281	-0.0932922	-0.0198549	0.06088321996709	-0.0808915	-0.149812	-0.147521	0.0695916224110004	0.164105701356625	0.404815154297381	0.0786226789976861	0.376310417462957	0.276822969632925
701	KWMTBOMO04786	CellTypeAll-M1	greenyellow	0.173771366314767	0.256458498765039	0.175067413936016	0.021508855591708	0.0306166776428705	0.248311290396957	-0.0402772	-0.0912194	0.0165064011182738	-0.098791	0.120647500475251	-0.067263	-0.0417225
702	KWMTBOMO04788	CellTypeAll-M5	brown	0.203779590296306	0.331680749550132	0.219544222959482	0.0336627416757394	0.0570352697457771	0.359382764824224	-0.0563565	-0.12967	-0.0135928	-0.168614	0.143205115870833	-0.131727	-0.0988174
703	KWMTBOMO04789	CellTypeAll-M8	blue	0.248655724097674	0.102837806278315	0.286788565313972	-0.129662	-0.156644	0.0950201446480464	-0.205701	-0.227355	0.449518335087121	0.200229951479263	0.30767720407783	0.313113168945113	0.268865396312713
704	KWMTBOMO04790	CellTypeAll-M8	blue	0.237224633417094	0.161343514264555	0.279833525688189	-0.0835449	-0.0707825	0.163322797583348	-0.102862	-0.179436	0.314197050452978	0.0477127778704579	0.229428791254126	0.14464059997536	0.142003495102153
705	KWMTBOMO04801	CellTypeAll-M2	turquoise	0.193275954890932	0.105247552998649	0.272968968315529	-0.0233704	0.0182938307429429	0.265683375743798	-0.07224	-0.180581	0.20104841261539	-0.0976968	0.123890069809648	-0.0211043	-0.0658643
706	KWMTBOMO04802	CellTypeAll-M8	blue	0.271474667167192	0.186274045052973	0.33509623954025	-0.0978262	-0.0716502	0.217823732523271	-0.109128	-0.227646	0.351977257029602	0.0168127033495101	0.263703372952022	0.12791445911498	0.132637419661842
707	KWMTBOMO04804	CellTypeAll-M6	yellow	0.134964155486414	0.0268141421602669	0.0907637765765086	0.200137727937377	0.294425949745004	0.200502809923128	0.155660886841812	0.0836343824410752	-0.0851265	-0.110212	-0.0929081	-0.115847	-0.168032
708	KWMTBOMO04815	CellTypeAll-M5	brown	0.284185532675198	0.402979970168248	0.340869041050869	-0.000391548	0.056336675814546	0.430140202602897	-0.0817255	-0.193293	0.110892028407938	-0.176036	0.213276526844717	-0.103803	-0.0500334
709	KWMTBOMO04821	CellTypeAll-M8	blue	0.078821497932485	0.0016400523479631	0.0674944095528726	-0.0622429	-0.0848345	-0.0226833	-0.0766495	-0.102641	0.207513813386525	0.156420975196047	0.15959468037139	0.204029393065816	0.187212497790401
710	KWMTBOMO04823	CellTypeAll-M3	red	0.284580464629576	0.0225706486882524	0.214011959309461	0.512251135325196	0.439053543490478	0.286617796924631	-0.1192	0.218925881560016	-0.0536378	0.0266393492679998	-0.138643	-0.00667714	-0.20334
711	KWMTBOMO04826	CellTypeAll-M2	turquoise	0.23649382457057	0.167321003726889	0.255368658568412	0.0361175688724465	0.0555171904619669	0.224553132324536	-0.0514576	-0.100982	0.153358030249182	-0.0377456	0.133811055561593	0.0210651481889147	0.01354368501477
712	KWMTBOMO04859	CellTypeAll-M3	red	0.13072900769907	-0.137537	-0.0440177	0.501382455640328	0.258420135805949	0.0350046563989025	-0.0839156	0.314786357460332	-0.191883	0.102724051918228	-0.224413	0.0267032133785081	-0.119131
713	KWMTBOMO04867	CellTypeAll-M2	turquoise	0.255268081150171	0.261696227031457	0.336586346504416	-0.0667201	-0.0276319	0.277030243741976	-0.0900667	-0.19619	0.236236563036298	-0.0641692	0.219033482263621	0.0263460869656839	0.0566870872131515
714	KWMTBOMO04868	CellTypeAll-M10	purple	0.195159118935036	0.349970989002096	0.237407426790371	-0.136633	-0.140297	0.180433284339299	-0.102597	-0.202907	0.172635157412508	-0.037303	0.293965746072959	0.0506660412669565	0.158295116786573
715	KWMTBOMO04877	CellTypeAll-M1	greenyellow	0.178977378676667	0.340865970864696	0.222866289156383	-0.0329762	-0.0159191	0.27731072755751	-0.0718516	-0.142668	0.0557072734960161	-0.120117	0.180960376726154	-0.0726729	-0.00573855
716	KWMTBOMO04914	CellTypeAll-M7	green	0.042232033468153	-0.160164	-0.128242	0.247319775091797	0.0726810862785297	-0.164146	-0.0334593	0.347957319291855	-0.11593	0.32073042478895	-0.194804	0.22550972662737	0.0760481138247601
717	KWMTBOMO04924	CellTypeAll-M5	brown	0.0929361678672958	0.191622179761788	0.129332538717585	0.00262308356351505	0.11916872709491	0.265434523789815	0.10550314793227	-0.0793312	-0.0375125	-0.19427	0.0468888502204513	-0.168886	-0.144575
718	KWMTBOMO04937	CellTypeAll-M5	brown	0.238770683267292	0.149333580954165	0.22521551778036	0.16309519759188	0.189096838398996	0.295094900208672	-0.0207901	-0.018644	0.0365361581858097	-0.0816963	0.0394175882947591	-0.0495235	-0.0881592
719	KWMTBOMO04968	CellTypeAll-M8	blue	0.26876111717254	0.1888781539758	0.324080110028681	-0.0877816	-0.0612716	0.203657518477798	-0.10782	-0.205355	0.341113805657276	0.0245694855210459	0.251401510515711	0.132397463637745	0.137648318822782
720	KWMTBOMO04976	CellTypeAll-M8	blue	0.176285905484715	0.0597947728359513	0.195044362872458	-0.174752	-0.198286	0.00321724619061795	-0.165647	-0.240665	0.43304655670844	0.229818512803152	0.32695314136971	0.344118067781719	0.343912168294727
721	KWMTBOMO04987	CellTypeAll-M3	red	0.179887019739786	-0.000853714	0.114157507767107	0.284803669169833	0.253360097591243	0.162064877936143	-0.0265705	0.117613615594064	-0.0373735	-0.00202091	-0.0842095	-0.0136287	-0.112496
722	KWMTBOMO04991	CellTypeAll-M11	magenta	0.0269154751778034	-0.0744958	-0.03457	0.0306024257783035	-0.0571982	-0.108864	-0.095802	0.0401361642945844	0.0981671912457196	0.237880264374426	0.0501656877568829	0.24830856001209	0.157427877984321
723	KWMTBOMO04992	CellTypeAll-M9	pink	0.0871826171356864	-0.135471	-0.0210762	0.0924727351561696	-0.0700145	-0.154524	-0.200416	0.153259350455636	0.140314635828212	0.383229214245291	0.00781958167584191	0.318520612310151	0.170110669519327
724	KWMTBOMO04995	CellTypeAll-M5	brown	0.260587785322297	0.363970714805029	0.33201204540357	0.0307862658045476	0.0648974138049098	0.478650881271876	-0.131906	-0.213535	0.0794052541619222	-0.218908	0.192139830185728	-0.146835	-0.148265
725	KWMTBOMO05000	CellTypeAll-M3	red	0.166479901681714	-0.210135	-0.0349167	0.654844765701085	0.479927295523244	0.0589317228351367	-0.105669	0.439491025438893	-0.23429	0.169559660500569	-0.34176	0.0498856739784927	-0.223399
726	KWMTBOMO05006	CellTypeAll-M4	tan	0.0294336613078947	-0.102529	-0.0470663	0.184471339769475	0.283171149714739	0.021328062604441	0.250601453779661	0.196865307756535	-0.146393	-0.0268615	-0.174841	-0.0688143	-0.107306
727	KWMTBOMO05010	CellTypeAll-M2	turquoise	0.157909011656568	0.115843400165458	0.190599544828885	0.0102500290375031	0.0170501314981301	0.150107785165171	-0.0633514	-0.0825536	0.141431621483832	-0.00396419	0.106826446671268	0.0404943370375076	0.0318914795124246
728	KWMTBOMO05016	CellTypeAll-M2	turquoise	0.302453920193754	0.432493817842268	0.448771465377835	-0.184454	-0.122239	0.397524118394731	-0.137783	-0.340843	0.325748122017432	-0.14695	0.369938040034076	-0.0127935	0.0984083606795809
729	KWMTBOMO05019	CellTypeAll-M3	red	0.190454499921221	-0.104055	0.0259883483317649	0.485135580240162	0.287126847000365	0.0880960096728887	-0.0691889	0.277023164268022	-0.14579	0.0816557452321815	-0.194081	0.0221169396134048	-0.120155
730	KWMTBOMO05024	CellTypeAll-M7	green	-0.0761352	-0.244338	-0.243962	0.239811509630148	0.0470858761408695	-0.253041	-0.0560748	0.484494034385177	-0.240347	0.277800968028112	-0.331297	0.0944158119795966	-0.088962
731	KWMTBOMO05031	CellTypeAll-M6	yellow	-0.15461	-0.142634	-0.162401	-0.043405	0.17556334979349	-0.101658	0.675629498172932	0.174056516674467	-0.209589	-0.147282	-0.195044	-0.188329	-0.0731609
732	KWMTBOMO05045	CellTypeAll-M3	red	0.0491902811300374	-0.214257	-0.123734	0.479863028020848	0.376435157662401	-0.0393931	0.144788339827578	0.420663085120489	-0.263406	0.132501252915857	-0.330584	0.0196295632062181	-0.161422
733	KWMTBOMO05046	CellTypeAll-M3	red	0.162075858489675	-0.10568	0.0317630648396978	0.403674177600397	0.300220240328666	0.0808891969892043	-0.0171074	0.238307685373043	-0.123851	0.0623345233943256	-0.181818	0.0102022445857172	-0.123774
734	KWMTBOMO05048	CellTypeAll-M11	magenta	0.0648059247052623	-0.0312104	0.030280283055547	-0.0330308	-0.0879039	-0.0677401	-0.0898496	-0.0255912	0.169999085050867	0.206108685288705	0.108169523185492	0.248391859310146	0.177704441379899
735	KWMTBOMO05056	CellTypeAll-M5	brown	0.344551276345151	0.349067742619771	0.381432977935781	-0.00723402	0.0465635672234496	0.410679892537717	-0.053049	-0.199493	0.184390708917917	-0.132354	0.222430766139463	-0.0374849	-0.0121197
736	KWMTBOMO05058	CellTypeAll-M5	brown	0.260927273312643	0.125569263080954	0.236351979804653	0.223423385322242	0.300394785902428	0.340197337841894	0.0803851293522564	0.0164248000606791	0.00141054101140135	-0.126043	-0.0262345	-0.0998714	-0.166758
737	KWMTBOMO05060	CellTypeAll-M2	turquoise	0.194797868173415	0.0882994114788588	0.21433023729473	0.0101277210065881	0.00853726922237401	0.135475734031745	-0.0791438	-0.0786068	0.197732549224079	0.0516460074871179	0.119096139905438	0.0970985400967267	0.0540759663482659
738	KWMTBOMO05068	CellTypeAll-M12	black	-0.0148731	-0.0100657	0.0028497568932373	-0.333647	-0.340191	-0.234316	0.0410217895919835	-0.205358	0.348497526528386	0.314048626140954	0.32264432472876	0.403927421146423	0.657292966802198
739	KWMTBOMO05069	CellTypeAll-M9	pink	0.0424373835745159	-0.188374	-0.131278	0.238530562564727	0.0116134341993795	-0.232491	-0.148279	0.304003544960011	0.00902544651313392	0.500734980379655	-0.0966176	0.383043393090323	0.208441618733512
740	KWMTBOMO05073	CellTypeAll-M8	blue	0.186169725888773	0.0796379674898292	0.189601158143123	-0.0712366	-0.0934371	0.0655595121189107	-0.104386	-0.127679	0.296258378508899	0.149431253401822	0.205705099972678	0.2168442746682	0.193656434584991
741	KWMTBOMO05075	CellTypeAll-M9	pink	0.0107227243514041	-0.182368	-0.134956	0.144708504022409	-0.0555706	-0.277244	-0.142338	0.240414704851127	0.0785628717433626	0.526518333148867	-0.0261341	0.426418024619919	0.318679425615014
742	KWMTBOMO05078	CellTypeAll-M12	black	0.134330502327654	0.0820245619813627	0.108655412095813	-0.135838	-0.226718	-0.0868576	-0.110577	-0.148895	0.353383930469488	0.336515761311611	0.331110856793586	0.401496715347515	0.496591294299084
743	KWMTBOMO05087	CellTypeAll-M2	turquoise	0.391188849232908	0.244195346878866	0.417728306398249	0.0423355099833949	0.0743118156437804	0.351076673226636	-0.0843114	-0.166024	0.261301369669868	-0.0632324	0.209506585795401	0.0357448551819818	0.00138385594144462
744	KWMTBOMO05092	CellTypeAll-M8	blue	0.257095774900299	0.181321991733166	0.300910378892953	-0.0439355	-0.0430614	0.190112511679569	-0.130661	-0.186527	0.318260618910022	0.0571965978418198	0.239925500288468	0.15984217172141	0.161281539453441
745	KWMTBOMO05099	CellTypeAll-M2	turquoise	0.286791356753886	0.179776920929065	0.308143744043566	0.0116121572588445	0.0386892725470874	0.247597662337944	-0.0433743	-0.120127	0.21847623037953	-0.0207222	0.16418629550618	0.0556670531130567	0.0376202607791246
746	KWMTBOMO05102	CellTypeAll-M8	blue	0.219028826609236	0.172787923596733	0.322670048341031	-0.265686	-0.221291	0.144258058217793	-0.181382	-0.430855	0.555070724768268	0.0716939051139219	0.447034271346944	0.236851407826868	0.293926515518115
747	KWMTBOMO05106	CellTypeAll-M8	blue	0.176035367887344	0.0523193813074156	0.320190845083981	-0.334772	-0.266645	0.115699282971132	-0.223431	-0.554168	0.668060196444336	0.0625838730862958	0.507288272462743	0.256341681514105	0.290187837590269
748	KWMTBOMO05111	CellTypeAll-M5	brown	0.23380898808953	0.234712487625007	0.266027972344547	0.0167601900795448	0.0753990426385424	0.304491790232448	-0.000388044	-0.120535	0.114001550045358	-0.103438	0.148607513541256	-0.0441608	-0.0325915
749	KWMTBOMO05115	CellTypeAll-M1	greenyellow	0.260085623943691	0.280295508217331	0.30020484344136	-0.0219614	-0.0153825	0.295853821561926	-0.10879	-0.177743	0.181741536609478	-0.0488113	0.217917973099141	0.0224648267207297	0.0277580479091514
750	KWMTBOMO05131	CellTypeAll-M3	red	0.14402526926493	-0.0190519	0.0344886077244599	0.314127386840002	0.235533537217948	0.116989080562782	-0.037786	0.156286134342963	-0.116791	0.0215191369030275	-0.119488	-0.0150898	-0.124525
751	KWMTBOMO05132	CellTypeAll-M5	brown	0.19232279790319	0.080056317623035	0.128219498741411	0.279487241189839	0.35874732011971	0.29331645174723	0.102517705834801	0.0971582089409768	-0.129795	-0.145161	-0.104315	-0.154319	-0.233598
752	KWMTBOMO05136	CellTypeAll-M3	red	0.135166443517457	-0.0468103	0.0455705222037759	0.3179340268995	0.270293988066356	0.102360323131725	0.0494770917539563	0.183320516582745	-0.0935119	0.0214280983445309	-0.128093	-0.0154407	-0.108374
753	KWMTBOMO05137	CellTypeAll-M3	red	0.120172374087017	-0.100017	-0.00369943	0.324343760795967	0.173935314710161	0.0100324866769308	-0.0449234	0.223228028158411	-0.0946316	0.113349345049045	-0.148289	0.0692256497030132	-0.0364557
754	KWMTBOMO05139	CellTypeAll-M2	turquoise	0.384653885155276	0.148353642175665	0.38842825454898	0.114033196296506	0.107906897845805	0.302217205892683	-0.118393	-0.0965281	0.27543522598532	0.0135559911691569	0.160770290966972	0.0986802882086773	0.0192500165828521
755	KWMTBOMO05153	CellTypeAll-M11	magenta	0.0875824015793141	-0.0284715	0.0449688251371163	-0.0377847	-0.0967479	-0.0750466	-0.0997863	-0.056684	0.215790512413342	0.252563809776461	0.149542718669984	0.323232820832771	0.254077602760804
756	KWMTBOMO05162	CellTypeAll-M5	brown	0.224823134133167	0.1867275036374	0.244135369926821	0.0550494927244486	0.0769541288898973	0.265228091687548	-0.0557161	-0.0873802	0.101214864166803	-0.0745128	0.108846714342425	-0.028703	-0.0376519
757	KWMTBOMO05175	CellTypeAll-M5	brown	0.14323612356744	0.120139476974292	0.139891753425802	0.124727924690475	0.220007489551425	0.239703636803511	0.120164634760184	0.0217541822315086	-0.0408887	-0.127691	-0.0107383	-0.11231	-0.110674
758	KWMTBOMO05179	CellTypeAll-M6	yellow	0.0204179298149219	0.0342389483834173	0.0281670591405587	-0.0207379	0.135819199391153	0.0860521640767366	0.311691870982186	0.0108423430531559	-0.0576632	-0.129236	-0.0394745	-0.117228	-0.0634287
759	KWMTBOMO05187	CellTypeAll-M3	red	0.148635277000667	-0.0482051	0.0638145485933439	0.326731670352964	0.310353107181044	0.134579246629134	0.00530768990345233	0.173168304026467	-0.101964	-0.00651974	-0.148757	-0.0369573	-0.152833
760	KWMTBOMO05193	CellTypeAll-M9	pink	0.0437802897331951	-0.128054	-0.0887189	0.104331616658363	-0.0292512	-0.180776	-0.0128451	0.19315997324054	0.0287290265133049	0.38449159864172	-0.0404747	0.320379325396471	0.247728139733492
761	KWMTBOMO05194	CellTypeAll-M5	brown	0.249969197519157	0.225470814436242	0.261652862985299	0.117475098651213	0.182144652696513	0.350756135203491	-0.00689154	-0.0640348	0.0467798931099931	-0.127902	0.0801821854958529	-0.0876758	-0.0968691
762	KWMTBOMO05195	CellTypeAll-M2	turquoise	0.184957356902571	0.23098156971255	0.237249074262945	-0.0257592	0.00997017384560233	0.241500506280782	-0.0514855	-0.134218	0.117654458787509	-0.0826292	0.152756205674297	-0.0274647	0.0041096399819041
763	KWMTBOMO05203	CellTypeAll-M8	blue	0.143792586315226	-0.00678404	0.0914790422949824	-0.00735743	-0.09283	-0.0419123	-0.13261	-0.0542253	0.25808696121205	0.292026584373774	0.170586198924407	0.33346301828241	0.266949070466368
764	KWMTBOMO05204	CellTypeAll-M8	blue	0.216698809940965	0.121620407641009	0.241502534539205	-0.105912	-0.0935587	0.108796160798067	-0.0928901	-0.186722	0.34005643127377	0.0958884968336391	0.24640442003494	0.193641634444341	0.193019195801151
765	KWMTBOMO05205	CellTypeAll-M2	turquoise	0.287330837839025	0.195818693837832	0.342575538897837	-0.0232207	-0.00700765	0.248577187798813	-0.109034	-0.174462	0.289559387923199	0.00920667157472687	0.209639969938386	0.100673952390475	0.0819509352995935
766	KWMTBOMO05209	CellTypeAll-M8	blue	0.282513211855954	0.176617762132342	0.307228716903397	-0.015866	-0.0349039	0.198129875441345	-0.142159	-0.150031	0.315446083027038	0.0860715867203478	0.225266180468948	0.171678309846893	0.148678269094657
767	KWMTBOMO05212	CellTypeAll-M2	turquoise	0.155810646335426	0.10501593773911	0.16821851966226	0.0135898315609772	0.0157479288656309	0.127598322004421	-0.0555929	-0.0631465	0.128932971532606	0.0167284108086996	0.0991682289501262	0.0569031414260656	0.0458707139757794
768	KWMTBOMO05213	CellTypeAll-M7	green	0.0658194412455764	-0.251477	-0.171916	0.578863954784353	0.404736486929684	-0.0504119	0.0428269614215688	0.611878622478042	-0.404386	0.161189343783589	-0.480514	-0.0370248	-0.308869
769	KWMTBOMO05220	CellTypeAll-M3	red	0.0994739432783658	-0.0981181	-0.0236594	0.306649670476557	0.17680831395234	-0.00314665	-0.0303177	0.232994179028953	-0.105698	0.116294032629829	-0.156433	0.0563428805274504	-0.0558169
770	KWMTBOMO05221	CellTypeAll-M7	green	0.0745035592695017	-0.237035	-0.154528	0.524488784171607	0.273622204578468	-0.137845	-0.107385	0.510290867226586	-0.237195	0.361342039676721	-0.343671	0.217994614806294	-0.0555442
771	KWMTBOMO05228	CellTypeAll-M9	pink	0.155311456295844	-0.105681	0.0427320843345931	0.131364057242793	-0.0999874	-0.15933	-0.353409	0.00719635699502652	0.314933537047924	0.553528335895044	0.182134390684277	0.566292064747129	0.441991181783824
772	KWMTBOMO05237	CellTypeAll-M6	yellow	0.162098002409765	0.0232567127253612	0.114037653327058	0.201184057820944	0.277779491221232	0.199636564972527	0.195019629280804	0.0861652096080838	-0.0572414	-0.0920948	-0.0748262	-0.0934205	-0.128205
773	KWMTBOMO05242	CellTypeAll-M5	brown	0.152448328981263	0.233941120010759	0.189987770206042	-0.0285354	-0.00499528	0.257716278457052	-0.0598175	-0.129205	0.0517484588651222	-0.103173	0.142046163833849	-0.0641894	-0.0490976
774	KWMTBOMO05252	CellTypeAll-M5	brown	0.230297578038003	0.187091281611588	0.264042933458594	0.0458282557555236	0.0840568449228007	0.294416832445666	-0.0556163	-0.109608	0.118250237603565	-0.0933591	0.115172806019833	-0.0378226	-0.05095
775	KWMTBOMO05258	CellTypeAll-M8	blue	0.283163246296298	0.101549303207295	0.290269908480128	-0.104371	-0.151067	0.0854137794645433	-0.18519	-0.25311	0.499930924768827	0.260124777105954	0.368417609386481	0.396226140610094	0.384396714553219
776	KWMTBOMO05259	CellTypeAll-M9	pink	0.0275530830303509	-0.0551985	-0.0449532	0.0193398038576723	-0.0667271	-0.119178	-0.0444865	0.068897764709092	0.0668228062272683	0.260723199880293	0.0332210606083032	0.230406320365317	0.199492306372035
777	KWMTBOMO05262	CellTypeAll-M2	turquoise	0.222267248217735	0.125267758642361	0.243377843387618	0.0292501755817131	0.0508952734172365	0.196547321845455	-0.0443063	-0.0828749	0.161203719735987	-0.0219969	0.10078832739007	0.0366682025755654	0.00851611191274136
778	KWMTBOMO05271	CellTypeAll-M6	yellow	0.175826891964309	0.100474668085407	0.172941207002274	0.088526156996622	0.276516441765783	0.269041065027096	0.347519821775577	0.00445778104857947	-0.0254511	-0.194995	-0.0427737	-0.163587	-0.152125
779	KWMTBOMO05274	CellTypeAll-M2	turquoise	0.318437721515084	0.193817968181232	0.334525107694688	0.0898884220325475	0.0967387810453202	0.290268279494034	-0.0885688	-0.0904886	0.185041921165667	-0.0321871	0.138445199957859	0.0340320923066479	0.00191972236974271
780	KWMTBOMO05279	CellTypeAll-M5	brown	0.277798855607883	0.178646423186539	0.308582563005631	0.11625533857001	0.151092304219481	0.33563946212577	-0.0573796	-0.0895302	0.137041948716886	-0.0843582	0.101795896276952	-0.0270916	-0.0685466
781	KWMTBOMO05280	CellTypeAll-M12	black	0.0163026147796582	0.00215758668673374	0.0126334526147092	-0.258054	-0.293037	-0.208732	-0.00283837	-0.196806	0.346510286207567	0.3582311759826	0.326012386978577	0.446677299617626	0.672893534382163
782	KWMTBOMO05297	CellTypeAll-M2	turquoise	0.273534999966693	0.15338980537491	0.328321942186306	0.00349396694031083	0.0311253533280486	0.268291544442611	-0.0958327	-0.164976	0.253184204847949	-0.0294254	0.1736356275516	0.0589196169099513	0.0152616622301319
783	KWMTBOMO05301	CellTypeAll-M2	turquoise	0.303192073566445	0.513254492303081	0.504973284182919	-0.273846	-0.181056	0.468217591091451	-0.175611	-0.47278	0.371824187975024	-0.221048	0.448783598341167	-0.0517489	0.0830641372765822
784	KWMTBOMO05302	CellTypeAll-M7	green	-0.0144684	-0.203122	-0.168831	0.233517958120134	0.0694608299034808	-0.186121	-0.0384904	0.404161264698356	-0.168734	0.254824080605747	-0.262534	0.118619108432762	-0.0411131
785	KWMTBOMO05303	CellTypeAll-M3	red	0.0556335639525117	-0.118276	-0.0511704	0.287628714564674	0.24167100221612	-0.00117124	0.120863715948393	0.245846097039548	-0.142166	0.053061955864691	-0.18351	-0.00699035	-0.103675
786	KWMTBOMO05310	CellTypeAll-M2	turquoise	0.155442185873523	0.107438932898504	0.176460928768253	0.0448365295504023	0.0691022129937767	0.173965789477523	-0.027289	-0.0495349	0.0835630962059738	-0.0418547	0.0650529871760189	-0.00858165	-0.0226359
787	KWMTBOMO05331	CellTypeAll-M6	yellow	0.15016717414027	0.0784615334841306	0.11360481838806	0.152283735176548	0.239091228476528	0.189174751852818	0.167867175365012	0.0729054332792764	-0.0490347	-0.0841305	-0.0386071	-0.0781684	-0.0916917
788	KWMTBOMO05338	CellTypeAll-M7	green	0.0399605768009785	-0.288826	-0.182744	0.505392732777901	0.421625635166296	-0.0916323	0.217392349338588	0.554969956245257	-0.343874	0.150072017251451	-0.450289	-0.00522457	-0.216336
789	KWMTBOMO05339	CellTypeAll-M7	green	0.0224253057242323	-0.340312	-0.256178	0.651169122427653	0.339916298571287	-0.192813	-0.114913	0.683119080656208	-0.391569	0.348599991367698	-0.505843	0.126175349329927	-0.194352
790	KWMTBOMO05348	CellTypeAll-M7	green	-0.1346	-0.270696	-0.276093	0.19639646638199	0.171960580577668	-0.242218	0.257521130897454	0.493729429138269	-0.304356	0.134329032117148	-0.38122	-0.0323483	-0.150439
791	KWMTBOMO05357	CellTypeAll-M5	brown	0.259392726929911	0.251743399970075	0.320926134975825	0.0299140212376111	0.129818971784898	0.397952605898768	0.00566264749781364	-0.155856	0.122491636136022	-0.171657	0.137679294947087	-0.0986415	-0.0936438
792	KWMTBOMO05364	CellTypeAll-M5	brown	0.270666007645078	0.121479302758605	0.25866969017838	0.275647981846171	0.326890154374907	0.373918100495951	-0.00627374	0.0162541405160514	0.0144499891618657	-0.113615	-0.0184787	-0.0883757	-0.18296
793	KWMTBOMO05372	CellTypeAll-M5	brown	0.352420445237818	0.3070526263742	0.408500375351358	0.074037579251864	0.126771701263301	0.429851817789019	-0.0884354	-0.156592	0.187995577845487	-0.125477	0.187080820468427	-0.0423656	-0.0450615
794	KWMTBOMO05384	CellTypeAll-M2	turquoise	0.280949239760198	0.18672492928262	0.29493759303586	0.0322385134796662	0.0588264312139661	0.260360964005426	-0.0235723	-0.0960671	0.173552648822019	-0.045724	0.144134182384535	0.0178427088121797	0.00662544438372576
795	KWMTBOMO05402	CellTypeAll-M3	red	0.194471685938832	-0.0297277	0.111995820265585	0.35801803768308	0.30908150064845	0.193595266292903	-0.0325257	0.139669891862197	-0.073361	-0.0372802	-0.127763	-0.054061	-0.16433
796	KWMTBOMO05408	CellTypeAll-M6	yellow	-0.0109821	-0.0381296	0.0237571877848224	-0.109142	0.0376748956271858	0.028697937332138	0.32499534992484	-0.051168	0.0223162044451234	-0.106843	-0.0302068	-0.0723598	-0.0217397
797	KWMTBOMO05418	CellTypeAll-M2	turquoise	0.194112989225541	0.128811698759293	0.208615919893787	0.0300439755326631	0.0405806446761783	0.16655927246175	-0.0391309	-0.0696502	0.129786426784505	-0.0153057	0.101523497380273	0.0308586073910345	0.0248856526660122
798	KWMTBOMO05421	CellTypeAll-M5	brown	0.20942012563175	0.294167872545359	0.266072883789691	0.0497187577118211	0.150043004850781	0.389264041922763	0.0187784534931276	-0.115997	0.0366494319499076	-0.184657	0.111914802838083	-0.135574	-0.105825
799	KWMTBOMO05423	CellTypeAll-M2	turquoise	0.191089694389717	0.144290133982494	0.243974788438756	-0.0128628	0.00976057073438653	0.201640603148077	-0.0664671	-0.120121	0.16638884297305	-0.045967	0.128915169013072	0.0123894768445002	0.00798175661071722
800	KWMTBOMO05426	CellTypeAll-M8	blue	0.126718031868442	0.0345410739974174	0.113708860462563	-0.0529441	-0.0835967	0.012027264487796	-0.0870389	-0.0967127	0.223488388974247	0.149626264948112	0.160110654140703	0.206367681702354	0.18104411603252
801	KWMTBOMO05427	CellTypeAll-M5	brown	0.265961819726159	0.234638496567713	0.306089328590532	0.0597807631914032	0.124938366177459	0.369577719142323	-0.0167419	-0.133595	0.125133240016312	-0.12679	0.130030156040962	-0.0621076	-0.0663968
802	KWMTBOMO05428	CellTypeAll-M5	brown	0.267378668653777	0.128357718133385	0.239165520515009	0.174858308782128	0.189987251900552	0.289387250562693	0.010921103934403	-0.0253527	0.0653225061028011	-0.0737102	0.0444834790239615	-0.0398116	-0.0885612
803	KWMTBOMO05430	CellTypeAll-M6	yellow	0.13053092987798	0.0366739153801306	0.0934668061991493	0.16133703030089	0.215914951481714	0.177213722668754	0.0972247898328663	0.0423227376094661	-0.0482929	-0.0810858	-0.053661	-0.079147	-0.122099
804	KWMTBOMO05435	CellTypeAll-M2	turquoise	0.245009023783769	0.286189414267136	0.338173050179952	-0.0873627	-0.0454865	0.316091973680087	-0.100186	-0.232126	0.211379860324655	-0.109374	0.250325782290291	-0.0180569	0.00770589609889045
805	KWMTBOMO05438	CellTypeAll-M4	tan	0.0745299176010573	-0.193441	-0.0823303	0.42433529392474	0.445977270957089	0.0210865977778845	0.310008632763169	0.374037030272649	-0.259636	0.00477435080404485	-0.311854	-0.0793688	-0.17777
806	KWMTBOMO05445	CellTypeAll-M6	yellow	0.122173783542384	0.0107535162423163	0.0731478058042779	0.0242144686648365	0.0383533814435641	0.012471332881288	0.180458059110446	0.0578224206626938	0.0852927183362134	0.0840550107106757	0.0451067720939492	0.0914916249290057	0.109223929751415
807	KWMTBOMO05449	CellTypeAll-M2	turquoise	0.249914996336113	0.146362143445604	0.275206860513217	-0.0154634	-0.0185968	0.189195662018338	-0.119468	-0.0823836	0.222338371227869	0.0185353265935595	0.133161699445327	0.0703592561825005	0.0328860330767482
808	KWMTBOMO05451	CellTypeAll-M2	turquoise	0.177791152271307	0.0924123065749189	0.208256082038792	-0.0227768	-0.00787282	0.13281508511832	-0.0494137	-0.0950088	0.188534454584292	0.00792622887160016	0.125111337436444	0.061355648790501	0.0475640933964954
809	KWMTBOMO05453	CellTypeAll-M2	turquoise	0.211782055431905	0.191777645052934	0.287917520731816	-0.0421033	0.00609926491171631	0.247032122226994	-0.0567983	-0.15691	0.19643286260808	-0.0713086	0.15971014865593	0.00614161310844331	0.0165094551953238
810	KWMTBOMO05461	CellTypeAll-M2	turquoise	0.173051423605684	0.122369885168058	0.19477114242218	-0.0102026	0.00107000398841849	0.143895838209805	-0.0578883	-0.0920143	0.161177487579117	0.0179602985986998	0.125963997896296	0.0706824568441746	0.0645744551639014
811	KWMTBOMO05464	CellTypeAll-M11	magenta	0.134994838622302	-0.0668054	0.0567701570640312	0.0248471890010299	-0.106826	-0.113027	-0.194251	-0.0303962	0.297510082602313	0.403156460382498	0.189957780756148	0.476240556029392	0.38662849641719
812	KWMTBOMO05469	CellTypeAll-M8	blue	0.243740631484853	0.127017907418776	0.2691074282451	-0.0647481	-0.0827706	0.122372390253358	-0.139202	-0.169192	0.350030392788689	0.121683065442928	0.248290527011718	0.212384380151809	0.190275856098034
813	KWMTBOMO05470	CellTypeAll-M2	turquoise	0.17615857862266	0.101160865142984	0.19043450758348	-0.0149589	-0.0186126	0.111147802930164	-0.0629398	-0.081328	0.185939635890069	0.0452353743587607	0.128189341695141	0.0982449843409778	0.0851706189195823
814	KWMTBOMO05474	CellTypeAll-M11	magenta	0.0794896748916339	-0.028287	0.0458644250283258	-0.00992852	-0.0585673	-0.0449518	-0.0905247	-0.0242413	0.15816677650458	0.1768791739217	0.0947749399146029	0.221701355394056	0.142949672468028
815	KWMTBOMO05475	CellTypeAll-M2	turquoise	0.338507619873291	0.12930166599694	0.374741636529523	0.0327173122091919	0.0719508686446473	0.287298754770488	-0.0746691	-0.166127	0.321200751799903	-0.0133259	0.20305674761996	0.0885853486984672	0.0379743082737851
816	KWMTBOMO05480	CellTypeAll-M6	yellow	0.14749283082158	0.00738131532181163	0.0959168521716383	0.117213815449332	0.211717126117598	0.124018827555676	0.221795323427932	0.0718474986198222	0.0024450980387877	-0.0236308	-0.0415254	-0.0138746	-0.0524601
817	KWMTBOMO05483	CellTypeAll-M8	blue	0.237126065020011	0.16395550248311	0.284827849791985	-0.0634002	-0.0409072	0.18487203133674	-0.0843738	-0.162457	0.291560004525688	0.0265255760873746	0.206980689142438	0.114320823229662	0.113616095098768
818	KWMTBOMO05503	CellTypeAll-M5	brown	0.144740826625381	0.179605092808847	0.162325853105262	0.00908901860813487	0.0363956821034507	0.206385025329203	-0.0134581	-0.0790508	0.0442339937080442	-0.0776624	0.091168762749491	-0.0479918	-0.0292489
819	KWMTBOMO05507	CellTypeAll-M3	red	0.153125089615982	-0.0375659	0.0198801660145884	0.302100391710279	0.186880958471997	0.0534849388507549	0.0442015046632692	0.216795878667193	-0.0887677	0.132995033669385	-0.114158	0.0914574134605038	-0.00865387
820	KWMTBOMO05522	CellTypeAll-M7	green	0.0566996367373195	-0.251662	-0.140258	0.449738573187167	0.356216973905857	-0.0980946	0.0415201186136225	0.464988846902846	-0.236889	0.228197926884335	-0.354141	0.0938347586308539	-0.150486
821	KWMTBOMO05526	CellTypeAll-M5	brown	0.297461927588645	0.228014530607191	0.300035701821846	0.125809374779075	0.15898517597512	0.355493001820999	-0.0445232	-0.0817729	0.0856908156649365	-0.110885	0.0989412666656469	-0.0594109	-0.0865974
822	KWMTBOMO05542	CellTypeAll-M2	turquoise	0.197118139763812	0.117461517590958	0.213169523641595	0.00855121374237047	0.0215051842805051	0.160321617464559	-0.0378907	-0.0725605	0.150750917842447	-0.00890377	0.108126073771552	0.0398543920255104	0.0266552700744724
823	KWMTBOMO05546	CellTypeAll-M6	yellow	0.000496808232325345	-0.0504923	-0.0165616	-0.0112522	0.104174522852506	0.0155846598189517	0.324627554965795	0.0429752335804404	-0.0604761	-0.0645711	-0.094114	-0.070974	-0.0585737
824	KWMTBOMO05564	CellTypeAll-M11	magenta	0.0830774983216677	-0.0619168	0.021224911715455	1.11220639881198e-05	-0.0968494	-0.105886	-0.131291	0.00852308796403268	0.197303451284467	0.299324588142507	0.112412177907437	0.332949854639361	0.225124444326907
825	KWMTBOMO05565	CellTypeAll-M4	tan	0.280205129876299	0.0965974832395601	0.234498699768514	0.258437291560543	0.330833152447987	0.284980297379719	0.0380104714164141	0.0724659070850619	0.0208339798240125	-0.049381	-0.02738	-0.0319378	-0.113813
826	KWMTBOMO05566	CellTypeAll-M11	magenta	0.143651252659977	-0.0132376	0.0857533589752323	0.0389052811935348	-0.0574566	-0.0396638	-0.160337	-0.0373933	0.236697287290674	0.289180729630228	0.156951084768991	0.362756473808819	0.246503884829544
827	KWMTBOMO05572	CellTypeAll-M8	blue	0.232257384404584	0.102577696565148	0.264411007310202	-0.175172	-0.202466	0.0447041101014548	-0.218235	-0.259094	0.50394186808796	0.234902117416795	0.359611527870767	0.358197719014112	0.347954605901005
828	KWMTBOMO05582	CellTypeAll-M7	green	-0.0358349	-0.147759	-0.123666	0.169592788745073	0.176685149446746	-0.0876666	0.14592468039451	0.287071537950312	-0.178212	0.0459975124286209	-0.22874	-0.0500546	-0.125275
829	KWMTBOMO05583	CellTypeAll-M7	green	0.0659604291139646	-0.060963	-0.0205819	0.183069178456055	0.0886411369574991	-0.0289727	-0.0389112	0.17335590629503	-0.0467084	0.146842982717168	-0.091749	0.101908241153128	0.00273996417830975
830	KWMTBOMO05593	CellTypeAll-M8	blue	0.315625986890424	0.15533900423553	0.332529832643988	-0.013533	-0.0223109	0.195213507344536	-0.122629	-0.144234	0.326745319002552	0.0641191880580336	0.21207538686567	0.162729596439117	0.127406359483426
831	KWMTBOMO05597	CellTypeAll-M11	magenta	0.0611961574124339	-0.0314686	0.0129156641992075	0.0228589109517253	-0.0427599	-0.0533744	-0.0785706	0.0140906559993336	0.111493248600789	0.184231558528908	0.0644901393404989	0.208432875784559	0.134386203568522
832	KWMTBOMO05600	CellTypeAll-M2	turquoise	0.263374266421102	0.152592872656751	0.279098604335293	0.0448293625934145	0.0498329024323622	0.229695397478594	-0.0813858	-0.115425	0.19580842199715	-0.00254816	0.158473902564285	0.0604385319470126	0.0260005406901115
833	KWMTBOMO05601	CellTypeAll-M6	yellow	0.0449213776373122	-0.0256744	0.020858136326598	0.0763484331095986	0.178711591628016	0.0890819569472769	0.158048929778167	0.0299595168051241	-0.0509257	-0.0691674	-0.0862668	-0.0697047	-0.112998
834	KWMTBOMO05605	CellTypeAll-M5	brown	0.155688883509889	0.172955278939024	0.131442053381912	0.129574087623663	0.163612743916523	0.283948631578432	0.0300685317204143	-0.0242456	-0.0714834	-0.146284	0.0207674827889016	-0.13718	-0.161371
835	KWMTBOMO05607	CellTypeAll-M6	yellow	-0.0951029	-0.116517	-0.125941	-0.00194422	0.132218956036525	-0.0813257	0.423812845994738	0.154503916025955	-0.151592	-0.0563225	-0.165214	-0.10803	-0.0696253
836	KWMTBOMO05610	CellTypeAll-M11	magenta	0.0307596820149094	-0.0667631	-0.0256038	0.0276341088943725	-0.0409571	-0.0895878	-0.0755356	0.0367419568688913	0.0838592049509685	0.206905042570969	0.0354620289491811	0.224555049159355	0.139265046617917
837	KWMTBOMO05612	CellTypeAll-M8	blue	0.247446347542606	0.123439030656249	0.295527714534861	-0.138384	-0.131583	0.125316091739282	-0.16256	-0.239195	0.431258228895517	0.125225035480471	0.297689871366252	0.239881959636579	0.221025038243674
838	KWMTBOMO05614	CellTypeAll-M3	red	0.10951614262719	-0.109905	-0.0168042	0.343944926294738	0.243274392379578	0.014178122148246	0.0901716837201914	0.257423535917471	-0.118093	0.105930444700188	-0.169664	0.0454215998326345	-0.0658495
839	KWMTBOMO05623	CellTypeAll-M2	turquoise	0.216416525062463	0.141997769979027	0.238888017494981	-0.00355831	-0.00596147	0.157340732661907	-0.0933053	-0.120278	0.222177085476088	0.0415346592606698	0.177185630403617	0.107883928256885	0.100395078664353
840	KWMTBOMO05629	CellTypeAll-M5	brown	0.12812847131648	0.175357205474859	0.160434259525765	-0.00723916	0.060274202715428	0.219453638951166	0.0388079704139709	-0.082362	0.0413736162182246	-0.103161	0.0888686540125421	-0.0683388	-0.0378504
841	KWMTBOMO05630	CellTypeAll-M4	tan	0.0512274419937318	-0.0635779	-0.00312805	0.169339521406935	0.31225015383999	0.0775937639493865	0.205189179690118	0.126329225725076	-0.107707	-0.0626088	-0.135436	-0.0866976	-0.127962
842	KWMTBOMO05631	CellTypeAll-M5	brown	0.2869069670594	0.233924170126335	0.308520030297993	0.0579435440733749	0.0772472779614723	0.314160773949638	-0.0680741	-0.114436	0.153104027940258	-0.0637514	0.156873893820641	0.00151306751440673	-0.00380574
843	KWMTBOMO05634	CellTypeAll-M3	red	0.255961447496097	-0.0456282	0.126293494481361	0.434525058803034	0.345523034578437	0.183849161509206	-0.0222598	0.239998035658927	-0.0830685	0.0522303384508728	-0.160601	0.00947000949015074	-0.161791
844	KWMTBOMO05635	CellTypeAll-M8	blue	0.302525209218902	0.227739732133043	0.392473008090907	-0.116097	-0.0752059	0.264013075296597	-0.118565	-0.255344	0.382273171591558	-0.015596	0.27712884431642	0.111727151288486	0.118036683495593
845	KWMTBOMO05647	CellTypeAll-M2	turquoise	0.181984874226455	0.150895233167284	0.210682730932742	-0.00909782	0.00645697281598932	0.175468524316327	-0.0440515	-0.100775	0.141882547535038	-0.0209718	0.128913926403372	0.0326042319363931	0.0386788810582419
846	KWMTBOMO05662	CellTypeAll-M2	turquoise	0.339406444112983	0.253939373791545	0.395131849326944	0.0517230570414365	0.0686344124004093	0.330189994564797	-0.130767	-0.151027	0.25932677536038	-0.0301858	0.190687192473438	0.0633057641773242	0.04581625442497
847	KWMTBOMO05665	CellTypeAll-M2	turquoise	0.193172444972639	0.139229762410706	0.213207584946651	-0.0103002	-0.00533355	0.153784538334605	-0.0634046	-0.100412	0.173635188046974	0.0118703058109853	0.139713619737598	0.069566028313456	0.0616694370075419
848	KWMTBOMO05669	CellTypeAll-M9	pink	0.0827596230921828	-0.0995251	-0.109716	0.275848807177242	0.0486191714746774	-0.154215	-0.0743581	0.308606332457083	-0.0700487	0.412013664335503	-0.0784415	0.281767915623076	0.160492986156165
849	KWMTBOMO05670	CellTypeAll-M8	blue	0.29957351651597	0.159345639890517	0.363773034600639	-0.171209	-0.180813	0.15086126250996	-0.236149	-0.314615	0.549403380521537	0.17294099622678	0.392216747248481	0.322052131726013	0.310703585186129
850	KWMTBOMO05672	CellTypeAll-M11	magenta	0.0848614879910281	-0.0760017	-0.0138626	0.0319394536360849	-0.0531284	-0.132705	-0.00838858	0.096672231267609	0.130620490708996	0.326809419030785	0.0556190961908334	0.351131106530841	0.272844268012395
851	KWMTBOMO05673	CellTypeAll-M8	blue	0.332668943818004	0.277679881218676	0.433176030346159	-0.135	-0.10311	0.287746250376672	-0.17147	-0.333701	0.464635034725561	0.0182207513330902	0.384236663351631	0.175865386550572	0.214745617023201
852	KWMTBOMO05674	CellTypeAll-M5	brown	0.167322388659718	0.110025907711626	0.110822901870628	0.208042737071605	0.237055917171409	0.224162941076627	0.101428845967209	0.0778452940889546	-0.0767008	-0.0600085	-0.0325641	-0.0703095	-0.12159
853	KWMTBOMO05675	CellTypeAll-M12	black	0.116687301957746	-0.0509763	0.125580552162162	-0.134405	-0.204443	-0.105794	-0.148855	-0.203178	0.447644775034449	0.358947134803212	0.311168713055445	0.458386557122227	0.541726577009821
854	KWMTBOMO05681	CellTypeAll-M2	turquoise	0.233704457898043	0.15290502829278	0.289828907922236	-0.0289813	0.00699976376174386	0.223402171198016	-0.0579012	-0.148453	0.233356863035385	-0.024452	0.17038464739036	0.0533055418175299	0.0419107709910282
855	KWMTBOMO05683	CellTypeAll-M10	purple	0.249510636304614	0.167043403160548	0.217422907251958	0.0369093258090818	-0.00984861	0.148446071885366	-0.0659499	-0.0454853	0.179723127325745	0.10732331568112	0.177005446850457	0.152838161198028	0.146201699516727
856	KWMTBOMO05696	CellTypeAll-M6	yellow	-0.101516	-0.192514	-0.147498	0.216288570781008	0.447584496836553	-0.0169018	0.607959738400825	0.367280986570242	-0.350448	-0.142122	-0.4194	-0.250818	-0.302522
857	KWMTBOMO05700	CellTypeAll-M11	magenta	0.000924043712885846	-0.164056	-0.10276	0.00585352402508755	-0.106069	-0.238175	-0.0407894	0.0908513428598374	0.134732583313804	0.390270284348667	0.049124742320909	0.394908029994207	0.304380916895504
858	KWMTBOMO05702	CellTypeAll-M6	yellow	0.011357356194352	-0.0295013	0.0412171132338035	-0.130462	0.0657393960556303	0.0785147407614165	0.36417060552074	-0.115104	0.0185166992642819	-0.169681	-0.0525889	-0.118896	-0.0903297
859	KWMTBOMO05718	CellTypeAll-M5	brown	0.351501528717797	0.280547687075302	0.377972679819099	0.088107185410828	0.124539870970536	0.394137002930407	-0.0546767	-0.129408	0.183153887672845	-0.0864516	0.174588188714546	-0.00922671	-0.00627799
860	KWMTBOMO05719	CellTypeAll-M9	pink	0.0836522679746739	-0.0754049	-0.0324924	0.136099842035077	-0.00994248	-0.103845	-0.114032	0.140485067049567	0.0563617222654774	0.326478715545193	-0.00599369	0.279212831362287	0.170968762147796
861	KWMTBOMO05720	CellTypeAll-M2	turquoise	0.333005980200721	0.184328991062403	0.338655693877489	0.118124604627771	0.143590427307715	0.323321046886925	-0.0370251	-0.0864412	0.181121181433637	-0.043138	0.125512687719534	0.0274530884225308	-0.0210031
862	KWMTBOMO05721	CellTypeAll-M8	blue	0.159423412771699	0.0515410560381808	0.129725107605064	-0.0433839	-0.0958676	0.0017842628054057	-0.103891	-0.0825564	0.258075636492295	0.206350575210226	0.193120475034865	0.261520575704337	0.240717872260997
863	KWMTBOMO05723	CellTypeAll-M12	black	-0.0102981	-0.0406564	-0.0302858	-0.242109	-0.310923	-0.256264	-0.039475	-0.148441	0.316312816986714	0.39834184767842	0.284268965142877	0.464133851934828	0.65925095582469
864	KWMTBOMO05725	CellTypeAll-M5	brown	0.203393393188333	0.329397051526358	0.256919359659401	-0.0228678	0.0540794263643426	0.339184308812955	-0.00540858	-0.150737	0.0646718549154026	-0.151166	0.167216937579525	-0.100691	-0.0349182
865	KWMTBOMO05727	CellTypeAll-M7	green	0.0205720724607156	-0.171786	-0.144171	0.318069663251737	0.202460608541985	-0.102284	0.117860818244959	0.420509127177686	-0.244576	0.164380265331747	-0.283591	0.0449249773120647	-0.0782815
866	KWMTBOMO05728	CellTypeAll-M8	blue	0.167515040087346	0.0373523319027319	0.194928476508863	-0.0911633	-0.0896721	0.0579739501316742	-0.131428	-0.189983	0.348018167577663	0.155975537702199	0.243356876025566	0.245605774155572	0.199670577513025
867	KWMTBOMO05729	CellTypeAll-M7	green	-0.0196003	-0.0917077	-0.101698	0.0987485191047536	0.0113724733392928	-0.114276	-0.0406468	0.241311784066004	-0.106523	0.149072753406589	-0.129162	0.0494569100395288	-0.046229
868	KWMTBOMO05730	CellTypeAll-M7	green	0.0225699847918215	-0.131447	-0.0997841	0.255437229903067	0.151309629264613	-0.0891649	-0.0489179	0.299463108554046	-0.141408	0.177307151144659	-0.201946	0.0745334215142248	-0.0792146
869	KWMTBOMO05734	CellTypeAll-M3	red	0.114177756385054	-0.083383	-0.00639306	0.355408484476545	0.231581258850159	0.0516197020748193	-0.0428345	0.211749035228532	-0.131159	0.0559650242324143	-0.155237	-0.000101258	-0.107268
870	KWMTBOMO05735	CellTypeAll-M7	green	0.0307358243012311	-0.166723	-0.123683	0.385878960361129	0.253144647553532	-0.0883971	-0.0165215	0.357550842800948	-0.200284	0.217256971955878	-0.256055	0.100022987331262	-0.0878713
871	KWMTBOMO05739	CellTypeAll-M5	brown	0.35905636895876	0.2532685533822	0.379833835438134	0.0727807298309293	0.149846024017924	0.410030292799793	-0.000730939	-0.146908	0.178703617635978	-0.134246	0.158981669943483	-0.048294	-0.0638857
872	KWMTBOMO05741	CellTypeAll-M5	brown	0.295401087445028	0.273813560719019	0.291207859050768	0.0778494823886507	0.0919687233163921	0.32269710510634	-0.0515095	-0.103486	0.132330087761625	-0.0420472	0.172770560196219	0.0152275207669623	0.0198973874369518
873	KWMTBOMO05744	CellTypeAll-M5	brown	0.211771984041067	0.254430335632041	0.279828308888864	-0.0359666	0.00709002160550842	0.316170969358671	-0.0820103	-0.184318	0.144782001192501	-0.125825	0.175289528965695	-0.0523707	-0.0405139
874	KWMTBOMO05747	CellTypeAll-M5	brown	0.222443204840804	0.229586455470444	0.241160663735299	0.0376280636227033	0.0638075689117911	0.288391018162081	-0.0429707	-0.104095	0.0829806390822046	-0.0959124	0.131489457234535	-0.0478612	-0.0459373
875	KWMTBOMO05749	CellTypeAll-M2	turquoise	0.315792865367121	0.240120464726865	0.353522369711342	0.02529100812328	0.0776734961235509	0.316242519949012	-0.0156072	-0.137817	0.21612220450132	-0.0663357	0.176014895692138	0.0194110836172069	0.0239182935949528
876	KWMTBOMO05760	CellTypeAll-M9	pink	0.0395609792885691	-0.0956949	-0.0612184	0.122694641822715	-0.000254733	-0.113363	-0.0758127	0.167790778404469	0.000240072278948373	0.269018871946179	-0.0639037	0.208202108848349	0.108615483720324
877	KWMTBOMO05766	CellTypeAll-M3	red	0.123629736542898	-0.129207	-0.00815568	0.431665865828196	0.376239827324044	0.063216616931255	0.000857626764921806	0.294553672093706	-0.179192	0.0752072724975854	-0.243604	-0.00403095	-0.171374
878	KWMTBOMO05775	CellTypeAll-M7	green	0.122564610528737	-0.276521	-0.142376	0.702093609438781	0.397022611108339	-0.0704768	-0.143886	0.577116361784908	-0.315938	0.316407344524107	-0.421512	0.174177857509774	-0.129116
879	KWMTBOMO05781	CellTypeAll-M2	turquoise	0.294775980149793	0.359760418763115	0.423843425003291	-0.0869865	-0.00731511	0.421553761541284	-0.0989302	-0.282268	0.249157651421096	-0.170478	0.254059796829473	-0.0557877	-0.0142575
880	KWMTBOMO05784	CellTypeAll-M10	purple	0.18150869380828	0.19912914715326	0.200761487652082	-0.0314758	-0.0227921	0.166581822658841	-0.0388923	-0.109707	0.133709778530995	-0.0272714	0.173844151917221	0.0309287710461867	0.068917602534468
881	KWMTBOMO05794	CellTypeAll-M3	red	0.0686180569420173	-0.10899	-0.0676266	0.312218855386112	0.124063854516332	-0.057174	-0.0358649	0.252127988767835	-0.109421	0.184650785849872	-0.146375	0.110677608772515	-0.00845051
882	KWMTBOMO05806	CellTypeAll-M2	turquoise	0.157842159066779	0.0948243650387094	0.172467685718822	0.000767513817467374	-0.0167178	0.113175697516858	-0.0771708	-0.0956362	0.170384761856974	0.04618460330056	0.148410315358579	0.0974823350881784	0.0772489609546131
883	KWMTBOMO05809	CellTypeAll-M9	pink	0.0336013185700973	-0.098861	-0.0757493	0.0910431617546919	-0.0450396	-0.156893	-0.0563198	0.152511004782367	0.0428832598446166	0.336785248895607	-0.00979641	0.280381256960073	0.205506445612431
884	KWMTBOMO05810	CellTypeAll-M8	blue	0.373992125188032	0.260705892091939	0.446363542747607	-0.0982423	-0.0780355	0.294101026478227	-0.157475	-0.282902	0.468933255025855	0.0638930558168096	0.351718848966999	0.211233415958473	0.212044846390389
885	KWMTBOMO05816	CellTypeAll-M2	turquoise	0.164631160117324	0.156668742310405	0.196198227456896	-0.06238	-0.0600862	0.128479896717679	-0.0744944	-0.142117	0.193691112777212	0.0149633818958929	0.18692303275025	0.0778256462619116	0.102874114453674
886	KWMTBOMO05851	CellTypeAll-M2	turquoise	0.235833947535405	0.137093254108165	0.243890213380648	0.00957781491136027	0.00954386315436013	0.169619821333403	-0.0566825	-0.0899236	0.214510334665208	0.057110613566465	0.155795796162568	0.116904058623256	0.095851574450993
887	KWMTBOMO05852	CellTypeAll-M4	tan	0.0701357190379588	-0.141579	-0.0552124	0.30682743359143	0.342567311804638	0.0184465309902551	0.238643474407944	0.258254459768496	-0.172254	0.0197151461070399	-0.223145	-0.0357936	-0.113338
888	KWMTBOMO05892	CellTypeAll-M2	turquoise	0.311113470363615	0.284247369171945	0.406715051547418	-0.039747	-0.0173718	0.350254528805468	-0.141892	-0.23633	0.292975611939492	-0.0642978	0.244907316833117	0.0471480339594038	0.0542709518868912
889	KWMTBOMO05894	CellTypeAll-M2	turquoise	0.324764939307086	0.183494697097583	0.322617586248701	0.0631235442127631	0.0660517481913005	0.268105118203912	-0.0733496	-0.113191	0.22519965092936	0.00885816286211376	0.173318767315191	0.0857864060932573	0.0461661352962537
890	KWMTBOMO05895	CellTypeAll-M2	turquoise	0.218887754600501	0.085680044575988	0.207545312222855	0.0461714447268065	0.00793239596455642	0.124111118286844	-0.0898067	-0.0529269	0.195460212656137	0.0958824816063744	0.117777085861721	0.149932462679637	0.0982466602892949
891	KWMTBOMO05904	CellTypeAll-M6	yellow	-0.0107036	-0.0793144	-0.0148367	-0.0458647	0.0801261097627983	-0.0112492	0.27804415448076	0.0736186929141616	0.00938338327281654	-0.0614791	-0.0645408	-0.074947	-0.0543679
892	KWMTBOMO05908	CellTypeAll-M6	yellow	0.0822777953532578	0.0153028105225811	0.0976379045393741	-0.00750008	0.1229988487624	0.116084706754731	0.19082243899605	-0.0287289	0.071846988672795	-0.0907164	0.0144328375364469	-0.0626741	-0.0474295
893	KWMTBOMO05910	CellTypeAll-M8	blue	0.143056420020595	-0.00920786	0.111877205949523	-0.0233427	-0.0382491	0.00194814603231884	-0.0220757	-0.0229619	0.213124442613754	0.186116792784419	0.105261930295413	0.224400022249165	0.166987184476978
894	KWMTBOMO05914	CellTypeAll-M3	red	0.121333189490238	-0.0825327	-0.00967919	0.320603541547141	0.181072457656433	0.00227145115349109	-0.0213678	0.231314706201049	-0.0748198	0.168442816336957	-0.116008	0.105736647101999	-0.0287917
895	KWMTBOMO05924	CellTypeAll-M5	brown	0.204928290893788	0.175439677175403	0.221959589718609	0.0397878050926294	0.0796359885310813	0.253780739115398	-0.0254105	-0.0854493	0.0873610053928247	-0.0709939	0.103807888443016	-0.0277971	-0.0395719
896	KWMTBOMO05932	CellTypeAll-M3	red	0.201892449626928	0.0238331834148657	0.103617182739598	0.362215036407351	0.287472589470026	0.171451950765738	-0.00655725	0.201157136836864	-0.0945645	0.0379842778759101	-0.113678	-0.00125307	-0.117957
897	KWMTBOMO05948	CellTypeAll-M7	green	-0.0279627	-0.136543	-0.128377	0.163768818884408	0.0715249820055352	-0.127729	0.0334305599585587	0.278070507921658	-0.132717	0.161293732750604	-0.183609	0.0736059954604772	-0.0265431
898	KWMTBOMO05956	CellTypeAll-M5	brown	0.314555339968994	0.284556716915334	0.349964614985403	0.1775005100614	0.347503990737182	0.503258726451205	0.155578541714374	-0.0770324	0.0154887429469026	-0.270727	0.0452439511886734	-0.206596	-0.206686
899	KWMTBOMO05967	CellTypeAll-M10	purple	0.0876576580051044	0.14704310544094	0.0921157803705498	-0.0321767	-0.00866969	0.08434944298433	0.0817019364303531	-0.0355919	0.0414966146188062	-0.0158492	0.0971965054596628	0.00903781728436239	0.0764066346120449
900	KWMTBOMO05979	CellTypeAll-M12	black	0.033321044685749	0.0180058086383736	0.0297038990692496	-0.249667	-0.310904	-0.211866	-0.0427946	-0.188872	0.36723265011546	0.373722339960575	0.33736129161813	0.462567353260564	0.693361129081896
901	KWMTBOMO05980	CellTypeAll-M8	blue	0.220208948110997	0.0883454429579962	0.204405495629489	0.0232209645302696	-0.00766204	0.111293494236613	-0.088197	-0.0490826	0.201670690836208	0.0892145970343303	0.126823146387579	0.13652083521837	0.0908174601029259
902	KWMTBOMO05987	CellTypeAll-M9	pink	0.128731528262244	-0.113532	1.98571197481044e-05	0.165402407609768	-0.0571683	-0.167749	-0.236972	0.130248045956901	0.206868655468331	0.499225202138842	0.0916324577083775	0.458267914393055	0.335582704346311
903	KWMTBOMO05991	CellTypeAll-M2	turquoise	0.297423028227063	0.156697923655546	0.293007706607342	0.0905474763138223	0.105803168328496	0.249742879006017	-0.0374604	-0.0696903	0.17585476948384	-0.0066776	0.124510288051374	0.0552793323479129	0.0239995706321445
904	KWMTBOMO06006	CellTypeAll-M12	black	0.0943507907252883	0.00638696647126259	0.0161062507901876	-0.00809657	-0.0984192	-0.0948838	-0.0505164	0.0308973267494727	0.138727776625681	0.291773475858185	0.107872625837945	0.311299497609431	0.306893562303145
905	KWMTBOMO06028	CellTypeAll-M2	turquoise	0.212558	0.153864269427494	0.254573866444834	-0.0237923	-0.0139085	0.179133152405388	-0.0861605	-0.121742	0.212641086447278	0.00989313705454194	0.161881796671873	0.0765759850314861	0.0733032598479441
906	KWMTBOMO06040	CellTypeAll-M5	brown	0.200056560585848	0.231131665278513	0.201668891500639	0.0656814027766611	0.0836722429135873	0.266193344861729	-0.0391194	-0.0677658	0.0317466500131563	-0.0914323	0.0956830704652696	-0.0589678	-0.0448175
907	KWMTBOMO06044	CellTypeAll-M2	turquoise	0.299777297176153	0.178576231056324	0.321927876750926	-0.0143357	-0.0110255	0.214191630152324	-0.0867621	-0.127951	0.260192843929613	-0.00336746	0.182438663021328	0.0830865267664836	0.0671202140003449
908	KWMTBOMO06045	CellTypeAll-M2	turquoise	0.284461220970928	0.170421739360236	0.313028569143324	0.0152756564243969	0.0127616914108933	0.220898178117159	-0.0908259	-0.112623	0.252785174235314	0.0253356839355884	0.180241015510921	0.101492551454421	0.081906847958409
909	KWMTBOMO06046	CellTypeAll-M7	green	0.0310061271338115	-0.194962	-0.157728	0.259159427139988	0.0491009506215122	-0.213053	-0.0456761	0.403672977593061	-0.125678	0.368165147602958	-0.215561	0.242069226662224	0.0761181278734578
910	KWMTBOMO06056	CellTypeAll-M6	yellow	0.0905061326747701	-0.019916	0.0372193911420776	0.0544509440025961	0.074391485639365	0.0108248456894022	0.123316098931902	0.101854496621232	0.0221215296285782	0.0741153380530709	-0.0286027	0.0641092611778287	0.0302896424972965
911	KWMTBOMO06058	CellTypeAll-M2	turquoise	0.232979590441288	0.1770078840066	0.354479811835217	-0.135848	-0.0143718	0.330497022884916	-0.00857732	-0.289515	0.28840058226538	-0.149388	0.213880002548223	-0.0322649	-0.0483344
912	KWMTBOMO06071	CellTypeAll-M2	turquoise	0.264803545444748	0.2034180156742	0.318887549090761	0.0220249157391819	0.0564612569462832	0.287525390866688	-0.0738076	-0.130703	0.187177257623957	-0.0725217	0.14550209449488	-0.00229163	-0.00677957
913	KWMTBOMO06082	CellTypeAll-M7	green	0.0258633935649382	-0.196452	-0.117904	0.152092839533389	0.0375775105541382	-0.223368	-0.071996	0.308232921480623	-0.00675138	0.352044932425473	-0.124952	0.261676372935954	0.104161447145136
914	KWMTBOMO06083	CellTypeAll-M2	turquoise	0.232621884195204	0.159511344576844	0.256714184685319	-0.0484198	-0.0540296	0.151931517746371	-0.0911996	-0.110761	0.236989204217947	0.0333708406516035	0.177725789554498	0.101908377615547	0.100169370457203
915	KWMTBOMO06097	CellTypeAll-M12	black	0.142266695565819	0.0850092164293831	0.118555192633561	-0.0825875	-0.111543	-0.00165269	-0.0443172	-0.0776056	0.217341003900815	0.18347049466815	0.181574513710168	0.24121094483296	0.264225923387714
916	KWMTBOMO06100	CellTypeAll-M5	brown	0.256612940386963	0.214094258674001	0.297602695049637	0.0617260307893082	0.109193830815251	0.343094735855566	-0.0588137	-0.121739	0.125076066484937	-0.113659	0.124059233943015	-0.051015	-0.0699936
917	KWMTBOMO06106	CellTypeAll-M8	blue	0.202202920293362	0.109026639917066	0.236929361165076	-0.0642832	-0.0497219	0.133145393544587	-0.0927481	-0.176662	0.299678194846443	0.038180949553415	0.219496448572181	0.121434715534146	0.123343004748421
918	KWMTBOMO06109	CellTypeAll-M2	turquoise	0.193266041332683	0.112903969475878	0.197593324012109	0.00243452450098044	0.013899386446447	0.138588667687958	-0.0224403	-0.0797348	0.166529493186997	0.0261907942620457	0.12959963582984	0.0784302721114798	0.0666899690480028
919	KWMTBOMO06110	CellTypeAll-M5	brown	0.184880135677309	0.367439378520772	0.231874444388822	-0.0614725	0.0104328575383727	0.359888204620702	0.00523371900983247	-0.177281	0.0214169887746234	-0.190498	0.192452130439128	-0.137979	-0.0662148
920	KWMTBOMO06118	CellTypeAll-M2	turquoise	0.255602645814456	0.192114985568271	0.312804450674977	-0.0118151	0.023775183477545	0.260213481659662	-0.0578691	-0.146847	0.226393957484434	-0.041385	0.176891123207285	0.0389162223915836	0.0387311179901079
921	KWMTBOMO06121	CellTypeAll-M10	purple	0.308019004901824	0.320301927868376	0.360358693386556	-0.00992496	0.0102759495890013	0.32078047759181	-0.104332	-0.1705	0.20565734517439	-0.0711149	0.241908320149315	0.0154614963556791	0.0604856891313144
922	KWMTBOMO06125	CellTypeAll-M2	turquoise	0.306342254116713	0.282306096708319	0.374701507208338	0.0111572165476916	0.0657675280131799	0.388876198565441	-0.0756414	-0.183132	0.18821492437569	-0.12528	0.194286450060105	-0.0397227	-0.0466702
923	KWMTBOMO06128	CellTypeAll-M2	turquoise	0.191742835432135	0.104425343887965	0.197769736675732	0.052261350351248	0.0710256276512283	0.166165347267297	-0.0211412	-0.0461532	0.118851273253468	-0.014732	0.0727192081253629	0.0261357352712056	0.00635864991756005
924	KWMTBOMO06140	CellTypeAll-M9	pink	0.0273808064621578	-0.102378	-0.0701532	0.0970093800069277	-0.010418	-0.123794	-0.0395683	0.170066746838681	0.00418522439714764	0.258902831691447	-0.0516468	0.1871642681793	0.101124538628205
925	KWMTBOMO06152	CellTypeAll-M3	red	0.0316048432496742	-0.089739	-0.0677084	0.200953321767574	0.0929010477081933	-0.0722357	-0.0376236	0.230132837294769	-0.0930999	0.179386990293321	-0.141765	0.120578026415921	-0.00316469
926	KWMTBOMO06157	CellTypeAll-M2	turquoise	0.186433775949247	0.110618440469351	0.237488375245819	-0.0103713	0.0113069204203488	0.173164968698949	-0.0789241	-0.123856	0.197144454607058	-0.00492751	0.139322994563734	0.0591322622583116	0.0364132836435814
927	KWMTBOMO06159	CellTypeAll-M5	brown	0.224809172103094	0.204271231997873	0.231294129018179	0.0733775301314062	0.0921698087086747	0.281389304995284	-0.0488433	-0.0776401	0.069543706474266	-0.0782288	0.106222805271753	-0.0408259	-0.0506161
928	KWMTBOMO06166	CellTypeAll-M5	brown	0.145098197886383	0.285336273944749	0.166462894884913	0.0275081478478537	0.0411139485941424	0.300585670673136	-0.0744138	-0.101882	-0.0312068	-0.14048	0.115932284233686	-0.118933	-0.0942503
929	KWMTBOMO06183	CellTypeAll-M10	purple	0.198981574661964	0.291389887536768	0.266785540152667	-0.074717	-0.0425985	0.238199956019431	-0.0696912	-0.160293	0.162979136503704	-0.0738734	0.222403489392291	-0.00149425	0.0801408617925789
930	KWMTBOMO06196	CellTypeAll-M2	turquoise	0.189311456628586	0.131765121091779	0.214626779986932	-0.00104341	0.0226692330358352	0.178169049462588	-0.0294755	-0.0939329	0.14328459280862	-0.0357299	0.118907460006097	0.0201462430812118	0.0158911524012259
931	KWMTBOMO06199	CellTypeAll-M7	green	-0.138685	-0.274321	-0.296463	0.237188538739903	0.105282491461341	-0.291128	0.0243880508701023	0.521149469415494	-0.290888	0.253520966925477	-0.382132	0.054494858371381	-0.135876
932	KWMTBOMO06202	CellTypeAll-M2	turquoise	0.283416038217753	0.12288081749481	0.303326237193994	0.081484216394717	0.120692589512398	0.273285083824693	-0.0436592	-0.093833	0.184236694775635	-0.0405802	0.108479603402751	0.0260619165799046	-0.0258589
933	KWMTBOMO06209	CellTypeAll-M5	brown	0.346188589920141	0.462208026732059	0.440244201127325	-0.00629117	0.0799772559225524	0.535779677146175	-0.0981131	-0.278312	0.181299944205003	-0.224698	0.281569628267002	-0.114558	-0.0545845
934	KWMTBOMO06216	CellTypeAll-M10	purple	0.207195272485706	0.656756616469135	0.385482019327991	-0.298043	-0.292439	0.373562441057641	-0.275551	-0.48061	0.273206470071525	-0.206885	0.570890417434688	-0.0447318	0.255751735593214
935	KWMTBOMO06217	CellTypeAll-M5	brown	0.157171548330428	0.123955856117516	0.136404129461823	0.130745028183939	0.190494693450036	0.233792814260796	0.0577736880009117	0.0119993382424868	-0.030477	-0.0960559	0.00203825775631166	-0.0855648	-0.109431
936	KWMTBOMO06218	CellTypeAll-M4	tan	0.16791919477321	-0.0394197	0.055138303091696	0.367538174463193	0.36716682912321	0.165421359345764	-0.0045825	0.176749126257935	-0.13695	-0.00206273	-0.160924	-0.0442297	-0.189655
937	KWMTBOMO06226	CellTypeAll-M2	turquoise	0.215690540659499	0.203646324436394	0.252774841189932	-0.0082028	0.0168050223437037	0.240726248863251	-0.049448	-0.134267	0.154537433644272	-0.0457165	0.162821313163658	0.0176916084305646	0.0275672439709305
938	KWMTBOMO06227	CellTypeAll-M2	turquoise	0.309135911719743	0.259650908048613	0.407423744681434	0.0171525664333732	0.078348776692938	0.377244163050761	-0.105911	-0.195007	0.259333859841404	-0.104406	0.19447086217871	-0.00237603	0.0036211475834737
939	KWMTBOMO06228	CellTypeAll-M2	turquoise	0.186901722894801	0.215709031604619	0.287812310218366	-0.0646905	-0.0146426	0.26124954773065	-0.078637	-0.18369	0.202025086736811	-0.0926355	0.164306144637431	-0.014236	0.0168265717210443
940	KWMTBOMO06229	CellTypeAll-M12	black	0.148064047769575	0.0540930171592432	0.178226544276256	-0.161867	-0.259649	-0.0701701	-0.220893	-0.259058	0.48536481680894	0.370624037666375	0.387060646320705	0.487049847886019	0.625923799504833
941	KWMTBOMO06232	CellTypeAll-M11	magenta	0.120974966617693	-0.0460271	0.0329029462896576	-0.0188876	-0.136442	-0.156322	-0.0944457	0.0260685457212778	0.244924223968974	0.417544079633279	0.147928672824481	0.474415538986648	0.431707383623737
942	KWMTBOMO06242	CellTypeAll-M11	magenta	0.0792231821043458	-0.021373	0.0382895257382033	-0.00637031	-0.0576796	-0.0482314	-0.0768015	-0.00934036	0.148502983533065	0.188956085591802	0.0853173430193303	0.227873970518551	0.158699816007915
943	KWMTBOMO06248	CellTypeAll-M5	brown	0.252543936427058	0.299143272137648	0.296513097953638	0.0113745243011616	0.0458256834699818	0.347460392023838	-0.0736707	-0.148516	0.121146490910446	-0.11369	0.169657787060352	-0.0492952	-0.0283858
944	KWMTBOMO06255	CellTypeAll-M2	turquoise	0.217808711800183	0.139982290620853	0.238208417246057	0.0403961768938044	0.0478191870255289	0.205139637624312	-0.0685908	-0.0864605	0.151015823074249	-0.0188704	0.114690816877403	0.0332288636304367	0.00702847093445376
945	KWMTBOMO06258	CellTypeAll-M8	blue	0.111200873431893	-0.0144048	0.0750095146936117	-0.139578	-0.232547	-0.132589	-0.200967	-0.137269	0.378387227450913	0.3758226957626	0.279019233852602	0.448004968402314	0.46166215701193
946	KWMTBOMO06272	CellTypeAll-M8	blue	0.112546611271277	0.0386385078177362	0.25360563935189	-0.395057	-0.329204	0.0260942767972429	-0.241066	-0.609079	0.699608075649579	0.112835769737073	0.55518072089977	0.322971438133226	0.431665270441084
947	KWMTBOMO06273	CellTypeAll-M2	turquoise	0.27725259298711	0.178246999343222	0.286856305114372	0.0330474747523352	0.0295270290622762	0.221567115927284	-0.0794919	-0.0997779	0.196713152279217	-0.00702617	0.156353384512834	0.0591550607639329	0.043358701230747
948	KWMTBOMO06290	CellTypeAll-M6	yellow	0.142474471595362	0.0937921813401967	0.187137456510243	0.0216199756601848	0.160951965497343	0.245605328540398	0.137865467556946	-0.0755952	0.0645714299570711	-0.151595	0.027526972879467	-0.100196	-0.111233
949	KWMTBOMO06292	CellTypeAll-M8	blue	0.187935249140157	0.117395286778619	0.398606045030432	-0.427983	-0.317502	0.182576385677005	-0.255269	-0.704972	0.74594120249921	-0.0159364	0.586439378636578	0.236613356075757	0.324976453006741
950	KWMTBOMO06293	CellTypeAll-M8	blue	0.188590564314931	0.10856672105974	0.32087495824703	-0.177471	-0.106858	0.227420329947244	-0.126226	-0.338736	0.408824319330126	-0.0719194	0.281765721912467	0.0558635520130698	0.0509822414223089
951	KWMTBOMO06294	CellTypeAll-M8	blue	0.202056292443069	0.099285875442397	0.351859862026001	-0.22647	-0.1494	0.224057323846789	-0.157469	-0.417068	0.501332975949491	-0.059219	0.350580101431493	0.0963488665106032	0.0956895293818507
952	KWMTBOMO06297	CellTypeAll-M6	yellow	-0.0679558	-0.060876	-0.0672023	-0.0347569	0.101614814579854	-0.0453612	0.400615269886391	0.0773175047807394	-0.0874046	-0.0679413	-0.0809205	-0.0845851	-0.00160999
953	KWMTBOMO06298	CellTypeAll-M8	blue	0.0884685227941211	0.00242341996454393	0.0693805815167903	-0.0439763	-0.0776041	-0.0257904	-0.08624	-0.0833512	0.203206093387947	0.164748736414672	0.154993546827844	0.20279308840979	0.175075486632243
954	KWMTBOMO06300	CellTypeAll-M4	tan	0.16480439125804	0.0577772332669984	0.0720710750328821	0.509351656636886	0.609183280647773	0.337951014816161	0.179472015668522	0.271886100521883	-0.34467	-0.230368	-0.271881	-0.297475	-0.409503
955	KWMTBOMO06311	CellTypeAll-M1	greenyellow	0.106711404551136	0.58400303865484	0.226419583415255	-0.233977	-0.23832	0.318434075448312	-0.176166	-0.332153	0.0384801757890565	-0.248937	0.3863688757618	-0.16524	0.0662481396061546
956	KWMTBOMO06314	CellTypeAll-M2	turquoise	0.155838297919956	0.107490491538897	0.173650314668457	-0.0372737	-0.0460791	0.105858275671036	-0.0757705	-0.101611	0.182224374824641	0.0500488056967195	0.148045564908994	0.102399153230552	0.0874820568875934
957	KWMTBOMO06316	CellTypeAll-M5	brown	0.253148156211671	0.307205899179535	0.291398619991103	0.00769792314327996	0.0687176979563618	0.361713172036084	-0.0318623	-0.149935	0.0968239456199401	-0.14213	0.168417225539022	-0.0798849	-0.0443715
958	KWMTBOMO06325	CellTypeAll-M8	blue	0.0637403347912741	0.0178048658573324	0.114829284344759	-0.140858	-0.115537	0.0137207956059808	-0.101788	-0.226196	0.265887532415257	0.0516009423698538	0.258205462498589	0.129645188910335	0.140310317528425
959	KWMTBOMO06330	CellTypeAll-M5	brown	0.25345587645869	0.387958097050244	0.281243138142536	-0.000643827	0.0753220136097912	0.393083364609577	0.0430039042757328	-0.147791	0.030538618781169	-0.196854	0.182379194883931	-0.138943	-0.0557572
960	KWMTBOMO06332	CellTypeAll-M8	blue	0.204793508295189	0.106470395931728	0.198779444998773	-0.0057964	-0.0414663	0.114082899626329	-0.104678	-0.0878969	0.215806947705154	0.0982799805188949	0.157554101584378	0.156968444448462	0.124193296562249
961	KWMTBOMO06334	CellTypeAll-M8	blue	0.19032817725116	0.236873974893054	0.433089578714441	-0.519857	-0.395189	0.196609722430607	-0.271585	-0.797738	0.802282033232062	-0.028025	0.694986651581408	0.256933185961639	0.444715380224494
962	KWMTBOMO06344	CellTypeAll-M2	turquoise	0.48795229622455	0.390341502473062	0.527950767258767	0.0253526935520817	0.0587984750343347	0.467742844269095	-0.144939	-0.244342	0.316097168448638	-0.105072	0.309932326739357	0.0267112289052697	0.0427610482450607
963	KWMTBOMO06347	CellTypeAll-M1	greenyellow	0.294387952040619	0.406628057421337	0.315870789539559	-0.072397	-0.0635939	0.310513704551034	-0.0914732	-0.197658	0.151925429183796	-0.0957908	0.270006567584106	-0.0183104	0.0514024578926813
964	KWMTBOMO06360	CellTypeAll-M7	green	0.0134207524696438	-0.218986	-0.181375	0.281725008845984	0.0935974533943842	-0.21932	-0.0429862	0.454181918245607	-0.15814	0.356996275728543	-0.261896	0.215858529528924	0.0346810548671562
965	KWMTBOMO06369	CellTypeAll-M2	turquoise	0.230513605756089	0.29370478893942	0.299911971713205	-0.0204126	0.00634086259157468	0.287602665325658	-0.0860597	-0.157036	0.170754622957967	-0.0761296	0.196367121949282	-0.00649924	0.0401367032168025
966	KWMTBOMO06373	CellTypeAll-M8	blue	0.129176250080095	0.0422069178252988	0.165404351062721	-0.239143	-0.24768	-0.0390374	-0.187807	-0.31833	0.479022925548902	0.245821986518866	0.384561935036185	0.384781207911683	0.401743893446887
967	KWMTBOMO06376	CellTypeAll-M8	blue	0.154607581492861	0.0602810581800443	0.155258869252182	-0.0790221	-0.0944209	0.0338371083545913	-0.0899132	-0.131885	0.285413315094144	0.160831786027797	0.203891638709211	0.231479402207279	0.210878391733343
968	KWMTBOMO06377	CellTypeAll-M9	pink	0.0459132675386481	-0.127391	-0.0859208	0.121077022748835	-0.0598316	-0.195683	-0.168232	0.173040738998717	0.0872054290897997	0.438256775570439	0.00736129119951366	0.366012319266025	0.234289657448086
969	KWMTBOMO06397	CellTypeAll-M2	turquoise	0.185891288583502	0.262337839256182	0.268854478871739	-0.0777781	-0.0367319	0.258833606137523	-0.0663086	-0.175476	0.157416344932211	-0.0958632	0.181576026264698	-0.0257428	0.0289145716031861
970	KWMTBOMO06399	CellTypeAll-M8	blue	0.21502265182662	0.117530454657874	0.214550969536577	-0.0306297	-0.0584593	0.109566934736446	-0.102965	-0.0963563	0.250692822632973	0.106636022364376	0.171058755864608	0.168622656519397	0.136202782376604
971	KWMTBOMO06401	CellTypeAll-M9	pink	0.0622745511166274	-0.112175	-0.0621107	0.0621450786465112	-0.113547	-0.218753	-0.149744	0.120680205794314	0.159091356179274	0.488805126996869	0.0699958894383833	0.445321645477973	0.376218958742386
972	KWMTBOMO06402	CellTypeAll-M2	turquoise	0.247820710417427	0.156194256696942	0.249994108301222	0.0823026775364575	0.0943258242961436	0.225503075948302	-0.0393037	-0.053959	0.120307929417329	-0.0328734	0.0958020416555438	0.0185585961985773	-0.00492918
973	KWMTBOMO06427	CellTypeAll-M10	purple	0.169568121073937	0.208585639297782	0.228613794314967	-0.215096	-0.210295	0.0600229450273119	-0.0853766	-0.322882	0.426920636676064	0.158759141712451	0.46007598795026	0.289201385140593	0.425420758894773
974	KWMTBOMO06430	CellTypeAll-M2	turquoise	0.197893902546669	0.137100714830632	0.216043458490655	-0.00928844	-0.0057418	0.151098668028969	-0.0652655	-0.101445	0.1769164542566	0.0182366675466473	0.149781265239745	0.076970297894245	0.0746673034325228
975	KWMTBOMO06434	CellTypeAll-M8	blue	0.211929150829404	0.109115787463694	0.228534166224609	-0.0316033	-0.0299163	0.129690507101098	-0.0739526	-0.132019	0.268974747878651	0.0773406041785869	0.187776812511611	0.155556223021489	0.143248265692232
976	KWMTBOMO06453	CellTypeAll-M1	greenyellow	0.224145447851176	0.438135933416154	0.28523483362627	-0.0648168	-0.0376287	0.411565917274115	-0.103401	-0.232453	0.0530117299008723	-0.201441	0.242125538546296	-0.138038	-0.0877348
977	KWMTBOMO06456	CellTypeAll-M2	turquoise	0.193407696644817	0.111758690638232	0.204317915258636	-0.0310303	-0.0350117	0.122814745193377	-0.0600422	-0.100261	0.193013398213452	0.0397484035110712	0.14535149217352	0.0984619784876152	0.0823951479203801
978	KWMTBOMO06457	CellTypeAll-M2	turquoise	0.249827626215861	0.214494921487514	0.299162567449293	-0.0386127	-0.00389862	0.244170285850321	-0.0629479	-0.166552	0.218282333665659	-0.0463921	0.193768538016509	0.0377106481188283	0.043208641391813
979	KWMTBOMO06458	CellTypeAll-M5	brown	0.17285089639295	0.114872137407487	0.150329106122849	0.155983287365908	0.19268858128787	0.248992928663187	0.0278115045527571	0.0157469587507079	-0.0316866	-0.093835	-0.00890648	-0.0815941	-0.116604
980	KWMTBOMO06460	CellTypeAll-M5	brown	0.172512269661702	0.0776154295675792	0.148091699401913	0.205078885982356	0.287597852476086	0.275914715203721	0.0927145284071415	0.0418016679019372	-0.0576665	-0.13206	-0.064843	-0.120498	-0.175872
981	KWMTBOMO06461	CellTypeAll-M2	turquoise	0.24519098674115	0.213717303313758	0.29498895626338	-0.0880699	-0.071049	0.201525733716227	-0.0824014	-0.178023	0.245108129998043	-0.0210277	0.219470773119238	0.0725606676354501	0.0908881660492726
982	KWMTBOMO06476	CellTypeAll-M2	turquoise	0.260522376004375	0.21032479678843	0.312647425089806	-0.0366263	-0.0162732	0.237796362161184	-0.0818674	-0.162169	0.235516357112395	-0.0353892	0.199181591860212	0.0526790183670546	0.0608241842713222
983	KWMTBOMO06480	CellTypeAll-M12	black	0.020474081815114	-0.0121017	-0.00624288	-0.184178	-0.312272	-0.236576	-0.15156	-0.157982	0.339109494581019	0.443506640010832	0.316740737686897	0.508011831000304	0.686947871984531
984	KWMTBOMO06482	CellTypeAll-M2	turquoise	0.25927515274775	0.195970086507278	0.292865902069603	0.0441632237901472	0.0661032778374137	0.261953559478919	-0.0565356	-0.111936	0.180515114275589	-0.0472124	0.150252458850292	0.0190895698433114	0.0208545147811904
985	KWMTBOMO06490	CellTypeAll-M4	tan	0.106391779368958	-0.0657047	0.038286706591708	0.337111669500437	0.451477596576428	0.183992615488927	0.135893110038957	0.177403475446069	-0.164456	-0.107879	-0.196429	-0.140692	-0.241256
986	KWMTBOMO06496	CellTypeAll-M2	turquoise	0.299400347048231	0.251120237220216	0.337144979611827	0.00490082092080181	0.0264478105717032	0.301950602577124	-0.0774718	-0.171509	0.217787383058643	-0.0524524	0.216352905535914	0.0294479724380428	0.0455472352339573
987	KWMTBOMO06497	CellTypeAll-M3	red	0.142890185655422	-0.0303514	0.0692634996780014	0.305456623156778	0.262579434833428	0.136592840365944	-0.0256616	0.156389128466493	-0.0773629	0.0122508317575169	-0.123042	-0.0176874	-0.131545
988	KWMTBOMO06501	CellTypeAll-M5	brown	0.241440666502458	0.347833528173047	0.258808127689124	0.111992664034065	0.172920377186948	0.425175825388703	-0.00723608	-0.086243	-0.0361482	-0.201266	0.101955134797633	-0.165893	-0.146407
989	KWMTBOMO06507	CellTypeAll-M2	turquoise	0.228181618340401	0.172486807234026	0.277342501885722	0.0289031658073603	0.0508838847920188	0.235736774487432	-0.0872979	-0.108795	0.178444525276471	-0.0324615	0.132002711836727	0.0330713666073827	0.0221526782389887
990	KWMTBOMO06509	CellTypeAll-M2	turquoise	0.20463982774917	0.171579576245915	0.247448729924215	-0.0559082	-0.031195	0.177794019524032	-0.0624215	-0.152069	0.205771201093806	-0.0201841	0.174088354472095	0.0546844108241002	0.0618336810349367
991	KWMTBOMO06523	CellTypeAll-M3	red	0.19589455485894	0.0551007344302466	0.121186305793061	0.253818726131646	0.160497899268898	0.148144728760228	-0.0844109	0.0933762320368949	-0.00338889	0.0604958746542106	-0.0135973	0.0495223084724157	-0.0429293
992	KWMTBOMO06524	CellTypeAll-M10	purple	0.266015419776227	0.377075003480177	0.341402791262639	-0.0732742	-0.0987005	0.256114829943061	-0.167603	-0.237541	0.300100103527915	0.0331960386736721	0.358905265347996	0.139775528921931	0.250753078823439
993	KWMTBOMO06531	CellTypeAll-M5	brown	0.211613115431881	0.20217955683782	0.24333208554349	0.093508723942048	0.19799005455864	0.366649326401951	0.0610613228554971	-0.0731018	0.0224300980888584	-0.178076	0.0509216125655742	-0.135091	-0.146478
994	KWMTBOMO06532	CellTypeAll-M5	brown	0.271443904579059	0.428325370425957	0.368302072479486	-0.0360963	0.0816061637248298	0.507688908375341	-0.0212117	-0.240378	0.0995625309480043	-0.264471	0.217755470884818	-0.176081	-0.108375
995	KWMTBOMO06535	CellTypeAll-M10	purple	0.183553554405239	0.33762990639359	0.281210432224076	-0.141212	-0.114968	0.248340554539582	-0.108693	-0.233478	0.184825424475071	-0.113172	0.343783956595529	-0.0266261	0.0943066342276532
996	KWMTBOMO06538	CellTypeAll-M7	green	0.0444723315484395	-0.0931137	-0.0685929	0.171614061653825	0.0455364599618066	-0.0988699	-0.0400959	0.24320120502988	-0.0652183	0.225007484697679	-0.121149	0.150882569169736	0.0325888555893784
997	KWMTBOMO06542	CellTypeAll-M5	brown	0.140677805752774	0.150195126594827	0.148097173787168	0.0416037094727459	0.073427720256392	0.199703715661387	0.00908505873282098	-0.0503635	0.0242038080788171	-0.0760823	0.0655898408084115	-0.0504776	-0.0457715
998	KWMTBOMO06558	CellTypeAll-M11	magenta	0.127725298851713	-0.0323314	0.050964230444851	-0.00856746	-0.0938858	-0.0806593	-0.0796351	-0.00168674	0.213684582782339	0.306670984129601	0.131743631732877	0.359825198956154	0.273601513747226
999	KWMTBOMO06559	CellTypeAll-M2	turquoise	0.22163441090514	0.140717472250671	0.232142978817902	0.0296898449217204	0.0388831761561641	0.188241491726973	-0.0480062	-0.0785495	0.14365258481416	-0.0230466	0.112972862997268	0.0301840663012275	0.0155002591314519
1000	KWMTBOMO06561	CellTypeAll-M8	blue	0.212047635253102	0.100562374354226	0.223036608750257	-0.0699987	-0.0803531	0.101382654599994	-0.113446	-0.167581	0.321399823934178	0.121117973093713	0.236466482584507	0.2079405845607	0.184550916897072
1001	KWMTBOMO06566	CellTypeAll-M9	pink	0.0565013077842576	-0.17858	-0.103847	0.172384167452186	-0.0115435	-0.209431	-0.0869472	0.247451429243127	0.0351048654511049	0.437203279071245	-0.0687375	0.349324204430909	0.220895817418751
1002	KWMTBOMO06567	CellTypeAll-M6	yellow	0.0154895294145886	-0.037521	-0.048013	-0.0372842	-0.0340761	-0.0869577	0.130356658475581	0.0967085404073907	0.00199509955618017	0.128816797410663	-0.0114032	0.0921941970651054	0.102986037485932
1003	KWMTBOMO06573	CellTypeAll-M2	turquoise	0.185089159534944	0.177688656003906	0.234990267597209	0.0105406030201353	0.0643355218451249	0.250483945597464	-0.025321	-0.112235	0.114527396753007	-0.0943096	0.112316301765423	-0.0398419	-0.0362687
1004	KWMTBOMO06578	CellTypeAll-M8	blue	0.228003584797981	0.176192324833668	0.267568312941083	-0.083777	-0.0750258	0.155304972947763	-0.102586	-0.176619	0.287679536798947	0.0316061672240774	0.229451465623726	0.123840700237798	0.134397408125541
1005	KWMTBOMO06580	CellTypeAll-M2	turquoise	0.249489250576763	0.225748477612898	0.334009997181338	-0.00962316	0.0485091613006989	0.332946313011724	-0.0597084	-0.180797	0.198081964221464	-0.109733	0.17561011407068	-0.0270232	-0.0231294
1006	KWMTBOMO06586	CellTypeAll-M2	turquoise	0.178986208033843	0.125120665985877	0.242747459452115	-0.0922975	-0.0593102	0.171792961396671	-0.0622822	-0.185419	0.242253231363405	-0.0297937	0.175731473666129	0.0534459906636124	0.0478328830518411
1007	KWMTBOMO06588	CellTypeAll-M2	turquoise	0.296211920604101	0.198081759895429	0.347216535894586	-0.00544688	0.0175906972600176	0.286220572175825	-0.0911919	-0.168608	0.248900050796151	-0.0408815	0.187637936322704	0.0471968564750373	0.0187644300760706
1008	KWMTBOMO06589	CellTypeAll-M2	turquoise	0.205246972869448	0.149108670744602	0.243616305631593	-0.0016252	0.0111764891799807	0.184209162333055	-0.072308	-0.114843	0.187585765414932	-0.0128639	0.145954946839752	0.0520326038373713	0.0499107481270922
1009	KWMTBOMO06598	CellTypeAll-M2	turquoise	0.214964929556463	0.0839365854259703	0.224106220613301	0.0573965734468495	0.0463702717927945	0.15147778691394	-0.0972026	-0.0579212	0.184227937006365	0.0543395565835395	0.106965478247761	0.0996539910319562	0.0440964596655314
1010	KWMTBOMO06607	CellTypeAll-M10	purple	0.292308918685146	0.29038801488054	0.314154376506156	-0.00711515	0.00903753294430512	0.271371911700332	-0.0671675	-0.137072	0.186011237005281	-0.0455542	0.213867020093228	0.0342629927334541	0.0785644512667601
1011	KWMTBOMO06608	CellTypeAll-M8	blue	0.236664456967058	0.153191829687357	0.276130188829179	-0.0877198	-0.0724561	0.159386241408717	-0.0988216	-0.187587	0.332880948724156	0.068820675487859	0.24414318781702	0.165064687457397	0.159551702617982
1012	KWMTBOMO06611	CellTypeAll-M3	red	0.160209496639738	-0.131374	-0.00194314	0.503953093253552	0.444293874704247	0.0874630472598143	0.0459064657389501	0.343175339974348	-0.208824	0.079325903944067	-0.262366	-0.00546126	-0.180234
1013	KWMTBOMO06619	CellTypeAll-M2	turquoise	0.490553356638532	0.324504056876067	0.502021233981561	0.127125571062462	0.202777371181612	0.487984995866899	-0.0236738	-0.174858	0.239775381504441	-0.15651	0.192625617021188	-0.0366002	-0.0515608
1014	KWMTBOMO06633	CellTypeAll-M12	black	0.0396892251175125	-0.0421155	0.0342645641880346	-0.180603	-0.229146	-0.142547	-0.166946	-0.253217	0.395072720734376	0.294423635600411	0.335233942164898	0.381699695525889	0.430671350365917
1015	KWMTBOMO06634	CellTypeAll-M11	magenta	0.120280180053947	-0.0657367	0.0637798435663016	-0.0639593	-0.177192	-0.138336	-0.226731	-0.112203	0.369467075436034	0.420772622671793	0.253354739452087	0.517429920509059	0.413519003718771
1016	KWMTBOMO06644	CellTypeAll-M3	red	0.102493569088304	-0.1425	-0.0833267	0.619074341741983	0.476365577570277	0.0619930548299086	0.0216410973034327	0.464391412018041	-0.338951	0.123945065428981	-0.370355	-0.0104717	-0.23812
1017	KWMTBOMO06645	CellTypeAll-M7	green	-0.248501	-0.285689	-0.337322	-0.0177841	-0.0829227	-0.363294	0.029057220854576	0.419915842968418	-0.240674	0.142805225388412	-0.330416	-0.039825	-0.13809
1018	KWMTBOMO06646	CellTypeAll-M7	green	-0.0167136	-0.335902	-0.283138	0.640587805400791	0.414739980082447	-0.184389	0.0603934255849451	0.719082048256872	-0.46023	0.295293323677854	-0.551356	0.0598472227412889	-0.234833
1019	KWMTBOMO06657	CellTypeAll-M1	greenyellow	0.278312999209768	0.576955652388216	0.391825813056754	-0.244629	-0.210319	0.42186615769354	-0.174656	-0.40662	0.22134204261072	-0.192402	0.436222628548124	-0.0702752	0.0536810684135008
1020	KWMTBOMO06659	CellTypeAll-M2	turquoise	0.305525804324223	0.193828144344482	0.328063533033392	-0.00377869	-0.0170541	0.20507218327699	-0.124281	-0.136466	0.276620526541971	0.0356745657224531	0.213334531643833	0.123861299045451	0.105017293580061
1021	KWMTBOMO06660	CellTypeAll-M9	pink	0.109904634495676	-0.0801351	-0.0149128	0.161881393850266	0.0181236067780962	-0.0957602	-0.078521	0.194726894891226	0.0481807216085973	0.33579342041164	-0.0359976	0.260909981356237	0.138802223912996
1022	KWMTBOMO06666	CellTypeAll-M7	green	-0.202315	-0.461662	-0.447663	0.486465926012525	0.25123828623586	-0.387615	0.0252958179875539	0.786900099808888	-0.519193	0.292731620987949	-0.643074	0.0153497372987784	-0.261184
1023	KWMTBOMO06667	CellTypeAll-M7	green	-0.37424	-0.538992	-0.565008	0.291229560532759	0.293557184922591	-0.481945	0.475690515076632	0.790526325931323	-0.616696	0.123424005638842	-0.724976	-0.158613	-0.320953
1024	KWMTBOMO06668	CellTypeAll-M7	green	-0.228761	-0.501445	-0.482376	0.501886151696742	0.326605646255761	-0.399968	0.154589371720374	0.8281700011655	-0.567388	0.263705472948566	-0.69424	-0.014755	-0.287029
1025	KWMTBOMO06670	CellTypeAll-M7	green	-0.155156	-0.500727	-0.447591	0.729825408959976	0.470512040586194	-0.309812	0.0234523121690014	0.872030651592494	-0.647261	0.265555103591084	-0.758251	-0.02443	-0.369286
1026	KWMTBOMO06671	CellTypeAll-M7	green	-0.00333128	-0.228086	-0.199614	0.388226103382617	0.150978895715706	-0.189611	-0.0803512	0.479883794043629	-0.23423	0.321810972848412	-0.320307	0.175132925009596	-0.0430326
1027	KWMTBOMO06674	CellTypeAll-M7	green	0.0262342055767499	-0.125609	-0.0991019	0.262143028226789	0.115641266417224	-0.0968587	-0.0450012	0.283144211136116	-0.124573	0.212945700980411	-0.177878	0.132320695358508	-0.0113382
1028	KWMTBOMO06682	CellTypeAll-M6	yellow	-0.0798387	-0.10439	-0.032095	-0.174755	0.090593584855342	0.00178056787070538	0.538495436401617	-0.0130866	-0.0439978	-0.218849	-0.130034	-0.188971	-0.1236
1029	KWMTBOMO06684	CellTypeAll-M7	green	-0.371458	-0.508714	-0.527828	0.218571898683398	0.273732466263279	-0.445894	0.485854536689781	0.715269710253708	-0.586047	0.0720946900050589	-0.717006	-0.187073	-0.352339
1030	KWMTBOMO06685	CellTypeAll-M6	yellow	-0.367392	-0.413153	-0.444563	0.0257964264112975	0.248302507477008	-0.363755	0.76714396482914	0.521431813789028	-0.484213	-0.0750509	-0.568229	-0.257662	-0.271345
1031	KWMTBOMO06686	CellTypeAll-M7	green	-0.343436	-0.501934	-0.488455	0.190573655613813	0.292942214587132	-0.39892	0.611359739493223	0.67249444861669	-0.557481	0.0192358726071222	-0.699582	-0.210738	-0.346151
1032	KWMTBOMO06689	CellTypeAll-M6	yellow	-0.150337	-0.129873	-0.157058	-0.0819452	-0.00339057	-0.147464	0.252008839766976	0.167938652570077	-0.137714	-0.0534832	-0.165904	-0.11856	-0.0916799
1033	KWMTBOMO06700	CellTypeAll-M6	yellow	-0.109095	-0.113889	-0.079547	-0.140626	0.178972720857423	-0.000526245	0.701863270169696	0.00764206224463185	-0.125823	-0.242002	-0.167734	-0.23045	-0.130688
1034	KWMTBOMO06706	CellTypeAll-M2	turquoise	0.165749945950815	0.076469875853495	0.167091596370113	0.0519507034883309	0.0465143323719958	0.132236295979951	-0.0395439	-0.036002	0.121381380104059	0.0231689951783342	0.076020537119346	0.0530086462386745	0.0231861381390096
1035	KWMTBOMO06721	CellTypeAll-M12	black	0.035740582137753	0.00256631210257264	0.0469449133947634	-0.221842	-0.253306	-0.167314	-0.0208379	-0.235752	0.383562241269555	0.351721077586027	0.347839850209559	0.455316304381892	0.660791684068587
1036	KWMTBOMO06732	CellTypeAll-M8	blue	0.364239348540016	0.171737133279653	0.379196998536244	-0.0518443	-0.092399	0.172924903095862	-0.175881	-0.253053	0.518933881964434	0.20509484468488	0.372972243137575	0.349261746551601	0.361984897391266
1037	KWMTBOMO06733	CellTypeAll-M8	blue	0.180975688771123	0.0734488593902682	0.18204234635508	-0.0653138	-0.089401	0.0540707424143148	-0.113743	-0.127244	0.292500175372917	0.153407322929396	0.19940351488552	0.225703437670782	0.191094109414465
1038	KWMTBOMO06742	CellTypeAll-M3	red	0.122915011594249	-0.0987462	-0.0232982	0.365560568691842	0.24589256626054	0.0211681457175707	0.0267498702713703	0.277611782661455	-0.145533	0.118216971617291	-0.1887	0.0518468254897941	-0.0711215
1039	KWMTBOMO06750	CellTypeAll-M8	blue	0.138376097340803	0.0364498444734794	0.145251657726997	-0.0825752	-0.0903009	0.0340504086086237	-0.0936804	-0.13432	0.269347621471837	0.130838636343347	0.185545876367917	0.198597023215389	0.164060316498544
1040	KWMTBOMO06751	CellTypeAll-M1	greenyellow	0.277595789581321	0.367838912173244	0.367877352977029	-0.0802766	-0.0398502	0.355872725928588	-0.108472	-0.249787	0.232319005703655	-0.118578	0.276645350349212	-0.0190364	0.0386698770182682
1041	KWMTBOMO06758	CellTypeAll-M8	blue	0.242289541332146	0.154988296957368	0.280142240904249	-0.0407773	-0.0344665	0.181487596111343	-0.0988215	-0.154104	0.282553521499822	0.0376784333046026	0.206559970564031	0.123501176097497	0.109970519247107
1042	KWMTBOMO06760	CellTypeAll-M11	magenta	0.184063169965073	-0.0202698	0.106655266448192	0.0474724793482245	-0.0681279	-0.0526254	-0.141638	0.000279097540643128	0.275548457381033	0.337104862185197	0.168477584757553	0.391546474079492	0.283168909822302
1043	KWMTBOMO06762	CellTypeAll-M8	blue	0.130270391567853	0.0357599885491166	0.14080173769099	-0.155622	-0.169463	-0.0191829	-0.148447	-0.201411	0.367908322792539	0.207616896294624	0.272424635223994	0.302657463898146	0.287716983533837
1044	KWMTBOMO06763	CellTypeAll-M10	purple	0.11290919175936	0.0804450658524115	0.127216397764821	-0.111805	-0.0857499	-0.000618857	0.0975306478775209	-0.127576	0.26782481295367	0.111081633763113	0.271667329762414	0.17618466241132	0.294907956614742
1045	KWMTBOMO06766	CellTypeAll-M8	blue	0.432329599458025	0.310912460665471	0.577569773826737	-0.215012	-0.178958	0.341431244188357	-0.281089	-0.434574	0.651540923057738	0.0188806544205235	0.464127335368556	0.226490623218395	0.265696469207402
1046	KWMTBOMO06770	CellTypeAll-M8	blue	0.138099434510549	0.0728352995933459	0.155141153240458	-0.128493	-0.138584	0.0142634760451613	-0.127713	-0.202002	0.338375234882684	0.16357299117531	0.279794754819138	0.252180918819742	0.263610123365291
1047	KWMTBOMO06771	CellTypeAll-M8	blue	0.046082676796841	-0.0111663	0.086085535810306	-0.201036	-0.186086	-0.0552497	-0.129455	-0.296814	0.385588877012714	0.159622541317529	0.333856053645585	0.251187320561209	0.288577422677144
1048	KWMTBOMO06772	CellTypeAll-M11	magenta	0.129140220802883	-0.0359957	0.0809723809042164	-0.0663861	-0.156729	-0.0914154	-0.20405	-0.129684	0.338506474590625	0.351767776947112	0.24026264939758	0.45666741057019	0.363698974635364
1049	KWMTBOMO06777	CellTypeAll-M2	turquoise	0.213352478762432	0.251786929800993	0.315719	-0.106317	-0.0681062	0.264727187046111	-0.0887615	-0.218218	0.234770273401115	-0.088808	0.261153773986533	0.00345020456712155	0.0499449158519773
1050	KWMTBOMO06780	CellTypeAll-M8	blue	0.163654412330337	0.0402955111321358	0.148891877289827	-0.0357146	-0.0777195	0.0264373529508037	-0.106407	-0.0784015	0.255242915043168	0.176490856140535	0.162452491010326	0.229984112771092	0.179767424032822
1051	KWMTBOMO06783	CellTypeAll-M8	blue	0.270893383322986	0.179352495081159	0.349307444487659	-0.119779	-0.088524	0.21061220027019	-0.132044	-0.250718	0.394053606858821	0.0260449952501335	0.28581583091997	0.146601282653122	0.143100804083125
1052	KWMTBOMO06798	CellTypeAll-M6	yellow	0.0949211703974727	0.00702074700954348	0.0641224120868469	0.0806533032755395	0.117148822152463	0.075209546160967	0.100286832783666	0.0536174877486287	0.00113486686737297	-0.00675568	-0.0323265	-0.00659201	-0.0318072
1053	KWMTBOMO06801	CellTypeAll-M11	magenta	0.118277572913592	-0.0106885	0.0800502905973552	-0.0234425	-0.0829179	-0.0423497	-0.120508	-0.0623872	0.226823280824369	0.233297605505514	0.149307287792296	0.309697953701773	0.229078708099358
1054	KWMTBOMO06803	CellTypeAll-M8	blue	0.162743821097532	0.0980541093386858	0.192932424434912	-0.102088	-0.102213	0.0805799502575928	-0.103724	-0.179206	0.299394663960625	0.0973328364871422	0.235944284586295	0.17739519627363	0.177225179268128
1055	KWMTBOMO06820	CellTypeAll-M6	yellow	-0.136239	-0.10421	-0.13109	-0.0744186	0.11367005155271	-0.0926581	0.59459409857205	0.130145695924202	-0.165237	-0.129724	-0.143813	-0.159311	-0.0281444
1056	KWMTBOMO06821	CellTypeAll-M4	tan	0.171356415501235	-0.0577369	0.0493854009407848	0.365404842533972	0.458036214510258	0.186106001587267	0.246456417096178	0.217177681362755	-0.182919	-0.100403	-0.216553	-0.132834	-0.226873
1057	KWMTBOMO06823	CellTypeAll-M2	turquoise	0.280268943925237	0.148813167372583	0.31817228292973	0.0395991372191539	0.0537621266349667	0.248764478752288	-0.0927456	-0.121205	0.238804913691809	0.00117346693139722	0.164139672125725	0.0751595447638827	0.034049076731454
1058	KWMTBOMO06827	CellTypeAll-M3	red	0.176254825397448	0.0176903998461635	0.0558456213022168	0.374999652946912	0.252101840650458	0.159506788620048	-0.0749806	0.183281708166884	-0.150966	0.0195235357869271	-0.116334	-0.0245952	-0.139738
1059	KWMTBOMO06834	CellTypeAll-M2	turquoise	0.18681037701737	0.172165948049391	0.231185201816928	-0.0203437	0.00476057013197333	0.199831861008598	-0.0469974	-0.120128	0.152745351399041	-0.0489362	0.136651654867526	0.00911404994050939	0.0218521489151307
1060	KWMTBOMO06835	CellTypeAll-M8	blue	0.199462912906157	0.089446206454333	0.206013619329361	-0.0478335	-0.0574647	0.0926198391876676	-0.088132	-0.125171	0.265352536886209	0.0946303353038366	0.186964592816078	0.167873941249975	0.143576841985961
1061	KWMTBOMO06836	CellTypeAll-M9	pink	0.0312679478912005	-0.120913	-0.0752101	0.0951189848180026	-0.0388035	-0.157241	-0.103083	0.157393763677158	0.0534300315946848	0.339230357583019	-0.0243993	0.266631993446204	0.149037716488755
1062	KWMTBOMO06840	CellTypeAll-M6	yellow	-0.0343923	-0.245919	-0.146638	0.350464015448597	0.533386000085318	0.00727865325098168	0.546227440119278	0.383091364246026	-0.335486	-0.103045	-0.395785	-0.196422	-0.283292
1063	KWMTBOMO06856	CellTypeAll-M8	blue	0.204096131890008	0.154401244449016	0.242024530931899	-0.0714526	-0.0542578	0.147083311919597	-0.0742075	-0.165896	0.264737584006488	0.0240290928633627	0.207268120340392	0.110575589053166	0.126280925648728
1064	KWMTBOMO06858	CellTypeAll-M8	blue	0.179341937813738	0.0981713523809536	0.197615600729491	-0.0743404	-0.065372	0.0931510885914625	-0.0591594	-0.128498	0.255515398916602	0.0605947566572887	0.178103454071638	0.133635279993151	0.133548892304259
1065	KWMTBOMO06872	CellTypeAll-M3	red	0.114950235288132	-0.115114	-0.0414074	0.452109910064888	0.251494797561819	0.0148960048650252	-0.0739415	0.279303986897314	-0.149038	0.151034362033942	-0.185839	0.0693468234649971	-0.0859264
1066	KWMTBOMO06883	CellTypeAll-M2	turquoise	0.209286760727729	0.210536308383442	0.28778892747416	-0.0441814	-0.00909079	0.241702643782484	-0.0815842	-0.15768	0.201434714677074	-0.0621577	0.166810617850647	0.0115618713980209	0.0269488658702468
1067	KWMTBOMO06891	CellTypeAll-M9	pink	0.0860477461806224	-0.0917343	-0.0149737	0.0988573625857032	-0.0262873	-0.110661	-0.112766	0.0941567335028597	0.11748028388892	0.343682023783106	0.0306015189529238	0.313423992339493	0.199829611736961
1068	KWMTBOMO06893	CellTypeAll-M9	pink	0.0386676508584517	-0.119274	-0.0734364	0.110491472861503	-0.00926501	-0.14374	-0.0420218	0.184920174439987	0.0178779236621373	0.311596343603163	-0.0556412	0.245531638482999	0.158292336076904
1069	KWMTBOMO06913	CellTypeAll-M11	magenta	0.259130477654963	0.0235143490794952	0.17112168955867	0.0878469324532666	-0.0227845	0.016108684341328	-0.131653	0.00375421239141801	0.267380677857947	0.331234185030801	0.165672131179685	0.398397561008627	0.321188150393646
1070	KWMTBOMO06914	CellTypeAll-M2	turquoise	0.323713938845027	0.222575764043515	0.380913857051926	-0.00530979	0.024659687081404	0.296757440416226	-0.101379	-0.175688	0.276157966615543	-0.0373274	0.213159223126258	0.0613551573233721	0.050406270990337
1071	KWMTBOMO06915	CellTypeAll-M2	turquoise	0.286735793853158	0.134140072891771	0.294955653056071	0.0478124475644393	0.0431764248353727	0.206215612900171	-0.090272	-0.08234	0.224190869495406	0.0301715793949336	0.138716926569577	0.0974575274375335	0.0490179499439854
1072	KWMTBOMO06922	CellTypeAll-M4	tan	0.0980143105272768	-0.0166963	0.0593944202601242	0.180895815184156	0.237370581202818	0.119112299543913	0.0390395038189236	0.0819586774208556	-0.0490795	-0.0331281	-0.0732315	-0.0444369	-0.105414
1073	KWMTBOMO06924	CellTypeAll-M11	magenta	0.137671119230065	-0.0522411	0.0841056113164694	-0.0758293	-0.198831	-0.137825	-0.265025	-0.099432	0.384747015095267	0.433711226707155	0.250198830591264	0.534997230927241	0.422493823103352
1074	KWMTBOMO06926	CellTypeAll-M2	turquoise	0.230506103741426	0.145952168036942	0.239001457791515	0.0470516521549837	0.0502402241635095	0.205113507864249	-0.0611692	-0.0707792	0.14897188272335	-0.0024754	0.112957790207208	0.0462489699065406	0.0136393580388245
1075	KWMTBOMO06929	CellTypeAll-M9	pink	0.115100662726927	-0.109251	-0.0403025	0.20207469538495	-0.00171628	-0.14358	-0.140571	0.193266838228461	0.0758886476786827	0.438074165362818	-0.00425029	0.374353426921204	0.238575877054306
1076	KWMTBOMO06974	CellTypeAll-M12	black	0.0283045636613582	0.0389835177175098	0.0643109068827295	-0.325502	-0.37383	-0.193813	-0.113751	-0.286114	0.442337094953746	0.364684806718229	0.404596774876932	0.478641184884094	0.699392512277869
1077	KWMTBOMO06976	CellTypeAll-M2	turquoise	0.206236823972943	0.181240217059928	0.245726231616509	0.0108323193252352	0.0301895585860846	0.220254586371133	-0.0576798	-0.104012	0.144421366314652	-0.051161	0.128316480875349	0.00446153723972352	0.0109087028680034
1078	KWMTBOMO06982	CellTypeAll-M5	brown	0.254674327872002	0.184210641579233	0.263807265061198	0.139947571855223	0.203715250415508	0.359858216722127	-0.00302145	-0.0617886	0.043997011279175	-0.139554	0.0602488414801739	-0.0994087	-0.13928
1079	KWMTBOMO06989	CellTypeAll-M6	yellow	-0.231852	-0.1979	-0.218107	-0.118012	0.216082666027482	-0.134313	0.872019902769185	0.167999736552755	-0.263539	-0.241866	-0.269937	-0.2847	-0.141385
1080	KWMTBOMO06991	CellTypeAll-M6	yellow	-0.224839	-0.207003	-0.237883	-0.0564432	0.190231683854238	-0.168583	0.732403904848669	0.255009096751847	-0.271988	-0.156974	-0.279289	-0.23251	-0.136095
1081	KWMTBOMO06992	CellTypeAll-M6	yellow	-0.189953	-0.162021	-0.156848	-0.126249	0.247984232405566	-0.0477286	0.826049575577847	0.0868209690408591	-0.218444	-0.299766	-0.240076	-0.30806	-0.197769
1082	KWMTBOMO06993	CellTypeAll-M8	blue	0.176807545856889	0.106107272274782	0.263008055187422	-0.118226	-0.0673085	0.193006961907903	-0.105443	-0.267328	0.3279012280392	-0.0440786	0.246317691678114	0.0551553931906753	0.0598771684217394
1083	KWMTBOMO06995	CellTypeAll-M7	green	0.0385759593267859	-0.0450729	-0.0172137	0.0675159377324291	0.0143747086622254	-0.0474828	-0.0202581	0.0972089864994862	0.0064336651295412	0.123021195938231	-0.0335302	0.0997991936180017	0.0447850229220452
1084	KWMTBOMO07015	CellTypeAll-M7	green	-0.00111609	-0.220421	-0.184104	0.354480373200462	0.213822558331108	-0.162935	0.0441664754071534	0.473960164050597	-0.244635	0.263809791026062	-0.329828	0.110627138628646	-0.0803123
1085	KWMTBOMO07019	CellTypeAll-M8	blue	0.23308124381592	0.033801694499476	0.22950936700089	-0.0440621	-0.0643708	0.0792283052098452	-0.136696	-0.155681	0.360390561036352	0.18524872071222	0.223898809565911	0.280498277913573	0.210014294710197
1086	KWMTBOMO07021	CellTypeAll-M2	turquoise	0.17499676362714	0.0991227487245649	0.188710659866564	0.0326510304909064	0.039902536271433	0.146178987916283	-0.0449342	-0.0570548	0.132644808367016	0.00138550965834151	0.0897598518585079	0.0449653320584828	0.0251706176614955
1087	KWMTBOMO07055	CellTypeAll-M5	brown	0.218287310554843	0.201032842454517	0.21920074910135	0.0817042778739925	0.104269559810974	0.282297414844361	-0.0294047	-0.0646636	0.0478337407379476	-0.0938811	0.0899637444072745	-0.0578732	-0.0657087
1088	KWMTBOMO07082	CellTypeAll-M7	green	0.110949292664503	-0.0907367	-0.00948302	0.18366196571008	0.0615748507393787	-0.0679594	-0.00185803	0.192183189329908	0.0311983054452875	0.252855420320354	-0.0439738	0.205719662953193	0.106075687441654
1089	KWMTBOMO07088	CellTypeAll-M2	turquoise	0.286859747928968	0.276796746203271	0.330811217267823	0.020818523300146	-0.0108257	0.304746402179942	-0.144975	-0.142413	0.203238321474184	-0.0235549	0.200239992302144	0.0439309945019898	0.0447158916522013
1090	KWMTBOMO07103	CellTypeAll-M7	green	-0.0200803	-0.229575	-0.2284	0.333739946477952	0.0914461148092586	-0.269068	-0.0486422	0.480997752164615	-0.1799	0.430489569999128	-0.249655	0.264021410999444	0.0781907566277902
1091	KWMTBOMO07107	CellTypeAll-M5	brown	0.191609328942519	0.196040858461231	0.172665627575895	0.18685617439023	0.21524476390754	0.334154679361259	-0.0160053	-0.00484295	-0.0779793	-0.150946	0.0068753656102746	-0.141666	-0.180147
1092	KWMTBOMO07109	CellTypeAll-M7	green	0.132441681002566	-0.205741	-0.0825608	0.592790273205377	0.362742968959847	0.0046393402828165	-0.101472	0.449536732207138	-0.258588	0.158713249413221	-0.33327	0.0322412760536832	-0.190469
1093	KWMTBOMO07114	CellTypeAll-M5	brown	0.259402401544499	0.344231087679397	0.264654660233154	0.0443806450683623	0.0177535251047046	0.352960152615998	-0.105115	-0.152543	0.0782243931354637	-0.0850254	0.209884971037855	-0.0330023	-0.0180504
1094	KWMTBOMO07119	CellTypeAll-M5	brown	0.298785650941787	0.227082861623823	0.337308667589886	0.130060248628914	0.167641860172512	0.385840253666295	-0.0961313	-0.0972622	0.127513002514259	-0.115646	0.109721945299151	-0.0549051	-0.092149
1095	KWMTBOMO07122	CellTypeAll-M2	turquoise	0.210484486989742	0.10646993323504	0.288831438756407	-0.101008	-0.0250868	0.22050750663418	-0.0099849	-0.19514	0.263043700522949	-0.0577358	0.162346700318083	0.0387135987964311	0.00578828242199347
1096	KWMTBOMO07128	CellTypeAll-M5	brown	0.154262122227786	0.297110791158032	0.188741993205012	-0.0447913	-0.0225464	0.270344630230823	-0.0531829	-0.134719	0.0230839644415093	-0.120025	0.16013645262277	-0.0833734	-0.0379068
1097	KWMTBOMO07131	CellTypeAll-M2	turquoise	0.259199664075713	0.332519794357092	0.399397938143204	-0.0692004	0.0444895006036949	0.412803831041062	-0.0435853	-0.240954	0.213988328950014	-0.188118	0.211962862187127	-0.0820566	-0.030963
1098	KWMTBOMO07145	CellTypeAll-M7	green	-0.101075	-0.442855	-0.384176	0.605629971204489	0.346584610227329	-0.326227	0.00496533729484631	0.82416836013224	-0.50518	0.353619375055884	-0.645831	0.0777173204354324	-0.249649
1099	KWMTBOMO07146	CellTypeAll-M7	green	0.098637658823286	-0.139629	-0.0493411	0.401984168105263	0.283098180093708	-0.00666075	-0.0243357	0.329571373632844	-0.165111	0.161877549283117	-0.231973	0.0777818606022855	-0.0994875
1100	KWMTBOMO07175	CellTypeAll-M2	turquoise	0.179126663581425	0.104966756347688	0.193856212946363	0.00447906891105753	0.0102623545955108	0.134054403575486	-0.0542663	-0.0773551	0.161800670921431	0.0126097939797934	0.107586148039725	0.0649161549697289	0.0494657509634847
1101	KWMTBOMO07182	CellTypeAll-M3	red	0.101580397743631	-0.211517	-0.104189	0.517921623392914	0.264364800353298	-0.0684682	-0.0812575	0.430960684555695	-0.209172	0.251697234088362	-0.295484	0.142179650666337	-0.0686729
1102	KWMTBOMO07188	CellTypeAll-M8	blue	0.176276386350197	0.0752773790512389	0.178529090268332	-0.0738937	-0.0959091	0.0479664859645561	-0.11066	-0.117341	0.286323578548645	0.14764643298257	0.195415725602106	0.217339211434431	0.188019423265484
1103	KWMTBOMO07195	CellTypeAll-M8	blue	0.209658454201641	0.0741301343438467	0.194822668443971	-0.0256754	-0.0566182	0.0758548536486067	-0.0948789	-0.0900376	0.263289890227638	0.131587348047153	0.17098589600176	0.193801704829835	0.14825794694165
1104	KWMTBOMO07200	CellTypeAll-M12	black	0.0406177840484694	0.0128410085273705	0.0557544765191246	-0.275724	-0.327249	-0.180961	-0.0733927	-0.224199	0.39573931243148	0.345151752060605	0.34483130030534	0.443844996028434	0.655291461159294
1105	KWMTBOMO07201	CellTypeAll-M5	brown	0.257463740291509	0.226288926898815	0.288751036923901	0.0636356709925097	0.104277606741305	0.327796445800214	-0.0337018	-0.104085	0.114222536524131	-0.108319	0.116927182861948	-0.0489858	-0.0510626
1106	KWMTBOMO07218	CellTypeAll-M6	yellow	0.0767600034603505	0.0265105842951533	0.0555163097627555	0.0873740933254054	0.188361569445652	0.127667294109648	0.155344044360729	0.0335642329450473	-0.0471756	-0.0771265	-0.0436342	-0.075323	-0.0829431
1107	KWMTBOMO07220	CellTypeAll-M5	brown	0.240087510079587	0.217008780081562	0.28148006272138	0.0510164691112908	0.094947791706479	0.311344745761292	-0.0423277	-0.108232	0.123316962207629	-0.0955782	0.120327664276198	-0.0387919	-0.0401269
1108	KWMTBOMO07223	CellTypeAll-M3	red	0.0841717415600322	-0.116206	-0.0538139	0.381328106008325	0.193032495745782	-0.00775211	-0.0680182	0.274814763993565	-0.156975	0.128434904308999	-0.195947	0.0656906673708666	-0.0703397
1109	KWMTBOMO07228	CellTypeAll-M2	turquoise	0.186502330808275	0.154197483076069	0.230325551837021	-0.0581429	-0.0234785	0.174239178043408	-0.0557008	-0.149796	0.190399638611954	-0.0239946	0.157554183422042	0.0453613660393533	0.0566636517192245
1110	KWMTBOMO07243	CellTypeAll-M1	greenyellow	0.274128999476305	0.691181766416386	0.383748007408776	-0.181139	-0.150439	0.468395016579591	-0.15257	-0.336244	0.118753687504878	-0.236267	0.389155536545462	-0.134306	0.0619220774888256
1111	KWMTBOMO07247	CellTypeAll-M9	pink	0.098070493383054	-0.0846813	-0.0208269	0.0776892919046729	-0.0839507	-0.165099	-0.157724	0.103031380503538	0.162772769372165	0.454568163065946	0.0730867699095265	0.422577201190715	0.330329020291296
1112	KWMTBOMO07263	CellTypeAll-M3	red	0.141649584224248	-0.0753703	0.0111306738902483	0.308379787978429	0.142553762370926	-0.00313103	-0.127367	0.201153333965495	-0.0205529	0.228285963978502	-0.0770305	0.184046178561198	0.029326024367139
1113	KWMTBOMO07271	CellTypeAll-M6	yellow	0.0204239550252947	-0.0632201	-0.0273996	0.11498155580061	0.224059688170972	0.0263047259543515	0.25714126916366	0.135528183243966	-0.102745	-0.0466916	-0.129345	-0.0735535	-0.0987649
1114	KWMTBOMO07278	CellTypeAll-M1	greenyellow	0.101198373549795	0.51913627664422	0.140489582247746	-0.155533	-0.144049	0.324186365843379	-0.0859377	-0.230221	-0.0960827	-0.21571	0.24867927384591	-0.185945	-0.0559735
1115	KWMTBOMO07302	CellTypeAll-M8	blue	0.231602772973368	0.0930584788921541	0.230292840897285	0.0342692506729956	0.00554791019149169	0.134039631384735	-0.112323	-0.0928761	0.247694220712389	0.105300135930993	0.166371779051101	0.169107471933366	0.118783223839354
1116	KWMTBOMO07306	CellTypeAll-M6	yellow	-0.0588087	-0.0869895	-0.0766842	-0.123842	-0.0712648	-0.137846	0.180066713974486	0.021606839238361	0.0599945280629158	0.0968695049340467	0.0341996303572221	0.0904633611822595	0.131042084169436
1117	KWMTBOMO07312	CellTypeAll-M5	brown	0.226218022013481	0.243811505964071	0.254490746563862	0.0325988179377139	0.0711790010753741	0.316887194486229	-0.0339392	-0.116721	0.0810167426663208	-0.115852	0.127054647480962	-0.0627477	-0.0538635
1118	KWMTBOMO07327	CellTypeAll-M8	blue	0.255073888859463	0.0759301882890456	0.239721942701302	0.0368317453312812	-0.015841	0.101099684013314	-0.154665	-0.0917106	0.298446272622609	0.174263335256182	0.185354038372906	0.242310368315054	0.159022179816355
1119	KWMTBOMO07328	CellTypeAll-M11	magenta	0.132333389044307	-0.0286098	0.0595772017857344	0.00592457258529726	-0.0883547	-0.0714915	-0.107952	0.0192364564798642	0.191381700656716	0.282613678086182	0.095899515175143	0.334640735071584	0.232607987154872
1120	KWMTBOMO07331	CellTypeAll-M2	turquoise	0.266172185275669	0.112583032084852	0.27744531122749	0.0569947453699765	0.0472562935063658	0.201622411018291	-0.0913104	-0.0891051	0.222914758705465	0.038837024119701	0.143168240351445	0.103324337074279	0.0496293376543619
1121	KWMTBOMO07367	CellTypeAll-M12	black	-0.0576758	-0.0665934	-0.0538039	-0.309033	-0.357131	-0.289438	-0.0319788	-0.172908	0.336794756525902	0.366933952322311	0.290904046468223	0.436165199395451	0.641315103691912
1122	KWMTBOMO07368	CellTypeAll-M9	pink	0.0605164176210567	-0.13033	-0.0549615	0.0331564418068743	-0.128549	-0.235067	-0.151248	0.0931097757839518	0.196161012589795	0.499309870886378	0.0917330991285565	0.462887040681402	0.406886578241063
1123	KWMTBOMO07373	CellTypeAll-M5	brown	0.282680433902686	0.277397570954041	0.324880810893413	0.0561399491057321	0.0968721478972469	0.376050966927949	-0.0726946	-0.139792	0.126873106520118	-0.121691	0.154373322410783	-0.0575982	-0.0510443
1124	KWMTBOMO07374	CellTypeAll-M5	brown	0.232577279219722	0.13325892610507	0.212056358870234	0.123147365037602	0.112360987315176	0.225919948168599	-0.0432435	-0.0327591	0.095549543330033	-0.0138235	0.0839809920528243	0.0256936956705028	-0.00704754
1125	KWMTBOMO07378	CellTypeAll-M6	yellow	-0.0946273	-0.103672	-0.107053	-0.0339109	0.164303371631486	-0.0494909	0.54188615414731	0.107032521701969	-0.144951	-0.129939	-0.14941	-0.15334	-0.0740647
1126	KWMTBOMO07383	CellTypeAll-M2	turquoise	0.29302532514106	0.219490431449142	0.368253434919112	0.0264713596515603	0.0700277141926909	0.335703852612657	-0.0912684	-0.160179	0.219837079753759	-0.0879137	0.169825411209844	-0.00463905	-0.0223881
1127	KWMTBOMO07389	CellTypeAll-M9	pink	0.0846708749522783	-0.0495453	-0.00457074	0.0812132084996834	-0.0379556	-0.092268	-0.110991	0.0872895839238753	0.0931844442842965	0.29877716355757	0.0312622779911069	0.286238823758134	0.205278033489303
1128	KWMTBOMO07400	CellTypeAll-M2	turquoise	0.250702226850475	0.308347553624403	0.319887333050092	-0.0426484	0.00713562768834726	0.327039709587137	-0.0620732	-0.180674	0.165129612959435	-0.112967	0.201129378902926	-0.036476	0.0122450794408531
1129	KWMTBOMO07409	CellTypeAll-M6	yellow	-0.152528	-0.159928	-0.188546	-0.00611411	0.0637870136791879	-0.168516	0.377806270648824	0.245018552483907	-0.189921	-0.0088369	-0.207838	-0.0912234	-0.0657787
1130	KWMTBOMO07414	CellTypeAll-M8	blue	0.108108174971116	0.0514006418308607	0.127391082179885	-0.10502	-0.103376	0.0232683130488862	-0.0773286	-0.136903	0.240713329243974	0.0940432592732073	0.175803182597838	0.161303380273641	0.160905425564601
1131	KWMTBOMO07415	CellTypeAll-M9	pink	0.0516707444949318	-0.0657578	-0.0513951	0.0462328027199037	-0.0801339	-0.150377	-0.0709363	0.130453584604423	0.0677569108605302	0.339661908067754	0.0175803351424552	0.289337380937766	0.230643529659349
1132	KWMTBOMO07417	CellTypeAll-M2	turquoise	0.215952441016898	0.169711914927557	0.266075468251189	-0.0175274	0.00465744248232645	0.202295861611984	-0.0643664	-0.124791	0.204883721772347	-0.0160532	0.161415044716643	0.0478696920747372	0.0528765074521825
1133	KWMTBOMO07428	CellTypeAll-M3	red	0.137520848946713	-0.229934	-0.0758821	0.610976707975434	0.412837701461891	-0.00651173	-0.0943858	0.483426916898587	-0.269487	0.190142914452069	-0.37141	0.0522031022926901	-0.204507
1134	KWMTBOMO07436	CellTypeAll-M7	green	-0.31066	-0.544009	-0.534288	0.401249723120186	0.358891431597908	-0.440326	0.408422851168165	0.854470984954346	-0.644177	0.145233104133557	-0.772504	-0.147551	-0.359287
1135	KWMTBOMO07445	CellTypeAll-M2	turquoise	0.234581553263063	0.265371514960932	0.351048211808212	-0.129588	-0.0691305	0.321127264073475	-0.0923617	-0.262979	0.25700639877753	-0.117887	0.238557187339517	-0.01286	0.00479731030904356
1136	KWMTBOMO07453	CellTypeAll-M4	tan	0.1450486983572	-0.0371344	0.0825010005017576	0.239913075514717	0.329913698784367	0.139929925401081	0.153715320664278	0.158931796576786	-0.0640352	-0.00909714	-0.130105	-0.0292865	-0.105416
1137	KWMTBOMO07485	CellTypeAll-M9	pink	0.118663102060992	-0.119842	0.0179038161294023	0.0489125691210927	-0.154965	-0.201362	-0.274215	0.0450690771930917	0.29596211635637	0.528332911052991	0.148533605237872	0.522731318720714	0.440061460162212
1138	KWMTBOMO07486	CellTypeAll-M6	yellow	0.0499334756878469	-0.0110831	0.026963783333818	0.0846264855207193	0.140907826642786	0.0553048148997661	0.123543581005471	0.0610530935508614	-0.0357719	-0.0253209	-0.050497	-0.0329346	-0.0542947
1139	KWMTBOMO07488	CellTypeAll-M2	turquoise	0.298600082077168	0.272619926738968	0.387456206993543	-0.113562	-0.0682435	0.301046462599535	-0.103638	-0.269339	0.330534744570675	-0.04766	0.293389649015645	0.0736900689755142	0.102212590827138
1140	KWMTBOMO07516	CellTypeAll-M5	brown	0.311533180358986	0.187697290050759	0.296341361383914	0.150537066454088	0.217392738471087	0.363730776184277	0.0507825655576947	-0.0368596	0.067587486061455	-0.127965	0.0609491519608717	-0.0814433	-0.121386
1141	KWMTBOMO07547	CellTypeAll-M6	yellow	0.0662912938359964	-0.013936	0.0186782588033918	0.038208536020949	0.0214568586492978	-0.0142956	0.0618384923348641	0.0473435781044823	0.0345973493803045	0.0943314306746946	0.0061101150531974	0.0991708697875503	0.0798243410741448
1142	KWMTBOMO07555	CellTypeAll-M2	turquoise	0.238244740127309	0.181230824658357	0.301223712005125	-0.0235575	0.00290320053532058	0.238504685377161	-0.078224	-0.152408	0.223930745591204	-0.0429912	0.168046999809287	0.038345848083468	0.0363908183644406
1143	KWMTBOMO07562	CellTypeAll-M5	brown	0.209984333449725	0.265089547274844	0.229193386037292	0.0666845738608086	0.0993965451118675	0.299692799321211	-0.0497468	-0.0772526	0.0339101087214776	-0.105695	0.113141451501195	-0.0696513	-0.0473974
1144	KWMTBOMO07563	CellTypeAll-M8	blue	0.415968951465103	0.203481590949665	0.478264256199966	-0.100629	-0.105292	0.275844694766008	-0.228805	-0.265525	0.511841633734207	0.0650604938389409	0.324368117041185	0.219237354747721	0.185420702480048
1145	KWMTBOMO07573	CellTypeAll-M2	turquoise	0.220251730933864	0.137796703728198	0.228884044243198	-0.0142461	-0.0244882	0.137752223325057	-0.0742169	-0.0868367	0.20558721016145	0.0572437652196663	0.152278343087663	0.11463381477459	0.100155141526974
1146	KWMTBOMO07586	CellTypeAll-M8	blue	0.205331584945108	0.139031112816403	0.2279589802084	-0.0540505	-0.0526149	0.130123651184034	-0.0902869	-0.126779	0.248212399949918	0.0480534180029389	0.179952801506915	0.123138160812996	0.119724880126755
1147	KWMTBOMO07589	CellTypeAll-M10	purple	0.291121649684711	0.198463274015684	0.289235703829582	0.019165733447669	-0.0207121	0.192506643475843	-0.1159	-0.144593	0.287230955309209	0.0915014647090528	0.28389192137636	0.175412374328764	0.183361696764294
1148	KWMTBOMO07592	CellTypeAll-M8	blue	0.161617925196552	0.0535585451143169	0.146131087906301	-0.0642617	-0.0905954	0.0261877554362658	-0.101116	-0.119659	0.264256998892727	0.161063456242599	0.198849632030553	0.225865453842661	0.205633967331084
1149	KWMTBOMO07597	CellTypeAll-M2	turquoise	0.254267908964663	0.136893884307998	0.264361172096524	0.0718066800293492	0.0728805228084939	0.21744110198194	-0.0838953	-0.068523	0.163136903251524	-0.0104381	0.114911254994786	0.0428446902310859	0.00896156955046648
1150	KWMTBOMO07600	CellTypeAll-M10	purple	0.150472097105911	0.272847830237961	0.187641983354415	-0.266712	-0.253562	0.0391595994178758	-0.008534	-0.302134	0.348815663434857	0.15511425273866	0.457112314859133	0.289240154325171	0.513784095890121
1151	KWMTBOMO07604	CellTypeAll-M7	green	0.0637454762933838	-0.200485	-0.125345	0.401769059826407	0.228201583376925	-0.120789	-0.0230254	0.449662086904437	-0.188139	0.262080588174405	-0.290099	0.124781652963035	-0.0781456
1152	KWMTBOMO07606	CellTypeAll-M7	green	-0.0601756	-0.136506	-0.139221	0.0674670305764659	-0.0138293	-0.170793	-0.017983	0.289310677243174	-0.107921	0.140445775265124	-0.183097	0.0167968463657752	-0.0729806
1153	KWMTBOMO07617	CellTypeAll-M9	pink	0.1208254206397	-0.0833293	-0.00690435	0.177476529455946	-0.00411636	-0.114626	-0.146685	0.152358276213047	0.113467462435423	0.392750710095086	0.0336249450168855	0.336160001176683	0.211467426396884
1154	KWMTBOMO07619	CellTypeAll-M7	green	0.0390394837195307	-0.23197	-0.189896	0.488574847214298	0.27524218614188	-0.162226	0.0441205579683246	0.52383795696296	-0.265392	0.346290733575142	-0.343723	0.182987003868446	-0.0392164
1155	KWMTBOMO07620	CellTypeAll-M8	blue	0.163158355386266	0.100869254888603	0.197742105966425	-0.0665854	-0.0547136	0.115506905033773	-0.0906521	-0.164517	0.253009708799435	0.0496537558026808	0.19516668225518	0.126451506880802	0.120314169211082
1156	KWMTBOMO07621	CellTypeAll-M10	purple	0.329261642584519	0.434715867461359	0.474723507599823	-0.304552	-0.26342	0.354014980294417	-0.226979	-0.511677	0.509835148558426	-0.0483968	0.586658969669725	0.139956279854024	0.25772133299168
1157	KWMTBOMO07631	CellTypeAll-M6	yellow	-0.00622507	-0.0326723	0.0140076271940931	-0.00187567	0.170486836546184	0.0842248866145191	0.323217148579746	0.0138198364440825	-0.0379131	-0.142336	-0.0666035	-0.131421	-0.0985602
1158	KWMTBOMO07632	CellTypeAll-M6	yellow	-0.0362739	-0.0663178	-0.0228032	-0.011683	0.200961740802595	0.0479695923123478	0.478494826845701	0.0486603032957306	-0.0681559	-0.165293	-0.0963049	-0.163221	-0.104988
1159	KWMTBOMO07635	CellTypeAll-M6	yellow	-0.106749	-0.165163	-0.171716	0.0716130062491438	0.217535519357566	-0.10444	0.499349188169931	0.276128104715604	-0.221124	-0.0522516	-0.2435	-0.12864	-0.112857
1160	KWMTBOMO07638	CellTypeAll-M6	yellow	-0.015905	-0.152828	-0.0825333	0.224178553464892	0.441208873185456	0.0731485569157989	0.459957145384692	0.212429700947311	-0.241051	-0.156802	-0.275374	-0.207135	-0.248933
1161	KWMTBOMO07639	CellTypeAll-M6	yellow	-0.263648	-0.218257	-0.245104	-0.106471	0.267128758633964	-0.140167	0.910795289446372	0.201422286368725	-0.306002	-0.27631	-0.304438	-0.325724	-0.179939
1162	KWMTBOMO07642	CellTypeAll-M5	brown	0.138192769650557	0.226724399618061	0.180709547999769	-0.0404986	-0.000622051	0.22799246623107	-0.0280299	-0.123095	0.0652306497940279	-0.10267	0.132613276843561	-0.0568408	-0.0122958
1163	KWMTBOMO07650	CellTypeAll-M2	turquoise	0.179110025745856	0.13331077541594	0.204055275640634	-0.00793148	-0.00392374	0.159017436818701	-0.0614949	-0.0916697	0.154951214490521	9.09370738296825e-05	0.12637661117826	0.0516592130359278	0.0421854744096525
1164	KWMTBOMO07652	CellTypeAll-M5	brown	0.247271531538913	0.188812775217657	0.271601710931557	0.0630031170466532	0.100181211498473	0.291434841796747	-0.0230973	-0.0902584	0.127431049259723	-0.0732766	0.113640797753038	-0.0169748	-0.0308026
1165	KWMTBOMO07658	CellTypeAll-M1	greenyellow	0.210226749625085	0.363017540259472	0.207182262729285	0.0330422328811881	0.0706035712630369	0.348713253963093	-0.0132981	-0.114571	-0.0405414	-0.174599	0.137205672659119	-0.143589	-0.115543
1166	KWMTBOMO07661	CellTypeAll-M6	yellow	0.000700262294349591	-0.032438	-0.00681147	-0.0566502	0.124392626094921	0.0268410228857212	0.364376566742217	0.00405982630419416	-0.0290113	-0.119161	-0.0452703	-0.100586	-0.0599124
1167	KWMTBOMO07670	CellTypeAll-M7	green	0.0352980122230428	-0.216162	-0.188599	0.382986509187114	0.194926686301939	-0.1709	0.0580642107377142	0.515765888484676	-0.249359	0.303198207262598	-0.306457	0.140263570441319	-0.0273325
1168	KWMTBOMO07675	CellTypeAll-M8	blue	0.235588010256628	0.134965995506721	0.270561507813911	-0.176096	-0.182223	0.0749324398893141	-0.16099	-0.240622	0.440966633400327	0.160296649947422	0.32334253278128	0.281457139924027	0.290182096682295
1169	KWMTBOMO07685	CellTypeAll-M8	blue	0.0470886727867762	-0.0124367	0.0254881312168607	-0.053301	-0.0888945	-0.0576493	-0.0645256	-0.0622419	0.157762393190297	0.175963196222594	0.121568310177718	0.211514544057055	0.192452481388312
1170	KWMTBOMO07688	CellTypeAll-M12	black	0.0307610682997325	0.0221764958664036	0.102465051010959	-0.389562	-0.426345	-0.187317	-0.157813	-0.376936	0.54126951382788	0.351646524034621	0.460618130461553	0.496974369095435	0.738152193516327
1171	KWMTBOMO07689	CellTypeAll-M12	black	0.0841614822730283	0.00849920412093335	0.0481659822798304	-0.0819654	-0.149893	-0.0799694	-0.112039	-0.0939546	0.234052526803659	0.264119021379353	0.200181290543379	0.318151740134579	0.321273647823447
1172	KWMTBOMO07707	CellTypeAll-M1	greenyellow	0.329113181807565	0.383218709540359	0.352941644943395	-0.000653895	0.0506756188446692	0.364469390587114	-0.00814117	-0.157163	0.143340149238976	-0.142716	0.211911320065812	-0.0594916	-0.00251858
1173	KWMTBOMO07709	CellTypeAll-M5	brown	0.250174473115009	0.451410216638246	0.350658227691994	-0.0102054	0.0740688776798816	0.512371038552263	-0.061003	-0.229568	0.0642340008775421	-0.284236	0.21348474586417	-0.202008	-0.125912
1174	KWMTBOMO07715	CellTypeAll-M10	purple	0.195403891882331	0.228902827827946	0.264580961255272	-0.137545	-0.117244	0.163885167490392	-0.105069	-0.228597	0.275856601178625	-0.013652	0.326331852192456	0.0835488463024876	0.155106671288259
1175	KWMTBOMO07722	CellTypeAll-M2	turquoise	0.16945544939306	0.212722276127984	0.218853305222394	-0.021482	0.0144646405767936	0.229220389986988	-0.0284027	-0.11535	0.105263634340536	-0.0778509	0.13441952243639	-0.0266816	0.00696911294682681
1176	KWMTBOMO07724	CellTypeAll-M8	blue	0.272314371888749	0.1446034447587	0.316200262835585	-0.0405217	-0.0238245	0.200753520866433	-0.110604	-0.166357	0.313678929727014	0.0279644108295381	0.217028022810791	0.119371156762414	0.0966421632678995
1177	KWMTBOMO07727	CellTypeAll-M12	black	0.0442189403066928	-0.0119123	0.0186909813905053	-0.0483702	-0.0821213	-0.0583129	-0.0605679	-0.0414133	0.139123417839064	0.16086993430505	0.104123576107724	0.187566581596057	0.175557775482132
1178	KWMTBOMO07742	CellTypeAll-M6	yellow	0.0490002097990824	-0.0485712	0.000951588751762884	0.0639923278396481	0.125580108500391	0.0188329917716763	0.111262900039996	0.0349292003738341	-0.00178302	0.00902580790141221	-0.0379965	0.00954669016559775	-0.0259853
1179	KWMTBOMO07771	CellTypeAll-M11	magenta	0.167344976060096	-0.0203925	0.0592240774616353	0.0905507750813914	-0.0430834	-0.0648313	-0.10731	0.0715875306117527	0.178515923072019	0.351877038828009	0.105753417449956	0.375663271087711	0.266619981117484
1180	KWMTBOMO07772	CellTypeAll-M12	black	0.0188384189395034	-0.00969894	0.0287804499684373	-0.241991	-0.307649	-0.205314	-0.0963111	-0.200623	0.373060728791533	0.366895577588329	0.325097103745288	0.451945558342209	0.650887796223655
1181	KWMTBOMO07780	CellTypeAll-M2	turquoise	0.198075602970247	0.118176644405571	0.206577584024351	-0.00408322	-0.0223403	0.123605809669904	-0.079866	-0.0884373	0.202609703709378	0.067569206798723	0.150672314505105	0.125787624118158	0.104963535782318
1182	KWMTBOMO07783	CellTypeAll-M2	turquoise	0.313822358920163	0.332483703634617	0.355619989269108	-0.0612444	-0.0153322	0.305170860567415	0.010015488412955	-0.172411	0.216427177709664	-0.0627126	0.251671629459664	0.0258982919810349	0.0995342465616929
1183	KWMTBOMO07784	CellTypeAll-M2	turquoise	0.342509384862698	0.438939003855589	0.437167399443944	-0.0921953	-0.0389124	0.404641145743469	-0.0825908	-0.266404	0.259579353223583	-0.129493	0.314872149970336	-0.0133833	0.0845962653434619
1184	KWMTBOMO07789	CellTypeAll-M9	pink	0.037377549645134	-0.142969	-0.11452	0.168564177880814	0.000687888597428459	-0.186182	-0.0503254	0.284404113805901	-0.039103	0.394351414895632	-0.118703	0.290892537386019	0.170430445391426
1185	KWMTBOMO07803	CellTypeAll-M7	green	0.100210881954869	-0.171618	-0.0910581	0.447414411368454	0.264537410508764	-0.0439035	-0.0620776	0.41825215032204	-0.212554	0.210230814301303	-0.287964	0.083461721407728	-0.123371
1186	KWMTBOMO07814	CellTypeAll-M12	black	0.0979709212543852	-0.00462174	0.015968670164999	0.00684616344860685	-0.0683346	-0.0862659	-0.0031529	0.0686553445638621	0.111011840129938	0.274048908930325	0.0658956317361473	0.28274495946531	0.277690431982509
1187	KWMTBOMO07815	CellTypeAll-M8	blue	0.144576946984706	0.0210098164508526	0.108560104960549	-0.0438027	-0.106267	-0.0292153	-0.120631	-0.0584107	0.254496607869612	0.22707802068229	0.161805383233131	0.273522821210983	0.223811165694899
1188	KWMTBOMO07816	CellTypeAll-M2	turquoise	0.224695750398765	0.149310415367867	0.291385370263818	-0.0586597	-0.0253108	0.215964369314619	-0.0737238	-0.192814	0.266533642811526	-0.0265976	0.201888103684145	0.0611230103204428	0.0539874238804737
1189	KWMTBOMO07821	CellTypeAll-M7	green	0.142650101683527	-0.149375	-0.0432877	0.332700242762329	0.111035205139467	-0.110274	-0.131512	0.346970150160029	-0.0201645	0.380141592111518	-0.139499	0.295812886290564	0.0931606829473944
1190	KWMTBOMO07825	CellTypeAll-M2	turquoise	0.266202666236553	0.130121383230471	0.265798159415865	0.0654828045292958	0.0542047808434918	0.18704425028327	-0.0846057	-0.0682796	0.201964312744376	0.0420785068049226	0.133812738902989	0.103266168591515	0.0558267163217766
1191	KWMTBOMO07831	CellTypeAll-M3	red	0.151701209013231	-0.0650638	0.0787382721366027	0.361835595039139	0.33808968685592	0.163058425498833	-0.0183015	0.167854632497456	-0.0819815	-0.0122971	-0.153635	-0.0478092	-0.176558
1192	KWMTBOMO07840	CellTypeAll-M9	pink	0.0474878485501688	-0.11177	-0.0497673	0.0480508100254109	-0.0838965	-0.167574	-0.140816	0.0860999207658926	0.135372804578268	0.385275146452475	0.0476970673360358	0.346868	0.235335954222862
1193	KWMTBOMO07855	CellTypeAll-M11	magenta	0.191085828550371	0.0273289677877368	0.154938380648767	0.0308550952410829	-0.0490868	0.0253869623532312	-0.165716	-0.0827823	0.286058152810459	0.254718994550895	0.196859249672383	0.334139478192658	0.229713363744685
1194	KWMTBOMO07860	CellTypeAll-M2	turquoise	0.294456055616537	0.125044193699451	0.316331832878837	0.0487786768470553	0.0601693329443397	0.228588452578621	-0.0865059	-0.0932177	0.238230411157804	0.0101096786360908	0.138263612293014	0.0785768058514348	0.0241011679472615
1195	KWMTBOMO07869	CellTypeAll-M9	pink	0.0466672464116604	-0.0837206	-0.0369381	0.0458189910939606	-0.0625335	-0.125829	-0.0907357	0.0781993209164244	0.0962840590980414	0.30295901897672	0.0347737526556848	0.273841547110953	0.199681437334955
1196	KWMTBOMO07870	CellTypeAll-M2	turquoise	0.21481633433908	0.166124792026044	0.245935992996559	0.0229416100407391	0.0449021549517948	0.211032959270939	-0.0509634	-0.0991645	0.157888185771231	-0.0301903	0.131393848735816	0.0275092612531678	0.0258353528505135
1197	KWMTBOMO07871	CellTypeAll-M2	turquoise	0.322988710838998	0.188890794892049	0.349055298430222	0.0481271651307105	0.0789546378247358	0.291379698149364	-0.0603578	-0.120037	0.232365970674417	-0.0294629	0.167517950780342	0.0493687144347363	0.0154792262944888
1198	KWMTBOMO07872	CellTypeAll-M2	turquoise	0.20812434403416	0.156874397965606	0.247729976941314	-0.00873125	0.0199973878594765	0.191882535541984	-0.0450552	-0.109993	0.176172034710258	-0.0270185	0.142963204082368	0.0335998961550064	0.0352751332963772
1199	KWMTBOMO07874	CellTypeAll-M10	purple	0.254568310527718	0.17929586192106	0.262090686729915	-0.0787706	-0.0991313	0.111684754332965	-0.074429	-0.167789	0.348451421057104	0.159580614269039	0.327480045998272	0.252464181172664	0.286854010541219
1200	KWMTBOMO07879	CellTypeAll-M3	red	0.282526055934061	6.58422573441821e-05	0.165753051327518	0.381726192094049	0.293940719410635	0.19315040480941	-0.0788621	0.187348716780849	-0.0120341	0.0599650208145558	-0.0949019	0.0338599594145744	-0.11392
1201	KWMTBOMO07884	CellTypeAll-M2	turquoise	0.27691429894734	0.201531155449518	0.326385032497438	0.00216403292993272	0.0225366837664266	0.25267022690503	-0.0769418	-0.131113	0.222434868633688	-0.0348836	0.174023348011653	0.0436189198562983	0.0467781463395286
1202	KWMTBOMO07887	CellTypeAll-M8	blue	0.195583136885439	0.0884572518604335	0.186177983410733	-0.016012	-0.040129	0.0879733017541285	-0.0852092	-0.0872595	0.221237920083255	0.0926275638869528	0.153506697900753	0.15075818155009	0.125644874816587
1203	KWMTBOMO07888	CellTypeAll-M12	black	-0.026453	-0.013879	-0.0251921	-0.300011	-0.278547	-0.230727	0.135002779032736	-0.174265	0.292948746812111	0.304623799062774	0.286669157737961	0.385800472687315	0.636166743542566
1204	KWMTBOMO07896	CellTypeAll-M2	turquoise	0.180997075258919	0.153851245886242	0.218255821176322	0.0284850462627981	0.0394081859545426	0.204896510002786	-0.0657707	-0.0865357	0.121506967076712	-0.0434734	0.105410120360123	0.00302425552028011	-0.00149734
1205	KWMTBOMO07903	CellTypeAll-M3	red	0.0341598670121549	-0.221621	-0.132853	0.488341631201655	0.385129100753694	-0.00176944	0.194766261960131	0.379706793594714	-0.298219	-0.000282417	-0.331554	-0.0920489	-0.192323
1206	KWMTBOMO07904	CellTypeAll-M4	tan	0.128985087880657	-0.0437434	0.0375914284352046	0.360336438249644	0.438887321221416	0.171670742373064	0.0818142280861348	0.200591686882051	-0.169865	-0.0463761	-0.188276	-0.100857	-0.220899
1207	KWMTBOMO07905	CellTypeAll-M7	green	0.175459196307389	-0.160355	-0.0207663	0.593947492883086	0.43392290003379	0.0774809924526222	-0.100397	0.415559811601942	-0.230318	0.15484757734116	-0.309069	0.041594115772188	-0.215261
1208	KWMTBOMO07912	CellTypeAll-M2	turquoise	0.366670180236542	0.191427884964456	0.38494601686556	0.0391989181163663	0.0428401246269589	0.27482729438463	-0.107634	-0.147958	0.299874994856876	0.00764695044384	0.203600665378297	0.111182053167365	0.0790586901406623
1209	KWMTBOMO07913	CellTypeAll-M4	tan	0.15722629525284	0.0323759511831655	0.130088427251889	0.15793752312136	0.24536277913861	0.179423806825675	0.0785863918078651	0.0540127705815786	-0.00589156	-0.0568669	-0.0419916	-0.0487907	-0.100529
1210	KWMTBOMO07919	CellTypeAll-M5	brown	0.142187663994598	0.341662613694576	0.202340816715826	-0.0714362	0.0553453651224108	0.346615180704395	0.0864708995393193	-0.16274	-0.00324666	-0.223308	0.155662351765614	-0.177446	-0.101654
1211	KWMTBOMO07933	CellTypeAll-M7	green	0.0206965869210784	-0.0993643	-0.0698429	0.181985883420628	0.157398072796159	-0.0384984	0.115882541508714	0.21260283439377	-0.122847	0.0771995734152218	-0.157331	0.0159697071136678	-0.062657
1212	KWMTBOMO07945	CellTypeAll-M3	red	0.134771119273776	-0.0638295	0.041661864532881	0.303083213794838	0.217431061729601	0.0758266960841346	-0.0252686	0.152698439998814	-0.0513314	0.0521726479414596	-0.11008	0.0203642081683837	-0.0845353
1213	KWMTBOMO07946	CellTypeAll-M7	green	-0.0405144	-0.294252	-0.255681	0.428770814877008	0.189563338904872	-0.231726	-0.12206	0.577624622793595	-0.327138	0.311474469607169	-0.433302	0.107996131551492	-0.153615
1214	KWMTBOMO07948	CellTypeAll-M5	brown	0.187888319317824	0.199586024830503	0.207105053272005	0.0649195252010129	0.0853497953479969	0.257994605885104	-0.0485349	-0.0703864	0.0533404525542659	-0.0879597	0.0920719215147214	-0.0523698	-0.0429853
1215	KWMTBOMO07952	CellTypeAll-M2	turquoise	0.179811643664406	0.105107603094963	0.188291017615656	-0.0107745	-0.00128458	0.1099572770573	-0.0104987	-0.0804888	0.189478569983952	0.0598342175263439	0.137687989270264	0.1185270794264	0.111002526166262
1216	KWMTBOMO07971	CellTypeAll-M3	red	0.131084774443981	-0.128267	-0.0200676	0.477755474639608	0.326801415312406	0.0565936531255045	-0.0533292	0.299141338159525	-0.176342	0.0976625211428636	-0.225443	0.0206523479725002	-0.147989
1217	KWMTBOMO07989	CellTypeAll-M2	turquoise	0.192589119149549	0.144433289523095	0.210949079968727	-0.0195792	-0.0224083	0.15585032202138	-0.0721667	-0.112974	0.175379585083557	0.0260475647350273	0.155959987232986	0.0830537660011062	0.0750703291577758
1218	KWMTBOMO08000	CellTypeAll-M2	turquoise	0.188475998185434	0.161914565123041	0.239791039213139	-0.0159876	0.0199534555026613	0.219064213507552	-0.0456066	-0.121902	0.14619999235985	-0.0639725	0.125345210185843	-0.00612311	-0.00626747
1219	KWMTBOMO08009	CellTypeAll-M3	red	0.098629664924874	-0.176852	-0.087386	0.453938116160511	0.220344737374165	-0.0604685	-0.036857	0.385183165840761	-0.183224	0.218309898467657	-0.252593	0.113919730913756	-0.0596599
1220	KWMTBOMO08011	CellTypeAll-M12	black	0.140864332577482	0.014919885749095	0.0676098845509258	-0.0042394	-0.126878	-0.0934931	-0.101806	-0.0493902	0.263091038507531	0.333824823287766	0.230352426013243	0.374059442896879	0.391339599722805
1221	KWMTBOMO08013	CellTypeAll-M6	yellow	-0.0932913	-0.182131	-0.148874	0.0755093639104156	0.307458844380865	-0.0534782	0.623288809070898	0.210316326226649	-0.224613	-0.126345	-0.27446	-0.175476	-0.174183
1222	KWMTBOMO08021	CellTypeAll-M2	turquoise	0.171430108627004	0.182265277861555	0.241740903683901	-0.0281792	0.0332245270842592	0.234658218782723	-0.0215424	-0.127411	0.140153223755178	-0.0845132	0.126355404047452	-0.0224924	-0.000133051
1223	KWMTBOMO08024	CellTypeAll-M8	blue	0.225662992817327	0.129200007403828	0.244147396391174	-0.0618244	-0.0713415	0.122543184366353	-0.108813	-0.145505	0.296878991973983	0.0924880729239028	0.21093944603504	0.175472276235294	0.159495783014629
1224	KWMTBOMO08026	CellTypeAll-M3	red	0.232188602244461	0.0419110577354697	0.125658110663161	0.339062836919549	0.19844101131659	0.169617013720097	-0.0679982	0.141388157759388	-0.0288121	0.0598234492535568	-0.0438611	0.0359689495497934	-0.0543047
1225	KWMTBOMO08031	CellTypeAll-M2	turquoise	0.231448716593156	0.177823388543589	0.328998562016251	-0.0669971	0.0220018266662221	0.313679546703406	-0.0302164	-0.217459	0.231585553533414	-0.114208	0.176890117512177	-0.0198476	-0.0404363
1226	KWMTBOMO08033	CellTypeAll-M2	turquoise	0.172388364354709	0.117476588105757	0.185183557241433	0.045829567476589	0.0556656352543364	0.172655506577975	-0.0331296	-0.056589	0.100262264154328	-0.0227541	0.0829673910624516	0.0153878556775339	-0.00643944
1227	KWMTBOMO08040	CellTypeAll-M8	blue	0.134309450743018	0.0601366311782565	0.139231850998256	-0.0927632	-0.115453	0.0154224532966928	-0.129926	-0.156986	0.296680610317095	0.171836601614784	0.234445621934998	0.249631478053484	0.235632828712149
1228	KWMTBOMO08041	CellTypeAll-M1	greenyellow	0.202518600452217	0.387725298962239	0.230298733639839	-0.0386062	-0.0591724	0.268631969116921	-0.110804	-0.155797	0.0753448869410604	-0.074228	0.230485539359931	-0.0214586	0.0563867060598576
1229	KWMTBOMO08046	CellTypeAll-M8	blue	0.170567307684923	0.063229901789171	0.155217533232913	-0.0338096	-0.044929	0.0533220580614831	-0.0136449	-0.0673669	0.229079365026022	0.13008436347975	0.161535013295812	0.180439647407064	0.170287333784377
1230	KWMTBOMO08051	CellTypeAll-M6	yellow	-0.10042	-0.122943	-0.1299	-0.0129715	0.107352412186101	-0.0969449	0.442963754567381	0.165086963254551	-0.148907	-0.0547378	-0.163487	-0.102907	-0.0430931
1231	KWMTBOMO08059	CellTypeAll-M1	greenyellow	0.156013397662202	0.328796435797534	0.20895419162493	-0.0536196	-0.0248733	0.257112156334826	-0.0502191	-0.143183	0.0683765066983186	-0.112555	0.168497239379656	-0.064811	0.0157226964133988
1232	KWMTBOMO08064	CellTypeAll-M12	black	0.0745685196401878	0.0693279189122149	0.0785202361749817	-0.25639	-0.314995	-0.143006	-0.110142	-0.21193	0.384680619964164	0.341771908875648	0.362144566481475	0.433801456339946	0.60526086779491
1233	KWMTBOMO08100	CellTypeAll-M12	black	0.047081027289336	-0.0110913	0.0507510990911555	-0.223921	-0.279609	-0.174047	-0.0794322	-0.196911	0.385203581450868	0.366913252419948	0.324308321793868	0.455874907032876	0.628132291518235
1234	KWMTBOMO08101	CellTypeAll-M2	turquoise	0.203648318619862	0.117643275322952	0.21552896954935	0.0193431201352976	0.0223294389640971	0.159558429234998	-0.0544157	-0.0745405	0.156140554658087	-0.0013695	0.111944898384939	0.0473095160987958	0.0321565635913055
1235	KWMTBOMO08117	CellTypeAll-M2	turquoise	0.192397890744812	0.140212600859638	0.232310919996365	-0.00195198	0.0207002955028941	0.198694800109997	-0.0616216	-0.117014	0.170062166861541	-0.0302209	0.134422263294805	0.0244655250815704	0.0153678264479137
1236	KWMTBOMO08129	CellTypeAll-M2	turquoise	0.180112785832255	0.263710309512953	0.240916101750469	-0.0748079	-0.0187085	0.236483402777142	-0.0138654	-0.145938	0.124795195618507	-0.0926711	0.187221571339147	-0.030255	0.0346389111604023
1237	KWMTBOMO08133	CellTypeAll-M2	turquoise	0.36664366888319	0.366975420767589	0.45630181833001	-0.0318128	0.0113854550284371	0.404538758313651	-0.122464	-0.240696	0.290272738727946	-0.104614	0.283376158470801	0.0116478600178564	0.0577741008388146
1238	KWMTBOMO08136	CellTypeAll-M2	turquoise	0.219833469525659	0.159465164453887	0.281272311179769	-0.0525787	-0.0253458	0.196871742580006	-0.0786665	-0.16533	0.254889780258282	-0.0311464	0.191688422223016	0.0486026364765718	0.0649037378495863
1239	KWMTBOMO08144	CellTypeAll-M5	brown	0.198075679379536	0.258888167460559	0.211782346650393	0.0663822748431491	0.178580085747128	0.339193874571119	0.108258293358497	-0.0566785	-0.0229918	-0.182147	0.066297897351509	-0.149995	-0.115368
1240	KWMTBOMO08145	CellTypeAll-M5	brown	0.235838294788809	0.266761409468373	0.262875924623649	0.0372813642912367	0.0813336996341359	0.31514005407053	-0.0290131	-0.115241	0.0933420901452086	-0.110577	0.140236486539602	-0.0558954	-0.0275419
1241	KWMTBOMO08187	CellTypeAll-M3	red	0.129711405877326	-0.123391	-0.016769	0.440648940100397	0.292455695822098	0.0496330080078152	-0.0411926	0.279103800751237	-0.156067	0.0961078452004148	-0.201821	0.0247101948460355	-0.127028
1242	KWMTBOMO08194	CellTypeAll-M2	turquoise	0.211927362822496	0.164830264069069	0.272971329492733	-0.0534829	-0.0283808	0.192333925789359	-0.076248	-0.15784	0.236928647597362	-0.0145681	0.177907951231172	0.0657729476635518	0.071598281945592
1243	KWMTBOMO08196	CellTypeAll-M5	brown	0.237571809867984	0.233966820881054	0.292003503305424	-0.0115335	0.082375938177469	0.332482256785836	0.00259481215319873	-0.158538	0.140708959031738	-0.134162	0.144252078153264	-0.0610524	-0.0450937
1244	KWMTBOMO08197	CellTypeAll-M8	blue	0.208651947687236	0.0830725453779072	0.193291040429979	-0.0180412	-0.0543003	0.0778863767401266	-0.089276	-0.0769223	0.245093667358545	0.128952059461495	0.162719512734234	0.187916755591353	0.156935952494969
1245	KWMTBOMO08204	CellTypeAll-M2	turquoise	0.265388900910982	0.325500448446819	0.31972851882652	-0.0338408	0.000888394777792975	0.313887132129348	-0.0588263	-0.170185	0.160088282209283	-0.101369	0.2221823842726	-0.0267617	0.0358124295624071
1246	KWMTBOMO08205	CellTypeAll-M2	turquoise	0.274120754904838	0.242325172457814	0.321703485632614	-0.0660486	-0.0494228	0.22289256553019	-0.0874251	-0.177919	0.271019590137552	-0.00932887	0.237307416463185	0.0860428602724711	0.123684355163251
1247	KWMTBOMO08227	CellTypeAll-M6	yellow	0.13537113194942	0.0369477845238558	0.0671985920831619	0.00300311150428318	-0.00237922	-0.0132588	0.156175533693173	0.0518086885857632	0.0874830169118327	0.149330148461375	0.0601884407475093	0.17649514995024	0.209124190530694
1248	KWMTBOMO08253	CellTypeAll-M2	turquoise	0.176855679508232	0.145099984040004	0.233778495185798	-0.0509289	0.00212409092227934	0.204350353201223	-0.0266232	-0.140507	0.167410789015727	-0.060121	0.13420638135117	0.00531797657613795	0.00241009629533424
1249	KWMTBOMO08287	CellTypeAll-M4	tan	0.163485879157802	-0.0760315	0.0382985943127752	0.35313048640916	0.363404878738538	0.117245853495063	0.034586832814398	0.192714938946749	-0.119773	0.00602578614937694	-0.185328	-0.0330452	-0.171885
1250	KWMTBOMO08292	CellTypeAll-M3	red	0.0297669122862719	-0.191276	-0.134046	0.344887225966398	0.178736062942298	-0.125013	0.0174335019506189	0.399147368489004	-0.189532	0.223799206542065	-0.270474	0.104137802455864	-0.0602891
1251	KWMTBOMO08298	CellTypeAll-M2	turquoise	0.231763276076915	0.106775597911385	0.23771841553019	0.0486152257537607	0.028678108859486	0.16019834068559	-0.0882964	-0.074989	0.22350406793072	0.0911705913413775	0.148488316272105	0.146750403234741	0.101184474963746
1252	KWMTBOMO08302	CellTypeAll-M5	brown	0.303193590224111	0.328734219949609	0.405645585425962	-0.0470882	0.0879176367635298	0.48203456563468	0.00727495684266397	-0.26444	0.199941232419095	-0.233946	0.231396389722075	-0.12108	-0.0929759
1253	KWMTBOMO08310	CellTypeAll-M8	blue	0.259387287236295	0.0810166727242685	0.26861760416464	-0.0461031	-0.106544	0.0867654747129375	-0.234996	-0.179319	0.43137528613677	0.257252584139146	0.284879835046484	0.357669710095876	0.289748455747737
1254	KWMTBOMO08318	CellTypeAll-M10	purple	0.083318730372049	0.331713420699705	0.142898188134513	-0.132487	-0.143238	0.175693173465514	-0.110454	-0.195045	0.0205514157750757	-0.143637	0.297881769123654	-0.0951734	0.053184257995724
1255	KWMTBOMO08319	CellTypeAll-M10	purple	0.133805963009146	0.329448133693661	0.210434456911444	-0.128146	-0.120872	0.191309347236525	-0.102611	-0.195606	0.111390199085317	-0.109448	0.301533069340306	-0.0409002	0.104999937022259
1256	KWMTBOMO08320	CellTypeAll-M6	yellow	-0.00383737	-0.0664117	-0.0517483	0.125622139676509	0.195212012568729	-0.000349431	0.263953514032414	0.159806633487444	-0.130815	-0.022957	-0.142197	-0.0645694	-0.076654
1257	KWMTBOMO08321	CellTypeAll-M7	green	0.100528952126571	-0.146083	-0.0614737	0.3865788909997	0.210948102447229	-0.0342073	-0.0659672	0.35689574817838	-0.158927	0.184412757531888	-0.230343	0.0949177558233738	-0.0783723
1258	KWMTBOMO08325	CellTypeAll-M2	turquoise	0.177954990733263	0.152092002603159	0.237860979070031	-0.0237648	0.00386696960714821	0.199850084682015	-0.0589468	-0.123587	0.17074117196506	-0.0432944	0.1305578456877	0.019562475057646	0.0227932074140676
1259	KWMTBOMO08326	CellTypeAll-M3	red	0.0752082587570395	-0.0446209	0.00538477508891103	0.161847695384142	0.0728497912750673	-0.00835229	-0.0115056	0.104822342294203	-0.00247748	0.117132323492862	-0.0317961	0.0948574867017931	0.0268315801909819
1260	KWMTBOMO08330	CellTypeAll-M5	brown	0.191499823693655	0.220182271270544	0.205653606326675	0.0536177496854073	0.09040020605936	0.288698691303546	-0.0129758	-0.0826148	0.0303676484146316	-0.119217	0.0931317773004074	-0.0824165	-0.0758301
1261	KWMTBOMO08334	CellTypeAll-M2	turquoise	0.213334676534299	0.242156413387764	0.306767204971012	-0.0568362	0.0318426032417837	0.336078120085704	-0.017111	-0.195381	0.156417728488015	-0.151629	0.164691999993491	-0.0704007	-0.0555756
1262	KWMTBOMO08339	CellTypeAll-M5	brown	0.195082267577277	0.213500266652835	0.251399817339562	0.00741527916816826	0.16071543023902	0.34792382008329	0.11046217362272	-0.128041	0.0649844628787493	-0.200075	0.086250022345128	-0.137387	-0.122025
1263	KWMTBOMO08356	CellTypeAll-M3	red	0.0899660180142717	-0.0830189	-0.0411387	0.332882259557915	0.134522596377399	-0.00477605	-0.0562317	0.209820400211114	-0.120863	0.114853694692043	-0.130957	0.0546517792298585	-0.0319982
1264	KWMTBOMO08361	CellTypeAll-M2	turquoise	0.345433048408332	0.278962049781065	0.388711233913752	0.0191961249072447	0.0670813826174375	0.357685813782583	-0.0442005	-0.169406	0.218857350577832	-0.100792	0.207887840340991	-0.00622588	0.000646953298224123
1265	KWMTBOMO08364	CellTypeAll-M5	brown	0.358088934791711	0.311571154079904	0.416212718039709	0.0726330354385638	0.155687745322731	0.475831036010253	-0.0717319	-0.201825	0.182362127968871	-0.174267	0.168241403892058	-0.0723698	-0.087627
1266	KWMTBOMO08367	CellTypeAll-M5	brown	0.190218101432276	0.198291277555318	0.203838259033007	0.0348875661914349	0.0669059218287413	0.258351141494347	-0.0203035	-0.0846317	0.0587949791363101	-0.0882893	0.10443357145146	-0.0517416	-0.0519481
1267	KWMTBOMO08370	CellTypeAll-M8	blue	0.254176613914569	0.145963540967342	0.298842351117704	-0.103063	-0.0964732	0.156056106896714	-0.133578	-0.218042	0.380488439807554	0.0841728641039894	0.277121159296397	0.195323680571429	0.184776885438771
1268	KWMTBOMO08376	CellTypeAll-M2	turquoise	0.225888672076389	0.148319340443149	0.264535401925478	-0.0666823	-0.0579938	0.156439561954379	-0.0868833	-0.145547	0.267156293185776	0.0262250802848865	0.1899440971339	0.108152770288941	0.103072770802119
1269	KWMTBOMO08386	CellTypeAll-M4	tan	0.110295742553436	-0.0247729	0.0571809792889519	0.233672356191522	0.317396386866777	0.143846780033674	0.0745514617637038	0.113308390175996	-0.0830087	-0.050773	-0.110265	-0.0740121	-0.145902
1270	KWMTBOMO08390	CellTypeAll-M8	blue	0.0847313188215619	0.0441917425287595	0.184600030566546	-0.231669	-0.193124	0.0376130648182981	-0.174827	-0.37939	0.467955298031874	0.0671054132129001	0.366745390097108	0.183762585244715	0.252612633024147
1271	KWMTBOMO08391	CellTypeAll-M8	blue	0.249363345973099	0.118589077231122	0.320730719089013	-0.0515889	-0.0543571	0.198223471204593	-0.179829	-0.251686	0.411482812456333	0.0792351064093657	0.282103819786381	0.181457794759379	0.157912946869748
1272	KWMTBOMO08396	CellTypeAll-M2	turquoise	0.247054485400904	0.175770791235451	0.300120860339431	-0.028317	-0.00352857	0.216143696884559	-0.078911	-0.148835	0.246160916956687	-0.0136538	0.179643378825031	0.0700071719667702	0.0623003332264744
1273	KWMTBOMO08399	CellTypeAll-M12	black	0.0555566698318418	-0.00227594	0.0567313225712688	-0.205285	-0.286869	-0.170668	-0.148528	-0.195249	0.390932019479178	0.381202046091966	0.328503289284644	0.464065394173657	0.617640740103744
1274	KWMTBOMO08400	CellTypeAll-M5	brown	0.164066600742965	0.257218008753008	0.191996875290399	-0.0113268	0.0195137841420056	0.258810500915172	-0.0388066	-0.111875	0.0427772324195411	-0.109736	0.132142266026951	-0.0689765	-0.0255636
1275	KWMTBOMO08402	CellTypeAll-M5	brown	0.155737378995382	0.192269461968939	0.207572407283551	0.0186802386137982	0.0979193308592495	0.290298310318299	0.00482991123981062	-0.111867	0.0572026412799011	-0.145642	0.0821470148618419	-0.0982062	-0.0888528
1276	KWMTBOMO08403	CellTypeAll-M2	turquoise	0.17847621073714	0.14736856362591	0.230609271008566	-0.0275195	0.0172107479794979	0.21554383933111	-0.0282036	-0.133908	0.151928597336675	-0.0662542	0.128516901467075	-0.00569562	-0.0105416
1277	KWMTBOMO08404	CellTypeAll-M8	blue	0.196176798124968	0.107371201943914	0.239721407081485	-0.12181	-0.122371	0.0995173018920215	-0.131181	-0.198837	0.359336623339223	0.111851100293381	0.255585752103619	0.205734981419493	0.193949389095186
1278	KWMTBOMO08424	CellTypeAll-M6	yellow	-0.0242414	-0.0454906	-0.048266	0.0670421821262334	0.253546201264617	0.0537616754639657	0.386752785006235	0.110432852952425	-0.15153	-0.134526	-0.130421	-0.151078	-0.118574
1279	KWMTBOMO08430	CellTypeAll-M2	turquoise	0.419300323768017	0.221980332949957	0.478069363406612	0.0665003357145246	0.083392526428364	0.371400404386309	-0.158074	-0.176565	0.32878892933787	-0.0408299	0.221169566848552	0.0744565144629209	0.0246307091869457
1280	KWMTBOMO08435	CellTypeAll-M8	blue	0.267859826229446	0.15991753816863	0.299798301852969	-0.0336686	-0.0327837	0.184908327254699	-0.101794	-0.140645	0.286820546854242	0.0398107687862388	0.19720924414556	0.123836602439842	0.108144051950444
1281	KWMTBOMO08440	CellTypeAll-M12	black	0.0896042337539475	0.057236017854871	0.106445591655999	-0.233923	-0.3195	-0.133634	-0.185893	-0.271118	0.4434791245673	0.37966662021056	0.405411657910716	0.487590775111046	0.663355952094065
1282	KWMTBOMO08441	CellTypeAll-M5	brown	0.258905882144527	0.118579161607199	0.237146267280537	0.199636383125205	0.253146836693539	0.317018794879866	0.0407697558046979	0.0445020370004679	0.0289585720731717	-0.0770404	-0.0137097	-0.0582602	-0.147133
1283	KWMTBOMO08448	CellTypeAll-M5	brown	0.197472283615325	0.387091622500703	0.261329309353273	-0.0174403	0.0564352451993731	0.393834729990626	-0.0132126	-0.164071	0.02275519798431	-0.209839	0.169185623995942	-0.151657	-0.0809037
1284	KWMTBOMO08458	CellTypeAll-M8	blue	0.0902638458327535	0.00753194710415878	0.0840221689818057	-0.0826074	-0.108654	-0.0272029	-0.102325	-0.119389	0.247253944055346	0.179933785271407	0.188014667091166	0.235761886258575	0.209833658848187
1285	KWMTBOMO08460	CellTypeAll-M11	magenta	0.105720912757913	-0.00390761	0.0520478063615007	0.00866979370020683	-0.0645662	-0.0500133	-0.0908596	-0.00711158	0.173929227307158	0.24960404002205	0.113921101051437	0.298662524159068	0.232231668634002
1286	KWMTBOMO08464	CellTypeAll-M10	purple	0.257884672838808	0.787936991607519	0.49159618125486	-0.504446	-0.445215	0.474568451803965	-0.32096	-0.743711	0.434292972879958	-0.231821	0.74216309604077	0.0051217434694509	0.328565678883538
1287	KWMTBOMO08469	CellTypeAll-M2	turquoise	0.234558775233141	0.172708159437988	0.285795241595652	-0.013279	0.0133121055736337	0.236798683905481	-0.0773883	-0.142532	0.203521634503725	-0.0359222	0.166296246981003	0.0368667730624118	0.025900925874851
1288	KWMTBOMO08487	CellTypeAll-M3	red	0.103245822929467	-0.0677313	0.00452707648601564	0.202680284013458	0.117917719577933	-0.0073394	0.0188108216005402	0.18939007493783	-0.0363183	0.1331228225868	-0.10154	0.0984534577506383	0.0123124113421556
1289	KWMTBOMO08492	CellTypeAll-M2	turquoise	0.199532105545914	0.110800918148744	0.198501631185346	0.0395801638858545	0.0318475744843634	0.147844147080574	-0.0504561	-0.049719	0.145466568356431	0.0310615195767443	0.104122386372962	0.073435279071653	0.0473553463733572
1290	KWMTBOMO08524	CellTypeAll-M6	yellow	0.103886310913125	0.0302625135907825	0.0872801741702209	0.134751307911524	0.193930296844454	0.157836562437771	0.0729096666343342	0.039860659125889	-0.0401301	-0.0841402	-0.0486272	-0.0813516	-0.110346
1291	KWMTBOMO08525	CellTypeAll-M3	red	0.180759474249916	-0.0680919	0.0606774767682629	0.344989047199832	0.270074972544434	0.101121261821116	0.0475330288936553	0.192702271157663	-0.0667778	0.0665351400723859	-0.127755	0.0345337885154948	-0.0811826
1292	KWMTBOMO08538	CellTypeAll-M10	purple	0.202754936434432	0.271852024354666	0.231353783143837	-0.0877787	-0.0790322	0.178644519532888	-0.0825978	-0.182549	0.185440143642093	0.0082696888745933	0.266398126517957	0.0959089764017973	0.199505888531869
1293	KWMTBOMO08540	CellTypeAll-M2	turquoise	0.270362011437993	0.183692298432447	0.270584708181801	0.00676276207166783	0.0280902051792215	0.224090910205873	0.00125130231438363	-0.101201	0.179496483674163	-0.00353718	0.164722780646107	0.0640330963326008	0.0770256646626898
1294	KWMTBOMO08542	CellTypeAll-M5	brown	0.233258248429946	0.183624130506278	0.252934990602715	0.0768958132394803	0.095834919857179	0.286708245229401	-0.0485525	-0.0853117	0.0998662826667515	-0.0774317	0.0992450030984206	-0.0292306	-0.05159
1295	KWMTBOMO08543	CellTypeAll-M12	black	0.144879484277006	0.0191701870169706	0.102399242634087	-0.0460216	-0.19601	-0.105513	-0.223296	-0.141719	0.366417115815352	0.414309074689548	0.305077366367544	0.490684475333857	0.566528665859826
1296	KWMTBOMO08552	CellTypeAll-M2	turquoise	0.218644934699679	0.205616354729699	0.274038918109117	0.0309437579297109	0.062733157034821	0.275778865762897	-0.0778955	-0.116348	0.137406067012726	-0.0753893	0.127798613718486	-0.0198866	-0.0219231
1297	KWMTBOMO08559	CellTypeAll-M5	brown	0.217776147982608	0.491098092696695	0.345400745620935	-0.210002	-0.0625566	0.456927787561468	0.0539085594402667	-0.320925	0.119354191556927	-0.285681	0.292938333955136	-0.180186	-0.0466169
1298	KWMTBOMO08563	CellTypeAll-M1	greenyellow	0.209804587439877	0.584719557392076	0.313308433314171	-0.171969	-0.140331	0.408700062301752	-0.145763	-0.305112	0.0867180277735036	-0.205192	0.341296083631342	-0.121185	0.0236219992764986
1299	KWMTBOMO08565	CellTypeAll-M1	greenyellow	0.25322929542621	0.278487217227249	0.265836336328359	0.00579132993860754	0.0112657722615952	0.266229219490452	-0.0654002	-0.121508	0.122768273542765	-0.0620164	0.170979817198825	-0.00440813	0.0270806618427193
1300	KWMTBOMO08566	CellTypeAll-M1	greenyellow	0.205285368771184	0.306269475571364	0.257726158290014	-0.0380996	-0.0145584	0.288348796623888	-0.0793882	-0.158591	0.108699326253006	-0.109093	0.18288259320235	-0.0505351	-0.00572903
1301	KWMTBOMO08584	CellTypeAll-M5	brown	0.32049471351436	0.365979663827632	0.356794493875737	0.0601719605360007	0.129876397638793	0.438917709618877	0.0441579388288546	-0.139866	0.0973581447168788	-0.179761	0.181580936807275	-0.109857	-0.0494198
1302	KWMTBOMO08587	CellTypeAll-M6	yellow	0.0901761241424671	0.0208498292235025	0.0733580098022044	0.0970650288753592	0.167676123752146	0.131133359062363	0.10017094716692	0.026827123004234	-0.0271953	-0.0685279	-0.0390664	-0.0647852	-0.0855116
1303	KWMTBOMO08588	CellTypeAll-M2	turquoise	0.188782549048471	0.158919386401826	0.219768530400841	-0.0669518	-0.0653781	0.14346348998354	-0.0916043	-0.158024	0.225466681703195	0.0336336023753171	0.205582220670437	0.107682986414037	0.116408909749646
1304	KWMTBOMO08590	CellTypeAll-M1	greenyellow	0.345188016316299	0.497663123667166	0.434721664870421	-0.0143428	0.0211273163818017	0.51599916142188	-0.169187	-0.275464	0.17282766708493	-0.206008	0.280446087645581	-0.102974	-0.0485032
1305	KWMTBOMO08593	CellTypeAll-M2	turquoise	0.164157328134639	0.135540016004113	0.188181672383508	-0.0347464	-0.020589	0.12835373965817	-0.0328134	-0.105424	0.165837377300119	0.00909263042329228	0.143193038333908	0.0667555683678555	0.0878432410597906
1306	KWMTBOMO08597	CellTypeAll-M5	brown	0.1925650710928	0.356682371268013	0.235697445920976	0.0415836116802706	0.111341105511255	0.435224673168189	0.00253971978611033	-0.148333	-0.0494574	-0.269449	0.126347757771257	-0.220617	-0.183857
1307	KWMTBOMO08618	CellTypeAll-M2	turquoise	0.252301730557037	0.198103083182223	0.326798456438406	-0.065982	-0.0345884	0.245812351173328	-0.0990139	-0.196624	0.273735360264572	-0.0329885	0.2125225228194	0.0617038553309194	0.0642270813380773
1308	KWMTBOMO08626	CellTypeAll-M8	blue	-0.0248544	-0.0998558	0.0337127339588463	-0.28665	-0.285305	-0.153421	-0.217009	-0.360579	0.473704824010023	0.204741416661005	0.37183190583521	0.301456882923797	0.352259964254897
1309	KWMTBOMO08632	CellTypeAll-M2	turquoise	0.381877341338143	0.377063719448356	0.49982459222827	-0.193405	-0.145064	0.344773215423302	-0.165552	-0.363112	0.465848555480497	-0.0433566	0.413339103574652	0.122808698981045	0.201148605286151
1310	KWMTBOMO08633	CellTypeAll-M8	blue	0.427619834214832	0.390287184768778	0.588569472873394	-0.281906	-0.219437	0.358740562467041	-0.21965	-0.469133	0.638312193788864	-0.0382445	0.497035571945712	0.178478649902874	0.287836854410371
1311	KWMTBOMO08634	CellTypeAll-M8	blue	0.163009170056093	0.0892646494053011	0.181227648402286	-0.0944175	-0.0953188	0.0651505162808682	-0.0918919	-0.151197	0.272498316139644	0.0978468288956079	0.202251097231232	0.178717100088765	0.169657321242487
1312	KWMTBOMO08640	CellTypeAll-M2	turquoise	0.299530737228294	0.236289994836274	0.342233741567961	-0.0301048	-0.0346388	0.24517970215296	-0.116979	-0.168848	0.28140676295752	0.00503358365705506	0.2351511446633	0.0983340230074966	0.109847004496902
1313	KWMTBOMO08641	CellTypeAll-M2	turquoise	0.311670124894867	0.177748682271063	0.304455739316664	0.0699145740786887	0.109390878861518	0.254875871732575	0.00446967789287686	-0.0725244	0.184155364360504	-0.0168272	0.137036089492571	0.0466007171187595	0.0366214086910852
1314	KWMTBOMO08651	CellTypeAll-M2	turquoise	0.253248978961994	0.199390794981593	0.288197209217526	0.0224128027892588	0.0467998213763627	0.2564156741322	-0.0532953	-0.114261	0.169299859259479	-0.0496163	0.144766586372269	0.015168368096792	0.0178565712327009
1315	KWMTBOMO08652	CellTypeAll-M10	purple	0.126181013556669	0.258472821426193	0.159941039759643	-0.153099	-0.143742	0.0956337724364882	-0.0188156	-0.192433	0.197101313418598	0.0669638034654747	0.309076094124159	0.141636810247153	0.283121557646056
1316	KWMTBOMO08655	CellTypeAll-M2	turquoise	0.234612429577416	0.237613901747494	0.285083474658178	0.00521612823593666	0.034948292945859	0.261733121436513	-0.0316611	-0.125799	0.174470902647031	-0.0510321	0.17440958896314	0.0169567069244743	0.0506144089447976
1317	KWMTBOMO08666	CellTypeAll-M12	black	-0.0249605	-2.64e-05	0.0240850762146773	-0.38883	-0.394536	-0.239113	-0.0336469	-0.275722	0.418077817688778	0.330596357289903	0.364264892029553	0.441595728377297	0.694460955393146
1318	KWMTBOMO08667	CellTypeAll-M5	brown	0.169413508076359	0.320073770579633	0.194021410091131	-0.021358	-0.0071398	0.28708580543746	-0.0695756	-0.127311	0.0157341598512966	-0.119468	0.157481716783906	-0.0823274	-0.0279366
1319	KWMTBOMO08668	CellTypeAll-M1	greenyellow	0.151499559015743	0.39474456377262	0.188748607415951	-0.0544329	-0.0447097	0.293299958189109	-0.080878	-0.151383	-0.00800684	-0.145788	0.178538794209357	-0.112134	-0.0305858
1320	KWMTBOMO08670	CellTypeAll-M5	brown	0.246696189434693	0.192809867990958	0.260235282321794	0.0778807344606627	0.106386197433284	0.292555984602827	-0.0412518	-0.0860302	0.0982295529146864	-0.0887078	0.09586070086695	-0.0385982	-0.0586502
1321	KWMTBOMO08671	CellTypeAll-M2	turquoise	0.214000135939283	0.116155302386697	0.226910443727457	0.063755729078003	0.0486903244837878	0.176545806195336	-0.101348	-0.064715	0.167762228148794	0.0409271346626035	0.111399036425834	0.0889027601358616	0.0402028466911347
1322	KWMTBOMO08672	CellTypeAll-M8	blue	0.129148037198039	-0.0276109	0.0950516536462469	-0.02767	-0.100216	-0.0404895	-0.160389	-0.0858763	0.295639417120361	0.267081286625235	0.187279860734169	0.308986708778876	0.238417366557952
1323	KWMTBOMO08673	CellTypeAll-M2	turquoise	0.233988850083562	0.182760940125513	0.353134984040765	-0.106599	-0.0407604	0.281393249749419	-0.0811143	-0.24654	0.300530061012373	-0.0862952	0.213287688466337	0.0199351170791256	0.0195549741375359
1324	KWMTBOMO08679	CellTypeAll-M6	yellow	0.127773971890117	0.0315477438366899	0.142520360699755	0.0447161500955146	0.21509040845452	0.197108881849872	0.240776180978729	-0.0268225	0.0375505557266983	-0.138864	-0.0253106	-0.100905	-0.121438
1325	KWMTBOMO08691	CellTypeAll-M2	turquoise	0.402825790460458	0.283684659269507	0.401912901830851	0.00858913279944469	0.00134264283720365	0.302037844927774	-0.107791	-0.170849	0.304460998565238	0.0329093197591841	0.266099652788328	0.140220856824761	0.142501860232858
1326	KWMTBOMO08695	CellTypeAll-M5	brown	0.224470355898418	0.357863129349438	0.325756578124031	-0.0602927	0.0119446433756547	0.428040826268922	-0.0733616	-0.241325	0.12847564085508	-0.209349	0.217376024143746	-0.124148	-0.0714021
1327	KWMTBOMO08699	CellTypeAll-M12	black	0.147635163533669	0.0390940515944433	0.116836378697672	-0.0905169	-0.212532	-0.102217	-0.168407	-0.162616	0.387864666102915	0.414114124711202	0.331438994154342	0.499547045161832	0.615074285657219
1328	KWMTBOMO08706	CellTypeAll-M2	turquoise	0.28350232111937	0.321797166674282	0.401551787551244	-0.111937	-0.0290231	0.382983805227918	-0.0793653	-0.29179	0.279708364992924	-0.138766	0.284570911532489	-0.0263825	0.0128396713300538
1329	KWMTBOMO08707	CellTypeAll-M8	blue	0.216339397773434	0.148487216212053	0.212710590233731	-0.0403964	-0.0672527	0.120250506965858	-0.102471	-0.113474	0.242718323274317	0.101856285749482	0.201997635622398	0.164259485239537	0.149866934897377
1330	KWMTBOMO08708	CellTypeAll-M9	pink	0.125698520829914	-0.0587924	0.0101051780358067	0.145325019296978	-0.00304379	-0.0758584	-0.110612	0.175547772415764	0.0658893808428535	0.323916598682628	-0.0127995	0.262171617298128	0.139414722420657
1331	KWMTBOMO08715	CellTypeAll-M8	blue	0.124593496192551	0.0238555176317231	0.129915897241209	-0.0992096	-0.111003	0.00573712300398038	-0.101525	-0.14166	0.282279785262304	0.147819407449075	0.197877727553786	0.218831029165246	0.195032109955795
1332	KWMTBOMO08724	CellTypeAll-M8	blue	0.109700164760264	0.0909440908706659	0.180842264545312	-0.255477	-0.230652	0.01685380644327	-0.177926	-0.386611	0.471347830794958	0.13911908184766	0.442234978148623	0.274888958805705	0.347867659712729
1333	KWMTBOMO08727	CellTypeAll-M2	turquoise	0.227328133605573	0.195870997927284	0.261801339838146	0.0575248741519552	0.085857662957649	0.278364783745872	-0.0498755	-0.0978629	0.121792533349866	-0.0718809	0.114784199771384	-0.018163	-0.0230213
1334	KWMTBOMO08734	CellTypeAll-M1	greenyellow	0.240824242846287	0.37959923034514	0.302514689201344	-0.0639701	-0.0371609	0.349220260648676	-0.110753	-0.218947	0.140143039766795	-0.132096	0.240025921223031	-0.057309	-0.005447
1335	KWMTBOMO08739	CellTypeAll-M3	red	0.14325907956683	-0.133782	0.00065475440962483	0.534824012132442	0.430262806342528	0.12864559496663	-0.0554102	0.317372203051399	-0.219082	0.0224274863987036	-0.271369	-0.0498185	-0.241985
1336	KWMTBOMO08740	CellTypeAll-M5	brown	0.214377624309122	0.199706230307452	0.239795567038886	0.074214864899607	0.135510780992744	0.313190951761804	0.00961855234306561	-0.0802175	0.0572970847253514	-0.127245	0.0843104299934397	-0.0834784	-0.0866389
1337	KWMTBOMO08747	CellTypeAll-M6	yellow	-0.218031	-0.211293	-0.219482	-0.0619819	0.297932318270871	-0.106686	0.869231417171317	0.193528102836112	-0.286343	-0.247952	-0.305683	-0.297666	-0.196265
1338	KWMTBOMO08751	CellTypeAll-M6	yellow	-0.25442	-0.310588	-0.328039	0.0474959703241928	0.276078766637999	-0.243952	0.818088537596689	0.41476403752683	-0.385619	-0.0868391	-0.423942	-0.217438	-0.168175
1339	KWMTBOMO08752	CellTypeAll-M6	yellow	-0.139327	-0.12667	-0.138195	-0.0636154	0.184774940343978	-0.0654235	0.661854419768557	0.121313739993677	-0.180331	-0.17533	-0.181448	-0.201836	-0.100299
1340	KWMTBOMO08753	CellTypeAll-M6	yellow	-0.239526	-0.198638	-0.229129	-0.102649	0.20489581541744	-0.15255	0.848061379596779	0.202706214527552	-0.274582	-0.212183	-0.266738	-0.26657	-0.109453
1341	KWMTBOMO08754	CellTypeAll-M6	yellow	-0.22675	-0.191511	-0.197466	-0.160298	0.209225722915207	-0.112652	0.885132594224455	0.101201012655899	-0.236152	-0.271423	-0.249344	-0.292201	-0.136586
1342	KWMTBOMO08755	CellTypeAll-M2	turquoise	0.229519334366895	0.137249881795454	0.228907662832004	0.0181675815744488	0.0122475125547336	0.167991614834829	-0.0579519	-0.0821832	0.174748558579086	0.0203015260685796	0.131367422649184	0.0753965367577019	0.0557266233506338
1343	KWMTBOMO08759	CellTypeAll-M8	blue	0.207310720220314	0.0812152139681787	0.21731693983072	-0.087164	-0.101086	0.0749727329631285	-0.125719	-0.14709	0.327004611084839	0.141181445838111	0.216166027698602	0.223883074780904	0.189055129954848
1344	KWMTBOMO08760	CellTypeAll-M7	green	0.129956160041108	-0.117419	-0.0610152	0.346183007921626	0.138830867779616	-0.101787	-0.131018	0.398643148849862	-0.110996	0.337645323723456	-0.197026	0.21810327191562	0.0185475834860996
1345	KWMTBOMO08776	CellTypeAll-M11	magenta	0.138551703051422	-0.0245467	0.0549899443400454	0.0187517136526652	-0.136509	-0.116171	-0.18132	-0.00919755	0.27343487814589	0.414243143827441	0.192980467751379	0.475493747228876	0.401673418318696
1346	KWMTBOMO08797	CellTypeAll-M12	black	0.0916909415701914	0.00707300807077643	0.0886253104719208	-0.200321	-0.318543	-0.169906	-0.206934	-0.225984	0.446834790674842	0.424786753863344	0.376887459666886	0.524282294377172	0.684996369081409
1347	KWMTBOMO08802	CellTypeAll-M8	blue	0.11463848729922	0.0399564494390782	0.115353038749619	-0.0944534	-0.106828	0.00338932475355626	-0.0851651	-0.133039	0.252357366733749	0.143270851923014	0.194311168941663	0.211393176418425	0.202868395642382
1348	KWMTBOMO08813	CellTypeAll-M8	blue	0.313574886013241	0.208957656399345	0.398422704715291	-0.121292	-0.0751642	0.260183746365711	-0.120629	-0.261881	0.411111712219529	-0.00210679	0.289769038199033	0.13064880263829	0.127242194425728
1349	KWMTBOMO08820	CellTypeAll-M12	black	0.0281866536500065	-0.0448786	-0.0164412	-0.0901822	-0.227841	-0.227026	-0.159533	-0.0776279	0.299178679010208	0.46219218328514	0.248075278286519	0.503766190424194	0.624757646234712
1350	KWMTBOMO08828	CellTypeAll-M5	brown	0.198717435470489	0.529903589785025	0.322565808013075	-0.187852	-0.0873369	0.447703632541183	-0.0469309	-0.324723	0.110199947002495	-0.255854	0.311557972554648	-0.161659	-0.0137925
1351	KWMTBOMO08843	CellTypeAll-M5	brown	0.167272980471958	0.378908280792949	0.207031657217998	0.0532077233593332	0.103287034516259	0.366464726909569	-0.0163022	-0.0998102	-0.0457153	-0.194434	0.102418136692762	-0.161543	-0.0811146
1352	KWMTBOMO08845	CellTypeAll-M7	green	-0.226189	-0.337722	-0.367482	0.160481261944167	0.203647379284577	-0.324795	0.499336089782321	0.541959859895719	-0.377159	0.125008140241956	-0.444798	-0.0642644	-0.141753
1353	KWMTBOMO08852	CellTypeAll-M4	tan	0.168847291741161	0.0128839211913953	0.095640110316535	0.222858945361492	0.305447624514362	0.180574723448767	0.128228857415826	0.0974135206111078	-0.0579303	-0.049872	-0.086454	-0.053845	-0.118634
1354	KWMTBOMO08861	CellTypeAll-M11	magenta	0.126618387644303	-0.00542671	0.0709103047608898	0.00798899963865786	-0.0673675	-0.0427465	-0.0988535	0.000594211967059699	0.179029780783238	0.236419605572468	0.100386516358354	0.288020730909361	0.200262684343791
1355	KWMTBOMO08865	CellTypeAll-M8	blue	0.196964717250723	0.0475594016984362	0.191838306551461	-0.0100527	-0.0357754	0.0752983516063873	-0.112219	-0.0936995	0.267380470942157	0.141115124666499	0.164670942430046	0.205031870325621	0.144094566407368
1356	KWMTBOMO08868	CellTypeAll-M5	brown	0.343715275437534	0.249173124959008	0.37554354255377	0.0738325511595854	0.143681613801716	0.41510981161873	-0.00808835	-0.144948	0.177447084806832	-0.12135	0.157637332070087	-0.03738	-0.0627805
1357	KWMTBOMO08869	CellTypeAll-M2	turquoise	0.276443745440098	0.123062625306441	0.286609345163413	0.0499396493102285	0.0507330320598025	0.203916650874821	-0.0720387	-0.0872833	0.209763321425072	0.00813095403202716	0.129457573778128	0.0792924869738802	0.0316742102467199
1358	KWMTBOMO08882	CellTypeAll-M3	red	0.096691047431578	-0.0618929	0.0184967038081542	0.279332285197876	0.281921057272666	0.089574001460488	0.0417127040479021	0.169162507475543	-0.114803	0.00474855009486411	-0.152784	-0.0360226	-0.139861
1359	KWMTBOMO08894	CellTypeAll-M12	black	0.0862117444895027	0.0514569125967132	0.0718518705245176	-0.195905	-0.292779	-0.152795	-0.147911	-0.217616	0.39586923971263	0.406018392159692	0.375817311721947	0.497667968271728	0.675539790186239
1360	KWMTBOMO08904	CellTypeAll-M3	red	0.15267783270792	-0.065285	0.046897853803879	0.368299372840562	0.302732282123819	0.116452273789006	0.00323789244625746	0.200910567002689	-0.112695	0.0201635123261325	-0.157507	-0.0253954	-0.142571
1361	KWMTBOMO08906	CellTypeAll-M5	brown	0.217091327031215	0.145382622687383	0.190129288618427	0.186331636400634	0.30776820299638	0.34021560245432	0.169532548080909	0.00951855322005067	-0.0664191	-0.19243	-0.0302505	-0.16967	-0.198322
1362	KWMTBOMO08911	CellTypeAll-M6	yellow	-0.0920225	-0.136004	-0.105076	-0.0283603	0.252668904282997	-0.00672841	0.654049173044706	0.0960709420659888	-0.17282	-0.198969	-0.211556	-0.212291	-0.165093
1363	KWMTBOMO08918	CellTypeAll-M5	brown	0.23706873270355	0.246102025901832	0.251921320237869	0.104439103638199	0.127961717597601	0.328302516873268	-0.0854952	-0.0863588	0.0550292590182117	-0.0979335	0.116708783732513	-0.0612886	-0.0609422
1364	KWMTBOMO08926	CellTypeAll-M3	red	0.219556776465196	-0.105456	0.0590865774628181	0.51977968284705	0.438837091769566	0.135233637099986	-0.0286678	0.321298270314654	-0.148191	0.107973688732474	-0.241444	0.0385304080668667	-0.178072
1365	KWMTBOMO08930	CellTypeAll-M9	pink	0.0500885852815085	-0.16292	-0.0770417	0.0824508257142046	-0.106008	-0.235812	-0.22482	0.143543141652325	0.163427341949425	0.503412602002429	0.0371792962733796	0.441590162119614	0.283332117828147
1366	KWMTBOMO08935	CellTypeAll-M8	blue	0.0449511890042922	-0.0208699	0.0685669299813663	-0.162332	-0.160686	-0.0509579	-0.11039	-0.236313	0.332293867272384	0.154934257822453	0.262435670144919	0.223908896166677	0.245605072682693
1367	KWMTBOMO08946	CellTypeAll-M2	turquoise	0.266543163543926	0.14155129924768	0.259069788459428	0.0517354369026912	0.0325671705631287	0.173608370101157	-0.0802144	-0.0549119	0.198191870687939	0.0578146083227714	0.129233429864451	0.116885894892923	0.0828858913692402
1368	KWMTBOMO08957	CellTypeAll-M6	yellow	-0.0388621	-0.0727418	-0.0523445	-0.0083526	0.170976317538332	0.0127872485499734	0.43136809619635	0.0571851143916091	-0.100053	-0.119154	-0.122931	-0.127837	-0.0989678
1369	KWMTBOMO08959	CellTypeAll-M2	turquoise	0.285170833765136	0.206557844492887	0.296911207126343	0.0708488570961525	0.0974400810438604	0.292670318550282	-0.0401526	-0.100443	0.147051995749351	-0.0538456	0.137480149128356	0.00621433615134343	-0.0148713
1370	KWMTBOMO08960	CellTypeAll-M8	blue	0.357964949422018	0.239337192472878	0.446976673892099	-0.0747509	-0.0447328	0.327545635910471	-0.142508	-0.264903	0.401250120046765	-0.0204636	0.287697791162216	0.112780924266228	0.0934009893368063
1371	KWMTBOMO08961	CellTypeAll-M12	black	0.095816889089526	0.0791434698542301	0.140889742293697	-0.336719	-0.377121	-0.125896	-0.147576	-0.313942	0.490245054516882	0.321960762210789	0.429010817926787	0.453464549928045	0.662646549666579
1372	KWMTBOMO08964	CellTypeAll-M8	blue	0.24385726961704	0.121641097100854	0.25095999828032	-0.0859403	-0.104107	0.0990539832504644	-0.12773	-0.166327	0.353907567558632	0.143485456884031	0.253092971617217	0.239230330836343	0.213205591981381
1373	KWMTBOMO08965	CellTypeAll-M3	red	0.162296001968869	-0.0114588	0.0669773748047425	0.358624884238015	0.308606666341893	0.16386625951295	0.0276287905152116	0.182360029705933	-0.131136	-0.0331667	-0.14016	-0.066616	-0.147591
1374	KWMTBOMO08968	CellTypeAll-M3	red	0.239673114977683	0.0247358578922937	0.0814159843487548	0.599100511873736	0.369354327599809	0.192675302341951	-0.189085	0.324991319601194	-0.201961	0.0715309473918322	-0.199929	0.000392875692514245	-0.153788
1375	KWMTBOMO08974	CellTypeAll-M1	greenyellow	0.211590831394963	0.622213975879895	0.307994979907928	-0.219737	-0.1997	0.391389135716479	-0.155152	-0.342804	0.116281773949462	-0.191494	0.382125713119006	-0.0990676	0.0689488997923801
1376	KWMTBOMO08979	CellTypeAll-M8	blue	0.194068208633066	0.084100705102653	0.187355739421023	-0.00860981	-0.031656	0.088471976042409	-0.0860241	-0.0768431	0.213876098728428	0.0916109801851901	0.14340324724288	0.150587090552638	0.121974697909858
1377	KWMTBOMO08981	CellTypeAll-M5	brown	0.246654264844956	0.232516558577124	0.236012811369113	0.0722577289140788	0.0798101453366094	0.298548965776761	-0.0347727	-0.0735555	0.0632972997936564	-0.0784937	0.119750344186935	-0.0389881	-0.0510687
1378	KWMTBOMO08983	CellTypeAll-M12	black	0.135495062859847	0.052941667096635	0.123230288048559	-0.152499	-0.287014	-0.126753	-0.230698	-0.208957	0.431717621150999	0.42098554370051	0.372147072504664	0.518261129446706	0.665761797746498
1379	KWMTBOMO09011	CellTypeAll-M5	brown	0.179870273034821	0.1981051291266	0.189238310674148	0.0359456238728168	0.0518834875186434	0.242307873644804	-0.041579	-0.0803966	0.050874373265371	-0.0786571	0.103720376315084	-0.0425753	-0.0396161
1380	KWMTBOMO09043	CellTypeAll-M5	brown	0.306715680996267	0.338806290462765	0.361170977026783	0.0691543339849328	0.168422786021095	0.474518585629409	-0.012406	-0.160766	0.0911839246601953	-0.211056	0.148751367690507	-0.134742	-0.125536
1381	KWMTBOMO09051	CellTypeAll-M6	yellow	0.101852045867619	0.128585708668031	0.10092787557165	0.0749700619792385	0.201220420995434	0.244168818238845	0.180702318841305	-0.0252444	-0.0825584	-0.182192	-0.0255794	-0.170236	-0.174114
1382	KWMTBOMO09053	CellTypeAll-M8	blue	0.176472034766417	0.0825487651828139	0.172542487708232	-0.0338294	-0.0674176	0.059956638892117	-0.0978124	-0.0885528	0.231847262381752	0.120278008835716	0.165609723925562	0.179253845754412	0.153475466737375
1383	KWMTBOMO09054	CellTypeAll-M2	turquoise	0.309970359912567	0.441947756704942	0.436921584768232	-0.164449	-0.128274	0.324555271522653	-0.153939	-0.307572	0.360159826947326	-0.0623202	0.371042608389659	0.0793798866416306	0.215745399471139
1384	KWMTBOMO09055	CellTypeAll-M2	turquoise	0.288108891303198	0.428634603705961	0.424095500247409	-0.149322	-0.104215	0.369256787055322	-0.143854	-0.303588	0.294743474130931	-0.125551	0.336513276671076	-5.63e-06	0.114769350359661
1385	KWMTBOMO09058	CellTypeAll-M7	green	0.0645474474760625	-0.0619214	-0.0311845	0.0695412430522651	-0.0231673	-0.0925269	-0.0162428	0.134739753528055	0.0312181483460973	0.221902188003661	-0.0137978	0.190793262458833	0.131129741776682
1386	KWMTBOMO09080	CellTypeAll-M2	turquoise	0.337286584636367	0.184416741291611	0.378120606418692	0.0709692143329904	0.073685547167253	0.293904767743287	-0.113835	-0.153003	0.296456717692507	0.0201355908329083	0.211140932174312	0.112877173034028	0.0733961358688521
1387	KWMTBOMO09090	CellTypeAll-M6	yellow	-0.0553012	-0.0584261	-0.0580935	-0.0182289	0.0954313827613225	-0.0379737	0.357642180134046	0.0751447251586527	-0.0775181	-0.0638226	-0.0760502	-0.0783384	-0.0147843
1388	KWMTBOMO09093	CellTypeAll-M2	turquoise	0.270734654334671	0.171167403439449	0.280093322259673	0.0938887564549689	0.106155429917176	0.267385824139653	-0.0456563	-0.0601828	0.144469604513277	-0.0248987	0.107212859656422	0.025906976640434	-0.0059876
1389	KWMTBOMO09096	CellTypeAll-M2	turquoise	0.247408267006172	0.198137558314675	0.263219756926176	-0.0312064	-0.00949443	0.198203586383137	-0.0372659	-0.130694	0.210362415020988	0.00875380048309636	0.188150594041534	0.0810839184951487	0.0923209168716617
1390	KWMTBOMO09106	CellTypeAll-M2	turquoise	0.261979018749871	0.194192237710963	0.316897046041264	-0.0611382	-0.0411521	0.215881910297424	-0.0927746	-0.180332	0.28575346624151	-0.00137188	0.214315217197596	0.0938279833031439	0.0966742196744049
1391	KWMTBOMO09111	CellTypeAll-M6	yellow	-0.0287715	-0.0457189	-0.0267893	-0.0510544	0.0996480236557072	-0.00693148	0.367621351341896	0.0280612599098751	-0.0446555	-0.0821817	-0.0473485	-0.0809414	-0.0114592
1392	KWMTBOMO09119	CellTypeAll-M5	brown	0.275776692010915	0.276828035326325	0.289799239165326	0.144427058639906	0.2041113183976	0.42408987810091	0.00468260298212257	-0.069015	0.0240740173542755	-0.15561	0.0789793327899858	-0.116562	-0.146476
1393	KWMTBOMO09124	CellTypeAll-M5	brown	0.195447947531123	0.152283812366718	0.193348255036324	0.0964701031015182	0.149684708497838	0.270181976905253	0.0502876355542003	-0.0471558	0.035789198012517	-0.100691	0.050840934154938	-0.0676531	-0.0868831
1394	KWMTBOMO09127	CellTypeAll-M9	pink	0.0270736559308755	-0.133091	-0.09361	0.142648582719943	-0.00629147	-0.153353	-0.078694	0.209384531280622	-0.00932764	0.31251341598853	-0.0804289	0.225789718029652	0.106019817104713
1395	KWMTBOMO09133	CellTypeAll-M8	blue	0.251448913748114	0.129584282559453	0.274176554244598	-0.0394896	-0.0371834	0.159065832172224	-0.0898198	-0.126188	0.286250497158842	0.0555705726948299	0.183927233614294	0.135494645093455	0.11036010026042
1396	KWMTBOMO09136	CellTypeAll-M6	yellow	-0.198661	-0.16977	-0.180777	-0.125258	0.210902547124406	-0.094723	0.844278990834089	0.122042484801246	-0.231165	-0.250429	-0.239339	-0.277532	-0.135953
1397	KWMTBOMO09140	CellTypeAll-M8	blue	0.0471109106538511	-0.0251016	0.13045104239261	-0.296216	-0.264483	-0.0729625	-0.213605	-0.453778	0.545626225641509	0.175586708937334	0.465197170748236	0.318774140757407	0.388322696088008
1398	KWMTBOMO09147	CellTypeAll-M2	turquoise	0.22539325649865	0.161212469413755	0.239817131053083	-0.0257708	-0.0326323	0.151278351790561	-0.0797694	-0.112495	0.21045218540338	0.0298905671353501	0.16953166829414	0.10153830452667	0.0992692291685475
1399	KWMTBOMO09152	CellTypeAll-M2	turquoise	0.275997107805838	0.142183110925199	0.321979472497601	0.0332827248907626	0.0641727285734137	0.263414126796877	-0.0760247	-0.133509	0.229950191686401	-0.0326747	0.150344225705954	0.0442700936325231	0.00909596783379149
1400	KWMTBOMO09181	CellTypeAll-M7	green	0.0496920000105449	-0.0868012	-0.0441285	0.149080152292255	0.0402637071627868	-0.0745697	-0.0528713	0.172322720494178	-0.0220153	0.19390228470392	-0.0740806	0.148596375780005	0.0469763410601913
1401	KWMTBOMO09183	CellTypeAll-M8	blue	0.274330252553181	0.147843481756851	0.312466828731198	-0.0597984	-0.069968	0.166382142968559	-0.158286	-0.20509	0.385453980200275	0.114099194902107	0.276852534238068	0.220696115196318	0.204976861973671
1402	KWMTBOMO09204	CellTypeAll-M2	turquoise	0.226339050111109	0.187565755897407	0.269822535345125	0.0509939269554029	0.0922288887379456	0.290717690274104	-0.0499214	-0.10332	0.114476155772009	-0.10008	0.103965789585001	-0.0464473	-0.0606755
1403	KWMTBOMO09205	CellTypeAll-M12	black	0.0310014540824798	-0.00801633	0.0277438445075444	-0.252245	-0.339126	-0.22911	-0.132553	-0.196901	0.388381963196593	0.399133947972618	0.336795077757011	0.485582356619176	0.685077842449008
1404	KWMTBOMO09207	CellTypeAll-M11	magenta	0.073858571073303	-0.0650894	2.46677005138354e-05	-0.0222925	-0.122932	-0.13646	-0.101723	0.0035239887653778	0.199168106702298	0.334348805885114	0.124238995623685	0.390201106773148	0.305030309334254
1405	KWMTBOMO09208	CellTypeAll-M2	turquoise	0.271652493286345	0.208650330457435	0.362550217700605	-0.0227107	0.0260672262862345	0.322777499467355	-0.0998503	-0.192236	0.246853584171997	-0.0865096	0.184523843142842	0.00683936356374139	-0.0138931
1406	KWMTBOMO09211	CellTypeAll-M7	green	0.0561592145439354	-0.0322782	-0.0202673	0.0781849374887775	-0.00614306	-0.0525681	-0.0405786	0.098432750469688	0.00719516936260625	0.165394927831724	-0.0153593	0.144090732026391	0.0938266193446381
1407	KWMTBOMO09213	CellTypeAll-M2	turquoise	0.216482688144285	0.185227356425123	0.285801857300195	-0.021687	0.0144355414474122	0.251444485425269	-0.0713169	-0.148142	0.185687099523077	-0.0706884	0.157047341376411	0.00177683200811581	0.002341048313872
1408	KWMTBOMO09215	CellTypeAll-M6	yellow	-0.147426	-0.13797	-0.155521	-0.018463	0.224428520671974	-0.0704803	0.59058912647679	0.177222427636277	-0.201325	-0.167082	-0.201004	-0.204298	-0.144519
1409	KWMTBOMO09225	CellTypeAll-M4	tan	0.0586369129017482	-0.186816	-0.0646634	0.424356516810533	0.501849117356615	0.0525251791860449	0.231879250824546	0.371018910765014	-0.250116	0.0103986964171589	-0.331069	-0.0827385	-0.251788
1410	KWMTBOMO09230	CellTypeAll-M12	black	0.0274539223161274	0.0800067918820973	0.0235721168478099	-0.277803	-0.372948	-0.208011	-0.117962	-0.204833	0.353622932359913	0.39407521367476	0.364347189194888	0.47441941528108	0.705110287653404
1411	KWMTBOMO09231	CellTypeAll-M12	black	0.0979339506154534	0.0148621315252844	0.0550922038487314	-0.0475358	-0.116121	-0.0612492	-0.1034	-0.0478135	0.20438275099281	0.244391306367024	0.156090610717784	0.286292160541628	0.269217582207985
1412	KWMTBOMO09232	CellTypeAll-M12	black	0.155770725946351	0.0762980880207399	0.175151729091251	-0.268434	-0.351225	-0.10346	-0.189956	-0.27896	0.49691476908815	0.348344073870041	0.410518833151206	0.472868548249637	0.647231645938811
1413	KWMTBOMO09235	CellTypeAll-M2	turquoise	0.327983086697295	0.205461195839627	0.340061882709518	0.0559573976609249	0.0753029010771964	0.292478838921305	-0.052173	-0.109866	0.209148684980736	-0.0368251	0.161283465747211	0.0376477248221497	0.00844169421600975
1414	KWMTBOMO09236	CellTypeAll-M9	pink	0.111805577377535	-0.127865	-0.0723259	0.246918447097443	0.0117930705451543	-0.161016	-0.16268	0.255500160966803	0.0221013002995673	0.470078785968959	-0.0489174	0.378260273412383	0.225383109427916
1415	KWMTBOMO09249	CellTypeAll-M7	green	0.0530591440488378	-0.0809899	-0.0461452	0.198688213867315	0.10689577366836	-0.0377793	-0.0228716	0.203314747470458	-0.0906416	0.112051093687536	-0.130781	0.051085578221831	-0.0411169
1416	KWMTBOMO09259	CellTypeAll-M8	blue	0.17460426500777	0.200367478800413	0.389333455158644	-0.484827	-0.400469	0.144214188917357	-0.315978	-0.758197	0.796439248481744	0.0357738554629325	0.688597027625434	0.301429535431897	0.476580779176468
1417	KWMTBOMO09271	CellTypeAll-M3	red	0.0648722544520218	-0.0798442	-0.076312	0.230500494482272	0.113251575300547	-0.0756413	0.100610898446236	0.270410267232512	-0.115966	0.198708421537238	-0.129372	0.119001776332176	0.0413162781447271
1418	KWMTBOMO09272	CellTypeAll-M2	turquoise	0.274443789038723	0.204119161781457	0.306238168625196	0.0351847434708085	0.0870057467559651	0.295124913820404	-0.025738	-0.12337	0.1595600177558	-0.0847633	0.140034356522159	-0.0168276	-0.026495
1419	KWMTBOMO09273	CellTypeAll-M8	blue	0.28806713108585	0.135280596964088	0.308678626610115	-0.0755064	-0.0791552	0.163768066713964	-0.129219	-0.186109	0.37807531825555	0.10896148238467	0.255475027886008	0.213044998501321	0.179527425411956
1420	KWMTBOMO09274	CellTypeAll-M7	green	0.107498732939502	-0.0804311	-0.0271023	0.278430585889588	0.144908452056521	-0.0207035	-0.0663162	0.273139463230676	-0.0927077	0.196840915028076	-0.147183	0.115491535371485	-0.0333538
1421	KWMTBOMO09275	CellTypeAll-M9	pink	0.0235337285248746	-0.114211	-0.0897429	0.0509092994313982	-0.0519198	-0.185579	0.0241175794739009	0.129770605217405	0.0682350326585053	0.373345825159248	0.0192773681293244	0.330550307203146	0.296593494548124
1422	KWMTBOMO09279	CellTypeAll-M4	tan	0.175771281046052	0.0137342965491517	0.113953430513804	0.287355692118478	0.335625907462671	0.210104771823008	0.0074113050426183	0.110985631959734	-0.0774559	-0.0541018	-0.102624	-0.0686026	-0.167549
1423	KWMTBOMO09282	CellTypeAll-M5	brown	0.155227086857914	0.0277990095849584	0.123335365931457	0.227279629186176	0.295526544188545	0.230587026610358	0.0812284834797351	0.0753173026877914	-0.0666804	-0.102204	-0.0819872	-0.105474	-0.165071
1424	KWMTBOMO09285	CellTypeAll-M2	turquoise	0.192823128932622	0.196916322570927	0.298557371629283	-0.109905	-0.0540831	0.264264511674057	-0.072756	-0.22492	0.236160935126927	-0.098133	0.190221772087596	-0.00776842	0.00416245883534067
1425	KWMTBOMO09287	CellTypeAll-M5	brown	0.222672780707436	0.103829329523311	0.210884998991629	0.207902134986453	0.260151889404481	0.284208447457336	0.028204557053381	0.0327480218644741	0.0120659114351676	-0.0892301	-0.0107927	-0.0690492	-0.128425
1426	KWMTBOMO09289	CellTypeAll-M2	turquoise	0.244340479075901	0.174384608581531	0.271566987005091	0.0302175818847142	0.0354965100926693	0.228847937606625	-0.0830058	-0.101995	0.179986926124307	-0.0142448	0.148118638453161	0.0467878787751034	0.0292815760181732
1427	KWMTBOMO09300	CellTypeAll-M12	black	0.0993423093592457	-0.0221662	0.126152636604585	-0.23423	-0.283387	-0.165193	-0.115281	-0.231194	0.49443435118306	0.376677697055966	0.350589452198423	0.495704524992538	0.663111373934945
1428	KWMTBOMO09301	CellTypeAll-M2	turquoise	0.188652557422509	0.113006775557312	0.210654310958013	0.0328585600721768	0.0506993546837463	0.18319176399768	-0.0412972	-0.0706445	0.128200929833381	-0.0355247	0.090870652755081	0.0108686427983829	-0.00763048
1429	KWMTBOMO09304	CellTypeAll-M2	turquoise	0.247353497111674	0.197289846955414	0.314301134766353	-0.0289862	0.0159543593273289	0.300891289466174	-0.0731287	-0.182171	0.207641314137025	-0.0880156	0.168533649319568	-0.0101087	-0.0306555
1430	KWMTBOMO09308	CellTypeAll-M8	blue	0.194858125589016	0.127930496679483	0.235624552103024	-0.0819314	-0.0724793	0.135289251817908	-0.0967351	-0.163647	0.278822717624508	0.0499121822491867	0.197263479062814	0.130065476160075	0.121070044092531
1431	KWMTBOMO09314	CellTypeAll-M8	blue	0.198178224131025	0.08765993340422	0.199846821391743	-0.0276878	-0.0454346	0.0938700788861388	-0.0879327	-0.0952077	0.237288932243677	0.0882368281907464	0.155110759081852	0.147612911009476	0.11999130427308
1432	KWMTBOMO09342	CellTypeAll-M10	purple	0.3070478455449	0.616990317479992	0.495950864683175	-0.444251	-0.42915	0.386768869422226	-0.348495	-0.751248	0.580865609068324	-0.0798004	0.780060145692566	0.184409708335719	0.468502620315221
1433	KWMTBOMO09346	CellTypeAll-M3	red	0.0727260542203815	-0.0741753	-0.0234394	0.281293831509238	0.148842550834451	0.0314113372144146	-0.0526183	0.169722549178781	-0.117167	0.0437138897293192	-0.111232	-0.00115233	-0.0710831
1434	KWMTBOMO09357	CellTypeAll-M5	brown	0.169601829103052	0.323958166391712	0.204799745211864	0.0397092042660828	0.0848697535452446	0.326771658571784	-0.0406037	-0.0964459	-0.0153998	-0.155055	0.110473310533809	-0.121949	-0.0661316
1435	KWMTBOMO09360	CellTypeAll-M12	black	0.101800801167702	0.0344034804892183	0.115062195856768	-0.244497	-0.302536	-0.135814	-0.11964	-0.272364	0.459531820200457	0.364772788118621	0.397347869248061	0.489907062534935	0.681320252681156
1436	KWMTBOMO09361	CellTypeAll-M2	turquoise	0.246601641615856	0.179388878882947	0.267011722307208	-0.0280684	-0.0348338	0.176677723627239	-0.0755995	-0.140031	0.241669778733922	0.0293777426211609	0.218043908005185	0.0975936406697014	0.117131329301049
1437	KWMTBOMO09374	CellTypeAll-M7	green	-0.00905664	-0.0962571	-0.0582256	0.0275911311840334	0.0117783641893534	-0.0897808	0.0686460903387875	0.105375527354052	-0.000685383	0.110850779221724	-0.052693	0.0783743873427626	0.0423956355079785
1438	KWMTBOMO09391	CellTypeAll-M9	pink	0.0512263298364365	-0.0840505	-0.0533148	0.0606100431796358	-0.0621306	-0.148205	-0.0916867	0.122220559036053	0.0783650391248553	0.338429571387393	0.0172822670590061	0.29535886643473	0.217807461227755
1439	KWMTBOMO09404	CellTypeAll-M6	yellow	-0.129217	-0.131089	-0.147401	-0.00375734	0.11669661878119	-0.10886	0.517361074648357	0.163751047299372	-0.180147	-0.0852698	-0.169303	-0.138114	-0.0392197
1440	KWMTBOMO09407	CellTypeAll-M6	yellow	-0.123659	-0.121045	-0.111555	-0.110847	0.191676027517732	-0.0292607	0.697330905713457	0.0594411773977331	-0.158733	-0.236164	-0.187352	-0.235355	-0.133414
1441	KWMTBOMO09408	CellTypeAll-M5	brown	0.325490528583561	0.544008138357195	0.491171222903154	-0.148514	-0.00845546	0.579732962850648	-0.0556105	-0.370647	0.234886697650315	-0.297467	0.336785092671539	-0.158486	-0.0313161
1442	KWMTBOMO09411	CellTypeAll-M2	turquoise	0.212784790903733	0.106432330492969	0.222933127654667	0.0276517376659489	0.0220888586710471	0.144504621848926	-0.0782694	-0.0697102	0.180201984273674	0.0324257248127539	0.118862192340941	0.0847672065706199	0.0587714033190565
1443	KWMTBOMO09415	CellTypeAll-M11	magenta	0.101500528852068	-0.0642909	0.0250288107543986	0.00188865682385156	-0.131201	-0.137729	-0.211503	-0.0168659	0.26920442439536	0.402239305719718	0.172323167843869	0.458056710454803	0.333826753889697
1444	KWMTBOMO09416	CellTypeAll-M9	pink	0.0490186933156045	-0.118401	-0.0761774	0.196503964038972	0.0370477390061242	-0.128165	-0.0906602	0.20252150127599	-0.00754141	0.322731290148442	-0.0689401	0.245106445001441	0.104646855779155
1445	KWMTBOMO09417	CellTypeAll-M7	green	-0.0219332	-0.163985	-0.165125	0.247791151851673	0.0788965579093203	-0.168621	-0.0627716	0.358783398146075	-0.167259	0.27248443396115	-0.22896	0.138283079032336	-0.0301294
1446	KWMTBOMO09425	CellTypeAll-M8	blue	0.162830659446441	0.0789852170518635	0.186461413277857	-0.0698249	-0.0617976	0.0861936016837057	-0.0733458	-0.125074	0.242911861634136	0.0598766189769105	0.164696191918005	0.126857053290565	0.111895323412389
1447	KWMTBOMO09428	CellTypeAll-M5	brown	0.143944743138566	0.169221666521619	0.177986820397111	-0.00626088	0.023602993731905	0.212646092418732	-0.0397902	-0.102445	0.0738079904359321	-0.080232	0.11444332469556	-0.0416468	-0.0304628
1448	KWMTBOMO09433	CellTypeAll-M2	turquoise	0.247468787613014	0.201181776760674	0.323069649396551	-0.0110406	0.0457828162388929	0.307597434733622	-0.0588929	-0.168137	0.192319946753794	-0.0989544	0.154734718337738	-0.0216532	-0.0308331
1449	KWMTBOMO09442	CellTypeAll-M12	black	0.110248751790235	-0.0287508	0.0916226035435043	-0.104552	-0.23955	-0.146476	-0.222225	-0.137181	0.399335843117134	0.413753231508418	0.289134639446835	0.487784699932987	0.589172309713386
1450	KWMTBOMO09443	CellTypeAll-M6	yellow	0.0567544101491391	0.0276046520004741	0.0441611783933736	0.0692268007711701	0.16843168948598	0.117724101426295	0.14685444973995	0.027854372164945	-0.0505967	-0.0829718	-0.0415956	-0.0847411	-0.091641
1451	KWMTBOMO09451	CellTypeAll-M8	blue	0.196020604471968	0.0561505002964114	0.179460041607503	0.0339542220168585	0.00180394447902974	0.089385903790677	-0.104858	-0.069548	0.218842219734062	0.121326406833834	0.138312366516362	0.174375557625293	0.113776480919035
1452	KWMTBOMO09472	CellTypeAll-M5	brown	0.321885358880513	0.304200501168458	0.382894609677774	0.0431152053602999	0.147976897251963	0.447411935697176	-0.0071883	-0.165568	0.161701983618375	-0.176019	0.162014214482542	-0.0878502	-0.0755649
1453	KWMTBOMO09477	CellTypeAll-M2	turquoise	0.191084872195041	0.206292495100001	0.263018205612098	-0.0253079	0.0242041398697057	0.263249851265948	-0.0494466	-0.14596	0.147281839915241	-0.0964409	0.14036769026773	-0.0336127	-0.013455
1454	KWMTBOMO09480	CellTypeAll-M2	turquoise	0.117871671199561	0.189418275700684	0.180638370305576	-0.0500305	0.010102947058361	0.203156244506306	-0.00261473	-0.116605	0.0808612595006255	-0.0968256	0.111526772277656	-0.0515245	-0.0108662
1455	KWMTBOMO09492	CellTypeAll-M5	brown	0.23553874329102	0.231727439871117	0.279408903155805	0.0206954316412996	0.0810434129986723	0.331416441703517	-0.014949	-0.137232	0.122193250570898	-0.121337	0.146152738546161	-0.0570964	-0.0415522
1456	KWMTBOMO09495	CellTypeAll-M2	turquoise	0.190201987017348	0.168292836253908	0.263064315034827	-0.0722704	-0.0384842	0.197455342651884	-0.0781358	-0.174084	0.235419292385911	-0.0237146	0.185109819281859	0.0588251013284105	0.0708278132285247
1457	KWMTBOMO09496	CellTypeAll-M8	blue	0.180470859186909	0.0894760087278229	0.211172588791638	-0.0806849	-0.0767984	0.101078407657666	-0.107882	-0.163933	0.298634420766579	0.095212449539766	0.211692291605851	0.174318946409366	0.156084666824581
1458	KWMTBOMO09500	CellTypeAll-M6	yellow	-0.101073	-0.121989	-0.0831151	0.00165849817651821	0.341880470629006	0.0359722472846836	0.649553252530369	0.122940613317809	-0.18856	-0.249594	-0.209771	-0.264628	-0.200788
1459	KWMTBOMO09527	CellTypeAll-M2	turquoise	0.321279799068024	0.237197166025652	0.386591534875531	0.00959916316906331	0.107164869178075	0.371318611585469	0.0117259358867135	-0.180338	0.224035914009447	-0.126032	0.176912808907594	-0.028983	-0.0306525
1460	KWMTBOMO09528	CellTypeAll-M5	brown	0.196191585060793	0.226391808474872	0.215990542867929	0.0393773560401217	0.0843125474934384	0.290837478092375	-0.0147854	-0.0919611	0.0450747562996382	-0.111593	0.111151331617388	-0.0724811	-0.0578455
1461	KWMTBOMO09530	CellTypeAll-M2	turquoise	0.322357375538139	0.201147095301618	0.33561877248707	0.0732098125604451	0.103644511368187	0.295733703533606	-0.0439313	-0.0964233	0.187921071066607	-0.0562682	0.148706202682148	0.0150829358284879	0.00438760901096013
1462	KWMTBOMO09534	CellTypeAll-M2	turquoise	0.275662162916372	0.253643158452397	0.368928304295058	-0.0984657	0.0146331625428591	0.35773502836794	3.01058398181448e-06	-0.271921	0.270068713005065	-0.142454	0.247217478513465	-0.0268198	-0.00532471
1463	KWMTBOMO09535	CellTypeAll-M5	brown	0.219593318729292	0.360876328278495	0.317785181158915	-0.0852531	0.0645539486224637	0.445397210926934	0.0518853213772295	-0.242398	0.103068296182709	-0.262152	0.196387949077443	-0.17463	-0.115456
1464	KWMTBOMO09538	CellTypeAll-M1	greenyellow	0.231484949707468	0.290758505010761	0.282063068995622	0.00771128193790305	0.0422643265432919	0.317686366087595	-0.0739024	-0.142825	0.113813235003161	-0.114485	0.166780800357405	-0.0554576	-0.018726
1465	KWMTBOMO09541	CellTypeAll-M6	yellow	-0.170054	-0.14707	-0.16055	-0.103089	0.144818679775706	-0.105591	0.708109733068035	0.122987606097081	-0.193673	-0.172184	-0.195007	-0.205104	-0.0727573
1466	KWMTBOMO09542	CellTypeAll-M2	turquoise	0.303756121825159	0.205987057172536	0.364920275629594	-0.0246077	0.00717601587557003	0.267492418383138	-0.0786327	-0.200527	0.328833551134547	0.0157352482676695	0.260705528403569	0.123599788928591	0.135868586707125
1467	KWMTBOMO09544	CellTypeAll-M10	purple	0.208097895050823	0.401876897077418	0.329160251551288	-0.157285	-0.129942	0.260583776875811	-0.125213	-0.24796	0.228225809090629	-0.108639	0.359765692082798	-0.00127472	0.183559979162097
1468	KWMTBOMO09545	CellTypeAll-M2	turquoise	0.193654965769399	0.147087490409472	0.286791847883097	-0.111209	-0.0629743	0.21061617293625	-0.0816756	-0.222388	0.289622946594241	-0.0567651	0.219452916975334	0.0369502286696114	0.0481513484554415
1469	KWMTBOMO09551	CellTypeAll-M5	brown	0.163583562554381	0.287395837530456	0.207746701066051	-0.0358777	-0.00413307	0.284615639484233	-0.0708945	-0.134025	0.0532358683147836	-0.124713	0.148677739900751	-0.0868824	-0.0601931
1470	KWMTBOMO09553	CellTypeAll-M3	red	0.166295578446928	-0.0202932	-0.00976923	0.403366887238777	0.193226513178274	0.0337283153915293	-0.09564	0.317488432038368	-0.147103	0.235993655690258	-0.146933	0.136944584991328	-0.034606
1471	KWMTBOMO09556	CellTypeAll-M5	brown	0.165230325453591	0.262065927477679	0.17208239744939	0.0364096724892682	0.0637313719858984	0.280555836964078	-0.0365854	-0.0847696	-0.018132	-0.122548	0.106881877622335	-0.100242	-0.0757892
1472	KWMTBOMO09561	CellTypeAll-M6	yellow	-0.188271	-0.224095	-0.237498	0.00830486423744217	0.196588353260235	-0.179736	0.683157010467679	0.299805096711257	-0.270031	-0.0779757	-0.298952	-0.165865	-0.113991
1473	KWMTBOMO09585	CellTypeAll-M3	red	0.0394071870432334	-0.141584	-0.0891796	0.302605225012209	0.150280066502374	-0.0904997	-0.0581896	0.310468628655641	-0.126589	0.220778473325619	-0.198106	0.13847573725655	-0.0259538
1474	KWMTBOMO09593	CellTypeAll-M1	greenyellow	0.216753355956715	0.453269754440442	0.266403115432777	-0.144869	-0.126569	0.301648044699458	-0.103463	-0.249491	0.11573757634948	-0.128957	0.305490219769476	-0.0516463	0.0612819408460309
1475	KWMTBOMO09597	CellTypeAll-M1	greenyellow	0.126867219572731	0.630171592445696	0.156489081029166	-0.118536	-0.178841	0.353828298871718	-0.174486	-0.232838	-0.132867	-0.231148	0.296790712864656	-0.203044	-0.0330249
1476	KWMTBOMO09598	CellTypeAll-M11	magenta	0.0757840458959923	-0.0498158	-0.000480503	0.0216849142708241	-0.0725982	-0.100692	-0.07257	0.0339556765179931	0.138369002078773	0.275676750687968	0.0806028482134818	0.307150069245977	0.233236814537779
1477	KWMTBOMO09601	CellTypeAll-M3	red	0.138120585805178	-0.022324	0.0797515093036168	0.246861062230609	0.179682841294398	0.120182462533297	-0.0476964	0.0880286835542201	-0.0141955	0.00656667085770145	-0.0643598	-0.000803507	-0.0854596
1478	KWMTBOMO09606	CellTypeAll-M2	turquoise	0.21917509715867	0.186825496265551	0.266224173629728	0.0272767170968525	0.07599843936468	0.292499148762348	-0.0429015	-0.125358	0.119665055469208	-0.107229	0.117360537407692	-0.0498392	-0.0676418
1479	KWMTBOMO09614	CellTypeAll-M6	yellow	-0.2749	-0.224404	-0.262864	-0.0999116	0.224270659783219	-0.178629	0.850649613459727	0.234101931358726	-0.307887	-0.233642	-0.304703	-0.2979	-0.160452
1480	KWMTBOMO09621	CellTypeAll-M2	turquoise	0.235406829425364	0.165806223948764	0.251989192435444	0.00206250318456091	-0.0127748	0.163042585182709	-0.0922331	-0.133882	0.260079446029196	0.0873728877627788	0.216502229294857	0.169253764963593	0.174635942441142
1481	KWMTBOMO09623	CellTypeAll-M2	turquoise	0.171279268065687	0.11474900564761	0.190714954000385	-0.0220873	-0.0305017	0.109058587026528	-0.0734216	-0.0955841	0.187555073221484	0.0419915795110915	0.141957654183737	0.0973603503842234	0.0899164637700355
1482	KWMTBOMO09631	CellTypeAll-M12	black	0.127655371970338	0.0710340573318004	0.0522591331692611	-0.0201883	-0.168255	-0.107578	-0.127085	-0.000896584	0.219575572362815	0.365501681289847	0.219518256458898	0.383837915818494	0.42876386812267
1483	KWMTBOMO09649	CellTypeAll-M3	red	0.0865030361493369	-0.119133	-0.0522864	0.345108753523498	0.145714279179215	-0.0331143	-0.0545209	0.261087785263474	-0.120238	0.16373224689552	-0.168264	0.0988259749568998	-0.0162465
1484	KWMTBOMO09656	CellTypeAll-M2	turquoise	0.163620163665866	0.0996982305433878	0.180709182613694	0.00927849649310903	0.00551169936672364	0.126015888306703	-0.0717036	-0.0754357	0.152072095875838	0.023080429911869	0.112762177333619	0.0671866145620498	0.0454740784852248
1485	KWMTBOMO09663	CellTypeAll-M11	magenta	0.0999922299817244	-0.0282525	0.0391684455148523	0.0259237708584086	-0.0576678	-0.0572673	-0.100652	0.0175045725283208	0.14897196836798	0.237104904710993	0.08442467515704	0.265991468874108	0.171144795336701
1486	KWMTBOMO09666	CellTypeAll-M8	blue	0.0434742952323871	0.0430394843534748	0.0864016537519458	-0.161361	-0.153491	-0.0195387	-0.123265	-0.241182	0.304461988652676	0.0964314742520454	0.255548392007853	0.167634699817886	0.232857804167887
1487	KWMTBOMO09667	CellTypeAll-M8	blue	0.0115498203608522	-0.000169763	0.067891266331782	-0.19138	-0.176227	-0.0554814	-0.147392	-0.292562	0.348647927837063	0.107519443416889	0.299317298215804	0.189906048681863	0.263306133879113
1488	KWMTBOMO09672	CellTypeAll-M2	turquoise	0.38774533949412	0.4587721622472	0.540676686607908	-0.155254	-0.0736281	0.467880718675896	-0.145753	-0.398755	0.420040749492574	-0.124771	0.421384426558182	0.0451893972620061	0.140744879573762
1489	KWMTBOMO09674	CellTypeAll-M9	pink	0.0133755336105801	-0.13031	-0.105471	0.154780253425711	0.0137597071190637	-0.147643	-0.0453057	0.217473521133256	-0.0415615	0.298010217503983	-0.100413	0.219504883226791	0.112444696514763
1490	KWMTBOMO09683	CellTypeAll-M5	brown	0.264858251029039	0.310434498412012	0.285194562925221	0.096936586305488	0.119802789512906	0.370027555949573	-0.0564699	-0.0862567	0.0504367572990313	-0.120662	0.12535609979477	-0.0734082	-0.060333
1491	KWMTBOMO09689	CellTypeAll-M8	blue	0.207202964915833	0.125982869443457	0.204508726857584	-0.0322707	-0.0619594	0.0981380428196694	-0.0895355	-0.111203	0.257429410620503	0.135077885837844	0.195717698524805	0.205585789218856	0.198599640884973
1492	KWMTBOMO09705	CellTypeAll-M10	purple	0.202586974820999	0.214836954263433	0.266176250658355	-0.15322	-0.138498	0.182142514261452	-0.152167	-0.300098	0.331665480614373	0.0283651770791456	0.37972909945194	0.134494406290542	0.183370361714416
1493	KWMTBOMO09707	CellTypeAll-M3	red	0.150600186073759	-0.0768705	-0.0136786	0.416544666671382	0.17329716749386	0.0087324372730982	-0.108009	0.29050585567105	-0.116237	0.201822667864875	-0.144908	0.120190225861448	-0.0435702
1494	KWMTBOMO09709	CellTypeAll-M1	greenyellow	0.252987256443427	0.506521202620348	0.342046104286309	-0.142627	-0.127632	0.368976082929222	-0.140271	-0.280464	0.156401029511486	-0.154946	0.340021539072255	-0.0643648	0.0489424160418376
1495	KWMTBOMO09712	CellTypeAll-M7	green	-0.163355	-0.463396	-0.407286	0.500673273816449	0.449335042620321	-0.296952	0.458487493756034	0.778786336954977	-0.551789	0.162226170019412	-0.666392	-0.0837763	-0.282808
1496	KWMTBOMO09714	CellTypeAll-M6	yellow	0.0234594487626217	-0.200385	-0.0914301	0.36371594072819	0.513023201414648	0.0556885640924197	0.442334650513457	0.331117348386483	-0.288731	-0.0977765	-0.342705	-0.175956	-0.261684
1497	KWMTBOMO09715	CellTypeAll-M2	turquoise	0.196689732582636	0.131246190550036	0.239732079574908	-0.0589053	-0.0401791	0.161327481490722	-0.0628232	-0.138595	0.224003978215606	0.00358673687737511	0.165449438736199	0.0723075388571402	0.0657758346407904
1498	KWMTBOMO09716	CellTypeAll-M2	turquoise	0.250249598307044	0.167611171288745	0.305602525916756	-0.0420317	-0.0178811	0.228282861687431	-0.0887046	-0.169183	0.258333353942343	-0.0157694	0.192031088373126	0.0716647715843171	0.0529586489453173
1499	KWMTBOMO09746	CellTypeAll-M8	blue	0.212946616878451	0.130323504702606	0.241709319893984	-0.0793697	-0.0775255	0.124366441631233	-0.10689	-0.171657	0.307002722986291	0.0763212191857956	0.22050763743038	0.170781836877643	0.160739650907791
1500	KWMTBOMO09747	CellTypeAll-M5	brown	0.220637400247267	0.258116712609503	0.236115818469165	0.0690633390174705	0.0824726310614464	0.295179130182005	-0.0443008	-0.0805663	0.0636665318340015	-0.0803218	0.123586109546993	-0.0429481	-0.0282408
1501	KWMTBOMO09752	CellTypeAll-M2	turquoise	0.189612895450501	0.126761388143178	0.189453397038204	0.0482509922769212	0.0371629105286747	0.156574331319042	-0.0492766	-0.0488096	0.122539607066572	0.0152282184150148	0.0992665971684314	0.0546427119862192	0.0404851417532099
1502	KWMTBOMO09755	CellTypeAll-M9	pink	0.10637444531687	-0.104405	-0.0365211	0.258163968152633	0.0752083996916797	-0.0831358	-0.127133	0.22324398979343	-0.00212046	0.312846843946768	-0.0646988	0.241175011490916	0.0877279551678655
1503	KWMTBOMO09762	CellTypeAll-M1	greenyellow	0.135081611600176	0.580039235958811	0.181292063772985	-0.188286	-0.195496	0.331956110457161	-0.130859	-0.271396	-0.0505025	-0.208002	0.335802979123885	-0.159882	0.0154426415805974
1504	KWMTBOMO09775	CellTypeAll-M2	turquoise	0.158851990741695	0.0952630163906893	0.175408507657194	0.0278495776493489	0.0538894499831118	0.161629368315242	-0.00245732	-0.0599868	0.106226627781295	-0.0281332	0.0748620568219584	0.0091156713947207	-0.00712559
1505	KWMTBOMO09777	CellTypeAll-M3	red	0.152258976820752	-0.0599036	0.0481018066349346	0.339530679031753	0.257615729125542	0.104229085211433	-0.0147408	0.178648955644798	-0.092192	0.0316107788155497	-0.135035	-0.00431773	-0.112659
1506	KWMTBOMO09778	CellTypeAll-M4	tan	0.167875700842949	-0.0302436	0.0915204559144003	0.38025252936177	0.411606974402947	0.218955089502805	-0.00984096	0.162979418223718	-0.126753	-0.0714122	-0.163564	-0.0983908	-0.214455
1507	KWMTBOMO09779	CellTypeAll-M3	red	0.137220802975257	-0.138434	-0.00766598	0.466965916951163	0.311274354824536	0.0872618480935475	-0.050865	0.263818067843407	-0.168692	0.0368621545551762	-0.222258	-0.0218434	-0.170142
1508	KWMTBOMO09785	CellTypeAll-M3	red	0.084107279737708	-0.0814954	-0.00636462	0.293455411194577	0.23823853417927	0.0445917831209281	0.00587348961058184	0.194600869561118	-0.109406	0.0572947249013687	-0.14859	0.00937495855490258	-0.0998946
1509	KWMTBOMO09787	CellTypeAll-M2	turquoise	0.184934701052096	0.33492123574615	0.273489793544781	-0.0960909	-0.0204408	0.310981492220082	-0.0191106	-0.187078	0.116672247624004	-0.14604	0.193256342523626	-0.073573	0.00645126736734607
1510	KWMTBOMO09788	CellTypeAll-M8	blue	0.184044106441498	0.0706079225676249	0.241914446585168	-0.252304	-0.293062	-0.0164455	-0.289894	-0.397889	0.610675325670656	0.317857935080817	0.493650652496821	0.48485805649282	0.520714419071432
1511	KWMTBOMO09796	CellTypeAll-M8	blue	0.338588839689534	0.184053832712792	0.387136171675218	-0.091241	-0.0859465	0.22002846717235	-0.166588	-0.264042	0.461750837137163	0.0922899107027759	0.327974315740166	0.23175186243125	0.209894350260764
1512	KWMTBOMO09808	CellTypeAll-M11	magenta	0.140671366708019	-0.041122	0.0755047877995418	0.0550463146533082	-0.040889	-0.0461713	-0.141573	0.0154833523918766	0.207600546875918	0.286262395175504	0.107109501198938	0.328595764853947	0.192135684646017
1513	KWMTBOMO09810	CellTypeAll-M5	brown	0.22572897645461	0.175456711464051	0.247506947287642	0.064559777379364	0.097203247354646	0.275755232835841	-0.0400083	-0.0872153	0.111989288597914	-0.0788733	0.106981396537275	-0.028392	-0.0451781
1514	KWMTBOMO09811	CellTypeAll-M5	brown	0.354629338125769	0.248677779737791	0.365718268527873	0.132009039269497	0.213362641418661	0.42264205498622	0.0298220044608297	-0.102618	0.130002693978093	-0.147037	0.108781422875737	-0.0735598	-0.0988471
1515	KWMTBOMO09812	CellTypeAll-M3	red	0.0884637927553098	-0.18601	-0.088626	0.553139979135313	0.493340942324055	0.0535126432384654	0.190689877045741	0.423830548487442	-0.318751	0.0457275765325174	-0.353484	-0.0671894	-0.238281
1516	KWMTBOMO09815	CellTypeAll-M8	blue	0.0878542447556601	0.014623727821535	0.0966139058293047	-0.146541	-0.154025	-0.0352585	-0.10788	-0.166701	0.295706095056655	0.172970466620644	0.223737839165209	0.250139308945148	0.238809569809863
1517	KWMTBOMO09829	CellTypeAll-M2	turquoise	0.22189349788206	0.208827172423475	0.257561051389665	-0.00532174	0.0322302071414108	0.251170400481176	-0.0352556	-0.126832	0.132879530223604	-0.0733331	0.149848997063886	-0.0146828	-0.00477264
1518	KWMTBOMO09832	CellTypeAll-M10	purple	0.243842167238631	0.365967482626503	0.415443502475533	-0.323922	-0.28233	0.21772718138031	-0.243554	-0.504953	0.557635971891481	-0.00250404	0.617028702140335	0.199343727031914	0.390796057920779
1519	KWMTBOMO09837	CellTypeAll-M2	turquoise	0.165188516379677	0.156610719337291	0.2090222107421	-0.0501733	-0.0207611	0.165247799645286	-0.0332077	-0.126963	0.164592906727751	-0.0264148	0.163588949843051	0.0338995618904379	0.0603647389147802
1520	KWMTBOMO09876	CellTypeAll-M12	black	0.0147294588408805	0.0847871809302622	0.0503240193303919	-0.383004	-0.427652	-0.207584	-0.0840279	-0.302304	0.424455620083468	0.346320110936485	0.429535297404106	0.462000483646316	0.732684226847068
1521	KWMTBOMO09886	CellTypeAll-M7	green	-0.0262304	-0.139081	-0.132352	0.166050146715472	0.0546601245787768	-0.138645	-0.0606252	0.300157117885383	-0.147135	0.187763548030638	-0.206955	0.0705380675151096	-0.0649461
1522	KWMTBOMO09892	CellTypeAll-M10	purple	0.122176534173203	0.116428870736092	0.161535799646644	-0.161225	-0.149818	0.0482474090114723	-0.111403	-0.250862	0.311722509730643	0.0868710979389162	0.329496953785429	0.190755406436989	0.251778104072058
1523	KWMTBOMO09903	CellTypeAll-M2	turquoise	0.189738868663478	0.144820618264333	0.203244882020165	-0.00257745	-0.000842732	0.1571188305538	-0.0479224	-0.0816094	0.143788380711567	-0.00819717	0.119175188392466	0.0412532285934128	0.0429166030553998
1524	KWMTBOMO09911	CellTypeAll-M2	turquoise	0.183652336232771	0.100656100398746	0.198449583564653	0.0282471314691078	0.0296138690284303	0.147536459090848	-0.0612195	-0.0701035	0.150780338992139	0.0133339676613637	0.104454186801287	0.0589056255486586	0.0353024962501912
1525	KWMTBOMO09918	CellTypeAll-M5	brown	0.22606484107084	0.401812765403262	0.300236343853467	-0.0282501	0.0737782707100658	0.432026035487307	0.0212058536265692	-0.190804	0.0571399091387418	-0.232977	0.186238815069368	-0.162275	-0.0812525
1526	KWMTBOMO09934	CellTypeAll-M7	green	0.0321497019342467	-0.133013	-0.109626	0.24372872716491	0.0698332693050819	-0.139743	-0.0864722	0.297896732125422	-0.0860929	0.304348710061096	-0.153964	0.216600597453921	0.0594432002854684
1527	KWMTBOMO09952	CellTypeAll-M7	green	-0.0541549	-0.318925	-0.293255	0.501389875368668	0.218738003468588	-0.278815	-0.132426	0.631522988251391	-0.340595	0.409036776513063	-0.450614	0.173129478377026	-0.133871
1528	KWMTBOMO09954	CellTypeAll-M2	turquoise	0.307033834095508	0.236435222000081	0.387567420206754	0.0038365455535255	0.0467794710867001	0.338707747482535	-0.10343	-0.185726	0.262190632962963	-0.0681128	0.206930378874503	0.0300421051365699	0.0157592168095042
1529	KWMTBOMO09960	CellTypeAll-M2	turquoise	0.326637381502922	0.304146562008901	0.436791138362778	-0.0408501	0.0371081495977788	0.414218016068132	-0.0909454	-0.259919	0.289698350744615	-0.128569	0.252152505186001	-0.00972173	0.00627042203475407
1530	KWMTBOMO09962	CellTypeAll-M5	brown	0.250002907314313	0.36446248707791	0.320997402848128	-0.00178492	0.0906927088947374	0.435916926251506	-0.0176452	-0.190002	0.0891160470241729	-0.200178	0.186067302362024	-0.126629	-0.0716697
1531	KWMTBOMO09969	CellTypeAll-M2	turquoise	0.208221397418521	0.187628663580836	0.292421847174463	-0.0259162	0.0289874603192209	0.283697793704196	-0.0620459	-0.159655	0.179301252434576	-0.100565	0.141516457259434	-0.0297143	-0.0340101
1532	KWMTBOMO09978	CellTypeAll-M8	blue	0.178420905404136	0.0895355759865102	0.18040589154971	-0.0229877	-0.0339817	0.0912314818991905	-0.0713101	-0.0845304	0.207465453089156	0.0794757472805084	0.142475353530617	0.134400181013774	0.108503477082947
1533	KWMTBOMO09979	CellTypeAll-M2	turquoise	0.220996068872931	0.174556211741086	0.257517694089402	0.0306982260752768	0.0498117203941425	0.230813007917576	-0.0694457	-0.0976722	0.142474898486816	-0.0482976	0.126969438596269	0.00678697914910428	-0.00163339
1534	KWMTBOMO09980	CellTypeAll-M2	turquoise	0.265648550637817	0.187739521886395	0.276131372665592	0.0588602786129567	0.0452773295879387	0.219237888687558	-0.0932417	-0.0921021	0.20263600402467	0.0447327690111367	0.162111961602435	0.109858797643306	0.098951393683127
1535	KWMTBOMO09983	CellTypeAll-M2	turquoise	0.187759662574035	0.108435316932123	0.204276607148952	0.0522812153014271	0.0614081040786979	0.165741051686524	-0.0529263	-0.0601583	0.122746284277665	-0.0149714	0.0857580118303322	0.0264649648021055	0.0020554603768966
1536	KWMTBOMO10002	CellTypeAll-M2	turquoise	0.206891579764414	0.14816401215489	0.250664006991646	-0.0683439	-0.0564952	0.163239699474879	-0.0837671	-0.156166	0.237167702589488	0.0195461579279888	0.188862087068605	0.0979146031436445	0.0901336398069734
1537	KWMTBOMO10003	CellTypeAll-M2	turquoise	0.186069997828675	0.202530533228569	0.248455810600636	0.00591773141510332	0.0478003161011392	0.266844729505635	-0.0596621	-0.123458	0.120614811872133	-0.0925954	0.115756175171854	-0.0363805	-0.0343922
1538	KWMTBOMO10007	CellTypeAll-M8	blue	0.0313907887507094	-0.000271252	0.138336855516323	-0.348092	-0.311142	-0.0741063	-0.241684	-0.518183	0.593769529036342	0.158185415336702	0.506354934168018	0.321562880177643	0.442804665939912
1539	KWMTBOMO10009	CellTypeAll-M8	blue	0.165669868717114	0.129149308295452	0.318094028417441	-0.367405	-0.309197	0.0932782521976353	-0.253189	-0.5803	0.671866372927357	0.0867162275083195	0.597039424889802	0.298638060286315	0.399237442222278
1540	KWMTBOMO10024	CellTypeAll-M11	magenta	0.067360491812308	-0.0381576	0.0132291782890475	-0.00335721	-0.066094	-0.0728985	-0.0596025	0.0143909326850897	0.132583808720988	0.214717308171896	0.0779049426692341	0.247080611216201	0.180531028556339
1541	KWMTBOMO10039	CellTypeAll-M2	turquoise	0.274971166554763	0.29800487910709	0.404254721299322	-0.124006	-0.0612387	0.33724227752839	-0.106218	-0.271152	0.305180695077873	-0.104788	0.265329945084392	0.0133050186159564	0.057488541336071
1542	KWMTBOMO10043	CellTypeAll-M12	black	0.086372487369227	0.0243029024078602	0.0529621809466695	-0.072321	-0.116693	-0.0574967	-0.0570088	-0.066711	0.195698852086834	0.216765778158756	0.163818885670279	0.263244619428021	0.278769656577345
1543	KWMTBOMO10049	CellTypeAll-M12	black	0.094169800623091	0.112552455335386	0.124911085492297	-0.317819	-0.316038	-0.0976388	-0.0127133	-0.298959	0.422967173734597	0.273583722347207	0.422201170954284	0.405636220629752	0.633491657690463
1544	KWMTBOMO10056	CellTypeAll-M2	turquoise	0.295787998964109	0.313354373341222	0.401549620121477	-0.0556942	0.00805074686613435	0.405041376959715	-0.115429	-0.261851	0.241996541516788	-0.145773	0.243082262294957	-0.0369916	-0.0178921
1545	KWMTBOMO10066	CellTypeAll-M6	yellow	-0.0411668	-0.0586023	-0.0289144	-0.0666113	0.200048095892159	0.068355999249434	0.49932210119261	-0.00687261	-0.0871475	-0.204229	-0.119676	-0.187783	-0.149377
1546	KWMTBOMO10074	CellTypeAll-M2	turquoise	0.174961322919811	0.09482575729703	0.18317244014842	0.0222025488884566	0.018794455945826	0.134343178458584	-0.0736355	-0.069079	0.152545012718834	0.0422577740356045	0.104414419902849	0.0888764817393179	0.0497764318239236
1547	KWMTBOMO10093	CellTypeAll-M3	red	0.102893598631546	-0.139672	-0.0490657	0.482836754153237	0.280178493277962	0.0460346147203012	-0.0815644	0.290812284128968	-0.189542	0.0760008319750042	-0.223517	0.00596459587992706	-0.141943
1548	KWMTBOMO10113	CellTypeAll-M2	turquoise	0.208984470065501	0.137528418688467	0.218251285739662	0.037682890631789	0.0395595324150048	0.190018738708158	-0.0573371	-0.0742027	0.132137563267347	-0.00922829	0.110785932213868	0.0381913695490048	0.0187533165856282
1549	KWMTBOMO10114	CellTypeAll-M9	pink	0.0808922797910327	-0.110604	-0.0407639	0.143324437308831	-0.0201727	-0.144935	-0.151069	0.152356038738286	0.0921263199100204	0.399034277746373	0.00509840802115788	0.343202351931867	0.212891741503158
1550	KWMTBOMO10127	CellTypeAll-M12	black	0.118311327124894	-0.0294596	0.061524679651311	-0.055895	-0.197743	-0.145626	-0.233973	-0.127454	0.37319648268824	0.417424137985733	0.303161691209713	0.477257569887915	0.473868416002827
1551	KWMTBOMO10128	CellTypeAll-M12	black	0.0361531289031427	-0.0532705	-0.062804	-0.0266892	-0.170113	-0.213338	-0.106303	0.0484869803227898	0.161137808848581	0.425334807180976	0.13605007911375	0.423945171959329	0.445580779578262
1552	KWMTBOMO10129	CellTypeAll-M9	pink	0.0716562944940735	-0.13823	-0.090457	0.21439399054066	0.0184863343608098	-0.156455	-0.100964	0.236657301187209	0.00037237034793157	0.390884318156002	-0.0662418	0.304155608589006	0.166023068851377
1553	KWMTBOMO10130	CellTypeAll-M2	turquoise	0.25580560142154	0.15987186291412	0.285397915701751	-0.0267315	-0.0124297	0.21161994434739	-0.0699064	-0.149995	0.250899551854823	0.0170318765048204	0.190513810031367	0.0962407790093986	0.0797592376857303
1554	KWMTBOMO10131	CellTypeAll-M5	brown	0.316413588639435	0.361404411849812	0.378343017192237	0.0307592468994474	0.0866025286755224	0.46043841689385	-0.0589985	-0.206224	0.152394869436662	-0.179781	0.215010451760953	-0.0942216	-0.0663849
1555	KWMTBOMO10133	CellTypeAll-M5	brown	0.196016830890624	0.193850469785341	0.251404131439879	0.0163632305172014	0.0886302311740408	0.307468462051812	-0.0223388	-0.125276	0.101449723723996	-0.130621	0.108351634111859	-0.0754629	-0.0780024
1556	KWMTBOMO10140	CellTypeAll-M8	blue	0.163665714491818	0.0786041653753975	0.178846444869271	-0.105985	-0.112977	0.0492425063539754	-0.104784	-0.152712	0.298679352540798	0.120764876086055	0.215226937798801	0.200241362531325	0.194715641031969
1557	KWMTBOMO10144	CellTypeAll-M8	blue	0.241354166536674	0.132750160589567	0.274348955020971	-0.110271	-0.105621	0.125906751185776	-0.126181	-0.215304	0.382411009952355	0.111702126094788	0.277404542694465	0.218674647906466	0.209849856158551
1558	KWMTBOMO10146	CellTypeAll-M8	blue	0.179072580772965	0.0915055835369524	0.193250787374259	-0.0651672	-0.0612872	0.0907251229975242	-0.0879248	-0.13635	0.263706486273146	0.0902801351250952	0.184693461079862	0.160690983123873	0.146709736153183
1559	KWMTBOMO10147	CellTypeAll-M8	blue	0.294241150632104	0.0356220968043551	0.253341854095934	0.0452675600086511	-0.011235	0.0941656804903561	-0.172435	-0.0609544	0.325773076033523	0.201538676893046	0.168815347312318	0.269833682116026	0.176518011364739
1560	KWMTBOMO10159	CellTypeAll-M2	turquoise	0.195738767612221	0.119704702123813	0.207475087710004	0.042766341652646	0.0552424424486562	0.18217875655904	-0.0593142	-0.068444	0.128621774477976	-0.00913635	0.0986567811028874	0.0356459177953046	0.00699990824627381
1561	KWMTBOMO10169	CellTypeAll-M8	blue	0.230094424169721	0.12472490965458	0.25898179039194	-0.0675158	-0.070428	0.129661989813877	-0.126463	-0.172245	0.325596398458764	0.101728258413687	0.23431067480478	0.191247791807242	0.170352833179135
1562	KWMTBOMO10175	CellTypeAll-M7	green	0.0273515957875249	-0.262827	-0.184161	0.377130895334111	0.114428849906829	-0.268903	-0.211952	0.455114845432985	-0.105034	0.4695202926381	-0.214122	0.330224653955754	0.11012572279101
1563	KWMTBOMO10176	CellTypeAll-M5	brown	0.309008968379174	0.232774775243866	0.335262795354778	0.0886366303546806	0.118093129996024	0.352115625000269	-0.0669439	-0.101503	0.16420406792629	-0.0594654	0.137460800473287	0.00261253850707738	-0.0253668
1564	KWMTBOMO10177	CellTypeAll-M2	turquoise	0.244046089098028	0.229453782268153	0.297144067685766	-0.0293807	0.0104348964481448	0.274584106606062	-0.0437147	-0.156123	0.17374626692109	-0.083867	0.173103045780712	-0.00932974	0.0036558251003293
1565	KWMTBOMO10184	CellTypeAll-M2	turquoise	0.311737293340451	0.436029943813082	0.435052552264677	-0.170493	-0.120547	0.405891525536684	-0.13301	-0.325996	0.280178795201623	-0.14921	0.350906936952576	-0.0254503	0.0622618016274972
1566	KWMTBOMO10185	CellTypeAll-M6	yellow	0.0146866858277814	-0.0414706	-0.0105557	0.0767414238268276	0.210087307041378	0.0658355494798105	0.237478346634229	0.0704768257067497	-0.0856075	-0.0898397	-0.10684	-0.098525	-0.115913
1567	KWMTBOMO10187	CellTypeAll-M9	pink	0.0683567168294728	-0.109088	-0.0429605	0.134766251275826	-0.0171678	-0.133325	-0.128004	0.122147439160377	0.0960051467193051	0.361491546131437	0.0232766103396566	0.312746775357967	0.194374688829331
1568	KWMTBOMO10193	CellTypeAll-M2	turquoise	0.241675918837349	0.243473706087862	0.307965240119644	-0.0233887	0.00557655219348283	0.28414179000754	-0.0887149	-0.166176	0.184643643977381	-0.076352	0.186154119743363	-0.00195797	0.0213879996697516
1569	KWMTBOMO10194	CellTypeAll-M5	brown	0.323756196648505	0.208037880791479	0.357894217799949	0.138187924447199	0.195801396678399	0.398935607952071	-0.0155096	-0.0980718	0.15540785601252	-0.10787	0.109137806067858	-0.0397645	-0.078484
1570	KWMTBOMO10196	CellTypeAll-M2	turquoise	0.155931921642565	0.0879338763429053	0.170773180276895	-0.0152008	-0.0152408	0.106366274295698	-0.0654362	-0.088716	0.171336674883562	0.0419292400405142	0.127987442565958	0.094108171254923	0.0774592537013184
1571	KWMTBOMO10208	CellTypeAll-M2	turquoise	0.208217225364786	0.127295965435272	0.233038384476711	0.0122568954323102	0.0107616147353727	0.170333008543622	-0.0703676	-0.0944965	0.182847269497033	0.0130961239885226	0.13504253373618	0.0733882531594238	0.0499855252961234
1572	KWMTBOMO10211	CellTypeAll-M12	black	0.0917410181964359	0.0779713976450468	0.112944476390309	-0.275856	-0.330494	-0.131263	-0.1275	-0.282596	0.449776739943794	0.352524088855886	0.417432146386342	0.474356444408161	0.668115973616151
1573	KWMTBOMO10220	CellTypeAll-M2	turquoise	0.159522570358779	0.11997735730907	0.203622485515859	-0.0356075	-0.0185935	0.144824543450791	-0.0656887	-0.117606	0.182010971295278	-0.00065198	0.139309779400856	0.0589186012486758	0.0555620180586188
1574	KWMTBOMO10221	CellTypeAll-M2	turquoise	0.259375003886919	0.231113618131267	0.289985431453572	-0.00390305	0.015011968536544	0.254370085084965	-0.0533409	-0.131865	0.180933263175948	-0.037469	0.176100103216418	0.037148818308953	0.0505739745160162
1575	KWMTBOMO10243	CellTypeAll-M5	brown	0.282601185482952	0.286978110956307	0.31897555112509	0.0443320385602508	0.0621103583932338	0.34514458962074	-0.0998892	-0.137353	0.147808305793167	-0.0787734	0.179179960925475	-0.0156398	-0.00704457
1576	KWMTBOMO10244	CellTypeAll-M8	blue	0.155092434451956	0.0630204447476577	0.170793215158517	-0.017065	-0.0180886	0.0967115867791048	-0.0656419	-0.0857487	0.181407455395992	0.0466900986270433	0.118462935915868	0.0969442537844315	0.0642058648859873
1577	KWMTBOMO10245	CellTypeAll-M2	turquoise	0.30962442449919	0.27841037803883	0.376707187343953	-0.0706673	0.024360899382662	0.342516925079903	0.0237977133594778	-0.204046	0.24288046600425	-0.109617	0.225961806436269	-0.00609246	0.0295729447259877
1578	KWMTBOMO10248	CellTypeAll-M12	black	0.158671746640661	0.0509763946283526	0.151025506470682	-0.114395	-0.255702	-0.0870244	-0.285556	-0.20576	0.450019387286282	0.414007683324753	0.357345051410682	0.50775005168789	0.587195982661084
1579	KWMTBOMO10257	CellTypeAll-M3	red	0.225830115876341	-0.100259	0.0902462979109388	0.498212277298848	0.355261491837791	0.150839632985183	-0.0665686	0.248883821090404	-0.0735503	0.0940611348391048	-0.164584	0.0414576416389517	-0.157685
1580	KWMTBOMO10267	CellTypeAll-M6	yellow	-0.0379948	-0.141854	-0.109527	0.108934367685826	0.189746958743511	-0.0778221	0.393995111761361	0.240666394264706	-0.177388	-0.0143207	-0.207711	-0.0813644	-0.0673318
1581	KWMTBOMO10274	CellTypeAll-M7	green	0.0307740102011765	-0.102597	-0.0770409	0.184422399480794	0.080597788949246	-0.0872211	0.0394712122457405	0.240957048641063	-0.0893273	0.17892489281161	-0.134185	0.108843778553778	0.0159208513525502
1582	KWMTBOMO10284	CellTypeAll-M5	brown	0.202973025904568	0.292310001570351	0.240572955689806	-0.0202355	0.0235050945755284	0.298448007106816	-0.0298923	-0.13821	0.0789620252443059	-0.125237	0.156269483261631	-0.0707247	-0.0180396
1583	KWMTBOMO10285	CellTypeAll-M9	pink	0.102209777034221	-0.0717889	-0.00725755	0.0632095783773466	-0.0662084	-0.126814	-0.101201	0.0997966441477908	0.128402202160407	0.366730449758657	0.05024309123885	0.338851377191696	0.253188456638281
1584	KWMTBOMO10292	CellTypeAll-M12	black	0.12512682614776	0.0390985130623695	0.100441935081154	-0.0139402	-0.0806003	-0.00762674	-0.119785	-0.0872303	0.233562263873431	0.204299889829658	0.194815102703654	0.24867972436962	0.237424891688245
1585	KWMTBOMO10293	CellTypeAll-M8	blue	0.20715375870062	0.112019920958723	0.212847740669133	-0.0815989	-0.107059	0.0650325514706869	-0.146992	-0.129306	0.323878235010471	0.153216934457216	0.219454891027346	0.228689143288519	0.212838998547685
1586	KWMTBOMO10296	CellTypeAll-M8	blue	0.242202499742753	0.0901517155853197	0.23164996409022	0.0136004311432629	0.00438772284045939	0.130656293005006	-0.0758665	-0.0836845	0.236257368700176	0.0732851090071478	0.150075588222091	0.137699997340568	0.0956088682026921
1587	KWMTBOMO10298	CellTypeAll-M7	green	0.053043394347761	-0.0963928	-0.0462568	0.156091368431664	0.0460392603397021	-0.0860339	-0.0354451	0.187721809530396	-0.0171175	0.210766477609098	-0.0805066	0.160443555357846	0.050975029675787
1588	KWMTBOMO10299	CellTypeAll-M8	blue	0.279062210486408	0.147084212069035	0.339637069033884	-0.160026	-0.149809	0.153849263721259	-0.181864	-0.293361	0.492684888004456	0.131014356788352	0.356134415457866	0.270678165413811	0.259593874859287
1589	KWMTBOMO10304	CellTypeAll-M2	turquoise	0.186085787825269	0.112413539786417	0.196086266328691	0.0085758149828574	0.00798038743662111	0.144023980708996	-0.0548019	-0.0773175	0.146022075082847	0.00833240869551627	0.111393355558065	0.0572164021051406	0.0373229246520314
1590	KWMTBOMO10307	CellTypeAll-M1	greenyellow	0.166780828717064	0.576873069715444	0.251268858490572	-0.184038	-0.140464	0.364325302303196	-0.0473646	-0.26808	0.0342246606841894	-0.216319	0.310827235571276	-0.146944	0.0342507907315892
1591	KWMTBOMO10311	CellTypeAll-M6	yellow	0.156275081817043	0.043783253306966	0.114629585264463	0.150610055422715	0.216655135529077	0.172321586218232	0.110952453944147	0.0551484480237618	-0.0201136	-0.0619653	-0.0338903	-0.0540144	-0.104809
1592	KWMTBOMO10314	CellTypeAll-M7	green	-0.00145459	-0.166614	-0.136324	0.244271730329688	0.119539934278548	-0.14018	0.0251967855391842	0.358527162898567	-0.159704	0.225002296816897	-0.233935	0.119893078960239	-0.0222602
1593	KWMTBOMO10322	CellTypeAll-M5	brown	0.21248523145087	0.129332686849782	0.210091429553498	0.118192672813876	0.171963389520465	0.252368203898157	0.0324084098398977	-0.0205314	0.0555570361701151	-0.0817449	0.0434891103221365	-0.0493895	-0.0752324
1594	KWMTBOMO10331	CellTypeAll-M2	turquoise	0.21244433442183	0.127114452487132	0.209132950106605	0.0313648797077219	0.0171517791826759	0.154603641193377	-0.0683341	-0.0797748	0.161429450078433	0.0229045922460873	0.131657083898641	0.0769204989864959	0.0605992849579243
1595	KWMTBOMO10334	CellTypeAll-M3	red	0.125770810954047	-0.0412968	0.0348976172683315	0.282119639704508	0.201098538908977	0.069492966400862	0.00339173196606528	0.170851006371326	-0.0710354	0.0659594869585975	-0.106187	0.0263723401644411	-0.0746772
1596	KWMTBOMO10337	CellTypeAll-M2	turquoise	0.362025258505352	0.225185744882643	0.401352373426491	0.003982432187034	-0.00159644	0.278066735124853	-0.131319	-0.199446	0.369476812531508	0.0589720755042436	0.286000898555837	0.177295658118926	0.165385940656166
1597	KWMTBOMO10338	CellTypeAll-M2	turquoise	0.288703214180958	0.113235476464511	0.297609785139563	0.0833940056194951	0.087426857669611	0.228508674375946	-0.0909282	-0.0752475	0.23061957601186	0.0384438433336403	0.133968891334914	0.102899058471586	0.0394917391605503
1598	KWMTBOMO10348	CellTypeAll-M1	greenyellow	0.316171540652352	0.347865064767955	0.33524327135917	0.0106319636152559	0.0494869593517851	0.335679735535641	-0.0490066	-0.156713	0.158939581841793	-0.0991027	0.203985262539706	-0.0205279	0.021933707187748
1599	KWMTBOMO10350	CellTypeAll-M2	turquoise	0.229282093578086	0.217948932071622	0.308098965169816	-0.13787	-0.0884138	0.230355304954534	-0.0665596	-0.237449	0.287439904463264	-0.035328	0.246309529263066	0.06794341754825	0.092441556660533
1600	KWMTBOMO10351	CellTypeAll-M2	turquoise	0.194753626621532	0.218945705998593	0.288490648040835	-0.092372	-0.0368804	0.264146425460056	-0.058463	-0.194593	0.201164469807075	-0.0933095	0.181261294594396	-0.013228	0.00635944872189162
1601	KWMTBOMO10353	CellTypeAll-M2	turquoise	0.269280596777791	0.164747757585911	0.288634781712283	-0.0157683	-0.00437072	0.197637537867749	-0.0674185	-0.130239	0.243362417756071	0.0200568813742927	0.178868810831173	0.100109048110814	0.0886688031028947
1602	KWMTBOMO10354	CellTypeAll-M2	turquoise	0.241259397440954	0.156050509691166	0.246808090861467	0.00701644582752547	-0.00724655	0.164597278298662	-0.0805919	-0.106119	0.222682545159727	0.0582898697671973	0.174791115236439	0.129300717940196	0.119049533177032
1603	KWMTBOMO10359	CellTypeAll-M7	green	0.0630707371017529	-0.0894853	-0.0386015	0.221851798427342	0.11807882306549	-0.0353383	-0.0365391	0.228980545108448	-0.0936028	0.133497085273944	-0.141165	0.0689929363880293	-0.0455359
1604	KWMTBOMO10368	CellTypeAll-M2	turquoise	0.248899750508078	0.16808024079783	0.26698292957198	0.0616835560239411	0.079815726908249	0.251349872960883	-0.0560362	-0.0826838	0.146430004053216	-0.0332996	0.12026924004862	0.0182837486580608	-0.00710086
1605	KWMTBOMO10369	CellTypeAll-M2	turquoise	0.225296253384953	0.178799455383529	0.299778400628942	-0.0197923	0.0830137477621057	0.297723033126053	0.0237556262125121	-0.15583	0.181674120534214	-0.118035	0.144479857579392	-0.0388656	-0.0369967
1606	KWMTBOMO10375	CellTypeAll-M6	yellow	-0.0458982	-0.305249	-0.204858	0.415951843252229	0.544254427716702	-0.0596705	0.564220193024236	0.50179317668945	-0.404421	-0.0472942	-0.472953	-0.181505	-0.2821
1607	KWMTBOMO10376	CellTypeAll-M6	yellow	0.00520404395889208	0.0848825694892767	-0.0364596	-0.0451347	-0.0417449	-0.0488022	0.122202289197949	0.0264244028418605	-0.0119791	0.105405199347683	0.0740478986960703	0.0900989850085344	0.191855226332825
1608	KWMTBOMO10382	CellTypeAll-M2	turquoise	0.151524659818012	0.0684520015589364	0.152584121274509	0.0147479257773805	0.0138959816552151	0.106241387428371	-0.0285045	-0.0508751	0.128363270085242	0.0230683363699078	0.0856896003104077	0.0658297991558527	0.0396891947634674
1609	KWMTBOMO10383	CellTypeAll-M6	yellow	0.00602562480503102	-0.0117031	0.0328109996352379	-0.0481202	0.210091183253838	0.12690661488098	0.458884848774653	-0.0332335	-0.0648629	-0.212996	-0.0870649	-0.19156	-0.151967
1610	KWMTBOMO10385	CellTypeAll-M8	blue	0.226084151080124	0.142510035252198	0.366359397478353	-0.178808	-0.101191	0.279850395182282	-0.132874	-0.363621	0.433329261522209	-0.083456	0.290156702455544	0.0506334239668824	0.0537278920207241
1611	KWMTBOMO10389	CellTypeAll-M7	green	0.0897420243094442	-0.251059	-0.152859	0.651168792967693	0.4530960613773	-0.0317509	-0.0565563	0.552459903002417	-0.35146	0.195952593382488	-0.433168	0.0267756793174821	-0.262175
1612	KWMTBOMO10391	CellTypeAll-M3	red	0.0970526160674004	-0.0875225	-0.0176488	0.366242213714878	0.27756062534841	0.0663049437083669	-0.0395303	0.226635777757184	-0.15844	0.0422983399784167	-0.188769	-0.0209609	-0.148241
1613	KWMTBOMO10397	CellTypeAll-M5	brown	0.270260789954512	0.21099087791712	0.22545944245069	0.336174278198268	0.347581298843636	0.418729910961977	-0.0812937	0.0496783124114631	-0.111226	-0.139636	-0.0416991	-0.146464	-0.254094
1614	KWMTBOMO10398	CellTypeAll-M3	red	0.110667742217134	-0.122632	-0.0832245	0.523860376538695	0.254380244308361	-0.00511551	-0.13488	0.367937710299341	-0.219501	0.202281584066011	-0.223836	0.0973607659108564	-0.0921437
1615	KWMTBOMO10416	CellTypeAll-M2	turquoise	0.203879111991298	0.184434115944009	0.250862880962319	-0.0699604	-0.0572476	0.156884166399316	-0.0929958	-0.164844	0.246436685275266	0.0253518263322877	0.211130877818859	0.111839617958051	0.127611341730112
1616	KWMTBOMO10423	CellTypeAll-M8	blue	0.245923020828474	0.0915528544285632	0.310950063939803	-0.0861225	-0.0664528	0.194028863699362	-0.115644	-0.23219	0.391011912380864	0.0271263835163025	0.245381106181531	0.125132481555211	0.0900584396846045
1617	KWMTBOMO10424	CellTypeAll-M8	blue	0.238186869865244	0.0962371518484404	0.235682608498148	0.0229015586945571	0.00041140674727327	0.135823907646936	-0.103024	-0.0842589	0.239952982470401	0.0842705158727629	0.152788489991856	0.151134539130832	0.106593556930175
1618	KWMTBOMO10439	CellTypeAll-M1	greenyellow	0.0852923845251838	0.439060569589865	0.0866040219151619	-0.0713836	-0.0990288	0.303580794207067	-0.103828	-0.188105	-0.149006	-0.210761	0.19889423590643	-0.199673	-0.124715
1619	KWMTBOMO10440	CellTypeAll-M5	brown	0.225868670074805	0.226422580482697	0.235840220214615	0.0630547245483573	0.0841222285834348	0.291076264964906	-0.0454705	-0.085988	0.0648173430245026	-0.0976643	0.110837840619803	-0.0553406	-0.0555621
1620	KWMTBOMO10443	CellTypeAll-M2	turquoise	0.450603491723201	0.220836259096195	0.463874155966394	0.0707913764388002	0.045426137003378	0.312715914676676	-0.186311	-0.159423	0.375485769363665	0.0535566416577294	0.24860723458515	0.173149640080477	0.120895441860468
1621	KWMTBOMO10453	CellTypeAll-M5	brown	0.312378669415263	0.222527416330758	0.321546587632436	0.0921062331415155	0.125755173521219	0.355787744143032	-0.0639634	-0.117698	0.171247138702642	-0.0537603	0.156830153563655	0.0161668543895992	-0.0252445
1622	KWMTBOMO10464	CellTypeAll-M7	green	0.00721830002277427	-0.204931	-0.172707	0.314574363000185	0.094848732866994	-0.188964	-0.0982589	0.417354235199912	-0.163629	0.336899729948494	-0.249028	0.20737092235252	0.00595318361634883
1623	KWMTBOMO10469	CellTypeAll-M8	blue	0.207455924604399	0.119989219707969	0.261654394029123	-0.100395	-0.0718339	0.152239803749662	-0.0765684	-0.179817	0.302503961443575	0.0206338370769767	0.202482527685151	0.109462845872618	0.101112699836398
1624	KWMTBOMO10470	CellTypeAll-M2	turquoise	0.238294030588552	0.207941297981626	0.331172336297312	-0.0975541	-0.048685	0.241041644381557	-0.0919354	-0.223544	0.301152063217636	-0.0323756	0.236106934171031	0.0698419206035718	0.0917410390604065
1625	KWMTBOMO10488	CellTypeAll-M5	brown	0.199256088938037	0.197151406315911	0.24854143243465	0.0313198041281389	0.0865019246875257	0.301154379135733	-0.0406041	-0.117769	0.106331202275091	-0.111044	0.110111422219361	-0.0588177	-0.0645216
1626	KWMTBOMO10489	CellTypeAll-M3	red	0.127761165087478	0.0982455125080676	-0.0729641	0.504162125616401	0.250055237247619	0.0952063225451257	-0.178485	0.416215182403272	-0.371263	0.146845219991035	-0.237695	0.0113189018069483	-0.139615
1627	KWMTBOMO10492	CellTypeAll-M3	red	0.0997672979213092	-0.0907224	-0.00738968	0.31944899605368	0.232631635570485	0.0417282613414883	0.0121971795743522	0.216106641023942	-0.114448	0.0664960764399197	-0.151939	0.0131942402663002	-0.0934229
1628	KWMTBOMO10509	CellTypeAll-M12	black	0.0820252421557596	0.0653109915839393	0.106194002576052	-0.286535	-0.357276	-0.14099	-0.15352	-0.286894	0.444081875154077	0.358445940480277	0.412728373484097	0.473136934101056	0.677888436694738
1629	KWMTBOMO10518	CellTypeAll-M5	brown	0.158915909882271	0.160782570154342	0.194142721735057	0.0751914715027787	0.257513099201817	0.319629293913922	0.242855034634449	-0.0327724	-0.0203146	-0.215792	0.00656372505862392	-0.183145	-0.151392
1630	KWMTBOMO10527	CellTypeAll-M8	blue	0.156767677425282	0.0401574480810437	0.164209874668115	-0.131212	-0.154169	-0.000221577	-0.147351	-0.183252	0.362812213139562	0.210107794742418	0.262831121823546	0.303100377157879	0.277308361555817
1631	KWMTBOMO10528	CellTypeAll-M5	brown	0.225369668630559	0.318874998341912	0.286011311052291	-0.0115294	0.0266277931648855	0.363881144790183	-0.0794084	-0.173195	0.0944137221311252	-0.149957	0.190026265728427	-0.0883296	-0.0491256
1632	KWMTBOMO10537	CellTypeAll-M2	turquoise	0.204558145788297	0.172007119491707	0.261174557299299	-0.0297637	0.00186845515476784	0.212919831564075	-0.0628339	-0.137726	0.190393331088605	-0.0427934	0.151623812701253	0.0258274668794136	0.0336603725566904
1633	KWMTBOMO10544	CellTypeAll-M4	tan	0.236073333835387	0.0419308044643577	0.106850443462581	0.405243724839092	0.425988146046164	0.261777748423759	0.120700912747535	0.220748158806502	-0.182448	-0.0898322	-0.179544	-0.117868	-0.229101
1634	KWMTBOMO10545	CellTypeAll-M5	brown	0.23056723058866	0.209664907679957	0.263107147696387	0.112833511703701	0.135969623845707	0.363099928305919	-0.0844081	-0.0947729	0.0612025795280104	-0.140204	0.0820039931918239	-0.0936508	-0.125435
1635	KWMTBOMO10547	CellTypeAll-M11	magenta	0.0636503393753153	-0.0480015	0.0158967752302839	-0.0192855	-0.0891209	-0.0881047	-0.0913877	-0.0129652	0.165339435885357	0.238611815033246	0.0984687981468893	0.285650757316151	0.202927553517365
1636	KWMTBOMO10558	CellTypeAll-M7	green	0.0605392743590333	-0.170169	-0.146755	0.339445535481825	0.0687805370386792	-0.182254	-0.164344	0.386410044988863	-0.114639	0.412558186212092	-0.166991	0.289198501260533	0.121287534866003
1637	KWMTBOMO10570	CellTypeAll-M2	turquoise	0.179866947687583	0.157832136623927	0.220885475060345	-0.0545163	-0.0436459	0.154196074104786	-0.0676138	-0.127382	0.183241942632331	0.000141313448238327	0.156707157477313	0.0606950558101943	0.0657885750347223
1638	KWMTBOMO10589	CellTypeAll-M6	yellow	-0.0672207	-0.143953	-0.13043	0.195928945753389	0.41628176337745	0.028998562171857	0.586840096761505	0.257911445072574	-0.300874	-0.177638	-0.28881	-0.241477	-0.232706
1639	KWMTBOMO10591	CellTypeAll-M12	black	0.0352732042624628	-0.0602417	0.0128463652051252	-0.153931	-0.228037	-0.205194	-0.0793828	-0.134084	0.34125692016505	0.404758617668404	0.267818445947649	0.471648689698802	0.60506405461389
1640	KWMTBOMO10614	CellTypeAll-M2	turquoise	0.266457775548477	0.197303263394959	0.285447417388323	0.0461426182153262	0.0802679484787461	0.277605510319552	-0.0217061	-0.107385	0.14596813336471	-0.0685689	0.133411313746957	-0.00645382	-0.0142627
1641	KWMTBOMO10619	CellTypeAll-M6	yellow	-0.0870723	-0.12939	-0.11103	0.0945463183358017	0.334352290351447	0.0115551164827159	0.467743327884378	0.165433426645804	-0.206392	-0.152816	-0.220691	-0.193105	-0.188242
1642	KWMTBOMO10639	CellTypeAll-M1	greenyellow	0.282635248537632	0.552794072721429	0.325893396646583	-0.110104	-0.0381867	0.448398968262553	-0.0178963	-0.270822	0.0539909577422418	-0.244224	0.286767639886374	-0.159255	-0.054794
1643	KWMTBOMO10661	CellTypeAll-M8	blue	0.339578738075634	0.234282427441816	0.42554409733012	-0.151015	-0.114856	0.251795555763515	-0.154065	-0.300765	0.483668377346062	0.040418509386785	0.349705220937181	0.190177206111236	0.201544390153439
1644	KWMTBOMO10663	CellTypeAll-M11	magenta	0.0944982695919569	-0.0554626	0.00830367443813346	-0.0294862	-0.176919	-0.174816	-0.158763	-0.00128919	0.265044753749316	0.430889590674471	0.192399847357192	0.482738909317866	0.433845589239984
1645	KWMTBOMO10680	CellTypeAll-M2	turquoise	0.22612787283427	0.325809995146808	0.322889831803163	-0.138125	-0.0780996	0.299742551605362	-0.0550398	-0.243475	0.21864863831696	-0.110047	0.26512786564045	-0.0119865	0.0687105628066735
1646	KWMTBOMO10690	CellTypeAll-M8	blue	0.137004548730589	0.148249501165018	0.316311892826473	-0.383875	-0.318411	0.109162061058398	-0.277089	-0.615085	0.683814197021943	0.042845594906035	0.562272600323641	0.2493225927028	0.396989381498349
1647	KWMTBOMO10697	CellTypeAll-M7	green	-0.342369	-0.328384	-0.403561	-0.0524462	0.0245213163971812	-0.371877	0.363030996452533	0.483029591139611	-0.381596	-0.025969	-0.443817	-0.216433	-0.247598
1648	KWMTBOMO10725	CellTypeAll-M4	tan	0.161797989688093	0.0243709251479005	0.109504643853431	0.179831041178163	0.234578279949091	0.146609103638557	0.0703968364098221	0.112648043329748	-0.0148355	0.0243190215442701	-0.0586905	0.0111226187473787	-0.0729378
1649	KWMTBOMO10736	CellTypeAll-M9	pink	0.00647360739309432	-0.0976883	-0.0688107	0.0315612663135866	-0.0451962	-0.135958	-0.0229353	0.0994917860264498	0.0476265810064524	0.25973417447677	-0.00699045	0.213692437302675	0.148273248267661
1650	KWMTBOMO10746	CellTypeAll-M10	purple	0.202014503276964	0.336050190645539	0.259129304401905	-0.0762237	-0.0651094	0.25210245753987	-0.107307	-0.181673	0.149123531643035	-0.0662723	0.26075976583259	0.00429464153057583	0.094455476464196
1651	KWMTBOMO10749	CellTypeAll-M2	turquoise	0.204545477924772	0.131299932539813	0.237016463119609	-0.000901292	0.00568830844563023	0.16281170405894	-0.078442	-0.0981897	0.192210244717193	0.0136588769794136	0.139971563504642	0.0743079617931737	0.0600634290815209
1652	KWMTBOMO10759	CellTypeAll-M3	red	0.0843920200832201	-0.0780199	-0.0145461	0.232736866379734	0.215035294693224	0.0107365684685339	0.0765847125384992	0.232949190508412	-0.107116	0.0699912910186417	-0.161698	0.0136183889062612	-0.0850609
1653	KWMTBOMO10780	CellTypeAll-M3	red	0.148143398877001	-0.105306	-0.0267933	0.354120567083606	0.153392001496241	-0.0554805	-0.0682419	0.274062145273606	-0.0346664	0.310248013635955	-0.0965051	0.237425842671553	0.0821169277465772
1654	KWMTBOMO10791	CellTypeAll-M7	green	0.0401563565277056	-0.0677137	-0.0330224	0.0952450618005495	0.0290602321300558	-0.0684807	0.00353297118013842	0.139030300378065	0.00174256087351921	0.161853810417835	-0.0486649	0.124843993024755	0.0547015153585467
1655	KWMTBOMO10794	CellTypeAll-M2	turquoise	0.221081504925931	0.134569452485583	0.239664000801117	0.0205796784248031	0.030660403388755	0.175762171849546	-0.054958	-0.0792092	0.170169508260144	-0.00323226	0.120955214976495	0.0566336300250668	0.0386396915795067
1656	KWMTBOMO10816	CellTypeAll-M7	green	0.0431015209120295	-0.270725	-0.160958	0.513533378634105	0.405636728017434	-0.0831706	0.0875483156708088	0.548167109857039	-0.319326	0.182113340367593	-0.434917	0.017795485606951	-0.247955
1657	KWMTBOMO10822	CellTypeAll-M8	blue	0.130713903442427	0.0822708642680508	0.221528011874791	-0.174424	-0.134686	0.0974443323778209	-0.138344	-0.304228	0.406263859889206	0.0191125229679792	0.289956981278828	0.121486176093938	0.169790918972288
1658	KWMTBOMO10829	CellTypeAll-M2	turquoise	0.264006224684296	0.224725043454315	0.302855883827411	0.0178927571645068	0.0405024550000839	0.264071895151552	-0.0632204	-0.122054	0.179192482274155	-0.0482553	0.162395648414392	0.0212438710976566	0.0338380569564027
1659	KWMTBOMO10835	CellTypeAll-M2	turquoise	0.217926516642535	0.172486761731884	0.238984428443454	0.016692666482378	0.0465877575734043	0.212085222963782	-0.0281906	-0.0944048	0.149044843704039	-0.0310194	0.13946646650801	0.0260494972396466	0.0301723154334756
1660	KWMTBOMO10843	CellTypeAll-M6	yellow	-0.136132	-0.130954	-0.145449	-0.0274817	0.181267069283668	-0.0807929	0.5905384190094	0.173053696403802	-0.191502	-0.148262	-0.185496	-0.181019	-0.103739
1661	KWMTBOMO10853	CellTypeAll-M12	black	0.136303665244933	0.0343333843979868	0.0973956926827038	-0.0995647	-0.188659	-0.0731788	-0.169194	-0.126944	0.3206251171914	0.327072168173302	0.266561954348519	0.393877126890635	0.394803468013405
1662	KWMTBOMO10882	CellTypeAll-M7	green	-0.315	-0.321458	-0.393705	-0.018198	0.0173053618505186	-0.374756	0.33652045990402	0.482995744398089	-0.366732	0.0426364481491131	-0.430627	-0.149508	-0.184726
1663	KWMTBOMO10901	CellTypeAll-M2	turquoise	0.37837462458285	0.267836950207867	0.406908718609701	0.0699975501540632	0.117284207110195	0.369037740781946	-0.0343843	-0.146527	0.231757786287494	-0.0795622	0.19841585238843	0.0147486624842421	0.0124177718059274
1664	KWMTBOMO10903	CellTypeAll-M6	yellow	-0.136305	-0.126823	-0.139555	-0.0411887	0.24769309811968	-0.0373375	0.664014028709094	0.130304225833494	-0.19597	-0.196805	-0.192618	-0.221215	-0.129287
1665	KWMTBOMO10907	CellTypeAll-M2	turquoise	0.390442024318021	0.24039930242465	0.434886338519071	0.0462559788410339	0.0738864561063025	0.356736938993727	-0.0971624	-0.164469	0.286191775244659	-0.0639661	0.216165528180655	0.0441824330400503	0.0235433709082792
1666	KWMTBOMO10908	CellTypeAll-M2	turquoise	0.296072934592353	0.24309088458729	0.334351306351356	-0.0485634	-0.0381863	0.228924342165742	-0.0927187	-0.170262	0.280006711657698	0.00986658705188151	0.237261170433938	0.10711957293133	0.123418417531872
[truncated: 836 more rows]
