# Supplementary material for: A silkworm model reveals coordinated cellular communities and conserved Hippo regulation in silk production
Source: Research Square preprint supplement (doi:10.21203/rs.3.rs-7747598/v1), 2025-10-01
Supplement: Supplementary file 69 [file Supplementary Data 7.xlsx]

## Sheet: main
Supplementary Data 7. Functional enrichment analysis of each module.
1	Module 1
2	Module 2
3	Module 3
4	Module 4
5	Module 5
6	Module 6
7	Module 7
8	Module 8
9	Module 9
10	Module 10
11	Module 11
12	Module 12

## Sheet: 1-module 1
KEGG enrichment	category	subcategory	ID	Description	GeneRatio	BgRatio	pvalue	p.adjust	qvalue	geneID	Count
	Metabolism	Global and overview maps	bmor01232	Nucleotide metabolism - Bombyx mori (domestic silkworm)	2025-04-20	59/3418	0.000315779876039688	0.00852605665307156	0.00631559752079375	101736818/101736970/101744387/101746046	4
	Metabolism	Metabolism of cofactors and vitamins	bmor00760	Nicotinate and nicotinamide metabolism - Bombyx mori (domestic silkworm)	2025-02-20	16/3418	0.00371691544373328	0.0501783584903993	0.0371691544373328	101736818/101744387	2
	Metabolism	Lipid metabolism	bmor00564	Glycerophospholipid metabolism - Bombyx mori (domestic silkworm)	2025-03-20	72/3418	0.00790066432274052	0.0711059789046647	0.0526710954849368	101741961/101746631/101745230	3
	Metabolism	Nucleotide metabolism	bmor00240	Pyrimidine metabolism - Bombyx mori (domestic silkworm)	2025-02-20	34/3418	0.0163153634425174	0.0883321690540814	0.0654312363363566	101736970/101744387	2
	Metabolism	Nucleotide metabolism	bmor00230	Purine metabolism - Bombyx mori (domestic silkworm)	2025-03-20	94/3418	0.0163578090840891	0.0883321690540814	0.0654312363363566	101736818/101744387/101746046	3
	Environmental Information Processing	Membrane transport	bmor02010	ABC transporters - Bombyx mori (domestic silkworm)	2025-02-20	40/3418	0.0222142883064942	0.099964297379224	0.0740476276883141	101735430/101743689	2
	Environmental Information Processing	Signal transduction	bmor04070	Phosphatidylinositol signaling system - Bombyx mori (domestic silkworm)	2025-02-20	47/3418	0.0300447490967763	0.109546956473637	0.0811458936841757	101741961/101743221	2
	Metabolism	Lipid metabolism	bmor00561	Glycerolipid metabolism - Bombyx mori (domestic silkworm)	2025-02-20	49/3418	0.0324583574736703	0.109546956473637	0.0811458936841757	101741961/101745230	2
	NA	NA	bmor04981	Folate transport and metabolism - Bombyx mori (domestic silkworm)	2025-01-20	19/3418	0.105775306516686	0.263034364009149	0.194840269636407	101743689	1
	Metabolism	Carbohydrate metabolism	bmor00051	Fructose and mannose metabolism - Bombyx mori (domestic silkworm)	2025-01-20	22/3418	0.121472278197691	0.263034364009149	0.194840269636407	101739920	1
	Metabolism	Lipid metabolism	bmor00592	alpha-Linolenic acid metabolism - Bombyx mori (domestic silkworm)	2025-01-20	22/3418	0.121472278197691	0.263034364009149	0.194840269636407	101746631	1
	Cellular Processes	Cell motility	bmor04814	Motor proteins - Bombyx mori (domestic silkworm)	2025-02-20	105/3418	0.124196249227772	0.263034364009149	0.194840269636407	101736752/101744927	2
	Cellular Processes	Transport and catabolism	bmor04136	Autophagy - other - Bombyx mori (domestic silkworm)	2025-01-20	23/3418	0.126646175263664	0.263034364009149	0.194840269636407	101738071	1
	Metabolism	Metabolism of cofactors and vitamins	bmor00670	One carbon pool by folate - Bombyx mori (domestic silkworm)	2025-01-20	26/3418	0.141994746737042	0.264696731956118	0.196071653300828	101747054	1
	Metabolism	Metabolism of cofactors and vitamins	bmor00130	Ubiquinone and other terpenoid-quinone biosynthesis - Bombyx mori (domestic silkworm)	2025-01-20	27/3418	0.147053739975621	0.264696731956118	0.196071653300828	101747041	1
	Metabolism	Lipid metabolism	bmor00565	Ether lipid metabolism - Bombyx mori (domestic silkworm)	2025-01-20	31/3418	0.167007755471673	0.271461343644202	0.201082476773483	101746631	1
	Genetic Information Processing	Folding, sorting and degradation	bmor04141	Protein processing in endoplasmic reticulum - Bombyx mori (domestic silkworm)	2025-02-20	128/3418	0.17092010525746	0.271461343644202	0.201082476773483	101737157/101736562	2
	Metabolism	Carbohydrate metabolism	bmor00562	Inositol phosphate metabolism - Bombyx mori (domestic silkworm)	2025-01-20	43/3418	0.224243163591159	0.318661337734805	0.236045435359115	101743221	1
	Environmental Information Processing	Signal transduction	bmor04350	TGF-beta signaling pathway - Bombyx mori (domestic silkworm)	2025-01-20	43/3418	0.224243163591159	0.318661337734805	0.236045435359115	101741200	1
	Metabolism	Lipid metabolism	bmor00590	Arachidonic acid metabolism - Bombyx mori (domestic silkworm)	2025-01-20	56/3418	0.282024962358889	0.362603523032857	0.268595202246561	101746631	1
GO enrichment		ONTOLOGY	ID	Description	GeneRatio	BgRatio	pvalue	p.adjust	qvalue	geneID	Count
	GO:0019637	BP	GO:0019637	organophosphate metabolic process	2025-06-19	137/2885	0.000167174601936366	0.0258329120336057	0.0258329120336057	LOC101739920/LOC101736970/LOC101746631/LOC101745230/LOC101746046/LOC101743221	6
	GO:0006796	BP	GO:0006796	phosphate-containing compound metabolic process	2025-08-19	311/2885	0.000433679037874929	0.0258329120336057	0.0258329120336057	LOC101741200/LOC101739920/LOC101747162/LOC101736970/LOC101746631/LOC101745230/LOC101746046/LOC101743221	8
	GO:0006793	BP	GO:0006793	phosphorus metabolic process	2025-08-19	316/2885	0.000484367100630107	0.0258329120336057	0.0258329120336057	LOC101741200/LOC101739920/LOC101747162/LOC101736970/LOC101746631/LOC101745230/LOC101746046/LOC101743221	8

## Sheet: 2-module 2
KEGG enrichment	category	subcategory	ID	Description	GeneRatio	BgRatio	pvalue	p.adjust	qvalue	geneID	Count
	Genetic Information Processing	Translation	bmor03015	mRNA surveillance pathway - Bombyx mori (domestic silkworm)	16/222	70/3418	6.20918902644732e-06	0.000676801603882758	0.000653598844889192	732878/101737123/693102/101736072/101740584/101744068/733020/692806/101739030/101737197/100127018/101735812/101741570/101741574/101740520/101745127	16
	Genetic Information Processing	Translation	bmor03013	Nucleocytoplasmic transport - Bombyx mori (domestic silkworm)	16/222	80/3418	3.75115391239901e-05	0.00204437888225746	0.00197429153284159	101736825/101746595/732878/732872/101740026/693102/101741033/101742428/101735469/101742889/101737307/101744401/101737898/101739030/732957/101735812	16
	Genetic Information Processing	Translation	bmor00970	Aminoacyl-tRNA biosynthesis - Bombyx mori (domestic silkworm)	10/222	39/3418	0.000130396659525324	0.00452787367462495	0.00437264478476577	101739633/101739619/100499569/100500762/101737531/101737111/101743685/101740700/101741795/101739247	10
	Genetic Information Processing	Transcription	bmor03040	Spliceosome - Bombyx mori (domestic silkworm)	20/222	128/3418	0.000166160501821099	0.00452787367462495	0.00437264478476577	732878/101742953/101742077/101742946/101738204/101738991/733142/101736072/101735777/101743582/101742390/101735469/733053/101737557/101736317/101741771/101736137/101746103/101737821/101735962	20
	Genetic Information Processing	Information processing in viruses	bmor03250	Viral life cycle - HIV-1 - Bombyx mori (domestic silkworm)	7/222	28/3418	0.00161858161187388	0.0352850791388506	0.0340754023552396	101746595/101742428/101740584/101744401/101744352/101740139/101735821	7
	Genetic Information Processing	Chromosome	bmor03083	Polycomb repressive complex - Bombyx mori (domestic silkworm)	8/222	38/3418	0.00249166045541956	0.045265164940122	0.0437133413231502	100529124/101745949/101737999/101745450/100862749/101739693/101744757/100301503	8
	Genetic Information Processing	Chromosome	bmor03082	ATP-dependent chromatin remodeling - Bombyx mori (domestic silkworm)	10/222	67/3418	0.0102201776414003	0.159142766130377	0.153686881825569	101743995/101738367/101735441/101740829/101741800/101739938/101744798/101741792/101744352/101742923	10
	Metabolism	Amino acid metabolism	bmor00310	Lysine degradation - Bombyx mori (domestic silkworm)	6/222	39/3418	0.0376926303091424	0.513562087962065	0.4959556619624	732951/101738271/101742231/101745450/733015/101747197	6
	Metabolism	Glycan biosynthesis and metabolism	bmor00514	Other types of O-glycan biosynthesis - Bombyx mori (domestic silkworm)	4/222	21/3418	0.0432558021669559	0.523875826244244	0.505915814818198	101736677/101744145/101736088/101737401	4
	Metabolism	Metabolism of other amino acids	bmor00410	beta-Alanine metabolism - Bombyx mori (domestic silkworm)	5/222	33/3418	0.0591427218756311	0.644655668444379	0.622554967111907	101744675/101746776/101735662/101745648/733015	5
	Metabolism	Nucleotide metabolism	bmor00240	Pyrimidine metabolism - Bombyx mori (domestic silkworm)	5/222	34/3418	0.0658343372149261	0.65235843240245	0.629993657559102	100873153/101736884/101737574/101744022/692983	5
	Metabolism	Lipid metabolism	bmor00071	Fatty acid degradation - Bombyx mori (domestic silkworm)	5/222	36/3418	0.0804311676608145	0.705134917823263	0.680960809100206	732951/101744675/101746776/101735662/733015	5
	Metabolism	Metabolism of cofactors and vitamins	bmor00670	One carbon pool by folate - Bombyx mori (domestic silkworm)	4/222	26/3418	0.0840986599238754	0.705134917823263	0.680960809100206	101744981/101741082/692975/101741628	4
	Metabolism	Carbohydrate metabolism	bmor00640	Propanoate metabolism - Bombyx mori (domestic silkworm)	4/222	27/3418	0.0939376225793147	0.731371490081807	0.706297914130186	101744675/101746776/101735662/101738903	4
	NA	NA	bmor04981	Folate transport and metabolism - Bombyx mori (domestic silkworm)	3/222	19/3418	0.121561948929367	0.839160222131613	0.810391329919472	101746706/101735925/692975	3
	Metabolism	Global and overview maps	bmor01240	Biosynthesis of cofactors - Bombyx mori (domestic silkworm)	14/222	154/3418	0.12317948214776	0.839160222131613	0.810391329919472	100101152/101738185/101736884/101742139/101737574/101735925/101735797/692975/101741628/733015/101745478/101739736/101736648/101739247	14
GO enrichment		ONTOLOGY	ID	Description	GeneRatio	BgRatio	pvalue	p.adjust	qvalue	geneID	Count
	GO:0016070	BP	GO:0016070	RNA metabolic process	45/144	415/2885	8.6169269113576e-08	3.05039212662059e-05	2.81183930791669e-05	LOC101742096/LOC101741660/LOC101739633/Y14/LOC101744865/LOC101739548/LOC101737999/LOC101744864/LOC101739652/LOC101735398/LOC693102/LOC101743187/FRSB/FRSA/LOC101738096/LOC101737968/LOC101744431/LOC101741457/LOC101743389/LOC101738496/LOC101737159/Stat/LOC101742368/LOC101745399/LOC101742390/LOC101737111/LOC101740584/E2f1/Elf/LOC101744676/LOC101740700/Achi/Psi/LOC101742846/LOC101735812/LOC101741570/L…	45
	GO:0016071	BP	GO:0016071	mRNA metabolic process	15/144	98/2885	7.2937125773903e-05	0.0129098712619808	0.0119002678894263	Y14/LOC101739548/LOC101744864/LOC693102/LOC101744431/LOC101742368/LOC101742390/LOC101740584/Elf/LOC101744676/LOC101735812/LOC101741570/LOC101738381/LOC101735962/LOC101746473	15
	GO:0001732	BP	GO:0001732	formation of cytoplasmic translation initiation complex	5/144	13/2885	0.000268865543849438	0.028354717216066	0.0261372653493323	LOC101737255/LOC101744517/eIF3c/eIF3-S7/LOC733089	5
	GO:0006396	BP	GO:0006396	RNA processing	19/144	162/2885	0.000320392284927299	0.028354717216066	0.0261372653493323	Y14/LOC101739548/LOC101735398/LOC101744431/LOC101741457/LOC101738496/LOC101742368/LOC101742390/LOC101740584/LOC101744676/LOC101735812/LOC101741570/LOC101738381/LOC101742289/LOC101746103/LOC101735962/LOC101746473/LOC101737904/LOC101745895	19
	GO:0002183	BP	GO:0002183	cytoplasmic translational initiation	5/144	14/2885	0.000401540878162635	0.0284290941739145	0.0262058257327193	LOC101737255/LOC101744517/eIF3c/eIF3-S7/LOC733089	5
	GO:0006397	BP	GO:0006397	mRNA processing	12/144	81/2885	0.000542343605790659	0.0292451256346549	0.0269580402817217	Y14/LOC101739548/LOC101744431/LOC101742368/LOC101742390/LOC101740584/LOC101744676/LOC101735812/LOC101741570/LOC101738381/LOC101735962/LOC101746473	12
	GO:0006413	BP	GO:0006413	translational initiation	5/144	15/2885	0.000578293444753063	0.0292451256346549	0.0269580402817217	LOC101737255/LOC101744517/eIF3c/eIF3-S7/LOC733089	5
	GO:0002181	BP	GO:0002181	cytoplasmic translation	5/144	17/2885	0.00109863418376226	0.0457535420689338	0.0421754327724338	LOC101737255/LOC101744517/eIF3c/eIF3-S7/LOC733089	5
	GO:0065003	BP	GO:0065003	protein-containing complex assembly	12/144	88/2885	0.00116322564582035	0.0457535420689338	0.0421754327724338	LOC101738677/LOC101736681/LOC101737651/LOC101738948/LOC101737255/LOC101744517/eIF3c/eIF3-S7/LOC692975/LOC101744676/LOC733089/LOC101738203	12
	GO:0006418	BP	GO:0006418	tRNA aminoacylation for protein translation	5/144	19/2885	0.00190367604791116	0.0475004175483485	0.0437856956288672	LOC101739633/FRSB/FRSA/LOC101737111/LOC101740700	5
	GO:0022618	BP	GO:0022618	protein-RNA complex assembly	6/144	28/2885	0.00210725995867231	0.0475004175483485	0.0437856956288672	LOC101737255/LOC101744517/eIF3c/eIF3-S7/LOC101744676/LOC733089	6
	GO:0009889	BP	GO:0009889	regulation of biosynthetic process	21/144	218/2885	0.00217027277842062	0.0475004175483485	0.0437856956288672	Tudor-SN/LOC101742096/LOC101741660/LOC101740268/LOC101737999/LOC693102/Loqs/LOC101741377/LOC101743389/LOC101738496/Stat/LOC101745399/LOC101744266/E2f1/Elf/LOC101737557/Achi/Psi/LOC101742846/MLE/Rybp	21
	GO:0010468	BP	GO:0010468	regulation of gene expression	21/144	218/2885	0.00217027277842062	0.0475004175483485	0.0437856956288672	Tudor-SN/LOC101742096/LOC101741660/LOC101740268/LOC101737999/LOC693102/Loqs/LOC101741377/LOC101743389/LOC101738496/Stat/LOC101745399/LOC101744266/E2f1/Elf/LOC101737557/Achi/Psi/LOC101742846/MLE/Rybp	21
	GO:0010556	BP	GO:0010556	regulation of macromolecule biosynthetic process	21/144	218/2885	0.00217027277842062	0.0475004175483485	0.0437856956288672	Tudor-SN/LOC101742096/LOC101741660/LOC101740268/LOC101737999/LOC693102/Loqs/LOC101741377/LOC101743389/LOC101738496/Stat/LOC101745399/LOC101744266/E2f1/Elf/LOC101737557/Achi/Psi/LOC101742846/MLE/Rybp	21
	GO:0031326	BP	GO:0031326	regulation of cellular biosynthetic process	21/144	218/2885	0.00217027277842062	0.0475004175483485	0.0437856956288672	Tudor-SN/LOC101742096/LOC101741660/LOC101740268/LOC101737999/LOC693102/Loqs/LOC101741377/LOC101743389/LOC101738496/Stat/LOC101745399/LOC101744266/E2f1/Elf/LOC101737557/Achi/Psi/LOC101742846/MLE/Rybp	21
	GO:0043038	BP	GO:0043038	amino acid activation	5/144	20/2885	0.00243754828333729	0.0475004175483485	0.0437856956288672	LOC101739633/FRSB/FRSA/LOC101737111/LOC101740700	5
	GO:0043039	BP	GO:0043039	tRNA aminoacylation	5/144	20/2885	0.00243754828333729	0.0475004175483485	0.0437856956288672	LOC101739633/FRSB/FRSA/LOC101737111/LOC101740700	5
	GO:0043933	BP	GO:0043933	protein-containing complex organization	14/144	122/2885	0.00253096279629952	0.0475004175483485	0.0437856956288672	LOC101738677/LOC101736681/LOC101744580/LOC101737651/LOC101738948/LOC101737255/LOC101744517/eIF3c/LOC101744352/eIF3-S7/LOC692975/LOC101744676/LOC733089/LOC101738203	14
	GO:0071826	BP	GO:0071826	protein-RNA complex organization	6/144	29/2885	0.00254945743903565	0.0475004175483485	0.0437856956288672	LOC101737255/LOC101744517/eIF3c/eIF3-S7/LOC101744676/LOC733089	6
	GO:0031323	BP	GO:0031323	regulation of cellular metabolic process	22/144	238/2885	0.00287914025353737	0.0487609393156848	0.0449476395714014	Tudor-SN/LOC101742096/LOC101741660/LOC101740268/LOC101737999/LOC693102/Loqs/LOC101741377/LOC101743389/LOC101738496/Stat/LOC101745399/LOC101744266/E2f1/Elf/LOC101737557/Achi/Psi/LOC101742846/MLE/Rybp/LOC101747108	22
	GO:0044271	BP	GO:0044271	cellular nitrogen compound biosynthetic process	36/144	462/2885	0.00289259809499825	0.0487609393156848	0.0449476395714014	LOC101742096/LOC101741660/LOC101739633/LOC692855/LOC101744865/LOC101737999/LOC101739652/RnrS/FRSB/FRSA/LOC101738096/LOC101738185/LOC101743389/LOC101741082/LOC101737159/Stat/LOC101737574/LOC101745399/LOC101737255/LOC101737111/LOC101744266/LOC692983/LOC101744993/E2f1/LOC101744517/eIF3c/eIF3-S7/Elf/LOC101740700/LOC733089/Achi/Psi/LOC101742846/LOC101739736/LOC101736995/Rybp	36
	GO:0005852	CC	GO:0005852	eukaryotic translation initiation factor 3 complex	5/165	13/3687	0.000162364944450383	0.00401853237514699	0.0039309407603777	LOC101737255/LOC101744517/eIF3c/eIF3-S7/LOC733089	5
	GO:0016282	CC	GO:0016282	eukaryotic 43S preinitiation complex	5/165	13/3687	0.000162364944450383	0.00401853237514699	0.0039309407603777	LOC101737255/LOC101744517/eIF3c/eIF3-S7/LOC733089	5
	GO:0033290	CC	GO:0033290	eukaryotic 48S preinitiation complex	5/165	13/3687	0.000162364944450383	0.00401853237514699	0.0039309407603777	LOC101737255/LOC101744517/eIF3c/eIF3-S7/LOC733089	5
	GO:0070993	CC	GO:0070993	translation preinitiation complex	5/165	13/3687	0.000162364944450383	0.00401853237514699	0.0039309407603777	LOC101737255/LOC101744517/eIF3c/eIF3-S7/LOC733089	5
	GO:0140640	MF	GO:0140640	catalytic activity, acting on a nucleic acid	29/197	154/4109	7.5869755168386e-11	1.38841651958146e-08	1.189957212641e-08	Tudor-SN/LOC101739633/LOC101742077/LOC101744865/LOC101735398/LOC101743187/LOC101738840/FRSB/LOC101746400/FRSA/LOC101738675/Dnmt1/LOC101744431/LOC101741457/LOC101738496/LOC101743850/LOC101737159/LOC101743582/LOC101738676/LOC101737111/LOC101744798/LOC101740311/LOC101743298/LOC101740700/LOC101741230/LOC101746103/LOC101746473/LOC101736995/MLE	29
	GO:0140098	MF	GO:0140098	catalytic activity, acting on RNA	24/197	110/4109	1.56828679265006e-10	1.4349824152748e-08	1.2298670110782e-08	Tudor-SN/LOC101739633/LOC101742077/LOC101744865/LOC101735398/LOC101743187/FRSB/FRSA/LOC101738675/LOC101744431/LOC101741457/LOC101738496/LOC101743850/LOC101737159/LOC101743582/LOC101737111/LOC101740311/LOC101743298/LOC101740700/LOC101741230/LOC101746103/LOC101746473/LOC101736995/MLE	24
	GO:0003723	MF	GO:0003723	RNA binding	35/197	258/4109	8.47747660122668e-09	5.17126072674827e-07	4.43208425818518e-07	Y14/LOC101743700/LOC101742077/LOC101739548/LOC733119/LOC101743187/FRSB/LOC778479/LOC101746400/FRSA/Sfrs6/Loqs/LOC101737968/LOC101741377/LOC101738496/LOC101735777/LOC101742368/LOC101744266/LOC101740584/Rbp1/LOC101744517/eIF3c/eIF3-S7/Taf1/LOC101744676/LOC101739030/LOC101737557/Psi/Hrp28/LOC101743393/LOC101738381/LOC101742289/Bmp-2/LOC101737904/MLE	35
	GO:0003743	MF	GO:0003743	translation initiation factor activity	9/197	39/4109	6.74405550608702e-05	0.00308540539403481	0.0026443796589657	LOC778479/LOC778502/LOC101737255/LOC101743108/LOC101744517/eIF3c/eIF3-S7/LOC733088/LOC733089	9
	GO:0004386	MF	GO:0004386	helicase activity	9/197	44/4109	0.000183084096950234	0.00515429479612237	0.00441754342606979	LOC101742077/LOC101743187/LOC101738840/LOC101746400/LOC101743582/LOC101738676/LOC101743298/LOC101746103/MLE	9
	GO:0140101	MF	GO:0140101	catalytic activity, acting on a tRNA	8/197	35/4109	0.000186132003715946	0.00515429479612237	0.00441754342606979	LOC101739633/LOC101735398/FRSB/FRSA/LOC101738675/LOC101737111/LOC101740311/LOC101740700	8
	GO:0008135	MF	GO:0008135	translation factor activity, RNA binding	10/197	55/4109	0.000225324362672016	0.00515429479612237	0.00441754342606979	LOC778479/LOC778502/LOC101737255/LOC101743108/LOC101744517/eIF3c/eIF3-S7/Elf/LOC733088/LOC733089	10
	GO:0090079	MF	GO:0090079	translation regulator activity, nucleic acid binding	10/197	55/4109	0.000225324362672016	0.00515429479612237	0.00441754342606979	LOC778479/LOC778502/LOC101737255/LOC101743108/LOC101744517/eIF3c/eIF3-S7/Elf/LOC733088/LOC733089	10
	GO:0045182	MF	GO:0045182	translation regulator activity	10/197	56/4109	0.000263033878517679	0.00534835552985947	0.00458386525136072	LOC778479/LOC778502/LOC101737255/LOC101743108/LOC101744517/eIF3c/eIF3-S7/Elf/LOC733088/LOC733089	10
	GO:0016741	MF	GO:0016741	transferase activity, transferring one-carbon groups	11/197	68/4109	0.000321795109116741	0.00588885049683636	0.00504710223772572	LOC101738675/Dnmt1/LOC101737968/LOC101744431/LOC101741457/LOC101741082/LOC101743850/LOC101740311/LOC692975/LOC101745966/LOC101742289	11
	GO:0005524	MF	GO:0005524	ATP binding	33/197	382/4109	0.000491261793721756	0.0081728098410074	0.00700459399660686	LOC101739633/LOC692855/LOC101742077/LOC101743187/LOC101738840/LOC101738077/FRSB/LOC101737738/LOC101746400/FRSA/LOC101738185/CDK12/LOC100174852/LOC101744022/LOC101743582/LOC101746706/LOC105841683/LOC101737111/LOC101744798/LOC101743298/DnaJ-14/PKG-I/LOC101735925/LOC101735797/LOC692983/LOC101735425/LOC101740700/LOC101744569/LOC101738203/LOC101737835/LOC101746103/LOC101741238/MLE	33
	GO:0030554	MF	GO:0030554	adenyl nucleotide binding	35/197	421/4109	0.000670486374336468	0.0100540712888714	0.00861694922083311	LOC101739633/LOC732951/LOC692855/LOC101742077/LOC101743187/LOC101738840/LOC101738077/FRSB/LOC101737738/LOC101746400/FRSA/LOC101738185/CDK12/LOC100174852/LOC101744022/LOC101743582/LOC101746706/LOC105841683/LOC101737111/LOC101744798/LOC101743298/DnaJ-14/PKG-I/LOC101735925/LOC101735797/LOC692983/LOC101735425/LOC100101164/LOC101740700/LOC101744569/LOC101738203/LOC101737835/LOC101746103/LOC101741238/M…	35
	GO:0032559	MF	GO:0032559	adenyl ribonucleotide binding	33/197	390/4109	0.000714223643471738	0.0100540712888714	0.00861694922083311	LOC101739633/LOC692855/LOC101742077/LOC101743187/LOC101738840/LOC101738077/FRSB/LOC101737738/LOC101746400/FRSA/LOC101738185/CDK12/LOC100174852/LOC101744022/LOC101743582/LOC101746706/LOC105841683/LOC101737111/LOC101744798/LOC101743298/DnaJ-14/PKG-I/LOC101735925/LOC101735797/LOC692983/LOC101735425/LOC101740700/LOC101744569/LOC101738203/LOC101737835/LOC101746103/LOC101741238/MLE	33
	GO:0008168	MF	GO:0008168	methyltransferase activity	10/197	65/4109	0.00090690537036002	0.011854548769706	0.0101600676829807	LOC101738675/Dnmt1/LOC101737968/LOC101744431/LOC101741457/LOC101743850/LOC101740311/LOC692975/LOC101745966/LOC101742289	10
	GO:0003724	MF	GO:0003724	RNA helicase activity	6/197	26/4109	0.00115736452990992	0.0132373568108447	0.0113452180892485	LOC101742077/LOC101743187/LOC101743582/LOC101743298/LOC101746103/MLE	6
	GO:0008186	MF	GO:0008186	ATP-dependent activity, acting on RNA	6/197	26/4109	0.00115736452990992	0.0132373568108447	0.0113452180892485	LOC101742077/LOC101743187/LOC101743582/LOC101743298/LOC101746103/MLE	6
	GO:0008173	MF	GO:0008173	RNA methyltransferase activity	5/197	18/4109	0.00123656813969177	0.0133112923272703	0.011408585313565	LOC101738675/LOC101744431/LOC101741457/LOC101743850/LOC101740311	5
	GO:0004812	MF	GO:0004812	aminoacyl-tRNA ligase activity	5/197	19/4109	0.00161363747114204	0.0155418766957365	0.0133203314792335	LOC101739633/FRSB/FRSA/LOC101737111/LOC101740700	5
	GO:0016875	MF	GO:0016875	ligase activity, forming carbon-oxygen bonds	5/197	19/4109	0.00161363747114204	0.0155418766957365	0.0133203314792335	LOC101739633/FRSB/FRSA/LOC101737111/LOC101740700	5

## Sheet: 3-module 3
KEGG enrichment	category	subcategory	ID	Description	GeneRatio	BgRatio	pvalue	p.adjust	qvalue	geneID	Count
	Cellular Processes	Transport and catabolism	bmor04145	Phagosome - Bombyx mori (domestic silkworm)	7/60	76/3418	0.000305243430346027	0.0216722835545679	0.0202424590650523	733031/732966/100037424/692432/692859/101741915/100037422	7
	Metabolism	Carbohydrate metabolism	bmor00010	Glycolysis / Gluconeogenesis - Bombyx mori (domestic silkworm)	5/60	46/3418	0.00111145246522612	0.0394565625155274	0.0368534238469715	100124423/101741280/778467/101737657/778462	5
	Cellular Processes	Transport and catabolism	bmor04142	Lysosome - Bombyx mori (domestic silkworm)	6/60	119/3418	0.016938932229363	0.282050538597631	0.263442311810983	733031/732966/101743908/101747227/692859/101741915	6
	Metabolism	Xenobiotics biodegradation and metabolism	bmor00983	Drug metabolism - other enzymes - Bombyx mori (domestic silkworm)	5/60	91/3418	0.020671312713858	0.282050538597631	0.263442311810983	100141440/101737414/101739179/100862843/692521	5
	Metabolism	Nucleotide metabolism	bmor00230	Purine metabolism - Bombyx mori (domestic silkworm)	5/60	94/3418	0.0234465758555982	0.282050538597631	0.263442311810983	101736773/692412/101742671/101743020/101739179	5
	Metabolism	Energy metabolism	bmor00190	Oxidative phosphorylation - Bombyx mori (domestic silkworm)	6/60	131/3418	0.0259450983420219	0.282050538597631	0.263442311810983	733031/732966/100037424/692859/101741915/100037422	6
	Metabolism	Amino acid metabolism	bmor00270	Cysteine and methionine metabolism - Bombyx mori (domestic silkworm)	3/60	38/3418	0.0280719336322004	0.282050538597631	0.263442311810983	100124423/101742584/692801	3
	Metabolism	Global and overview maps	bmor01230	Biosynthesis of amino acids - Bombyx mori (domestic silkworm)	4/60	69/3418	0.0317803423771979	0.282050538597631	0.263442311810983	101738265/692801/101746807/778467	4
	Metabolism	Carbohydrate metabolism	bmor00051	Fructose and mannose metabolism - Bombyx mori (domestic silkworm)	2/60	22/3418	0.0559102158961749	0.407649126941169	0.380754558892419	778467/100529206	2
	Metabolism	Amino acid metabolism	bmor00220	Arginine biosynthesis - Bombyx mori (domestic silkworm)	2/60	24/3418	0.0653366260139438	0.407649126941169	0.380754558892419	101738265/101746807	2
	Metabolism	Carbohydrate metabolism	bmor00500	Starch and sucrose metabolism - Bombyx mori (domestic silkworm)	2/60	24/3418	0.0653366260139438	0.407649126941169	0.380754558892419	693027/778462	2
	Metabolism	Metabolism of other amino acids	bmor00480	Glutathione metabolism - Bombyx mori (domestic silkworm)	3/60	55/3418	0.0709180187321676	0.407649126941169	0.380754558892419	100141440/732996/692521	3
	Metabolism	Carbohydrate metabolism	bmor00040	Pentose and glucuronate interconversions - Bombyx mori (domestic silkworm)	3/60	57/3418	0.0771988965636241	0.407649126941169	0.380754558892419	100529206/732960/100862843	3
	Metabolism	Carbohydrate metabolism	bmor00030	Pentose phosphate pathway - Bombyx mori (domestic silkworm)	2/60	27/3418	0.0803815179883995	0.407649126941169	0.380754558892419	778467/778462	2
	Metabolism	Xenobiotics biodegradation and metabolism	bmor00982	Drug metabolism - cytochrome P450 - Bombyx mori (domestic silkworm)	3/60	62/3418	0.0939264304724002	0.444585104236028	0.415253692614822	100141440/100862843/692521	3
	Metabolism	Amino acid metabolism	bmor00330	Arginine and proline metabolism - Bombyx mori (domestic silkworm)	2/60	31/3418	0.101905125339589	0.446528993343826	0.417069334035004	101742584/732996	2
	Metabolism	Xenobiotics biodegradation and metabolism	bmor00980	Metabolism of xenobiotics by cytochrome P450 - Bombyx mori (domestic silkworm)	3/60	67/3418	0.112017970560423	0.446528993343826	0.417069334035004	100141440/100862843/692521	3
	Metabolism	Amino acid metabolism	bmor00380	Tryptophan metabolism - Bombyx mori (domestic silkworm)	2/60	33/3418	0.113204533523787	0.446528993343826	0.417069334035004	101740126/101747228	2
	Metabolism	Global and overview maps	bmor01210	2-Oxocarboxylic acid metabolism - Bombyx mori (domestic silkworm)	2/60	36/3418	0.130722679665161	0.457579887823493	0.427391148004152	101740126/101746807	2
	Metabolism	Lipid metabolism	bmor00564	Glycerophospholipid metabolism - Bombyx mori (domestic silkworm)	3/60	72/3418	0.13134043417328	0.457579887823493	0.427391148004152	100037430/101743589/101745715	3
GO enrichment		ONTOLOGY	ID	Description	GeneRatio	BgRatio	pvalue	p.adjust	qvalue	geneID	Count
	GO:0033176	CC	GO:0033176	proton-transporting V-type ATPase complex	5/66	11/3687	6.70832439450117e-07	2.2808302941304e-05	1.97719034785298e-05	LOC733031/LOC732966/LOC100037424/LOC692859/LOC100037422	5
	GO:0016469	CC	GO:0016469	proton-transporting two-sector ATPase complex	5/66	27/3687	9.38944293829697e-05	0.00159620529951049	0.00138370738038061	LOC733031/LOC732966/LOC100037424/LOC692859/LOC100037422	5
	GO:1904949	CC	GO:1904949	ATPase complex	5/66	32/3687	0.00021855459422358	0.00247695206786723	0.0021472030309685	LOC733031/LOC732966/LOC100037424/LOC692859/LOC100037422	5
	GO:0033178	CC	GO:0033178	proton-transporting two-sector ATPase complex, catalytic domain	3/66	12/3687	0.00107416750679857	0.00913042380778785	0.00791491847114736	LOC733031/LOC100037424/LOC100037422	3
	GO:0022890	MF	GO:0022890	inorganic cation transmembrane transporter activity	11/73	83/4109	1.50142713752375e-07	2.08698372115801e-05	1.64366760318389e-05	LOC101743522/LOC733031/LOC732966/LOC101740111/LOC101740880/LOC101744132/LOC100037424/LOC101745162/LOC692859/LOC101739059/LOC100037422	11
	GO:0015318	MF	GO:0015318	inorganic molecular entity transmembrane transporter activity	11/73	101/4109	1.14701919375056e-06	5.36160275766147e-05	4.22269357665121e-05	LOC101743522/LOC733031/LOC732966/LOC101740111/LOC101740880/LOC101744132/LOC100037424/LOC101745162/LOC692859/LOC101739059/LOC100037422	11
	GO:0022857	MF	GO:0022857	transmembrane transporter activity	20/73	349/4109	1.44007335090145e-06	5.36160275766147e-05	4.22269357665121e-05	LOC101743522/LOC101737684/LOC733031/LOC101739037/LOC732966/LOC101740111/LOC101747092/LOC101740880/LOC101741524/LOC101740873/LOC692464/LOC101739545/LOC101744132/LOC100037424/LOC101745162/LOC101738964/LOC692859/LOC101744983/LOC101739059/LOC100037422	20
	GO:0008324	MF	GO:0008324	monoatomic cation transmembrane transporter activity	11/73	104/4109	1.54290726839179e-06	5.36160275766147e-05	4.22269357665121e-05	LOC733031/LOC732966/LOC101740111/LOC101740880/LOC101740873/LOC101744132/LOC100037424/LOC101745162/LOC692859/LOC101739059/LOC100037422	11
	GO:0005215	MF	GO:0005215	transporter activity	20/73	363/4109	2.6829484746559e-06	7.4585967595434e-05	5.87424508135186e-05	LOC101743522/LOC101737684/LOC733031/LOC101739037/LOC732966/LOC101740111/LOC101747092/LOC101740880/LOC101741524/LOC101740873/LOC692464/LOC101739545/LOC101744132/LOC100037424/LOC101745162/LOC101738964/LOC692859/LOC101744983/LOC101739059/LOC100037422	20
	GO:0042625	MF	GO:0042625	ATPase-coupled ion transmembrane transporter activity	5/73	16/4109	5.7831374670585e-06	0.000100482013490141	7.91376706018532e-05	LOC733031/LOC732966/LOC100037424/LOC692859/LOC100037422	5
	GO:0044769	MF	GO:0044769	ATPase activity, coupled to transmembrane movement of ions, rotational mechanism	5/73	16/4109	5.7831374670585e-06	0.000100482013490141	7.91376706018532e-05	LOC733031/LOC732966/LOC100037424/LOC692859/LOC100037422	5
	GO:0046961	MF	GO:0046961	proton-transporting ATPase activity, rotational mechanism	5/73	16/4109	5.7831374670585e-06	0.000100482013490141	7.91376706018532e-05	LOC733031/LOC732966/LOC100037424/LOC692859/LOC100037422	5
	GO:0015075	MF	GO:0015075	monoatomic ion transmembrane transporter activity	11/73	129/4109	1.29245034181946e-05	0.00019961177501434	0.000157210333975701	LOC733031/LOC732966/LOC101740111/LOC101740880/LOC101740873/LOC101744132/LOC100037424/LOC101745162/LOC692859/LOC101739059/LOC100037422	11
	GO:0019829	MF	GO:0019829	ATPase-coupled monoatomic cation transmembrane transporter activity	5/73	21/4109	2.51368822610749e-05	0.000349402663428941	0.000275182711068609	LOC733031/LOC732966/LOC100037424/LOC692859/LOC100037422	5
	GO:0022853	MF	GO:0022853	active monoatomic ion transmembrane transporter activity	5/73	32/4109	0.000213621412614346	0.00269939785030856	0.00212599300592268	LOC733031/LOC732966/LOC100037424/LOC692859/LOC100037422	5
	GO:0015078	MF	GO:0015078	proton transmembrane transporter activity	5/73	41/4109	0.000702050547450281	0.0074272188026118	0.00584953241553674	LOC733031/LOC732966/LOC100037424/LOC692859/LOC100037422	5
	GO:0042626	MF	GO:0042626	ATPase-coupled transmembrane transporter activity	5/73	41/4109	0.000702050547450281	0.0074272188026118	0.00584953241553674	LOC733031/LOC732966/LOC100037424/LOC692859/LOC100037422	5
	GO:0046873	MF	GO:0046873	metal ion transmembrane transporter activity	5/73	42/4109	0.00078600514461231	0.0074272188026118	0.00584953241553674	LOC101740111/LOC101740880/LOC101744132/LOC101745162/LOC101739059	5
	GO:0005249	MF	GO:0005249	voltage-gated potassium channel activity	3/73	11/4109	0.000801498431936525	0.0074272188026118	0.00584953241553674	LOC101740880/LOC101744132/LOC101745162	3
	GO:0022843	MF	GO:0022843	voltage-gated monoatomic cation channel activity	3/73	12/4109	0.00105507486891914	0.00916596292373506	0.0072189333136573	LOC101740880/LOC101744132/LOC101745162	3
	GO:0005267	MF	GO:0005267	potassium channel activity	3/73	15/4109	0.00210000887948113	0.0171706608381104	0.0135232769948011	LOC101740880/LOC101744132/LOC101745162	3
	GO:0019842	MF	GO:0019842	vitamin binding	4/73	32/4109	0.00226335919998891	0.0174781627110255	0.0137654594619209	LOC692801/LOC101740126/LOC101743589/LOC692954	4
	GO:0015267	MF	GO:0015267	channel activity	6/73	79/4109	0.00254922394859642	0.0177171064427451	0.0139536468765278	LOC101743522/LOC101740880/LOC692464/LOC101744132/LOC100037424/LOC101745162	6
	GO:0022803	MF	GO:0022803	passive transmembrane transporter activity	6/73	79/4109	0.00254922394859642	0.0177171064427451	0.0139536468765278	LOC101743522/LOC101740880/LOC692464/LOC101744132/LOC100037424/LOC101745162	6
	GO:0015079	MF	GO:0015079	potassium ion transmembrane transporter activity	3/73	17/4109	0.00305941135145482	0.0202503894215343	0.0159488110552031	LOC101740880/LOC101744132/LOC101745162	3
	GO:0015399	MF	GO:0015399	primary active transmembrane transporter activity	5/73	59/4109	0.0036609098800102	0.0231302942418826	0.0182169678239742	LOC733031/LOC732966/LOC100037424/LOC692859/LOC100037422	5
	GO:0005244	MF	GO:0005244	voltage-gated monoatomic ion channel activity	3/73	19/4109	0.00424999068985184	0.0246145294120586	0.0193859224449382	LOC101740880/LOC101744132/LOC101745162	3
	GO:0022832	MF	GO:0022832	voltage-gated channel activity	3/73	19/4109	0.00424999068985184	0.0246145294120586	0.0193859224449382	LOC101740880/LOC101744132/LOC101745162	3
	GO:0022804	MF	GO:0022804	active transmembrane transporter activity	6/73	93/4109	0.00575025093842334	0.0319713952176338	0.0251800462145696	LOC733031/LOC101739037/LOC732966/LOC100037424/LOC692859/LOC100037422	6
	GO:0030170	MF	GO:0030170	pyridoxal phosphate binding	3/73	24/4109	0.00833074506853105	0.0428879097972524	0.0337776798100284	LOC692801/LOC101743589/LOC692954	3
	GO:0070279	MF	GO:0070279	vitamin B6 binding	3/73	24/4109	0.00833074506853105	0.0428879097972524	0.0337776798100284	LOC692801/LOC101743589/LOC692954	3

## Sheet: 4-module 4
category	subcategory	ID	Description	GeneRatio	BgRatio	pvalue	p.adjust	qvalue	geneID	Count
Metabolism	Nucleotide metabolism	bmor00230	Purine metabolism - Bombyx mori (domestic silkworm)	2025-03-15	94/3418	0.00721006720047469	0.165831545610918	0.144201344009494	101741402/101737283/101742254	3
NA	NA	bmor04081	Hormone signaling - Bombyx mori (domestic silkworm)	2025-02-15	73/3418	0.0394814869677341	0.231145633795535	0.200996203300465	692605/101741402	2
Environmental Information Processing	Signal transduction	bmor04013	MAPK signaling pathway - fly - Bombyx mori (domestic silkworm)	2025-02-15	77/3418	0.0435176763352078	0.231145633795535	0.200996203300465	101738782/101740276	2
Environmental Information Processing	Signal transduction	bmor04310	Wnt signaling pathway - Bombyx mori (domestic silkworm)	2025-02-15	77/3418	0.0435176763352078	0.231145633795535	0.200996203300465	101741538/101740097	2
Cellular Processes	Transport and catabolism	bmor04140	Autophagy - animal - Bombyx mori (domestic silkworm)	2025-02-15	111/3418	0.0833622448597706	0.231145633795535	0.200996203300465	101739525/101741421	2
Genetic Information Processing	Folding, sorting and degradation	bmor04130	SNARE interactions in vesicular transport - Bombyx mori (domestic silkworm)	2025-01-15	21/3418	0.088472832646847	0.231145633795535	0.200996203300465	101737218	1
Metabolism	Carbohydrate metabolism	bmor00051	Fructose and mannose metabolism - Bombyx mori (domestic silkworm)	2025-01-15	22/3418	0.0924978274982738	0.231145633795535	0.200996203300465	101745054	1
Metabolism	Carbohydrate metabolism	bmor00052	Galactose metabolism - Bombyx mori (domestic silkworm)	2025-01-15	22/3418	0.0924978274982738	0.231145633795535	0.200996203300465	101745054	1
Metabolism	Carbohydrate metabolism	bmor00500	Starch and sucrose metabolism - Bombyx mori (domestic silkworm)	2025-01-15	24/3418	0.100498101650232	0.231145633795535	0.200996203300465	101745054	1
Organismal Systems	Sensory system	bmor04745	Phototransduction - fly - Bombyx mori (domestic silkworm)	2025-01-15	24/3418	0.100498101650232	0.231145633795535	0.200996203300465	101741421	1
Metabolism	Global and overview maps	bmor01250	Biosynthesis of nucleotide sugars - Bombyx mori (domestic silkworm)	2025-01-15	27/3418	0.112375173696211	0.234966272273895	0.204318497629474	101745054	1
Metabolism	Glycan biosynthesis and metabolism	bmor00510	N-Glycan biosynthesis - Bombyx mori (domestic silkworm)	2025-01-15	35/3418	0.143335699074227	0.260314163420859	0.226360142105095	101735304	1
Metabolism	Carbohydrate metabolism	bmor00520	Amino sugar and nucleotide sugar metabolism - Bombyx mori (domestic silkworm)	2025-01-15	36/3418	0.147134092368312	0.260314163420859	0.226360142105095	101745054	1
Metabolism	Glycan biosynthesis and metabolism	bmor00513	Various types of N-glycan biosynthesis - Bombyx mori (domestic silkworm)	2025-01-15	44/3418	0.176960237524716	0.270094534880095	0.234864812939213	101735304	1
Metabolism	Carbohydrate metabolism	bmor00010	Glycolysis / Gluconeogenesis - Bombyx mori (domestic silkworm)	2025-01-15	46/3418	0.18426312760942	0.270094534880095	0.234864812939213	101745054	1
Environmental Information Processing	Signal transduction	bmor04070	Phosphatidylinositol signaling system - Bombyx mori (domestic silkworm)	2025-01-15	47/3418	0.187891850351371	0.270094534880095	0.234864812939213	101741421	1
Environmental Information Processing	Signal transduction	bmor04391	Hippo signaling pathway - fly - Bombyx mori (domestic silkworm)	2025-01-15	55/3418	0.216383957344234	0.280956656611746	0.244310136184127	101740701	1
Cellular Processes	Transport and catabolism	bmor04137	Mitophagy - animal - Bombyx mori (domestic silkworm)	2025-01-15	56/3418	0.219879122565715	0.280956656611746	0.244310136184127	101739525	1
Cellular Processes	Transport and catabolism	bmor04148	Efferocytosis - Bombyx mori (domestic silkworm)	2025-01-15	69/3418	0.264012100248871	0.319593595038107	0.27790747394618	101739525	1
Organismal Systems	Aging	bmor04213	Longevity regulating pathway - multiple species - Bombyx mori (domestic silkworm)	2025-01-15	81/3418	0.302671437592135	0.348072153230955	0.302671437592135	101741402	1

## Sheet: 5-module 5
KEGG enrichment	category	subcategory	ID	Description	GeneRatio	BgRatio	pvalue	p.adjust	qvalue	geneID	Count
	Cellular Processes	Cell motility	bmor04814	Motor proteins - Bombyx mori (domestic silkworm)	11/107	105/3418	0.000357329888147879	0.0181586677199151	0.0152915096588759	101737161/101743647/100144601/101741734/100144600/101738291/101746355/101742699/101744080/101737198/101739780	11
	Human Diseases	Infectious disease: bacterial	bmor05100	Bacterial invasion of epithelial cells - Bombyx mori (domestic silkworm)	6/107	37/3418	0.000862348128379452	0.0181586677199151	0.0152915096588759	101739651/101742617/101741145/100233163/101736734/101736001	6
	Cellular Processes	Transport and catabolism	bmor04144	Endocytosis - Bombyx mori (domestic silkworm)	11/107	117/3418	0.000907933385995756	0.0181586677199151	0.0152915096588759	733058/101742207/101741546/101740393/101745630/101741262/100144600/101737965/101746390/100233163/101740542	11
	Environmental Information Processing	Signal transduction	bmor04391	Hippo signaling pathway - fly - Bombyx mori (domestic silkworm)	7/107	55/3418	0.00142260523767117	0.0213390785650675	0.0179697503705832	101745221/100144579/101745685/101741262/101744274/101747103/101737806	7
	Environmental Information Processing	Signal transduction	bmor04013	MAPK signaling pathway - fly - Bombyx mori (domestic silkworm)	8/107	77/3418	0.00248119538193112	0.0276484522304274	0.0232829071414125	692449/101742601/101739651/100529210/100862753/101738615/101736734/101743676	8
	Cellular Processes	Cell growth and death	bmor04214	Apoptosis - fly - Bombyx mori (domestic silkworm)	6/107	46/3418	0.00276484522304274	0.0276484522304274	0.0232829071414125	693034/692756/100529210/693011/100862753/100862752	6
	Cellular Processes	Transport and catabolism	bmor04145	Phagosome - Bombyx mori (domestic silkworm)	7/107	76/3418	0.0089471096697766	0.0694297419976272	0.0584671511558966	101745433/733058/101737161/101739651/101738141/101741734/101736734	7
	Environmental Information Processing	Signal transduction	bmor04310	Wnt signaling pathway - Bombyx mori (domestic silkworm)	7/107	77/3418	0.00959370109856111	0.0694297419976272	0.0584671511558966	101739651/101744944/101736734/100862751/692578/101743676/692729	7
	Genetic Information Processing	Information processing in viruses	bmor03250	Viral life cycle - HIV-1 - Bombyx mori (domestic silkworm)	4/107	28/3418	0.0104144612996441	0.0694297419976272	0.0584671511558966	101747230/101742207/101744944/101740554	4
	Environmental Information Processing	Signal transduction	bmor04070	Phosphatidylinositol signaling system - Bombyx mori (domestic silkworm)	5/107	47/3418	0.0147616827071659	0.0885700962429955	0.0745853442046278	101740114/101746775/101745288/101741396/101740354	5
	Metabolism	Amino acid metabolism	bmor00310	Lysine degradation - Bombyx mori (domestic silkworm)	4/107	39/3418	0.0322009484847208	0.175641537189386	0.147908662896325	101736339/101736107/101737263/101737053	4
	Environmental Information Processing	Signal transduction	bmor04330	Notch signaling pathway - Bombyx mori (domestic silkworm)	3/107	25/3418	0.041607729397013	0.208038646985065	0.17519043956637	101736421/101744944/101743676	3
	Organismal Systems	Environmental adaptation	bmor04711	Circadian rhythm - fly - Bombyx mori (domestic silkworm)	2/107	12/3418	0.0522266102306783	0.241045893372361	0.202986015471462	100862751/101746519	2
	Organismal Systems	Immune system	bmor04620	Toll-like receptor signaling pathway - Bombyx mori (domestic silkworm)	3/107	29/3418	0.0604570424662568	0.241954513731595	0.203751169458186	101739651/100862753/101736734	3
	Environmental Information Processing	Signal transduction	bmor04392	Hippo signaling pathway - multiple species - Bombyx mori (domestic silkworm)	2/107	13/3418	0.0604886284328989	0.241954513731595	0.203751169458186	100144579/101747103	2
	Environmental Information Processing	Signal transduction	bmor04341	Hedgehog signaling pathway - fly - Bombyx mori (domestic silkworm)	3/107	31/3418	0.0711409088626465	0.266778408234925	0.224655501671515	100862751/101739040/692729	3
	Cellular Processes	Transport and catabolism	bmor04142	Lysosome - Bombyx mori (domestic silkworm)	7/107	119/3418	0.0772101517617969	0.272506417982813	0.229479088827632	101745433/100500932/101738141/692367/100271726/100233163/101742988	7
	Environmental Information Processing	Signal transduction	bmor04068	FoxO signaling pathway - Bombyx mori (domestic silkworm)	5/107	78/3418	0.0956147729781475	0.318715909927158	0.268392345201818	100145904/101741938/101739346/101744944/101739310	5
	Genetic Information Processing	Chromosome	bmor03083	Polycomb repressive complex - Bombyx mori (domestic silkworm)	3/107	38/3418	0.114427336013596	0.361349482148198	0.304294300756377	101745326/101744944/101739310	3
	Cellular Processes	Transport and catabolism	bmor04140	Autophagy - animal - Bombyx mori (domestic silkworm)	6/107	111/3418	0.132501590496722	0.39696157322953	0.334283430088025	101745433/101742845/101741938/101746532/101740354/100862752	6
GO enrichment		ONTOLOGY	ID	Description	GeneRatio	BgRatio	pvalue	p.adjust	qvalue	geneID	Count
	GO:0016310	BP	GO:0016310	phosphorylation	16/65	169/2885	4.96672677150434e-07	0.000113738043067449	0.000100902975463193	Snf4agamma/LOC101739790/rock1/LOC101742601/LOC101737313/LOC101746775/LOC101742556/CDC2L1/ask1/LOC101736804/LOC101741803/LOC100862753/Gklp/LOC101741339/LOC101740283/CKIalpha	16
	GO:0006468	BP	GO:0006468	protein phosphorylation	12/65	117/2885	7.34800935524965e-06	0.000841347071176085	0.00074640305555957	LOC101739790/rock1/LOC101742601/LOC101737313/LOC101742556/CDC2L1/ask1/LOC101741803/LOC100862753/LOC101741339/LOC101740283/CKIalpha	12
	GO:0006796	BP	GO:0006796	phosphate-containing compound metabolic process	18/65	311/2885	0.000102900734207978	0.00726854563391327	0.00644830754927723	Snf4agamma/LOC101739790/rock1/LOC101742601/LOC101737313/LOC101746775/LOC101742556/CDC2L1/ask1/LOC101736804/LOC101746390/LOC101735515/LOC101741803/LOC100862753/Gklp/LOC101741339/LOC101740283/CKIalpha	18
	GO:0006793	BP	GO:0006793	phosphorus metabolic process	18/65	316/2885	0.000126961495788878	0.00726854563391327	0.00644830754927723	Snf4agamma/LOC101739790/rock1/LOC101742601/LOC101737313/LOC101746775/LOC101742556/CDC2L1/ask1/LOC101736804/LOC101746390/LOC101735515/LOC101741803/LOC100862753/Gklp/LOC101741339/LOC101740283/CKIalpha	18
	GO:0036211	BP	GO:0036211	protein modification process	17/65	298/2885	0.000202971257627419	0.00865652804336147	0.00767965944550109	LOC101739790/rock1/LOC101742601/LOC101737313/LOC101743894/LOC101742556/CDC2L1/LOC101746408/LOC101743046/ask1/LOC101741803/LOC100862753/LOC101739310/LOC101737508/LOC101741339/LOC101740283/CKIalpha	17
	GO:0007264	BP	GO:0007264	small GTPase mediated signal transduction	5/65	26/2885	0.000226808595022571	0.00865652804336147	0.00767965944550109	LOC101747001/rock1/LOC101739651/LOC692865/LOC101736734	5
	GO:0007018	BP	GO:0007018	microtubule-based movement	4/65	16/2885	0.000348660980213383	0.0114061949241235	0.0101190329595764	MCAK/LOC101741734/Khc/LOC101744080	4
	GO:0043412	BP	GO:0043412	macromolecule modification	17/65	327/2885	0.000622253615203832	0.0178120097352097	0.0158019668071499	LOC101739790/rock1/LOC101742601/LOC101737313/LOC101743894/LOC101742556/CDC2L1/LOC101746408/LOC101743046/ask1/LOC101741803/LOC100862753/LOC101739310/LOC101737508/LOC101741339/LOC101740283/CKIalpha	17
	GO:0035556	BP	GO:0035556	intracellular signal transduction	7/65	73/2885	0.00107009812017514	0.0272280521689007	0.024155431250737	LOC101747001/rock1/LOC101739651/LOC692865/ask1/LOC101736734/LOC101742699	7
	GO:0005856	CC	GO:0005856	cytoskeleton	11/66	117/3687	5.04601313898027e-06	0.000307806801477797	0.000276202824449447	rock1/LOC101737740/MCAK/LOC692865/LOC101741026/LOC101741734/Khc/LOC101742617/gas2/LOC101742699/LOC101744080	11
	GO:0005524	MF	GO:0005524	ATP binding	23/92	382/4109	6.51867654117433e-06	0.000303432744242895	0.000251584467108384	LOC101739790/rock1/CHD1/LOC101742601/MCAK/LOC101737313/DnaJ-2/LOC101746775/LOC101742556/CDC2L1/Khc/ask1/LOC101735515/LOC101741803/LOC100862753/LOC101745237/LOC101742699/Gklp/LOC101741339/LOC101740283/LOC101744080/CKIalpha/LOC101744319	23
	GO:0004672	MF	GO:0004672	protein kinase activity	12/92	117/4109	8.56250248936868e-06	0.000303432744242895	0.000251584467108384	LOC101739790/rock1/LOC101742601/LOC101737313/LOC101742556/CDC2L1/ask1/LOC101741803/LOC100862753/LOC101741339/LOC101740283/CKIalpha	12
	GO:0032559	MF	GO:0032559	adenyl ribonucleotide binding	23/92	390/4109	9.25372264090832e-06	0.000303432744242895	0.000251584467108384	LOC101739790/rock1/CHD1/LOC101742601/MCAK/LOC101737313/DnaJ-2/LOC101746775/LOC101742556/CDC2L1/Khc/ask1/LOC101735515/LOC101741803/LOC100862753/LOC101745237/LOC101742699/Gklp/LOC101741339/LOC101740283/LOC101744080/CKIalpha/LOC101744319	23
	GO:0030554	MF	GO:0030554	adenyl nucleotide binding	24/92	421/4109	1.0091398685602e-05	0.000303432744242895	0.000251584467108384	LOC101739790/rock1/CHD1/LOC101742601/MCAK/LOC101737313/DnaJ-2/LOC101746775/LOC101742556/Cpr/CDC2L1/Khc/ask1/LOC101735515/LOC101741803/LOC100862753/LOC101745237/LOC101742699/Gklp/LOC101741339/LOC101740283/LOC101744080/CKIalpha/LOC101744319	24
	GO:0016301	MF	GO:0016301	kinase activity	15/92	184/4109	1.03915323370854e-05	0.000303432744242895	0.000251584467108384	Snf4agamma/LOC101739790/rock1/LOC101742601/LOC101737313/LOC101746775/LOC101742556/CDC2L1/ask1/LOC101741803/LOC100862753/Gklp/LOC101741339/LOC101740283/CKIalpha	15
	GO:0016773	MF	GO:0016773	phosphotransferase activity, alcohol group as acceptor	13/92	143/4109	1.33443954468393e-05	0.000324713622539756	0.000269229030945003	LOC101739790/rock1/LOC101742601/LOC101737313/LOC101742556/CDC2L1/ask1/LOC101741803/LOC100862753/Gklp/LOC101741339/LOC101740283/CKIalpha	13
	GO:0008017	MF	GO:0008017	microtubule binding	5/92	17/4109	2.52432138259181e-05	0.000526501316940577	0.000436536780448207	LOC101737740/MCAK/Khc/gas2/LOC101744080	5
	GO:0016772	MF	GO:0016772	transferase activity, transferring phosphorus-containing groups	16/92	230/4109	3.8073550469287e-05	0.000694842296064487	0.000576112934732632	Snf4agamma/LOC101739790/rock1/LOC101742601/LOC101737313/LOC101739491/LOC101746775/LOC101742556/CDC2L1/ask1/LOC101741803/LOC100862753/Gklp/LOC101741339/LOC101740283/CKIalpha	16
	GO:0005515	MF	GO:0005515	protein binding	19/92	315/4109	4.83963012269607e-05	0.000785095553237363	0.000650944402467893	LOC101741527/LOC101745835/rock1/LOC101737740/Mef2/MCAK/LOC692865/DnaJ-2/Gq/LOC101741026/Khc/LOC101741938/gas2/Chc/LOC101742699/LOC101746519/LOC101745438/LOC101744080/LOC101745417	19
	GO:0008092	MF	GO:0008092	cytoskeletal protein binding	8/92	64/4109	7.36144163922415e-05	0.00107477047932673	0.000891121882642923	LOC101737740/MCAK/LOC101741026/Khc/gas2/LOC101742699/LOC101744080/LOC101745417	8
	GO:0015631	MF	GO:0015631	tubulin binding	5/92	26/4109	0.000228763261412401	0.00303631237874642	0.00251749043659581	LOC101737740/MCAK/Khc/gas2/LOC101744080	5
	GO:0004842	MF	GO:0004842	ubiquitin-protein transferase activity	5/92	29/4109	0.000391645117264397	0.00476501559338349	0.00395080600749172	LOC101743894/LOC101743046/LOC101736311/LOC101740542/LOC100862752	5
	GO:0019787	MF	GO:0019787	ubiquitin-like protein transferase activity	5/92	33/4109	0.00072930396752937	0.00814878239401956	0.00675638049972782	LOC101743894/LOC101743046/LOC101736311/LOC101740542/LOC100862752	5
	GO:0004674	MF	GO:0004674	protein serine/threonine kinase activity	7/92	69/4109	0.000781390092577218	0.00814878239401956	0.00675638049972782	rock1/LOC101737313/CDC2L1/ask1/LOC101741339/LOC101740283/CKIalpha	7
	GO:0003677	MF	GO:0003677	DNA binding	17/92	336/4109	0.00103621069749597	0.0100257871147505	0.00831265694445784	LOC101744602/LOC101745407/USP/Mef2/CHD1/LOC101736630/LOC100529235/EcR/CREB/Dorsal/E74/LOC101742841/LOC101740596/LOC101746519/LOC101740963/LOC101737806/LOC101746976	17
	GO:0016755	MF	GO:0016755	aminoacyltransferase activity	5/92	36/4109	0.00109871639613704	0.0100257871147505	0.00831265694445784	LOC101743894/LOC101743046/LOC101736311/LOC101740542/LOC100862752	5
	GO:0003700	MF	GO:0003700	DNA-binding transcription factor activity	9/92	123/4109	0.00153955805984322	0.0132220868668889	0.010962797330153	USP/LOC100529235/EcR/CREB/Dorsal/LOC101743362/E74/LOC101742841/LOC101740596	9
	GO:0140110	MF	GO:0140110	transcription regulator activity	10/92	151/4109	0.00180165883382206	0.0146134549854456	0.0121164190578677	USP/LOC101741527/LOC100529235/EcR/CREB/Dorsal/LOC101743362/E74/LOC101742841/LOC101740596	10
	GO:0043565	MF	GO:0043565	sequence-specific DNA binding	6/92	63/4109	0.00260343130123075	0.0200053142094573	0.0165869584288939	USP/Mef2/LOC100529235/EcR/Dorsal/E74	6

## Sheet: 6-module 6
KEGG enrichment	category	subcategory	ID	Description	GeneRatio	BgRatio	pvalue	p.adjust	qvalue	geneID	Count
	Metabolism	Carbohydrate metabolism	bmor00520	Amino sugar and nucleotide sugar metabolism - Bombyx mori (domestic silkworm)	6/47	36/3418	6.95183594008178e-06	0.000403206484524743	0.000373203824151759	100884166/101743162/101746744/101743496/101736080/692816	6
	Metabolism	Global and overview maps	bmor01250	Biosynthesis of nucleotide sugars - Bombyx mori (domestic silkworm)	3/47	27/3418	0.00565658179777276	0.16404087213541	0.151834564045479	101746744/101743496/692816	3
	Environmental Information Processing	Membrane transport	bmor02010	ABC transporters - Bombyx mori (domestic silkworm)	3/47	40/3418	0.0168695170329395	0.285568571702058	0.264319367637114	101735894/101746447/101735553	3
	Metabolism	Carbohydrate metabolism	bmor00010	Glycolysis / Gluconeogenesis - Bombyx mori (domestic silkworm)	3/47	46/3418	0.0244779013656033	0.285568571702058	0.264319367637114	692988/733130/101738228	3
	Metabolism	Metabolism of cofactors and vitamins	bmor00770	Pantothenate and CoA biosynthesis - Bombyx mori (domestic silkworm)	2/47	18/3418	0.024617980319143	0.285568571702058	0.264319367637114	692988/101742594	2
	Environmental Information Processing	Signal transduction	bmor04330	Notch signaling pathway - Bombyx mori (domestic silkworm)	2/47	25/3418	0.0454291560833066	0.376413007547398	0.348404054172728	101745094/101737017	2
	Organismal Systems	Digestive system	bmor04977	Vitamin digestion and absorption - Bombyx mori (domestic silkworm)	2/47	25/3418	0.0454291560833066	0.376413007547398	0.348404054172728	101737746/101744837	2
	Metabolism	Amino acid metabolism	bmor00250	Alanine, aspartate and glutamate metabolism - Bombyx mori (domestic silkworm)	2/47	30/3418	0.0630947001555489	0.432896723269451	0.400684807381888	101737836/101743496	2
	NA	NA	bmor03272	Virion - Hepatitis viruses - Bombyx mori (domestic silkworm)	2/47	32/3418	0.0707175805927104	0.432896723269451	0.400684807381888	101745874/101744837	2
	Metabolism	Metabolism of other amino acids	bmor00410	beta-Alanine metabolism - Bombyx mori (domestic silkworm)	2/47	33/3418	0.0746373660809398	0.432896723269451	0.400684807381888	692988/101742594	2
	Metabolism	Amino acid metabolism	bmor00260	Glycine, serine and threonine metabolism - Bombyx mori (domestic silkworm)	2/47	37/3418	0.0909789628132594	0.443981185341317	0.410944472820457	693077/101737836	2
	Genetic Information Processing	Chromosome	bmor03083	Polycomb repressive complex - Bombyx mori (domestic silkworm)	2/47	38/3418	0.0952176924276674	0.443981185341317	0.410944472820457	100529126/101735345	2
	Metabolism	Carbohydrate metabolism	bmor00620	Pyruvate metabolism - Bombyx mori (domestic silkworm)	2/47	39/3418	0.09951302430064	0.443981185341317	0.410944472820457	692988/733130	2
	Metabolism	Amino acid metabolism	bmor00340	Histidine metabolism - Bombyx mori (domestic silkworm)	1/47	11/3418	0.141468964534303	0.56106331224144	0.519314499533819	692988	1
	Metabolism	Lipid metabolism	bmor00561	Glycerolipid metabolism - Bombyx mori (domestic silkworm)	2/47	49/3418	0.145102580752097	0.56106331224144	0.519314499533819	692988/101737746	2
	Metabolism	Metabolism of cofactors and vitamins	bmor00830	Retinol metabolism - Bombyx mori (domestic silkworm)	2/47	54/3418	0.169300140576825	0.594408620913573	0.550178578341057	101745197/101745050	2
	Environmental Information Processing	Signal transduction	bmor04391	Hippo signaling pathway - fly - Bombyx mori (domestic silkworm)	2/47	55/3418	0.174223216474668	0.594408620913573	0.550178578341057	692948/101745387	2
	Cellular Processes	Transport and catabolism	bmor04146	Peroxisome - Bombyx mori (domestic silkworm)	3/47	109/3418	0.187835367521236	0.605247295346204	0.560210745238773	101737836/101740425/101735553	3
	Organismal Systems	Development and regeneration	bmor04320	Dorso-ventral axis formation - Bombyx mori (domestic silkworm)	1/47	22/3418	0.263290434867934	0.669515704840556	0.619696931885088	101735954	1
	Metabolism	Metabolism of terpenoids and polyketides	bmor00900	Terpenoid backbone biosynthesis - Bombyx mori (domestic silkworm)	1/47	26/3418	0.303252536056466	0.669515704840556	0.619696931885088	101741344	1
GO enrichment		ONTOLOGY	ID	Description	GeneRatio	BgRatio	pvalue	p.adjust	qvalue	geneID	Count
	GO:0006040	BP	GO:0006040	amino sugar metabolic process	3/44	10/2885	0.000368806977401106	0.0400257323064487	0.0374272142860194	LOC101740647/LOC101736080/LOC692816	3
	GO:0065009	BP	GO:0065009	regulation of molecular function	6/44	66/2885	0.00040635261224821	0.0400257323064487	0.0374272142860194	LOC101743136/serpin-13/serpin-6/LOC692390/LOC101736335/LOC101741191	6
	GO:0005576	CC	GO:0005576	extracellular region	17/69	270/3687	5.58712735237479e-06	0.000145265311161745	0.000141148480481047	LOC101740962/LOC101743559/LOC101740647/LOC732885/LOC101739739/serpin-13/LOC733010/LOC101740197/LOC101740062/LOC101739926/serpin-6/LOC101736080/Adamts-like/LOC101741202/LOC101736335/LOC101739682/LOC101741191	17
	GO:0008061	MF	GO:0008061	chitin binding	8/91	30/4109	1.6668428438624e-07	2.0168798410735e-05	1.8422999853216e-05	LOC101740962/LOC101740647/LOC732885/LOC733010/LOC101740197/LOC101740062/LOC101739926/LOC101736080	8
	GO:0042302	MF	GO:0042302	structural constituent of cuticle	15/91	152/4109	8.05588908682502e-07	4.87381289752913e-05	4.45193870587698e-05	CPR67/CPR70/CPR71/CPH28/CPR54/CPR55/CPR140/CPH31/CPR130/CPR128/CPR91/CPR36/CPR34/CPR25/CPR78	15
	GO:0140359	MF	GO:0140359	ABC-type transporter activity	4/91	20/4109	0.000831367862268844	0.03353183711151	0.0306293422941153	wh3/LOC101746447/LOC101739337/LOC101735553	4

## Sheet: 7-module 7
KEGG enrichment	category	subcategory	ID	Description	GeneRatio	BgRatio	pvalue	p.adjust	qvalue	geneID	Count
	Metabolism	Global and overview maps	bmor01200	Carbon metabolism - Bombyx mori (domestic silkworm)	15/65	116/3418	1.83922971197391e-09	1.48977606669886e-07	1.0648172016691e-07	100146104/733113/692786/101744429/732869/101745880/100037426/692952/733132/101739645/101736083/693076/100174823/101737640/732915	15
	Cellular Processes	Transport and catabolism	bmor04145	Phagosome - Bombyx mori (domestic silkworm)	10/65	76/3418	1.08363463480037e-06	4.38872027094151e-05	3.13683710073792e-05	732990/732987/101742516/778463/100145916/692984/692985/692431/101746782/692428	10
	Metabolism	Carbohydrate metabolism	bmor00010	Glycolysis / Gluconeogenesis - Bombyx mori (domestic silkworm)	8/65	46/3418	1.62606904054156e-06	4.39038640946221e-05	3.13802797297494e-05	100146104/692786/101744429/100037426/692889/101739645/693076/732915	8
	Metabolism	Global and overview maps	bmor01230	Biosynthesis of amino acids - Bombyx mori (domestic silkworm)	9/65	69/3418	4.25709578635854e-06	8.62061896737604e-05	6.16158600657157e-05	100146104/692786/732869/100037426/733132/101739645/101736083/693076/101737640	9
	Metabolism	Carbohydrate metabolism	bmor00620	Pyruvate metabolism - Bombyx mori (domestic silkworm)	5/65	39/3418	0.000744019195837802	0.0120531109725724	0.00861495910970086	101744429/101744454/692952/692889/101737640	5
	Metabolism	Amino acid metabolism	bmor00360	Phenylalanine metabolism - Bombyx mori (domestic silkworm)	3/65	12/3418	0.00127786341457563	0.0152572253039582	0.0109050993075724	732869/101737290/101736083	3
	Metabolism	Carbohydrate metabolism	bmor00030	Pentose phosphate pathway - Bombyx mori (domestic silkworm)	4/65	27/3418	0.00150511606293689	0.0152572253039582	0.0109050993075724	733113/101745880/733132/732915	4
	Metabolism	Xenobiotics biodegradation and metabolism	bmor00980	Metabolism of xenobiotics by cytochrome P450 - Bombyx mori (domestic silkworm)	6/65	67/3418	0.00150688644977365	0.0152572253039582	0.0109050993075724	101742796/692593/100141444/692684/100862820/100862815	6
	Metabolism	Amino acid metabolism	bmor00330	Arginine and proline metabolism - Bombyx mori (domestic silkworm)	4/65	31/3418	0.00254889244054441	0.0224910668985518	0.0160754864122203	732869/692924/692889/101736083	4
	Metabolism	Carbohydrate metabolism	bmor00053	Ascorbate and aldarate metabolism - Bombyx mori (domestic silkworm)	5/65	52/3418	0.00277667492574714	0.0224910668985518	0.0160754864122203	101745880/692593/692889/100862820/100862815	5
	Metabolism	Xenobiotics biodegradation and metabolism	bmor00982	Drug metabolism - cytochrome P450 - Bombyx mori (domestic silkworm)	5/65	62/3418	0.00597495502764099	0.0439973961126291	0.0314471317244263	692593/100141444/692684/100862820/100862815	5
	Metabolism	Carbohydrate metabolism	bmor00051	Fructose and mannose metabolism - Bombyx mori (domestic silkworm)	3/65	22/3418	0.00780938963414145	0.0527133800304548	0.0376768798138403	100146104/101743996/732915	3
	Metabolism	Energy metabolism	bmor00190	Oxidative phosphorylation - Bombyx mori (domestic silkworm)	7/65	131/3418	0.0112910337467081	0.0703518256525655	0.0502839559569994	732990/732987/101742516/778463/692984/692985/101746782	7
	Metabolism	Metabolism of other amino acids	bmor00480	Glutathione metabolism - Bombyx mori (domestic silkworm)	4/65	55/3418	0.0196643657485888	0.106187575042379	0.075897552012097	733113/100141444/692684/101738819	4
	Metabolism	Metabolism of cofactors and vitamins	bmor00860	Porphyrin metabolism - Bombyx mori (domestic silkworm)	4/65	55/3418	0.0196643657485888	0.106187575042379	0.075897552012097	692593/100862820/100862815/101736226	4
	Cellular Processes	Transport and catabolism	bmor04142	Lysosome - Bombyx mori (domestic silkworm)	6/65	119/3418	0.0242937302516028	0.115684519710605	0.0826854916709977	101742516/100302607/101736903/778463/101745028/692768	6
	Metabolism	Global and overview maps	bmor01240	Biosynthesis of cofactors - Bombyx mori (domestic silkworm)	7/65	154/3418	0.0254936585533595	0.115684519710605	0.0826854916709977	101736367/101745880/692593/101737290/692889/100862820/100862815	7
	Metabolism	Xenobiotics biodegradation and metabolism	bmor00983	Drug metabolism - other enzymes - Bombyx mori (domestic silkworm)	5/65	91/3418	0.0281953438673162	0.115684519710605	0.0826854916709977	692593/100141444/692684/100862820/100862815	5
	Metabolism	Carbohydrate metabolism	bmor00020	Citrate cycle (TCA cycle) - Bombyx mori (domestic silkworm)	3/65	36/3418	0.0299922828879346	0.115684519710605	0.0826854916709977	101744429/692952/101737640	3
	Metabolism	Amino acid metabolism	bmor00350	Tyrosine metabolism - Bombyx mori (domestic silkworm)	3/65	36/3418	0.0299922828879346	0.115684519710605	0.0826854916709977	732869/101737290/101736083	3
GO enrichment		ONTOLOGY	ID	Description	GeneRatio	BgRatio	pvalue	p.adjust	qvalue	geneID	Count
	GO:0005975	BP	GO:0005975	carbohydrate metabolic process	13/56	115/2885	1.45022017314592e-07	2.74091612724579e-05	2.35088322804707e-05	Idgf/Tpi/LOC733113/LOC692786/LOC101743996/LOC100037426/Gal/ChiR1/LOC733132/LOC101739645/Pglym/LOC101745028/LOC732915	13
	GO:0016052	BP	GO:0016052	carbohydrate catabolic process	6/56	17/2885	4.27676147905705e-07	3.39209014694854e-05	2.90939505781161e-05	Tpi/LOC692786/LOC101743996/LOC100037426/LOC101739645/Pglym	6
	GO:0006090	BP	GO:0006090	pyruvate metabolic process	5/56	10/2885	5.3842700745215e-07	3.39209014694854e-05	2.90939505781161e-05	Tpi/LOC692786/LOC100037426/LOC101739645/Pglym	5
	GO:0019752	BP	GO:0019752	carboxylic acid metabolic process	13/56	160/2885	6.79576632887815e-06	0.000229514873942177	0.000196854862640464	Tpi/LOC733113/3HCD/LOC692786/LOC732869/LOC101743996/LOC101737290/LOC100037426/LOC692952/LOC101739645/LOC101736083/Pglym/hibadh	13
	GO:0043436	BP	GO:0043436	oxoacid metabolic process	13/56	160/2885	6.79576632887815e-06	0.000229514873942177	0.000196854862640464	Tpi/LOC733113/3HCD/LOC692786/LOC732869/LOC101743996/LOC101737290/LOC100037426/LOC692952/LOC101739645/LOC101736083/Pglym/hibadh	13
	GO:0006082	BP	GO:0006082	organic acid metabolic process	13/56	161/2885	7.28618647435483e-06	0.000229514873942177	0.000196854862640464	Tpi/LOC733113/3HCD/LOC692786/LOC732869/LOC101743996/LOC101737290/LOC100037426/LOC692952/LOC101739645/LOC101736083/Pglym/hibadh	13
	GO:0010466	BP	GO:0010466	negative regulation of peptidase activity	6/56	38/2885	6.96368101879366e-05	0.001316135712552	0.00112884934409918	serpin-11/serpin-10/serpin-12/serpin-32/serpin-5/serpin-4	6
	GO:0043086	BP	GO:0043086	negative regulation of catalytic activity	6/56	38/2885	6.96368101879366e-05	0.001316135712552	0.00112884934409918	serpin-11/serpin-10/serpin-12/serpin-32/serpin-5/serpin-4	6
	GO:0045861	BP	GO:0045861	negative regulation of proteolysis	6/56	38/2885	6.96368101879366e-05	0.001316135712552	0.00112884934409918	serpin-11/serpin-10/serpin-12/serpin-32/serpin-5/serpin-4	6
	GO:0051346	BP	GO:0051346	negative regulation of hydrolase activity	6/56	38/2885	6.96368101879366e-05	0.001316135712552	0.00112884934409918	serpin-11/serpin-10/serpin-12/serpin-32/serpin-5/serpin-4	6
	GO:0052547	BP	GO:0052547	regulation of peptidase activity	6/56	39/2885	8.10741703670909e-05	0.0013402217170676	0.00114950790547708	serpin-11/serpin-10/serpin-12/serpin-32/serpin-5/serpin-4	6
	GO:0006508	BP	GO:0006508	proteolysis	16/56	294/2885	8.50934423534984e-05	0.0013402217170676	0.00114950790547708	SPI37/LOC101738162/LOC101746072/serpin-11/serpin-10/serpin-12/LOC692400/LOC101739932/LOC101736625/LOC101740827/Tinag/CatD/CLIP11/serpin-32/serpin-5/serpin-4	16
	GO:0044092	BP	GO:0044092	negative regulation of molecular function	6/56	40/2885	9.39630081928904e-05	0.00136607758065048	0.00117168447463199	serpin-11/serpin-10/serpin-12/serpin-32/serpin-5/serpin-4	6
	GO:0030162	BP	GO:0030162	regulation of proteolysis	6/56	41/2885	0.000108434231581536	0.00146386212635074	0.00125555426041779	serpin-11/serpin-10/serpin-12/serpin-32/serpin-5/serpin-4	6
	GO:0006091	BP	GO:0006091	generation of precursor metabolites and energy	8/56	80/2885	0.000118629028438401	0.00149472575832385	0.00128202599154482	Tpi/LOC733113/LOC692786/LOC100037426/LOC692952/LOC733132/LOC101739645/Pglym	8
	GO:0051336	BP	GO:0051336	regulation of hydrolase activity	6/56	44/2885	0.000162754230860267	0.00192253435203691	0.00164895733897903	serpin-11/serpin-10/serpin-12/serpin-32/serpin-5/serpin-4	6
	GO:0051248	BP	GO:0051248	negative regulation of protein metabolic process	6/56	48/2885	0.000266481614211205	0.00296264853446575	0.00254106307049694	serpin-11/serpin-10/serpin-12/serpin-32/serpin-5/serpin-4	6
	GO:0044281	BP	GO:0044281	small molecule metabolic process	15/56	295/2885	0.000324922067720047	0.00327371225104249	0.00280786235956861	Tpi/LOC733113/3HCD/LOC692786/LOC732869/LOC101743996/LOC101737290/LOC100037426/LOC692952/LOC733132/LOC101739645/LOC101736083/Pglym/hibadh/LOC732915	15
	GO:0032787	BP	GO:0032787	monocarboxylic acid metabolic process	7/56	70/2885	0.000329103347988399	0.00327371225104249	0.00280786235956861	Tpi/LOC733113/3HCD/LOC692786/LOC100037426/LOC101739645/Pglym	7
	GO:0050790	BP	GO:0050790	regulation of catalytic activity	6/56	55/2885	0.000566891875697731	0.00535712822534356	0.00459480783460266	serpin-11/serpin-10/serpin-12/serpin-32/serpin-5/serpin-4	6
	GO:0009892	BP	GO:0009892	negative regulation of metabolic process	7/56	82/2885	0.00087127932699361	0.00746485188284598	0.00640260200478017	serpin-11/serpin-10/serpin-12/Cbp20/serpin-32/serpin-5/serpin-4	7
	GO:0010605	BP	GO:0010605	negative regulation of macromolecule metabolic process	7/56	82/2885	0.00087127932699361	0.00746485188284598	0.00640260200478017	serpin-11/serpin-10/serpin-12/Cbp20/serpin-32/serpin-5/serpin-4	7
	GO:0051172	BP	GO:0051172	negative regulation of nitrogen compound metabolic process	6/56	60/2885	0.000908421128600304	0.00746485188284598	0.00640260200478017	serpin-11/serpin-10/serpin-12/serpin-32/serpin-5/serpin-4	6
	GO:0065009	BP	GO:0065009	regulation of molecular function	6/56	66/2885	0.00150714546364008	0.0118687705261657	0.0101798421666918	serpin-11/serpin-10/serpin-12/serpin-32/serpin-5/serpin-4	6
	GO:1901575	BP	GO:1901575	organic substance catabolic process	10/56	190/2885	0.00299452638430999	0.0226386194653835	0.0194171395024732	Tpi/LOC692786/LOC101746072/LOC101743996/LOC100037426/LOC101738819/LOC101736625/LOC101739645/Pglym/hibadh	10
	GO:0051246	BP	GO:0051246	regulation of protein metabolic process	6/56	79/2885	0.00379671680651217	0.0272466913497899	0.0233694818594689	serpin-11/serpin-10/serpin-12/serpin-32/serpin-5/serpin-4	6
	GO:0048519	BP	GO:0048519	negative regulation of biological process	7/56	106/2885	0.00389238447854141	0.0272466913497899	0.0233694818594689	serpin-11/serpin-10/serpin-12/Cbp20/serpin-32/serpin-5/serpin-4	7
	GO:0019318	BP	GO:0019318	hexose metabolic process	3/56	18/2885	0.00459835925481018	0.0310389249699687	0.0266220798962694	Tpi/LOC692786/LOC732915	3
	GO:0005996	BP	GO:0005996	monosaccharide metabolic process	3/56	20/2885	0.00625004626619477	0.0407330601486487	0.0349367377493283	Tpi/LOC692786/LOC732915	3
	GO:0009056	BP	GO:0009056	catabolic process	10/56	216/2885	0.00750948029666899	0.0473097258690146	0.0405775426556851	Tpi/LOC692786/LOC101746072/LOC101743996/LOC100037426/LOC101738819/LOC101736625/LOC101739645/Pglym/hibadh	10
	GO:0005615	CC	GO:0005615	extracellular space	8/54	71/3687	6.49910973808003e-06	0.000301861953509447	0.00023831206856009	serpin-11/serpin-10/serpin-12/SPZ1/Tf/serpin-32/serpin-5/serpin-4	8
	GO:0033176	CC	GO:0033176	proton-transporting V-type ATPase complex	4/54	11/3687	1.2577581396227e-05	0.000301861953509447	0.00023831206856009	LOC732987/LOC101742516/VATPc/LOC692985	4
	GO:0016469	CC	GO:0016469	proton-transporting two-sector ATPase complex	5/54	27/3687	3.5287147028127e-05	0.000564594352450032	0.000445732383513183	LOC732990/LOC732987/LOC101742516/VATPc/LOC692985	5
	GO:1904949	CC	GO:1904949	ATPase complex	5/54	32/3687	8.32590716070874e-05	0.000999108859285049	0.000788770152067144	LOC732990/LOC732987/LOC101742516/VATPc/LOC692985	5
	GO:0005576	CC	GO:0005576	extracellular region	11/54	270/3687	0.0014824917147546	0.0142319204616442	0.0112357266802454	Idgf/LOC101739275/serpin-11/serpin-10/serpin-12/SPZ1/ChiR1/Tf/serpin-32/serpin-5/serpin-4	11
	GO:0005773	CC	GO:0005773	vacuole	4/54	37/3687	0.00189765362344071	0.0151812289875257	0.0119851807796255	LOC101742516/Gal/VATPc/LOC692985	4
	GO:0098796	CC	GO:0098796	membrane protein complex	7/54	142/3687	0.00420893879010462	0.0288612945607174	0.0227852325479348	LOC101741755/LOC732990/LOC732987/LOC101742516/VATPc/LOC101736668/LOC692985	7
	GO:0005774	CC	GO:0005774	vacuolar membrane	3/54	26/3687	0.00608559117291782	0.0365135470375069	0.0288264845032949	LOC101742516/VATPc/LOC692985	3
	GO:0042625	MF	GO:0042625	ATPase-coupled ion transmembrane transporter activity	6/92	16/4109	7.15293474800511e-07	3.09960505746888e-05	2.2839195160297e-05	LOC732990/LOC732987/LOC101742516/VATPc/LOC692984/LOC692985	6
	GO:0044769	MF	GO:0044769	ATPase activity, coupled to transmembrane movement of ions, rotational mechanism	6/92	16/4109	7.15293474800511e-07	3.09960505746888e-05	2.2839195160297e-05	LOC732990/LOC732987/LOC101742516/VATPc/LOC692984/LOC692985	6
	GO:0046961	MF	GO:0046961	proton-transporting ATPase activity, rotational mechanism	6/92	16/4109	7.15293474800511e-07	3.09960505746888e-05	2.2839195160297e-05	LOC732990/LOC732987/LOC101742516/VATPc/LOC692984/LOC692985	6
	GO:0019829	MF	GO:0019829	ATPase-coupled monoatomic cation transmembrane transporter activity	6/92	21/4109	4.42781497828605e-06	0.000143903986794297	0.000106034516585271	LOC732990/LOC732987/LOC101742516/VATPc/LOC692984/LOC692985	6
	GO:0022853	MF	GO:0022853	active monoatomic ion transmembrane transporter activity	6/92	32/4109	6.06195908859006e-05	0.00157610936303342	0.00116134374118252	LOC732990/LOC732987/LOC101742516/VATPc/LOC692984/LOC692985	6
	GO:0016616	MF	GO:0016616	oxidoreductase activity, acting on the CH-OH group of donors, NAD or NADP as acceptor	6/92	34/4109	8.67795095577526e-05	0.00188022270708464	0.00138542725785184	LOC733113/3HCD/LOC101742796/LOC692952/LOC778466/hibadh	6
	GO:0004867	MF	GO:0004867	serine-type endopeptidase inhibitor activity	6/92	37/4109	0.000142108830133719	0.00242689808726692	0.00178824069588089	serpin-11/serpin-10/serpin-12/serpin-32/serpin-5/serpin-4	6
	GO:0016614	MF	GO:0016614	oxidoreductase activity, acting on CH-OH group of donors	7/92	53/4109	0.000149347574601041	0.00242689808726692	0.00178824069588089	LOC733113/3HCD/LOC101742796/LOC692952/LOC101738196/LOC778466/hibadh	7
	GO:0004866	MF	GO:0004866	endopeptidase inhibitor activity	6/92	40/4109	0.000222287352869925	0.00277059061215214	0.00204148781948053	serpin-11/serpin-10/serpin-12/serpin-32/serpin-5/serpin-4	6
	GO:0061135	MF	GO:0061135	endopeptidase regulator activity	6/92	40/4109	0.000222287352869925	0.00277059061215214	0.00204148781948053	serpin-11/serpin-10/serpin-12/serpin-32/serpin-5/serpin-4	6
	GO:0015078	MF	GO:0015078	proton transmembrane transporter activity	6/92	41/4109	0.000255746825737121	0.00277059061215214	0.00204148781948053	LOC732990/LOC732987/LOC101742516/VATPc/LOC692984/LOC692985	6
	GO:0042626	MF	GO:0042626	ATPase-coupled transmembrane transporter activity	6/92	41/4109	0.000255746825737121	0.00277059061215214	0.00204148781948053	LOC732990/LOC732987/LOC101742516/VATPc/LOC692984/LOC692985	6
	GO:0030414	MF	GO:0030414	peptidase inhibitor activity	6/92	44/4109	0.000380402047808493	0.0035323047296503	0.00260275085342653	serpin-11/serpin-10/serpin-12/serpin-32/serpin-5/serpin-4	6
	GO:0061134	MF	GO:0061134	peptidase regulator activity	6/92	44/4109	0.000380402047808493	0.0035323047296503	0.00260275085342653	serpin-11/serpin-10/serpin-12/serpin-32/serpin-5/serpin-4	6
	GO:0004857	MF	GO:0004857	enzyme inhibitor activity	6/92	51/4109	0.000855748631099424	0.00741648813619501	0.00546478073193317	serpin-11/serpin-10/serpin-12/serpin-32/serpin-5/serpin-4	6
	GO:0140678	MF	GO:0140678	molecular function inhibitor activity	6/92	53/4109	0.00105238012887868	0.00855058854713931	0.00630043366631318	serpin-11/serpin-10/serpin-12/serpin-32/serpin-5/serpin-4	6
	GO:0050661	MF	GO:0050661	NADP binding	3/92	11/4109	0.00157363191114469	0.0120336557911065	0.00886690426713107	LOC733113/LOC692786/hibadh	3
	GO:0015399	MF	GO:0015399	primary active transmembrane transporter activity	6/92	59/4109	0.00185469458183347	0.0133950164243529	0.00987001210215474	LOC732990/LOC732987/LOC101742516/VATPc/LOC692984/LOC692985	6
	GO:0008324	MF	GO:0008324	monoatomic cation transmembrane transporter activity	8/92	104/4109	0.00205994549774408	0.0140943639319332	0.0103853207919508	LOC101741755/LOC732990/LOC732987/LOC101742516/VATPc/LOC101736668/LOC692984/LOC692985	8
	GO:0030234	MF	GO:0030234	enzyme regulator activity	8/92	109/4109	0.00277315158455942	0.0180254852996362	0.0132819365365741	serpin-11/serpin-10/serpin-12/LOC101745880/LOC101745878/serpin-32/serpin-5/serpin-4	8
	GO:0022804	MF	GO:0022804	active transmembrane transporter activity	7/92	93/4109	0.00444072841123657	0.0274902234981311	0.0202559541565177	Bm-re/LOC732990/LOC732987/LOC101742516/VATPc/LOC692984/LOC692985	7
	GO:0015020	MF	GO:0015020	glucuronosyltransferase activity	4/92	32/4109	0.00523848043222001	0.0309546570994819	0.0228086947048814	UGT10286/UGT40A1/UGT44A1/UGT41A2	4
	GO:0015075	MF	GO:0015075	monoatomic ion transmembrane transporter activity	8/92	129/4109	0.00772637473862805	0.0436708137400716	0.0321784943347896	LOC101741755/LOC732990/LOC732987/LOC101742516/VATPc/LOC101736668/LOC692984/LOC692985	8

## Sheet: 8-module 8 
KEGG enrichment	category	subcategory	ID	Description	GeneRatio	BgRatio	pvalue	p.adjust	qvalue	geneID	Count
	Genetic Information Processing	Translation	bmor03008	Ribosome biogenesis in eukaryotes - Bombyx mori (domestic silkworm)	33/102	78/3418	7.03190083753359e-32	3.65658843551746e-30	3.33090039672644e-30	101741801/101742458/101746301/101739183/692502/101735934/101735526/733105/692972/101746403/101745003/101742367/101742911/101739847/101739095/101740002/101745565/101746947/101735989/101744824/100862801/101735682/101746348/101737534/101738878/101736688/101745253/101742143/101744752/101736210/101737128/732976/101745671	33
	Genetic Information Processing	Transcription	bmor03040	Spliceosome - Bombyx mori (domestic silkworm)	11/102	128/3418	0.00128656811943669	0.033450771105354	0.0304713501971848	100146101/692972/732932/101736496/101738508/692785/692842/733037/101743561/732985/101742628	11
	Metabolism	Glycan biosynthesis and metabolism	bmor00531	Glycosaminoglycan degradation - Bombyx mori (domestic silkworm)	3/102	18/3418	0.0151978015678679	0.197571420382283	0.179973965935278	101737902/101737480/101745680	3
	Genetic Information Processing	Replication and repair	bmor03430	Mismatch repair - Bombyx mori (domestic silkworm)	3/102	18/3418	0.0151978015678679	0.197571420382283	0.179973965935278	101739080/692356/101743378	3
	Genetic Information Processing	Folding, sorting and degradation	bmor03018	RNA degradation - Bombyx mori (domestic silkworm)	5/102	56/3418	0.0245620737633209	0.255445567138537	0.232693330389356	101741707/101738613/100101185/692852/101736954	5
	Metabolism	Global and overview maps	bmor01232	Nucleotide metabolism - Bombyx mori (domestic silkworm)	5/102	59/3418	0.0300216882694714	0.260187965002086	0.237013328443196	101735934/101741714/101740233/101738209/101741112	5
	Metabolism	Biosynthesis of other secondary metabolites	bmor00232	Caffeine metabolism - Bombyx mori (domestic silkworm)	2/102	12/3418	0.0479015107543365	0.283621332321137	0.25836	101738209/101741112	2
	Metabolism	Xenobiotics biodegradation and metabolism	bmor00983	Drug metabolism - other enzymes - Bombyx mori (domestic silkworm)	6/102	91/3418	0.0527127386311036	0.283621332321137	0.25836	100500755/101741714/101740233/692850/101738209/101741112	6
	Genetic Information Processing	Transcription	bmor03020	RNA polymerase - Bombyx mori (domestic silkworm)	3/102	30/3418	0.0585105678756828	0.283621332321137	0.25836	101746840/101741060/101739534	3
	Genetic Information Processing	Replication and repair	bmor03410	Base excision repair - Bombyx mori (domestic silkworm)	3/102	30/3418	0.0585105678756828	0.283621332321137	0.25836	101741812/101739080/692356	3
	Metabolism	Nucleotide metabolism	bmor00230	Purine metabolism - Bombyx mori (domestic silkworm)	6/102	94/3418	0.0599968202987021	0.283621332321137	0.25836	101735934/101741714/101740233/732910/101738209/101741112	6
	Genetic Information Processing	Replication and repair	bmor03030	DNA replication - Bombyx mori (domestic silkworm)	3/102	34/3418	0.0792542808159172	0.343435216868974	0.312845845325989	101741812/101739080/692356	3
	Genetic Information Processing	Translation	bmor03010	Ribosome - Bombyx mori (domestic silkworm)	7/102	130/3418	0.0912949850088826	0.365179940035531	0.332653791530342	101736455/101745675/732873/732896/101742782/101745655/101736359	7
	Metabolism	Metabolism of cofactors and vitamins	bmor00670	One carbon pool by folate - Bombyx mori (domestic silkworm)	2/102	26/3418	0.180959795752082	0.659134396445609	0.600426069636689	100101173/733097	2
	Metabolism	Carbohydrate metabolism	bmor00030	Pentose phosphate pathway - Bombyx mori (domestic silkworm)	2/102	27/3418	0.191842542934642	0.659134396445609	0.600426069636689	101741451/101746910	2
	Genetic Information Processing	Information processing in viruses	bmor03250	Viral life cycle - HIV-1 - Bombyx mori (domestic silkworm)	2/102	28/3418	0.202810583521726	0.659134396445609	0.600426069636689	692898/101740002	2
	Cellular Processes	Transport and catabolism	bmor04137	Mitophagy - animal - Bombyx mori (domestic silkworm)	3/102	56/3418	0.233043384697819	0.712838588487447	0.649346892346865	692502/693063/101746245	3
	Metabolism	Nucleotide metabolism	bmor00240	Pyrimidine metabolism - Bombyx mori (domestic silkworm)	2/102	34/3418	0.269645480847085	0.769201898403633	0.700689988424362	101741714/692850	2
	Metabolism	Global and overview maps	bmor01240	Biosynthesis of cofactors - Bombyx mori (domestic silkworm)	6/102	154/3418	0.310614407890031	0.769201898403633	0.700689988424362	101735934/100500755/733097/101738873/692850/101736222	6
	Metabolism	Amino acid metabolism	bmor00270	Cysteine and methionine metabolism - Bombyx mori (domestic silkworm)	2/102	38/3418	0.314332352340457	0.769201898403633	0.700689988424362	100101173/733097	2
GO enrichment		ONTOLOGY	ID	Description	GeneRatio	BgRatio	pvalue	p.adjust	qvalue	geneID	Count
	GO:0042254	BP	GO:0042254	ribosome biogenesis	23/81	52/2885	1.40096264714785e-23	3.02607931783935e-21	2.77243134382942e-21	LOC101742458/LOC101738701/LOC101742563/LOC101736588/LOC733105/RpL7Ae/LOC101745565/LOC101739263/LOC732986/LOC101736576/Nep1/LOC101735859/LOC101743869/LOC101735417/LOC101740635/LOC101739640/LOC692935/LOC101739710/LOC101746190/LOC101738785/LOC101747169/LOC101746876/LOC101736210	23
	GO:0022613	BP	GO:0022613	ribonucleoprotein complex biogenesis	24/81	77/2885	2.77864952239009e-20	3.00094148418129e-18	2.74940058004914e-18	LOC101742458/LOC692936/LOC101738701/LOC101742563/LOC101736588/LOC733105/RpL7Ae/LOC101745565/LOC101739263/LOC732986/LOC101736576/Nep1/LOC101735859/LOC101743869/LOC101735417/LOC101740635/LOC101739640/LOC692935/LOC101739710/LOC101746190/LOC101738785/LOC101747169/LOC101746876/LOC101736210	24
	GO:0006364	BP	GO:0006364	rRNA processing	14/81	34/2885	5.30739667116596e-14	2.86599420242962e-12	2.62576466889263e-12	LOC101738701/LOC101742563/LOC101736588/LOC101745565/LOC101739263/LOC732986/LOC101736576/Nep1/LOC101735859/LOC101739640/LOC101739710/LOC101746190/LOC101747169/LOC101736210	14
	GO:0016072	BP	GO:0016072	rRNA metabolic process	14/81	34/2885	5.30739667116596e-14	2.86599420242962e-12	2.62576466889263e-12	LOC101738701/LOC101742563/LOC101736588/LOC101745565/LOC101739263/LOC732986/LOC101736576/Nep1/LOC101735859/LOC101739640/LOC101739710/LOC101746190/LOC101747169/LOC101736210	14
	GO:0006396	BP	GO:0006396	RNA processing	25/81	162/2885	3.13903920233448e-13	1.35606493540849e-11	1.24239867376607e-11	LOC101738262/LOC101738356/LOC101738701/LOC101742563/LOC101736588/LOC101745565/LOC101739263/LOC732986/LOC101738613/LOC101736576/LOC101743124/Nep1/LOC101735859/LOC733037/LOC101742765/Elp1/LOC101743561/LOC732985/LOC101739640/LOC101739710/LOC101746190/LOC101744320/LOC101744752/LOC101747169/LOC101736210	25
	GO:0044085	BP	GO:0044085	cellular component biogenesis	25/81	167/2885	6.46395345588514e-13	2.32702324411865e-11	2.13197061352001e-11	LOC101742458/LOC692936/LOC101738701/LOC101742563/LOC101736588/LOC733105/RpL7Ae/LOC101745565/LOC101739263/LOC732986/LOC692892/LOC101736576/Nep1/LOC101735859/LOC101743869/LOC101735417/LOC101740635/LOC101739640/LOC692935/LOC101739710/LOC101746190/LOC101738785/LOC101747169/LOC101746876/LOC101736210	25
	GO:0034470	BP	GO:0034470	ncRNA processing	16/81	63/2885	4.20791142596604e-12	1.29844124001238e-10	1.1896050347092e-10	LOC101738701/LOC101742563/LOC101736588/LOC101745565/LOC101739263/LOC732986/LOC101736576/LOC101743124/Nep1/LOC101735859/Elp1/LOC101739640/LOC101739710/LOC101746190/LOC101747169/LOC101736210	16
	GO:0034660	BP	GO:0034660	ncRNA metabolic process	16/81	83/2885	3.83498568866276e-10	1.03544613593894e-08	9.48654354563945e-09	LOC101738701/LOC101742563/LOC101736588/LOC101745565/LOC101739263/LOC732986/LOC101736576/LOC101743124/Nep1/LOC101735859/Elp1/LOC101739640/LOC101739710/LOC101746190/LOC101747169/LOC101736210	16
	GO:0071840	BP	GO:0071840	cellular component organization or biogenesis	27/81	304/2885	1.58440287819736e-08	3.80256690767365e-07	3.48383322925267e-07	LOC101742458/LOC692936/LOC101738701/LOC101742563/LOC101736588/LOC733105/RpL7Ae/LOC101745565/LOC101739263/LOC732986/LOC692892/LOC101736576/Nep1/LOC101735859/LOC101743869/LOC101735417/LOC101743733/LOC101740635/LOC101739640/LOC692935/LOC101739710/LOC101746190/LOC101738785/LOC101747169/LOC101746876/LOC101736210/LOC101746245	27
	GO:0016070	BP	GO:0016070	RNA metabolic process	30/81	415/2885	2.37336117739492e-07	5.12646014317302e-06	4.69675685631837e-06	LOC101738262/LOC101738356/LOC101738701/LOC101742563/LOC101736588/LOC101741135/LOC101745565/LOC101739263/LOC732986/LOC101738613/LOC101741060/LOC101736576/LOC101743124/Nep1/LOC101735859/LOC101746052/LOC733037/LOC101742765/LOC101741812/Elp1/LOC101743561/LOC732985/LOC101739640/LOC101740493/LOC101739710/LOC101746190/LOC101744320/LOC101744752/LOC101747169/LOC101736210	30
	GO:0043414	BP	GO:0043414	macromolecule methylation	5/81	25/2885	0.000526560015583917	0.0103397239423751	0.00947304142868674	LOC101741135/LOC101736309/Nep1/LOC101742218/LOC101741423	5
	GO:0018193	BP	GO:0018193	peptidyl-amino acid modification	6/81	44/2885	0.00122317136695811	0.0220170846052459	0.0201715979814144	LOC101746449/LOC692862/LOC101737352/LOC101736309/LOC101742218/LOC101741423	6
	GO:0032259	BP	GO:0032259	methylation	6/81	47/2885	0.00173975156865201	0.0289066414483718	0.0264836676037714	LOC101741135/LOC101736309/LOC101739263/Nep1/LOC101742218/LOC101741423	6
	GO:0009161	BP	GO:0009161	ribonucleoside monophosphate metabolic process	3/81	10/2885	0.00221955425713995	0.0342445513958735	0.0313741504016775	LOC101740233/LOC732910/LOC692850	3
	GO:0009124	BP	GO:0009124	nucleoside monophosphate biosynthetic process	3/81	11/2885	0.00299042857751826	0.043062171516263	0.0394526717595392	LOC101740233/LOC732910/LOC692850	3
	GO:0006479	BP	GO:0006479	protein methylation	3/81	12/2885	0.00390703766270946	0.0468844519525135	0.0429545661163379	LOC101736309/LOC101742218/LOC101741423	3
	GO:0008213	BP	GO:0008213	protein alkylation	3/81	12/2885	0.00390703766270946	0.0468844519525135	0.0429545661163379	LOC101736309/LOC101742218/LOC101741423	3
	GO:0009123	BP	GO:0009123	nucleoside monophosphate metabolic process	3/81	12/2885	0.00390703766270946	0.0468844519525135	0.0429545661163379	LOC101740233/LOC732910/LOC692850	3
	GO:0005730	CC	GO:0005730	nucleolus	26/101	48/3687	1.35288035110327e-29	7.57612996617831e-28	6.12356369446744e-28	LOC101742458/LOC733051/LOC101742563/LOC101736588/LOC101735350/LOC733105/LOC101737447/RpL7Ae/LOC101746403/LOC101743321/LOC101745565/LOC101739263/LOC732986/LOC101746034/LOC101742504/LOC101746052/LOC101735417/LOC101739431/LOC101741812/LOC101740635/LOC692935/LOC101739710/LOC101738785/LOC101747169/LOC101746876/LOC732976	26
	GO:0031974	CC	GO:0031974	membrane-enclosed lumen	30/101	144/3687	1.14473971917634e-19	1.60263560684688e-18	1.29536336643639e-18	LOC101742458/LOC101740588/LOC733051/LOC101742563/LOC101736588/LOC101735350/LOC692953/LOC733105/LOC101737447/RpL7Ae/LOC101746403/LOC101743321/LOC101745565/LOC101739263/LOC732986/LOC101746034/LOC101742504/LOC101746052/LOC101735417/LOC101735786/LOC101739431/LOC101741812/LOC101740635/LOC692935/LOC101739710/LOC101738785/LOC101747169/LOC101746876/mRpS10/LOC732976	30
	GO:0043233	CC	GO:0043233	organelle lumen	30/101	144/3687	1.14473971917634e-19	1.60263560684688e-18	1.29536336643639e-18	LOC101742458/LOC101740588/LOC733051/LOC101742563/LOC101736588/LOC101735350/LOC692953/LOC733105/LOC101737447/RpL7Ae/LOC101746403/LOC101743321/LOC101745565/LOC101739263/LOC732986/LOC101746034/LOC101742504/LOC101746052/LOC101735417/LOC101735786/LOC101739431/LOC101741812/LOC101740635/LOC692935/LOC101739710/LOC101738785/LOC101747169/LOC101746876/mRpS10/LOC732976	30
	GO:0070013	CC	GO:0070013	intracellular organelle lumen	30/101	144/3687	1.14473971917634e-19	1.60263560684688e-18	1.29536336643639e-18	LOC101742458/LOC101740588/LOC733051/LOC101742563/LOC101736588/LOC101735350/LOC692953/LOC733105/LOC101737447/RpL7Ae/LOC101746403/LOC101743321/LOC101745565/LOC101739263/LOC732986/LOC101746034/LOC101742504/LOC101746052/LOC101735417/LOC101735786/LOC101739431/LOC101741812/LOC101740635/LOC692935/LOC101739710/LOC101738785/LOC101747169/LOC101746876/mRpS10/LOC732976	30
	GO:0031981	CC	GO:0031981	nuclear lumen	26/101	102/3687	2.10338350676209e-19	2.35578952757354e-18	1.90411559559516e-18	LOC101742458/LOC733051/LOC101742563/LOC101736588/LOC101735350/LOC733105/LOC101737447/RpL7Ae/LOC101746403/LOC101743321/LOC101745565/LOC101739263/LOC732986/LOC101746034/LOC101742504/LOC101746052/LOC101735417/LOC101739431/LOC101741812/LOC101740635/LOC692935/LOC101739710/LOC101738785/LOC101747169/LOC101746876/LOC732976	26
	GO:0043228	CC	GO:0043228	non-membrane-bounded organelle	35/101	388/3687	3.44965658119348e-11	2.75972526495479e-10	2.23060500738827e-10	LOC101742458/LOC101740588/LOC733051/LOC101742563/LOC101736588/LOC101735350/LOC733105/LOC101738671/LOC101737447/RpL7Ae/LOC101746403/LOC101743321/LOC101743603/LOC101745565/LOC101739263/LOC732986/LOC101745675/LOC101746034/LOC101742504/LOC101746052/LOC101735417/LOC101739431/LOC101741812/LOC101740635/LOC692935/LOC101739710/LOC101738785/LOC101747169/mRpS5/LOC101746876/mRpS25/mRpS10/LOC732976/LOC1017427…	35
	GO:0043232	CC	GO:0043232	intracellular non-membrane-bounded organelle	35/101	388/3687	3.44965658119348e-11	2.75972526495479e-10	2.23060500738827e-10	LOC101742458/LOC101740588/LOC733051/LOC101742563/LOC101736588/LOC101735350/LOC733105/LOC101738671/LOC101737447/RpL7Ae/LOC101746403/LOC101743321/LOC101743603/LOC101745565/LOC101739263/LOC732986/LOC101745675/LOC101746034/LOC101742504/LOC101746052/LOC101735417/LOC101739431/LOC101741812/LOC101740635/LOC692935/LOC101739710/LOC101738785/LOC101747169/mRpS5/LOC101746876/mRpS25/mRpS10/LOC732976/LOC1017427…	35
	GO:1990904	CC	GO:1990904	ribonucleoprotein complex	23/101	216/3687	8.01073785890244e-09	5.60751650123171e-08	4.53239115701059e-08	LOC101742458/LOC101738262/LOC101738356/LOC101740588/LOC692936/LOC101736588/LOC101738671/RpL7Ae/LOC101743603/LOC101745565/LOC732986/LOC101745675/LOC733037/LOC732985/LOC101746190/LOC101744752/mRpS5/LOC101746876/mRpS25/mRpS10/LOC732976/LOC101742782/LOC101745655	23
	GO:0005759	CC	GO:0005759	mitochondrial matrix	4/101	25/3687	0.00430979236189591	0.0268164858073523	0.0216749791300028	LOC101740588/LOC692953/LOC101735786/mRpS10	4
	GO:0005840	CC	GO:0005840	ribosome	10/101	142/3687	0.00499123913038541	0.0279509391301583	0.0225919244849024	LOC101740588/LOC101738671/RpL7Ae/LOC101743603/LOC101745675/mRpS5/mRpS25/mRpS10/LOC101742782/LOC101745655	10
	GO:0003723	MF	GO:0003723	RNA binding	43/125	258/4109	5.05851889446849e-22	6.12080786230687e-20	5.0052713271583e-20	LOC101746268/LOC101742458/LOC101738262/LOC101738345/LOC733051/LOC101744385/LOC101738701/LOC100037428/LOC101735809/LOC101747007/Tra2/LOC100862825/Nopp34/LOC732983/LOC101736520/LOC101741135/RpL7Ae/SNF/LOC101736576/LOC101743124/Nep1/LOC101745872/LOC692842/LOC733037/Pabn1/LOC733055/Nol8/LOC101745118/LOC693063/LOC101739919/LOC101738076/LOC101743561/LOC732985/LOC101739640/LOC101739710/Eif2g/LOC10173878…	43
	GO:0008168	MF	GO:0008168	methyltransferase activity	12/125	65/4109	3.79239858577199e-07	1.91921730917234e-05	1.5694339022375e-05	LOC101735838/LOC101738695/LOC732983/LOC101737447/LOC101741135/LOC101736309/LOC101739263/Nep1/LOC101742218/LOC101745118/LOC101738076/LOC101741423	12
	GO:0000049	MF	GO:0000049	tRNA binding	6/125	12/4109	5.59577568669193e-07	1.91921730917234e-05	1.5694339022375e-05	LOC101738345/LOC732983/LOC101743124/LOC101745118/LOC101738076/Eif2g	6
	GO:0016741	MF	GO:0016741	transferase activity, transferring one-carbon groups	12/125	68/4109	6.34452003032179e-07	1.91921730917234e-05	1.5694339022375e-05	LOC101735838/LOC101738695/LOC732983/LOC101737447/LOC101741135/LOC101736309/LOC101739263/Nep1/LOC101742218/LOC101745118/LOC101738076/LOC101741423	12
	GO:0008757	MF	GO:0008757	S-adenosylmethionine-dependent methyltransferase activity	9/125	37/4109	1.01338193121709e-06	2.45238427354535e-05	2.0054295059875e-05	LOC101738695/LOC732983/LOC101737447/LOC101736309/Nep1/LOC101742218/LOC101745118/LOC101738076/LOC101741423	9
	GO:0019843	MF	GO:0019843	rRNA binding	6/125	17/4109	6.61073642187288e-06	0.000133316517841103	0.000109019162044921	LOC101738701/LOC101736576/Nep1/LOC101739640/LOC101739710/LOC101736210	6
	GO:0008173	MF	GO:0008173	RNA methyltransferase activity	6/125	18/4109	9.67049748408996e-06	0.000167161456510698	0.000136695753910445	LOC101738695/LOC732983/LOC101737447/Nep1/LOC101745118/LOC101738076	6
	GO:0140640	MF	GO:0140640	catalytic activity, acting on a nucleic acid	16/125	154/4109	1.2667722255773e-05	0.000191599299118567	0.000156679722637193	LOC101744385/LOC101735809/LOC101737096/LOC101738695/LOC100862825/LOC732983/LOC101737447/LOC101743874/LOC732932/Nep1/LOC101738164/LOC101745872/LOC101745118/LOC101741812/LOC101738076/LOC101739534	16
	GO:0043021	MF	GO:0043021	ribonucleoprotein complex binding	5/125	12/4109	1.60549008924491e-05	0.000215849223109593	0.000176510021507628	LOC101736588/LOC733105/LOC732871/LOC101735786/LOC101746621	5
	GO:0140098	MF	GO:0140098	catalytic activity, acting on RNA	13/125	110/4109	2.21318654116804e-05	0.000267795571481333	0.00021898898407347	LOC101735809/LOC101737096/LOC101738695/LOC100862825/LOC732983/LOC101737447/LOC101743874/LOC732932/Nep1/LOC101745872/LOC101745118/LOC101738076/LOC101739534	13
	GO:0008170	MF	GO:0008170	N-methyltransferase activity	5/125	19/4109	0.000198515217030052	0.00218366738733057	0.00178568711969616	LOC101738695/LOC101736309/LOC101742218/LOC101738076/LOC101741423	5
	GO:0004386	MF	GO:0004386	helicase activity	7/125	44/4109	0.000305926610425228	0.00308475998845438	0.00252255275262907	LOC101744385/LOC101735809/LOC101737096/LOC100862825/LOC732932/LOC101738164/LOC101745872	7
	GO:0003724	MF	GO:0003724	RNA helicase activity	5/125	26/4109	0.000946428908015442	0.00811444063163175	0.00663555823726303	LOC101735809/LOC101737096/LOC100862825/LOC732932/LOC101745872	5
	GO:0008186	MF	GO:0008186	ATP-dependent activity, acting on RNA	5/125	26/4109	0.000946428908015442	0.00811444063163175	0.00663555823726303	LOC101735809/LOC101737096/LOC100862825/LOC732932/LOC101745872	5
	GO:0003743	MF	GO:0003743	translation initiation factor activity	6/125	39/4109	0.00100592239235104	0.00811444063163175	0.00663555823726303	LOC692936/LOC100037428/LOC733081/LOC733105/LOC693063/Eif2g	6
	GO:0044877	MF	GO:0044877	protein-containing complex binding	5/125	35/4109	0.00375258618771453	0.0283789330445912	0.0232067830029715	LOC101736588/LOC733105/LOC732871/LOC101735786/LOC101746621	5
	GO:0008135	MF	GO:0008135	translation factor activity, RNA binding	6/125	55/4109	0.00601264392978171	0.0404183286390882	0.0330519607835954	LOC692936/LOC100037428/LOC733081/LOC733105/LOC693063/Eif2g	6
	GO:0090079	MF	GO:0090079	translation regulator activity, nucleic acid binding	6/125	55/4109	0.00601264392978171	0.0404183286390882	0.0330519607835954	LOC692936/LOC100037428/LOC733081/LOC733105/LOC693063/Eif2g	6
	GO:0045182	MF	GO:0045182	translation regulator activity	6/125	56/4109	0.00657001298223376	0.0418406089921203	0.0342150260570623	LOC692936/LOC100037428/LOC733081/LOC733105/LOC693063/Eif2g	6

## Sheet: 9-module 9
KEGG enrichment	category	subcategory	ID	Description	GeneRatio	BgRatio	pvalue	p.adjust	qvalue	geneID	Count
	Genetic Information Processing	Folding, sorting and degradation	bmor03050	Proteasome - Bombyx mori (domestic silkworm)	19/70	39/3418	3.02852325990891e-23	1.51426162995445e-21	1.33892607280183e-21	101746822/692958/733131/101746211/733124/692896/732998/101745852/778515/732922/101736622/732870/105842587/100101166/101740220/101747034/732999/732876/101737187	19
	Metabolism	Energy metabolism	bmor00190	Oxidative phosphorylation - Bombyx mori (domestic silkworm)	25/70	131/3418	5.93343222587303e-19	1.48335805646826e-17	1.31160080782456e-17	101742612/100174851/100134921/751613/778510/100134927/101738009/692925/732995/101738548/733017/732989/101740204/100101181/100127121/100101165/101744608/101745713/733018/693099/692926/101738954/780848/101745480/101742176	25
	Metabolism	Glycan biosynthesis and metabolism	bmor00510	N-Glycan biosynthesis - Bombyx mori (domestic silkworm)	4/70	35/3418	0.0052330703649078	0.0872178394151301	0.0771189316933782	101736101/101745402/778504/101747213	4
	Metabolism	Glycan biosynthesis and metabolism	bmor00513	Various types of N-glycan biosynthesis - Bombyx mori (domestic silkworm)	4/70	44/3418	0.0118187559224276	0.147734449030345	0.130628354932094	101736101/101745402/778504/101747213	4
	Metabolism	Amino acid metabolism	bmor00380	Tryptophan metabolism - Bombyx mori (domestic silkworm)	3/70	33/3418	0.028941744257294	0.261120691658594	0.230885664203388	101742893/101745599/100101202	3
	Metabolism	Lipid metabolism	bmor00071	Fatty acid degradation - Bombyx mori (domestic silkworm)	3/70	36/3418	0.0362689115591138	0.261120691658594	0.230885664203388	733095/101745599/100101202	3
	Metabolism	Carbohydrate metabolism	bmor00650	Butanoate metabolism - Bombyx mori (domestic silkworm)	2/70	15/3418	0.0365568968322032	0.261120691658594	0.230885664203388	101745599/100101202	2
	Genetic Information Processing	Folding, sorting and degradation	bmor04141	Protein processing in endoplasmic reticulum - Bombyx mori (domestic silkworm)	6/70	128/3418	0.0454420279344718	0.284012674590449	0.251126996479976	101736101/101745402/100328606/778504/101747213/101741441	6
	Metabolism	Global and overview maps	bmor01200	Carbon metabolism - Bombyx mori (domestic silkworm)	5/70	116/3418	0.08726521049413	0.484806724967389	0.428671209444849	733095/101737545/101745599/100101202/101742176	5
	Metabolism	Metabolism of cofactors and vitamins	bmor00790	Folate biosynthesis - Bombyx mori (domestic silkworm)	2/70	28/3418	0.111182554122077	0.555912770610386	0.491543923487078	101741781/101736565	2
	Metabolism	Xenobiotics biodegradation and metabolism	bmor00980	Metabolism of xenobiotics by cytochrome P450 - Bombyx mori (domestic silkworm)	3/70	67/3418	0.156689361990716	0.656635637178098	0.58060414234695	101741781/733095/692819	3
	Metabolism	Amino acid metabolism	bmor00350	Tyrosine metabolism - Bombyx mori (domestic silkworm)	2/70	36/3418	0.167341041970436	0.656635637178098	0.58060414234695	733095/692890	2
	Metabolism	Amino acid metabolism	bmor00310	Lysine degradation - Bombyx mori (domestic silkworm)	2/70	39/3418	0.18951012963692	0.656635637178098	0.58060414234695	101745599/100101202	2
	Metabolism	Carbohydrate metabolism	bmor00620	Pyruvate metabolism - Bombyx mori (domestic silkworm)	2/70	39/3418	0.18951012963692	0.656635637178098	0.58060414234695	733095/100101202	2
	Metabolism	Amino acid metabolism	bmor00280	Valine, leucine and isoleucine degradation - Bombyx mori (domestic silkworm)	2/70	40/3418	0.196990691153429	0.656635637178098	0.58060414234695	101745599/100101202	2
	Metabolism	Amino acid metabolism	bmor00360	Phenylalanine metabolism - Bombyx mori (domestic silkworm)	1/70	12/3418	0.220196899223124	0.688115310072264	0.608438800484949	692890	1
GO enrichment		ONTOLOGY	ID	Description	GeneRatio	BgRatio	pvalue	p.adjust	qvalue	geneID	Count
	GO:0030163	BP	GO:0030163	protein catabolic process	17/53	63/2885	1.05726601815853e-16	2.07224139559072e-14	1.7250129769955e-14	LOC101746822/LOC101746211/LOC733124/LOC692896/Rad23/LOC732998/LOC101745852/LOC778515/LOC732922/LOC101736622/LOC732870/LOC100101166/LOC101740220/LOC101747034/LOC732999/LOC732876/LOC101737187	17
	GO:0009057	BP	GO:0009057	macromolecule catabolic process	17/53	106/2885	1.20768142375502e-12	1.18352779527992e-10	9.85213793063307e-11	LOC101746822/LOC101746211/LOC733124/LOC692896/Rad23/LOC732998/LOC101745852/LOC778515/LOC732922/LOC101736622/LOC732870/LOC100101166/LOC101740220/LOC101747034/LOC732999/LOC732876/LOC101737187	17
	GO:1901565	BP	GO:1901565	organonitrogen compound catabolic process	17/53	111/2885	2.65226748838338e-12	1.73281475907714e-10	1.44246126561201e-10	LOC101746822/LOC101746211/LOC733124/LOC692896/Rad23/LOC732998/LOC101745852/LOC778515/LOC732922/LOC101736622/LOC732870/LOC100101166/LOC101740220/LOC101747034/LOC732999/LOC732876/LOC101737187	17
	GO:0051603	BP	GO:0051603	proteolysis involved in protein catabolic process	13/53	55/2885	4.70074818448836e-12	2.3033666103993e-10	1.91741044367288e-10	LOC101746822/LOC733124/LOC692896/Rad23/LOC732998/LOC101745852/LOC778515/LOC732922/LOC101736622/LOC100101166/LOC101740220/LOC732999/LOC732876	13
	GO:0042775	BP	GO:0042775	mitochondrial ATP synthesis coupled electron transport	9/53	24/2885	1.24867334082818e-10	4.89479949604645e-09	4.07461827007089e-09	LOC101742612/LOC101743287/Uccr/LOC778510/LOC100134927/LOC101744608/LOC101736533/LOC780848/LOC101745480	9
	GO:0006119	BP	GO:0006119	oxidative phosphorylation	10/53	34/2885	1.69734476704507e-10	5.38753151707744e-09	4.48478724568745e-09	LOC101742612/LOC101743287/Uccr/LOC778510/LOC100134927/LOC101738548/LOC101744608/LOC101736533/LOC780848/LOC101745480	10
	GO:0019646	BP	GO:0019646	aerobic electron transport chain	9/53	25/2885	1.92411839895623e-10	5.38753151707744e-09	4.48478724568745e-09	LOC101742612/LOC101743287/Uccr/LOC778510/LOC100134927/LOC101744608/LOC101736533/LOC780848/LOC101745480	9
	GO:0009060	BP	GO:0009060	aerobic respiration	11/53	52/2885	9.32760274091933e-10	2.28526267152524e-08	1.9023400326875e-08	LOC101742612/LOC101743287/Uccr/LOC778510/LOC100134927/LOC101738548/LOC101744608/LOC101736533/LOC780848/LOC101745480/LOC101742176	11
	GO:0042773	BP	GO:0042773	ATP synthesis coupled electron transport	9/53	31/2885	1.74669448587216e-09	3.80391243589938e-08	3.16652216737059e-08	LOC101742612/LOC101743287/Uccr/LOC778510/LOC100134927/LOC101744608/LOC101736533/LOC780848/LOC101745480	9
	GO:1901575	BP	GO:1901575	organic substance catabolic process	18/53	190/2885	2.06823282692277e-09	3.87988556358941e-08	3.22976510395467e-08	LOC101746822/LOC101746211/LOC733124/LOC692896/Rad23/LOC732998/LOC101737545/LOC101745852/LOC778515/LOC732922/LOC101736622/LOC732870/LOC100101166/LOC101740220/LOC101747034/LOC732999/LOC732876/LOC101737187	18
	GO:0045333	BP	GO:0045333	cellular respiration	11/53	56/2885	2.17748679589202e-09	3.87988556358941e-08	3.22976510395467e-08	LOC101742612/LOC101743287/Uccr/LOC778510/LOC100134927/LOC101738548/LOC101744608/LOC101736533/LOC780848/LOC101745480/LOC101742176	11
	GO:0015980	BP	GO:0015980	energy derivation by oxidation of organic compounds	11/53	61/2885	5.71129373292034e-09	8.72378963672602e-08	7.26201607783316e-08	LOC101742612/LOC101743287/Uccr/LOC778510/LOC100134927/LOC101738548/LOC101744608/LOC101736533/LOC780848/LOC101745480/LOC101742176	11
	GO:0022904	BP	GO:0022904	respiratory electron transport chain	9/53	35/2885	5.78618700395093e-09	8.72378963672602e-08	7.26201607783316e-08	LOC101742612/LOC101743287/Uccr/LOC778510/LOC100134927/LOC101744608/LOC101736533/LOC780848/LOC101745480	9
	GO:0006091	BP	GO:0006091	generation of precursor metabolites and energy	12/53	80/2885	9.54601208785444e-09	1.33644169229962e-07	1.11250516813341e-07	LOC101742612/LOC101743287/Uccr/LOC778510/LOC100134927/LOC101738548/LOC733095/LOC101744608/LOC101736533/LOC780848/LOC101745480/LOC101742176	12
	GO:0009056	BP	GO:0009056	catabolic process	18/53	216/2885	1.67493021088863e-08	2.18857547556114e-07	1.82185391359816e-07	LOC101746822/LOC101746211/LOC733124/LOC692896/Rad23/LOC732998/LOC101737545/LOC101745852/LOC778515/LOC732922/LOC101736622/LOC732870/LOC100101166/LOC101740220/LOC101747034/LOC732999/LOC732876/LOC101737187	18
	GO:0022900	BP	GO:0022900	electron transport chain	9/53	40/2885	2.0900221945868e-08	2.56027718836884e-07	2.13127263263786e-07	LOC101742612/LOC101743287/Uccr/LOC778510/LOC100134927/LOC101744608/LOC101736533/LOC780848/LOC101745480	9
	GO:0006511	BP	GO:0006511	ubiquitin-dependent protein catabolic process	7/53	46/2885	1.45266414833482e-05	0.000167483631219779	0.000139419778942351	LOC692896/Rad23/LOC732998/LOC778515/LOC732922/LOC732999/LOC732876	7
	GO:0019941	BP	GO:0019941	modification-dependent protein catabolic process	7/53	47/2885	1.68294525358966e-05	0.00017360908931767	0.000144518844491079	LOC692896/Rad23/LOC732998/LOC778515/LOC732922/LOC732999/LOC732876	7
	GO:0043632	BP	GO:0043632	modification-dependent macromolecule catabolic process	7/53	47/2885	1.68294525358966e-05	0.00017360908931767	0.000144518844491079	LOC692896/Rad23/LOC732998/LOC778515/LOC732922/LOC732999/LOC732876	7
	GO:0006123	BP	GO:0006123	mitochondrial electron transport, cytochrome c to oxygen	4/53	11/2885	3.04818929508557e-05	0.000298722550918386	0.00024866807407277	LOC101743287/LOC100134927/LOC101744608/LOC780848	4
	GO:0006508	BP	GO:0006508	proteolysis	15/53	294/2885	0.000159955663606337	0.00149291952699248	0.00124276330120212	LOC101746822/LOC733124/LOC692896/Rad23/LOC732998/LOC101745852/LOC101740973/LOC778515/LOC732922/LOC101736622/LOC732870/LOC100101166/LOC101740220/LOC732999/LOC732876	15
	GO:1901137	BP	GO:1901137	carbohydrate derivative biosynthetic process	6/53	82/2885	0.00346067777467648	0.0308314929016632	0.0256653136399452	LOC101736101/LOC101745402/LOC101745780/LOC692925/LOC778504/LOC100101181	6
	GO:0010498	BP	GO:0010498	proteasomal protein catabolic process	3/53	18/2885	0.00393192209375073	0.0335068143641367	0.0278923535254629	Rad23/LOC101736622/LOC732999	3
	GO:1902494	CC	GO:1902494	catalytic complex	36/63	239/3687	1.33673350456009e-27	8.42142107872854e-26	3.79913732874972e-26	LOC101743287/LOC101746822/LOC692958/LOC101736101/LOC733131/LOC101746211/LOC733124/LOC692896/LOC101745402/LOC101745780/Uccr/LOC778510/LOC100134927/LOC692925/LOC101738548/Atpsyn-beta/LOC100101181/LOC732998/LOC100101165/LOC101744608/LOC101745852/LOC101742895/LOC778515/LOC732922/LOC101736622/LOC732870/LOC692926/LOC100101166/LOC780848/LOC101740220/LOC101745480/LOC101747034/LOC732999/LOC101742176/LOC73…	36
	GO:1905369	CC	GO:1905369	endopeptidase complex	19/63	36/3687	9.45409477080015e-26	2.97803985280205e-24	1.34347662532423e-24	LOC101746822/LOC692958/LOC733131/LOC101746211/LOC733124/LOC692896/LOC101745780/LOC732998/LOC101745852/LOC778515/LOC732922/LOC101736622/LOC732870/LOC100101166/LOC101740220/LOC101747034/LOC732999/LOC732876/LOC101737187	19
	GO:0000502	CC	GO:0000502	proteasome complex	18/63	32/3687	4.36129358381971e-25	9.1587165260214e-24	4.13175181625025e-24	LOC101746822/LOC692958/LOC733131/LOC101746211/LOC733124/LOC692896/LOC732998/LOC101745852/LOC778515/LOC732922/LOC101736622/LOC732870/LOC100101166/LOC101740220/LOC101747034/LOC732999/LOC732876/LOC101737187	18
	GO:1905368	CC	GO:1905368	peptidase complex	19/63	45/3687	2.41729209197104e-23	3.80723504485439e-22	1.71754964429521e-22	LOC101746822/LOC692958/LOC733131/LOC101746211/LOC733124/LOC692896/LOC101745780/LOC732998/LOC101745852/LOC778515/LOC732922/LOC101736622/LOC732870/LOC100101166/LOC101740220/LOC101747034/LOC732999/LOC732876/LOC101737187	19
	GO:0005839	CC	GO:0005839	proteasome core complex	11/63	14/3687	5.10225732605005e-18	6.42884423082307e-17	2.90023048007056e-17	LOC101746822/LOC733124/LOC692896/LOC732998/LOC101745852/LOC732922/LOC101736622/LOC100101166/LOC101740220/LOC732999/LOC732876	11
	GO:0070469	CC	GO:0070469	respirasome	13/63	51/3687	8.39151521626684e-13	8.81109097708018e-12	3.97492826033692e-12	LOC101742612/LOC101743287/LOC100134921/Uccr/LOC778510/LOC101743106/LOC100134927/LOC101738548/LOC101744608/LOC733018/LOC780848/LOC101745480/LOC101742176	13
	GO:0005743	CC	GO:0005743	mitochondrial inner membrane	17/63	114/3687	2.01123710452594e-12	1.81011339407334e-11	8.16592508604516e-12	LOC101742612/LOC101743287/LOC100134921/Uccr/LOC778510/LOC101743106/LOC100134927/LOC692925/LOC101738548/LOC100101181/LOC101744608/LOC733018/LOC693108/LOC693099/LOC780848/LOC101745480/Ant	17
	GO:0019866	CC	GO:0019866	organelle inner membrane	17/63	116/3687	2.69891170589671e-12	2.12539296839366e-11	9.58823895515935e-12	LOC101742612/LOC101743287/LOC100134921/Uccr/LOC778510/LOC101743106/LOC100134927/LOC692925/LOC101738548/LOC100101181/LOC101744608/LOC733018/LOC693108/LOC693099/LOC780848/LOC101745480/Ant	17
	GO:0140535	CC	GO:0140535	intracellular protein-containing complex	18/63	149/3687	1.61810329047157e-11	1.1326723033301e-10	5.10979986464706e-11	LOC101746822/LOC692958/LOC733131/LOC101746211/LOC733124/LOC692896/LOC732998/LOC101745852/LOC778515/LOC732922/LOC101736622/LOC732870/LOC100101166/LOC101740220/LOC101747034/LOC732999/LOC732876/LOC101737187	18
	GO:0031966	CC	GO:0031966	mitochondrial membrane	17/63	137/3687	4.30557763903849e-11	2.71251391259425e-10	1.22369048688462e-10	LOC101742612/LOC101743287/LOC100134921/Uccr/LOC778510/LOC101743106/LOC100134927/LOC692925/LOC101738548/LOC100101181/LOC101744608/LOC733018/LOC693108/LOC693099/LOC780848/LOC101745480/Ant	17
	GO:0098796	CC	GO:0098796	membrane protein complex	17/63	142/3687	7.73772348026652e-11	4.43160526597082e-10	1.99922042073872e-10	LOC101743287/LOC101736101/LOC101745402/LOC101745780/Uccr/LOC778510/LOC100134927/LOC692925/LOC101738548/Atpsyn-beta/LOC100101181/LOC100101165/LOC101744608/LOC692926/LOC780848/LOC101745480/LOC101742176	17
	GO:0005740	CC	GO:0005740	mitochondrial envelope	17/63	145/3687	1.08728189753291e-10	5.70822996204779e-10	2.57514133626216e-10	LOC101742612/LOC101743287/LOC100134921/Uccr/LOC778510/LOC101743106/LOC100134927/LOC692925/LOC101738548/LOC100101181/LOC101744608/LOC733018/LOC693108/LOC693099/LOC780848/LOC101745480/Ant	17
	GO:0005739	CC	GO:0005739	mitochondrion	21/63	240/3687	1.21673779117971e-10	5.89649852648628e-10	2.66007452322689e-10	LOC101742612/LOC101743287/LOC100174851/LOC100134921/Uccr/LOC778510/LOC101743106/LOC100134927/LOC692925/LOC101738548/LOC100101181/LOC101744608/LOC101736533/LOC733018/LOC101742303/LOC693108/LOC693099/LOC780848/LOC101745480/Ant/LOC692811	21
	GO:0031967	CC	GO:0031967	organelle envelope	17/63	160/3687	5.30147664367596e-10	2.2266201903439e-09	1.00449031143334e-09	LOC101742612/LOC101743287/LOC100134921/Uccr/LOC778510/LOC101743106/LOC100134927/LOC692925/LOC101738548/LOC100101181/LOC101744608/LOC733018/LOC693108/LOC693099/LOC780848/LOC101745480/Ant	17
	GO:0031975	CC	GO:0031975	envelope	17/63	160/3687	5.30147664367596e-10	2.2266201903439e-09	1.00449031143334e-09	LOC101742612/LOC101743287/LOC100134921/Uccr/LOC778510/LOC101743106/LOC100134927/LOC692925/LOC101738548/LOC100101181/LOC101744608/LOC733018/LOC693108/LOC693099/LOC780848/LOC101745480/Ant	17
	GO:0098803	CC	GO:0098803	respiratory chain complex	9/63	30/3687	7.45090686976558e-10	2.9337945799702e-09	1.32351635186625e-09	LOC101743287/Uccr/LOC778510/LOC100134927/LOC101738548/LOC101744608/LOC780848/LOC101745480/LOC101742176	9
	GO:0098800	CC	GO:0098800	inner mitochondrial membrane protein complex	10/63	43/3687	1.2535241659404e-09	4.64541308554385e-09	2.0956750761852e-09	LOC101743287/Uccr/LOC778510/LOC100134927/LOC692925/LOC101738548/LOC100101181/LOC101744608/LOC780848/LOC101745480	10
	GO:0005746	CC	GO:0005746	mitochondrial respirasome	8/63	26/3687	5.65699274508687e-09	1.97994746078041e-08	8.9320938080319e-09	LOC101743287/Uccr/LOC778510/LOC100134927/LOC101738548/LOC101744608/LOC780848/LOC101745480	8
	GO:0098798	CC	GO:0098798	mitochondrial protein-containing complex	10/63	53/3687	1.11654341172557e-08	3.70222289151109e-08	1.67017574053132e-08	LOC101743287/Uccr/LOC778510/LOC100134927/LOC692925/LOC101738548/LOC100101181/LOC101744608/LOC780848/LOC101745480	10
	GO:0031090	CC	GO:0031090	organelle membrane	22/63	344/3687	1.67362190905074e-08	5.27190901350982e-08	2.37830481812473e-08	LOC101742612/LOC101743287/LOC101736101/LOC100134921/LOC101745402/LOC101745780/Uccr/LOC778510/LOC101743106/LOC100134927/LOC692925/LOC101738548/LOC778504/LOC100101181/LOC101744608/LOC733018/LOC693108/LOC693099/LOC780848/LOC101745480/LOC101743845/Ant	22
	GO:0070069	CC	GO:0070069	cytochrome complex	6/63	22/3687	1.17821261561679e-06	3.53463784685036e-06	1.59457346474452e-06	LOC101743287/Uccr/LOC100134927/LOC101738548/LOC101744608/LOC780848	6
	GO:0005751	CC	GO:0005751	mitochondrial respiratory chain complex IV	5/63	13/3687	1.43737914464343e-06	4.11613118693345e-06	1.8569012873384e-06	LOC101743287/LOC100134927/LOC101738548/LOC101744608/LOC780848	5
	GO:0045259	CC	GO:0045259	proton-transporting ATP synthase complex	5/63	15/3687	3.26652322352417e-06	8.57462346175096e-06	3.86825118575231e-06	LOC692925/Atpsyn-beta/LOC100101181/LOC100101165/LOC692926	5
	GO:0045277	CC	GO:0045277	respiratory chain complex IV	5/63	15/3687	3.26652322352417e-06	8.57462346175096e-06	3.86825118575231e-06	LOC101743287/LOC100134927/LOC101738548/LOC101744608/LOC780848	5
	GO:0016469	CC	GO:0016469	proton-transporting two-sector ATPase complex	5/63	27/3687	7.49671835930744e-05	0.000188917302654548	8.52258508216004e-05	LOC692925/Atpsyn-beta/LOC100101181/LOC100101165/LOC692926	5
	GO:1904949	CC	GO:1904949	ATPase complex	5/63	32/3687	0.000175091124466517	0.000424259263130407	0.000191395156299432	LOC692925/Atpsyn-beta/LOC100101181/LOC100101165/LOC692926	5
	GO:1990204	CC	GO:1990204	oxidoreductase complex	4/63	20/3687	0.000305572016943675	0.000713001372868574	0.000321654754677552	Uccr/LOC778510/LOC101745480/LOC101742176	4
	GO:0033178	CC	GO:0033178	proton-transporting two-sector ATPase complex, catalytic domain	3/63	12/3687	0.000937345382077128	0.00210902710967354	0.000951440801356484	Atpsyn-beta/LOC100101165/LOC692926	3
	GO:0140534	CC	GO:0140534	endoplasmic reticulum protein-containing complex	3/63	18/3687	0.00323126938200304	0.00701965417469625	0.00316676128181786	LOC101736101/LOC101745402/LOC101745780	3
	GO:0005759	CC	GO:0005759	mitochondrial matrix	3/63	25/3687	0.0083652182320144	0.0175669582872302	0.00792494358822416	LOC101736533/LOC101745480/LOC692811	3
	GO:1902495	CC	GO:1902495	transmembrane transporter complex	3/63	34/3687	0.0195216305693805	0.0384332101834679	0.0173382903083314	Uccr/LOC778510/LOC101745480	3
	GO:1990351	CC	GO:1990351	transporter complex	3/63	34/3687	0.0195216305693805	0.0384332101834679	0.0173382903083314	Uccr/LOC778510/LOC101745480	3
	GO:0033177	CC	GO:0033177	proton-transporting two-sector ATPase complex, proton-transporting domain	2/63	14/3687	0.0229138660342808	0.0437446533381724	0.019734430077371	LOC692925/LOC100101181	2
	GO:0015078	MF	GO:0015078	proton transmembrane transporter activity	6/56	41/4109	1.51794826313284e-05	0.00105783330668014	0.000851506686491756	LOC100134921/LOC692925/Atpsyn-beta/LOC100101181/LOC100101165/LOC692926	6
	GO:0009055	MF	GO:0009055	electron transfer activity	5/56	26/4109	2.07418295427479e-05	0.00105783330668014	0.000851506686491756	LOC100134921/LOC732995/LOC101738954/LOC101742176/LOC692811	5
	GO:0016491	MF	GO:0016491	oxidoreductase activity	14/56	375/4109	0.000357045740268485	0.00933970629972116	0.00751802983878484	Sod2/LOC100134921/LOC732995/LOC101738548/LOC692845/LOC733095/GSTo1/LOC101739568/LOC101738954/LOC692844/LOC101742176/LOC101736565/LOC692811/LOC733003	14
	GO:0015252	MF	GO:0015252	proton channel activity	3/56	11/4109	0.000366262992145928	0.00933970629972116	0.00751802983878484	Atpsyn-beta/LOC100101165/LOC692926	3
	GO:0022890	MF	GO:0022890	inorganic cation transmembrane transporter activity	6/56	83/4109	0.000820326715011153	0.0167346649862275	0.0134706281622884	LOC100134921/LOC692925/Atpsyn-beta/LOC100101181/LOC100101165/LOC692926	6
	GO:0015453	MF	GO:0015453	oxidoreduction-driven active transmembrane transporter activity	3/56	18/4109	0.0016926924630032	0.0287757718710544	0.0231631600200438	LOC100134921/LOC732995/LOC101738954	3
	GO:0015318	MF	GO:0015318	inorganic molecular entity transmembrane transporter activity	6/56	101/4109	0.00228129930580178	0.0332417898845402	0.0267580971206825	LOC100134921/LOC692925/Atpsyn-beta/LOC100101181/LOC100101165/LOC692926	6
	GO:0008324	MF	GO:0008324	monoatomic cation transmembrane transporter activity	6/56	104/4109	0.00264699686850866	0.0337492100734855	0.0271665468083784	LOC100134921/LOC692925/Atpsyn-beta/LOC100101181/LOC100101165/LOC692926	6
	GO:0016209	MF	GO:0016209	antioxidant activity	3/56	22/4109	0.00307355965291145	0.0348336760663298	0.0280394915704203	Sod2/GSTo1/LOC733003	3

[truncated: 3 more sheets: 10-module 10, 11-module 11, 12-module 12]
