# Supplementary material for: A silkworm model reveals coordinated cellular communities and conserved Hippo regulation in silk production
Source: Research Square preprint supplement (doi:10.21203/rs.3.rs-7747598/v1), 2025-10-01
Supplement: Supplementary file 73 [file Supplementary Data 8.xlsx]

## Sheet: main
Supplementary Data 8.Regulatory networks in Module 1, 5 and 10 and enrichment analysis of the target genes of TFs in Module 5.
1	module 1
2	module 5
3	module 10

## Sheet: 1-module 1
	regulatoryGene	targetGene	weight
1	KWMTBOMO00678	KWMTBOMO07658	0.0651876402187664
2	KWMTBOMO00678	KWMTBOMO06751	0.171014426504751
3	KWMTBOMO00678	KWMTBOMO04131	0.0949727591835851
4	KWMTBOMO00678	KWMTBOMO11773	0.0735001598028787
5	KWMTBOMO00678	KWMTBOMO09538	0.17342306728776
6	KWMTBOMO00678	KWMTBOMO13411	0.126583943359886
7	KWMTBOMO00678	KWMTBOMO07243	0.0761569989446978
8	KWMTBOMO00678	KWMTBOMO13319	0.108115939330217
9	KWMTBOMO00678	KWMTBOMO12386	0.133990885704105
10	KWMTBOMO00678	KWMTBOMO02562	0.120129573154622
11	KWMTBOMO00678	KWMTBOMO08565	0.111094124973205
12	KWMTBOMO00678	KWMTBOMO03484	0.0645090510752983
13	KWMTBOMO00678	KWMTBOMO11041	0.0849856175802979
14	KWMTBOMO00678	KWMTBOMO04179	0.0852199142689417
15	KWMTBOMO00678	KWMTBOMO07278	0.0546559686897967
16	KWMTBOMO00678	KWMTBOMO00748	0.146751106737088
17	KWMTBOMO00678	KWMTBOMO00006	0.0942460445364783
18	KWMTBOMO00678	KWMTBOMO00620	0.082246551679092
19	KWMTBOMO00678	KWMTBOMO11072	0.0824299457263441
20	KWMTBOMO00678	KWMTBOMO08590	0.111662853285595
21	KWMTBOMO00678	KWMTBOMO14942	0.131759447076149
22	KWMTBOMO00678	KWMTBOMO02626	0.112171187290669
23	KWMTBOMO00678	KWMTBOMO03208	0.0678932033972441
24	KWMTBOMO00678	KWMTBOMO08668	0.120343020100206
25	KWMTBOMO00678	KWMTBOMO08563	0.107542328230645
26	KWMTBOMO00678	KWMTBOMO01001	0.0595518484473157
27	KWMTBOMO00678	KWMTBOMO06347	0.0749120769387479
28	KWMTBOMO00678	KWMTBOMO15088	0.108573284632885
29	KWMTBOMO00678	KWMTBOMO04757	0.0694161848396477
30	KWMTBOMO00678	KWMTBOMO04663	0.126324759417996
31	KWMTBOMO00678	KWMTBOMO01592	0.0907954763851174
32	KWMTBOMO00678	KWMTBOMO03533	0.0851663972284079
33	KWMTBOMO00678	KWMTBOMO08059	0.119901288423845
34	KWMTBOMO00678	KWMTBOMO01065	0.103766951226561
35	KWMTBOMO00678	KWMTBOMO14621	0.0810188033444645
36	KWMTBOMO00678	KWMTBOMO10439	0.0683652444202419
37	KWMTBOMO00678	KWMTBOMO15489	0.100254903757841
38	KWMTBOMO00678	KWMTBOMO04786	0.0910433945207645
39	KWMTBOMO00678	KWMTBOMO01095	0.0834237617846217
40	KWMTBOMO00678	KWMTBOMO08041	0.103586308214031
41	KWMTBOMO00678	KWMTBOMO00277	0.0835857857546383
42	KWMTBOMO00678	KWMTBOMO04877	0.147536156445934
43	KWMTBOMO00678	KWMTBOMO13770	0.0892353000358416
44	KWMTBOMO00678	KWMTBOMO02563	0.054837697022604
45	KWMTBOMO00678	KWMTBOMO10639	0.0670387166864804
46	KWMTBOMO00678	KWMTBOMO01177	0.166317578444874
47	KWMTBOMO00678	KWMTBOMO05115	0.114106080963976
48	KWMTBOMO00678	KWMTBOMO08974	0.0651625362408003
49	KWMTBOMO00678	KWMTBOMO15788	0.0857011284903362
50	KWMTBOMO00678	KWMTBOMO09593	0.116445380862685
51	KWMTBOMO00678	KWMTBOMO01591	0.0788539836844392
52	KWMTBOMO00678	KWMTBOMO04339	0.113338011186072
53	KWMTBOMO00678	KWMTBOMO04715	0.0650037628541915
54	KWMTBOMO00678	KWMTBOMO08566	0.155121105051243
55	KWMTBOMO00678	KWMTBOMO15916	0.172502770904645
56	KWMTBOMO00678	KWMTBOMO06311	0.156249967645109
57	KWMTBOMO00678	KWMTBOMO09597	0.0626468378909422
58	KWMTBOMO00678	KWMTBOMO16094	0.0623118463528952
59	KWMTBOMO00678	KWMTBOMO14664	0.124842841569593
60	KWMTBOMO00678	KWMTBOMO07707	0.111412617436593
61	KWMTBOMO00678	KWMTBOMO02078	0.113904418628455
62	KWMTBOMO00678	KWMTBOMO00973	0.0712489261060387
63	KWMTBOMO00678	KWMTBOMO09709	0.111296000629322
64	KWMTBOMO00678	KWMTBOMO16118	0.0846067470201753
65	KWMTBOMO00678	KWMTBOMO03453	0.0531876644376626
66	KWMTBOMO00678	KWMTBOMO15675	0.176593590807018
67	KWMTBOMO00678	KWMTBOMO06453	0.0901176865281377
68	KWMTBOMO00678	KWMTBOMO02441	0.129498150058874
69	KWMTBOMO00678	KWMTBOMO09762	0.0543017725198943
70	KWMTBOMO00678	KWMTBOMO10348	0.118642537341921
71	KWMTBOMO00678	KWMTBOMO02451	0.118304859019144
72	KWMTBOMO00678	KWMTBOMO06657	0.119864926224134
73	KWMTBOMO00678	KWMTBOMO08734	0.0944757285409197
74	KWMTBOMO00678	KWMTBOMO16145	0.073058666241679
75	KWMTBOMO00902	KWMTBOMO03484	0.2445083866658
76	KWMTBOMO00902	KWMTBOMO00277	0.261125109912726
77	KWMTBOMO00902	KWMTBOMO03533	0.262500512124087
78	KWMTBOMO00902	KWMTBOMO08041	0.162311466086391
79	KWMTBOMO00902	KWMTBOMO04663	0.082024321265571
80	KWMTBOMO00902	KWMTBOMO04131	0.159169071145418
81	KWMTBOMO00902	KWMTBOMO15916	0.105216433652517
82	KWMTBOMO00902	KWMTBOMO01591	0.184407069199461
83	KWMTBOMO00902	KWMTBOMO00973	0.240843719567317
84	KWMTBOMO00902	KWMTBOMO09538	0.0987843496151427
85	KWMTBOMO00902	KWMTBOMO13411	0.149449145844291
86	KWMTBOMO00902	KWMTBOMO04786	0.22419621723204
87	KWMTBOMO00902	KWMTBOMO06751	0.10048187614068
88	KWMTBOMO00902	KWMTBOMO08566	0.122570227596747
89	KWMTBOMO00902	KWMTBOMO08059	0.115201485790245
90	KWMTBOMO00902	KWMTBOMO03208	0.364784981513045
91	KWMTBOMO00902	KWMTBOMO15675	0.0876770911506952
92	KWMTBOMO00902	KWMTBOMO06453	0.31114979366693
93	KWMTBOMO00902	KWMTBOMO04715	0.26404630037555
94	KWMTBOMO00902	KWMTBOMO00620	0.390608882990282
95	KWMTBOMO00902	KWMTBOMO16094	0.333048521983589
96	KWMTBOMO00902	KWMTBOMO02563	0.155225120019384
97	KWMTBOMO00902	KWMTBOMO06311	0.122575699646826
98	KWMTBOMO00902	KWMTBOMO01095	0.107450905476278
99	KWMTBOMO00902	KWMTBOMO11041	0.234897129506554
100	KWMTBOMO00902	KWMTBOMO14621	0.301488751673009
101	KWMTBOMO00902	KWMTBOMO11773	0.331553230908354
102	KWMTBOMO00902	KWMTBOMO08668	0.230097176948529
103	KWMTBOMO00902	KWMTBOMO15088	0.28969599437651
104	KWMTBOMO00902	KWMTBOMO14664	0.110809198895099
105	KWMTBOMO00902	KWMTBOMO08563	0.23853261731654
106	KWMTBOMO00902	KWMTBOMO10639	0.320188308594499
107	KWMTBOMO00902	KWMTBOMO02451	0.126652210126311
108	KWMTBOMO00902	KWMTBOMO00006	0.121802967306806
109	KWMTBOMO00902	KWMTBOMO03453	0.330585382712468
110	KWMTBOMO00902	KWMTBOMO13770	0.298120992205954
111	KWMTBOMO00902	KWMTBOMO02078	0.106807679944075
112	KWMTBOMO00902	KWMTBOMO07707	0.0843420924313475
113	KWMTBOMO00902	KWMTBOMO16118	0.3406722986882
114	KWMTBOMO00902	KWMTBOMO09597	0.41881978436466
115	KWMTBOMO00902	KWMTBOMO10439	0.3955294860559
116	KWMTBOMO00902	KWMTBOMO02441	0.135646499151515
117	KWMTBOMO00902	KWMTBOMO09593	0.259075586319199
118	KWMTBOMO00902	KWMTBOMO11072	0.158112266927661
119	KWMTBOMO00902	KWMTBOMO04757	0.268229969219009
120	KWMTBOMO00902	KWMTBOMO04877	0.112547684218066
121	KWMTBOMO00902	KWMTBOMO14942	0.12099287515256
122	KWMTBOMO00902	KWMTBOMO06657	0.315843880966054
123	KWMTBOMO00902	KWMTBOMO09709	0.116594872847206
124	KWMTBOMO00902	KWMTBOMO05115	0.161401086141703
125	KWMTBOMO00902	KWMTBOMO08590	0.0946592996654733
126	KWMTBOMO00902	KWMTBOMO08974	0.230520615842389
127	KWMTBOMO00902	KWMTBOMO15489	0.228679838572474
128	KWMTBOMO00902	KWMTBOMO04339	0.0942047766769394
129	KWMTBOMO00902	KWMTBOMO01592	0.167422215366182
130	KWMTBOMO00902	KWMTBOMO08565	0.137857476733058
131	KWMTBOMO00902	KWMTBOMO07278	0.362799291358364
132	KWMTBOMO00902	KWMTBOMO07658	0.331250361726483
133	KWMTBOMO00902	KWMTBOMO01001	0.128836947181948
134	KWMTBOMO00902	KWMTBOMO01065	0.262234603411167
135	KWMTBOMO00902	KWMTBOMO15788	0.382571364721327
136	KWMTBOMO00902	KWMTBOMO10348	0.0939260603306728
137	KWMTBOMO00902	KWMTBOMO13319	0.103093419424251
138	KWMTBOMO00902	KWMTBOMO00748	0.165038333743392
139	KWMTBOMO00902	KWMTBOMO02626	0.133460472592826
140	KWMTBOMO00902	KWMTBOMO02562	0.104999602563947
141	KWMTBOMO00902	KWMTBOMO01177	0.0976664267590821
142	KWMTBOMO00902	KWMTBOMO08734	0.162450587266871
143	KWMTBOMO00902	KWMTBOMO04179	0.152004097403555
144	KWMTBOMO00902	KWMTBOMO06347	0.154407893401912
145	KWMTBOMO00902	KWMTBOMO07243	0.144585527171743
146	KWMTBOMO00902	KWMTBOMO09762	0.344720299840319
147	KWMTBOMO00902	KWMTBOMO12386	0.105653545225604
148	KWMTBOMO00902	KWMTBOMO16145	0.170977934994761
149	KWMTBOMO02774	KWMTBOMO00006	0.171962224386259
150	KWMTBOMO02774	KWMTBOMO04786	0.150932646654672
151	KWMTBOMO02774	KWMTBOMO08059	0.115491157780106
152	KWMTBOMO02774	KWMTBOMO01591	0.122979452909939
153	KWMTBOMO02774	KWMTBOMO08563	0.11102453275029
154	KWMTBOMO02774	KWMTBOMO13411	0.21310057183525
155	KWMTBOMO02774	KWMTBOMO14621	0.144474030440213
156	KWMTBOMO02774	KWMTBOMO01095	0.0623194611166289
157	KWMTBOMO02774	KWMTBOMO15675	0.272263686128386
158	KWMTBOMO02774	KWMTBOMO08590	0.209881527456031
159	KWMTBOMO02774	KWMTBOMO04131	0.157287872254018
160	KWMTBOMO02774	KWMTBOMO00277	0.183158470002686
161	KWMTBOMO02774	KWMTBOMO08565	0.273010258039105
162	KWMTBOMO02774	KWMTBOMO01177	0.156182700718259
163	KWMTBOMO02774	KWMTBOMO09593	0.200730343425436
164	KWMTBOMO02774	KWMTBOMO04179	0.138408481073333
165	KWMTBOMO02774	KWMTBOMO03453	0.103607806376796
166	KWMTBOMO02774	KWMTBOMO00620	0.0623674482186184
167	KWMTBOMO02774	KWMTBOMO00748	0.136019014965916
168	KWMTBOMO02774	KWMTBOMO14942	0.156596982506822
169	KWMTBOMO02774	KWMTBOMO04339	0.130427998330806
170	KWMTBOMO02774	KWMTBOMO08566	0.171348324428293
171	KWMTBOMO02774	KWMTBOMO11072	0.131320903841685
172	KWMTBOMO02774	KWMTBOMO14664	0.153858428106195
173	KWMTBOMO02774	KWMTBOMO01592	0.115279117628687
174	KWMTBOMO02774	KWMTBOMO06347	0.276916289061083
175	KWMTBOMO02774	KWMTBOMO00973	0.143174912167127
176	KWMTBOMO02774	KWMTBOMO04663	0.212751535356112
177	KWMTBOMO02774	KWMTBOMO08668	0.0855991157364571
178	KWMTBOMO02774	KWMTBOMO15489	0.155065784945729
179	KWMTBOMO02774	KWMTBOMO01001	0.117348933361794
180	KWMTBOMO02774	KWMTBOMO06453	0.126456727411917
181	KWMTBOMO02774	KWMTBOMO08974	0.135409807415629
182	KWMTBOMO02774	KWMTBOMO04715	0.104140258130573
183	KWMTBOMO02774	KWMTBOMO12386	0.158212529096702
184	KWMTBOMO02774	KWMTBOMO08041	0.132811877236765
185	KWMTBOMO02774	KWMTBOMO01065	0.195106328921625
186	KWMTBOMO02774	KWMTBOMO08734	0.192972137827274
187	KWMTBOMO02774	KWMTBOMO04757	0.0933525764676439
188	KWMTBOMO02774	KWMTBOMO02451	0.1557229735904
189	KWMTBOMO02774	KWMTBOMO16145	0.0994910143779758
190	KWMTBOMO02774	KWMTBOMO03533	0.0916807790691375
191	KWMTBOMO02774	KWMTBOMO16094	0.0817773154434221
192	KWMTBOMO02774	KWMTBOMO07278	0.111313289139962
193	KWMTBOMO02774	KWMTBOMO10439	0.11613148808331
194	KWMTBOMO02774	KWMTBOMO05115	0.332612029103591
195	KWMTBOMO02774	KWMTBOMO09597	0.0883720111453387
196	KWMTBOMO02774	KWMTBOMO06751	0.282315937910486
197	KWMTBOMO02774	KWMTBOMO15788	0.105952191914312
198	KWMTBOMO02774	KWMTBOMO15916	0.169566947177167
199	KWMTBOMO02774	KWMTBOMO02563	0.121491777205451
200	KWMTBOMO02774	KWMTBOMO04877	0.136742784225353
201	KWMTBOMO02774	KWMTBOMO13319	0.164171368680596
202	KWMTBOMO02774	KWMTBOMO02078	0.204682088081453
203	KWMTBOMO02774	KWMTBOMO11773	0.154997315073469
204	KWMTBOMO02774	KWMTBOMO09709	0.167169780462579
205	KWMTBOMO02774	KWMTBOMO02626	0.337385241424555
206	KWMTBOMO02774	KWMTBOMO11041	0.13367801945949
207	KWMTBOMO02774	KWMTBOMO07243	0.105272355158591
208	KWMTBOMO02774	KWMTBOMO16118	0.074180014780595
209	KWMTBOMO02774	KWMTBOMO06657	0.163900959501849
210	KWMTBOMO02774	KWMTBOMO06311	0.114339714952385
211	KWMTBOMO02774	KWMTBOMO07707	0.228295250776058
212	KWMTBOMO02774	KWMTBOMO07658	0.126300169637951
213	KWMTBOMO02774	KWMTBOMO02562	0.230959592718422
214	KWMTBOMO02774	KWMTBOMO09762	0.135986548235989
215	KWMTBOMO02774	KWMTBOMO10348	0.327438361606796
216	KWMTBOMO02774	KWMTBOMO03208	0.141186357173217
217	KWMTBOMO02774	KWMTBOMO02441	0.171606921935706
218	KWMTBOMO02774	KWMTBOMO10639	0.128955556711917
219	KWMTBOMO02774	KWMTBOMO09538	0.197791576505508
220	KWMTBOMO02774	KWMTBOMO13770	0.15031894197661
221	KWMTBOMO02774	KWMTBOMO15088	0.105845610285504
222	KWMTBOMO02774	KWMTBOMO03484	0.136638462077295
223	KWMTBOMO10307	KWMTBOMO08590	0.192015122931475
224	KWMTBOMO10307	KWMTBOMO06311	0.254794237909586
225	KWMTBOMO10307	KWMTBOMO01095	0.20420455406203
226	KWMTBOMO10307	KWMTBOMO07243	0.276963974266511
227	KWMTBOMO10307	KWMTBOMO07278	0.227222501972556
228	KWMTBOMO10307	KWMTBOMO02562	0.189680709538471
229	KWMTBOMO10307	KWMTBOMO03208	0.186227524414934
230	KWMTBOMO10307	KWMTBOMO06751	0.143330607619979
231	KWMTBOMO10307	KWMTBOMO08563	0.163729092060894
232	KWMTBOMO10307	KWMTBOMO16094	0.251808791875569
233	KWMTBOMO10307	KWMTBOMO00006	0.282864267287488
234	KWMTBOMO10307	KWMTBOMO04339	0.214221781049251
235	KWMTBOMO10307	KWMTBOMO04663	0.25217505341985
236	KWMTBOMO10307	KWMTBOMO04786	0.240168557473651
237	KWMTBOMO10307	KWMTBOMO02441	0.21261129307299
238	KWMTBOMO10307	KWMTBOMO03533	0.183448165245656
239	KWMTBOMO10307	KWMTBOMO15916	0.186983923381044
240	KWMTBOMO10307	KWMTBOMO02078	0.194357
241	KWMTBOMO10307	KWMTBOMO03453	0.224143197659774
242	KWMTBOMO10307	KWMTBOMO00277	0.158547856808759
243	KWMTBOMO10307	KWMTBOMO01177	0.24058246528422
244	KWMTBOMO10307	KWMTBOMO00748	0.19996189511496
245	KWMTBOMO10307	KWMTBOMO06453	0.230929495171156
246	KWMTBOMO10307	KWMTBOMO01065	0.158650903458624
247	KWMTBOMO10307	KWMTBOMO15788	0.180769995397896
248	KWMTBOMO10307	KWMTBOMO15489	0.176239888121771
249	KWMTBOMO10307	KWMTBOMO02451	0.192410430839114
250	KWMTBOMO10307	KWMTBOMO06657	0.177025826749794
251	KWMTBOMO10307	KWMTBOMO05115	0.150482006708413
252	KWMTBOMO10307	KWMTBOMO04715	0.184670752479148
253	KWMTBOMO10307	KWMTBOMO13411	0.186382229791828
254	KWMTBOMO10307	KWMTBOMO14621	0.221724489193462
255	KWMTBOMO10307	KWMTBOMO11041	0.247680348256243
256	KWMTBOMO10307	KWMTBOMO10439	0.185632492549535
257	KWMTBOMO10307	KWMTBOMO10639	0.212364225157359
258	KWMTBOMO10307	KWMTBOMO09538	0.139937517012884
259	KWMTBOMO10307	KWMTBOMO15675	0.145575062800154
260	KWMTBOMO10307	KWMTBOMO08734	0.216090792742802
261	KWMTBOMO10307	KWMTBOMO00620	0.171249808407367
262	KWMTBOMO10307	KWMTBOMO07658	0.236848614680954
263	KWMTBOMO10307	KWMTBOMO08059	0.212277659955209
264	KWMTBOMO10307	KWMTBOMO07707	0.225720802165805
265	KWMTBOMO10307	KWMTBOMO08974	0.256061695516907
266	KWMTBOMO10307	KWMTBOMO11773	0.191129446782188
267	KWMTBOMO10307	KWMTBOMO04877	0.210297658832656
268	KWMTBOMO10307	KWMTBOMO14942	0.204059689883831
269	KWMTBOMO10307	KWMTBOMO01001	0.336315340179273
270	KWMTBOMO10307	KWMTBOMO16118	0.227883809634927
271	KWMTBOMO10307	KWMTBOMO15088	0.223201843249947
272	KWMTBOMO10307	KWMTBOMO11072	0.160981902652515
273	KWMTBOMO10307	KWMTBOMO03484	0.23299306756969
274	KWMTBOMO10307	KWMTBOMO00973	0.317143577457885
275	KWMTBOMO10307	KWMTBOMO13319	0.203250450674864
276	KWMTBOMO10307	KWMTBOMO09709	0.295483502789472
277	KWMTBOMO10307	KWMTBOMO10348	0.174744873226915
278	KWMTBOMO10307	KWMTBOMO02626	0.167646641961483
279	KWMTBOMO10307	KWMTBOMO04131	0.219791850058015
280	KWMTBOMO10307	KWMTBOMO01592	0.264258152428941
281	KWMTBOMO10307	KWMTBOMO01591	0.264569698416331
282	KWMTBOMO10307	KWMTBOMO09597	0.239224151465639
283	KWMTBOMO10307	KWMTBOMO08041	0.302100576731343
284	KWMTBOMO10307	KWMTBOMO13770	0.201834606926878
285	KWMTBOMO10307	KWMTBOMO14664	0.233339649886429
286	KWMTBOMO10307	KWMTBOMO08668	0.186208388040169
287	KWMTBOMO10307	KWMTBOMO09593	0.219297094131425
288	KWMTBOMO10307	KWMTBOMO06347	0.224892927476434
289	KWMTBOMO10307	KWMTBOMO04179	0.278101340835093
290	KWMTBOMO10307	KWMTBOMO16145	0.301511396690757
291	KWMTBOMO10307	KWMTBOMO09762	0.268450404273494
292	KWMTBOMO10307	KWMTBOMO08566	0.174077590356963
293	KWMTBOMO10307	KWMTBOMO12386	0.180797313121955
294	KWMTBOMO10307	KWMTBOMO08565	0.150762929260664
295	KWMTBOMO10307	KWMTBOMO02563	0.27161769085597
296	KWMTBOMO10307	KWMTBOMO04757	0.128056089828876
297	KWMTBOMO11087	KWMTBOMO00006	0.232003402553631
298	KWMTBOMO11087	KWMTBOMO09593	0.127994878189478
299	KWMTBOMO11087	KWMTBOMO08059	0.344610083468315
300	KWMTBOMO11087	KWMTBOMO15675	0.243443315016755
301	KWMTBOMO11087	KWMTBOMO15088	0.1335163565259
302	KWMTBOMO11087	KWMTBOMO15489	0.223217693725984
303	KWMTBOMO11087	KWMTBOMO07658	0.146829787109605
304	KWMTBOMO11087	KWMTBOMO01177	0.261648762264554
305	KWMTBOMO11087	KWMTBOMO04786	0.155669297997876
306	KWMTBOMO11087	KWMTBOMO10639	0.158830029538134
307	KWMTBOMO11087	KWMTBOMO00620	0.216650505173439
308	KWMTBOMO11087	KWMTBOMO04663	0.240618721030163
309	KWMTBOMO11087	KWMTBOMO06453	0.15983001320724
310	KWMTBOMO11087	KWMTBOMO10439	0.123186990340003
311	KWMTBOMO11087	KWMTBOMO04339	0.338315184319756
312	KWMTBOMO11087	KWMTBOMO12386	0.329088500400544
313	KWMTBOMO11087	KWMTBOMO00277	0.185436831576142
314	KWMTBOMO11087	KWMTBOMO06751	0.21667414663892
315	KWMTBOMO11087	KWMTBOMO16145	0.231438833273975
316	KWMTBOMO11087	KWMTBOMO06347	0.157614537810894
317	KWMTBOMO11087	KWMTBOMO03533	0.250767675369688
318	KWMTBOMO11087	KWMTBOMO04179	0.231556596642857
319	KWMTBOMO11087	KWMTBOMO00973	0.166507598568594
320	KWMTBOMO11087	KWMTBOMO03453	0.171569357551371
321	KWMTBOMO11087	KWMTBOMO07707	0.248306628444604
322	KWMTBOMO11087	KWMTBOMO02562	0.228680786028526
323	KWMTBOMO11087	KWMTBOMO14621	0.123398809515594
324	KWMTBOMO11087	KWMTBOMO04131	0.240701874871957
325	KWMTBOMO11087	KWMTBOMO09538	0.297590125506743
326	KWMTBOMO11087	KWMTBOMO02626	0.175146532181733
327	KWMTBOMO11087	KWMTBOMO09762	0.09868779306817
328	KWMTBOMO11087	KWMTBOMO13319	0.309661396189763
329	KWMTBOMO11087	KWMTBOMO02451	0.320458479246193
330	KWMTBOMO11087	KWMTBOMO08590	0.326424825940136
331	KWMTBOMO11087	KWMTBOMO14664	0.273362519468296
332	KWMTBOMO11087	KWMTBOMO11041	0.230718511481555
333	KWMTBOMO11087	KWMTBOMO08974	0.191092368060862
334	KWMTBOMO11087	KWMTBOMO07278	0.160342340118647
335	KWMTBOMO11087	KWMTBOMO08566	0.273329130307197
336	KWMTBOMO11087	KWMTBOMO13411	0.254048002633913
337	KWMTBOMO11087	KWMTBOMO09597	0.113173528967945
338	KWMTBOMO11087	KWMTBOMO00748	0.263567908311993
339	KWMTBOMO11087	KWMTBOMO01001	0.255475533168986
340	KWMTBOMO11087	KWMTBOMO01095	0.464389248371189
341	KWMTBOMO11087	KWMTBOMO13770	0.171760788464341
342	KWMTBOMO11087	KWMTBOMO11773	0.148829684626988
343	KWMTBOMO11087	KWMTBOMO03484	0.16391556310282
344	KWMTBOMO11087	KWMTBOMO01065	0.176376310816732
345	KWMTBOMO11087	KWMTBOMO01591	0.276770463740582
346	KWMTBOMO11087	KWMTBOMO15788	0.11083591301258
347	KWMTBOMO11087	KWMTBOMO04715	0.233673455554117
348	KWMTBOMO11087	KWMTBOMO08668	0.269786766415979
349	KWMTBOMO11087	KWMTBOMO08734	0.256036443187888
350	KWMTBOMO11087	KWMTBOMO16118	0.194300166072985
351	KWMTBOMO11087	KWMTBOMO02441	0.251555745780393
352	KWMTBOMO11087	KWMTBOMO06311	0.24080883297805
353	KWMTBOMO11087	KWMTBOMO15916	0.288555076472349
354	KWMTBOMO11087	KWMTBOMO03208	0.116016249743376
355	KWMTBOMO11087	KWMTBOMO02563	0.283139985340551
356	KWMTBOMO11087	KWMTBOMO07243	0.331121541248197
357	KWMTBOMO11087	KWMTBOMO02078	0.258766859292379
358	KWMTBOMO11087	KWMTBOMO16094	0.197909939610499
359	KWMTBOMO11087	KWMTBOMO08565	0.224828110823153
360	KWMTBOMO11087	KWMTBOMO05115	0.13387571933482
361	KWMTBOMO11087	KWMTBOMO11072	0.348339633160105
362	KWMTBOMO11087	KWMTBOMO08563	0.282567648169174
363	KWMTBOMO11087	KWMTBOMO01592	0.279157746104851
364	KWMTBOMO11087	KWMTBOMO09709	0.234888586030409
365	KWMTBOMO11087	KWMTBOMO08041	0.229633646535808
366	KWMTBOMO11087	KWMTBOMO04877	0.301279451676146
367	KWMTBOMO11087	KWMTBOMO10348	0.192833021808228
368	KWMTBOMO11087	KWMTBOMO14942	0.310150748450578
369	KWMTBOMO11087	KWMTBOMO04757	0.324453489934244
370	KWMTBOMO11087	KWMTBOMO06657	0.107730680191509
371	KWMTBOMO14484	KWMTBOMO01592	0.083087292086222
372	KWMTBOMO14484	KWMTBOMO08041	0.0695561251956621
373	KWMTBOMO14484	KWMTBOMO04877	0.0915962646018454
374	KWMTBOMO14484	KWMTBOMO00006	0.0971210939293377
375	KWMTBOMO14484	KWMTBOMO07243	0.0658996032102604
376	KWMTBOMO14484	KWMTBOMO02451	0.0864510471788381
377	KWMTBOMO14484	KWMTBOMO13411	0.0704361065348317
378	KWMTBOMO14484	KWMTBOMO11041	0.0680403737158603
379	KWMTBOMO14484	KWMTBOMO02626	0.074189924548735
380	KWMTBOMO14484	KWMTBOMO02078	0.121482410837638
381	KWMTBOMO14484	KWMTBOMO07658	0.0935834266262411
382	KWMTBOMO14484	KWMTBOMO08563	0.0966037814724579
383	KWMTBOMO14484	KWMTBOMO14664	0.103787362074387
384	KWMTBOMO14484	KWMTBOMO04131	0.128076572487006
385	KWMTBOMO14484	KWMTBOMO10348	0.092415145685467
386	KWMTBOMO14484	KWMTBOMO08734	0.0779743104342453
387	KWMTBOMO14484	KWMTBOMO16118	0.078356963803118
388	KWMTBOMO14484	KWMTBOMO09593	0.0764567170717769
389	KWMTBOMO14484	KWMTBOMO01095	0.0782120691892517
390	KWMTBOMO14484	KWMTBOMO00620	0.0768768035312021
391	KWMTBOMO14484	KWMTBOMO02562	0.125549735996012
392	KWMTBOMO14484	KWMTBOMO12386	0.0922572264510895
393	KWMTBOMO14484	KWMTBOMO09597	0.0777636861654756
394	KWMTBOMO14484	KWMTBOMO04786	0.137989886120995
395	KWMTBOMO14484	KWMTBOMO08974	0.121752976923413
396	KWMTBOMO14484	KWMTBOMO03484	0.157435469509097
397	KWMTBOMO14484	KWMTBOMO16094	0.0731435847340267
398	KWMTBOMO14484	KWMTBOMO15788	0.134169406463549
399	KWMTBOMO14484	KWMTBOMO06347	0.11125627531093
400	KWMTBOMO14484	KWMTBOMO07278	0.0836666087206738
401	KWMTBOMO14484	KWMTBOMO08566	0.103553622259557
402	KWMTBOMO14484	KWMTBOMO01591	0.0724193320492472
403	KWMTBOMO14484	KWMTBOMO06311	0.111231546868045
404	KWMTBOMO14484	KWMTBOMO14621	0.127895115833258
405	KWMTBOMO14484	KWMTBOMO00748	0.0886617411266505
406	KWMTBOMO14484	KWMTBOMO11072	0.118815347691689
407	KWMTBOMO14484	KWMTBOMO08059	0.0925183245822799
408	KWMTBOMO14484	KWMTBOMO01065	0.10386490216529
409	KWMTBOMO14484	KWMTBOMO13319	0.111707425700311
410	KWMTBOMO14484	KWMTBOMO15088	0.139166910929255
411	KWMTBOMO14484	KWMTBOMO15489	0.116541890876202
412	KWMTBOMO14484	KWMTBOMO06657	0.11563372636666
413	KWMTBOMO14484	KWMTBOMO04715	0.14846547060642
414	KWMTBOMO14484	KWMTBOMO14942	0.0764402569300605
415	KWMTBOMO14484	KWMTBOMO01001	0.102471397660684
416	KWMTBOMO14484	KWMTBOMO06453	0.0815162840146194
417	KWMTBOMO14484	KWMTBOMO04663	0.0861056095103077
418	KWMTBOMO14484	KWMTBOMO09762	0.0978531820621335
419	KWMTBOMO14484	KWMTBOMO15916	0.0771748484122779
420	KWMTBOMO14484	KWMTBOMO03208	0.123891683758184
421	KWMTBOMO14484	KWMTBOMO13770	0.0887293703903751
422	KWMTBOMO14484	KWMTBOMO08590	0.0653563707212894
423	KWMTBOMO14484	KWMTBOMO04179	0.114709569776221
424	KWMTBOMO14484	KWMTBOMO02563	0.11368772955604
425	KWMTBOMO14484	KWMTBOMO06751	0.0861830051851826
426	KWMTBOMO14484	KWMTBOMO10439	0.111154298551009
427	KWMTBOMO14484	KWMTBOMO07707	0.101922608745592
428	KWMTBOMO14484	KWMTBOMO03533	0.126436470963024
429	KWMTBOMO14484	KWMTBOMO04339	0.109492248437176
430	KWMTBOMO14484	KWMTBOMO01177	0.0776020665290115
431	KWMTBOMO14484	KWMTBOMO15675	0.0744472540969906
432	KWMTBOMO14484	KWMTBOMO00973	0.0610812661330383
433	KWMTBOMO14484	KWMTBOMO09538	0.0924733640719622
434	KWMTBOMO14484	KWMTBOMO08668	0.10796553275866
435	KWMTBOMO14484	KWMTBOMO16145	0.123522154420852
436	KWMTBOMO14484	KWMTBOMO08565	0.102447100170815
437	KWMTBOMO14484	KWMTBOMO03453	0.116906591261928
438	KWMTBOMO14484	KWMTBOMO09709	0.0745672572410113
439	KWMTBOMO14484	KWMTBOMO05115	0.107523077747497
440	KWMTBOMO14484	KWMTBOMO10639	0.11262316331161
441	KWMTBOMO14484	KWMTBOMO04757	0.116491689710579
442	KWMTBOMO14484	KWMTBOMO00277	0.128145945945048
443	KWMTBOMO14484	KWMTBOMO02441	0.0990813900005226
444	KWMTBOMO14484	KWMTBOMO11773	0.0999901628061225

## Sheet: 2-module 5
	regulatoryGene	targetGene	weight
1	KWMTBOMO00833	KWMTBOMO12479	0.0288449307299399
2	KWMTBOMO00833	KWMTBOMO05526	0.0274189751612973
3	KWMTBOMO00833	KWMTBOMO09408	0.0197459952233753
4	KWMTBOMO00833	KWMTBOMO05629	0.0266487695561659
5	KWMTBOMO00833	KWMTBOMO14076	0.0186607151652174
6	KWMTBOMO00833	KWMTBOMO09810	0.0269410900804541
7	KWMTBOMO00833	KWMTBOMO06209	0.0204011781547914
8	KWMTBOMO00833	KWMTBOMO01708	0.0249324085429612
9	KWMTBOMO00833	KWMTBOMO01751	0.0185682741821399
10	KWMTBOMO00833	KWMTBOMO03122	0.0256433641805379
11	KWMTBOMO00833	KWMTBOMO08448	0.0363062997954905
12	KWMTBOMO00833	KWMTBOMO04029	0.0321860912114732
13	KWMTBOMO00833	KWMTBOMO08400	0.0256361739805564
14	KWMTBOMO00833	KWMTBOMO10131	0.0281950621968217
15	KWMTBOMO00833	KWMTBOMO14476	0.0304240133031742
16	KWMTBOMO00833	KWMTBOMO12559	0.0250863048093629
17	KWMTBOMO00833	KWMTBOMO03302	0.0195637108407288
18	KWMTBOMO00833	KWMTBOMO06542	0.027498793030538
19	KWMTBOMO00833	KWMTBOMO05252	0.0298486540907724
20	KWMTBOMO00833	KWMTBOMO10284	0.0261021223226966
21	KWMTBOMO00833	KWMTBOMO00640	0.0288144107683015
22	KWMTBOMO00833	KWMTBOMO14036	0.0248495495958977
23	KWMTBOMO00833	KWMTBOMO07114	0.0278681899816949
24	KWMTBOMO00833	KWMTBOMO00982	0.0226420247481472
25	KWMTBOMO00833	KWMTBOMO11805	0.0324726741771422
26	KWMTBOMO00833	KWMTBOMO01637	0.0273181958485755
27	KWMTBOMO00833	KWMTBOMO01341	0.0232544924815666
28	KWMTBOMO00833	KWMTBOMO08584	0.0226365283099383
29	KWMTBOMO00833	KWMTBOMO01785	0.027019535019142
30	KWMTBOMO00833	KWMTBOMO09556	0.0362440308884825
31	KWMTBOMO00833	KWMTBOMO12617	0.0363701674785205
32	KWMTBOMO00833	KWMTBOMO07948	0.0268527935431892
33	KWMTBOMO00833	KWMTBOMO04480	0.0254699362480095
34	KWMTBOMO00833	KWMTBOMO08196	0.024355164879719
35	KWMTBOMO00833	KWMTBOMO14462	0.0323659386394918
36	KWMTBOMO00833	KWMTBOMO00591	0.0222735468421377
37	KWMTBOMO00833	KWMTBOMO00501	0.040663399364419
38	KWMTBOMO00833	KWMTBOMO01241	0.0270415212727247
39	KWMTBOMO00833	KWMTBOMO08918	0.0264402832473596
40	KWMTBOMO00833	KWMTBOMO11113	0.0278107870130771
41	KWMTBOMO00833	KWMTBOMO04554	0.0372241619273651
42	KWMTBOMO00833	KWMTBOMO03449	0.029523912341308
43	KWMTBOMO00833	KWMTBOMO02152	0.0245152398826739
44	KWMTBOMO00833	KWMTBOMO12970	0.0292452479553576
45	KWMTBOMO00833	KWMTBOMO01563	0.0271555910209162
46	KWMTBOMO00833	KWMTBOMO04040	0.0294041175374887
47	KWMTBOMO00833	KWMTBOMO09683	0.0210847760671929
48	KWMTBOMO00833	KWMTBOMO07919	0.0256097129255732
49	KWMTBOMO00833	KWMTBOMO02211	0.0264353124812766
50	KWMTBOMO00833	KWMTBOMO15992	0.034077664061974
51	KWMTBOMO00833	KWMTBOMO05111	0.0245542492367419
52	KWMTBOMO00833	KWMTBOMO04667	0.02254919067129
53	KWMTBOMO00833	KWMTBOMO05741	0.0230867393827084
54	KWMTBOMO00833	KWMTBOMO07516	0.0310534789637974
55	KWMTBOMO00833	KWMTBOMO05631	0.025836422787694
56	KWMTBOMO00833	KWMTBOMO01718	0.0275005728727736
57	KWMTBOMO00833	KWMTBOMO06166	0.0255618672745348
58	KWMTBOMO00833	KWMTBOMO02165	0.016501946275104
59	KWMTBOMO00833	KWMTBOMO08667	0.0311807690370874
60	KWMTBOMO00833	KWMTBOMO11442	0.0407531820476325
61	KWMTBOMO00833	KWMTBOMO10243	0.0298291938133189
62	KWMTBOMO00833	KWMTBOMO02993	0.0226599157419102
63	KWMTBOMO00833	KWMTBOMO11649	0.0297548363848925
64	KWMTBOMO00833	KWMTBOMO13228	0.0222656744677265
65	KWMTBOMO00833	KWMTBOMO05194	0.0309809790000722
66	KWMTBOMO00833	KWMTBOMO09124	0.0309122105103713
67	KWMTBOMO00833	KWMTBOMO14191	0.030074094998213
68	KWMTBOMO00833	KWMTBOMO08695	0.0298135725189011
69	KWMTBOMO00833	KWMTBOMO11867	0.0486932356060339
70	KWMTBOMO00833	KWMTBOMO03279	0.0266594895049888
71	KWMTBOMO00833	KWMTBOMO08330	0.0307100612983137
72	KWMTBOMO00833	KWMTBOMO05739	0.0191701549628413
73	KWMTBOMO00833	KWMTBOMO00167	0.0222542934074833
74	KWMTBOMO00833	KWMTBOMO06330	0.0290675198469962
75	KWMTBOMO00833	KWMTBOMO06248	0.032026969539496
76	KWMTBOMO00833	KWMTBOMO14055	0.0235152284667752
77	KWMTBOMO00833	KWMTBOMO08906	0.0355992620810335
78	KWMTBOMO00833	KWMTBOMO14164	0.0329426050605736
79	KWMTBOMO00833	KWMTBOMO16131	0.0256790345857335
80	KWMTBOMO00833	KWMTBOMO14282	0.0186814377144558
81	KWMTBOMO00833	KWMTBOMO03433	0.0323261467030613
82	KWMTBOMO00833	KWMTBOMO01287	0.0327367300240709
83	KWMTBOMO00833	KWMTBOMO08302	0.0275035961009401
84	KWMTBOMO00833	KWMTBOMO08145	0.0237376316698589
85	KWMTBOMO00833	KWMTBOMO10488	0.0254783131172128
86	KWMTBOMO00833	KWMTBOMO03836	0.029296216091934
87	KWMTBOMO00833	KWMTBOMO00535	0.0177109408279226
88	KWMTBOMO00833	KWMTBOMO01851	0.0259632664872455
89	KWMTBOMO00833	KWMTBOMO00989	0.0349639710691981
90	KWMTBOMO00833	KWMTBOMO00883	0.0392085693629156
91	KWMTBOMO00833	KWMTBOMO11872	0.034985989213226
92	KWMTBOMO00833	KWMTBOMO15485	0.0252261784124555
93	KWMTBOMO00833	KWMTBOMO07373	0.0327119087450556
94	KWMTBOMO00833	KWMTBOMO15980	0.0433980250278441
95	KWMTBOMO00833	KWMTBOMO11806	0.0249057042316965
96	KWMTBOMO00833	KWMTBOMO06531	0.029345911446175
97	KWMTBOMO00833	KWMTBOMO15336	0.0207162414959333
98	KWMTBOMO00833	KWMTBOMO07119	0.030308682068343
99	KWMTBOMO00833	KWMTBOMO05956	0.0249968861519334
100	KWMTBOMO00833	KWMTBOMO08339	0.0209768681510209
101	KWMTBOMO00833	KWMTBOMO15240	0.0395890854829989
102	KWMTBOMO00833	KWMTBOMO10453	0.0195907760534113
103	KWMTBOMO00833	KWMTBOMO13965	0.0255074382539711
104	KWMTBOMO00833	KWMTBOMO08868	0.0228037328986991
105	KWMTBOMO00833	KWMTBOMO08402	0.0312179465515858
106	KWMTBOMO00833	KWMTBOMO04788	0.0359236246777533
107	KWMTBOMO00833	KWMTBOMO04924	0.0280044898317729
108	KWMTBOMO00833	KWMTBOMO01518	0.0186819044513338
109	KWMTBOMO00833	KWMTBOMO09747	0.0246131323290038
110	KWMTBOMO00833	KWMTBOMO12725	0.0236875507379558
111	KWMTBOMO00833	KWMTBOMO09282	0.0293888375797353
112	KWMTBOMO00833	KWMTBOMO09528	0.0285396057221756
113	KWMTBOMO00833	KWMTBOMO05725	0.0266151144260597
114	KWMTBOMO00833	KWMTBOMO11870	0.0469006822409674
115	KWMTBOMO00833	KWMTBOMO14854	0.0289551071050793
116	KWMTBOMO00833	KWMTBOMO01709	0.0251386735263445
117	KWMTBOMO00833	KWMTBOMO05175	0.024000085922804
118	KWMTBOMO00833	KWMTBOMO12106	0.0245581310932282
119	KWMTBOMO00833	KWMTBOMO02904	0.0199059275394508
120	KWMTBOMO00833	KWMTBOMO07220	0.0289064690326301
121	KWMTBOMO00833	KWMTBOMO12187	0.0292209084750237
122	KWMTBOMO00833	KWMTBOMO05421	0.0340995775408159
123	KWMTBOMO00833	KWMTBOMO11015	0.0359174752142644
124	KWMTBOMO00833	KWMTBOMO09492	0.0274300044872213
125	KWMTBOMO00833	KWMTBOMO02843	0.0167354385750862
126	KWMTBOMO00833	KWMTBOMO01003	0.0434096552773176
127	KWMTBOMO00833	KWMTBOMO07128	0.0225735710738971
128	KWMTBOMO00833	KWMTBOMO13315	0.0210571965730599
129	KWMTBOMO00833	KWMTBOMO05744	0.0252710248610064
130	KWMTBOMO00833	KWMTBOMO06110	0.0227592297829317
131	KWMTBOMO00833	KWMTBOMO07201	0.0240789853374438
132	KWMTBOMO00833	KWMTBOMO05428	0.0224152354698023
133	KWMTBOMO00833	KWMTBOMO11188	0.0359863442550992
134	KWMTBOMO00833	KWMTBOMO00525	0.0229501476800864
135	KWMTBOMO00833	KWMTBOMO03177	0.0269489506178187
136	KWMTBOMO00833	KWMTBOMO06100	0.0257211644178101
137	KWMTBOMO00833	KWMTBOMO12920	0.0274508730982805
138	KWMTBOMO00833	KWMTBOMO01707	0.0271153623958926
139	KWMTBOMO00833	KWMTBOMO10194	0.019611041590768
140	KWMTBOMO00833	KWMTBOMO10176	0.0210179937363663
141	KWMTBOMO00833	KWMTBOMO04937	0.0266599311419228
142	KWMTBOMO00833	KWMTBOMO12165	0.034382917618118
143	KWMTBOMO00833	KWMTBOMO09287	0.0234751470085458
144	KWMTBOMO00833	KWMTBOMO04632	0.0214923786261362
145	KWMTBOMO00833	KWMTBOMO00621	0.0260255263442427
146	KWMTBOMO00833	KWMTBOMO03450	0.0305404222914591
147	KWMTBOMO00833	KWMTBOMO15877	0.0288328150801919
148	KWMTBOMO00833	KWMTBOMO05364	0.0235116543470767
149	KWMTBOMO00833	KWMTBOMO11808	0.0215667856226695
150	KWMTBOMO00833	KWMTBOMO10545	0.0247823699775375
151	KWMTBOMO00833	KWMTBOMO12107	0.0210347195811168
152	KWMTBOMO00833	KWMTBOMO00392	0.0231893296336652
153	KWMTBOMO00833	KWMTBOMO10322	0.0229139058141175
154	KWMTBOMO00833	KWMTBOMO05924	0.0292404705447939
155	KWMTBOMO00833	KWMTBOMO05674	0.0224654217787271
156	KWMTBOMO00833	KWMTBOMO14960	0.0285983734535749
157	KWMTBOMO00833	KWMTBOMO10518	0.0210801293690783
158	KWMTBOMO00833	KWMTBOMO14465	0.0277037331414827
159	KWMTBOMO00833	KWMTBOMO00157	0.0209064743074755
160	KWMTBOMO00833	KWMTBOMO02846	0.0170929648835121
161	KWMTBOMO00833	KWMTBOMO15098	0.0349501777235197
162	KWMTBOMO00833	KWMTBOMO11693	0.0400381898322927
163	KWMTBOMO00833	KWMTBOMO09962	0.0316720351339276
164	KWMTBOMO00833	KWMTBOMO09535	0.0288377961029784
165	KWMTBOMO00833	KWMTBOMO07107	0.0247408433082748
166	KWMTBOMO00833	KWMTBOMO12434	0.0231003799127124
167	KWMTBOMO00833	KWMTBOMO00539	0.0206998334066822
168	KWMTBOMO00833	KWMTBOMO06532	0.0301079893121596
169	KWMTBOMO00833	KWMTBOMO09357	0.0265173625449646
170	KWMTBOMO00833	KWMTBOMO02625	0.0328096651713771
171	KWMTBOMO00833	KWMTBOMO14742	0.0268513645651308
172	KWMTBOMO00833	KWMTBOMO15761	0.0259024418358398
173	KWMTBOMO00833	KWMTBOMO14269	0.035560433647042
174	KWMTBOMO00833	KWMTBOMO11605	0.0292007121792141
175	KWMTBOMO00833	KWMTBOMO05427	0.0271755948517633
176	KWMTBOMO00833	KWMTBOMO06217	0.0241261009980389
177	KWMTBOMO00833	KWMTBOMO15648	0.0254606577822697
178	KWMTBOMO00833	KWMTBOMO14878	0.0339317619167043
179	KWMTBOMO00833	KWMTBOMO12629	0.0251419088989323
180	KWMTBOMO00833	KWMTBOMO12192	0.0241921033551457
181	KWMTBOMO00833	KWMTBOMO09119	0.024290981836117
182	KWMTBOMO00833	KWMTBOMO00211	0.0272461220695664
183	KWMTBOMO00833	KWMTBOMO06458	0.0329154971956179
184	KWMTBOMO00833	KWMTBOMO15710	0.0257561479849204
185	KWMTBOMO00833	KWMTBOMO02276	0.0238573030840863
186	KWMTBOMO00833	KWMTBOMO10133	0.0342474407407492
187	KWMTBOMO00833	KWMTBOMO02991	0.0241093636810009
188	KWMTBOMO00833	KWMTBOMO10397	0.0257797873186781
189	KWMTBOMO00833	KWMTBOMO05503	0.0344057485549065
190	KWMTBOMO00833	KWMTBOMO01662	0.0262174381404317
191	KWMTBOMO00833	KWMTBOMO07642	0.0312772064122604
192	KWMTBOMO00833	KWMTBOMO13780	0.0342237900475175
193	KWMTBOMO00833	KWMTBOMO11972	0.0259308442339378
194	KWMTBOMO00833	KWMTBOMO13368	0.0226378295336038
195	KWMTBOMO00833	KWMTBOMO13318	0.0271130226204813
196	KWMTBOMO00833	KWMTBOMO04778	0.0376021407757521
197	KWMTBOMO00833	KWMTBOMO06460	0.0322680215153445
198	KWMTBOMO00833	KWMTBOMO14042	0.0440387521863263
199	KWMTBOMO00833	KWMTBOMO11868	0.0473018958863283
200	KWMTBOMO00833	KWMTBOMO03862	0.0287743834264286
201	KWMTBOMO00833	KWMTBOMO10958	0.0261013099126515
202	KWMTBOMO00833	KWMTBOMO06501	0.0272210538955932
203	KWMTBOMO00833	KWMTBOMO01862	0.0234875701197244
204	KWMTBOMO00833	KWMTBOMO07374	0.0260500154072068
205	KWMTBOMO00833	KWMTBOMO04815	0.0201212435538376
206	KWMTBOMO00833	KWMTBOMO11084	0.0278901621690397
207	KWMTBOMO00833	KWMTBOMO08367	0.0393539538790829
208	KWMTBOMO00833	KWMTBOMO14418	0.0270919658613968
209	KWMTBOMO00833	KWMTBOMO12566	0.0250930779995084
210	KWMTBOMO00833	KWMTBOMO16135	0.0312701856348639
211	KWMTBOMO00833	KWMTBOMO08828	0.023209993821881
212	KWMTBOMO00833	KWMTBOMO15979	0.0257432823168582
213	KWMTBOMO00833	KWMTBOMO03346	0.028607497651626
214	KWMTBOMO00833	KWMTBOMO09043	0.0227391983775914
215	KWMTBOMO00833	KWMTBOMO14431	0.0259105856188518
216	KWMTBOMO00833	KWMTBOMO06159	0.0279914811069034
217	KWMTBOMO00833	KWMTBOMO02645	0.0322659342998114
218	KWMTBOMO00833	KWMTBOMO03385	0.022051334056302
219	KWMTBOMO00833	KWMTBOMO00209	0.0313791630226267
220	KWMTBOMO00833	KWMTBOMO07562	0.0220246437203162
221	KWMTBOMO00833	KWMTBOMO15679	0.0391158399654534
222	KWMTBOMO00833	KWMTBOMO16000	0.0236840369297107
223	KWMTBOMO00833	KWMTBOMO04567	0.0318603334247913
224	KWMTBOMO00833	KWMTBOMO00712	0.0359384709601315
225	KWMTBOMO00833	KWMTBOMO01821	0.0212226564641147
226	KWMTBOMO00833	KWMTBOMO09918	0.0300509286710549
227	KWMTBOMO00833	KWMTBOMO15946	0.0210622837147189
228	KWMTBOMO00833	KWMTBOMO14625	0.0260444457906021
229	KWMTBOMO00833	KWMTBOMO03306	0.024398886376496
230	KWMTBOMO00833	KWMTBOMO08364	0.0160334341423158
231	KWMTBOMO00833	KWMTBOMO14272	0.0341756593661727
232	KWMTBOMO00833	KWMTBOMO08144	0.021388633934225
233	KWMTBOMO00833	KWMTBOMO08441	0.0238692186581122
234	KWMTBOMO00833	KWMTBOMO08559	0.0434310322734162
235	KWMTBOMO00833	KWMTBOMO00425	0.0272375836851455
236	KWMTBOMO00833	KWMTBOMO05162	0.0283905479533152
237	KWMTBOMO00833	KWMTBOMO14658	0.0261977876407487
238	KWMTBOMO00833	KWMTBOMO08542	0.0249860632931172
239	KWMTBOMO00833	KWMTBOMO11763	0.0265287939615546
240	KWMTBOMO00833	KWMTBOMO08670	0.0290950167474372
241	KWMTBOMO00833	KWMTBOMO13235	0.0220838117314293
242	KWMTBOMO00833	KWMTBOMO05242	0.030503257854506
243	KWMTBOMO00833	KWMTBOMO05357	0.0258578802374052
244	KWMTBOMO00833	KWMTBOMO08843	0.0233206708905832
245	KWMTBOMO00833	KWMTBOMO03798	0.0268383405982544
246	KWMTBOMO00833	KWMTBOMO05372	0.018982257712849
247	KWMTBOMO00833	KWMTBOMO12907	0.0198926406781178
248	KWMTBOMO00833	KWMTBOMO16301	0.0277548970820301
249	KWMTBOMO00833	KWMTBOMO03861	0.0174160672052264
250	KWMTBOMO00833	KWMTBOMO06040	0.0262091423948475
251	KWMTBOMO00833	KWMTBOMO13787	0.0231731937978096
252	KWMTBOMO00833	KWMTBOMO12523	0.0300404242445094
253	KWMTBOMO00833	KWMTBOMO14454	0.0243429086103098
254	KWMTBOMO00833	KWMTBOMO14773	0.029663191292581
255	KWMTBOMO00833	KWMTBOMO12195	0.0290380024649081
256	KWMTBOMO00833	KWMTBOMO11648	0.0285831976141848
257	KWMTBOMO00833	KWMTBOMO08740	0.0269263486618394
258	KWMTBOMO00833	KWMTBOMO14363	0.0248752143845557
259	KWMTBOMO00833	KWMTBOMO05056	0.0206995243458764
260	KWMTBOMO00833	KWMTBOMO07652	0.0257460909594815
261	KWMTBOMO00833	KWMTBOMO15947	0.0377534834250433
262	KWMTBOMO00833	KWMTBOMO00988	0.0379636289125445
263	KWMTBOMO00833	KWMTBOMO06316	0.0315791167305187
264	KWMTBOMO00833	KWMTBOMO12486	0.0451269255796879
265	KWMTBOMO00833	KWMTBOMO04325	0.0234998484491964
266	KWMTBOMO00833	KWMTBOMO13832	0.025045443981936
267	KWMTBOMO00833	KWMTBOMO09551	0.0200951751847461
268	KWMTBOMO00833	KWMTBOMO14077	0.0350283749451381
269	KWMTBOMO00833	KWMTBOMO16176	0.0303121853180532
270	KWMTBOMO00833	KWMTBOMO12305	0.0236671810142817
271	KWMTBOMO00833	KWMTBOMO08981	0.0216404583896121
272	KWMTBOMO00833	KWMTBOMO16437	0.0315026478836732
273	KWMTBOMO00833	KWMTBOMO09811	0.018390902032025
274	KWMTBOMO00833	KWMTBOMO15709	0.028166675830999
275	KWMTBOMO00833	KWMTBOMO05132	0.0288527545690973
276	KWMTBOMO00833	KWMTBOMO07312	0.0290723758186527
277	KWMTBOMO01078	KWMTBOMO03861	0.0211011550751254
278	KWMTBOMO01078	KWMTBOMO10194	0.0292856242195705
279	KWMTBOMO01078	KWMTBOMO06040	0.0202575583669662
280	KWMTBOMO01078	KWMTBOMO08339	0.0192109342644756
281	KWMTBOMO01078	KWMTBOMO14773	0.0238228138294403
282	KWMTBOMO01078	KWMTBOMO07312	0.0241544929186582
283	KWMTBOMO01078	KWMTBOMO13787	0.0202480252308359
284	KWMTBOMO01078	KWMTBOMO09492	0.024195374017327
285	KWMTBOMO01078	KWMTBOMO11605	0.0173733280826677
286	KWMTBOMO01078	KWMTBOMO04567	0.01564509270022
287	KWMTBOMO01078	KWMTBOMO09810	0.0277722361588594
288	KWMTBOMO01078	KWMTBOMO01662	0.0218961793485053
289	KWMTBOMO01078	KWMTBOMO13235	0.0262384659022647
290	KWMTBOMO01078	KWMTBOMO05175	0.0220608762209995
291	KWMTBOMO01078	KWMTBOMO04788	0.0113210774749163
292	KWMTBOMO01078	KWMTBOMO09282	0.0257738210871205
293	KWMTBOMO01078	KWMTBOMO12523	0.022624983260879
294	KWMTBOMO01078	KWMTBOMO09535	0.012055265118228
295	KWMTBOMO01078	KWMTBOMO14960	0.0210133403722871
296	KWMTBOMO01078	KWMTBOMO00539	0.0171674538324005
297	KWMTBOMO01078	KWMTBOMO03306	0.0176337212707153
298	KWMTBOMO01078	KWMTBOMO08144	0.0155558121976701
299	KWMTBOMO01078	KWMTBOMO14625	0.0257835623429434
300	KWMTBOMO01078	KWMTBOMO07948	0.0243970771581858
301	KWMTBOMO01078	KWMTBOMO03798	0.013002324541477
302	KWMTBOMO01078	KWMTBOMO15648	0.0174423383788295
303	KWMTBOMO01078	KWMTBOMO10518	0.0209543972990375
304	KWMTBOMO01078	KWMTBOMO05725	0.0195796300637002
305	KWMTBOMO01078	KWMTBOMO14282	0.0160477322225201
306	KWMTBOMO01078	KWMTBOMO14042	0.0190819323945149
307	KWMTBOMO01078	KWMTBOMO12305	0.0309281517352959
308	KWMTBOMO01078	KWMTBOMO15980	0.0250013375585068
309	KWMTBOMO01078	KWMTBOMO11763	0.0135492047207022
310	KWMTBOMO01078	KWMTBOMO15946	0.0220375074872436
311	KWMTBOMO01078	KWMTBOMO08302	0.013709343224127
312	KWMTBOMO01078	KWMTBOMO07107	0.0134775282577213
313	KWMTBOMO01078	KWMTBOMO00712	0.0156159696513086
314	KWMTBOMO01078	KWMTBOMO04632	0.0138877706700562
315	KWMTBOMO01078	KWMTBOMO05503	0.0204400955128578
316	KWMTBOMO01078	KWMTBOMO05428	0.024853972038163
317	KWMTBOMO01078	KWMTBOMO10284	0.0220775636504069
318	KWMTBOMO01078	KWMTBOMO04815	0.0162648675177835
319	KWMTBOMO01078	KWMTBOMO05741	0.0249775979217144
320	KWMTBOMO01078	KWMTBOMO13832	0.0208131418229523
321	KWMTBOMO01078	KWMTBOMO07652	0.0283832197910442
322	KWMTBOMO01078	KWMTBOMO09357	0.0155941767910567
323	KWMTBOMO01078	KWMTBOMO06532	0.0102725320072017
324	KWMTBOMO01078	KWMTBOMO12486	0.0128876459211487
325	KWMTBOMO01078	KWMTBOMO01709	0.0227287766873082
326	KWMTBOMO01078	KWMTBOMO08559	0.011705624014558
327	KWMTBOMO01078	KWMTBOMO15979	0.0324721757212677
328	KWMTBOMO01078	KWMTBOMO03449	0.0243104803888855
329	KWMTBOMO01078	KWMTBOMO01341	0.0157728430469513
330	KWMTBOMO01078	KWMTBOMO00209	0.0108751403964443
331	KWMTBOMO01078	KWMTBOMO02991	0.0116929131988562
332	KWMTBOMO01078	KWMTBOMO12107	0.0229554209935911
333	KWMTBOMO01078	KWMTBOMO04667	0.0157188958251198
334	KWMTBOMO01078	KWMTBOMO12617	0.0185480360436759
335	KWMTBOMO01078	KWMTBOMO15485	0.0210374785231498
336	KWMTBOMO01078	KWMTBOMO09528	0.0197977151434221
337	KWMTBOMO01078	KWMTBOMO06460	0.0195255007798931
338	KWMTBOMO01078	KWMTBOMO06110	0.0103201343868592
339	KWMTBOMO01078	KWMTBOMO00425	0.021009509160375
340	KWMTBOMO01078	KWMTBOMO07201	0.0270927189720218
341	KWMTBOMO01078	KWMTBOMO00157	0.0183869919553974
342	KWMTBOMO01078	KWMTBOMO02843	0.0249466334006129
343	KWMTBOMO01078	KWMTBOMO03433	0.0224150420305648
344	KWMTBOMO01078	KWMTBOMO16176	0.0243868053834934
345	KWMTBOMO01078	KWMTBOMO00640	0.02255111190011
346	KWMTBOMO01078	KWMTBOMO08918	0.021619151058781
347	KWMTBOMO01078	KWMTBOMO03385	0.0188730865196048
348	KWMTBOMO01078	KWMTBOMO02625	0.0208911760064828
349	KWMTBOMO01078	KWMTBOMO07119	0.0191809198168987
350	KWMTBOMO01078	KWMTBOMO08843	0.0142500074228306
351	KWMTBOMO01078	KWMTBOMO01637	0.0201238496903958
352	KWMTBOMO01078	KWMTBOMO04480	0.0247941645957753
353	KWMTBOMO01078	KWMTBOMO11870	0.0137007486034249
354	KWMTBOMO01078	KWMTBOMO09119	0.0117650571806959
355	KWMTBOMO01078	KWMTBOMO08667	0.0211941940446009
356	KWMTBOMO01078	KWMTBOMO00591	0.0282158984659571
357	KWMTBOMO01078	KWMTBOMO12434	0.0185501476480884
358	KWMTBOMO01078	KWMTBOMO14454	0.0173533975421877
359	KWMTBOMO01078	KWMTBOMO00989	0.0239865357383563
360	KWMTBOMO01078	KWMTBOMO13318	0.0234808444725016
361	KWMTBOMO01078	KWMTBOMO14363	0.0176964808854212
362	KWMTBOMO01078	KWMTBOMO09551	0.0145246198313272
363	KWMTBOMO01078	KWMTBOMO15679	0.0205721794819266
364	KWMTBOMO01078	KWMTBOMO11084	0.0209530430253978
365	KWMTBOMO01078	KWMTBOMO08906	0.0159094005440922
366	KWMTBOMO01078	KWMTBOMO15336	0.0268880754266274
367	KWMTBOMO01078	KWMTBOMO05744	0.0191335900909754
368	KWMTBOMO01078	KWMTBOMO11972	0.026516153578604
369	KWMTBOMO01078	KWMTBOMO12479	0.0208316056681574
370	KWMTBOMO01078	KWMTBOMO10545	0.0174268663879504
371	KWMTBOMO01078	KWMTBOMO07114	0.0110775045576372
372	KWMTBOMO01078	KWMTBOMO13368	0.0234968545215502
373	KWMTBOMO01078	KWMTBOMO06458	0.0180133795873921
374	KWMTBOMO01078	KWMTBOMO05111	0.024228256275241
375	KWMTBOMO01078	KWMTBOMO10176	0.0276392367090501
376	KWMTBOMO01078	KWMTBOMO05357	0.0170667782972414
377	KWMTBOMO01078	KWMTBOMO07374	0.0262152691175883
378	KWMTBOMO01078	KWMTBOMO12106	0.0171127340384256
379	KWMTBOMO01078	KWMTBOMO05924	0.0217464034927672
380	KWMTBOMO01078	KWMTBOMO10958	0.0233607455828641
381	KWMTBOMO01078	KWMTBOMO15098	0.0232382523056235
382	KWMTBOMO01078	KWMTBOMO03836	0.0225013275302246
383	KWMTBOMO01078	KWMTBOMO01563	0.0262450623877284
384	KWMTBOMO01078	KWMTBOMO11868	0.0189623877878959
385	KWMTBOMO01078	KWMTBOMO16131	0.024471510193128
386	KWMTBOMO01078	KWMTBOMO05194	0.022371349880258
387	KWMTBOMO01078	KWMTBOMO06217	0.0203662893148159
388	KWMTBOMO01078	KWMTBOMO11693	0.0154969394330352
389	KWMTBOMO01078	KWMTBOMO09962	0.0131138705246531
390	KWMTBOMO01078	KWMTBOMO05674	0.0166181695084194
391	KWMTBOMO01078	KWMTBOMO00211	0.0240082494820023
392	KWMTBOMO01078	KWMTBOMO14854	0.0186414561777025
393	KWMTBOMO01078	KWMTBOMO00525	0.0196648715297648
394	KWMTBOMO01078	KWMTBOMO15240	0.0154668785302566
395	KWMTBOMO01078	KWMTBOMO08740	0.0209138376986935
396	KWMTBOMO01078	KWMTBOMO10453	0.0201317646300047
397	KWMTBOMO01078	KWMTBOMO05056	0.0265378346617192
398	KWMTBOMO01078	KWMTBOMO11806	0.0175544289334163
399	KWMTBOMO01078	KWMTBOMO12187	0.0159510712443714
400	KWMTBOMO01078	KWMTBOMO14055	0.015074565149712
401	KWMTBOMO01078	KWMTBOMO05252	0.0237303491736779
402	KWMTBOMO01078	KWMTBOMO01707	0.021336350686333
403	KWMTBOMO01078	KWMTBOMO02645	0.0187724678366992
404	KWMTBOMO01078	KWMTBOMO08584	0.0187561825240385
405	KWMTBOMO01078	KWMTBOMO06248	0.0223939094948999
406	KWMTBOMO01078	KWMTBOMO03450	0.0207471388289496
407	KWMTBOMO01078	KWMTBOMO05526	0.0240548292980025
408	KWMTBOMO01078	KWMTBOMO15761	0.0212654332549035
409	KWMTBOMO01078	KWMTBOMO15709	0.031117127317041
410	KWMTBOMO01078	KWMTBOMO10397	0.010481795406085
411	KWMTBOMO01078	KWMTBOMO11015	0.0219523002811021
412	KWMTBOMO01078	KWMTBOMO09747	0.0224227093325042
413	KWMTBOMO01078	KWMTBOMO03122	0.0231163411581736
414	KWMTBOMO01078	KWMTBOMO08402	0.0212324496300078
415	KWMTBOMO01078	KWMTBOMO05629	0.0226111997530125
416	KWMTBOMO01078	KWMTBOMO04554	0.0262374465110676
417	KWMTBOMO01078	KWMTBOMO11805	0.0164673375426575
418	KWMTBOMO01078	KWMTBOMO02165	0.0317314734123597
419	KWMTBOMO01078	KWMTBOMO00392	0.0160292214256842
420	KWMTBOMO01078	KWMTBOMO00535	0.0311369298413368
421	KWMTBOMO01078	KWMTBOMO01708	0.0272941552227265
422	KWMTBOMO01078	KWMTBOMO07516	0.0134490626275979
423	KWMTBOMO01078	KWMTBOMO11872	0.0212405964264989
424	KWMTBOMO01078	KWMTBOMO01821	0.0221150535648904
425	KWMTBOMO01078	KWMTBOMO11442	0.0174314103990901
426	KWMTBOMO01078	KWMTBOMO12192	0.0270292889067031
427	KWMTBOMO01078	KWMTBOMO11188	0.0155756337778151
428	KWMTBOMO01078	KWMTBOMO12559	0.0164476590924684
429	KWMTBOMO01078	KWMTBOMO00883	0.0147702498955917
430	KWMTBOMO01078	KWMTBOMO16301	0.00986822952960004
431	KWMTBOMO01078	KWMTBOMO07642	0.0228941181592302
432	KWMTBOMO01078	KWMTBOMO14465	0.0236803347220007
433	KWMTBOMO01078	KWMTBOMO06209	0.0211408346390891
434	KWMTBOMO01078	KWMTBOMO14077	0.0170290149565151
435	KWMTBOMO01078	KWMTBOMO09043	0.0150744562292722
436	KWMTBOMO01078	KWMTBOMO10322	0.026093127261693
437	KWMTBOMO01078	KWMTBOMO14431	0.0252129148937353
438	KWMTBOMO01078	KWMTBOMO06316	0.0217867545553307
439	KWMTBOMO01078	KWMTBOMO16000	0.0138043458165057
440	KWMTBOMO01078	KWMTBOMO02152	0.0148398335507083
441	KWMTBOMO01078	KWMTBOMO15947	0.0227968965919138
442	KWMTBOMO01078	KWMTBOMO14076	0.0275242097235717
443	KWMTBOMO01078	KWMTBOMO07562	0.0214510142425924
444	KWMTBOMO01078	KWMTBOMO13315	0.0240886363751513
445	KWMTBOMO01078	KWMTBOMO08448	0.0147127380430602
446	KWMTBOMO01078	KWMTBOMO07373	0.0220412245089822
447	KWMTBOMO01078	KWMTBOMO05631	0.0262491501343895
448	KWMTBOMO01078	KWMTBOMO14036	0.0161370857358683
449	KWMTBOMO01078	KWMTBOMO04937	0.0248882353929231
450	KWMTBOMO01078	KWMTBOMO09287	0.0274506164903591
451	KWMTBOMO01078	KWMTBOMO06531	0.0160880051700409
452	KWMTBOMO01078	KWMTBOMO05242	0.0171530306589522
453	KWMTBOMO01078	KWMTBOMO10131	0.0148842217729549
454	KWMTBOMO01078	KWMTBOMO14878	0.022222831835313
455	KWMTBOMO01078	KWMTBOMO09683	0.0224158082916034
456	KWMTBOMO01078	KWMTBOMO16135	0.0109759792939478
457	KWMTBOMO01078	KWMTBOMO05132	0.0162262728402175
458	KWMTBOMO01078	KWMTBOMO14191	0.0214638130843443
459	KWMTBOMO01078	KWMTBOMO16437	0.0230166060145004
460	KWMTBOMO01078	KWMTBOMO04325	0.0184925111239444
461	KWMTBOMO01078	KWMTBOMO03346	0.0213960816798581
462	KWMTBOMO01078	KWMTBOMO08145	0.0269797026467249
463	KWMTBOMO01078	KWMTBOMO08868	0.0179628696638881
464	KWMTBOMO01078	KWMTBOMO01718	0.0210756060490898
465	KWMTBOMO01078	KWMTBOMO03302	0.0158044254555888
466	KWMTBOMO01078	KWMTBOMO08400	0.0221491934941656
467	KWMTBOMO01078	KWMTBOMO00982	0.031408941166833
468	KWMTBOMO01078	KWMTBOMO09408	0.0156657822752814
469	KWMTBOMO01078	KWMTBOMO10488	0.0221656818740478
470	KWMTBOMO01078	KWMTBOMO01287	0.017047046667279
471	KWMTBOMO01078	KWMTBOMO11649	0.0180326307615874
472	KWMTBOMO01078	KWMTBOMO08364	0.0244920180481925
473	KWMTBOMO01078	KWMTBOMO05372	0.0341850006863817
474	KWMTBOMO01078	KWMTBOMO07919	0.0106678353500953
475	KWMTBOMO01078	KWMTBOMO08670	0.0282228091908315
476	KWMTBOMO01078	KWMTBOMO11648	0.0247561462397287
477	KWMTBOMO01078	KWMTBOMO14164	0.0216132801682288
478	KWMTBOMO01078	KWMTBOMO00501	0.0159997838436819
479	KWMTBOMO01078	KWMTBOMO06166	0.0123868035885296
480	KWMTBOMO01078	KWMTBOMO09811	0.0340497938497755
481	KWMTBOMO01078	KWMTBOMO04778	0.0203864761523238
482	KWMTBOMO01078	KWMTBOMO08367	0.0197737636902367
483	KWMTBOMO01078	KWMTBOMO14658	0.0241760597108415
484	KWMTBOMO01078	KWMTBOMO01241	0.0203913436725111
485	KWMTBOMO01078	KWMTBOMO05427	0.0180371010414827
486	KWMTBOMO01078	KWMTBOMO12970	0.021131561099133
487	KWMTBOMO01078	KWMTBOMO03177	0.0230047104016007
488	KWMTBOMO01078	KWMTBOMO00988	0.0203488476822542
489	KWMTBOMO01078	KWMTBOMO08695	0.0129357481781074
490	KWMTBOMO01078	KWMTBOMO06330	0.0131134433994712
491	KWMTBOMO01078	KWMTBOMO08542	0.0268435798241639
492	KWMTBOMO01078	KWMTBOMO05421	0.0163347334049847
493	KWMTBOMO01078	KWMTBOMO05739	0.01948664127853
494	KWMTBOMO01078	KWMTBOMO07220	0.0239092063618541
495	KWMTBOMO01078	KWMTBOMO04924	0.0262883374783666
496	KWMTBOMO01078	KWMTBOMO14269	0.0147365042502949
497	KWMTBOMO01078	KWMTBOMO03279	0.0205332646116387
498	KWMTBOMO01078	KWMTBOMO01851	0.0175489264631825
499	KWMTBOMO01078	KWMTBOMO13228	0.0145053008575243
500	KWMTBOMO01078	KWMTBOMO06542	0.0218345783512005
501	KWMTBOMO01078	KWMTBOMO13965	0.0176801415855096
502	KWMTBOMO01078	KWMTBOMO09918	0.0149951657484892
503	KWMTBOMO01078	KWMTBOMO12195	0.0161288270726336
504	KWMTBOMO01078	KWMTBOMO10243	0.0251749556884604
505	KWMTBOMO01078	KWMTBOMO11867	0.0149585074698276
506	KWMTBOMO01078	KWMTBOMO03862	0.0186503852052546
507	KWMTBOMO01078	KWMTBOMO07128	0.0145979957231724
508	KWMTBOMO01078	KWMTBOMO15710	0.0246952409675511
509	KWMTBOMO01078	KWMTBOMO08981	0.0175012338428203
510	KWMTBOMO01078	KWMTBOMO14272	0.0231487293901048
511	KWMTBOMO01078	KWMTBOMO12920	0.0168231204219325
512	KWMTBOMO01078	KWMTBOMO05956	0.0159919652714323
513	KWMTBOMO01078	KWMTBOMO06100	0.0194496809759139
514	KWMTBOMO01078	KWMTBOMO10133	0.0212449760004947
515	KWMTBOMO01078	KWMTBOMO05162	0.0245334770427878
516	KWMTBOMO01078	KWMTBOMO02993	0.0164407428078047
517	KWMTBOMO01078	KWMTBOMO02904	0.0209348320740422
518	KWMTBOMO01078	KWMTBOMO08196	0.0258407348805248
519	KWMTBOMO01078	KWMTBOMO02846	0.01110741597397
520	KWMTBOMO01078	KWMTBOMO09556	0.0151827700213012
521	KWMTBOMO01078	KWMTBOMO11113	0.0199131619705612
522	KWMTBOMO01078	KWMTBOMO12725	0.0206991381732795
523	KWMTBOMO01078	KWMTBOMO04040	0.01739220013782
524	KWMTBOMO01078	KWMTBOMO08330	0.0180679640240344
525	KWMTBOMO01078	KWMTBOMO02276	0.0219032865529175
526	KWMTBOMO01078	KWMTBOMO04029	0.0198272497729671
527	KWMTBOMO01078	KWMTBOMO12566	0.0152346625209294
528	KWMTBOMO01078	KWMTBOMO06159	0.017874581760283
529	KWMTBOMO01078	KWMTBOMO12165	0.018604596056161
530	KWMTBOMO01078	KWMTBOMO14418	0.0211674077422321
531	KWMTBOMO01078	KWMTBOMO12907	0.0275126574911356
532	KWMTBOMO01078	KWMTBOMO05364	0.0180153877034063
533	KWMTBOMO01078	KWMTBOMO06501	0.0161335423460655
534	KWMTBOMO01078	KWMTBOMO15877	0.0193885182132915
535	KWMTBOMO01078	KWMTBOMO00621	0.0186810354402973
536	KWMTBOMO01078	KWMTBOMO13780	0.0185481652626494
537	KWMTBOMO01078	KWMTBOMO01003	0.0229063937510747
538	KWMTBOMO01078	KWMTBOMO00167	0.0282161326604718
539	KWMTBOMO01078	KWMTBOMO14742	0.0197630865144912
540	KWMTBOMO01078	KWMTBOMO01518	0.0333856123427879
541	KWMTBOMO01078	KWMTBOMO01751	0.0215825150306904
542	KWMTBOMO01078	KWMTBOMO01785	0.0155577691489436
543	KWMTBOMO01078	KWMTBOMO12629	0.0236833955878105
544	KWMTBOMO01078	KWMTBOMO01862	0.0201776732854866
545	KWMTBOMO01078	KWMTBOMO02211	0.0237092840478004
546	KWMTBOMO01078	KWMTBOMO08828	0.0105550083217117
547	KWMTBOMO01078	KWMTBOMO08441	0.0171196458060404
548	KWMTBOMO01078	KWMTBOMO15992	0.0206330754017388
549	KWMTBOMO01078	KWMTBOMO09124	0.0192901767243424
550	KWMTBOMO01078	KWMTBOMO14462	0.0154505448793586
551	KWMTBOMO01078	KWMTBOMO14476	0.0203180552611305
552	KWMTBOMO01078	KWMTBOMO11808	0.011170160447397
553	KWMTBOMO01855	KWMTBOMO07201	0.01788047512675
554	KWMTBOMO01855	KWMTBOMO07948	0.0237785637689799
555	KWMTBOMO01855	KWMTBOMO14658	0.0155118173197935
556	KWMTBOMO01855	KWMTBOMO06209	0.0418269067184823
557	KWMTBOMO01855	KWMTBOMO08144	0.0194717545009573
558	KWMTBOMO01855	KWMTBOMO15946	0.0147057072207679
559	KWMTBOMO01855	KWMTBOMO10176	0.0152396097432826
560	KWMTBOMO01855	KWMTBOMO04325	0.0161704095016411
561	KWMTBOMO01855	KWMTBOMO12165	0.0206232794591852
562	KWMTBOMO01855	KWMTBOMO14055	0.0149358429250922
563	KWMTBOMO01855	KWMTBOMO03861	0.0138030916486335
564	KWMTBOMO01855	KWMTBOMO15709	0.0182369711520957
565	KWMTBOMO01855	KWMTBOMO07107	0.0166051088379744
566	KWMTBOMO01855	KWMTBOMO08981	0.0170623729078203
567	KWMTBOMO01855	KWMTBOMO03862	0.0212479718539441
568	KWMTBOMO01855	KWMTBOMO03346	0.0184843435925478
569	KWMTBOMO01855	KWMTBOMO09747	0.0194599629883022
570	KWMTBOMO01855	KWMTBOMO02991	0.0198087858950143
571	KWMTBOMO01855	KWMTBOMO14042	0.0217135077140333
572	KWMTBOMO01855	KWMTBOMO16000	0.0111647098905848
573	KWMTBOMO01855	KWMTBOMO06110	0.0175015431187797
574	KWMTBOMO01855	KWMTBOMO09119	0.0140913778672649
575	KWMTBOMO01855	KWMTBOMO05725	0.0164493248791707
576	KWMTBOMO01855	KWMTBOMO14272	0.0212558941829744
577	KWMTBOMO01855	KWMTBOMO01341	0.00845238764668111
578	KWMTBOMO01855	KWMTBOMO15240	0.0151772481616327
579	KWMTBOMO01855	KWMTBOMO07119	0.0183910824239407
580	KWMTBOMO01855	KWMTBOMO14465	0.0188948430944193
581	KWMTBOMO01855	KWMTBOMO02625	0.0216019675605179
582	KWMTBOMO01855	KWMTBOMO01718	0.0153430639712111
583	KWMTBOMO01855	KWMTBOMO08448	0.0137313459810642
584	KWMTBOMO01855	KWMTBOMO02993	0.019734035473028
585	KWMTBOMO01855	KWMTBOMO15679	0.0199320709787179
586	KWMTBOMO01855	KWMTBOMO11605	0.0251324963583081
587	KWMTBOMO01855	KWMTBOMO00712	0.01147166519855
588	KWMTBOMO01855	KWMTBOMO09962	0.0130238994393251
589	KWMTBOMO01855	KWMTBOMO03306	0.011765096076138
590	KWMTBOMO01855	KWMTBOMO08843	0.0151587311730428
591	KWMTBOMO01855	KWMTBOMO09282	0.02349513481486
592	KWMTBOMO01855	KWMTBOMO00425	0.020931145887864
593	KWMTBOMO01855	KWMTBOMO11805	0.0172316497560342
594	KWMTBOMO01855	KWMTBOMO10518	0.0227134868429135
595	KWMTBOMO01855	KWMTBOMO00982	0.0184159266030284
596	KWMTBOMO01855	KWMTBOMO03433	0.023869066793923
597	KWMTBOMO01855	KWMTBOMO05162	0.0195657385224816
598	KWMTBOMO01855	KWMTBOMO09551	0.0222342953347152
599	KWMTBOMO01855	KWMTBOMO07516	0.0143911320287575
600	KWMTBOMO01855	KWMTBOMO00167	0.0170151380470593
601	KWMTBOMO01855	KWMTBOMO11763	0.0189094294828388
602	KWMTBOMO01855	KWMTBOMO08339	0.0213928356956785
603	KWMTBOMO01855	KWMTBOMO09492	0.0229818221355211
604	KWMTBOMO01855	KWMTBOMO12970	0.0251673330552669
605	KWMTBOMO01855	KWMTBOMO05674	0.0277771623019478
606	KWMTBOMO01855	KWMTBOMO00209	0.0151463281190923
607	KWMTBOMO01855	KWMTBOMO14077	0.0173328414988321
608	KWMTBOMO01855	KWMTBOMO11693	0.0135903802549103
609	KWMTBOMO01855	KWMTBOMO10453	0.0180647250773327
610	KWMTBOMO01855	KWMTBOMO12566	0.0156146265192949
611	KWMTBOMO01855	KWMTBOMO00211	0.0223100313099182
612	KWMTBOMO01855	KWMTBOMO09811	0.0140823395903155
613	KWMTBOMO01855	KWMTBOMO03836	0.0229454796523904
614	KWMTBOMO01855	KWMTBOMO12523	0.0219065088656899
615	KWMTBOMO01855	KWMTBOMO01241	0.0228264505178113
616	KWMTBOMO01855	KWMTBOMO10133	0.0206688735917931
617	KWMTBOMO01855	KWMTBOMO11113	0.0174632935912775
618	KWMTBOMO01855	KWMTBOMO02211	0.0200789192969583
619	KWMTBOMO01855	KWMTBOMO14454	0.015416938663845
620	KWMTBOMO01855	KWMTBOMO04040	0.0158029159447864
621	KWMTBOMO01855	KWMTBOMO16135	0.021557896501255
622	KWMTBOMO01855	KWMTBOMO04924	0.0335210991508807
623	KWMTBOMO01855	KWMTBOMO10545	0.0194572208403188
624	KWMTBOMO01855	KWMTBOMO12486	0.0147045516542706
625	KWMTBOMO01855	KWMTBOMO03450	0.0207903862667621
626	KWMTBOMO01855	KWMTBOMO01563	0.0231594536322027
627	KWMTBOMO01855	KWMTBOMO01708	0.022666439450559
628	KWMTBOMO01855	KWMTBOMO08918	0.0196420128176685
629	KWMTBOMO01855	KWMTBOMO07652	0.0180114196383583
630	KWMTBOMO01855	KWMTBOMO12106	0.0234181293751798
631	KWMTBOMO01855	KWMTBOMO00988	0.020172148070312
632	KWMTBOMO01855	KWMTBOMO08542	0.0191473716575881
633	KWMTBOMO01855	KWMTBOMO01851	0.0235728064455394
634	KWMTBOMO01855	KWMTBOMO03798	0.0196867572830116
635	KWMTBOMO01855	KWMTBOMO07642	0.023375888217704
636	KWMTBOMO01855	KWMTBOMO00591	0.0219995099484517
637	KWMTBOMO01855	KWMTBOMO06501	0.0123003296031147
638	KWMTBOMO01855	KWMTBOMO13315	0.0224480830120118
639	KWMTBOMO01855	KWMTBOMO02843	0.011857003535584
640	KWMTBOMO01855	KWMTBOMO10194	0.0134133203409307
641	KWMTBOMO01855	KWMTBOMO12559	0.0207756423219585
642	KWMTBOMO01855	KWMTBOMO14431	0.0215984712992482
643	KWMTBOMO01855	KWMTBOMO12725	0.0138767609622176
644	KWMTBOMO01855	KWMTBOMO07919	0.0211199515820899
645	KWMTBOMO01855	KWMTBOMO08670	0.0206252765940819
646	KWMTBOMO01855	KWMTBOMO05741	0.0141511009124484
647	KWMTBOMO01855	KWMTBOMO14363	0.0281063329627806
648	KWMTBOMO01855	KWMTBOMO07373	0.0195676793246232
649	KWMTBOMO01855	KWMTBOMO10284	0.0216037740702179
650	KWMTBOMO01855	KWMTBOMO10131	0.0133183760852378
651	KWMTBOMO01855	KWMTBOMO08740	0.0209209231359656
652	KWMTBOMO01855	KWMTBOMO00157	0.0153663440729948
653	KWMTBOMO01855	KWMTBOMO12629	0.0186173575966609
654	KWMTBOMO01855	KWMTBOMO06217	0.0268725115687685
655	KWMTBOMO01855	KWMTBOMO05357	0.0202095820741329
656	KWMTBOMO01855	KWMTBOMO11442	0.0204602784287524
657	KWMTBOMO01855	KWMTBOMO08667	0.0205973591361878
658	KWMTBOMO01855	KWMTBOMO10958	0.0192533230724207
659	KWMTBOMO01855	KWMTBOMO15979	0.0204736285424694
660	KWMTBOMO01855	KWMTBOMO11868	0.0270380135948899
661	KWMTBOMO01855	KWMTBOMO00535	0.0137910055719998
662	KWMTBOMO01855	KWMTBOMO11972	0.0200075045739341
663	KWMTBOMO01855	KWMTBOMO08906	0.0204644880754899
664	KWMTBOMO01855	KWMTBOMO06458	0.0285764881718225
665	KWMTBOMO01855	KWMTBOMO00539	0.0126761797042549
666	KWMTBOMO01855	KWMTBOMO09810	0.0225424039016797
667	KWMTBOMO01855	KWMTBOMO07562	0.0191955437371025
668	KWMTBOMO01855	KWMTBOMO07220	0.0187969286339553
669	KWMTBOMO01855	KWMTBOMO14742	0.015691940294927
670	KWMTBOMO01855	KWMTBOMO14462	0.0217385090138773
671	KWMTBOMO01855	KWMTBOMO08330	0.0210663675413826
672	KWMTBOMO01855	KWMTBOMO00392	0.0161757055432414
673	KWMTBOMO01855	KWMTBOMO16301	0.0139546465757483
674	KWMTBOMO01855	KWMTBOMO15947	0.0232030690372128
675	KWMTBOMO01855	KWMTBOMO12907	0.0157661198983464
676	KWMTBOMO01855	KWMTBOMO09918	0.0130563165131823
677	KWMTBOMO01855	KWMTBOMO05194	0.0167893591945195
678	KWMTBOMO01855	KWMTBOMO03302	0.0132991175687372
679	KWMTBOMO01855	KWMTBOMO02276	0.0210572378224982
680	KWMTBOMO01855	KWMTBOMO14960	0.0201714883724909
681	KWMTBOMO01855	KWMTBOMO08559	0.0117088517998588
682	KWMTBOMO01855	KWMTBOMO07312	0.0192838595193196
683	KWMTBOMO01855	KWMTBOMO04815	0.0168811795564461
684	KWMTBOMO01855	KWMTBOMO09124	0.0203834520678581
685	KWMTBOMO01855	KWMTBOMO05372	0.0175803203021615
686	KWMTBOMO01855	KWMTBOMO13832	0.0166968663337966
687	KWMTBOMO01855	KWMTBOMO05924	0.0238536438459991
688	KWMTBOMO01855	KWMTBOMO04667	0.0231469346151256
689	KWMTBOMO01855	KWMTBOMO05631	0.0194111385621332
690	KWMTBOMO01855	KWMTBOMO01862	0.016902097094057
691	KWMTBOMO01855	KWMTBOMO15761	0.0170408625509432
692	KWMTBOMO01855	KWMTBOMO03385	0.0164550586626651
693	KWMTBOMO01855	KWMTBOMO14476	0.0198199979030714
694	KWMTBOMO01855	KWMTBOMO15485	0.023658962138649
695	KWMTBOMO01855	KWMTBOMO15980	0.0190752066382114
696	KWMTBOMO01855	KWMTBOMO11084	0.0171521545314939
697	KWMTBOMO01855	KWMTBOMO01707	0.022391905156618
698	KWMTBOMO01855	KWMTBOMO14076	0.0196552647797873
699	KWMTBOMO01855	KWMTBOMO15098	0.0207592518415673
700	KWMTBOMO01855	KWMTBOMO13368	0.0119034359642952
701	KWMTBOMO01855	KWMTBOMO14418	0.0203635997712575
702	KWMTBOMO01855	KWMTBOMO00640	0.0219234819691378
703	KWMTBOMO01855	KWMTBOMO14269	0.0172501089699718
704	KWMTBOMO01855	KWMTBOMO15877	0.0218434961761864
705	KWMTBOMO01855	KWMTBOMO06159	0.017085341178028
706	KWMTBOMO01855	KWMTBOMO14191	0.0252989607906275
707	KWMTBOMO01855	KWMTBOMO16176	0.0286893203695191
708	KWMTBOMO01855	KWMTBOMO16437	0.0226020277072744
709	KWMTBOMO01855	KWMTBOMO04029	0.0219616563824311
710	KWMTBOMO01855	KWMTBOMO00525	0.0294496500790882
711	KWMTBOMO01855	KWMTBOMO09535	0.0244261231858211
712	KWMTBOMO01855	KWMTBOMO10322	0.0240256687187421
713	KWMTBOMO01855	KWMTBOMO00989	0.0154051277644181
714	KWMTBOMO01855	KWMTBOMO09408	0.016216145294719
715	KWMTBOMO01855	KWMTBOMO03279	0.0218103739684526
716	KWMTBOMO01855	KWMTBOMO08367	0.0213959822853714
717	KWMTBOMO01855	KWMTBOMO01662	0.0193666550507821
718	KWMTBOMO01855	KWMTBOMO08695	0.0166838304084467
719	KWMTBOMO01855	KWMTBOMO13780	0.0131796472237287
720	KWMTBOMO01855	KWMTBOMO02645	0.0263061916917661
721	KWMTBOMO01855	KWMTBOMO13318	0.0199871035251851
722	KWMTBOMO01855	KWMTBOMO03449	0.0204503528713957
723	KWMTBOMO01855	KWMTBOMO10488	0.0232060027529918
724	KWMTBOMO01855	KWMTBOMO05629	0.0237540240292743
725	KWMTBOMO01855	KWMTBOMO02165	0.0142698765839415
726	KWMTBOMO01855	KWMTBOMO00501	0.0288520500917384
727	KWMTBOMO01855	KWMTBOMO08196	0.0227662888435097
728	KWMTBOMO01855	KWMTBOMO02152	0.0157230929379304
729	KWMTBOMO01855	KWMTBOMO01785	0.0213774060625088
730	KWMTBOMO01855	KWMTBOMO04567	0.0150593253469158
731	KWMTBOMO01855	KWMTBOMO00621	0.023877645984388
732	KWMTBOMO01855	KWMTBOMO11870	0.0147982133073158
733	KWMTBOMO01855	KWMTBOMO07114	0.0147276593710553
734	KWMTBOMO01855	KWMTBOMO11648	0.020510709470999
735	KWMTBOMO01855	KWMTBOMO04554	0.0244007281961712
736	KWMTBOMO01855	KWMTBOMO03177	0.012734189274742
737	KWMTBOMO01855	KWMTBOMO07128	0.0188897839920415
738	KWMTBOMO01855	KWMTBOMO09043	0.0168732745250862
739	KWMTBOMO01855	KWMTBOMO13787	0.0149720142535531
740	KWMTBOMO01855	KWMTBOMO08302	0.0131527121693632
741	KWMTBOMO01855	KWMTBOMO09528	0.0191023014682612
742	KWMTBOMO01855	KWMTBOMO06542	0.029010159808806
743	KWMTBOMO01855	KWMTBOMO05132	0.0196431588389281
744	KWMTBOMO01855	KWMTBOMO05427	0.0191764207760505
745	KWMTBOMO01855	KWMTBOMO01821	0.0272379320145883
746	KWMTBOMO01855	KWMTBOMO14036	0.0181544151824683
747	KWMTBOMO01855	KWMTBOMO12479	0.0177223820115149
748	KWMTBOMO01855	KWMTBOMO12192	0.0167805567111718
749	KWMTBOMO01855	KWMTBOMO06531	0.0194739206030986
750	KWMTBOMO01855	KWMTBOMO00883	0.0124982770409038
751	KWMTBOMO01855	KWMTBOMO06166	0.0191708407726018
752	KWMTBOMO01855	KWMTBOMO06460	0.0229726159879042
753	KWMTBOMO01855	KWMTBOMO01518	0.0185053167414138
754	KWMTBOMO01855	KWMTBOMO15992	0.0250553798622441
755	KWMTBOMO01855	KWMTBOMO12107	0.0224618363650143
756	KWMTBOMO01855	KWMTBOMO05421	0.0158009833246504
757	KWMTBOMO01855	KWMTBOMO12920	0.0168373169410086
758	KWMTBOMO01855	KWMTBOMO08828	0.0155414569908238
759	KWMTBOMO01855	KWMTBOMO06316	0.0154187932796578
760	KWMTBOMO01855	KWMTBOMO06532	0.0120631628630092
761	KWMTBOMO01855	KWMTBOMO01637	0.0204928450346426
762	KWMTBOMO01855	KWMTBOMO11649	0.0190311842265146
763	KWMTBOMO01855	KWMTBOMO02846	0.0221179353959635
764	KWMTBOMO01855	KWMTBOMO03122	0.0197186028967677
765	KWMTBOMO01855	KWMTBOMO06248	0.0197296931499563
766	KWMTBOMO01855	KWMTBOMO05956	0.0175473906426561
767	KWMTBOMO01855	KWMTBOMO14854	0.0208341774006511
768	KWMTBOMO01855	KWMTBOMO05242	0.0241699201455971
769	KWMTBOMO01855	KWMTBOMO11808	0.0263214597267722
770	KWMTBOMO01855	KWMTBOMO04778	0.0175026674196814
771	KWMTBOMO01855	KWMTBOMO14282	0.0138713861609997
772	KWMTBOMO01855	KWMTBOMO06040	0.0215870361509
773	KWMTBOMO01855	KWMTBOMO14164	0.0273394665182853
774	KWMTBOMO01855	KWMTBOMO04480	0.0214817927235015
775	KWMTBOMO01855	KWMTBOMO14773	0.0185145808394075
776	KWMTBOMO01855	KWMTBOMO12187	0.0220803383164082
777	KWMTBOMO01855	KWMTBOMO05428	0.016975983749436
778	KWMTBOMO01855	KWMTBOMO04937	0.0184569177611295
779	KWMTBOMO01855	KWMTBOMO11872	0.0190797053477276
780	KWMTBOMO01855	KWMTBOMO13228	0.0148041708484803
781	KWMTBOMO01855	KWMTBOMO13235	0.0191055705028521
782	KWMTBOMO01855	KWMTBOMO12195	0.0180140443717849
783	KWMTBOMO01855	KWMTBOMO04632	0.0228485698261279
784	KWMTBOMO01855	KWMTBOMO05111	0.0168995904872897
785	KWMTBOMO01855	KWMTBOMO06100	0.0184016952271159
786	KWMTBOMO01855	KWMTBOMO08145	0.0222819946838988
787	KWMTBOMO01855	KWMTBOMO09683	0.016284392619309
788	KWMTBOMO01855	KWMTBOMO01709	0.0328153643026868
789	KWMTBOMO01855	KWMTBOMO11867	0.0159808412962334
790	KWMTBOMO01855	KWMTBOMO15710	0.0183271532530368
791	KWMTBOMO01855	KWMTBOMO05744	0.0272183450431111
792	KWMTBOMO01855	KWMTBOMO15648	0.0202554498697846
793	KWMTBOMO01855	KWMTBOMO05364	0.0207823878846757
794	KWMTBOMO01855	KWMTBOMO08402	0.0213875538861025
795	KWMTBOMO01855	KWMTBOMO12617	0.0188409117148423
796	KWMTBOMO01855	KWMTBOMO08584	0.0183116337916691
797	KWMTBOMO01855	KWMTBOMO07374	0.0192721379522757
798	KWMTBOMO01855	KWMTBOMO09556	0.0177082356311431
799	KWMTBOMO01855	KWMTBOMO12434	0.0197743186769424
800	KWMTBOMO01855	KWMTBOMO10243	0.0191740348339722
801	KWMTBOMO01855	KWMTBOMO08364	0.0138715245900724
802	KWMTBOMO01855	KWMTBOMO01751	0.033120718490301
803	KWMTBOMO01855	KWMTBOMO05739	0.010934548416206
804	KWMTBOMO01855	KWMTBOMO11015	0.0211119395483783
805	KWMTBOMO01855	KWMTBOMO05056	0.0164809460874789
806	KWMTBOMO01855	KWMTBOMO14878	0.0223185138240367
807	KWMTBOMO01855	KWMTBOMO04788	0.0162243106923422
808	KWMTBOMO01855	KWMTBOMO15336	0.0205434651191247
809	KWMTBOMO01855	KWMTBOMO06330	0.0134884013611641
810	KWMTBOMO01855	KWMTBOMO01287	0.019426477201216
811	KWMTBOMO01855	KWMTBOMO13965	0.0231413852190875
812	KWMTBOMO01855	KWMTBOMO01003	0.0211335203356504
813	KWMTBOMO01855	KWMTBOMO05175	0.0262969077262441
814	KWMTBOMO01855	KWMTBOMO09357	0.0153997361589228
815	KWMTBOMO01855	KWMTBOMO10397	0.0124446880260664
816	KWMTBOMO01855	KWMTBOMO08400	0.0198339737348128
817	KWMTBOMO01855	KWMTBOMO11806	0.0157554503917758
818	KWMTBOMO01855	KWMTBOMO11188	0.0195752193493675
819	KWMTBOMO01855	KWMTBOMO14625	0.0224684186356667
820	KWMTBOMO01855	KWMTBOMO12305	0.0214708403343108
821	KWMTBOMO01855	KWMTBOMO05526	0.0207697275708465
822	KWMTBOMO01855	KWMTBOMO05503	0.0250733337904035
823	KWMTBOMO01855	KWMTBOMO16131	0.0301946605532152
824	KWMTBOMO01855	KWMTBOMO08441	0.0137818375266776
825	KWMTBOMO01855	KWMTBOMO09287	0.0242632610147181
826	KWMTBOMO01855	KWMTBOMO02904	0.0117491000609556
827	KWMTBOMO01855	KWMTBOMO05252	0.0196951286428642
828	KWMTBOMO01855	KWMTBOMO08868	0.0124292791891034
829	KWMTBOMO01948	KWMTBOMO07374	0.083473898045669
830	KWMTBOMO01948	KWMTBOMO06110	0.0197580073406645
831	KWMTBOMO01948	KWMTBOMO01707	0.0430984678765322
832	KWMTBOMO01948	KWMTBOMO08670	0.0675688962724303
833	KWMTBOMO01948	KWMTBOMO15992	0.0467700609192767
834	KWMTBOMO01948	KWMTBOMO13318	0.0509248120953973
835	KWMTBOMO01948	KWMTBOMO08828	0.0180248467990398
836	KWMTBOMO01948	KWMTBOMO12559	0.0501326748477429
837	KWMTBOMO01948	KWMTBOMO11649	0.0329368011120542
838	KWMTBOMO01948	KWMTBOMO08584	0.0720089476691043
839	KWMTBOMO01948	KWMTBOMO08330	0.0338051252294665
840	KWMTBOMO01948	KWMTBOMO01241	0.0421526529529465
841	KWMTBOMO01948	KWMTBOMO08740	0.0816988329634571
842	KWMTBOMO01948	KWMTBOMO01785	0.0331323638813545
843	KWMTBOMO01948	KWMTBOMO06532	0.0187230463137204
844	KWMTBOMO01948	KWMTBOMO09683	0.0255761023251743
845	KWMTBOMO01948	KWMTBOMO12629	0.055228969256982
846	KWMTBOMO01948	KWMTBOMO08441	0.0825095550971656
847	KWMTBOMO01948	KWMTBOMO12192	0.0990631755816507
848	KWMTBOMO01948	KWMTBOMO03862	0.0622356216159953
849	KWMTBOMO01948	KWMTBOMO11972	0.0523564814701086
850	KWMTBOMO01948	KWMTBOMO04632	0.0245287268807391
851	KWMTBOMO01948	KWMTBOMO08144	0.0242371791497951
852	KWMTBOMO01948	KWMTBOMO09556	0.0275447324287032
853	KWMTBOMO01948	KWMTBOMO10243	0.0691786446324207
854	KWMTBOMO01948	KWMTBOMO01518	0.0575397001834966
855	KWMTBOMO01948	KWMTBOMO05111	0.0506957824836365
856	KWMTBOMO01948	KWMTBOMO10322	0.0714598194856372
857	KWMTBOMO01948	KWMTBOMO15947	0.052752979404654
858	KWMTBOMO01948	KWMTBOMO09528	0.0420809913272341
859	KWMTBOMO01948	KWMTBOMO01003	0.0452292117631016
860	KWMTBOMO01948	KWMTBOMO02625	0.0401029486481863
861	KWMTBOMO01948	KWMTBOMO02211	0.0498640170224969
862	KWMTBOMO01948	KWMTBOMO14042	0.0326463162061231
863	KWMTBOMO01948	KWMTBOMO05357	0.0670895804100501
864	KWMTBOMO01948	KWMTBOMO05175	0.0473028331305317
865	KWMTBOMO01948	KWMTBOMO14272	0.0407692128302932
866	KWMTBOMO01948	KWMTBOMO08906	0.0358159435525845
867	KWMTBOMO01948	KWMTBOMO00167	0.0434159438370424
868	KWMTBOMO01948	KWMTBOMO09747	0.0434758477436982
869	KWMTBOMO01948	KWMTBOMO02846	0.0214442576760288
870	KWMTBOMO01948	KWMTBOMO12165	0.0545432627093816
871	KWMTBOMO01948	KWMTBOMO09918	0.0205644454994705
872	KWMTBOMO01948	KWMTBOMO05526	0.0622756185905443
873	KWMTBOMO01948	KWMTBOMO14431	0.0576271094418732
874	KWMTBOMO01948	KWMTBOMO12106	0.0886104599782974
875	KWMTBOMO01948	KWMTBOMO03346	0.0385782793585481
876	KWMTBOMO01948	KWMTBOMO10453	0.0598995316223359
877	KWMTBOMO01948	KWMTBOMO04815	0.0297639398131056
878	KWMTBOMO01948	KWMTBOMO11648	0.0519661355599632
879	KWMTBOMO01948	KWMTBOMO05744	0.0741499548390754
880	KWMTBOMO01948	KWMTBOMO03433	0.0395666048762463
881	KWMTBOMO01948	KWMTBOMO08339	0.0689409207024416
882	KWMTBOMO01948	KWMTBOMO00392	0.0909153076001491
883	KWMTBOMO01948	KWMTBOMO07107	0.0248632382321188
884	KWMTBOMO01948	KWMTBOMO11113	0.0436372401033821
885	KWMTBOMO01948	KWMTBOMO10518	0.0647416317868034
886	KWMTBOMO01948	KWMTBOMO07201	0.0703767995739577
887	KWMTBOMO01948	KWMTBOMO15485	0.0471027897842553
888	KWMTBOMO01948	KWMTBOMO01563	0.0610931434995889
889	KWMTBOMO01948	KWMTBOMO02152	0.0280308741068416
890	KWMTBOMO01948	KWMTBOMO03836	0.076303824807916
891	KWMTBOMO01948	KWMTBOMO11872	0.0576186014140675
892	KWMTBOMO01948	KWMTBOMO00157	0.142377165033425
893	KWMTBOMO01948	KWMTBOMO02645	0.0480030805014435
894	KWMTBOMO01948	KWMTBOMO02276	0.0852698547264182
895	KWMTBOMO01948	KWMTBOMO04778	0.031232317784946
896	KWMTBOMO01948	KWMTBOMO14854	0.0345855025214589
897	KWMTBOMO01948	KWMTBOMO09357	0.0245968865597556
898	KWMTBOMO01948	KWMTBOMO02904	0.0324283069377283
899	KWMTBOMO01948	KWMTBOMO08559	0.0209839018397943
900	KWMTBOMO01948	KWMTBOMO02991	0.0221387300744037
901	KWMTBOMO01948	KWMTBOMO14363	0.0336884482134188
902	KWMTBOMO01948	KWMTBOMO04788	0.0218699242468694
903	KWMTBOMO01948	KWMTBOMO08302	0.0623542113917409
904	KWMTBOMO01948	KWMTBOMO09124	0.0505927514681457
905	KWMTBOMO01948	KWMTBOMO11870	0.0873659922380601
906	KWMTBOMO01948	KWMTBOMO07642	0.0409756854663738
907	KWMTBOMO01948	KWMTBOMO12305	0.0319738338138176
908	KWMTBOMO01948	KWMTBOMO06501	0.0191698662544749
909	KWMTBOMO01948	KWMTBOMO14454	0.0734010380049947
910	KWMTBOMO01948	KWMTBOMO00640	0.0467306840165384
911	KWMTBOMO01948	KWMTBOMO10133	0.060939330801436
912	KWMTBOMO01948	KWMTBOMO07220	0.10714884972091
913	KWMTBOMO01948	KWMTBOMO09962	0.0257997579824555
914	KWMTBOMO01948	KWMTBOMO00535	0.146706108710641
915	KWMTBOMO01948	KWMTBOMO00712	0.0691982228148149
916	KWMTBOMO01948	KWMTBOMO05428	0.0853895982432856
917	KWMTBOMO01948	KWMTBOMO05242	0.0365317054334504
918	KWMTBOMO01948	KWMTBOMO12907	0.107069155493909
919	KWMTBOMO01948	KWMTBOMO06458	0.0492786545940947
920	KWMTBOMO01948	KWMTBOMO14658	0.0701595921230547
921	KWMTBOMO01948	KWMTBOMO00982	0.0514926883245274
922	KWMTBOMO01948	KWMTBOMO06531	0.0546345181925968
923	KWMTBOMO01948	KWMTBOMO00209	0.0236186833487357
924	KWMTBOMO01948	KWMTBOMO14462	0.0800996919789728
925	KWMTBOMO01948	KWMTBOMO07652	0.0956811190319094
926	KWMTBOMO01948	KWMTBOMO05132	0.0288919505663449
927	KWMTBOMO01948	KWMTBOMO15648	0.031208057985824
928	KWMTBOMO01948	KWMTBOMO16131	0.0382273818919133
929	KWMTBOMO01948	KWMTBOMO12725	0.0973503725061603
930	KWMTBOMO01948	KWMTBOMO12970	0.0605571401095844
931	KWMTBOMO01948	KWMTBOMO05194	0.0362264289206623
932	KWMTBOMO01948	KWMTBOMO06248	0.0462029573537281
933	KWMTBOMO01948	KWMTBOMO10397	0.0228336148771012
934	KWMTBOMO01948	KWMTBOMO04040	0.033680365269266
935	KWMTBOMO01948	KWMTBOMO08448	0.0239317756385528
936	KWMTBOMO01948	KWMTBOMO01851	0.0642261271475146
937	KWMTBOMO01948	KWMTBOMO05372	0.0751666873436044
938	KWMTBOMO01948	KWMTBOMO00883	0.0824248472529939
939	KWMTBOMO01948	KWMTBOMO03385	0.0922744316379399
940	KWMTBOMO01948	KWMTBOMO05364	0.0787868823960248
941	KWMTBOMO01948	KWMTBOMO05629	0.0413017785557203
942	KWMTBOMO01948	KWMTBOMO15946	0.165950091940119
943	KWMTBOMO01948	KWMTBOMO14625	0.0498477158315537
944	KWMTBOMO01948	KWMTBOMO06100	0.0733233603874977
945	KWMTBOMO01948	KWMTBOMO15679	0.0373010911644884
946	KWMTBOMO01948	KWMTBOMO14878	0.0615453969995391
947	KWMTBOMO01948	KWMTBOMO13780	0.0665479836039291
948	KWMTBOMO01948	KWMTBOMO15098	0.0601905041910244
949	KWMTBOMO01948	KWMTBOMO06460	0.0552747941958786
950	KWMTBOMO01948	KWMTBOMO06316	0.0376136171469916
951	KWMTBOMO01948	KWMTBOMO01862	0.0315866666688953
952	KWMTBOMO01948	KWMTBOMO08695	0.0308317838337832
953	KWMTBOMO01948	KWMTBOMO00211	0.0472757111654203
954	KWMTBOMO01948	KWMTBOMO11442	0.0494680361430761
955	KWMTBOMO01948	KWMTBOMO01637	0.0494232864601825
956	KWMTBOMO01948	KWMTBOMO07919	0.020655356324092
957	KWMTBOMO01948	KWMTBOMO11693	0.0257090138457658
958	KWMTBOMO01948	KWMTBOMO12187	0.0286151755295303
959	KWMTBOMO01948	KWMTBOMO06166	0.0226470124055804
960	KWMTBOMO01948	KWMTBOMO14773	0.0635427012816381
961	KWMTBOMO01948	KWMTBOMO11867	0.0706537275447419
962	KWMTBOMO01948	KWMTBOMO08981	0.0414060514887352
963	KWMTBOMO01948	KWMTBOMO05674	0.0314532482217968
964	KWMTBOMO01948	KWMTBOMO10958	0.0579845592812561
965	KWMTBOMO01948	KWMTBOMO14465	0.051299507659498
966	KWMTBOMO01948	KWMTBOMO08400	0.0314490350390333
967	KWMTBOMO01948	KWMTBOMO00525	0.0359031961877145
968	KWMTBOMO01948	KWMTBOMO14191	0.0516843040200942
969	KWMTBOMO01948	KWMTBOMO08843	0.0252603856391035
970	KWMTBOMO01948	KWMTBOMO03122	0.0362907790162183
971	KWMTBOMO01948	KWMTBOMO09551	0.0284952067502968
972	KWMTBOMO01948	KWMTBOMO11808	0.0229734766854942
973	KWMTBOMO01948	KWMTBOMO12920	0.030612796673788
974	KWMTBOMO01948	KWMTBOMO07373	0.0495233167584658
975	KWMTBOMO01948	KWMTBOMO09408	0.033135593679752
976	KWMTBOMO01948	KWMTBOMO14960	0.0429741694521567
977	KWMTBOMO01948	KWMTBOMO05427	0.0759288553251784
978	KWMTBOMO01948	KWMTBOMO09535	0.0274154861596045
979	KWMTBOMO01948	KWMTBOMO00501	0.0315707027520714
980	KWMTBOMO01948	KWMTBOMO04567	0.0426505316419307
981	KWMTBOMO01948	KWMTBOMO08364	0.0529180674190539
982	KWMTBOMO01948	KWMTBOMO15240	0.032849935082875
983	KWMTBOMO01948	KWMTBOMO01821	0.0522728638452224
984	KWMTBOMO01948	KWMTBOMO12107	0.0866331464677109
985	KWMTBOMO01948	KWMTBOMO01718	0.0685631821024374
986	KWMTBOMO01948	KWMTBOMO05739	0.123037453056883
987	KWMTBOMO01948	KWMTBOMO11763	0.0215088382110804
988	KWMTBOMO01948	KWMTBOMO08868	0.140578589470105
989	KWMTBOMO01948	KWMTBOMO05956	0.0644828257928171
990	KWMTBOMO01948	KWMTBOMO12434	0.0768171715440906
991	KWMTBOMO01948	KWMTBOMO01708	0.0500354684273666
992	KWMTBOMO01948	KWMTBOMO05725	0.0271052889040853
993	KWMTBOMO01948	KWMTBOMO15709	0.0636695703543682
994	KWMTBOMO01948	KWMTBOMO16301	0.0214903128536372
995	KWMTBOMO01948	KWMTBOMO05924	0.0572594521433392
996	KWMTBOMO01948	KWMTBOMO16176	0.0396303776796557
997	KWMTBOMO01948	KWMTBOMO05631	0.0845684740857895
998	KWMTBOMO01948	KWMTBOMO00425	0.0516069375121968
999	KWMTBOMO01948	KWMTBOMO06209	0.0405146301652762
1000	KWMTBOMO01948	KWMTBOMO15336	0.0875542876831293
1001	KWMTBOMO01948	KWMTBOMO08367	0.054188599205315
1002	KWMTBOMO01948	KWMTBOMO00591	0.0465937958581591
1003	KWMTBOMO01948	KWMTBOMO09043	0.047800527021652
1004	KWMTBOMO01948	KWMTBOMO06159	0.0603774096260529
1005	KWMTBOMO01948	KWMTBOMO10284	0.0316898213187202
1006	KWMTBOMO01948	KWMTBOMO08542	0.0681960973522337
1007	KWMTBOMO01948	KWMTBOMO07312	0.0509169893221283
1008	KWMTBOMO01948	KWMTBOMO14742	0.097524397310061
1009	KWMTBOMO01948	KWMTBOMO13965	0.0319577769997558
1010	KWMTBOMO01948	KWMTBOMO05252	0.0675122391131855
1011	KWMTBOMO01948	KWMTBOMO06330	0.0207884361424054
1012	KWMTBOMO01948	KWMTBOMO05056	0.0432711924614868
1013	KWMTBOMO01948	KWMTBOMO12479	0.0562231076861114
1014	KWMTBOMO01948	KWMTBOMO09811	0.0871024626013954
1015	KWMTBOMO01948	KWMTBOMO01751	0.0393492765369842
1016	KWMTBOMO01948	KWMTBOMO13832	0.114207054373635
1017	KWMTBOMO01948	KWMTBOMO07119	0.096290535971773
1018	KWMTBOMO01948	KWMTBOMO07128	0.0285407935902862
1019	KWMTBOMO01948	KWMTBOMO10176	0.062415983838785
1020	KWMTBOMO01948	KWMTBOMO04924	0.0353867080169841
1021	KWMTBOMO01948	KWMTBOMO09282	0.0673780807356016
1022	KWMTBOMO01948	KWMTBOMO00539	0.12502245569515
1023	KWMTBOMO01948	KWMTBOMO11188	0.0601028985327784
1024	KWMTBOMO01948	KWMTBOMO11605	0.0312492295116892
1025	KWMTBOMO01948	KWMTBOMO04029	0.0336598525128449
1026	KWMTBOMO01948	KWMTBOMO12486	0.0853796866309456
1027	KWMTBOMO01948	KWMTBOMO08145	0.0372334199531171
1028	KWMTBOMO01948	KWMTBOMO14036	0.0384778100024442
1029	KWMTBOMO01948	KWMTBOMO06040	0.0345425056709313
1030	KWMTBOMO01948	KWMTBOMO09492	0.0464339648234623
1031	KWMTBOMO01948	KWMTBOMO01662	0.0445774774834821
1032	KWMTBOMO01948	KWMTBOMO08196	0.0582432094346784
1033	KWMTBOMO01948	KWMTBOMO15710	0.0570598859132687
1034	KWMTBOMO01948	KWMTBOMO14164	0.0468305172739991
1035	KWMTBOMO01948	KWMTBOMO13235	0.0603527310736342
1036	KWMTBOMO01948	KWMTBOMO07516	0.128011286340184
1037	KWMTBOMO01948	KWMTBOMO08667	0.0275841132580593
1038	KWMTBOMO01948	KWMTBOMO04325	0.0407964094244687
1039	KWMTBOMO01948	KWMTBOMO10194	0.140880040248683
1040	KWMTBOMO01948	KWMTBOMO14476	0.0424809873875498
1041	KWMTBOMO01948	KWMTBOMO13315	0.0486516645584917
1042	KWMTBOMO01948	KWMTBOMO12523	0.0552353185745115
1043	KWMTBOMO01948	KWMTBOMO14269	0.026473443238754
1044	KWMTBOMO01948	KWMTBOMO16000	0.0203732218513371
1045	KWMTBOMO01948	KWMTBOMO06217	0.041229962560145
1046	KWMTBOMO01948	KWMTBOMO16437	0.0748931560800725
1047	KWMTBOMO01948	KWMTBOMO10545	0.0474327052766904
1048	KWMTBOMO01948	KWMTBOMO03449	0.0424172325923745
1049	KWMTBOMO01948	KWMTBOMO07562	0.0311169131302009
1050	KWMTBOMO01948	KWMTBOMO03861	0.062250828458596
1051	KWMTBOMO01948	KWMTBOMO03177	0.0359514322983823
1052	KWMTBOMO01948	KWMTBOMO11806	0.0520961549816837
1053	KWMTBOMO01948	KWMTBOMO12195	0.0292948664287486
1054	KWMTBOMO01948	KWMTBOMO04667	0.0352354576839409
1055	KWMTBOMO01948	KWMTBOMO05503	0.0438564261675368
1056	KWMTBOMO01948	KWMTBOMO13368	0.148514062882109
1057	KWMTBOMO01948	KWMTBOMO14282	0.159729222142572
1058	KWMTBOMO01948	KWMTBOMO15979	0.0642305014817003
1059	KWMTBOMO01948	KWMTBOMO10488	0.0702523364557682
1060	KWMTBOMO01948	KWMTBOMO04480	0.0500950898089924
1061	KWMTBOMO01948	KWMTBOMO02843	0.140776351670047
1062	KWMTBOMO01948	KWMTBOMO11084	0.0373851137867973
1063	KWMTBOMO01948	KWMTBOMO05162	0.0704120762566659
1064	KWMTBOMO01948	KWMTBOMO00621	0.040781812526713
1065	KWMTBOMO01948	KWMTBOMO00989	0.076881969449383
1066	KWMTBOMO01948	KWMTBOMO11015	0.0780308487050015
1067	KWMTBOMO01948	KWMTBOMO07948	0.0419606712508458
1068	KWMTBOMO01948	KWMTBOMO02993	0.0382143905837363
1069	KWMTBOMO01948	KWMTBOMO03279	0.0536813314547048
1070	KWMTBOMO01948	KWMTBOMO14076	0.0559861735986071
1071	KWMTBOMO01948	KWMTBOMO14077	0.0319038586138476
1072	KWMTBOMO01948	KWMTBOMO07114	0.0265375486435042
1073	KWMTBOMO01948	KWMTBOMO13228	0.102489821892623
1074	KWMTBOMO01948	KWMTBOMO09810	0.0850276957674165
1075	KWMTBOMO01948	KWMTBOMO15877	0.03586986473606
1076	KWMTBOMO01948	KWMTBOMO14418	0.0508957271540887
1077	KWMTBOMO01948	KWMTBOMO12617	0.0672815550720108
1078	KWMTBOMO01948	KWMTBOMO13787	0.0785479427854202
1079	KWMTBOMO01948	KWMTBOMO09119	0.0403506428311937
1080	KWMTBOMO01948	KWMTBOMO09287	0.0749996114058218
1081	KWMTBOMO01948	KWMTBOMO03450	0.0777954538924145
1082	KWMTBOMO01948	KWMTBOMO05741	0.0441229704172617
1083	KWMTBOMO01948	KWMTBOMO08918	0.0339792419448739
1084	KWMTBOMO01948	KWMTBOMO15761	0.0724461103425482
1085	KWMTBOMO01948	KWMTBOMO03306	0.0761031790906694
1086	KWMTBOMO01948	KWMTBOMO04937	0.0493797267923773
1087	KWMTBOMO01948	KWMTBOMO12566	0.0244195019931325
1088	KWMTBOMO01948	KWMTBOMO15980	0.0443736195446983
1089	KWMTBOMO01948	KWMTBOMO06542	0.0411515455966834
1090	KWMTBOMO01948	KWMTBOMO11868	0.0368254996695448
1091	KWMTBOMO01948	KWMTBOMO03302	0.0380832439096257
1092	KWMTBOMO01948	KWMTBOMO01709	0.0481564664080641
1093	KWMTBOMO01948	KWMTBOMO14055	0.036017408954887
1094	KWMTBOMO01948	KWMTBOMO03798	0.0239113949766545
1095	KWMTBOMO01948	KWMTBOMO08402	0.0494984297571612
1096	KWMTBOMO01948	KWMTBOMO05421	0.0289258204370353
1097	KWMTBOMO01948	KWMTBOMO11805	0.0542908334608738
1098	KWMTBOMO01948	KWMTBOMO01341	0.145354616687717
1099	KWMTBOMO01948	KWMTBOMO00988	0.0594676434885873
1100	KWMTBOMO01948	KWMTBOMO16135	0.0205010690866575
1101	KWMTBOMO01948	KWMTBOMO10131	0.0485928457504079
1102	KWMTBOMO01948	KWMTBOMO02165	0.101754264216369
1103	KWMTBOMO01948	KWMTBOMO04554	0.0431725198954827
1104	KWMTBOMO01948	KWMTBOMO01287	0.0361310049795062
1105	KWMTBOMO01993	KWMTBOMO00392	0.0156392188451228
1106	KWMTBOMO01993	KWMTBOMO00525	0.0200607421924879
1107	KWMTBOMO01993	KWMTBOMO05111	0.0205524890447827
1108	KWMTBOMO01993	KWMTBOMO05364	0.0249910808802847
1109	KWMTBOMO01993	KWMTBOMO14465	0.0240987616583369
1110	KWMTBOMO01993	KWMTBOMO09918	0.0158595688674633
1111	KWMTBOMO01993	KWMTBOMO01751	0.0269386066796693
1112	KWMTBOMO01993	KWMTBOMO00535	0.0163941110580623
1113	KWMTBOMO01993	KWMTBOMO07374	0.0226205184394809
1114	KWMTBOMO01993	KWMTBOMO16135	0.0123686191666875
1115	KWMTBOMO01993	KWMTBOMO01862	0.0212315862722815
1116	KWMTBOMO01993	KWMTBOMO11113	0.0258705731363414
1117	KWMTBOMO01993	KWMTBOMO12970	0.0279383037999357
1118	KWMTBOMO01993	KWMTBOMO06330	0.0135376891365948
1119	KWMTBOMO01993	KWMTBOMO08330	0.0179620191805487
1120	KWMTBOMO01993	KWMTBOMO05162	0.0240082390463252
1121	KWMTBOMO01993	KWMTBOMO08441	0.0194181239144319
1122	KWMTBOMO01993	KWMTBOMO10545	0.0228749136555817
1123	KWMTBOMO01993	KWMTBOMO01637	0.018174618994944
1124	KWMTBOMO01993	KWMTBOMO00883	0.0118865509340716
1125	KWMTBOMO01993	KWMTBOMO04667	0.0189463186288334
1126	KWMTBOMO01993	KWMTBOMO09119	0.0168950817941121
1127	KWMTBOMO01993	KWMTBOMO09408	0.031150340694246
1128	KWMTBOMO01993	KWMTBOMO11806	0.0311392115225503
1129	KWMTBOMO01993	KWMTBOMO14462	0.0253799944773703
1130	KWMTBOMO01993	KWMTBOMO09810	0.0212624152593046
1131	KWMTBOMO01993	KWMTBOMO15979	0.0191722625255359
1132	KWMTBOMO01993	KWMTBOMO07919	0.0124126470791182
1133	KWMTBOMO01993	KWMTBOMO14272	0.0216898317623919
1134	KWMTBOMO01993	KWMTBOMO06501	0.0137574539702326
1135	KWMTBOMO01993	KWMTBOMO07948	0.0237916199222729
1136	KWMTBOMO01993	KWMTBOMO02211	0.0280294463592991
1137	KWMTBOMO01993	KWMTBOMO00621	0.0184047030449414
1138	KWMTBOMO01993	KWMTBOMO10176	0.0234077573571488
1139	KWMTBOMO01993	KWMTBOMO11084	0.0234121208475247
1140	KWMTBOMO01993	KWMTBOMO01287	0.0174863116738218
1141	KWMTBOMO01993	KWMTBOMO15980	0.0229850620260146
1142	KWMTBOMO01993	KWMTBOMO14854	0.022374003020764
1143	KWMTBOMO01993	KWMTBOMO01707	0.0211849957315169
1144	KWMTBOMO01993	KWMTBOMO13780	0.013503270404498
1145	KWMTBOMO01993	KWMTBOMO02904	0.01765085079573
1146	KWMTBOMO01993	KWMTBOMO09683	0.0191770932288359
1147	KWMTBOMO01993	KWMTBOMO15336	0.027997342016965
1148	KWMTBOMO01993	KWMTBOMO12523	0.0278396632344033
1149	KWMTBOMO01993	KWMTBOMO14269	0.0170364577083632
1150	KWMTBOMO01993	KWMTBOMO09962	0.0167287982276354
1151	KWMTBOMO01993	KWMTBOMO06159	0.0200501598755706
1152	KWMTBOMO01993	KWMTBOMO08584	0.0157948880580163
1153	KWMTBOMO01993	KWMTBOMO07373	0.0278417930216871
1154	KWMTBOMO01993	KWMTBOMO08740	0.0211810455417147
1155	KWMTBOMO01993	KWMTBOMO11870	0.0177859940411718
1156	KWMTBOMO01993	KWMTBOMO06110	0.0116658439371328
1157	KWMTBOMO01993	KWMTBOMO14742	0.0197051972789064
1158	KWMTBOMO01993	KWMTBOMO15709	0.0266611948743107
1159	KWMTBOMO01993	KWMTBOMO00989	0.0189652094340377
1160	KWMTBOMO01993	KWMTBOMO05357	0.0215197615646482
1161	KWMTBOMO01993	KWMTBOMO12920	0.0203464141534367
1162	KWMTBOMO01993	KWMTBOMO04567	0.0226287478015672
1163	KWMTBOMO01993	KWMTBOMO03279	0.021708667674676
1164	KWMTBOMO01993	KWMTBOMO06531	0.0210289282820445
1165	KWMTBOMO01993	KWMTBOMO10453	0.0193898172369146
1166	KWMTBOMO01993	KWMTBOMO14658	0.0183830605928389
1167	KWMTBOMO01993	KWMTBOMO05194	0.0203799798818692
1168	KWMTBOMO01993	KWMTBOMO09282	0.0264270557508198
1169	KWMTBOMO01993	KWMTBOMO03346	0.0216177234415907
1170	KWMTBOMO01993	KWMTBOMO09287	0.0297265314334344
1171	KWMTBOMO01993	KWMTBOMO04937	0.0234918815790083
1172	KWMTBOMO01993	KWMTBOMO12106	0.0194818528043566
1173	KWMTBOMO01993	KWMTBOMO01662	0.0208074952425774
1174	KWMTBOMO01993	KWMTBOMO09357	0.0162913881327932
1175	KWMTBOMO01993	KWMTBOMO00712	0.0157634853972774
1176	KWMTBOMO01993	KWMTBOMO05526	0.0204750630476517
1177	KWMTBOMO01993	KWMTBOMO00157	0.016848252568155
1178	KWMTBOMO01993	KWMTBOMO10322	0.0274054086321971
1179	KWMTBOMO01993	KWMTBOMO08339	0.0361993376230037
1180	KWMTBOMO01993	KWMTBOMO08367	0.0200167979535862
1181	KWMTBOMO01993	KWMTBOMO04924	0.0205748483197808
1182	KWMTBOMO01993	KWMTBOMO03862	0.0258213730888948
1183	KWMTBOMO01993	KWMTBOMO10243	0.0245778484355653
1184	KWMTBOMO01993	KWMTBOMO11442	0.0205460035192874
1185	KWMTBOMO01993	KWMTBOMO08906	0.0163829728499572
1186	KWMTBOMO01993	KWMTBOMO08302	0.014161698205449
1187	KWMTBOMO01993	KWMTBOMO02991	0.0131931882092286
1188	KWMTBOMO01993	KWMTBOMO02645	0.021938121759939
1189	KWMTBOMO01993	KWMTBOMO07642	0.0245671796280477
1190	KWMTBOMO01993	KWMTBOMO05427	0.0255564569563509
1191	KWMTBOMO01993	KWMTBOMO03450	0.0277727461729446
1192	KWMTBOMO01993	KWMTBOMO09556	0.0168607086924497
1193	KWMTBOMO01993	KWMTBOMO12434	0.0260688816365878
1194	KWMTBOMO01993	KWMTBOMO05175	0.0237455565062993
1195	KWMTBOMO01993	KWMTBOMO01341	0.0115678987065891
1196	KWMTBOMO01993	KWMTBOMO01851	0.0203492154752534
1197	KWMTBOMO01993	KWMTBOMO08670	0.0237155075764181
1198	KWMTBOMO01993	KWMTBOMO05242	0.0183829603977425
1199	KWMTBOMO01993	KWMTBOMO09528	0.0205369865804536
1200	KWMTBOMO01993	KWMTBOMO07516	0.012174138097816
1201	KWMTBOMO01993	KWMTBOMO15648	0.0168405380889469
1202	KWMTBOMO01993	KWMTBOMO05725	0.0218258651564348
1203	KWMTBOMO01993	KWMTBOMO12629	0.0245606585874715
1204	KWMTBOMO01993	KWMTBOMO12305	0.0361214455921944
1205	KWMTBOMO01993	KWMTBOMO08144	0.0191529904336678
1206	KWMTBOMO01993	KWMTBOMO07201	0.0281013990577244
1207	KWMTBOMO01993	KWMTBOMO13965	0.0216041995135071
1208	KWMTBOMO01993	KWMTBOMO14164	0.0225090745639797
1209	KWMTBOMO01993	KWMTBOMO07652	0.0236224300806895
1210	KWMTBOMO01993	KWMTBOMO11867	0.0160760498149909
1211	KWMTBOMO01993	KWMTBOMO01718	0.0198819926140251
1212	KWMTBOMO01993	KWMTBOMO08981	0.0170599383404176
1213	KWMTBOMO01993	KWMTBOMO11868	0.0232931120183684
1214	KWMTBOMO01993	KWMTBOMO06248	0.0231575670303109
1215	KWMTBOMO01993	KWMTBOMO08868	0.0151871969072433
1216	KWMTBOMO01993	KWMTBOMO06040	0.0226123117991566
1217	KWMTBOMO01993	KWMTBOMO01563	0.0230642154656013
1218	KWMTBOMO01993	KWMTBOMO09811	0.0178315484342787
1219	KWMTBOMO01993	KWMTBOMO00501	0.0179117542383415
1220	KWMTBOMO01993	KWMTBOMO12192	0.0235346434613853
1221	KWMTBOMO01993	KWMTBOMO04632	0.0177611795653222
1222	KWMTBOMO01993	KWMTBOMO07220	0.0241374767775865
1223	KWMTBOMO01993	KWMTBOMO12725	0.0207738894241886
1224	KWMTBOMO01993	KWMTBOMO05741	0.0162622469039526
1225	KWMTBOMO01993	KWMTBOMO12617	0.0271577679536366
1226	KWMTBOMO01993	KWMTBOMO02152	0.0187097910850269
1227	KWMTBOMO01993	KWMTBOMO10397	0.0140556538660122
1228	KWMTBOMO01993	KWMTBOMO11605	0.0250407304670816
1229	KWMTBOMO01993	KWMTBOMO14878	0.0299016497718052
1230	KWMTBOMO01993	KWMTBOMO14282	0.0140666479104723
1231	KWMTBOMO01993	KWMTBOMO00988	0.0183765052285679
1232	KWMTBOMO01993	KWMTBOMO10284	0.019631141140463
1233	KWMTBOMO01993	KWMTBOMO15098	0.0252813664792576
1234	KWMTBOMO01993	KWMTBOMO05674	0.0172007064672513
1235	KWMTBOMO01993	KWMTBOMO06209	0.0180002092390179
1236	KWMTBOMO01993	KWMTBOMO13787	0.0160479228088027
1237	KWMTBOMO01993	KWMTBOMO11648	0.0234433494527777
1238	KWMTBOMO01993	KWMTBOMO04325	0.0234792980292981
1239	KWMTBOMO01993	KWMTBOMO05739	0.0120135245774294
1240	KWMTBOMO01993	KWMTBOMO13368	0.0163656290687091
1241	KWMTBOMO01993	KWMTBOMO12479	0.0298933819648834
1242	KWMTBOMO01993	KWMTBOMO10133	0.0293527858970247
1243	KWMTBOMO01993	KWMTBOMO14042	0.0209444106524666
1244	KWMTBOMO01993	KWMTBOMO05924	0.028973574536539
1245	KWMTBOMO01993	KWMTBOMO06542	0.026625081849892
1246	KWMTBOMO01993	KWMTBOMO14625	0.0320618805585832
1247	KWMTBOMO01993	KWMTBOMO06166	0.0139332340743866
1248	KWMTBOMO01993	KWMTBOMO00539	0.0227811964878477
1249	KWMTBOMO01993	KWMTBOMO15485	0.0230291607445384
1250	KWMTBOMO01993	KWMTBOMO02843	0.0139756654778102
1251	KWMTBOMO01993	KWMTBOMO00982	0.0218160633168691
1252	KWMTBOMO01993	KWMTBOMO11693	0.0190474215749418
1253	KWMTBOMO01993	KWMTBOMO04778	0.0292713429643493
1254	KWMTBOMO01993	KWMTBOMO00211	0.0224657904881864
1255	KWMTBOMO01993	KWMTBOMO08667	0.0171032565583145
1256	KWMTBOMO01993	KWMTBOMO11972	0.0232179190721788
1257	KWMTBOMO01993	KWMTBOMO16131	0.0230657186976789
1258	KWMTBOMO01993	KWMTBOMO03449	0.0311337441498276
1259	KWMTBOMO01993	KWMTBOMO15946	0.0181397508564354
1260	KWMTBOMO01993	KWMTBOMO14960	0.0240724622451943
1261	KWMTBOMO01993	KWMTBOMO13318	0.0183367707343897
1262	KWMTBOMO01993	KWMTBOMO15240	0.0113421639086775
1263	KWMTBOMO01993	KWMTBOMO14076	0.0247702596499677
1264	KWMTBOMO01993	KWMTBOMO05421	0.0231395348469047
1265	KWMTBOMO01993	KWMTBOMO14773	0.0231820797931386
1266	KWMTBOMO01993	KWMTBOMO02993	0.0179933804014347
1267	KWMTBOMO01993	KWMTBOMO14431	0.0229204013148822
1268	KWMTBOMO01993	KWMTBOMO12107	0.0258150401981785
1269	KWMTBOMO01993	KWMTBOMO05744	0.0215420001564357
1270	KWMTBOMO01993	KWMTBOMO14418	0.0226406919010948
1271	KWMTBOMO01993	KWMTBOMO08400	0.0195164750171222
1272	KWMTBOMO01993	KWMTBOMO14055	0.0128633982523345
1273	KWMTBOMO01993	KWMTBOMO04815	0.0199559316205859
1274	KWMTBOMO01993	KWMTBOMO12559	0.0215473457657758
1275	KWMTBOMO01993	KWMTBOMO15947	0.0255087172681835
1276	KWMTBOMO01993	KWMTBOMO08542	0.0211440823411556
1277	KWMTBOMO01993	KWMTBOMO06532	0.0160165944480653
1278	KWMTBOMO01993	KWMTBOMO11649	0.0222227921055133
1279	KWMTBOMO01993	KWMTBOMO05252	0.0253363570770979
1280	KWMTBOMO01993	KWMTBOMO12187	0.0172994450652258
1281	KWMTBOMO01993	KWMTBOMO02846	0.0119577917089703
1282	KWMTBOMO01993	KWMTBOMO12486	0.0117673362808151
1283	KWMTBOMO01993	KWMTBOMO12566	0.0156486853349964
1284	KWMTBOMO01993	KWMTBOMO07107	0.0150935875288709
1285	KWMTBOMO01993	KWMTBOMO16176	0.0204215627601599
1286	KWMTBOMO01993	KWMTBOMO15679	0.0220022226751973
1287	KWMTBOMO01993	KWMTBOMO03177	0.0124466727913524
1288	KWMTBOMO01993	KWMTBOMO04480	0.0379332019159693
1289	KWMTBOMO01993	KWMTBOMO05956	0.0290551386190513
1290	KWMTBOMO01993	KWMTBOMO05629	0.0237314808486591
1291	KWMTBOMO01993	KWMTBOMO00425	0.0265251007640291
1292	KWMTBOMO01993	KWMTBOMO02165	0.0150152747283875
1293	KWMTBOMO01993	KWMTBOMO10518	0.0265396072607163
1294	KWMTBOMO01993	KWMTBOMO15761	0.0180025251801939
1295	KWMTBOMO01993	KWMTBOMO07562	0.0205487119500468
1296	KWMTBOMO01993	KWMTBOMO09043	0.0181613644593439
1297	KWMTBOMO01993	KWMTBOMO07128	0.0185764777420669
1298	KWMTBOMO01993	KWMTBOMO15992	0.0213775248907056
1299	KWMTBOMO01993	KWMTBOMO08918	0.0226616238071772
1300	KWMTBOMO01993	KWMTBOMO05631	0.0205351820736411
1301	KWMTBOMO01993	KWMTBOMO00209	0.0144674652030064
1302	KWMTBOMO01993	KWMTBOMO06100	0.0219896242487868
1303	KWMTBOMO01993	KWMTBOMO08364	0.0248597329830468
1304	KWMTBOMO01993	KWMTBOMO13235	0.032199353314305
1305	KWMTBOMO01993	KWMTBOMO03122	0.0306406565751994
1306	KWMTBOMO01993	KWMTBOMO01241	0.0238733015607096
1307	KWMTBOMO01993	KWMTBOMO16437	0.026922213552919
1308	KWMTBOMO01993	KWMTBOMO11808	0.0142796191603321
1309	KWMTBOMO01993	KWMTBOMO08559	0.0124682376950604
1310	KWMTBOMO01993	KWMTBOMO10488	0.025832337146642
1311	KWMTBOMO01993	KWMTBOMO11872	0.0274201348984709
1312	KWMTBOMO01993	KWMTBOMO01785	0.0197913138644086
1313	KWMTBOMO01993	KWMTBOMO08828	0.0127908819367923
1314	KWMTBOMO01993	KWMTBOMO02276	0.0289223094770784
1315	KWMTBOMO01993	KWMTBOMO09492	0.0306393771544393
1316	KWMTBOMO01993	KWMTBOMO11805	0.017895919415273
1317	KWMTBOMO01993	KWMTBOMO03306	0.00997149273001106
1318	KWMTBOMO01993	KWMTBOMO14363	0.017182840701672
1319	KWMTBOMO01993	KWMTBOMO14476	0.0300844453336819
1320	KWMTBOMO01993	KWMTBOMO16000	0.0136179187486561
1321	KWMTBOMO01993	KWMTBOMO10131	0.018200398956393
1322	KWMTBOMO01993	KWMTBOMO00591	0.0233764396582374
1323	KWMTBOMO01993	KWMTBOMO15877	0.0237639262581913
1324	KWMTBOMO01993	KWMTBOMO13315	0.0304725854298897
1325	KWMTBOMO01993	KWMTBOMO03861	0.019412672450982
1326	KWMTBOMO01993	KWMTBOMO12165	0.0236283691345234
1327	KWMTBOMO01993	KWMTBOMO00640	0.0194594473015701
1328	KWMTBOMO01993	KWMTBOMO05428	0.0170956503221566
1329	KWMTBOMO01993	KWMTBOMO06217	0.0231264116976472
1330	KWMTBOMO01993	KWMTBOMO10958	0.0237934056347423
1331	KWMTBOMO01993	KWMTBOMO03302	0.0118138438271932
1332	KWMTBOMO01993	KWMTBOMO12907	0.0257184341623252
1333	KWMTBOMO01993	KWMTBOMO07312	0.0200448003585232
1334	KWMTBOMO01993	KWMTBOMO08695	0.0196613038186622
1335	KWMTBOMO01993	KWMTBOMO01003	0.0207444161703941
1336	KWMTBOMO01993	KWMTBOMO14077	0.0180448840764215
1337	KWMTBOMO01993	KWMTBOMO13228	0.0140056532012965
1338	KWMTBOMO01993	KWMTBOMO09124	0.022904357587164
1339	KWMTBOMO01993	KWMTBOMO08843	0.0203994681944807
1340	KWMTBOMO01993	KWMTBOMO13832	0.0178151328369175
1341	KWMTBOMO01993	KWMTBOMO01518	0.01908153897817
1342	KWMTBOMO01993	KWMTBOMO03798	0.014217740179049
1343	KWMTBOMO01993	KWMTBOMO04040	0.0167625788409849
1344	KWMTBOMO01993	KWMTBOMO08448	0.0210061240711472
1345	KWMTBOMO01993	KWMTBOMO09747	0.0215056301435691
1346	KWMTBOMO01993	KWMTBOMO00167	0.0243060295072431
1347	KWMTBOMO01993	KWMTBOMO01708	0.0277294232157344
1348	KWMTBOMO01993	KWMTBOMO06460	0.0282500913272694
1349	KWMTBOMO01993	KWMTBOMO14191	0.0234253996110875
1350	KWMTBOMO01993	KWMTBOMO03836	0.0226059996899652
1351	KWMTBOMO01993	KWMTBOMO06458	0.0293951499192965
1352	KWMTBOMO01993	KWMTBOMO01709	0.0258937867136042
1353	KWMTBOMO01993	KWMTBOMO09551	0.0230206236803187
1354	KWMTBOMO01993	KWMTBOMO01821	0.0311641638642489
1355	KWMTBOMO01993	KWMTBOMO04554	0.0218935061619993
1356	KWMTBOMO01993	KWMTBOMO12195	0.0195624666995898
1357	KWMTBOMO01993	KWMTBOMO08145	0.0254962260684191
1358	KWMTBOMO01993	KWMTBOMO09535	0.0141392140093696
1359	KWMTBOMO01993	KWMTBOMO11188	0.0225994900205931
1360	KWMTBOMO01993	KWMTBOMO11015	0.0224958376802813
1361	KWMTBOMO01993	KWMTBOMO08196	0.0245785462534932
1362	KWMTBOMO01993	KWMTBOMO04029	0.0209771685053037
1363	KWMTBOMO01993	KWMTBOMO05503	0.0236372634817375
1364	KWMTBOMO01993	KWMTBOMO06316	0.0192974881308649
1365	KWMTBOMO01993	KWMTBOMO08402	0.0280723660365827
1366	KWMTBOMO01993	KWMTBOMO07114	0.0108823667697506
1367	KWMTBOMO01993	KWMTBOMO05372	0.0206739759411137
1368	KWMTBOMO01993	KWMTBOMO07119	0.023226000557719
1369	KWMTBOMO01993	KWMTBOMO05056	0.014907166016018
1370	KWMTBOMO01993	KWMTBOMO04788	0.013133721059625
1371	KWMTBOMO01993	KWMTBOMO14036	0.0183641553047346
1372	KWMTBOMO01993	KWMTBOMO11763	0.0130967364620192
1373	KWMTBOMO01993	KWMTBOMO15710	0.0257523561442253
1374	KWMTBOMO01993	KWMTBOMO10194	0.0220978255770381
1375	KWMTBOMO01993	KWMTBOMO02625	0.0196925769924207
1376	KWMTBOMO01993	KWMTBOMO03385	0.0162811142823177
1377	KWMTBOMO01993	KWMTBOMO14454	0.024573506973486
1378	KWMTBOMO01993	KWMTBOMO05132	0.0184888798348745
1379	KWMTBOMO01993	KWMTBOMO16301	0.0120198858808219
1380	KWMTBOMO01993	KWMTBOMO03433	0.0219929677317788
1381	KWMTBOMO02516	KWMTBOMO09683	0.0199336332538817
1382	KWMTBOMO02516	KWMTBOMO15648	0.0255261661574096
1383	KWMTBOMO02516	KWMTBOMO11188	0.0388971130687145
1384	KWMTBOMO02516	KWMTBOMO09124	0.0399726421866505
1385	KWMTBOMO02516	KWMTBOMO09528	0.0324437721624632
1386	KWMTBOMO02516	KWMTBOMO01287	0.0341620581425439
1387	KWMTBOMO02516	KWMTBOMO06531	0.0436102808385521
1388	KWMTBOMO02516	KWMTBOMO05674	0.0375690409853658
1389	KWMTBOMO02516	KWMTBOMO14076	0.028753100559382
1390	KWMTBOMO02516	KWMTBOMO05427	0.0329560845648196
1391	KWMTBOMO02516	KWMTBOMO10322	0.031592350671893
1392	KWMTBOMO02516	KWMTBOMO08695	0.0471697971059814
1393	KWMTBOMO02516	KWMTBOMO01785	0.0498555605941156
1394	KWMTBOMO02516	KWMTBOMO10958	0.0316182298363252
1395	KWMTBOMO02516	KWMTBOMO04937	0.0322012558410074
1396	KWMTBOMO02516	KWMTBOMO12920	0.0333518165086606
1397	KWMTBOMO02516	KWMTBOMO05056	0.0227961216401632
1398	KWMTBOMO02516	KWMTBOMO03450	0.0457228558816205
1399	KWMTBOMO02516	KWMTBOMO11649	0.0403637175314575
1400	KWMTBOMO02516	KWMTBOMO12434	0.0352028055853908
1401	KWMTBOMO02516	KWMTBOMO06166	0.0288722889201776
1402	KWMTBOMO02516	KWMTBOMO11868	0.0390878322178801
1403	KWMTBOMO02516	KWMTBOMO04325	0.0295781654603595
1404	KWMTBOMO02516	KWMTBOMO01563	0.0345082127900557
1405	KWMTBOMO02516	KWMTBOMO06100	0.0417247904962321
1406	KWMTBOMO02516	KWMTBOMO15709	0.0293628881466448
1407	KWMTBOMO02516	KWMTBOMO15098	0.0278738111706819
1408	KWMTBOMO02516	KWMTBOMO13318	0.0294468927085924
1409	KWMTBOMO02516	KWMTBOMO01851	0.0363709623460204
1410	KWMTBOMO02516	KWMTBOMO00167	0.0229267775286218
1411	KWMTBOMO02516	KWMTBOMO03433	0.036990989583959
1412	KWMTBOMO02516	KWMTBOMO00539	0.0242826217271798
1413	KWMTBOMO02516	KWMTBOMO07652	0.0322624206300346
1414	KWMTBOMO02516	KWMTBOMO08868	0.0327739138998196
1415	KWMTBOMO02516	KWMTBOMO01518	0.0233871278511064
1416	KWMTBOMO02516	KWMTBOMO12970	0.0349650348395654
1417	KWMTBOMO02516	KWMTBOMO06159	0.0331049705101394
1418	KWMTBOMO02516	KWMTBOMO01003	0.0300132543624932
1419	KWMTBOMO02516	KWMTBOMO14960	0.0359859817670557
1420	KWMTBOMO02516	KWMTBOMO01662	0.0368445357347181
1421	KWMTBOMO02516	KWMTBOMO06542	0.0321649919346225
1422	KWMTBOMO02516	KWMTBOMO08981	0.0459785975019896
1423	KWMTBOMO02516	KWMTBOMO03346	0.0262265938455296
1424	KWMTBOMO02516	KWMTBOMO02211	0.0249634531885708
1425	KWMTBOMO02516	KWMTBOMO14465	0.0401172601633881
1426	KWMTBOMO02516	KWMTBOMO12479	0.0434611524773981
1427	KWMTBOMO02516	KWMTBOMO10397	0.0298786166005947
1428	KWMTBOMO02516	KWMTBOMO08302	0.0711919027511431
1429	KWMTBOMO02516	KWMTBOMO05242	0.0324875606244842
1430	KWMTBOMO02516	KWMTBOMO11972	0.0223894228277971
1431	KWMTBOMO02516	KWMTBOMO02165	0.0215979566795492
1432	KWMTBOMO02516	KWMTBOMO14462	0.0337335348786505
1433	KWMTBOMO02516	KWMTBOMO02991	0.062427663349235
1434	KWMTBOMO02516	KWMTBOMO14476	0.0306010195159993
1435	KWMTBOMO02516	KWMTBOMO01707	0.0325409707143492
1436	KWMTBOMO02516	KWMTBOMO00982	0.0210221136089662
1437	KWMTBOMO02516	KWMTBOMO10284	0.0238786209160188
1438	KWMTBOMO02516	KWMTBOMO15485	0.0277455625777679
1439	KWMTBOMO02516	KWMTBOMO15336	0.0257861082404964
1440	KWMTBOMO02516	KWMTBOMO03122	0.0255139502125652
1441	KWMTBOMO02516	KWMTBOMO10488	0.0382004877686471
1442	KWMTBOMO02516	KWMTBOMO07516	0.0286261410769743
1443	KWMTBOMO02516	KWMTBOMO05372	0.020079212983323
1444	KWMTBOMO02516	KWMTBOMO05194	0.0258365370222126
1445	KWMTBOMO02516	KWMTBOMO08330	0.0370746362708833
1446	KWMTBOMO02516	KWMTBOMO00157	0.0269865850278934
1447	KWMTBOMO02516	KWMTBOMO14431	0.0309773872799319
1448	KWMTBOMO02516	KWMTBOMO00621	0.0301771956526337
1449	KWMTBOMO02516	KWMTBOMO06217	0.0316835350247731
1450	KWMTBOMO02516	KWMTBOMO07919	0.034401503313198
1451	KWMTBOMO02516	KWMTBOMO08667	0.025570013201479
1452	KWMTBOMO02516	KWMTBOMO09357	0.0242782748598902
1453	KWMTBOMO02516	KWMTBOMO15992	0.0309795680112021
1454	KWMTBOMO02516	KWMTBOMO04667	0.0330127892681599
1455	KWMTBOMO02516	KWMTBOMO03302	0.0310972386458864
1456	KWMTBOMO02516	KWMTBOMO15980	0.0262483119814803
1457	KWMTBOMO02516	KWMTBOMO02993	0.0361278128499425
1458	KWMTBOMO02516	KWMTBOMO03385	0.0300107045294668
1459	KWMTBOMO02516	KWMTBOMO11442	0.0356365551474512
1460	KWMTBOMO02516	KWMTBOMO00988	0.0327576214330878
1461	KWMTBOMO02516	KWMTBOMO07374	0.0286437401586002
1462	KWMTBOMO02516	KWMTBOMO08740	0.0329126168176264
1463	KWMTBOMO02516	KWMTBOMO12486	0.0359212914843306
1464	KWMTBOMO02516	KWMTBOMO13228	0.0382116315465367
1465	KWMTBOMO02516	KWMTBOMO07107	0.0476598317249733
1466	KWMTBOMO02516	KWMTBOMO08400	0.0293969928563551
1467	KWMTBOMO02516	KWMTBOMO04815	0.0198310258830068
1468	KWMTBOMO02516	KWMTBOMO05629	0.0362781959424622
1469	KWMTBOMO02516	KWMTBOMO09119	0.037020402749421
1470	KWMTBOMO02516	KWMTBOMO08828	0.0278181171492664
1471	KWMTBOMO02516	KWMTBOMO11648	0.0280176505722166
1472	KWMTBOMO02516	KWMTBOMO08339	0.0258672492350438
1473	KWMTBOMO02516	KWMTBOMO01862	0.0227059763829371
1474	KWMTBOMO02516	KWMTBOMO08145	0.0251899839976479
1475	KWMTBOMO02516	KWMTBOMO11693	0.0240507566233056
1476	KWMTBOMO02516	KWMTBOMO13368	0.0261753778292146
1477	KWMTBOMO02516	KWMTBOMO09408	0.0173127670547271
1478	KWMTBOMO02516	KWMTBOMO15947	0.0263450834917407
1479	KWMTBOMO02516	KWMTBOMO12559	0.0397958803122127
1480	KWMTBOMO02516	KWMTBOMO08670	0.0266803237366781
1481	KWMTBOMO02516	KWMTBOMO16000	0.0214848148416058
1482	KWMTBOMO02516	KWMTBOMO03798	0.0467728483934124
1483	KWMTBOMO02516	KWMTBOMO09918	0.0218259200526115
1484	KWMTBOMO02516	KWMTBOMO00209	0.0488721420627655
1485	KWMTBOMO02516	KWMTBOMO12107	0.0263766015472329
1486	KWMTBOMO02516	KWMTBOMO00712	0.0333822206131019
1487	KWMTBOMO02516	KWMTBOMO05252	0.0373016842558114
1488	KWMTBOMO02516	KWMTBOMO12106	0.0498168176852578
1489	KWMTBOMO02516	KWMTBOMO03306	0.0234013631786191
1490	KWMTBOMO02516	KWMTBOMO09811	0.0265450437604257
1491	KWMTBOMO02516	KWMTBOMO14191	0.0357431161429732
1492	KWMTBOMO02516	KWMTBOMO06248	0.0289482020794977
1493	KWMTBOMO02516	KWMTBOMO12566	0.0235674456398494
1494	KWMTBOMO02516	KWMTBOMO09282	0.0360981493966255
1495	KWMTBOMO02516	KWMTBOMO15679	0.0354824414298208
1496	KWMTBOMO02516	KWMTBOMO00392	0.0290810489609344
1497	KWMTBOMO02516	KWMTBOMO13780	0.0275026924785513
1498	KWMTBOMO02516	KWMTBOMO08402	0.0389647945060443
1499	KWMTBOMO02516	KWMTBOMO07562	0.0228150000462028
1500	KWMTBOMO02516	KWMTBOMO14055	0.0396700727508749
1501	KWMTBOMO02516	KWMTBOMO05428	0.0294648659262481
1502	KWMTBOMO02516	KWMTBOMO02276	0.0319095373645637
1503	KWMTBOMO02516	KWMTBOMO05526	0.0323882025847808
1504	KWMTBOMO02516	KWMTBOMO07119	0.0338729400107939
1505	KWMTBOMO02516	KWMTBOMO11763	0.0279844694356567
1506	KWMTBOMO02516	KWMTBOMO15240	0.0305839649527867
1507	KWMTBOMO02516	KWMTBOMO00425	0.0326984376694012
1508	KWMTBOMO02516	KWMTBOMO03177	0.0274016713447366
1509	KWMTBOMO02516	KWMTBOMO14658	0.0313118039827835
1510	KWMTBOMO02516	KWMTBOMO15979	0.0273656012712574
1511	KWMTBOMO02516	KWMTBOMO04029	0.0363719480842661
1512	KWMTBOMO02516	KWMTBOMO07128	0.0305940259349522
1513	KWMTBOMO02516	KWMTBOMO12617	0.0319453859827872
1514	KWMTBOMO02516	KWMTBOMO13235	0.0250708188819613
1515	KWMTBOMO02516	KWMTBOMO09810	0.0293591648794862
1516	KWMTBOMO02516	KWMTBOMO11872	0.0502674683588762
1517	KWMTBOMO02516	KWMTBOMO03861	0.0355580025883436
1518	KWMTBOMO02516	KWMTBOMO04788	0.0323004492216581
1519	KWMTBOMO02516	KWMTBOMO11113	0.026512310993623
1520	KWMTBOMO02516	KWMTBOMO16131	0.0219745435116473
1521	KWMTBOMO02516	KWMTBOMO08441	0.0449363771247
1522	KWMTBOMO02516	KWMTBOMO01341	0.0265879243024916
1523	KWMTBOMO02516	KWMTBOMO05744	0.0414451699202474
1524	KWMTBOMO02516	KWMTBOMO05421	0.0275310666066105
1525	KWMTBOMO02516	KWMTBOMO12523	0.0312148715672617
1526	KWMTBOMO02516	KWMTBOMO14878	0.036815915822152
1527	KWMTBOMO02516	KWMTBOMO10545	0.0591384879930426
1528	KWMTBOMO02516	KWMTBOMO14269	0.029997775353566
1529	KWMTBOMO02516	KWMTBOMO14042	0.0337773452486318
1530	KWMTBOMO02516	KWMTBOMO05741	0.0180551726739198
1531	KWMTBOMO02516	KWMTBOMO02645	0.0306542460617162
1532	KWMTBOMO02516	KWMTBOMO07373	0.0300972681346279
1533	KWMTBOMO02516	KWMTBOMO10131	0.0404257519307366
1534	KWMTBOMO02516	KWMTBOMO06110	0.031668296039098
1535	KWMTBOMO02516	KWMTBOMO06501	0.026396460702569
1536	KWMTBOMO02516	KWMTBOMO11605	0.0302751676821858
1537	KWMTBOMO02516	KWMTBOMO06316	0.0255956507427436
1538	KWMTBOMO02516	KWMTBOMO09287	0.0327284452881551
1539	KWMTBOMO02516	KWMTBOMO12305	0.0226441926507984
1540	KWMTBOMO02516	KWMTBOMO14077	0.0495348006682114
1541	KWMTBOMO02516	KWMTBOMO16135	0.042965519522785
1542	KWMTBOMO02516	KWMTBOMO15946	0.0208986510713671
1543	KWMTBOMO02516	KWMTBOMO07201	0.0306454854312962
1544	KWMTBOMO02516	KWMTBOMO13315	0.0210068707948155
1545	KWMTBOMO02516	KWMTBOMO08144	0.023178005122375
1546	KWMTBOMO02516	KWMTBOMO13787	0.0301261225393081
1547	KWMTBOMO02516	KWMTBOMO10453	0.0432062526037918
1548	KWMTBOMO02516	KWMTBOMO00525	0.0337301331163893
1549	KWMTBOMO02516	KWMTBOMO12187	0.0398215332906975
1550	KWMTBOMO02516	KWMTBOMO06209	0.0221941149330737
1551	KWMTBOMO02516	KWMTBOMO05924	0.0333420333311239
1552	KWMTBOMO02516	KWMTBOMO04480	0.02529753659332
1553	KWMTBOMO02516	KWMTBOMO14742	0.0308618547879887
1554	KWMTBOMO02516	KWMTBOMO14272	0.0326359459304593
1555	KWMTBOMO02516	KWMTBOMO08906	0.0342232318529156
1556	KWMTBOMO02516	KWMTBOMO03862	0.0397458444366184
1557	KWMTBOMO02516	KWMTBOMO07642	0.0263996039705548
1558	KWMTBOMO02516	KWMTBOMO10133	0.0413230683025314
1559	KWMTBOMO02516	KWMTBOMO11805	0.0474116384371138
1560	KWMTBOMO02516	KWMTBOMO15710	0.0234413790367618
1561	KWMTBOMO02516	KWMTBOMO12629	0.0244489083768358
1562	KWMTBOMO02516	KWMTBOMO02843	0.0217830990282389
1563	KWMTBOMO02516	KWMTBOMO05357	0.0444615564785348
1564	KWMTBOMO02516	KWMTBOMO01751	0.0203680754141385
1565	KWMTBOMO02516	KWMTBOMO05725	0.024741870468013
1566	KWMTBOMO02516	KWMTBOMO06330	0.0191007735352876
1567	KWMTBOMO02516	KWMTBOMO05111	0.0323669425622303
1568	KWMTBOMO02516	KWMTBOMO08448	0.0228355441463202
1569	KWMTBOMO02516	KWMTBOMO00211	0.0324521859712114
1570	KWMTBOMO02516	KWMTBOMO08367	0.0317708950242754
1571	KWMTBOMO02516	KWMTBOMO04924	0.0382311923136501
1572	KWMTBOMO02516	KWMTBOMO03279	0.0302856779915586
1573	KWMTBOMO02516	KWMTBOMO14454	0.0321378691181558
1574	KWMTBOMO02516	KWMTBOMO01241	0.0369765646412921
1575	KWMTBOMO02516	KWMTBOMO14164	0.0297460647307717
1576	KWMTBOMO02516	KWMTBOMO00535	0.0179095213635485
1577	KWMTBOMO02516	KWMTBOMO13832	0.0390876965518441
1578	KWMTBOMO02516	KWMTBOMO01708	0.0310844504957843
1579	KWMTBOMO02516	KWMTBOMO00640	0.0331015878230194
1580	KWMTBOMO02516	KWMTBOMO09535	0.065514852760171
1581	KWMTBOMO02516	KWMTBOMO07220	0.0304758256417
1582	KWMTBOMO02516	KWMTBOMO09747	0.02132879969141
1583	KWMTBOMO02516	KWMTBOMO11806	0.0323978924155332
1584	KWMTBOMO02516	KWMTBOMO05364	0.0453187216384359
1585	KWMTBOMO02516	KWMTBOMO14773	0.0314166749134036
1586	KWMTBOMO02516	KWMTBOMO07114	0.0256095248266284
1587	KWMTBOMO02516	KWMTBOMO08918	0.0277911536216045
1588	KWMTBOMO02516	KWMTBOMO11015	0.0332234717451073
1589	KWMTBOMO02516	KWMTBOMO16176	0.0406792002904403
1590	KWMTBOMO02516	KWMTBOMO11870	0.0364407906419551
1591	KWMTBOMO02516	KWMTBOMO12725	0.0286597881226628
1592	KWMTBOMO02516	KWMTBOMO14282	0.0307280808316783
1593	KWMTBOMO02516	KWMTBOMO10176	0.0325305923409982
1594	KWMTBOMO02516	KWMTBOMO14625	0.0282768200611403
1595	KWMTBOMO02516	KWMTBOMO05631	0.0207625017728482
1596	KWMTBOMO02516	KWMTBOMO06458	0.0297554193997295
1597	KWMTBOMO02516	KWMTBOMO16301	0.035064420904703
1598	KWMTBOMO02516	KWMTBOMO04554	0.0339178238701931
1599	KWMTBOMO02516	KWMTBOMO14854	0.0342051308771501
1600	KWMTBOMO02516	KWMTBOMO06532	0.0446215331684976
1601	KWMTBOMO02516	KWMTBOMO15761	0.0412268412494478
1602	KWMTBOMO02516	KWMTBOMO05956	0.0233751079964059
1603	KWMTBOMO02516	KWMTBOMO05132	0.0418202054955955
1604	KWMTBOMO02516	KWMTBOMO13965	0.0315365657905668
1605	KWMTBOMO02516	KWMTBOMO12195	0.0282362594015824
1606	KWMTBOMO02516	KWMTBOMO08542	0.0328388554625537
1607	KWMTBOMO02516	KWMTBOMO02152	0.029868145386833
1608	KWMTBOMO02516	KWMTBOMO03836	0.0358048511952942
1609	KWMTBOMO02516	KWMTBOMO12192	0.0279859537303043
1610	KWMTBOMO02516	KWMTBOMO05739	0.024177831573493
1611	KWMTBOMO02516	KWMTBOMO04040	0.0325935702415699
1612	KWMTBOMO02516	KWMTBOMO12907	0.0242039722362163
1613	KWMTBOMO02516	KWMTBOMO02846	0.0392938044525886
1614	KWMTBOMO02516	KWMTBOMO14363	0.03071796145217
1615	KWMTBOMO02516	KWMTBOMO10518	0.0228242599278385
1616	KWMTBOMO02516	KWMTBOMO06460	0.0283850118593152
1617	KWMTBOMO02516	KWMTBOMO00989	0.0250966933077309
1618	KWMTBOMO02516	KWMTBOMO04778	0.0244985200693995
1619	KWMTBOMO02516	KWMTBOMO08196	0.0334233486657603
1620	KWMTBOMO02516	KWMTBOMO02625	0.0323877067567536
1621	KWMTBOMO02516	KWMTBOMO12165	0.031912063931683
1622	KWMTBOMO02516	KWMTBOMO09962	0.0391582385001548
1623	KWMTBOMO02516	KWMTBOMO08843	0.0197755087395922
1624	KWMTBOMO02516	KWMTBOMO01637	0.0330874865838049
1625	KWMTBOMO02516	KWMTBOMO11808	0.0326024385502177
1626	KWMTBOMO02516	KWMTBOMO09551	0.0373634203424534
1627	KWMTBOMO02516	KWMTBOMO10194	0.0259545797623705
1628	KWMTBOMO02516	KWMTBOMO08559	0.0379090940177038
1629	KWMTBOMO02516	KWMTBOMO07312	0.0292130438916769
1630	KWMTBOMO02516	KWMTBOMO05503	0.0279750520664462
1631	KWMTBOMO02516	KWMTBOMO11084	0.0280437827372027
1632	KWMTBOMO02516	KWMTBOMO15877	0.0272186514458293
1633	KWMTBOMO02516	KWMTBOMO05162	0.0294664239526204
1634	KWMTBOMO02516	KWMTBOMO03449	0.024663396506774
1635	KWMTBOMO02516	KWMTBOMO14036	0.0346424130102868
1636	KWMTBOMO02516	KWMTBOMO07948	0.0278109489559251
1637	KWMTBOMO02516	KWMTBOMO01709	0.0291571655030326
1638	KWMTBOMO02516	KWMTBOMO00883	0.0280679052010842
1639	KWMTBOMO02516	KWMTBOMO16437	0.0327854492572326
1640	KWMTBOMO02516	KWMTBOMO00501	0.0399850797050159
1641	KWMTBOMO02516	KWMTBOMO14418	0.0430395349504764
1642	KWMTBOMO02516	KWMTBOMO01821	0.026354439669196
1643	KWMTBOMO02516	KWMTBOMO06040	0.0223568498526102
1644	KWMTBOMO02516	KWMTBOMO09556	0.02623695984397
1645	KWMTBOMO02516	KWMTBOMO04567	0.0343747701169151
1646	KWMTBOMO02516	KWMTBOMO09492	0.0400159034474452
1647	KWMTBOMO02516	KWMTBOMO08364	0.0209133282724825
1648	KWMTBOMO02516	KWMTBOMO11867	0.0464095505604918
1649	KWMTBOMO02516	KWMTBOMO09043	0.0267511496150172
1650	KWMTBOMO02516	KWMTBOMO02904	0.0327287445821661
1651	KWMTBOMO02516	KWMTBOMO05175	0.023889021403793
1652	KWMTBOMO02516	KWMTBOMO04632	0.027822192196081
1653	KWMTBOMO02516	KWMTBOMO01718	0.0402519235465869
1654	KWMTBOMO02516	KWMTBOMO00591	0.0264623007004339
1655	KWMTBOMO02516	KWMTBOMO10243	0.0212611841577662
1656	KWMTBOMO02516	KWMTBOMO08584	0.0168001697301056
1657	KWMTBOMO02790	KWMTBOMO11648	0.0653799450120297
1658	KWMTBOMO02790	KWMTBOMO01851	0.0972051398696089
1659	KWMTBOMO02790	KWMTBOMO06532	0.0410751611847838
1660	KWMTBOMO02790	KWMTBOMO15679	0.051211903112768
1661	KWMTBOMO02790	KWMTBOMO01785	0.0567798928540409
1662	KWMTBOMO02790	KWMTBOMO14055	0.111912804089346
1663	KWMTBOMO02790	KWMTBOMO10284	0.0659695259023475
1664	KWMTBOMO02790	KWMTBOMO07373	0.068399867338054
1665	KWMTBOMO02790	KWMTBOMO06458	0.061909624016334
1666	KWMTBOMO02790	KWMTBOMO12559	0.0481249548151158
1667	KWMTBOMO02790	KWMTBOMO02152	0.0421932477325384
1668	KWMTBOMO02790	KWMTBOMO08339	0.0578268170076576
1669	KWMTBOMO02790	KWMTBOMO13228	0.126896140116143
1670	KWMTBOMO02790	KWMTBOMO10131	0.103142505099421
1671	KWMTBOMO02790	KWMTBOMO00209	0.0242196699692718
1672	KWMTBOMO02790	KWMTBOMO09492	0.0827138523449141
1673	KWMTBOMO02790	KWMTBOMO07652	0.10909540572855
1674	KWMTBOMO02790	KWMTBOMO04788	0.032088101065206
1675	KWMTBOMO02790	KWMTBOMO04480	0.0577505526829356
1676	KWMTBOMO02790	KWMTBOMO12629	0.0907780706016606
1677	KWMTBOMO02790	KWMTBOMO06330	0.0671100711861412
1678	KWMTBOMO02790	KWMTBOMO12523	0.0602836054405748
1679	KWMTBOMO02790	KWMTBOMO14077	0.0394104992035132
1680	KWMTBOMO02790	KWMTBOMO05056	0.138926766324309
1681	KWMTBOMO02790	KWMTBOMO14742	0.103533155471919
1682	KWMTBOMO02790	KWMTBOMO07128	0.0380903435627478
1683	KWMTBOMO02790	KWMTBOMO15485	0.0701916022213945
1684	KWMTBOMO02790	KWMTBOMO08400	0.0504941053387478
1685	KWMTBOMO02790	KWMTBOMO08448	0.035882069703096
1686	KWMTBOMO02790	KWMTBOMO04667	0.0469182000329053
1687	KWMTBOMO02790	KWMTBOMO05194	0.0738466075117682
1688	KWMTBOMO02790	KWMTBOMO08695	0.0495527583184938
1689	KWMTBOMO02790	KWMTBOMO05744	0.0547492639049645
1690	KWMTBOMO02790	KWMTBOMO02846	0.0550412698957755
1691	KWMTBOMO02790	KWMTBOMO07919	0.0229055724763607
1692	KWMTBOMO02790	KWMTBOMO14960	0.0555926729199083
1693	KWMTBOMO02790	KWMTBOMO15992	0.0696131745816998
1694	KWMTBOMO02790	KWMTBOMO06209	0.0577018198098353
1695	KWMTBOMO02790	KWMTBOMO01718	0.103887430459718
1696	KWMTBOMO02790	KWMTBOMO11649	0.0437112130224446
1697	KWMTBOMO02790	KWMTBOMO13832	0.11239434321593
1698	KWMTBOMO02790	KWMTBOMO15979	0.0919426895716731
1699	KWMTBOMO02790	KWMTBOMO01637	0.0973768480995697
1700	KWMTBOMO02790	KWMTBOMO01707	0.0895354025474017
1701	KWMTBOMO02790	KWMTBOMO10958	0.0846807522354454
1702	KWMTBOMO02790	KWMTBOMO04924	0.0370708685044902
1703	KWMTBOMO02790	KWMTBOMO09119	0.0755977066565017
1704	KWMTBOMO02790	KWMTBOMO10243	0.0911180407544846
1705	KWMTBOMO02790	KWMTBOMO08670	0.0885236329281399
1706	KWMTBOMO02790	KWMTBOMO11084	0.0701495282911027
1707	KWMTBOMO02790	KWMTBOMO05725	0.0580725118601679
1708	KWMTBOMO02790	KWMTBOMO15709	0.069863178071923
1709	KWMTBOMO02790	KWMTBOMO09551	0.0365004870253495
1710	KWMTBOMO02790	KWMTBOMO06531	0.0505203574905684
1711	KWMTBOMO02790	KWMTBOMO05631	0.109525700384524
1712	KWMTBOMO02790	KWMTBOMO07220	0.0752430977050713
1713	KWMTBOMO02790	KWMTBOMO15098	0.0784097249819036
1714	KWMTBOMO02790	KWMTBOMO11693	0.0590931294587287
1715	KWMTBOMO02790	KWMTBOMO07114	0.06007829611388
1716	KWMTBOMO02790	KWMTBOMO00167	0.0947577540149392
1717	KWMTBOMO02790	KWMTBOMO09556	0.0330862557294727
1718	KWMTBOMO02790	KWMTBOMO06460	0.0789861206397357
1719	KWMTBOMO02790	KWMTBOMO01003	0.0628459396704557
1720	KWMTBOMO02790	KWMTBOMO06110	0.0294620800869943
1721	KWMTBOMO02790	KWMTBOMO11015	0.0595857073287164
1722	KWMTBOMO02790	KWMTBOMO08868	0.143521436200971
1723	KWMTBOMO02790	KWMTBOMO00525	0.0571780337239796
1724	KWMTBOMO02790	KWMTBOMO03122	0.0530582684436004
1725	KWMTBOMO02790	KWMTBOMO09282	0.0639953311698361
1726	KWMTBOMO02790	KWMTBOMO06100	0.0813823474829788
1727	KWMTBOMO02790	KWMTBOMO05428	0.121103319911088
1728	KWMTBOMO02790	KWMTBOMO09683	0.0599579120621071
1729	KWMTBOMO02790	KWMTBOMO00883	0.118407049537267
1730	KWMTBOMO02790	KWMTBOMO14164	0.0590860511732743
1731	KWMTBOMO02790	KWMTBOMO02211	0.068956061624321
1732	KWMTBOMO02790	KWMTBOMO09962	0.0621722539531534
1733	KWMTBOMO02790	KWMTBOMO07107	0.0306498684873822
1734	KWMTBOMO02790	KWMTBOMO09811	0.138598981554557
1735	KWMTBOMO02790	KWMTBOMO10133	0.0584717702871051
1736	KWMTBOMO02790	KWMTBOMO01518	0.0929675716395573
1737	KWMTBOMO02790	KWMTBOMO06542	0.0591257787945612
1738	KWMTBOMO02790	KWMTBOMO16135	0.0244353553928936
1739	KWMTBOMO02790	KWMTBOMO12192	0.110283081134984
1740	KWMTBOMO02790	KWMTBOMO14431	0.083148485454079
1741	KWMTBOMO02790	KWMTBOMO04815	0.0741361952001499
1742	KWMTBOMO02790	KWMTBOMO07119	0.0687650505408619
1743	KWMTBOMO02790	KWMTBOMO14272	0.0662431257367628
1744	KWMTBOMO02790	KWMTBOMO14658	0.127176066710274
1745	KWMTBOMO02790	KWMTBOMO11805	0.0731886751857743
1746	KWMTBOMO02790	KWMTBOMO14076	0.0990348711182582
1747	KWMTBOMO02790	KWMTBOMO11972	0.0790311722547487
1748	KWMTBOMO02790	KWMTBOMO11868	0.0484342333535005
1749	KWMTBOMO02790	KWMTBOMO03450	0.0642087897381222
1750	KWMTBOMO02790	KWMTBOMO06159	0.0841212386303193
1751	KWMTBOMO02790	KWMTBOMO05175	0.0589876267713209
1752	KWMTBOMO02790	KWMTBOMO08330	0.0579884561507827
1753	KWMTBOMO02790	KWMTBOMO08828	0.0233212562991302
1754	KWMTBOMO02790	KWMTBOMO05674	0.0506703745356047
1755	KWMTBOMO02790	KWMTBOMO03302	0.133114028862191
1756	KWMTBOMO02790	KWMTBOMO01341	0.169193844655604
1757	KWMTBOMO02790	KWMTBOMO10488	0.0595365555646219
1758	KWMTBOMO02790	KWMTBOMO02843	0.176530576439985
1759	KWMTBOMO02790	KWMTBOMO00501	0.0353455166366727
1760	KWMTBOMO02790	KWMTBOMO09535	0.0391320184800729
1761	KWMTBOMO02790	KWMTBOMO14042	0.0458330297813753
1762	KWMTBOMO02790	KWMTBOMO12970	0.0602005794697904
1763	KWMTBOMO02790	KWMTBOMO00988	0.0858755749090746
1764	KWMTBOMO02790	KWMTBOMO05111	0.0926982902139224
1765	KWMTBOMO02790	KWMTBOMO13780	0.150758182991586
1766	KWMTBOMO02790	KWMTBOMO03798	0.0411222770632247
1767	KWMTBOMO02790	KWMTBOMO06316	0.0895824885904282
1768	KWMTBOMO02790	KWMTBOMO03433	0.0531015278574958
1769	KWMTBOMO02790	KWMTBOMO12305	0.0535384147230628
1770	KWMTBOMO02790	KWMTBOMO09918	0.0493354582088379
1771	KWMTBOMO02790	KWMTBOMO04937	0.0745886284556993
1772	KWMTBOMO02790	KWMTBOMO09124	0.0839798628658487
1773	KWMTBOMO02790	KWMTBOMO08981	0.106876579754681
1774	KWMTBOMO02790	KWMTBOMO13315	0.0625855129846084
1775	KWMTBOMO02790	KWMTBOMO00621	0.0720296531143446
1776	KWMTBOMO02790	KWMTBOMO05357	0.0647211263621106
1777	KWMTBOMO02790	KWMTBOMO04325	0.0717582213456332
1778	KWMTBOMO02790	KWMTBOMO11870	0.0828200431593489
1779	KWMTBOMO02790	KWMTBOMO15336	0.093168906597742
1780	KWMTBOMO02790	KWMTBOMO09408	0.0466789903491567
1781	KWMTBOMO02790	KWMTBOMO06248	0.0785678205353891
1782	KWMTBOMO02790	KWMTBOMO00211	0.0619366911496972
1783	KWMTBOMO02790	KWMTBOMO02993	0.0748303046914823
1784	KWMTBOMO02790	KWMTBOMO05741	0.130046549762504
1785	KWMTBOMO02790	KWMTBOMO00640	0.0749732575819617
1786	KWMTBOMO02790	KWMTBOMO09043	0.0888610631182054
1787	KWMTBOMO02790	KWMTBOMO12725	0.0983938063863847
1788	KWMTBOMO02790	KWMTBOMO11763	0.0480394491121183
1789	KWMTBOMO02790	KWMTBOMO08196	0.088154784244393
1790	KWMTBOMO02790	KWMTBOMO14476	0.0582920925946818
1791	KWMTBOMO02790	KWMTBOMO04029	0.0376778981025033
1792	KWMTBOMO02790	KWMTBOMO11806	0.0545023738805235
1793	KWMTBOMO02790	KWMTBOMO15877	0.0512236614238808
1794	KWMTBOMO02790	KWMTBOMO03385	0.141292058252371
1795	KWMTBOMO02790	KWMTBOMO08145	0.0703104867012998
1796	KWMTBOMO02790	KWMTBOMO07201	0.0975259569127734
1797	KWMTBOMO02790	KWMTBOMO08843	0.0301004833036687
1798	KWMTBOMO02790	KWMTBOMO15761	0.122740442685874
1799	KWMTBOMO02790	KWMTBOMO13368	0.134308755357405
1800	KWMTBOMO02790	KWMTBOMO07312	0.0920034618950062
1801	KWMTBOMO02790	KWMTBOMO05427	0.0824119388809717
1802	KWMTBOMO02790	KWMTBOMO12187	0.0328314517211904
1803	KWMTBOMO02790	KWMTBOMO11605	0.046421277792708
1804	KWMTBOMO02790	KWMTBOMO04040	0.0817783020401867
1805	KWMTBOMO02790	KWMTBOMO07516	0.174127047403637
1806	KWMTBOMO02790	KWMTBOMO00712	0.123842446622963
1807	KWMTBOMO02790	KWMTBOMO04778	0.0475086188240247
1808	KWMTBOMO02790	KWMTBOMO05924	0.0727368970813651
1809	KWMTBOMO02790	KWMTBOMO15710	0.0726154124698837
1810	KWMTBOMO02790	KWMTBOMO03177	0.13561131868262
1811	KWMTBOMO02790	KWMTBOMO03862	0.0688476277575582
1812	KWMTBOMO02790	KWMTBOMO10453	0.115007890143083
1813	KWMTBOMO02790	KWMTBOMO02165	0.142735677551607
1814	KWMTBOMO02790	KWMTBOMO12907	0.0874516944400383
1815	KWMTBOMO02790	KWMTBOMO03346	0.0797185754647221
1816	KWMTBOMO02790	KWMTBOMO04632	0.0551189876974193
1817	KWMTBOMO02790	KWMTBOMO05503	0.0556282940631949
1818	KWMTBOMO02790	KWMTBOMO09287	0.0770381928596911
1819	KWMTBOMO02790	KWMTBOMO08584	0.130672730411966
1820	KWMTBOMO02790	KWMTBOMO05526	0.102321157215033
1821	KWMTBOMO02790	KWMTBOMO09528	0.0706541768178824
1822	KWMTBOMO02790	KWMTBOMO08402	0.0465506624479786
1823	KWMTBOMO02790	KWMTBOMO01821	0.0594138605843531
1824	KWMTBOMO02790	KWMTBOMO06166	0.0245921074082688
1825	KWMTBOMO02790	KWMTBOMO10545	0.0498711637734368
1826	KWMTBOMO02790	KWMTBOMO16000	0.0663962446283192
1827	KWMTBOMO02790	KWMTBOMO12434	0.0865890479223087
1828	KWMTBOMO02790	KWMTBOMO11188	0.0871697228225297
1829	KWMTBOMO02790	KWMTBOMO12107	0.099881458143286
1830	KWMTBOMO02790	KWMTBOMO14454	0.0922265890007777
1831	KWMTBOMO02790	KWMTBOMO10322	0.0815691983043583
1832	KWMTBOMO02790	KWMTBOMO08559	0.0489665546696546
1833	KWMTBOMO02790	KWMTBOMO10194	0.0938899902975518
1834	KWMTBOMO02790	KWMTBOMO00591	0.0770309780121758
1835	KWMTBOMO02790	KWMTBOMO02904	0.103293923925923
1836	KWMTBOMO02790	KWMTBOMO09810	0.0826788532028374
1837	KWMTBOMO02790	KWMTBOMO14878	0.0764458068629582
1838	KWMTBOMO02790	KWMTBOMO16131	0.0468785534076247
1839	KWMTBOMO02790	KWMTBOMO00989	0.113342316072106
1840	KWMTBOMO02790	KWMTBOMO05252	0.0718503793082219
1841	KWMTBOMO02790	KWMTBOMO14036	0.0769985180333926
1842	KWMTBOMO02790	KWMTBOMO06501	0.0365974276492912
1843	KWMTBOMO02790	KWMTBOMO08144	0.0500135318861619
1844	KWMTBOMO02790	KWMTBOMO15980	0.0732930944365104
1845	KWMTBOMO02790	KWMTBOMO08441	0.118122921520663
1846	KWMTBOMO02790	KWMTBOMO00982	0.0794950235345864
1847	KWMTBOMO02790	KWMTBOMO14269	0.0537698411167898
1848	KWMTBOMO02790	KWMTBOMO14282	0.141326051777298
1849	KWMTBOMO02790	KWMTBOMO03279	0.0722791321754374
1850	KWMTBOMO02790	KWMTBOMO11867	0.0825743381880622
1851	KWMTBOMO02790	KWMTBOMO07642	0.0507056947875682
1852	KWMTBOMO02790	KWMTBOMO05739	0.192541592795953
1853	KWMTBOMO02790	KWMTBOMO13235	0.077975622259499
1854	KWMTBOMO02790	KWMTBOMO13965	0.0379519670159796
1855	KWMTBOMO02790	KWMTBOMO03306	0.152396242240116
1856	KWMTBOMO02790	KWMTBOMO11872	0.0545933314581711
1857	KWMTBOMO02790	KWMTBOMO08667	0.0378039253042901
1858	KWMTBOMO02790	KWMTBOMO11442	0.0635748561388695
1859	KWMTBOMO02790	KWMTBOMO15240	0.0500443372812809
1860	KWMTBOMO02790	KWMTBOMO14465	0.0659931812893482
1861	KWMTBOMO02790	KWMTBOMO11808	0.0276455884478513
1862	KWMTBOMO02790	KWMTBOMO08302	0.0934736623463174
1863	KWMTBOMO02790	KWMTBOMO07374	0.104163086999309
1864	KWMTBOMO02790	KWMTBOMO12566	0.0548127200482737
1865	KWMTBOMO02790	KWMTBOMO01287	0.0498187672044632
1866	KWMTBOMO02790	KWMTBOMO08906	0.0668590127753077
1867	KWMTBOMO02790	KWMTBOMO14191	0.0614953671177257
1868	KWMTBOMO02790	KWMTBOMO15648	0.0564335489719839
1869	KWMTBOMO02790	KWMTBOMO05629	0.0489182704381735
1870	KWMTBOMO02790	KWMTBOMO01862	0.0628854855572719
1871	KWMTBOMO02790	KWMTBOMO14625	0.0693427145078292
1872	KWMTBOMO02790	KWMTBOMO12479	0.0773412427425989
1873	KWMTBOMO02790	KWMTBOMO14773	0.0890787835947877
1874	KWMTBOMO02790	KWMTBOMO01563	0.0755823354548823
1875	KWMTBOMO02790	KWMTBOMO15946	0.0986831460638383
1876	KWMTBOMO02790	KWMTBOMO12165	0.0704844290120294
1877	KWMTBOMO02790	KWMTBOMO01751	0.0516867413886937
1878	KWMTBOMO02790	KWMTBOMO01708	0.0793851670487422
1879	KWMTBOMO02790	KWMTBOMO01709	0.0520542360574322
1880	KWMTBOMO02790	KWMTBOMO08542	0.0780859662085523
1881	KWMTBOMO02790	KWMTBOMO07948	0.0485943383002208
1882	KWMTBOMO02790	KWMTBOMO13787	0.117167117226132
1883	KWMTBOMO02790	KWMTBOMO02991	0.0543180390975875
1884	KWMTBOMO02790	KWMTBOMO11113	0.0776678157326176
1885	KWMTBOMO02790	KWMTBOMO10397	0.0365483643660902
1886	KWMTBOMO02790	KWMTBOMO08740	0.0747804497312034
1887	KWMTBOMO02790	KWMTBOMO13318	0.0940713623061687
1888	KWMTBOMO02790	KWMTBOMO03836	0.0686036444285611
1889	KWMTBOMO02790	KWMTBOMO10518	0.0806925392899324
1890	KWMTBOMO02790	KWMTBOMO12106	0.0692902171746394
1891	KWMTBOMO02790	KWMTBOMO05132	0.0383110986993164
1892	KWMTBOMO02790	KWMTBOMO03449	0.0636079448777528
1893	KWMTBOMO02790	KWMTBOMO00392	0.135846251408293
1894	KWMTBOMO02790	KWMTBOMO00539	0.117974415247091
1895	KWMTBOMO02790	KWMTBOMO09747	0.0700244567880638
1896	KWMTBOMO02790	KWMTBOMO03861	0.0858902795258387
1897	KWMTBOMO02790	KWMTBOMO05242	0.0407233454591216
1898	KWMTBOMO02790	KWMTBOMO02645	0.0721114088385559
1899	KWMTBOMO02790	KWMTBOMO05372	0.102430929171846
1900	KWMTBOMO02790	KWMTBOMO06217	0.0547888233352143
1901	KWMTBOMO02790	KWMTBOMO04554	0.0770676326762773
1902	KWMTBOMO02790	KWMTBOMO05364	0.070093190063852
1903	KWMTBOMO02790	KWMTBOMO15947	0.0605064774811178
1904	KWMTBOMO02790	KWMTBOMO00535	0.143325238907827
1905	KWMTBOMO02790	KWMTBOMO06040	0.0691521437616413
1906	KWMTBOMO02790	KWMTBOMO05421	0.0510683945917478
1907	KWMTBOMO02790	KWMTBOMO09357	0.0285686087631806
1908	KWMTBOMO02790	KWMTBOMO01662	0.0825943392247714
1909	KWMTBOMO02790	KWMTBOMO07562	0.0559259210277823
1910	KWMTBOMO02790	KWMTBOMO14462	0.0666872429315835
1911	KWMTBOMO02790	KWMTBOMO01241	0.0485493890229869
1912	KWMTBOMO02790	KWMTBOMO00157	0.11661710386707
1913	KWMTBOMO02790	KWMTBOMO14363	0.0624721898422447
1914	KWMTBOMO02790	KWMTBOMO08367	0.0676967885418638
1915	KWMTBOMO02790	KWMTBOMO02625	0.0656748864932097
1916	KWMTBOMO02790	KWMTBOMO16437	0.0614684561404056
1917	KWMTBOMO02790	KWMTBOMO12195	0.0538901106027095
1918	KWMTBOMO02790	KWMTBOMO10176	0.104122134466287
1919	KWMTBOMO02790	KWMTBOMO00425	0.0535998339594215
1920	KWMTBOMO02790	KWMTBOMO04567	0.0799803411454057
1921	KWMTBOMO02790	KWMTBOMO08364	0.0898125590077191
1922	KWMTBOMO02790	KWMTBOMO14418	0.0579890448365497
1923	KWMTBOMO02790	KWMTBOMO12486	0.108069007779526
1924	KWMTBOMO02790	KWMTBOMO16176	0.083759683266774
1925	KWMTBOMO02790	KWMTBOMO05162	0.0868532217854594
1926	KWMTBOMO02790	KWMTBOMO02276	0.0861919652679135
1927	KWMTBOMO02790	KWMTBOMO08918	0.0635744308550174
1928	KWMTBOMO02790	KWMTBOMO14854	0.0487252450170255
1929	KWMTBOMO02790	KWMTBOMO12920	0.0490758250186838
1930	KWMTBOMO02790	KWMTBOMO12617	0.0937781764027293
1931	KWMTBOMO02790	KWMTBOMO16301	0.0215181597806076
1932	KWMTBOMO02790	KWMTBOMO05956	0.119180899837471
1933	KWMTBOMO02820	KWMTBOMO08695	0.0394298239949134
1934	KWMTBOMO02820	KWMTBOMO05252	0.0241192558259944
1935	KWMTBOMO02820	KWMTBOMO08196	0.0217167649389726
1936	KWMTBOMO02820	KWMTBOMO09683	0.0220363589631052
1937	KWMTBOMO02820	KWMTBOMO04924	0.0265857887784784
1938	KWMTBOMO02820	KWMTBOMO15980	0.0210546473852788
1939	KWMTBOMO02820	KWMTBOMO08868	0.0135430017197673
1940	KWMTBOMO02820	KWMTBOMO07562	0.0314951187391399
1941	KWMTBOMO02820	KWMTBOMO14462	0.0247651975044478
1942	KWMTBOMO02820	KWMTBOMO14076	0.0238031445101359
1943	KWMTBOMO02820	KWMTBOMO14960	0.0310599745086261
1944	KWMTBOMO02820	KWMTBOMO10545	0.0353659132094979
1945	KWMTBOMO02820	KWMTBOMO12486	0.0214772000492931
1946	KWMTBOMO02820	KWMTBOMO00640	0.025898654518823
1947	KWMTBOMO02820	KWMTBOMO12920	0.0282033878328833
1948	KWMTBOMO02820	KWMTBOMO01821	0.0270995585850705
1949	KWMTBOMO02820	KWMTBOMO08667	0.0254486398001899
1950	KWMTBOMO02820	KWMTBOMO08144	0.0327449821601318
1951	KWMTBOMO02820	KWMTBOMO04667	0.0313931819846819
1952	KWMTBOMO02820	KWMTBOMO05357	0.0226697314141453
1953	KWMTBOMO02820	KWMTBOMO13318	0.0238999152734565
1954	KWMTBOMO02820	KWMTBOMO05056	0.0204687530075745
1955	KWMTBOMO02820	KWMTBOMO15947	0.0250272201876393
1956	KWMTBOMO02820	KWMTBOMO03302	0.0201996213425458
1957	KWMTBOMO02820	KWMTBOMO10176	0.0161758922645844
1958	KWMTBOMO02820	KWMTBOMO03279	0.0307069651104726
1959	KWMTBOMO02820	KWMTBOMO08542	0.0226146975263802
1960	KWMTBOMO02820	KWMTBOMO01563	0.0235958371413651
1961	KWMTBOMO02820	KWMTBOMO10518	0.0229730880244334
1962	KWMTBOMO02820	KWMTBOMO03450	0.0235256699698987
1963	KWMTBOMO02820	KWMTBOMO00157	0.0164550019832614
1964	KWMTBOMO02820	KWMTBOMO13832	0.0208156198366446
1965	KWMTBOMO02820	KWMTBOMO04040	0.0284723571408631
1966	KWMTBOMO02820	KWMTBOMO11763	0.0255061830656379
1967	KWMTBOMO02820	KWMTBOMO11188	0.0244624700514755
1968	KWMTBOMO02820	KWMTBOMO06532	0.0447717449826472
1969	KWMTBOMO02820	KWMTBOMO01662	0.0270749428714729
1970	KWMTBOMO02820	KWMTBOMO02843	0.012244111952021
1971	KWMTBOMO02820	KWMTBOMO05631	0.0176009949009086
1972	KWMTBOMO02820	KWMTBOMO06458	0.0348249979112626
1973	KWMTBOMO02820	KWMTBOMO08448	0.0324404914327683
1974	KWMTBOMO02820	KWMTBOMO03177	0.014225584119592
1975	KWMTBOMO02820	KWMTBOMO12106	0.0196345069803174
1976	KWMTBOMO02820	KWMTBOMO03433	0.0302707609921284
1977	KWMTBOMO02820	KWMTBOMO02993	0.0332119623377495
1978	KWMTBOMO02820	KWMTBOMO09119	0.0297048317981466
1979	KWMTBOMO02820	KWMTBOMO10131	0.0194790593624321
1980	KWMTBOMO02820	KWMTBOMO02276	0.0200435927127349
1981	KWMTBOMO02820	KWMTBOMO15098	0.0255904690853333
1982	KWMTBOMO02820	KWMTBOMO14454	0.0246508637238178
1983	KWMTBOMO02820	KWMTBOMO08400	0.0320552406445367
1984	KWMTBOMO02820	KWMTBOMO12559	0.0300603854971694
1985	KWMTBOMO02820	KWMTBOMO07114	0.0242868744260729
1986	KWMTBOMO02820	KWMTBOMO00883	0.0157705823760407
1987	KWMTBOMO02820	KWMTBOMO11605	0.0284654268055729
1988	KWMTBOMO02820	KWMTBOMO14742	0.0221042844720627
1989	KWMTBOMO02820	KWMTBOMO05629	0.0362303521081001
1990	KWMTBOMO02820	KWMTBOMO16301	0.044798438649127
1991	KWMTBOMO02820	KWMTBOMO16437	0.0216938401715076
1992	KWMTBOMO02820	KWMTBOMO01287	0.0440494147117791
1993	KWMTBOMO02820	KWMTBOMO11649	0.0487716904131129
1994	KWMTBOMO02820	KWMTBOMO00989	0.018388507760463
1995	KWMTBOMO02820	KWMTBOMO12907	0.017936428743199
1996	KWMTBOMO02820	KWMTBOMO16131	0.0203274521158501
1997	KWMTBOMO02820	KWMTBOMO11806	0.0265145553605672
1998	KWMTBOMO02820	KWMTBOMO09282	0.0235329358548666
1999	KWMTBOMO02820	KWMTBOMO05428	0.0179890132924879
[truncated: 7,109 more rows]

## Sheet: 3-module 10
	regulatoryGene	targetGene	weight
1	KWMTBOMO02748	KWMTBOMO00375	0.74133576273292
2	KWMTBOMO02748	KWMTBOMO13254	0.813940927000107
3	KWMTBOMO02748	KWMTBOMO00390	0.917724781769192
4	KWMTBOMO02748	KWMTBOMO13262	0.791817362326138
5	KWMTBOMO02748	KWMTBOMO04868	0.65332421212083
6	KWMTBOMO02748	KWMTBOMO00788	0.687014177264492
7	KWMTBOMO02748	KWMTBOMO00922	0.88336680061204
8	KWMTBOMO02748	KWMTBOMO08652	0.807989705871473
9	KWMTBOMO02748	KWMTBOMO00971	0.779711855875161
10	KWMTBOMO02748	KWMTBOMO05784	0.653431170417007
11	KWMTBOMO02748	KWMTBOMO09544	0.878219048397133
12	KWMTBOMO02748	KWMTBOMO01883	0.614202422864964
13	KWMTBOMO02748	KWMTBOMO06121	0.651117777321252
14	KWMTBOMO02748	KWMTBOMO01927	0.828606290471261
15	KWMTBOMO02748	KWMTBOMO02082	0.575630070223604
16	KWMTBOMO02748	KWMTBOMO15985	0.727539975706077
17	KWMTBOMO02748	KWMTBOMO02352	0.747633300083437
18	KWMTBOMO02748	KWMTBOMO06216	0.897157291712916
19	KWMTBOMO02748	KWMTBOMO06427	0.88825696970648
20	KWMTBOMO02748	KWMTBOMO02599	0.725013730279436
21	KWMTBOMO02748	KWMTBOMO06524	0.897474742504419
22	KWMTBOMO02748	KWMTBOMO02944	0.681056165610824
23	KWMTBOMO02748	KWMTBOMO03035	0.840410215699803
24	KWMTBOMO02748	KWMTBOMO04344	0.831303158318029
25	KWMTBOMO02748	KWMTBOMO11316	0.806783029757546
26	KWMTBOMO02748	KWMTBOMO03204	0.741938035952723
27	KWMTBOMO02748	KWMTBOMO06763	0.861124576830241
28	KWMTBOMO02748	KWMTBOMO03422	0.883681837734215
29	KWMTBOMO02748	KWMTBOMO06183	0.8039507310828
30	KWMTBOMO02748	KWMTBOMO03463	0.677578246709154
31	KWMTBOMO02748	KWMTBOMO11453	0.444550730103907
32	KWMTBOMO02748	KWMTBOMO03537	0.743378670549352
33	KWMTBOMO02748	KWMTBOMO07621	0.538400305653907
34	KWMTBOMO02748	KWMTBOMO03539	0.661883394968854
35	KWMTBOMO02748	KWMTBOMO07715	0.767132221147608
36	KWMTBOMO02748	KWMTBOMO03753	0.776723270760541
37	KWMTBOMO02748	KWMTBOMO09342	0.660545478394325
38	KWMTBOMO02748	KWMTBOMO07874	0.767423408972348
39	KWMTBOMO02748	KWMTBOMO04529	0.742671005434678
40	KWMTBOMO02748	KWMTBOMO08318	0.626668075254536
41	KWMTBOMO02748	KWMTBOMO04541	0.580937690594786
42	KWMTBOMO02748	KWMTBOMO11395	0.749777778962242
43	KWMTBOMO02748	KWMTBOMO04594	0.651612260335491
44	KWMTBOMO02748	KWMTBOMO16146	0.826043166121974
45	KWMTBOMO02748	KWMTBOMO08538	0.730131446628306
46	KWMTBOMO02748	KWMTBOMO16422	0.866400808151886
47	KWMTBOMO02748	KWMTBOMO05683	0.675358728983858
48	KWMTBOMO02748	KWMTBOMO13553	0.916733846402295
49	KWMTBOMO02748	KWMTBOMO11198	0.734836868266768
50	KWMTBOMO02748	KWMTBOMO06535	0.736967721878608
51	KWMTBOMO02748	KWMTBOMO12585	0.885114009469316
52	KWMTBOMO02748	KWMTBOMO05967	0.715404446130353
53	KWMTBOMO02748	KWMTBOMO09705	0.697348820365288
54	KWMTBOMO02748	KWMTBOMO16141	0.888117682436221
55	KWMTBOMO02748	KWMTBOMO08319	0.714830489121459
56	KWMTBOMO02748	KWMTBOMO09832	0.865002842801451
57	KWMTBOMO02748	KWMTBOMO07589	0.769779068160904
58	KWMTBOMO02748	KWMTBOMO09892	0.772473092656994
59	KWMTBOMO02748	KWMTBOMO07600	0.765110026909003
60	KWMTBOMO02748	KWMTBOMO10746	0.780730493744366
61	KWMTBOMO02748	KWMTBOMO16456	0.854322183691534
62	KWMTBOMO02748	KWMTBOMO12229	0.688520332957107
63	KWMTBOMO02748	KWMTBOMO16119	0.576803233249759
64	KWMTBOMO02748	KWMTBOMO13599	0.635870012761473
65	KWMTBOMO02748	KWMTBOMO16139	0.860000600782952
66	KWMTBOMO02748	KWMTBOMO06607	0.592493471384849
67	KWMTBOMO02748	KWMTBOMO13858	0.820779391775402
68	KWMTBOMO02748	KWMTBOMO13471	0.733663833174965
69	KWMTBOMO02748	KWMTBOMO15816	0.875401921322376
70	KWMTBOMO02748	KWMTBOMO08464	0.395988757580259
71	KWMTBOMO02748	KWMTBOMO11418	0.818452894852629
72	KWMTBOMO02748	KWMTBOMO15198	0.824945839001347
73	KWMTBOMO02748	KWMTBOMO11817	0.712783472888982
74	KWMTBOMO02748	KWMTBOMO15179	0.638313346852356
75	KWMTBOMO02748	KWMTBOMO12895	0.881421531343624
76	KWMTBOMO02748	KWMTBOMO15407	0.703882209461316
77	KWMTBOMO02748	KWMTBOMO11295	0.699191473793816
78	KWMTBOMO02748	KWMTBOMO16600	0.582020096951105
79	KWMTBOMO02748	KWMTBOMO13957	0.696306307451821
80	KWMTBOMO02748	KWMTBOMO13619	0.369738432733937
81	KWMTBOMO02748	KWMTBOMO14179	0.598155372203167
82	KWMTBOMO02748	KWMTBOMO16144	0.85900255249899
83	KWMTBOMO02748	KWMTBOMO16115	0.793736495233224
84	KWMTBOMO02748	KWMTBOMO16106	0.736975060157402
85	KWMTBOMO02748	KWMTBOMO15365	0.594018
86	KWMTBOMO15340	KWMTBOMO02082	0.424369929776396
87	KWMTBOMO15340	KWMTBOMO00375	0.25866423726708
88	KWMTBOMO15340	KWMTBOMO03537	0.256621329450648
89	KWMTBOMO15340	KWMTBOMO03035	0.159589784300197
90	KWMTBOMO15340	KWMTBOMO01883	0.385797577135036
91	KWMTBOMO15340	KWMTBOMO05784	0.346568829582993
92	KWMTBOMO15340	KWMTBOMO00922	0.11663319938796
93	KWMTBOMO15340	KWMTBOMO06121	0.348882222678748
94	KWMTBOMO15340	KWMTBOMO09705	0.302651179634712
95	KWMTBOMO15340	KWMTBOMO06183	0.1960492689172
96	KWMTBOMO15340	KWMTBOMO06216	0.102842708287084
97	KWMTBOMO15340	KWMTBOMO00390	0.0822752182308074
98	KWMTBOMO15340	KWMTBOMO02599	0.274986269720564
99	KWMTBOMO15340	KWMTBOMO04868	0.34667578787917
100	KWMTBOMO15340	KWMTBOMO02944	0.318943834389176
101	KWMTBOMO15340	KWMTBOMO11198	0.265163131733232
102	KWMTBOMO15340	KWMTBOMO09342	0.339454521605675
103	KWMTBOMO15340	KWMTBOMO06535	0.263032278121392
104	KWMTBOMO15340	KWMTBOMO03204	0.258061964047277
105	KWMTBOMO15340	KWMTBOMO06607	0.407506528615151
106	KWMTBOMO15340	KWMTBOMO03422	0.116318162265785
107	KWMTBOMO15340	KWMTBOMO11395	0.250222221037758
108	KWMTBOMO15340	KWMTBOMO03463	0.322421753290846
109	KWMTBOMO15340	KWMTBOMO09832	0.134997157198549
110	KWMTBOMO15340	KWMTBOMO09892	0.227526907343006
111	KWMTBOMO15340	KWMTBOMO07600	0.234889973090997
112	KWMTBOMO15340	KWMTBOMO10746	0.219269506255634
113	KWMTBOMO15340	KWMTBOMO07621	0.461599694346093
114	KWMTBOMO15340	KWMTBOMO11817	0.287216527111018
115	KWMTBOMO15340	KWMTBOMO03753	0.223276729239459
116	KWMTBOMO15340	KWMTBOMO07715	0.232867778852392
117	KWMTBOMO15340	KWMTBOMO05967	0.284595553869647
118	KWMTBOMO15340	KWMTBOMO04344	0.168696841681971
119	KWMTBOMO15340	KWMTBOMO08318	0.373331924745464
120	KWMTBOMO15340	KWMTBOMO04529	0.257328994565322
121	KWMTBOMO15340	KWMTBOMO04541	0.419062309405214
122	KWMTBOMO15340	KWMTBOMO07589	0.230220931839096
123	KWMTBOMO15340	KWMTBOMO13262	0.208182637673862
124	KWMTBOMO15340	KWMTBOMO04594	0.348387739664509
125	KWMTBOMO15340	KWMTBOMO00788	0.312985822735508
126	KWMTBOMO15340	KWMTBOMO08538	0.269868553371694
127	KWMTBOMO15340	KWMTBOMO08652	0.192010294128527
128	KWMTBOMO15340	KWMTBOMO05683	0.324641271016142
129	KWMTBOMO15340	KWMTBOMO13599	0.364129987238527
130	KWMTBOMO15340	KWMTBOMO11295	0.300808526206184
131	KWMTBOMO15340	KWMTBOMO13619	0.630261567266063
132	KWMTBOMO15340	KWMTBOMO09544	0.121780951602867
133	KWMTBOMO15340	KWMTBOMO01927	0.171393709528739
134	KWMTBOMO15340	KWMTBOMO13858	0.179220608224598
135	KWMTBOMO15340	KWMTBOMO08319	0.285169510878541
136	KWMTBOMO15340	KWMTBOMO13957	0.303693692548179
137	KWMTBOMO15340	KWMTBOMO14179	0.401844627796833
138	KWMTBOMO15340	KWMTBOMO02352	0.252366699916563
139	KWMTBOMO15340	KWMTBOMO15179	0.361686653147644
140	KWMTBOMO15340	KWMTBOMO06427	0.11174303029352
141	KWMTBOMO15340	KWMTBOMO15198	0.175054160998653
142	KWMTBOMO15340	KWMTBOMO06524	0.102525257495581
143	KWMTBOMO15340	KWMTBOMO07874	0.232576591027652
144	KWMTBOMO15340	KWMTBOMO15365	0.405982
145	KWMTBOMO15340	KWMTBOMO15407	0.296117790538684
146	KWMTBOMO15340	KWMTBOMO11316	0.193216970242454
147	KWMTBOMO15340	KWMTBOMO15816	0.124598078677624
148	KWMTBOMO15340	KWMTBOMO06763	0.138875423169759
149	KWMTBOMO15340	KWMTBOMO11418	0.181547105147371
150	KWMTBOMO15340	KWMTBOMO15985	0.272460024293923
151	KWMTBOMO15340	KWMTBOMO16106	0.263024939842598
152	KWMTBOMO15340	KWMTBOMO11453	0.555449269896093
153	KWMTBOMO15340	KWMTBOMO03539	0.338116605031146
154	KWMTBOMO15340	KWMTBOMO16115	0.206263504766776
155	KWMTBOMO15340	KWMTBOMO16119	0.423196766750241
156	KWMTBOMO15340	KWMTBOMO12229	0.311479667042893
157	KWMTBOMO15340	KWMTBOMO16139	0.139999399217048
158	KWMTBOMO15340	KWMTBOMO12585	0.114885990530684
159	KWMTBOMO15340	KWMTBOMO16141	0.111882317563779
160	KWMTBOMO15340	KWMTBOMO12895	0.118578468656376
161	KWMTBOMO15340	KWMTBOMO13254	0.186059072999893
162	KWMTBOMO15340	KWMTBOMO16144	0.14099744750101
163	KWMTBOMO15340	KWMTBOMO16146	0.173956833878026
164	KWMTBOMO15340	KWMTBOMO08464	0.604011242419741
165	KWMTBOMO15340	KWMTBOMO16422	0.133599191848114
166	KWMTBOMO15340	KWMTBOMO13471	0.266336166825035
167	KWMTBOMO15340	KWMTBOMO13553	0.0832661535977054
168	KWMTBOMO15340	KWMTBOMO16456	0.145677816308466
169	KWMTBOMO15340	KWMTBOMO16600	0.417979903048895
170	KWMTBOMO15340	KWMTBOMO00971	0.220288144124839
