# Supplementary material for: A silkworm model reveals coordinated cellular communities and conserved Hippo regulation in silk production
Source: Research Square preprint supplement (doi:10.21203/rs.3.rs-7747598/v1), 2025-10-01
Supplement: Supplementary file 77 [file Supplementary Data 9.xlsx]

## Sheet: main
Supplementary Data 9. Representative KEGG pathways for the coexpression modules in FBSs.

## Sheet: KEGG pathway for FBSs modules
	Cluster	category	subcategory	ID	Description	GeneRatio	BgRatio	pvalue	p.adjust	qvalue	geneID	Count
1	FBSs-M1 (193)	Cellular Processes	Transport and catabolism	bmor04144	Endocytosis	0.103626943005181	117/3655	1.97520644842538e-06	0.000248876012501598	0.00023286644444594	733058/101742207/101741546/101741262/100144600/101737965/101746390/101745967/100233163/101738908/101740542/101738157/100862772/101745393/101742411/101744693/733093/692822/101737568/733063	20
2	FBSs-M1 (193)	Environmental Information Processing	Signal transduction	bmor04013	MAPK signaling pathway - fly	0.0621761658031088	77/3655	0.00059123191873501	0.0372476108803056	0.0348515657359585	101741200/692449/101742601/101743223/100529210/100862753/101738615/101740276/100862655/101743676/101743695/101743155	12
3	FBSs-M2 (185)	Genetic Information Processing	Translation	bmor03015	mRNA surveillance pathway	0.0810810810810811	70/3655	1.29009272674497e-06	0.000163841776296611	0.000156169119553339	101736072/101746324/101740584/101739716/733020/692806/101739316/101739030/101737197/101742327/100127018/101743604/101735812/101735318/101741574	15
4	FBSs-M2 (185)	Genetic Information Processing	Translation	bmor03013	Nucleocytoplasmic transport	0.0810810810810811	80/3655	7.57406200549957e-06	0.000480952937349223	0.000458430068753921	101736825/101742901/101741777/101735669/101741033/101742428/101740002/101735469/101742889/101737307/101744401/101737898/101739030/101742327/101735812	15
5	FBSs-M3 (172)	Genetic Information Processing	Translation	bmor03008	Ribosome biogenesis in eukaryotes	0.168604651162791	78/3655	9.11430435150545e-20	8.56744609041513e-18	8.25084393925757e-18	101741801/101739183/692502/101735934/101735526/101736458/101740273/101746403/101742367/101742911/101739847/101739095/101745565/101746947/101735989/101744824/692538/100862801/100862774/101735682/101746348/101738878/101736688/101745253/101742143/101744752/101736210/732976/101745671	29
6	FBSs-M3 (172)	Genetic Information Processing	Translation	bmor00970	Aminoacyl-tRNA biosynthesis	0.0813953488372093	39/3655	8.33826041706109e-10	3.91898239601871e-08	3.7741599782487e-08	101737924/693023/101736198/101737531/101745867/101746989/101743685/101739599/101738873/101742209/101743384/101740690/101742308/101739247	14
7	FBSs-M3 (172)	Genetic Information Processing	Transcription	bmor03040	Spliceosome	0.0930232558139535	128/3655	0.000264016563727949	0.00827251899680907	0.00796681560722934	733108/733079/101745188/100146101/101745122/101736496/101738508/692785/778469/101745281/101737477/733037/101743561/732985/101736177/101742628	16
8	FBSs-M4 (88)	Environmental Information Processing	Signal transduction	bmor04391	Hippo signaling pathway - fly	0.0909090909090909	55/3655	3.95855270286679e-05	0.00340435532446544	0.00316684216229344	101737820/101745221/101745685/101743174/101747103/101742621/101740520/101740701	8
9	FBSs-M6 (20)	Metabolism	Carbohydrate metabolism	bmor00520	Amino sugar and nucleotide sugar metabolism	0.2	48/3655	0.000108778002691041	0.00522134412916995	0.00446562326836903	100884166/692403/101736080/101745028	4
10	FBSs-M7 (172)	Genetic Information Processing	Translation	bmor03010	Ribosome	0.476744186046512	130/3655	8.11276556252292e-84	5.35442527126513e-82	5.35442527126513e-82	692699/692689/693066/100101149/692668/692693/692710/692706/692658/692720/692696/692667/692670/692724/692703/778516/692701/692654/692700/732857/692602/692659/692694/692669/778454/692664/692779/732854/693068/101745675/101740286/778452/693067/692697/692704/693058/692712/692722/692662/692557/692715/692705/692663/692717/778451/100101170/692665/692657/692707/692660/692692/693118/693065/692424/692698/10…	82
11	FBSs-M7 (172)	Metabolism	Energy metabolism	bmor00190	Oxidative phosphorylation	0.203488372093023	131/3655	2.16430609241993e-18	7.14221010498576e-17	7.14221010498576e-17	101742612/100174851/732934/751613/778510/100134927/101738009/101738229/101738548/733017/732989/101740204/101739775/100101181/100101165/101744608/101745713/101738045/101744632/693099/692926/101739007/101743811/101738954/780848/101739528/100134926/101746562/101737774/692866/101741007/733114/101746156/778517/778519	35
